# Supplementary material for: Identification of Proteins Enriched in Rice Egg or Sperm Cells by Single-Cell Proteomics
Source: PLoS One. 2013 Jul 25;8(7):e69578. doi: 10.1371/journal.pone.0069578 (PMC3723872; doi:10.1371/journal.pone.0069578)
Supplement: Table S4 — Proteins detected in rice egg cells by LC-MS/MS. (XLS) [file pone.0069578.s007.xls]

## Sheet: Table S4
Table S4. Proteins detected in rice egg cells by LC-MS/MS analysis. (a) Protein annotations are referred from The Rice Annotation Project Database (RAPDB). (b) The left- and right-most ends of the number represent modification of the N- and C-terminal residues of the peptide, respectively. The number between them represents the side chain of each corresponding amino acid. 0, no modification; 1, N…
cDNA accession	Gene locus	Proteina	Protein MW	Peptide identified	Modificationb	Startc	Endc	m/z	Charge	Delta mass (ppm)	Expect score (P-value)d	Number of spectrum identifiede
AK121523	Os01g0100700	Similar to 40S ribosomal protein S5-1. (Os01t0100700-01)	22425.8	M-AVVEQPQQQVVK-L	10000000000000	2	13	697.89	2	6.93304	0.000247429	5
AK121523	Os01g0100700	Similar to 40S ribosomal protein S5-1. (Os01t0100700-01)	22425.8	R-RQAVDISPLR-R	000000000000	132	141	577.839	2	5.25233	0.000375834	5
AK121523	Os01g0100700	Similar to 40S ribosomal protein S5-1. (Os01t0100700-01)	22425.8	R-QAVDISPLR-R	00000000000	133	141	499.788	2	6.35669	0.0379737	5
AK121523	Os01g0100700	Similar to 40S ribosomal protein S5-1. (Os01t0100700-01)	22425.8	R-RVNQAIYLLTTGAR-E	0000000000000000	142	155	788.458	2	8.12725	1.64614e-07	5
AK121523	Os01g0100700	Similar to 40S ribosomal protein S5-1. (Os01t0100700-01)	22425.8	R-VNQAIYLLTTGAR-E	000000000000000	143	155	710.406	2	6.4618	3.19045e-08	5
AK063774	Os01g0102700	Translocon-associated beta family protein. (Os01t0102700-01)	22802.1	R-LDPGVTASHAFVLETK-V	000000000000000000	87	102	842.955	2	6.7821	3.56302e-05	4
AK063774	Os01g0102700	Translocon-associated beta family protein. (Os01t0102700-01)	22802.1	R-FQGSPAVITYR-V	0000000000000	107	117	619.834	2	6.07018	0.0115206	4
AK063774	Os01g0102700	Translocon-associated beta family protein. (Os01t0102700-01)	22802.1	R-FQGSPAVITYRVPTK-A	00000000000000000	107	121	832.464	2	2.00609	0.00345951	4
AK060999	Os01g0106200	Similar to RER1A protein (AtRER1A). (Os01t0106200-01)	21825.4	--MDGAADSGTAGAAAAAAK-W	10000000000000000000	1	18	774.854	2	3.63617	7.46943e-05	1
AK061325	Os01g0106300	Similar to Isoflavone reductase homolog IRL (EC 1.3.1.-). (Os01t0106300-01)	34425.8	R-ILVVGGTGYIGR-H	00000000000000	14	25	602.858	2	3.67997	6.85496e-05	6
AK061325	Os01g0106300	Similar to Isoflavone reductase homolog IRL (EC 1.3.1.-). (Os01t0106300-01)	34425.8	K-AQLLHTFR-D	0000000000	53	60	493.284	2	3.84869	0.00239952	6
AK061325	Os01g0106300	Similar to Isoflavone reductase homolog IRL (EC 1.3.1.-). (Os01t0106300-01)	34425.8	R-DAGVTLLHGDLHDHASLLR-A	000000000000000000000	61	79	680.697	3	7.31211	0.0300823	6
AK061325	Os01g0106300	Similar to Isoflavone reductase homolog IRL (EC 1.3.1.-). (Os01t0106300-01)	34425.8	R-DADVVISAVR-A	000000000000	83	92	522.792	2	7.2505	0.00537329	6
AK061325	Os01g0106300	Similar to Isoflavone reductase homolog IRL (EC 1.3.1.-). (Os01t0106300-01)	34425.8	R-LIDAIKEAGGGR-V	00000000000000	102	113	600.346	2	7.93376	0.0269062	6
AK061325	Os01g0106300	Similar to Isoflavone reductase homolog IRL (EC 1.3.1.-). (Os01t0106300-01)	34425.8	R-GASAAVEPVR-S	000000000000	129	138	478.765	2	7.42117	0.0386287	6
AK109339	Os01g0106400	Similar to Isoflavone reductase homolog IRL (EC 1.3.1.-). (Os01t0106400-01)	33480.7	R-ILVVGGTGYIGR-H	00000000000000	12	23	602.858	2	3.67997	6.85496e-05	3
AK109339	Os01g0106400	Similar to Isoflavone reductase homolog IRL (EC 1.3.1.-). (Os01t0106400-01)	33480.7	R-DAGVTLLHGDLYDHASLLSAVR-D	000000000000000000000000	59	80	775.082	3	11.8843	0.00117549	3
AK109339	Os01g0106400	Similar to Isoflavone reductase homolog IRL (EC 1.3.1.-). (Os01t0106400-01)	33480.7	K-NAVSHEELVALWEK-K	0000000000000000	226	239	812.925	2	6.3905	0.0028369	3
AK099387	Os01g0118000	Similar to Fructose-bisphosphate aldolase (EC 4.1.2.13) (Fragment). (Os01t0118000-01)	42322.9	R-AAAVSYADELVSTAK-S	00000000000000000	36	50	748.391	2	7.91498	0.000338092	5
AK099387	Os01g0118000	Similar to Fructose-bisphosphate aldolase (EC 4.1.2.13) (Fragment). (Os01t0118000-01)	42322.9	K-TWQGRPENVEAAQK-A	0000000000000000	338	351	807.41	2	6.35489	0.00255198	5
AK099387	Os01g0118000	Similar to Fructose-bisphosphate aldolase (EC 4.1.2.13) (Fragment). (Os01t0118000-01)	42322.9	R-AKANSLAQLGR-Y	0000000000000	357	367	564.828	2	0.991452	1.05548e-05	5
AK099387	Os01g0118000	Similar to Fructose-bisphosphate aldolase (EC 4.1.2.13) (Fragment). (Os01t0118000-01)	42322.9	K-ANSLAQLGR-Y	00000000000	359	367	465.266	2	8.12977	8.88295e-05	5
AK099387	Os01g0118000	Similar to Fructose-bisphosphate aldolase (EC 4.1.2.13) (Fragment). (Os01t0118000-01)	42322.9	R-YTGEGESDEAKK-G	00000000000000	368	379	657.3	2	5.16203	0.00951737	5
AK105256	Os01g0119500	Protein of unknown function DUF1618 domain containing protein. (Os01t0119500-01)	51265.2	R-QNAEAAGKVGASAK-G	0000000000000000	433	446	651.337	2	-11.3797	0.0321837	1
AK104753	Os01g0120400	Alanyl-tRNA synthetase, class IIc family protein. (Os01t0120400-01), Alanyl-tRNA synthetase, class IIc family protein. (Os01t0120400-02)	28445.3	R-FIVDDVRMK-D	00000000300	74	82	569.796	2	-6.58832	0.0394627	1
AK122166	Os01g0120800	Similar to Eukaryotic translation initiation factor 3 subunit 10 (eIF-3 theta) (Eukaryotic translation initiation factor 3 large subunit) (eIF3a). (Os01t0120800-01), Similar to Translation initiation factor 3. (Os01t0120800-02), Similar to Translation initiation factor 3. (Os01t0120800-03), Similar to Translation initiation factor 3. (Os01t0120800-04), Similar to Translation initiation factor 3. …	114322	R-AEELIHVGQK-Q	000000000000	14	23	562.311	2	3.86441	0.00822944	3
AK122166	Os01g0120800	Similar to Eukaryotic translation initiation factor 3 subunit 10 (eIF-3 theta) (Eukaryotic translation initiation factor 3 large subunit) (eIF3a). (Os01t0120800-01), Similar to Translation initiation factor 3. (Os01t0120800-02), Similar to Translation initiation factor 3. (Os01t0120800-03), Similar to Translation initiation factor 3. (Os01t0120800-04), Similar to Translation initiation factor 3. …	114322	K-YGASHLELENEKDR-N	0000000000000000	337	350	554.271	3	4.44728	0.00390259	3
AK122166	Os01g0120800	Similar to Eukaryotic translation initiation factor 3 subunit 10 (eIF-3 theta) (Eukaryotic translation initiation factor 3 large subunit) (eIF3a). (Os01t0120800-01), Similar to Translation initiation factor 3. (Os01t0120800-02), Similar to Translation initiation factor 3. (Os01t0120800-03), Similar to Translation initiation factor 3. (Os01t0120800-04), Similar to Translation initiation factor 3. …	114322	R-IANLVNFSLDSK-R	00000000000000	354	365	660.866	2	7.09069	0.00675657	3
AK121927	Os01g0125800	WD40/YVTN repeat-like domain containing protein. (Os01t0125800-01)	67306.8	K-QVLTVSADKTAK-V	00000000000000	247	258	630.866	2	6.63929	0.0492439	1
AK103631	Os01g0125900	Ubiquitin-conjugating enzyme/RWD-like domain containing protein. (Os01t0125900-01)	118128	R-LASELFAR-E	0000000000	725	732	453.759	2	6.9949	0.0268364	1
AK121214	Os01g0128400	Conserved hypothetical protein. (Os01t0128400-01), Similar to predicted protein. (Os01t0128400-02)	63774.3	R-TKNEAALEAATDSGK-Q	00000000000000000	507	521	753.38	2	6.17948	8.89263e-08	1
AK065247	Os01g0133400	Similar to Hexose transporter (Fragment). (Os01t0133400-01)	56821.2	R-ATATVDPEDIPLEK-V	0000000000000000	79	92	749.89	2	5.51215	0.0419804	3
AK065247	Os01g0133400	Similar to Hexose transporter (Fragment). (Os01t0133400-01)	56821.2	K-LSQAETAIK-K	00000000000	293	301	480.775	2	7.08855	0.000529838	3
AK065247	Os01g0133400	Similar to Hexose transporter (Fragment). (Os01t0133400-01)	56821.2	K-VAEVMYDLK-A	00000300000	309	317	542.276	2	5.79409	0.0343223	3
AK065080	Os01g0139200	Octicosapeptide/Phox/Bem1p domain containing protein. (Os01t0139200-01), Octicosapeptide/Phox/Bem1p domain containing protein. (Os01t0139200-02)	70538.6	R-SLLGGQPFTLK-Y	0000000000000	103	113	580.841	2	5.69692	0.00157895	3
AK065080	Os01g0139200	Octicosapeptide/Phox/Bem1p domain containing protein. (Os01t0139200-01), Octicosapeptide/Phox/Bem1p domain containing protein. (Os01t0139200-02)	70538.6	K-LAAAAAVAAAR-H	0000000000000	247	257	478.291	2	6.8243	5.06773e-10	3
AK065080	Os01g0139200	Octicosapeptide/Phox/Bem1p domain containing protein. (Os01t0139200-01), Octicosapeptide/Phox/Bem1p domain containing protein. (Os01t0139200-02)	70538.6	K-QPELQQPGLYR-T	0000000000000	572	582	664.853	2	1.93802	0.0166024	3
AK067644	Os01g0141100	Similar to Salt-induced AAA-Type ATPase. (Os01t0141100-01), Similar to Vacuolar sorting protein 4b. (Os01t0141100-02)	30925.2	K-QAVQEDNAGNYVK-A	000000000000000	15	27	718.346	2	2.39717	0.00863008	1
AK108438	Os01g0143300	Similar to Glycine-rich protein (Fragment). (Os01t0143300-01)	29489.5	K-ISDEKGFNSITLTR-T	0000000000000000	98	111	790.923	2	6.53414	0.000161814	4
AK108438	Os01g0143300	Similar to Glycine-rich protein (Fragment). (Os01t0143300-01)	29489.5	K-GFNSITLTR-T	00000000000	103	111	504.781	2	7.0278	0.00822924	4
AK108438	Os01g0143300	Similar to Glycine-rich protein (Fragment). (Os01t0143300-01)	29489.5	K-SSIPLTVTISK-G	0000000000000	158	168	573.346	2	7.076	0.000629974	4
Os01g0143700	Os01g0143700	Hypothetical conserved gene. (Os01t0143700-00)	29241.6	K-SSIPLTVTISK-G	0000000000000	153	163	573.346	2	7.076	0.000629974	1
AK060920	Os01g0147900	Triosephosphate isomerase, cytosolic (EC 5.3.1.1) (TIM) (Triose- phosphate isomerase). (Os01t0147900-01)	27330.2	R-SLLGESNEFVGDK-V	000000000000000	101	113	697.848	2	6.34236	1.05639e-05	11
AK060920	Os01g0147900	Triosephosphate isomerase, cytosolic (EC 5.3.1.1) (TIM) (Triose- phosphate isomerase). (Os01t0147900-01)	27330.2	K-VAYALSQGLK-V	000000000000	114	123	525.305	2	4.505	0.000180555	11
AK060920	Os01g0147900	Triosephosphate isomerase, cytosolic (EC 5.3.1.1) (TIM) (Triose- phosphate isomerase). (Os01t0147900-01)	27330.2	K-VIACVGETLEQR-E	00000000000000	124	135	694.869	2	7.06033	4.86826e-05	11
AK060920	Os01g0147900	Triosephosphate isomerase, cytosolic (EC 5.3.1.1) (TIM) (Triose- phosphate isomerase). (Os01t0147900-01)	27330.2	R-ESGSTMDVVAAQTK-A	0000000000000000	136	149	712.346	2	7.40301	4.03988e-05	11
AK060920	Os01g0147900	Triosephosphate isomerase, cytosolic (EC 5.3.1.1) (TIM) (Triose- phosphate isomerase). (Os01t0147900-01)	27330.2	R-IKDWTNVVVAYEPVWAIGTGK-V	00000000000000000000000	155	175	1173.63	2	4.18955	0.000194959	11
AK060920	Os01g0147900	Triosephosphate isomerase, cytosolic (EC 5.3.1.1) (TIM) (Triose- phosphate isomerase). (Os01t0147900-01)	27330.2	K-VATPDQAQEVHDGLR-K	00000000000000000	176	190	818.414	2	6.92437	4.55702e-05	11
AK060920	Os01g0147900	Triosephosphate isomerase, cytosolic (EC 5.3.1.1) (TIM) (Triose- phosphate isomerase). (Os01t0147900-01)	27330.2	K-VATPDQAQEVHDGLRK-W	000000000000000000	176	191	882.46	2	5.60818	0.000107257	11
AK060920	Os01g0147900	Triosephosphate isomerase, cytosolic (EC 5.3.1.1) (TIM) (Triose- phosphate isomerase). (Os01t0147900-01)	27330.2	R-KWLAANVSAEVAESTR-I	000000000000000000	191	206	866.462	2	7.8232	9.36363e-08	11
AK060920	Os01g0147900	Triosephosphate isomerase, cytosolic (EC 5.3.1.1) (TIM) (Triose- phosphate isomerase). (Os01t0147900-01)	27330.2	K-WLAANVSAEVAESTR-I	00000000000000000	192	206	802.412	2	5.5408	1.75044e-10	11
AK060920	Os01g0147900	Triosephosphate isomerase, cytosolic (EC 5.3.1.1) (TIM) (Triose- phosphate isomerase). (Os01t0147900-01)	27330.2	R-IIYGGSVTGANCK-E	000000000000000	207	219	677.35	2	7.42673	0.00676311	11
AK099949	Os01g0151700	Similar to Short-chain dehydrogenase Tic32. (Os01t0151700-01)	35103.2	R-GAHVIIAAR-N	00000000000	57	65	454.28	2	6.682	0.00244498	1
AK069905	Os01g0160100	Similar to Pyruvate decarboxylase isozyme 2 (EC 4.1.1.1) (PDC) (Fragment). (Os01t0160100-01)	65306.9	K-AVKPVLVGGPK-M	0000000000000	243	253	532.845	2	-0.319981	0.00637901	3
AK069905	Os01g0160100	Similar to Pyruvate decarboxylase isozyme 2 (EC 4.1.1.1) (PDC) (Fragment). (Os01t0160100-01)	65306.9	R-VSAANSRPPNPQ--	00000000000000	586	597	619.322	2	6.40216	4.62225e-05	3
AK103756	Os01g0168200	Similar to Thioredoxin-like protein. (Os01t0168200-01)	14769.2	K-LVGANKPELEK-K	0000000000000	112	122	599.35	2	6.75315	0.024067	1
AK121293	Os01g0169900	Protein of unknown function DUF1421 family protein. (Os01t0169900-01)	61252.1	R-THHLENSVDDLK-I	00000000000000	166	177	704.349	2	2.90126	0.044467	2
AK121293	Os01g0169900	Protein of unknown function DUF1421 family protein. (Os01t0169900-01)	61252.1	R-EVQAGVQILR-D	000000000000	200	209	556.828	2	5.94349	0.0021663	2
AK101269	Os01g0170700	Thiol-activated cytolysin family protein. (Os01t0170700-01)	46385.3	K-IVDKKSWR-A	0000000000	107	114	516.306	2	4.88276	0.0288547	1
D73411	Os01g0172400	Phospholipase D alpha 1 precursor (EC 3.1.4.4) (PLD alpha 1) (Choline phosphatase 1) (Phosphatidylcholine-hydrolyzing phospholipase D 1). (Os01t0172400-01), Phospholipase D alpha 1 precursor (EC 3.1.4.4) (PLD alpha 1) (Choline phosphatase 1) (Phosphatidylcholine-hydrolyzing phospholipase D 1). (Os01t0172400-02), Phospholipase D alpha 1 precursor (EC 3.1.4.4) (PLD alpha 1) (Choline phosphatase 1) …	92800.4	K-IDNPIGATNIGR-A	00000000000000	101	112	620.838	2	3.58628	0.0450375	2
D73411	Os01g0172400	Phospholipase D alpha 1 precursor (EC 3.1.4.4) (PLD alpha 1) (Choline phosphatase 1) (Phosphatidylcholine-hydrolyzing phospholipase D 1). (Os01t0172400-01), Phospholipase D alpha 1 precursor (EC 3.1.4.4) (PLD alpha 1) (Choline phosphatase 1) (Phosphatidylcholine-hydrolyzing phospholipase D 1). (Os01t0172400-02), Phospholipase D alpha 1 precursor (EC 3.1.4.4) (PLD alpha 1) (Choline phosphatase 1) …	92800.4	K-AGLVSGKDQIIDR-S	000000000000000	490	502	686.386	2	4.38383	0.000264075	2
AK121114	Os01g0173100	Alba, DNA/RNA-binding protein family protein. (Os01t0173100-01)	16250.4	M-AVEEITEGVR-N	000000000000	2	11	551.795	2	7.66499	0.0106748	4
AK121114	Os01g0173100	Alba, DNA/RNA-binding protein family protein. (Os01t0173100-01)	16250.4	R-NLAVEGEPAAAAAAAGGGGEGAQR-R	00000000000000000000000000	12	35	1048.02	2	6.01898	2.50957e-06	4
AK121114	Os01g0173100	Alba, DNA/RNA-binding protein family protein. (Os01t0173100-01)	16250.4	K-KPLFFYVNLAK-R	0000000000000	52	62	670.397	2	7.02121	0.0142347	4
AK121114	Os01g0173100	Alba, DNA/RNA-binding protein family protein. (Os01t0173100-01)	16250.4	R-TSTVEINDESR-V	0000000000000	103	113	625.801	2	6.41978	0.00113952	4
AK121114	Os01g0173100	Alba, DNA/RNA-binding protein family protein. (Os01t0173100-01)	16250.4	K-FDELMAAAAEER-E	00000000000000	132	143	676.815	2	5.40399	2.19923e-05	4
AK071324	Os01g0174300	Flavoprotein pyridine nucleotide cytochrome reductase domain containing protein. (Os01t0174300-01)	34043.8	K-ATVSHNSQLFR-F	0000000000000	70	80	630.331	2	5.1227	0.0206751	7
AK071324	Os01g0174300	Flavoprotein pyridine nucleotide cytochrome reductase domain containing protein. (Os01t0174300-01)	34043.8	R-FSFDPSTK-L	0000000000	81	88	464.727	2	6.56407	0.0271649	7
AK071324	Os01g0174300	Flavoprotein pyridine nucleotide cytochrome reductase domain containing protein. (Os01t0174300-01)	34043.8	R-APIGEEVEGGR-K	0000000000000	101	111	557.278	2	-5.0962	0.000825278	7
AK071324	Os01g0174300	Flavoprotein pyridine nucleotide cytochrome reductase domain containing protein. (Os01t0174300-01)	34043.8	R-APIGEEVEGGRK-F	00000000000000	101	112	621.332	2	6.34444	0.00202029	7
AK071324	Os01g0174300	Flavoprotein pyridine nucleotide cytochrome reductase domain containing protein. (Os01t0174300-01)	34043.8	R-LASSYPNFK-V	00000000000	224	232	513.766	2	0.228703	0.0384712	7
AK071324	Os01g0174300	Flavoprotein pyridine nucleotide cytochrome reductase domain containing protein. (Os01t0174300-01)	34043.8	K-VFYTVDKPSNDWR-G	000000000000000	233	245	813.905	2	7.1845	0.0290286	7
AK071324	Os01g0174300	Flavoprotein pyridine nucleotide cytochrome reductase domain containing protein. (Os01t0174300-01)	34043.8	K-ELGYTAEMVYK-F	0000000000000	300	310	652.319	2	5.2321	0.0297065	7
AK060966	Os01g0174900	Thioredoxin fold domain containing protein. (Os01t0174900-01)	20309.3	R-VAADPDTHQDFQPTSK-S	000000000000000000	55	70	878.915	2	5.2542	0.00832499	1
AK106131	Os01g0175000	Phospholipase/carboxylesterase domain containing protein. (Os01t0175000-01), Similar to Biostress-resistance-related protein (Fragment). (Os01t0175000-02), Similar to Biostress-resistance-related protein (Fragment). (Os01t0175000-03)	31970.5	K-TTGFSNVVFK-S	000000000000	276	285	550.295	2	4.91009	7.08825e-05	1
AK103230	Os01g0177200	Similar to Ubiquitin-specific protease 14. (Os01t0177200-01)	89319	K-SGNPVYLHIVQR-R	00000000000000	60	71	691.883	2	3.91685	0.00295683	6
AK103230	Os01g0177200	Similar to Ubiquitin-specific protease 14. (Os01t0177200-01)	89319	R-IAVDKVILAESADR-K	0000000000000000	133	146	750.428	2	3.70988	0.00140644	6
AK103230	Os01g0177200	Similar to Ubiquitin-specific protease 14. (Os01t0177200-01)	89319	R-IAVDKVILAESADRK-Q	00000000000000000	133	147	543.32	3	4.19458	0.0173937	6
AK103230	Os01g0177200	Similar to Ubiquitin-specific protease 14. (Os01t0177200-01)	89319	K-VILAESADRK-Q	000000000000	138	147	551.32	2	5.13858	0.00476079	6
AK103230	Os01g0177200	Similar to Ubiquitin-specific protease 14. (Os01t0177200-01)	89319	K-LAHGMLSGK-Y	00000000000	367	375	457.252	2	4.9874	0.0041622	6
AK103230	Os01g0177200	Similar to Ubiquitin-specific protease 14. (Os01t0177200-01)	89319	K-ALAASGGNIER-A	0000000000000	691	701	529.786	2	5.20776	0.000604665	6
AK067702	Os01g0178000	Pyridoxal phosphate-dependent transferase, major region, subdomain 1 domain containing protein. (Os01t0178000-01), Similar to Transaminase/ transferase, transferring nitrogenous groups. (Os01t0178000-02)	44074.4	R-RAVETEAPVMVK-M	00000000000000	10	21	665.368	2	7.187	0.0166397	4
AK067702	Os01g0178000	Pyridoxal phosphate-dependent transferase, major region, subdomain 1 domain containing protein. (Os01t0178000-01), Similar to Transaminase/ transferase, transferring nitrogenous groups. (Os01t0178000-02)	44074.4	K-IKEIVWEPSISK-Y	00000000000000	52	63	714.914	2	8.17231	0.046266	4
AK067702	Os01g0178000	Pyridoxal phosphate-dependent transferase, major region, subdomain 1 domain containing protein. (Os01t0178000-01), Similar to Transaminase/ transferase, transferring nitrogenous groups. (Os01t0178000-02)	44074.4	K-GGEGAIYLWAK-L	0000000000000	316	326	582.81	2	6.82898	0.000819441	4
AK067702	Os01g0178000	Pyridoxal phosphate-dependent transferase, major region, subdomain 1 domain containing protein. (Os01t0178000-01), Similar to Transaminase/ transferase, transferring nitrogenous groups. (Os01t0178000-02)	44074.4	K-HGVAVIPGSASGGPGYIR-V	00000000000000000000	345	362	565.641	3	6.66324	0.00274449	4
Os01g0178200	Os01g0178200	Similar to integral membrane family protein. (Os01t0178200-00)	35629.7	R-AAVAVAAGGAIAAR-A	0000000000000000	15	28	584.848	2	7.17195	0.00527189	1
Os01g0178600	Os01g0178600	Peptidase A1 domain containing protein. (Os01t0178600-00)	46726.2	R-AAAIAGSASSSASGGGAADDVVSK-V	00000000000000000000000000	70	93	1003.99	2	5.07824	1.82921e-09	1
AK066179	Os01g0179300	Conserved hypothetical protein. (Os01t0179300-01), Similar to early fruit mRNA. (Os01t0179300-02)	35262.3	K-KAAVPVAPPKDTER-Q	0000000000000000	166	179	493.618	3	4.81209	0.00088339	2
AK066179	Os01g0179300	Conserved hypothetical protein. (Os01t0179300-01), Similar to early fruit mRNA. (Os01t0179300-02)	35262.3	K-GSNQTGDGDAPAPSESK-S	0000000000000000000	221	237	809.357	2	4.50111	0.0288704	2
AK069903	Os01g0179700	Similar to GTP-binding protein YPTM2. (Os01t0179700-01), Similar to GTP-binding protein YPTM2. (Os01t0179700-02)	22719.3	K-LQIWDTAGQER-F	0000000000000	59	69	658.837	2	5.76318	0.000109791	5
AK069903	Os01g0179700	Similar to GTP-binding protein YPTM2. (Os01t0179700-01), Similar to GTP-binding protein YPTM2. (Os01t0179700-02)	22719.3	R-TITSSYYR-G	0000000000	72	79	495.752	2	7.01158	0.0295256	5
AK069903	Os01g0179700	Similar to GTP-binding protein YPTM2. (Os01t0179700-01), Similar to GTP-binding protein YPTM2. (Os01t0179700-02)	22719.3	K-SDLTANKVVSSETAK-A	00000000000000000	123	137	775.414	2	8.6844	0.0132469	5
AK069903	Os01g0179700	Similar to GTP-binding protein YPTM2. (Os01t0179700-01), Similar to GTP-binding protein YPTM2. (Os01t0179700-02)	22719.3	R-MASQPAASNARPPTVQIR-G	00000000000000000000	173	190	632.339	3	5.53448	0.0481457	5
AK100676	Os01g0180800	Heat shock protein Hsp70 family protein. (Os01t0180800-01), Similar to heat shock 70 kDa protein 4. (Os01t0180800-02), Similar to heat shock 70 kDa protein 4. (Os01t0180800-03)	94114.4	R-GIDVVLNEESKR-E	00000000000000	22	33	679.871	2	5.71064	0.00445566	8
AK100676	Os01g0180800	Heat shock protein Hsp70 family protein. (Os01t0180800-01), Similar to heat shock 70 kDa protein 4. (Os01t0180800-02), Similar to heat shock 70 kDa protein 4. (Os01t0180800-03)	94114.4	R-FIGTAGAASSTMNPK-N	00000000000030000	47	61	734.861	2	3.04411	2.25801e-06	8
AK100676	Os01g0180800	Heat shock protein Hsp70 family protein. (Os01t0180800-01), Similar to heat shock 70 kDa protein 4. (Os01t0180800-02), Similar to heat shock 70 kDa protein 4. (Os01t0180800-03)	94114.4	R-FIGTAGAASSTMNPK-N	00000000000000000	47	61	726.866	2	7.23173	0.000706597	8
AK100676	Os01g0180800	Heat shock protein Hsp70 family protein. (Os01t0180800-01), Similar to heat shock 70 kDa protein 4. (Os01t0180800-02), Similar to heat shock 70 kDa protein 4. (Os01t0180800-03)	94114.4	R-VSEGPDGFPLVHAR-Y	0000000000000000	91	104	740.883	2	2.97483	0.0102726	8
AK100676	Os01g0180800	Heat shock protein Hsp70 family protein. (Os01t0180800-01), Similar to heat shock 70 kDa protein 4. (Os01t0180800-02), Similar to heat shock 70 kDa protein 4. (Os01t0180800-03)	94114.4	K-ALAEAGLTTENVHFVEVVGSGSR-V	0000000000000000000000000	321	343	781.739	3	3.41802	3.751e-05	8
AK100676	Os01g0180800	Heat shock protein Hsp70 family protein. (Os01t0180800-01), Similar to heat shock 70 kDa protein 4. (Os01t0180800-02), Similar to heat shock 70 kDa protein 4. (Os01t0180800-03)	94114.4	K-METDDAPNEAASGTDVNMQEAK-A	000000000000000000000000	516	537	1162.5	2	7.61078	0.000399193	8
AK100676	Os01g0180800	Heat shock protein Hsp70 family protein. (Os01t0180800-01), Similar to heat shock 70 kDa protein 4. (Os01t0180800-02), Similar to heat shock 70 kDa protein 4. (Os01t0180800-03)	94114.4	K-APADAAADGAENGAPNSEEK-S	0000000000000000000000	538	557	942.923	2	9.80462	3.45425e-06	8
AK071240	Os01g0184200	Conserved hypothetical protein. (Os01t0184200-01)	18161.3	R-AMAATPADVK-D	000000000000	49	58	487.756	2	6.72263	0.0145374	1
AK065125	Os01g0185200	Similar to glutaminyl-tRNA synthetase. (Os01t0185200-01), Similar to glutaminyl-tRNA synthetase. (Os01t0185200-02), Glutaminyl-tRNA synthetase, class Ic domain containing protein. (Os01t0185200-03)	90486.4	R-TAENALVNSK-V	000000000000	28	37	523.779	2	3.52152	0.000468243	3
AK065125	Os01g0185200	Similar to glutaminyl-tRNA synthetase. (Os01t0185200-01), Similar to glutaminyl-tRNA synthetase. (Os01t0185200-02), Glutaminyl-tRNA synthetase, class Ic domain containing protein. (Os01t0185200-03)	90486.4	R-DRPIEESLK-L	00000000000	387	395	543.796	2	4.92188	0.00620831	3
AK065125	Os01g0185200	Similar to glutaminyl-tRNA synthetase. (Os01t0185200-01), Similar to glutaminyl-tRNA synthetase. (Os01t0185200-02), Glutaminyl-tRNA synthetase, class Ic domain containing protein. (Os01t0185200-03)	90486.4	K-DSKDYYGLAPGK-S	00000000000000	640	651	657.326	2	6.08146	0.0319917	3
AK065131	Os01g0185300	Transferase family protein. (Os01t0185300-01), Similar to 3-N-debenzoyl-2-deoxytaxol N-benzoyltransferase. (Os01t0185300-02)	46633.6	R-ALVFFYPLAGR-I	0000000000000	67	77	627.36	2	6.36397	0.00026818	1
AK058815	Os01g0191100	Similar to Acidic ribosomal protein P2a-4 (Fragment). (Os01t0191100-01)	11741.7	K-MELLLSQVSGK-D	0000000000000	39	49	602.836	2	4.26152	0.00172358	2
AK058815	Os01g0191100	Similar to Acidic ribosomal protein P2a-4 (Fragment). (Os01t0191100-01)	11741.7	R-EKFASVPSGGGGVAVAAAAPAAGGAGGAPAAEAK-K	000000000000000000000000000000000000	60	93	941.49	3	4.80798	0.000370219	2
AK058815	Os01g0191100	Similar to Acidic ribosomal protein P2a-4 (Fragment). (Os01t0191100-01)	11741.7	K-FASVPSGGGGVAVAAAAPAAGGAGGAPAAEAK-K	0000000000000000000000000000000000	62	93	1283.16	2	5.37695	0.0017197	2
AK101856	Os01g0191500	Similar to Mitochondrial processing peptidase. (Os01t0191500-01)	54196.9	R-SSGGFWTWLTGAR-S	000000000000000	36	48	713.357	2	11.0127	0.00968867	9
AK101856	Os01g0191500	Similar to Mitochondrial processing peptidase. (Os01t0191500-01)	54196.9	K-MAYTTTTNR-S	00000000000	125	133	529.753	2	4.08776	0.0321877	9
AK101856	Os01g0191500	Similar to Mitochondrial processing peptidase. (Os01t0191500-01)	54196.9	R-LNTNVLEYFLAENYTAPR-I	00000000000000000000	239	256	1064.55	2	6.04906	9.21379e-05	9
AK101856	Os01g0191500	Similar to Mitochondrial processing peptidase. (Os01t0191500-01)	54196.9	R-ELTSLATPGK-V	000000000000	401	410	508.789	2	8.22148	0.00853337	9
AK101856	Os01g0191500	Similar to Mitochondrial processing peptidase. (Os01t0191500-01)	54196.9	R-ELTSLATPGKVDQTQLDR-A	00000000000000000000	401	418	986.526	2	5.58779	0.00863677	9
AK101856	Os01g0191500	Similar to Mitochondrial processing peptidase. (Os01t0191500-01)	54196.9	K-SAILMNLESK-A	000000000000	425	434	553.303	2	6.57325	0.000290041	9
AK101856	Os01g0191500	Similar to Mitochondrial processing peptidase. (Os01t0191500-01)	54196.9	K-SAILMNLESK-A	000003000000	425	434	561.3	2	5.14431	0.00120414	9
AK101856	Os01g0191500	Similar to Mitochondrial processing peptidase. (Os01t0191500-01)	54196.9	K-AVDGVTLKDITALAEK-I	000000000000000000	460	475	822.469	2	5.28227	0.00634279	9
AK121093	Os01g0191700	Similar to Pyrophosphate-fructose-6-phosphate 1-phosphotransferase-like protein (Pyrophosphate-dependent phosphofructo-1-kinase-like protein). (Os01t0191700-01)	58514.8	R-GINQVYIIGGDGTQK-G	00000000000000000	215	229	781.913	2	1.40681	0.000656763	3
AK121093	Os01g0191700	Similar to Pyrophosphate-fructose-6-phosphate 1-phosphotransferase-like protein (Pyrophosphate-dependent phosphofructo-1-kinase-like protein). (Os01t0191700-01)	58514.8	K-SFGFDTAVEEAQR-A	000000000000000	264	276	728.842	2	4.88652	2.0532e-08	3
AK121093	Os01g0191700	Similar to Pyrophosphate-fructose-6-phosphate 1-phosphotransferase-like protein (Pyrophosphate-dependent phosphofructo-1-kinase-like protein). (Os01t0191700-01)	58514.8	R-HAYIPFYR-I	0000000000	453	460	533.78	2	5.66432	0.00975735	3
AK070619	Os01g0195500	Translation initiation factor SUI1 domain containing protein. (Os01t0195500-01)	21632.2	M-AAEKPAPVR-V	10000000000	2	10	490.782	2	5.26099	0.00350098	4
AK070619	Os01g0195500	Translation initiation factor SUI1 domain containing protein. (Os01t0195500-01)	21632.2	R-LQGVGISAADGSTSAGDASASK-Q	000000000000000000000000	67	88	975.481	2	6.77153	2.28699e-06	4
AK070619	Os01g0195500	Translation initiation factor SUI1 domain containing protein. (Os01t0195500-01)	21632.2	R-LQGVGISAADGSTSAGDASASKQEEVK-R	00000000000000000000000000000	67	93	855.095	3	8.43415	0.00118396	4
AK070619	Os01g0195500	Translation initiation factor SUI1 domain containing protein. (Os01t0195500-01)	21632.2	K-KFATGASVVK-G	000000000000	144	153	504.301	2	6.06483	0.039204	4
U25430	Os01g0196600	Similar to 260 kDa major acidic fibroblast growth factor-stimulated phosphoprotein (Fragment). (Os01t0196600-01)	52449.5	R-MYLKEDLPSR-L	000000000000	370	379	626.327	2	5.39175	0.000537872	1
AK068172	Os01g0199900	Similar to Phosphoribosylaminoimidazole carboxylase catalytic subunit (EC 4.1.1.21) (AIR carboxylase) (AIRC). (Os01t0199900-01)	69027.6	K-GIPVATVAIGNAENAGLLAVR-M	00000000000000000000000	564	584	1003.58	2	7.50513	5.5633e-07	1
AK067763	Os01g0205500	Similar to 60S ribosomal protein L11-2 (L16). Splice isoform 2. (Os01t0205500-01)	21020.1	K-LVLNISVGESGDR-L	000000000000000	19	31	679.871	2	6.05188	5.60127e-08	11
AK067763	Os01g0205500	Similar to 60S ribosomal protein L11-2 (L16). Splice isoform 2. (Os01t0205500-01)	21020.1	K-LVLNISVGESGDRLTR-A	000000000000000000	19	34	576.995	3	5.34609	7.59194e-05	11
AK067763	Os01g0205500	Similar to 60S ribosomal protein L11-2 (L16). Splice isoform 2. (Os01t0205500-01)	21020.1	K-VLEQLSGQSPVFSK-A	0000000000000000	38	51	759.918	2	8.41406	0.00450818	11
AK067763	Os01g0205500	Similar to 60S ribosomal protein L11-2 (L16). Splice isoform 2. (Os01t0205500-01)	21020.1	K-IACYVTVRGEK-A	0000000000000	67	77	655.355	2	7.36929	0.0188797	11
AK067763	Os01g0205500	Similar to 60S ribosomal protein L11-2 (L16). Splice isoform 2. (Os01t0205500-01)	21020.1	R-GEKAMQLLESGLK-V	000000000000000	75	87	702.385	2	5.15814	0.000865819	11
AK067763	Os01g0205500	Similar to 60S ribosomal protein L11-2 (L16). Splice isoform 2. (Os01t0205500-01)	21020.1	K-AMQLLESGLK-V	000000000000	78	87	545.307	2	8.83631	4.45089e-06	11
AK067763	Os01g0205500	Similar to 60S ribosomal protein L11-2 (L16). Splice isoform 2. (Os01t0205500-01)	21020.1	K-AMQLLESGLK-V	003000000000	78	87	553.303	2	6.45125	0.000555213	11
AK067763	Os01g0205500	Similar to 60S ribosomal protein L11-2 (L16). Splice isoform 2. (Os01t0205500-01)	21020.1	K-VKEYELLR-R	0000000000	88	95	525.306	2	5.6805	0.00559741	11
AK067763	Os01g0205500	Similar to 60S ribosomal protein L11-2 (L16). Splice isoform 2. (Os01t0205500-01)	21020.1	K-YDPSTGIYGMDFYVVLER-A	00000000000000000000	118	135	1063.01	2	7.23983	0.00291011	11
AK067763	Os01g0205500	Similar to 60S ribosomal protein L11-2 (L16). Splice isoform 2. (Os01t0205500-01)	21020.1	K-YEGVILNK-A	0000000000	169	176	468.266	2	4.96299	7.88913e-05	11
AK103145	Os01g0209200	Similar to 14-3-3 protein 7. (Os01t0209200-01)	29070.4	K-DSTLIMQLLR-D	000000300000	216	225	603.336	2	8.09167	0.00110044	2
AK060099	Os01g0210600	Protein of unknown function DUF538 family protein. (Os01t0210600-01), Protein of unknown function DUF538 family protein. (Os01t0210600-02)	18210.5	R-ATGFVWLR-Q	0000000000	53	60	475.27	2	7.41158	0.00136037	1
AK072778	Os01g0222500	Similar to Vacuolar ATP synthase subunit E (EC 3.6.3.14) (V-ATPase E subunit) (Vacuolar proton pump E subunit). (Os01t0222500-01)	26586	K-LQLVEAEK-K	0000000000	42	49	465.27	2	2.50285	0.0255539	2
AK072778	Os01g0222500	Similar to Vacuolar ATP synthase subunit E (EC 3.6.3.14) (V-ATPase E subunit) (Vacuolar proton pump E subunit). (Os01t0222500-01)	26586	R-ELVESVLESAK-N	0000000000000	141	151	602.33	2	5.44884	0.0053586	2
J080301M15	Os01g0225400	Pyruvate/Phosphoenolpyruvate kinase, catalytic core domain containing protein. (Os01t0225400-01)	14731.3	K-IAAADVDGFANALQK-M	00000000000000000	97	111	752.397	2	4.39927	8.75868e-10	2
J080301M15	Os01g0225400	Pyruvate/Phosphoenolpyruvate kinase, catalytic core domain containing protein. (Os01t0225400-01)	14731.3	K-MGLDEAANAAAAAAENAEKDGELPENK--	03000000000000000000000000000	112	138	906.088	3	4.35683	0.00174183	2
AK059314	Os01g0226300	Reticulon family protein. (Os01t0226300-01)	20228.1	K-YEDQIDSYGEK-G	0000000000000	138	148	673.797	2	8.23691	0.000971165	1
AK102301	Os01g0226400	ATPase, AAA-type, core domain containing protein. (Os01t0226400-01)	93645.8	R-VLLTSAAYVHLK-Q	00000000000000	76	87	657.9	2	11.4318	0.00245718	1
AK070320	Os01g0227300	Similar to RAB7D. (Os01t0227300-01)	23548.7	K-VIILGDSGVGK-T	0000000000000	11	21	529.319	2	5.39183	0.0115575	5
AK070320	Os01g0227300	Similar to RAB7D. (Os01t0227300-01)	23548.7	K-TSLMNQYVNK-K	000000000000	22	31	599.304	2	5.68243	0.00257723	5
AK070320	Os01g0227300	Similar to RAB7D. (Os01t0227300-01)	23548.7	K-ATIGADFLTK-E	000000000000	39	48	518.791	2	6.21542	0.000120223	5
AK070320	Os01g0227300	Similar to RAB7D. (Os01t0227300-01)	23548.7	R-LFTLQIWDTAGQER-F	0000000000000000	56	69	839.443	2	11.37	6.21568e-05	5
AK070320	Os01g0227300	Similar to RAB7D. (Os01t0227300-01)	23548.7	R-FQSLGVAFYR-G	000000000000	70	79	594.317	2	4.52032	0.00294275	5
AK107453	Os01g0231700	Similar to 60S acidic ribosomal protein P2-B (CaRP2B). (Os01t0231700-01)	11939.8	M-GVYTFVCR-S	0000000000	2	9	508.257	2	3.67039	0.00556936	5
AK107453	Os01g0231700	Similar to 60S acidic ribosomal protein P2-B (CaRP2B). (Os01t0231700-01)	11939.8	K-QLKGELEASAATPYELQR-R	20000000000000000000	19	36	994.015	2	4.8113	5.43595e-08	5
AK107453	Os01g0231700	Similar to 60S acidic ribosomal protein P2-B (CaRP2B). (Os01t0231700-01)	11939.8	K-QLKGELEASAATPYELQR-R	00000000000000000000	19	36	1002.53	2	6.20929	6.2486e-08	5
AK107453	Os01g0231700	Similar to 60S acidic ribosomal protein P2-B (CaRP2B). (Os01t0231700-01)	11939.8	K-GELEASAATPYELQR-R	00000000000000000	22	36	817.908	2	4.51395	0.000340942	5
AK069972	Os01g0232700	Similar to Histidinol dehydrogenase, chloroplast precursor (EC 1.1.1.23) (HDH). Splice isoform 2. (Os01t0232700-01), Similar to Histidinol dehydrogenase. (Os01t0232700-02)	51102.2	K-VALDDVVVR-V	00000000000	95	103	493.29	2	5.85659	0.00616978	1
AK105595	Os01g0235400	Similar to predicted protein. (Os01t0235400-01), Similar to Importin-alpha re-exporter (Cellular apoptosis susceptibility protein homolog). (Os01t0235400-02)	60328.8	R-FLKEFKDQIPK-A	0000000000000	50	60	696.902	2	5.6701	0.00104471	7
AK105595	Os01g0235400	Similar to predicted protein. (Os01t0235400-01), Similar to Importin-alpha re-exporter (Cellular apoptosis susceptibility protein homolog). (Os01t0235400-02)	60328.8	K-ATALALLPSVIR-F	00000000000000	61	72	612.89	2	4.66315	0.00110139	7
AK105595	Os01g0235400	Similar to predicted protein. (Os01t0235400-01), Similar to Importin-alpha re-exporter (Cellular apoptosis susceptibility protein homolog). (Os01t0235400-02)	60328.8	R-YVAADINPYAQPIVQNLSK-A	000000000000000000000	113	131	1052.57	2	8.08833	0.0129674	7
AK105595	Os01g0235400	Similar to predicted protein. (Os01t0235400-01), Similar to Importin-alpha re-exporter (Cellular apoptosis susceptibility protein homolog). (Os01t0235400-02)	60328.8	R-KIPNELNQEGR-L	0000000000000	285	295	649.35	2	5.81658	0.0139538	7
AK105595	Os01g0235400	Similar to predicted protein. (Os01t0235400-01), Similar to Importin-alpha re-exporter (Cellular apoptosis susceptibility protein homolog). (Os01t0235400-02)	60328.8	R-TDQDGAQQDQNDGADADSQR-T	0000000000000000000000	448	467	1067.93	2	4.67632	0.000440801	7
AK105595	Os01g0235400	Similar to predicted protein. (Os01t0235400-01), Similar to Importin-alpha re-exporter (Cellular apoptosis susceptibility protein homolog). (Os01t0235400-02)	60328.8	R-TSGYSVSFVR-L	000000000000	468	477	551.783	2	4.55071	0.0205376	7
AK105595	Os01g0235400	Similar to predicted protein. (Os01t0235400-01), Similar to Importin-alpha re-exporter (Cellular apoptosis susceptibility protein homolog). (Os01t0235400-02)	60328.8	R-FGPIIEQNVDPANK-G	0000000000000000	514	527	771.407	2	6.80834	0.00287938	7
AK073776	Os01g0238600	Nucleic acid-binding, OB-fold domain containing protein. (Os01t0238600-01)	15243.1	M-STPAAGEKPALR-K	10000000000000	2	13	620.341	2	5.19311	0.000511105	6
AK073776	Os01g0238600	Nucleic acid-binding, OB-fold domain containing protein. (Os01t0238600-01)	15243.1	K-VDQLKPVTSGHTLTVK-V	000000000000000000	20	35	861.997	2	7.22856	0.0286267	6
AK073776	Os01g0238600	Nucleic acid-binding, OB-fold domain containing protein. (Os01t0238600-01)	15243.1	K-VVSATPVPGR-A	000000000000	36	45	491.792	2	8.15691	0.000572851	6
AK073776	Os01g0238600	Nucleic acid-binding, OB-fold domain containing protein. (Os01t0238600-01)	15243.1	R-NEQVDLLKPGATVIMR-N	000000000000000000	77	92	595.334	3	7.19205	0.0021603	6
AK073692	Os01g0242500	D-tyrosyl-tRNA(Tyr) deacylase family protein. (Os01t0242500-01)	19219.8	R-VLSASVEVEGR-V	0000000000000	8	18	573.317	2	10.0581	0.000460061	1
AK072762	Os01g0248400	Similar to Isocitrate dehydrogenase (Fragment). (Os01t0248400-01)	46967	R-HAFGDQYR-A	0000000000	135	142	497.23	2	-1.44601	0.0199359	3
AK072762	Os01g0248400	Similar to Isocitrate dehydrogenase (Fragment). (Os01t0248400-01)	46967	R-TIEAEAAHGTVTR-H	000000000000000	302	314	678.354	2	6.90348	1.02351e-08	3
AK061748	Os01g0249300	Lg106-like family protein. (Os01t0249300-01), Lg106-like family protein. (Os01t0249300-02)	13727.7	R-AYFDSADWALGK-S	00000000000000	61	72	672.322	2	7.99765	0.0269795	2
AK061748	Os01g0249300	Lg106-like family protein. (Os01t0249300-01), Lg106-like family protein. (Os01t0249300-02)	13727.7	K-GPLEALRPK-L	00000000000	83	91	490.8	2	4.80032	0.000749365	2
AK068233	Os01g0253300	Importin alpha-1a subunit. (Os01t0253300-01), Importin alpha-1a subunit. (Os01t0253300-02)	58316.1	R-YKVAVDAEEGRR-R	00000000000000	16	27	696.87	2	7.25386	0.0406866	9
AK068233	Os01g0253300	Importin alpha-1a subunit. (Os01t0253300-01), Importin alpha-1a subunit. (Os01t0253300-02)	58316.1	R-EGLQAQAPVPASAATGVDK-K	000000000000000000000	51	69	905.477	2	7.28566	0.013887	9
AK068233	Os01g0253300	Importin alpha-1a subunit. (Os01t0253300-01), Importin alpha-1a subunit. (Os01t0253300-02)	58316.1	R-SPPIEEVIQSGVVPR-F	00000000000000000	105	119	803.949	2	6.69694	7.49275e-07	9
AK068233	Os01g0253300	Importin alpha-1a subunit. (Os01t0253300-01), Importin alpha-1a subunit. (Os01t0253300-02)	58316.1	R-FVQFLTR-E	000000000	120	126	455.763	2	4.47601	0.00140491	9
AK068233	Os01g0253300	Importin alpha-1a subunit. (Os01t0253300-01), Importin alpha-1a subunit. (Os01t0253300-02)	58316.1	K-VVIDHGAVPIFVK-L	000000000000000	153	165	697.418	2	5.96844	2.73755e-06	9
AK068233	Os01g0253300	Importin alpha-1a subunit. (Os01t0253300-01), Importin alpha-1a subunit. (Os01t0253300-02)	58316.1	K-EAAWAISNATSGGSHDQIK-Y	000000000000000000000	388	406	971.971	2	4.9091	0.000213396	9
AK068233	Os01g0253300	Importin alpha-1a subunit. (Os01t0253300-01), Importin alpha-1a subunit. (Os01t0253300-02)	58316.1	K-IENLQSHDNNEIYEK-A	00000000000000000	470	484	923.441	2	6.97879	0.000583623	9
AK058837	Os01g0253600	Replication factor A protein 3 domain containing protein. (Os01t0253600-01)	11499.8	R-TVVQAQREEGGLLIGQSTDGHQLTIK-G	0000000000000000000000000000	25	50	926.835	3	5.70904	0.00417845	1
AY620417	Os01g0254000	Similar to NTGB2 (Fragment). (Os01t0254000-01)	22001.4	K-ILFLGLDNAGK-T	0000000000000	23	33	580.842	2	8.43	0.00137817	8
AY620417	Os01g0254000	Similar to NTGB2 (Fragment). (Os01t0254000-01)	22001.4	K-TTLLHMLKDER-L	0000000000000	34	44	678.873	2	6.84148	0.00274032	8
AY620417	Os01g0254000	Similar to NTGB2 (Fragment). (Os01t0254000-01)	22001.4	R-LVQHQPTQYPTSEELSIGK-I	000000000000000000000	45	63	1078.06	2	8.77498	0.0168058	8
AY620417	Os01g0254000	Similar to NTGB2 (Fragment). (Os01t0254000-01)	22001.4	K-FKAFDLGGHQIAR-R	000000000000000	66	78	487.269	3	7.9176	0.00190405	8
AY620417	Os01g0254000	Similar to NTGB2 (Fragment). (Os01t0254000-01)	22001.4	K-AFDLGGHQIAR-R	0000000000000	68	78	592.816	2	5.6898	9.2123e-08	8
AY620417	Os01g0254000	Similar to NTGB2 (Fragment). (Os01t0254000-01)	22001.4	K-VDAVVYLVDAADK-E	000000000000000	88	100	689.371	2	6.62778	0.0137864	8
AY620417	Os01g0254000	Similar to NTGB2 (Fragment). (Os01t0254000-01)	22001.4	K-VDAVVYLVDAADKER-F	00000000000000000	88	102	831.942	2	3.64569	4.5965e-05	8
AK107950	Os01g0256400	Similar to Dynein light chain 1 protein DLC-1 (Fragment). (Os01t0256400-01)	14230.1	R-LAGGGGGGAALR-A	00000000000000	9	20	478.77	2	6.05719	0.0494087	1
J013050F24	Os01g0260700	Similar to PUR ALPHA-1. (Os01t0260700-01)	32455.1	R-NVLLEINNEASR-L	00000000000000	118	129	686.369	2	6.36756	0.000429786	3
J013050F24	Os01g0260700	Similar to PUR ALPHA-1. (Os01t0260700-01)	32455.1	R-ISEVAGADR-S	00000000000	246	254	459.241	2	6.5249	0.00305112	3
J013050F24	Os01g0260700	Similar to PUR ALPHA-1. (Os01t0260700-01)	32455.1	R-SSIILPLSGLK-Q	0000000000000	255	265	564.36	2	7.89567	0.00342999	3
AK067217	Os01g0265100	Similar to ADP-ribosylation factor. (Os01t0265100-01)	20754.8	R-ILMVGLDAAGK-T	0000000000000	20	30	544.315	2	4.35869	4.85751e-08	10
AK067217	Os01g0265100	Similar to ADP-ribosylation factor. (Os01t0265100-01)	20754.8	R-ILMVGLDAAGK-T	0003000000000	20	30	552.313	2	5.90878	5.50735e-05	10
AK067217	Os01g0265100	Similar to ADP-ribosylation factor. (Os01t0265100-01)	20754.8	K-NISFTVWDVGGQDK-I	0000000000000000	60	73	783.389	2	7.5384	3.21346e-08	10
AK067217	Os01g0265100	Similar to ADP-ribosylation factor. (Os01t0265100-01)	20754.8	R-HYFQNTQGLIFVVDSNDR-D	00000000000000000000	80	97	1077.03	2	7.25373	0.000306953	10
AK067217	Os01g0265100	Similar to ADP-ribosylation factor. (Os01t0265100-01)	20754.8	R-HYFQNTQGLIFVVDSNDRDR-V	0000000000000000000000	80	99	808.732	3	5.67843	0.0061909	10
AK067217	Os01g0265100	Similar to ADP-ribosylation factor. (Os01t0265100-01)	20754.8	R-MLNEDELR-D	0000000000	110	117	510.248	2	5.79816	0.00111463	10
AK067217	Os01g0265100	Similar to ADP-ribosylation factor. (Os01t0265100-01)	20754.8	R-DAVLLVFANK-Q	000000000000	118	127	545.323	2	7.30026	2.0771e-06	10
AK067217	Os01g0265100	Similar to ADP-ribosylation factor. (Os01t0265100-01)	20754.8	K-QDLPNAMNAAEITDK-L	00000000000000000	128	142	815.896	2	6.81949	0.000425526	10
AK067217	Os01g0265100	Similar to ADP-ribosylation factor. (Os01t0265100-01)	20754.8	K-QDLPNAMNAAEITDK-L	00000003000000000	128	142	823.893	2	6.28055	0.0169324	10
AK111252	Os01g0265700	Conserved hypothetical protein. (Os01t0265700-01)	26185.8	R-GFLAVQQR-R	0000000000	49	56	459.763	2	4.48818	0.00888986	1
AK069749	Os01g0266600	Thioredoxin fold domain containing protein. (Os01t0266600-01)	21002.8	K-AFNVEVAPSDFK-V	00000000000000	176	187	662.336	2	4.65247	1.98971e-05	2
AK069749	Os01g0266600	Thioredoxin fold domain containing protein. (Os01t0266600-01)	21002.8	K-VSGAEVILDQI--	0000000000000	188	198	572.32	2	6.47103	1.94294e-05	2
AK099455	Os01g0267200	Similar to 26S proteasome non-ATPase regulatory subunit 14 (26S proteasome regulatory subunit rpn11). (Os01t0267200-01)	34387.6	R-AVAVVIDPIQSVK-G	000000000000000	138	150	669.907	2	6.36879	0.00162687	3
AK099455	Os01g0267200	Similar to 26S proteasome non-ATPase regulatory subunit 14 (26S proteasome regulatory subunit rpn11). (Os01t0267200-01)	34387.6	K-TNEQTVQEMLNLAIK-Y	00000000000000000	238	252	866.459	2	9.88794	0.00185951	3
AK099455	Os01g0267200	Similar to 26S proteasome non-ATPase regulatory subunit 14 (26S proteasome regulatory subunit rpn11). (Os01t0267200-01)	34387.6	K-AVQEEDELPPEK-L	00000000000000	256	267	692.336	2	1.02479	0.0246142	3
Os01g0267600	Os01g0267600	Sad1/UNC-like, C-terminal domain containing protein. (Os01t0267600-01)	48613	R-VADVEASLAR-A	000000000000	143	152	515.784	2	7.6311	0.00247965	1
J065211C13	Os01g0267900	Similar to Calmodulin NtCaM3 (Calmodulin NtCaM4) (Calmodulin NtCaM5) (Calmodulin NtCaM6) (Calmodulin NtCaM7) (Calmodulin NtCaM8) (Calmodulin NtCaM11) (Calmodulin NtCaM12). (Os01t0267900-01)	16891.9	K-MKDTDSEEELKEAFR-V	00000000000000000	77	91	609.955	3	4.16971	0.000289283	4
J065211C13	Os01g0267900	Similar to Calmodulin NtCaM3 (Calmodulin NtCaM4) (Calmodulin NtCaM5) (Calmodulin NtCaM6) (Calmodulin NtCaM7) (Calmodulin NtCaM8) (Calmodulin NtCaM11) (Calmodulin NtCaM12). (Os01t0267900-01)	16891.9	K-MKDTDSEEELKEAFR-V	03000000000000000	77	91	615.288	3	5.56434	0.00205505	4
J065211C13	Os01g0267900	Similar to Calmodulin NtCaM3 (Calmodulin NtCaM4) (Calmodulin NtCaM5) (Calmodulin NtCaM6) (Calmodulin NtCaM7) (Calmodulin NtCaM8) (Calmodulin NtCaM11) (Calmodulin NtCaM12). (Os01t0267900-01)	16891.9	R-VFDKDQNGFISAAELR-H	000000000000000000	92	107	905.465	2	5.54798	1.34372e-06	4
AK102391	Os01g0268300	Similar to DNA gyrase B subunit. (Os01t0268300-01), Similar to DNA gyrase subunit B, chloroplastic/mitochondrial. (Os01t0268300-02)	80916	R-VAGEYTAANVQVLEALDGVR-T	0000000000000000000000	85	104	1038.05	2	5.97997	6.4627e-09	4
AK102391	Os01g0268300	Similar to DNA gyrase B subunit. (Os01t0268300-01), Similar to DNA gyrase subunit B, chloroplastic/mitochondrial. (Os01t0268300-02)	80916	R-KFQAILPLR-G	00000000000	531	539	543.348	2	4.57718	0.00138372	4
AK102391	Os01g0268300	Similar to DNA gyrase B subunit. (Os01t0268300-01), Similar to DNA gyrase subunit B, chloroplastic/mitochondrial. (Os01t0268300-02)	80916	K-FQAILPLR-G	0000000000	532	539	479.298	2	1.21949	0.0349064	4
AK102391	Os01g0268300	Similar to DNA gyrase B subunit. (Os01t0268300-01), Similar to DNA gyrase subunit B, chloroplastic/mitochondrial. (Os01t0268300-02)	80916	K-VEDAAEANVVFSSLMGTR-V	00000000000000000000	690	707	948.471	2	8.97129	0.0117629	4
AK067610	Os01g0269100	Similar to Rab proteins geranylgeranyltransferase component A 2 (Rab escort protein 2) (REP-2) (Choroideraemia-like protein). (Os01t0269100-01)	34758.3	K-TIALYSSSIGR-F	0000000000000	273	283	584.325	2	5.72541	0.0382985	1
AK119511	Os01g0270100	Similar to Cysteine protease inhibitor. (Os01t0270100-01), Similar to cDNA clone:001-200-C04, full insert sequence. (Os01t0270100-02)	27252.2	R-ENALLEFVR-V	00000000000	78	86	545.801	2	5.41864	0.00605707	2
AK119511	Os01g0270100	Similar to Cysteine protease inhibitor. (Os01t0270100-01), Similar to cDNA clone:001-200-C04, full insert sequence. (Os01t0270100-02)	27252.2	R-NTGDATTFTNADLGAK-K	000000000000000000	135	150	798.883	2	4.83863	5.62691e-06	2
Os01g0271400	Os01g0271400	Peptidase S14, ClpP family protein. (Os01t0271400-00)	32452	R-FQGQATDVDIAR-K	00000000000000	216	227	660.836	2	7.73263	0.0479101	1
J100075O07	Os01g0273000	Similar to 26 proteasome complex subunit DSS1 (Deleted in split hand/split foot protein 1) (Split hand/foot deleted protein 1). (Os01t0273000-01)	8922.84	M-AAAAPADAKAEAAK-M	1000000000000000	2	15	649.344	2	5.0012	0.0374838	1
AK064813	Os01g0275600	Similar to Argonaute 4 protein. (Os01t0275600-01), Similar to Protein argonaute 4A. (Os01t0275600-02)	101783	K-GQPIQLLTNHFK-V	00000000000000	49	60	698.395	2	5.52625	7.14053e-06	12
AK064813	Os01g0275600	Similar to Argonaute 4 protein. (Os01t0275600-01), Similar to Protein argonaute 4A. (Os01t0275600-02)	101783	K-TFKVELNFAAK-I	0000000000000	171	181	634.359	2	5.22023	0.00138839	12
AK064813	Os01g0275600	Similar to Argonaute 4 protein. (Os01t0275600-01), Similar to Protein argonaute 4A. (Os01t0275600-02)	101783	K-IPMSAIAQALR-G	0003000000000	182	192	593.837	2	5.20513	0.00148358	12
AK064813	Os01g0275600	Similar to Argonaute 4 protein. (Os01t0275600-01), Similar to Protein argonaute 4A. (Os01t0275600-02)	101783	K-IPMSAIAQALR-G	0000000000000	182	192	585.841	2	7.28952	0.0376286	12
AK064813	Os01g0275600	Similar to Argonaute 4 protein. (Os01t0275600-01), Similar to Protein argonaute 4A. (Os01t0275600-02)	101783	R-GQESENTQEAIR-V	00000000000000	193	204	681.322	2	4.88096	2.40674e-07	12
AK064813	Os01g0275600	Similar to Argonaute 4 protein. (Os01t0275600-01), Similar to Protein argonaute 4A. (Os01t0275600-02)	101783	R-MSVLSDVLKR-S	000000000000	416	425	574.331	2	4.23275	2.22302e-06	12
AK064813	Os01g0275600	Similar to Argonaute 4 protein. (Os01t0275600-01), Similar to Protein argonaute 4A. (Os01t0275600-02)	101783	R-MSVLSDVLKR-S	030000000000	416	425	582.33	2	6.01292	0.037079	12
AK064813	Os01g0275600	Similar to Argonaute 4 protein. (Os01t0275600-01), Similar to Protein argonaute 4A. (Os01t0275600-02)	101783	K-AGNGEDLFAR-N	000000000000	460	469	525.256	2	2.78817	0.00153047	12
AK064813	Os01g0275600	Similar to Argonaute 4 protein. (Os01t0275600-01), Similar to Protein argonaute 4A. (Os01t0275600-02)	101783	R-VNDQYITNVLLK-I	00000000000000	594	605	710.398	2	2.51338	0.00773981	12
AK064813	Os01g0275600	Similar to Argonaute 4 protein. (Os01t0275600-01), Similar to Protein argonaute 4A. (Os01t0275600-02)	101783	R-KPDQVIIFR-D	00000000000	713	721	558.336	2	6.89191	0.00109541	12
AK058917	Os01g0276000	Similar to 60S ribosomal protein L30. (Os01t0276000-01), Similar to 60S ribosomal protein L30. (Os01t0276000-02)	12639.6	R-KSEIEYYAMLAK-V	00000000000000	57	68	723.375	2	5.98998	0.000182098	3
AK058917	Os01g0276000	Similar to 60S ribosomal protein L30. (Os01t0276000-01), Similar to 60S ribosomal protein L30. (Os01t0276000-02)	12639.6	K-SEIEYYAMLAK-V	0000000000000	58	68	659.326	2	3.70151	2.22851e-08	3
AK058917	Os01g0276000	Similar to 60S ribosomal protein L30. (Os01t0276000-01), Similar to 60S ribosomal protein L30. (Os01t0276000-02)	12639.6	K-SEIEYYAMLAK-V	0000000030000	58	68	667.324	2	4.34722	4.665e-06	3
AK059596	Os01g0276100	Similar to 3-isopropylmalate dehydrogenase, chloroplast precursor (EC 1.1.1.85) (Beta-IPM dehydrogenase) (IMDH) (3-IPM-DH). (Os01t0276100-01)	40056.6	R-ATLFPGDGIGPEIAESVK-Q	00000000000000000000	34	51	900.979	2	7.17053	0.0159061	4
AK059596	Os01g0276100	Similar to 3-isopropylmalate dehydrogenase, chloroplast precursor (EC 1.1.1.85) (Beta-IPM dehydrogenase) (IMDH) (3-IPM-DH). (Os01t0276100-01)	40056.6	K-TRYDDVNLVTIR-E	00000000000000	135	146	732.899	2	6.69192	0.0115526	4
AK059596	Os01g0276100	Similar to 3-isopropylmalate dehydrogenase, chloroplast precursor (EC 1.1.1.85) (Beta-IPM dehydrogenase) (IMDH) (3-IPM-DH). (Os01t0276100-01)	40056.6	R-YDDVNLVTIR-E	000000000000	137	146	604.323	2	5.88841	3.85654e-05	4
AK059596	Os01g0276100	Similar to 3-isopropylmalate dehydrogenase, chloroplast precursor (EC 1.1.1.85) (Beta-IPM dehydrogenase) (IMDH) (3-IPM-DH). (Os01t0276100-01)	40056.6	R-ENTEGEYSGLEHQVVR-G	000000000000000000	147	162	616.291	3	1.0428	0.0440776	4
Os01g0276200	Os01g0276200	Porin, eukaryotic type family protein. (Os01t0276200-00)	36857.2	K-NLSLGTEAFWLGQQR-K	00000000000000000	202	216	860.449	2	6.02011	0.00014439	2
Os01g0276200	Os01g0276200	Porin, eukaryotic type family protein. (Os01t0276200-00)	36857.2	K-IDTNGVVSALLEER-L	0000000000000000	289	302	758.408	2	4.27607	7.14799e-05	2
AK061002	Os01g0276500	Similar to Histidine biosynthesis bifunctional protein hisIE, chloroplast precursor [Includes: Phosphoribosyl-AMP cyclohydrolase (EC 3.5.4.19) (PRA-CH); Phosphoribosyl-ATP pyrophosphatase (EC 3.6.1.31) (PRA-PH)]. (Os01t0276500-01)	33215	R-QVVSTLYSLEDTISR-R	00000000000000000	195	209	855.953	2	4.59897	0.00451887	3
AK061002	Os01g0276500	Similar to Histidine biosynthesis bifunctional protein hisIE, chloroplast precursor [Includes: Phosphoribosyl-AMP cyclohydrolase (EC 3.5.4.19) (PRA-CH); Phosphoribosyl-ATP pyrophosphatase (EC 3.6.1.31) (PRA-PH)]. (Os01t0276500-01)	33215	R-MEQVLEVLR-K	00000000000	281	289	558.811	2	5.51797	0.000125584	3
AK061002	Os01g0276500	Similar to Histidine biosynthesis bifunctional protein hisIE, chloroplast precursor [Includes: Phosphoribosyl-AMP cyclohydrolase (EC 3.5.4.19) (PRA-CH); Phosphoribosyl-ATP pyrophosphatase (EC 3.6.1.31) (PRA-PH)]. (Os01t0276500-01)	33215	R-FSQSGIEEK-A	00000000000	292	300	512.753	2	4.77227	0.0175547	3
AK103465	Os01g0276700	Similar to Pyruvate kinase, cytosolic isozyme (EC 2.7.1.40) (PK). (Os01t0276700-01), Similar to Pyruvate kinase, cytosolic isozyme (EC 2.7.1.40) (PK). (Os01t0276700-02), Similar to Pyruvate kinase. (Os01t0276700-03), Similar to Pyruvate kinase. (Os01t0276700-04)	55792.7	K-AALILVLTR-G	00000000000	394	402	485.329	2	5.0883	1.85458e-05	2
AK103465	Os01g0276700	Similar to Pyruvate kinase, cytosolic isozyme (EC 2.7.1.40) (PK). (Os01t0276700-01), Similar to Pyruvate kinase, cytosolic isozyme (EC 2.7.1.40) (PK). (Os01t0276700-02), Similar to Pyruvate kinase. (Os01t0276700-03), Similar to Pyruvate kinase. (Os01t0276700-04)	55792.7	R-GVIPMLSAATAK-A	00000000000000	451	462	579.834	2	5.46363	0.0181692	2
AK103258	Os01g0279200	Similar to COP9 signalosome complex subunit 2. (Os01t0279200-01), Similar to COP9 signalosome complex subunit 2 (Signalosome subunit 2) (FUSCA protein 12) (FUSCA12). (Os01t0279200-02), Similar to COP9 signalosome complex subunit 2. (Os01t0279200-03)	51737	R-IQGHIDQVNK-L	000000000000	394	403	576.317	2	8.15611	0.0458427	1
AK058646	Os01g0279300	Similar to Calmodulin 1 (Fragment). (Os01t0279300-01)	16891.9	K-MKDTDSEEELKEAFR-V	00000000000000000	77	91	609.955	3	4.16971	0.000289283	4
AK058646	Os01g0279300	Similar to Calmodulin 1 (Fragment). (Os01t0279300-01)	16891.9	K-MKDTDSEEELKEAFR-V	03000000000000000	77	91	615.288	3	5.56434	0.00205505	4
AK058646	Os01g0279300	Similar to Calmodulin 1 (Fragment). (Os01t0279300-01)	16891.9	R-VFDKDQNGFISAAELR-H	000000000000000000	92	107	905.465	2	5.54798	1.34372e-06	4
J090096C15	Os01g0280400	DNA-binding protein. (Os01t0280400-00)	49234.6	K-LYSDAGEVEK-A	000000000000	308	317	555.772	2	5.25395	0.0143084	3
J090096C15	Os01g0280400	DNA-binding protein. (Os01t0280400-00)	49234.6	R-MKADDIFPNR-A	000000000000	394	403	603.803	2	4.25221	0.000169058	3
J090096C15	Os01g0280400	DNA-binding protein. (Os01t0280400-00)	49234.6	R-AVASLLAATDPFNRK-N	00000000000000000	404	418	787.442	2	4.90322	3.91303e-05	3
AK122127	Os01g0282800	Similar to Tubulin beta-5 chain (Beta-5 tubulin). (Os01t0282800-01), Similar to Tubulin beta-5 chain (Beta-5 tubulin). (Os01t0282800-02)	51105.3	K-GHYTEGAELIDSVLDVVR-K	00000000000000000000	104	121	658.342	3	6.96649	0.046161	12
AK122127	Os01g0282800	Similar to Tubulin beta-5 chain (Beta-5 tubulin). (Os01t0282800-01), Similar to Tubulin beta-5 chain (Beta-5 tubulin). (Os01t0282800-02)	51105.3	R-KLAVNLIPFPR-L	0000000000000	252	262	634.404	2	10.312	0.00943005	12
AK122127	Os01g0282800	Similar to Tubulin beta-5 chain (Beta-5 tubulin). (Os01t0282800-01), Similar to Tubulin beta-5 chain (Beta-5 tubulin). (Os01t0282800-02)	51105.3	K-LAVNLIPFPR-L	000000000000	253	262	570.352	2	2.68168	3.47098e-05	12
AK122127	Os01g0282800	Similar to Tubulin beta-5 chain (Beta-5 tubulin). (Os01t0282800-01), Similar to Tubulin beta-5 chain (Beta-5 tubulin). (Os01t0282800-02)	51105.3	R-LHFFMVGFAPLTSR-G	0000030000000000	263	276	819.929	2	2.60449	3.57288e-06	12
AK122127	Os01g0282800	Similar to Tubulin beta-5 chain (Beta-5 tubulin). (Os01t0282800-01), Similar to Tubulin beta-5 chain (Beta-5 tubulin). (Os01t0282800-02)	51105.3	R-LHFFMVGFAPLTSR-G	0000000000000000	263	276	811.936	2	8.67679	0.0109113	12
AK122127	Os01g0282800	Similar to Tubulin beta-5 chain (Beta-5 tubulin). (Os01t0282800-01), Similar to Tubulin beta-5 chain (Beta-5 tubulin). (Os01t0282800-02)	51105.3	R-YLTASAMFR-G	00000000000	310	318	530.271	2	5.13605	6.13077e-05	12
AK122127	Os01g0282800	Similar to Tubulin beta-5 chain (Beta-5 tubulin). (Os01t0282800-01), Similar to Tubulin beta-5 chain (Beta-5 tubulin). (Os01t0282800-02)	51105.3	K-EVDEQMINVQNK-N	00000000000000	325	336	723.85	2	1.82773	0.0011133	12
AK122127	Os01g0282800	Similar to Tubulin beta-5 chain (Beta-5 tubulin). (Os01t0282800-01), Similar to Tubulin beta-5 chain (Beta-5 tubulin). (Os01t0282800-02)	51105.3	K-EVDEQMINVQNK-N	00000030000000	325	336	731.849	2	4.02201	0.0044319	12
AK122127	Os01g0282800	Similar to Tubulin beta-5 chain (Beta-5 tubulin). (Os01t0282800-01), Similar to Tubulin beta-5 chain (Beta-5 tubulin). (Os01t0282800-02)	51105.3	K-NSSYFVEWIPNNVK-S	0000000000000000	337	350	848.924	2	4.60289	0.00267324	12
AK122127	Os01g0282800	Similar to Tubulin beta-5 chain (Beta-5 tubulin). (Os01t0282800-01), Similar to Tubulin beta-5 chain (Beta-5 tubulin). (Os01t0282800-02)	51105.3	R-RVSEQFTAMFR-R	0000000000000	380	390	686.349	2	4.3491	0.00425129	12
AK122127	Os01g0282800	Similar to Tubulin beta-5 chain (Beta-5 tubulin). (Os01t0282800-01), Similar to Tubulin beta-5 chain (Beta-5 tubulin). (Os01t0282800-02)	51105.3	R-VSEQFTAMFR-R	000000000000	381	390	608.298	2	4.92686	2.78662e-07	12
AK122127	Os01g0282800	Similar to Tubulin beta-5 chain (Beta-5 tubulin). (Os01t0282800-01), Similar to Tubulin beta-5 chain (Beta-5 tubulin). (Os01t0282800-02)	51105.3	R-VSEQFTAMFR-R	000000003000	381	390	616.297	2	6.7143	7.11268e-05	12
AK071713	Os01g0283100	Similar to Ferripyochelin-binding protein-like. (Os01t0283100-01), Similar to Ferripyochelin-binding protein-like. (Os01t0283100-02)	28735.5	R-KLTDDEITFIK-E	0000000000000	191	201	661.868	2	7.15172	4.52606e-05	3
AK071713	Os01g0283100	Similar to Ferripyochelin-binding protein-like. (Os01t0283100-01), Similar to Ferripyochelin-binding protein-like. (Os01t0283100-02)	28735.5	K-ESASNYSTLAK-A	0000000000000	202	212	585.788	2	4.97791	0.000813624	3
AK071713	Os01g0283100	Similar to Ferripyochelin-binding protein-like. (Os01t0283100-01), Similar to Ferripyochelin-binding protein-like. (Os01t0283100-02)	28735.5	K-SAHQDEEHDSMIGATR-E	000000000000000000	235	250	595.264	3	6.26221	0.0492298	3
J065045I15	Os01g0293000	Similar to S-adenosylmethionine synthetase 1 (EC 2.5.1.6) (Methionine adenosyltransferase 1) (AdoMet synthetase 1) (Fragment). (Os01t0293000-01)	43850.9	R-VHTVLISTQHDETVTNDEIAADLK-E	00000000000000000000000000	191	214	883.788	3	4.4528	0.000191353	4
J065045I15	Os01g0293000	Similar to S-adenosylmethionine synthetase 1 (EC 2.5.1.6) (Methionine adenosyltransferase 1) (AdoMet synthetase 1) (Fragment). (Os01t0293000-01)	43850.9	R-FVIGGPHGDAGLTGR-K	00000000000000000	241	255	727.385	2	5.55208	7.29211e-07	4
J065045I15	Os01g0293000	Similar to S-adenosylmethionine synthetase 1 (EC 2.5.1.6) (Methionine adenosyltransferase 1) (AdoMet synthetase 1) (Fragment). (Os01t0293000-01)	43850.9	R-KIIIDTYGGWGAHGGGAFSGK-D	00000000000000000000000	256	276	698.029	3	5.50837	0.00325039	4
J065045I15	Os01g0293000	Similar to S-adenosylmethionine synthetase 1 (EC 2.5.1.6) (Methionine adenosyltransferase 1) (AdoMet synthetase 1) (Fragment). (Os01t0293000-01)	43850.9	K-TAAYGHFGR-E	00000000000	368	376	490.244	2	5.51257	3.02874e-05	4
AK070568	Os01g0300200	Similar to ATP-citrate lyase subunit B. (Os01t0300200-01), Similar to ATP-citrate lyase subunit B. (Os01t0300200-02), Similar to ACLB-1 (ATP-citrate lyase B-1). (Os01t0300200-03)	66667.4	R-VVAIIAEGVPESDTK-Q	00000000000000000	106	120	764.421	2	5.5892	0.0191454	2
AK070568	Os01g0300200	Similar to ATP-citrate lyase subunit B. (Os01t0300200-01), Similar to ATP-citrate lyase subunit B. (Os01t0300200-02), Similar to ACLB-1 (ATP-citrate lyase B-1). (Os01t0300200-03)	66667.4	K-VIIGPATVGGIQAGAFK-I	0000000000000000000	132	148	799.967	2	-0.163132	1.10004e-05	2
AK058273	Os01g0300600	Carbohydrate-binding-like fold domain containing protein. (Os01t0300600-01)	43021.1	K-FTPSAVAIDLNSGESR-E	000000000000000000	108	123	832.423	2	6.42942	0.00258601	1
AK062385	Os01g0305200	Lg106-like family protein. (Os01t0305200-01)	9859.9	R-AYFDSADWALGK-Q	00000000000000	40	51	672.322	2	7.99765	0.0269795	1
AK073419	Os01g0314300	Uncharacterized domain 2 containing protein. (Os01t0314300-01), Uncharacterized domain 2 containing protein. (Os01t0314300-02)	20474.6	K-KFSFEDISAQNQVK-A	0000000000000000	4	17	820.92	2	3.46928	0.0141355	3
AK073419	Os01g0314300	Uncharacterized domain 2 containing protein. (Os01t0314300-01), Uncharacterized domain 2 containing protein. (Os01t0314300-02)	20474.6	R-LLHQYPDIMK-K	000000000000	83	92	629.34	2	4.81536	0.0410367	3
AK073419	Os01g0314300	Uncharacterized domain 2 containing protein. (Os01t0314300-01), Uncharacterized domain 2 containing protein. (Os01t0314300-02)	20474.6	K-QHALAIGYTK-M	200000000000	140	149	542.797	2	6.94459	0.00041176	3
AK101168	Os01g0315800	UDP-glucuronic acid decarboxylase (EC 4.1.1.35). (Os01t0315800-01), Similar to DTDP-glucose 4-6-dehydratase-like protein (Fragment). (Os01t0315800-02)	46630	R-IFNTYGPR-M	0000000000	282	289	484.256	2	4.70619	0.00197966	1
Os01g0317500	Os01g0317500	0	10158.2	R-LTAEEFYAR-H	00000000000	17	25	550.279	2	7.74335	0.0212028	1
AK105905	Os01g0317800	Alpha/beta hydrolase family protein. (Os01t0317800-01)	36263.5	R-LTAEEFYAR-H	00000000000	17	25	550.279	2	7.74335	0.0212028	1
AK064712	Os01g0321800	Gas vesicle protein GvpC repeat containing protein. (Os01t0321800-01)	23271.8	K-NVIISVKPQAK-K	0000000000000	150	160	598.874	2	4.3014	0.0282616	1
AK061988	Os01g0328400	Ubiquitin. (Os01t0328400-01)	17941.5	K-TITLEVESSDTIDNVK-A	000000000000000000	12	27	882.453	2	4.7096	0.000135223	18
AK061988	Os01g0328400	Ubiquitin. (Os01t0328400-01)	17941.5	K-TITLEVESSDTIDNVKAK-I	00000000000000000000	12	29	982.02	2	4.8609	0.00530036	18
AK061988	Os01g0328400	Ubiquitin. (Os01t0328400-01)	17941.5	K-IQDKEGIPPDQQR-L	000000000000000	30	42	762.398	2	4.44125	7.75015e-05	18
AK061988	Os01g0328400	Ubiquitin. (Os01t0328400-01)	17941.5	K-QLEDGRTLADYNIQK-E	20000000000000000	49	63	873.943	2	7.73162	0.0331479	18
AK061988	Os01g0328400	Ubiquitin. (Os01t0328400-01)	17941.5	R-TLADYNIQK-E	00000000000	55	63	533.286	2	6.0071	0.0437177	18
AK061988	Os01g0328400	Ubiquitin. (Os01t0328400-01)	17941.5	R-TLADYNIQKESTLHLVLR-L	00000000000000000000	55	72	705.396	3	5.64222	2.10065e-05	18
AK061988	Os01g0328400	Ubiquitin. (Os01t0328400-01)	17941.5	K-ESTLHLVLR-L	00000000000	64	72	534.318	2	7.43752	1.78151e-05	18
AK066632	Os01g0328700	FAD-dependent pyridine nucleotide-disulphide oxidoreductase domain containing protein. (Os01t0328700-01)	53107	K-LASPSEVSVDLSDGGSTVVK-G	0000000000000000000000	153	172	974.005	2	5.72482	2.16894e-05	12
AK066632	Os01g0328700	FAD-dependent pyridine nucleotide-disulphide oxidoreductase domain containing protein. (Os01t0328700-01)	53107	K-GKNIIIATGSDVK-S	000000000000000	173	185	658.386	2	4.72823	6.76784e-05	12
AK066632	Os01g0328700	FAD-dependent pyridine nucleotide-disulphide oxidoreductase domain containing protein. (Os01t0328700-01)	53107	K-NIIIATGSDVK-S	0000000000000	175	185	565.829	2	8.38681	3.62975e-05	12
AK066632	Os01g0328700	FAD-dependent pyridine nucleotide-disulphide oxidoreductase domain containing protein. (Os01t0328700-01)	53107	K-SLPGVTIDEKK-I	0000000000000	186	196	593.842	2	7.50705	0.00429809	12
AK066632	Os01g0328700	FAD-dependent pyridine nucleotide-disulphide oxidoreductase domain containing protein. (Os01t0328700-01)	53107	K-VVGVDTSGDGVK-L	00000000000000	274	285	566.798	2	3.15721	0.00116382	12
AK066632	Os01g0328700	FAD-dependent pyridine nucleotide-disulphide oxidoreductase domain containing protein. (Os01t0328700-01)	53107	R-VPYTAGIGLESVGVETDK-A	00000000000000000000	311	328	917.979	2	3.52296	2.07005e-10	12
AK066632	Os01g0328700	FAD-dependent pyridine nucleotide-disulphide oxidoreductase domain containing protein. (Os01t0328700-01)	53107	R-VPYTAGIGLESVGVETDKAGR-I	00000000000000000000000	311	331	1060.06	2	5.91711	4.38678e-09	12
AK066632	Os01g0328700	FAD-dependent pyridine nucleotide-disulphide oxidoreductase domain containing protein. (Os01t0328700-01)	53107	R-VGKFPLLANSR-A	0000000000000	413	423	601.36	2	6.37887	0.00799065	12
AK066632	Os01g0328700	FAD-dependent pyridine nucleotide-disulphide oxidoreductase domain containing protein. (Os01t0328700-01)	53107	K-FPLLANSR-A	0000000000	416	423	459.267	2	7.31274	0.0216088	12
AK066632	Os01g0328700	FAD-dependent pyridine nucleotide-disulphide oxidoreductase domain containing protein. (Os01t0328700-01)	53107	R-AKAIDDAEGLVK-V	00000000000000	424	435	615.344	2	6.30379	0.00131589	12
AK066632	Os01g0328700	FAD-dependent pyridine nucleotide-disulphide oxidoreductase domain containing protein. (Os01t0328700-01)	53107	K-AIDDAEGLVK-V	000000000000	426	435	515.777	2	4.3071	0.000246804	12
AY333187	Os01g0337500	Similar to H+-pyrophosphatase (Fragment). (Os01t0337500-00)	80416.4	K-AADVGADLVGKVER-N	0000000000000000	260	273	700.384	2	5.31066	1.18587e-07	3
AY333187	Os01g0337500	Similar to H+-pyrophosphatase (Fragment). (Os01t0337500-00)	80416.4	R-TDALDAAGNTTAAIGK-G	000000000000000000	535	550	745.381	2	4.05095	0.0262486	3
AK120645	Os01g0337900	Similar to Dihydrolipoamide dehydrogenase. (Os01t0337900-01)	59164	R-QAVADHANNLASK-I	200000000000000	154	166	661.332	2	4.77521	0.000751625	3
AK120645	Os01g0337900	Similar to Dihydrolipoamide dehydrogenase. (Os01t0337900-01)	59164	K-ALGVDILTGFGTIVGK-Q	000000000000000000	177	192	780.958	2	6.01121	0.000635463	3
AK120645	Os01g0337900	Similar to Dihydrolipoamide dehydrogenase. (Os01t0337900-01)	59164	K-TKEHKETLEVDAALIATGR-A	000000000000000000000	332	350	694.716	3	6.53649	0.00588519	3
AK120645	Os01g0337900	Similar to Dihydrolipoamide dehydrogenase. (Os01t0337900-01)	59164	K-ALAENEGDGLAK-M	00000000000000	473	484	594.302	2	5.26752	0.00599151	3
AK103351	Os01g0338000	Similar to GTP-binding protein SAR1A. (Os01t0338000-01), Similar to GTP-binding protein SAR1A. (Os01t0338000-02)	22041.5	K-ILFLGLDNAGK-T	0000000000000	23	33	580.842	2	8.43	0.00137817	7
AK103351	Os01g0338000	Similar to GTP-binding protein SAR1A. (Os01t0338000-01), Similar to GTP-binding protein SAR1A. (Os01t0338000-02)	22041.5	K-TTLLHMLKDER-L	0000000000000	34	44	678.873	2	6.84148	0.00274032	7
AK103351	Os01g0338000	Similar to GTP-binding protein SAR1A. (Os01t0338000-01), Similar to GTP-binding protein SAR1A. (Os01t0338000-02)	22041.5	K-FKAFDLGGHQIAR-R	000000000000000	66	78	487.269	3	7.9176	0.00190405	7
AK103351	Os01g0338000	Similar to GTP-binding protein SAR1A. (Os01t0338000-01), Similar to GTP-binding protein SAR1A. (Os01t0338000-02)	22041.5	K-AFDLGGHQIAR-R	0000000000000	68	78	592.816	2	5.6898	9.2123e-08	7
AK103351	Os01g0338000	Similar to GTP-binding protein SAR1A. (Os01t0338000-01), Similar to GTP-binding protein SAR1A. (Os01t0338000-02)	22041.5	K-VDAVVYLVDAYDK-E	000000000000000	88	100	735.384	2	6.23008	1.47384e-05	7
AK103351	Os01g0338000	Similar to GTP-binding protein SAR1A. (Os01t0338000-01), Similar to GTP-binding protein SAR1A. (Os01t0338000-02)	22041.5	K-VDAVVYLVDAYDKER-F	00000000000000000	88	102	877.956	2	5.4849	1.52579e-07	7
AK066580	Os01g0338600	Conserved hypothetical protein. (Os01t0338600-01)	31582.2	R-GTATVATPEYK-S	0000000000000	111	121	569.297	2	7.11228	0.0048046	1
AK066111	Os01g0339900	Thioredoxin domain 2 containing protein. (Os01t0339900-01)	41212.2	R-SAEALAEFVNTEGGTNVK-L	00000000000000000000	130	147	918.957	2	5.05029	1.28636e-07	3
AK066111	Os01g0339900	Thioredoxin domain 2 containing protein. (Os01t0339900-01)	41212.2	K-YGVSGYPTLK-F	000000000000	223	232	542.79	2	4.13512	0.00711362	3
AK066111	Os01g0339900	Thioredoxin domain 2 containing protein. (Os01t0339900-01)	41212.2	K-EFLGAANDKR-K	000000000000	287	296	560.792	2	1.4114	0.0305324	3
Os01g0343900	Os01g0343900	0	76550.9	K-KMSELAKK-N	0000000000	32	39	467.774	2	1.06355	0.0272516	1
AK120842	Os01g0348700	Similar to 60S ribosomal protein L23a (L25). (Os01t0348700-01)	17039.7	R-NKLDQYQILK-Y	000000000000	65	74	631.862	2	5.57479	0.00482316	3
AK120842	Os01g0348700	Similar to 60S ribosomal protein L23a (L25). (Os01t0348700-01)	17039.7	K-LDQYQILK-Y	0000000000	67	74	510.794	2	7.61854	0.0411498	3
AK120842	Os01g0348700	Similar to 60S ribosomal protein L23a (L25). (Os01t0348700-01)	17039.7	K-YPLTTESAMK-K	000000000000	75	84	570.788	2	7.87507	0.0278362	3
AK120842	Os01g0348700	Similar to 60S ribosomal protein L23a (L25). (Os01t0348700-01)	17039.7	K-KVNTLIRPDGK-K	0000000000000	119	129	620.876	2	5.83369	0.00951199	3
AK061826	Os01g0358400	Similar to 40S ribosomal protein S4. (Os01t0358400-01)	29931.3	R-EVISILMQR-H	00000000000	60	68	544.812	2	2.79546	0.0455436	5
AK061826	Os01g0358400	Similar to 40S ribosomal protein S4. (Os01t0358400-01)	29931.3	K-GIPYLNTYDGR-T	0000000000000	135	145	634.82	2	4.45638	0.0102028	5
AK061826	Os01g0358400	Similar to 40S ribosomal protein S4. (Os01t0358400-01)	29931.3	K-FDVGNVVMVTGGR-N	000000000000000	175	187	675.849	2	5.90368	1.71068e-05	5
AK061826	Os01g0358400	Similar to 40S ribosomal protein S4. (Os01t0358400-01)	29931.3	R-LGNVFTIGK-G	00000000000	222	230	474.782	2	6.07226	0.00012282	5
AK061826	Os01g0358400	Similar to 40S ribosomal protein S4. (Os01t0358400-01)	29931.3	K-GNKPWVSLPK-G	000000000000	231	240	563.328	2	6.5255	0.0353562	5
AK061826	Os01g0358400	Similar to 40S ribosomal protein S4. (Os01t0358400-01)	29931.3	R-KRDAAAQAAANA--	00000000000000	254	265	579.302	2	-3.80199	0.0469509	5
AK069339	Os01g0360600	Dephospho-CoA kinase family protein. (Os01t0360600-01)	25868.9	R-LGQIVFSDPEKR-Q	00000000000000	69	80	694.882	2	2.62778	0.0296009	1
AK120610	Os01g0363900	Similar to HASTY. (Os01t0363900-01)	134052	R-VSSDTPAAGNSASTGGGSTER-E	00000000000000000000000	386	406	954.933	2	3.31175	0.0134983	1
AK063804	Os01g0367400	Conserved hypothetical protein. (Os01t0367400-01), Similar to cDNA clone:001-121-G01, full insert sequence. (Os01t0367400-02)	31534.9	R-QEIMDLVNR-S	00000000000	232	240	559.29	2	5.08234	0.0117856	1
AK073477	Os01g0369200	Similar to Cullin-1. (Os01t0369200-01)	87631.9	R-DLVFDKLK-S	0000000000	142	149	489.291	2	7.52314	0.0316099	7
AK073477	Os01g0369200	Similar to Cullin-1. (Os01t0369200-01)	87631.9	R-VANYLHSTTEPK-L	00000000000000	239	250	680.352	2	4.9783	0.0194949	7
AK073477	Os01g0369200	Similar to Cullin-1. (Os01t0369200-01)	87631.9	R-ITDGLLPVSK-I	000000000000	297	306	521.814	2	5.74726	0.0180372	7
AK073477	Os01g0369200	Similar to Cullin-1. (Os01t0369200-01)	87631.9	K-GVVVGLPEQDFVR-S	000000000000000	336	348	707.892	2	5.72545	0.000404089	7
AK073477	Os01g0369200	Similar to Cullin-1. (Os01t0369200-01)	87631.9	K-LSDEAIDESLEK-V	00000000000000	412	423	674.831	2	4.85307	1.6737e-05	7
AK073477	Os01g0369200	Similar to Cullin-1. (Os01t0369200-01)	87631.9	R-FAIDASLVR-I	00000000000	679	687	496.284	2	3.59472	0.00109549	7
AK073477	Os01g0369200	Similar to Cullin-1. (Os01t0369200-01)	87631.9	R-RIEDLISR-E	0000000000	722	729	501.292	2	2.96733	0.00340716	7
AK058900	Os01g0371200	Similar to Glutathione-S-transferase 19E50. (Os01t0371200-01)	25049.7	K-KVLEVYEAR-L	00000000000	145	153	553.817	2	6.60777	0.00514402	1
AK101893	Os01g0372700	Similar to Asparaginyl-tRNA synthetase, cytoplasmic 1 (EC 6.1.1.22) (Asparagine-- tRNA ligase 1) (AsnRS 1). (Os01t0372700-01)	63046.4	R-VIEVGEVDPAAYPLPK-T	000000000000000000	119	134	848.967	2	6.96317	0.00473183	10
AK101893	Os01g0372700	Similar to Asparaginyl-tRNA synthetase, cytoplasmic 1 (EC 6.1.1.22) (Asparagine-- tRNA ligase 1) (AsnRS 1). (Os01t0372700-01)	63046.4	K-TKLTLENLR-D	00000000000	135	143	544.33	2	4.87664	0.00581726	10
AK101893	Os01g0372700	Similar to Asparaginyl-tRNA synthetase, cytoplasmic 1 (EC 6.1.1.22) (Asparagine-- tRNA ligase 1) (AsnRS 1). (Os01t0372700-01)	63046.4	R-SRTNTIGAVAR-I	0000000000000	150	160	573.325	2	4.00471	0.0452005	10
AK101893	Os01g0372700	Similar to Asparaginyl-tRNA synthetase, cytoplasmic 1 (EC 6.1.1.22) (Asparagine-- tRNA ligase 1) (AsnRS 1). (Os01t0372700-01)	63046.4	R-VVVKEKGDAVAQLK-A	0000000000000000	230	243	495.302	3	4.78765	0.00908991	10
AK101893	Os01g0372700	Similar to Asparaginyl-tRNA synthetase, cytoplasmic 1 (EC 6.1.1.22) (Asparagine-- tRNA ligase 1) (AsnRS 1). (Os01t0372700-01)	63046.4	K-QEITAAVAELNK-A	00000000000000	250	261	643.854	2	4.2432	0.00333862	10
AK101893	Os01g0372700	Similar to Asparaginyl-tRNA synthetase, cytoplasmic 1 (EC 6.1.1.22) (Asparagine-- tRNA ligase 1) (AsnRS 1). (Os01t0372700-01)	63046.4	R-LELVSSTPFQR-I	0000000000000	392	402	638.852	2	4.90803	0.0037006	10
AK101893	Os01g0372700	Similar to Asparaginyl-tRNA synthetase, cytoplasmic 1 (EC 6.1.1.22) (Asparagine-- tRNA ligase 1) (AsnRS 1). (Os01t0372700-01)	63046.4	K-TVAAMDVLVPK-V	0000000000000	469	479	572.33	2	7.99888	0.030362	10
AK101893	Os01g0372700	Similar to Asparaginyl-tRNA synthetase, cytoplasmic 1 (EC 6.1.1.22) (Asparagine-- tRNA ligase 1) (AsnRS 1). (Os01t0372700-01)	63046.4	K-VGELVGGSQREER-L	000000000000000	480	492	708.369	2	4.44825	0.00161035	10
AK101893	Os01g0372700	Similar to Asparaginyl-tRNA synthetase, cytoplasmic 1 (EC 6.1.1.22) (Asparagine-- tRNA ligase 1) (AsnRS 1). (Os01t0372700-01)	63046.4	K-HSGFGLGFER-M	000000000000	524	533	553.774	2	3.07526	0.00172125	10
AK101893	Os01g0372700	Similar to Asparaginyl-tRNA synthetase, cytoplasmic 1 (EC 6.1.1.22) (Asparagine-- tRNA ligase 1) (AsnRS 1). (Os01t0372700-01)	63046.4	R-MILFATGLENIR-D	00000000000000	534	545	689.388	2	9.07109	5.38916e-05	10
AK121501	Os01g0375200	Similar to Dehydroquinate dehydratase/shikimate dehydrogenase precursor (EC 1.1.1.25) (EC 4.2.1.10) (Fragment). (Os01t0375200-01), Similar to shikimate biosynthesis protein aroDE. (Os01t0375200-02), Similar to shikimate biosynthesis protein aroDE. (Os01t0375200-03)	62300.4	K-SIGAINTIIR-R	000000000000	372	381	529.326	2	7.37542	0.0303519	2
AK121501	Os01g0375200	Similar to Dehydroquinate dehydratase/shikimate dehydrogenase precursor (EC 1.1.1.25) (EC 4.2.1.10) (Fragment). (Os01t0375200-01), Similar to shikimate biosynthesis protein aroDE. (Os01t0375200-02), Similar to shikimate biosynthesis protein aroDE. (Os01t0375200-03)	62300.4	K-AVSLAAAVGGHALR-L	0000000000000000	456	469	646.877	2	3.21158	0.000198443	2
Os01g0375500	Os01g0375500	Similar to shikimate biosynthesis protein aroDE. (Os01t0375500-00)	34424.8	K-AVSLAAAVGGHALR-L	0000000000000000	215	228	646.877	2	3.21158	0.000198443	1
AK071525	Os01g0376700	Similar to Sucrose-phosphatase (EC 3.1.3.24). (Os01t0376700-01)	47647.1	K-VSFFVDKK-S	0000000000	130	137	485.276	2	4.45211	0.0498237	5
AK071525	Os01g0376700	Similar to Sucrose-phosphatase (EC 3.1.3.24). (Os01t0376700-01)	47647.1	K-IIYSGGQDLDILPQGAGK-G	00000000000000000000	159	176	922.994	2	2.45722	0.000458807	5
AK071525	Os01g0376700	Similar to Sucrose-phosphatase (EC 3.1.3.24). (Os01t0376700-01)	47647.1	K-GQALAYLLK-K	00000000000	177	185	488.797	2	4.99287	3.10363e-05	5
AK071525	Os01g0376700	Similar to Sucrose-phosphatase (EC 3.1.3.24). (Os01t0376700-01)	47647.1	K-GQALAYLLKK-L	000000000000	177	186	552.845	2	5.54043	0.000322894	5
AK071525	Os01g0376700	Similar to Sucrose-phosphatase (EC 3.1.3.24). (Os01t0376700-01)	47647.1	R-DVGFPYVKEDHIKPTDAVVK-F	0000000000000000000000	269	288	753.07	3	3.72033	0.0212733	5
AK059266	Os01g0377700	Similar to NPL4 family protein. (Os01t0377700-01), NPL4 domain containing protein. (Os01t0377700-02)	45076.4	R-VTVPVPLQR-L	00000000000	35	43	504.816	2	5.37819	0.0444883	4
AK059266	Os01g0377700	Similar to NPL4 family protein. (Os01t0377700-01), NPL4 domain containing protein. (Os01t0377700-02)	45076.4	R-VDAIAHGLGMR-R	0000000000000	199	209	570.305	2	2.94842	3.50531e-06	4
AK059266	Os01g0377700	Similar to NPL4 family protein. (Os01t0377700-01), NPL4 domain containing protein. (Os01t0377700-02)	45076.4	R-VGLVFTQAVGR-K	0000000000000	211	221	573.839	2	7.24245	0.000110813	4
AK059266	Os01g0377700	Similar to NPL4 family protein. (Os01t0377700-01), NPL4 domain containing protein. (Os01t0377700-02)	45076.4	R-GNPVAMSALK-S	000000000000	345	354	494.27	2	3.34534	0.0388445	4
AK099867	Os01g0507300	Protein of unknown function DUF92, transmembrane family protein. (Os01t0507300-01)	30812.5	R-TAVGAALAAVIAAR-A	0000000000000000	12	25	627.884	2	5.86414	5.31361e-06	1
AK069825	Os01g0511300	Proteasome component region PCI domain containing protein. (Os01t0511300-01)	43895	M-ALQYVEAQR-Q	10000000000	2	10	560.297	2	7.4041	4.05481e-05	4
AK069825	Os01g0511300	Proteasome component region PCI domain containing protein. (Os01t0511300-01)	43895	K-LAHFAVIASR-Q	000000000000	74	83	542.819	2	4.24819	0.00910103	4
AK069825	Os01g0511300	Proteasome component region PCI domain containing protein. (Os01t0511300-01)	43895	R-RIDEPVLYVK-M	000000000000	109	118	616.359	2	4.67504	0.0101632	4
AK069825	Os01g0511300	Proteasome component region PCI domain containing protein. (Os01t0511300-01)	43895	K-MQIAAINLEK-G	000000000000	119	128	565.819	2	5.33917	0.00163866	4
AK068877	Os01g0513700	Similar to trafficking protein particle complex subunit 1. (Os01t0513700-01), Sybindin-like protein family protein. (Os01t0513700-02)	20127.5	K-LILITHPR-T	0000000000	124	131	481.812	2	1.26502	0.000364898	1
AK068824	Os01g0528800	Similar to Cinnamyl alcohol dehydrogenase. (Os01t0528800-01)	37366.2	K-AELLDPAVK-G	00000000000	104	112	478.279	2	6.03622	0.000193486	6
AK068824	Os01g0528800	Similar to Cinnamyl alcohol dehydrogenase. (Os01t0528800-01)	37366.2	R-RVIVTSSMAAVAYNGKPR-T	00000000000000000000	128	145	640.69	3	3.87863	5.04854e-06	6
AK068824	Os01g0528800	Similar to Cinnamyl alcohol dehydrogenase. (Os01t0528800-01)	37366.2	R-VIVTSSMAAVAYNGKPR-T	0000000000000000000	129	145	882.484	2	7.22733	5.15542e-08	6
AK068824	Os01g0528800	Similar to Cinnamyl alcohol dehydrogenase. (Os01t0528800-01)	37366.2	K-TLAEEAAWK-F	00000000000	174	182	509.766	2	4.87576	0.0353118	6
AK068824	Os01g0528800	Similar to Cinnamyl alcohol dehydrogenase. (Os01t0528800-01)	37366.2	R-VAHYSELVQIIR-E	00000000000000	262	273	714.406	2	3.5554	0.000636445	6
AK106476	Os01g0530400	Thioredoxin fold domain containing protein. (Os01t0530400-01), Similar to cDNA clone:002-104-C07, full insert sequence. (Os01t0530400-02), Thioredoxin fold domain containing protein. (Os01t0530400-03)	20276.2	R-VAADPDTHQDFQPTTK-S	000000000000000000	55	70	885.925	2	7.12307	0.000829679	2
AK106476	Os01g0530400	Thioredoxin fold domain containing protein. (Os01t0530400-01), Similar to cDNA clone:002-104-C07, full insert sequence. (Os01t0530400-02), Thioredoxin fold domain containing protein. (Os01t0530400-03)	20276.2	R-VLKQYDVPISAR-D	00000000000000	111	122	694.902	2	5.6087	0.0124096	2
AK106208	Os01g0531500	Dienelactone hydrolase domain containing protein. (Os01t0531500-01), Similar to protein usf. (Os01t0531500-02)	30533.4	R-DDTTFDAYVVGK-E	00000000000000	54	65	665.816	2	6.3088	5.00642e-05	6
AK106208	Os01g0531500	Dienelactone hydrolase domain containing protein. (Os01t0531500-01), Similar to protein usf. (Os01t0531500-02)	30533.4	K-NHAVHISQIGEGYR-A	0000000000000000	86	99	527.607	3	7.69513	0.000976242	6
AK106208	Os01g0531500	Dienelactone hydrolase domain containing protein. (Os01t0531500-01), Similar to protein usf. (Os01t0531500-02)	30533.4	R-ALIPDLYR-G	0000000000	100	107	480.782	2	5.57113	0.0318626	6
AK106208	Os01g0531500	Dienelactone hydrolase domain containing protein. (Os01t0531500-01), Similar to protein usf. (Os01t0531500-02)	30533.4	K-AQAPIQAHFGELDSFVGFADVTAAK-S	000000000000000000000000000	190	214	864.108	3	5.71688	0.000172411	6
Os01g0532900	Os01g0532900	0	57410	R-LLFNQAFSR-G	00000000000	471	479	548.305	2	7.44385	0.0139801	1
AK064446	Os01g0533500	Similar to Callose synthase 1 catalytic subunit. (Os01t0533500-01)	65324.2	R-LLFNQAFSR-G	00000000000	533	541	548.305	2	7.44385	0.0139801	1
AK103608	Os01g0534900	Similar to Hv711N16.16 (Fragment). (Os01t0534900-01)	88080.5	R-RPDQFTVLVR-N	000000000000	194	203	615.855	2	5.76678	0.0483679	1
AK067431	Os01g0549700	Similar to RNA helicase (Fragment). (Os01t0549700-01), Similar to cDNA clone:J033114G10, full insert sequence. (Os01t0549700-02), Similar to predicted protein. (Os01t0549700-03)	49333	R-ILVATDLVGR-G	000000000000	346	355	528.827	2	5.75991	1.5383e-08	1
AK122050	Os01g0550000	DEAD-like helicase, N-terminal domain containing protein. (Os01t0550000-01), Similar to spliceosome RNA helicase BAT1. (Os01t0550000-02)	49246	R-ILVATDLVGR-G	000000000000	346	355	528.827	2	5.75991	1.5383e-08	1
AK066233	Os01g0550100	Similar to Ubiquitin-specific protease 6. (Os01t0550100-01), Similar to Ubiquitin-specific protease 6. (Os01t0550100-02)	53629	K-SALLSYSDNVR-G	0000000000000	130	140	612.817	2	4.67839	0.00212234	4
AK066233	Os01g0550100	Similar to Ubiquitin-specific protease 6. (Os01t0550100-01), Similar to Ubiquitin-specific protease 6. (Os01t0550100-02)	53629	R-GNGVDQASHNLTVATR-N	000000000000000000	141	156	820.414	2	3.90291	0.000469761	4
AK066233	Os01g0550100	Similar to Ubiquitin-specific protease 6. (Os01t0550100-01), Similar to Ubiquitin-specific protease 6. (Os01t0550100-02)	53629	K-ELFGIDLVSR-V	000000000000	227	236	574.822	2	4.81019	0.0143376	4
AK066233	Os01g0550100	Similar to Ubiquitin-specific protease 6. (Os01t0550100-01), Similar to Ubiquitin-specific protease 6. (Os01t0550100-02)	53629	R-YLTVQFVR-F	0000000000	303	310	513.293	2	1.37933	0.0123029	4
S66160	Os01g0558600	Ras-related protein RIC1. (Os01t0558600-01)	22746.3	K-LQIWDTAGQER-F	0000000000000	59	69	658.837	2	5.76318	0.000109791	3
S66160	Os01g0558600	Ras-related protein RIC1. (Os01t0558600-01)	22746.3	R-TITSSYYR-G	0000000000	72	79	495.752	2	7.01158	0.0295256	3
AK061456	Os01g0559000	Protein of unknown function DUF1000 family protein. (Os01t0559000-01), Similar to Thioredoxin family Trp26. (Os01t0559000-02)	22854.1	K-VVALNESVAGSVK-S	000000000000000	29	41	636.865	2	6.01147	1.43514e-07	2
AK061456	Os01g0559000	Protein of unknown function DUF1000 family protein. (Os01t0559000-01), Similar to Thioredoxin family Trp26. (Os01t0559000-02)	22854.1	K-SISVVGGADGTSPSR-M	00000000000000000	81	95	695.357	2	7.3473	8.16782e-08	2
AK100223	Os01g0566900	K Homology, type 1, subgroup domain containing protein. (Os01t0566900-01)	35432	R-VFIIGPVQEVR-K	0000000000000	284	294	628.876	2	7.36313	0.0100944	1
AK061023	Os01g0570700	Similar to Carbamoyl-phosphate synthase large chain (EC 6.3.5.5) (Carbamoyl- phosphate synthetase ammonia chain). (Os01t0570700-01)	33888.8	R-ELGFNIIATSGTAK-V	0000000000000000	189	202	711.391	2	8.42574	0.0253002	2
AK061023	Os01g0570700	Similar to Carbamoyl-phosphate synthase large chain (EC 6.3.5.5) (Carbamoyl- phosphate synthetase ammonia chain). (Os01t0570700-01)	33888.8	K-VPIITTVDGAR-A	0000000000000	262	272	571.336	2	6.05948	0.0208493	2
AK111319	Os01g0579800	Conserved hypothetical protein. (Os01t0579800-01)	15891.6	M-ADAGKPDPASPPEAPSAK-K	10000000000000000000	2	19	874.439	2	11.7109	0.0175259	1
AK111319	Os01g0579800	Conserved hypothetical protein. (Os01t0579800-01)	15891.6	K-ALLKEFIR-A	0000000000	130	137	495.315	2	9.23654	0.00493506	1
AK069484	Os01g0582400	Similar to Multidomain cyclophilin type peptidyl-prolyl cis-trans isomerase. (Os01t0582400-01)	57026.9	R-FLKGEAPDEQLTK-E	000000000000000	239	251	738.401	2	13.4405	0.0454652	1
AK067338	Os01g0585700	SIT4 phosphatase-associated protein family protein. (Os01t0585700-01)	49999.9	K-HPATSTEDEQLQNAEGIER-H	000000000000000000000	333	351	709.002	3	5.87116	0.0326907	1
AK069698	Os01g0586600	Similar to AKIN gamma. (Os01t0586600-01)	48340.2	R-NVPVIEPDKPIIK-N	000000000000000	237	249	731.44	2	3.72074	0.00572276	1
AK070745	Os01g0588200	Voltage-dependent anion channel. (Os01t0588200-01)	29944.4	M-APGLYTDIGKK-T	0000000000000	2	12	581.831	2	6.93414	0.0159961	3
AK070745	Os01g0588200	Voltage-dependent anion channel. (Os01t0588200-01)	29944.4	K-SILSLVVPDQR-S	0000000000000	91	101	613.863	2	6.31656	0.0434937	3
AK070745	Os01g0588200	Voltage-dependent anion channel. (Os01t0588200-01)	29944.4	K-SLITISGEVDTK-A	00000000000000	248	259	631.851	2	8.45453	0.000240197	3
AK069151	Os01g0596300	Cyclin-like F-box domain containing protein. (Os01t0596300-01)	53330.7	R-AHQLQIGETIIK-A	00000000000000	295	306	675.895	2	6.05864	0.00156294	1
AK121212	Os01g0600000	Similar to Copia-like retroelement pol polyprotein. (Os01t0600000-01)	14213.4	K-AAQASELVSK-H	000000000000	12	21	502.279	2	7.92588	0.000167377	2
AK121212	Os01g0600000	Similar to Copia-like retroelement pol polyprotein. (Os01t0600000-01)	14213.4	R-GFTITGYKV--	00000000000	114	122	493.272	2	1.42112	0.000219793	2
AK101694	Os01g0600300	Conserved hypothetical protein. (Os01t0600300-01), Conserved hypothetical protein. (Os01t0600300-02)	39654	R-LLITHDAINDAR-S	00000000000000	148	159	676.373	2	3.8943	6.35035e-05	1
AK065107	Os01g0603000	Similar to Nuclear RNA binding protein A. (Os01t0603000-01)	40888.4	K-ALLSLKVEER-K	000000000000	257	266	579.351	2	5.86345	8.43327e-06	3
AK065107	Os01g0603000	Similar to Nuclear RNA binding protein A. (Os01t0603000-01)	40888.4	K-SLSINEFLKPAEGER-Y	00000000000000000	313	327	845.45	2	6.83778	0.00148751	3
AK065107	Os01g0603000	Similar to Nuclear RNA binding protein A. (Os01t0603000-01)	40888.4	R-IEDQAQFPGLAGR-L	000000000000000	363	375	701.363	2	4.42638	0.00575364	3
Os01g0605400	Os01g0605400	0	77010.9	K-KLQKNGLK-K	0000000000	481	488	464.798	2	-4.52777	0.0414306	1
AB015288	Os01g0611100	Similar to GTP-binding nuclear protein Ran-2. (Os01t0611100-01)	25412.8	K-LVIVGDGGTGK-T	0000000000000	16	26	508.296	2	6.39785	6.67049e-06	5
AB015288	Os01g0611100	Similar to GTP-binding nuclear protein Ran-2. (Os01t0611100-01)	25412.8	R-KKNLQYYEVSAK-S	00000000000000	144	155	735.905	2	4.82875	0.00279433	5
AB015288	Os01g0611100	Similar to GTP-binding nuclear protein Ran-2. (Os01t0611100-01)	25412.8	K-KNLQYYEVSAK-S	0000000000000	145	155	671.858	2	6.92333	0.0120741	5
AB015288	Os01g0611100	Similar to GTP-binding nuclear protein Ran-2. (Os01t0611100-01)	25412.8	K-NLQYYEVSAK-S	000000000000	146	155	607.808	2	3.22306	4.43799e-05	5
AB015288	Os01g0611100	Similar to GTP-binding nuclear protein Ran-2. (Os01t0611100-01)	25412.8	K-SNYNFEKPFLYLAR-K	0000000000000000	156	169	587.974	3	7.2095	0.00203938	5
AK071340	Os01g0612200	Cytochrome c oxidase, subunit Vb family protein. (Os01t0612200-01)	18249	K-EAPAVIESYYNK-R	00000000000000	100	111	692.347	2	5.09499	0.000791287	5
AK071340	Os01g0612200	Cytochrome c oxidase, subunit Vb family protein. (Os01t0612200-01)	18249	K-VIGDGGDPDGHDDDDEHHH--	000000000000000000000	151	169	1019.9	2	3.51654	0.00466757	5
AK065278	Os01g0617500	Tetratricopeptide-like helical domain containing protein. (Os01t0617500-01), Similar to predicted protein. (Os01t0617500-02)	104860	K-ILLAFQAVK-Q	00000000000	689	697	501.822	2	1.66693	0.0361388	1
AK100581	Os01g0620900	Conserved hypothetical protein. (Os01t0620900-01)	8761.73	R-DDGSGGDGECWR-R	00000000000000	11	22	662.737	2	-13.8056	0.043451	1
Os01g0624400	Os01g0624400	Similar to Dehydrin. (Os01t0624400-00)	19881.1	R-DDGEGGEEER-R	000000000000	14	23	546.706	2	-2.07241	0.0127671	1
AF192467	Os01g0624500	Similar to Sgt1. (Os01t0624500-01)	41054.6	M-ATAAASDLESK-A	1000000000000	2	12	553.274	2	3.34554	8.8189e-06	7
AF192467	Os01g0624500	Similar to Sgt1. (Os01t0624500-01)	41054.6	K-LGNYTEAVADANK-A	000000000000000	53	65	683.342	2	8.31722	7.22311e-06	7
AF192467	Os01g0624500	Similar to Sgt1. (Os01t0624500-01)	41054.6	K-AIELDPSMHK-A	000000000000	66	75	570.789	2	-0.245274	0.0015539	7
AF192467	Os01g0624500	Similar to Sgt1. (Os01t0624500-01)	41054.6	K-AALELGYSFASGDSR-F	00000000000000000	95	109	772.376	2	3.80191	2.04916e-08	7
AF192467	Os01g0624500	Similar to Sgt1. (Os01t0624500-01)	41054.6	K-SRYQVLSTK-V	00000000000	229	237	541.309	2	9.92501	0.00583915	7
AF192467	Os01g0624500	Similar to Sgt1. (Os01t0624500-01)	41054.6	K-SRYQVLSTKVEIR-L	000000000000000	229	241	526.973	3	5.96235	0.0477796	7
AF192467	Os01g0624500	Similar to Sgt1. (Os01t0624500-01)	41054.6	R-YQVLSTKVEIR-L	0000000000000	231	241	668.391	2	8.98052	6.82046e-05	7
AK071497	Os01g0633100	Similar to ADP-glucose pyrophosphorylase subunit SH2. (Os01t0633100-01)	58461	K-TPFFTSPR-Y	0000000000	376	383	476.751	2	6.14367	0.00214715	1
AK073640	Os01g0639100	Similar to Eukaryotic initiation factor 4A-3 (eIF4A-3) (eIF-4A-3). (Os01t0639100-01)	45995.8	R-GIYAYGFEKPSAIQQR-A	000000000000000000	45	60	914.477	2	4.59552	1.66901e-05	4
AK073640	Os01g0639100	Similar to Eukaryotic initiation factor 4A-3 (eIF4A-3) (eIF-4A-3). (Os01t0639100-01)	45995.8	K-RDELTLEGIK-Q	000000000000	236	245	587.33	2	4.40298	2.54923e-05	4
AK073640	Os01g0639100	Similar to Eukaryotic initiation factor 4A-3 (eIF4A-3) (eIF-4A-3). (Os01t0639100-01)	45995.8	R-KGVAINFVK-K	00000000000	367	375	488.305	2	4.04972	0.0102508	4
AK060890	Os01g0639900	Similar to Carbonic anhydrase, chloroplast precursor (EC 4.2.1.1) (Carbonate dehydratase). (Os01t0639900-01), Non-protein coding transcript. (Os01t0639900-02)	29596	K-FKTEFYDKKPELFEPLK-A	0000000000000000000	85	101	720.39	3	5.60437	0.000693822	6
AK060890	Os01g0639900	Similar to Carbonic anhydrase, chloroplast precursor (EC 4.2.1.1) (Carbonate dehydratase). (Os01t0639900-01), Non-protein coding transcript. (Os01t0639900-02)	29596	K-TEFYDKKPELFEPLK-A	00000000000000000	87	101	628.668	3	5.82607	0.0126742	6
AK060890	Os01g0639900	Similar to Carbonic anhydrase, chloroplast precursor (EC 4.2.1.1) (Carbonate dehydratase). (Os01t0639900-01), Non-protein coding transcript. (Os01t0639900-02)	29596	K-DGAPDSFHFVEDWVR-T	00000000000000000	187	201	888.908	2	5.83469	5.70561e-06	6
AK060890	Os01g0639900	Similar to Carbonic anhydrase, chloroplast precursor (EC 4.2.1.1) (Carbonate dehydratase). (Os01t0639900-01), Non-protein coding transcript. (Os01t0639900-02)	29596	K-EAVNQSLENLK-T	0000000000000	229	239	622.829	2	2.58096	0.00216452	6
AK060890	Os01g0639900	Similar to Carbonic anhydrase, chloroplast precursor (EC 4.2.1.1) (Carbonate dehydratase). (Os01t0639900-01), Non-protein coding transcript. (Os01t0639900-02)	29596	K-TYPFVKEGIANGTLK-L	00000000000000000	240	254	819.458	2	12.1312	0.0218425	6
Os01g0641200	Os01g0641200	0	17282.3	K-QLEDGRTLADYNIQK-E	20000000000000000	49	63	873.943	2	7.73162	0.0331479	5
Os01g0641200	Os01g0641200	0	17282.3	R-TLADYNIQK-E	00000000000	55	63	533.286	2	6.0071	0.0437177	5
Os01g0641200	Os01g0641200	0	17282.3	R-TLADYNIQKESTLHLVLR-L	00000000000000000000	55	72	705.396	3	5.64222	2.10065e-05	5
Os01g0641200	Os01g0641200	0	17282.3	K-ESTLHLVLR-L	00000000000	64	72	534.318	2	7.43752	1.78151e-05	5
AK063836	Os01g0642900	Nucleic acid-binding, OB-fold domain containing protein. (Os01t0642900-01), Nucleic acid-binding, OB-fold domain containing protein. (Os01t0642900-02)	24569.8	R-TVVLFSLGTGGIR-N	000000000000000	112	124	660.392	2	7.07004	6.06554e-07	1
AK071699	Os01g0649100	Malate dehydrogenase. (Os01t0649100-01), Malate dehydrogenase. (Os01t0649100-02)	35722.8	K-VAILGAAGGIGQPLSLLMK-L	000000000000000000300	30	48	913.04	2	6.56707	4.35319e-08	11
AK071699	Os01g0649100	Malate dehydrogenase. (Os01t0649100-01), Malate dehydrogenase. (Os01t0649100-02)	35722.8	K-VAILGAAGGIGQPLSLLMK-L	000000000000000000000	30	48	905.044	2	7.65212	4.75656e-07	11
AK071699	Os01g0649100	Malate dehydrogenase. (Os01t0649100-01), Malate dehydrogenase. (Os01t0649100-02)	35722.8	R-DDLFNINAGIVK-N	00000000000000	114	125	659.859	2	7.48039	1.83003e-05	11
AK071699	Os01g0649100	Malate dehydrogenase. (Os01t0649100-01), Malate dehydrogenase. (Os01t0649100-02)	35722.8	K-KLFGVTTLDVVR-A	00000000000000	168	179	674.408	2	6.15503	1.34672e-05	11
AK071699	Os01g0649100	Malate dehydrogenase. (Os01t0649100-01), Malate dehydrogenase. (Os01t0649100-02)	35722.8	K-LFGVTTLDVVR-A	0000000000000	169	179	610.36	2	6.09313	2.57766e-06	11
AK071699	Os01g0649100	Malate dehydrogenase. (Os01t0649100-01), Malate dehydrogenase. (Os01t0649100-02)	35722.8	K-RTQDGGTEVVEAK-A	000000000000000	233	245	695.355	2	4.10797	0.0131632	11
AK071699	Os01g0649100	Malate dehydrogenase. (Os01t0649100-01), Malate dehydrogenase. (Os01t0649100-02)	35722.8	R-TQDGGTEVVEAK-A	00000000000000	234	245	617.305	2	5.4414	1.49376e-06	11
AK071699	Os01g0649100	Malate dehydrogenase. (Os01t0649100-01), Malate dehydrogenase. (Os01t0649100-02)	35722.8	K-EGLENLKGELK-A	0000000000000	318	328	615.344	2	5.22716	0.000219437	11
AK072075	Os01g0652600	Similar to Ketol-acid reductoisomerase, chloroplast precursor (EC 1.1.1.86) (Acetohydroxy-acid reductoisomerase) (Alpha-keto-beta-hydroxylacil reductoisomerase). (Os01t0652600-01)	60070.5	K-QIGVIGWGSQGPAQAQNLR-D	000000000000000000000	79	97	990.529	2	4.47286	2.54183e-07	11
AK072075	Os01g0652600	Similar to Ketol-acid reductoisomerase, chloroplast precursor (EC 1.1.1.86) (Acetohydroxy-acid reductoisomerase) (Alpha-keto-beta-hydroxylacil reductoisomerase). (Os01t0652600-01)	60070.5	K-QIGVIGWGSQGPAQAQNLR-D	200000000000000000000	79	97	982.017	2	6.28095	0.0183703	11
AK072075	Os01g0652600	Similar to Ketol-acid reductoisomerase, chloroplast precursor (EC 1.1.1.86) (Acetohydroxy-acid reductoisomerase) (Alpha-keto-beta-hydroxylacil reductoisomerase). (Os01t0652600-01)	60070.5	R-DSLAEAKSDIVVK-I	000000000000000	98	110	687.882	2	6.58471	1.06886e-06	11
AK072075	Os01g0652600	Similar to Ketol-acid reductoisomerase, chloroplast precursor (EC 1.1.1.86) (Acetohydroxy-acid reductoisomerase) (Alpha-keto-beta-hydroxylacil reductoisomerase). (Os01t0652600-01)	60070.5	K-EVNGAGINSSFAVHQDVDGR-A	0000000000000000000000	219	238	691.334	3	4.66393	0.0037998	11
AK072075	Os01g0652600	Similar to Ketol-acid reductoisomerase, chloroplast precursor (EC 1.1.1.86) (Acetohydroxy-acid reductoisomerase) (Alpha-keto-beta-hydroxylacil reductoisomerase). (Os01t0652600-01)	60070.5	R-RYTEHGLDEDSAYK-N	0000000000000000	289	302	561.928	3	5.68934	0.001364	11
AK072075	Os01g0652600	Similar to Ketol-acid reductoisomerase, chloroplast precursor (EC 1.1.1.86) (Acetohydroxy-acid reductoisomerase) (Alpha-keto-beta-hydroxylacil reductoisomerase). (Os01t0652600-01)	60070.5	R-YTEHGLDEDSAYK-N	000000000000000	290	302	764.335	2	1.64326	0.0132455	11
AK072075	Os01g0652600	Similar to Ketol-acid reductoisomerase, chloroplast precursor (EC 1.1.1.86) (Acetohydroxy-acid reductoisomerase) (Alpha-keto-beta-hydroxylacil reductoisomerase). (Os01t0652600-01)	60070.5	K-KGMLEVYNSLTEEGKK-Q	000000000000000000	319	334	609.32	3	5.66423	0.00726283	11
AK072075	Os01g0652600	Similar to Ketol-acid reductoisomerase, chloroplast precursor (EC 1.1.1.86) (Acetohydroxy-acid reductoisomerase) (Alpha-keto-beta-hydroxylacil reductoisomerase). (Os01t0652600-01)	60070.5	K-GMLEVYNSLTEEGKK-Q	00300000000000000	320	334	857.426	2	4.98993	7.19053e-07	11
AK072075	Os01g0652600	Similar to Ketol-acid reductoisomerase, chloroplast precursor (EC 1.1.1.86) (Acetohydroxy-acid reductoisomerase) (Alpha-keto-beta-hydroxylacil reductoisomerase). (Os01t0652600-01)	60070.5	K-GMLEVYNSLTEEGKK-Q	00000000000000000	320	334	849.428	2	4.55365	4.57403e-06	11
AK072075	Os01g0652600	Similar to Ketol-acid reductoisomerase, chloroplast precursor (EC 1.1.1.86) (Acetohydroxy-acid reductoisomerase) (Alpha-keto-beta-hydroxylacil reductoisomerase). (Os01t0652600-01)	60070.5	K-EGLPAFPMGNIDQTR-M	00000000000000000	378	392	823.408	2	5.01817	0.0289384	11
AK072075	Os01g0652600	Similar to Ketol-acid reductoisomerase, chloroplast precursor (EC 1.1.1.86) (Acetohydroxy-acid reductoisomerase) (Alpha-keto-beta-hydroxylacil reductoisomerase). (Os01t0652600-01)	60070.5	R-FDYILTQQAFVTVDK-N	00000000000000000	484	498	894.467	2	3.27513	3.09943e-08	11
AK111686	Os01g0653800	Similar to predicted protein. (Os01t0653800-01), WD40 repeat-like domain containing protein. (Os01t0653800-02), Similar to Peptidase S8 and S53, subtilisin, kexin, sedolisin; WD40-like. (Os01t0653800-03)	148176	R-ILLDDGTAHVLQR-S	000000000000000	581	593	725.907	2	4.33389	0.0213312	1
AK061752	Os01g0654500	Similar to NADP-isocitrate dehydrogenase. (Os01t0654500-01)	46439.7	K-YYDLGVLHR-D	00000000000	43	51	568.299	2	1.67517	0.0130122	11
AK061752	Os01g0654500	Similar to NADP-isocitrate dehydrogenase. (Os01t0654500-01)	46439.7	R-DATDDKVTVEAAEATLK-Y	0000000000000000000	52	68	888.952	2	6.11506	0.0338236	11
AK061752	Os01g0654500	Similar to NADP-isocitrate dehydrogenase. (Os01t0654500-01)	46439.7	K-VTVEAAEATLK-Y	0000000000000	58	68	566.319	2	3.95714	0.000167507	11
AK061752	Os01g0654500	Similar to NADP-isocitrate dehydrogenase. (Os01t0654500-01)	46439.7	R-HAFGDQYR-A	0000000000	135	142	497.23	2	-1.44601	0.0199359	11
AK061752	Os01g0654500	Similar to NADP-isocitrate dehydrogenase. (Os01t0654500-01)	46439.7	R-AFAEASMTTAYEK-K	000000000000000	191	203	710.329	2	3.70251	1.33357e-05	11
AK061752	Os01g0654500	Similar to NADP-isocitrate dehydrogenase. (Os01t0654500-01)	46439.7	R-AFAEASMTTAYEK-K	000000030000000	191	203	718.33	2	7.88009	0.000582596	11
AK061752	Os01g0654500	Similar to NADP-isocitrate dehydrogenase. (Os01t0654500-01)	46439.7	K-FEAAGIWYEHR-L	0000000000000	239	249	689.832	2	2.49843	0.00036655	11
AK061752	Os01g0654500	Similar to NADP-isocitrate dehydrogenase. (Os01t0654500-01)	46439.7	K-TIEAEAAHGTVTR-H	000000000000000	302	314	678.354	2	6.90348	1.02351e-08	11
AK061752	Os01g0654500	Similar to NADP-isocitrate dehydrogenase. (Os01t0654500-01)	46439.7	K-GGETSTNSIASIFAWTR-G	0000000000000000000	322	338	899.451	2	10.542	0.00939028	11
AK061752	Os01g0654500	Similar to NADP-isocitrate dehydrogenase. (Os01t0654500-01)	46439.7	K-DLALLIHGSSNVTR-S	0000000000000000	375	388	748.417	2	3.32568	1.75309e-07	11
AK071200	Os01g0659200	Similar to Vacuolar ATP synthase subunit E (EC 3.6.3.14) (V-ATPase E subunit) (Vacuolar proton pump E subunit). (Os01t0659200-01)	26826.1	K-LQLVEAEK-K	0000000000	41	48	465.27	2	2.50285	0.0255539	2
AK071200	Os01g0659200	Similar to Vacuolar ATP synthase subunit E (EC 3.6.3.14) (V-ATPase E subunit) (Vacuolar proton pump E subunit). (Os01t0659200-01)	26826.1	K-LQLVEAEKKK-I	000000000000	41	50	593.355	2	-14.1585	0.047444	2
AK071200	Os01g0659200	Similar to Vacuolar ATP synthase subunit E (EC 3.6.3.14) (V-ATPase E subunit) (Vacuolar proton pump E subunit). (Os01t0659200-01)	26826.1	K-ELVVQGLLR-L	00000000000	116	124	513.821	2	4.09286	2.98085e-05	2
AK106457	Os01g0660300	Similar to Pyruvate kinase. (Os01t0660300-01)	34916.7	R-AEVSDIAIAVR-E	0000000000000	208	218	572.324	2	2.75281	2.02559e-05	1
AK119723	Os01g0662600	Similar to NifU-like protein. (Os01t0662600-01), Similar to NifU-like protein. (Os01t0662600-02), Similar to NifU-like protein. (Os01t0662600-03), Similar to nifU-like N-terminal domain-containing protein. (Os01t0662600-04), Similar to Nifu-like N-terminal domain-containing protein (Fragment). (Os01t0662600-05)	18216.4	R-VVDHYENPR-N	00000000000	38	46	564.778	2	5.31448	0.0205177	1
AK060072	Os01g0663500	Transcriptional coactivator/pterin dehydratase family protein. (Os01t0663500-01)	21487.1	R-GLTDNDFILAAK-I	00000000000000	161	172	639.343	2	3.56773	0.00879941	2
AK060072	Os01g0663500	Transcriptional coactivator/pterin dehydratase family protein. (Os01t0663500-01)	21487.1	K-INNLNLEGLLSK-K	00000000000000	173	184	664.387	2	6.45482	3.00513e-07	2
AK069846	Os01g0664500	Lg106-like family protein. (Os01t0664500-01), Non-protein coding transcript. (Os01t0664500-02), Lg106-like family protein. (Os01t0664500-03)	15824.7	R-AYFDSADWALGK-Q	00000000000000	68	79	672.322	2	7.99765	0.0269795	2
AK069846	Os01g0664500	Lg106-like family protein. (Os01t0664500-01), Non-protein coding transcript. (Os01t0664500-02), Lg106-like family protein. (Os01t0664500-03)	15824.7	K-GPLEALRPK-L	00000000000	88	96	490.8	2	4.80032	0.000749365	2
AK065097	Os01g0665400	Ribokinase family protein. (Os01t0665400-01)	37425.4	R-LAAGPTYLVAR-V	0000000000000	104	114	566.333	2	6.66833	0.0054415	6
AK065097	Os01g0665400	Ribokinase family protein. (Os01t0665400-01)	37425.4	R-LLEGALADAGGVR-L	000000000000000	123	135	621.355	2	14.3815	0.000392219	6
AK065097	Os01g0665400	Ribokinase family protein. (Os01t0665400-01)	37425.4	R-LLEGALADAGGVRLDR-V	000000000000000000	123	138	542.64	3	5.82584	0.000415925	6
AK065097	Os01g0665400	Ribokinase family protein. (Os01t0665400-01)	37425.4	R-RAGVLLLQR-E	00000000000	187	195	513.335	2	4.83115	0.0281662	6
AK065097	Os01g0665400	Ribokinase family protein. (Os01t0665400-01)	37425.4	R-EIPDWVNVQVAQAAK-G	00000000000000000	196	210	834.449	2	9.01733	0.022691	6
AK065097	Os01g0665400	Ribokinase family protein. (Os01t0665400-01)	37425.4	K-LGSQGSALFIEGGEPIR-Q	0000000000000000000	278	294	865.962	2	5.41652	0.000308165	6
J013049D02	Os01g0666900	Non-protein coding transcript. (Os01t0666900-00)	21514.4	R-FHQYQVVGR-A	00000000000	6	14	567.299	2	4.89953	0.0237911	1
AK111561	Os01g0667600	Similar to GTP-binding protein. (Os01t0667600-01)	24571.4	R-FARDEFSLETR-S	0000000000000	39	49	457.565	3	6.77427	0.0351392	4
AK111561	Os01g0667600	Similar to GTP-binding protein. (Os01t0667600-01)	24571.4	R-STIGVEFATK-T	000000000000	50	59	526.788	2	6.65448	0.0116035	4
AK111561	Os01g0667600	Similar to GTP-binding protein. (Os01t0667600-01)	24571.4	K-AQIWDTAGQER-Y	0000000000000	70	80	637.813	2	5.14649	3.16714e-06	4
AK111561	Os01g0667600	Similar to GTP-binding protein. (Os01t0667600-01)	24571.4	R-GAVGALVVYDVTR-R	000000000000000	91	103	660.374	2	6.51903	1.92893e-06	4
AK107129	Os01g0672300	Conserved hypothetical protein. (Os01t0672300-01)	45479.5	K-DENEASRKNTR-R	0000000000000	215	225	660.315	2	-4.69851	0.0115271	1
AK060407	Os01g0672500	Glycosyl transferase, family 48 protein. (Os01t0672500-01)	54494.7	R-ILFNEAFSR-G	00000000000	452	460	548.796	2	5.98947	0.003836	1
AK122067	Os01g0673600	Similar to Ubiquitin-conjugating enzyme E2. (Os01t0673600-01)	17220	R-LLSEPAPGISASPSEENMR-Y	000000000000000000000	17	35	992.992	2	6.03228	0.000271111	6
AK122067	Os01g0673600	Similar to Ubiquitin-conjugating enzyme E2. (Os01t0673600-01)	17220	R-LLSEPAPGISASPSEENMR-Y	000000000000000000300	17	35	1000.99	2	5.9651	0.00932132	6
AK122067	Os01g0673600	Similar to Ubiquitin-conjugating enzyme E2. (Os01t0673600-01)	17220	K-LELFLPEEYPMAAPK-V	00000000000300000	56	70	882.454	2	4.21042	0.00508789	6
AK122067	Os01g0673600	Similar to Ubiquitin-conjugating enzyme E2. (Os01t0673600-01)	17220	K-LELFLPEEYPMAAPK-V	00000000000000000	56	70	874.459	2	8.11358	0.029452	6
AK122067	Os01g0673600	Similar to Ubiquitin-conjugating enzyme E2. (Os01t0673600-01)	17220	K-ANEAEAVETAK-E	0000000000000	133	143	566.781	2	6.46369	0.000249877	6
AK122067	Os01g0673600	Similar to Ubiquitin-conjugating enzyme E2. (Os01t0673600-01)	17220	K-ANEAEAVETAKEWTR-L	00000000000000000	133	147	852.918	2	6.11782	2.66539e-06	6
AK058509	Os01g0675100	Similar to peroxiredoxin. (Os01t0675100-01)	17351.1	K-LQQVSVHGLAAGK-K	000000000000000	24	36	654.381	2	9.19571	0.00401041	7
AK058509	Os01g0675100	Similar to peroxiredoxin. (Os01t0675100-01)	17351.1	K-GVDDILLVSVNDPFVMK-A	0000000000000000000	70	86	931.002	2	10.0333	6.56477e-05	7
AK058509	Os01g0675100	Similar to peroxiredoxin. (Os01t0675100-01)	17351.1	K-GVDDILLVSVNDPFVMK-A	0000000000000000300	70	86	938.993	2	3.81419	0.0168457	7
AK058509	Os01g0675100	Similar to peroxiredoxin. (Os01t0675100-01)	17351.1	K-FLADGLGTYTK-A	0000000000000	100	110	593.316	2	7.72439	1.67693e-06	7
AK058509	Os01g0675100	Similar to peroxiredoxin. (Os01t0675100-01)	17351.1	K-ALGLELDLSEK-G	0000000000000	111	121	594.334	2	7.00196	5.14337e-06	7
AK058509	Os01g0675100	Similar to peroxiredoxin. (Os01t0675100-01)	17351.1	R-RFALLADNLK-V	000000000000	129	138	580.846	2	4.66389	0.00126222	7
AK058509	Os01g0675100	Similar to peroxiredoxin. (Os01t0675100-01)	17351.1	R-FALLADNLK-V	00000000000	130	138	502.795	2	4.45709	0.000416727	7
AK062530	Os01g0679600	Similar to THAP domain-containing protein 4. (Os01t0679600-01), Region of unknown function DUF1794 domain containing protein. (Os01t0679600-02)	17591.1	K-TVTLQSELVGNASK-V	0000000000000000	111	124	723.9	2	9.10347	0.00101718	1
AK119702	Os01g0679700	Similar to 60S ribosomal protein L37a. (Os01t0679700-01), Similar to 60S ribosomal protein L37a. (Os01t0679700-02), Similar to 60S ribosomal protein L37a. (Os01t0679700-03)	10520.5	K-AGGAYTMNTASAVTVR-S	000000000000000000	65	80	785.389	2	1.40058	1.42369e-08	2
AK119702	Os01g0679700	Similar to 60S ribosomal protein L37a. (Os01t0679700-01), Similar to 60S ribosomal protein L37a. (Os01t0679700-02), Similar to 60S ribosomal protein L37a. (Os01t0679700-03)	10520.5	K-AGGAYTMNTASAVTVR-S	000000030000000000	65	80	793.39	2	5.43302	6.55502e-06	2
AK072230	Os01g0681100	Similar to Dynamin-related protein 1B (Dynamin-like protein B). (Os01t0681100-01)	20364.8	K-SSVLESVVGKDFLPR-G	00000000000000000	48	62	816.955	2	4.34112	7.57021e-06	1
AB008845	Os01g0681900	Non-protein coding transcript. (Os01t0681900-01)	239302	K-VLDITYPK-K	0000000000	694	701	474.777	2	6.14184	0.042229	3
AB008845	Os01g0681900	Non-protein coding transcript. (Os01t0681900-01)	239302	K-VIGDIAVTR-H	00000000000	1092	1100	472.285	2	5.30718	0.000879153	3
AB008845	Os01g0681900	Non-protein coding transcript. (Os01t0681900-01)	239302	K-KVQPEQSTNRPTR-V	000000000000000	1642	1654	514.279	3	2.55698	0.010335	3
AK064953	Os01g0685800	Similar to ATP synthase beta chain, mitochondrial precursor (EC 3.6.3.14). (Os01t0685800-01), Similar to ATP synthase subunit beta, mitochondrial. (Os01t0685800-02)	59639.1	R-LVLEVAQHLGENMVR-T	00000000000003000	121	135	862.466	2	5.15499	3.25402e-06	28
AK064953	Os01g0685800	Similar to ATP synthase beta chain, mitochondrial precursor (EC 3.6.3.14). (Os01t0685800-01), Similar to ATP synthase subunit beta, mitochondrial. (Os01t0685800-02)	59639.1	R-LVLEVAQHLGENMVR-T	00000000000000000	121	135	854.466	2	2.31197	9.46179e-06	28
AK064953	Os01g0685800	Similar to ATP synthase beta chain, mitochondrial precursor (EC 3.6.3.14). (Os01t0685800-01), Similar to ATP synthase subunit beta, mitochondrial. (Os01t0685800-02)	59639.1	R-TIAMDGTEGLVR-G	00000000000000	136	147	631.828	2	6.18206	0.00048994	28
AK064953	Os01g0685800	Similar to ATP synthase beta chain, mitochondrial precursor (EC 3.6.3.14). (Os01t0685800-01), Similar to ATP synthase subunit beta, mitochondrial. (Os01t0685800-02)	59639.1	R-TIAMDGTEGLVR-G	00003000000000	136	147	639.828	2	9.98159	0.00688713	28
AK064953	Os01g0685800	Similar to ATP synthase beta chain, mitochondrial precursor (EC 3.6.3.14). (Os01t0685800-01), Similar to ATP synthase subunit beta, mitochondrial. (Os01t0685800-02)	59639.1	R-VLNTGSPITVPVGR-A	0000000000000000	151	164	705.413	2	5.61019	1.01627e-05	28
AK064953	Os01g0685800	Similar to ATP synthase beta chain, mitochondrial precursor (EC 3.6.3.14). (Os01t0685800-01), Similar to ATP synthase subunit beta, mitochondrial. (Os01t0685800-02)	59639.1	R-IMNVIGEPIDEK-G	00000000000000	170	181	679.359	2	4.86562	9.65003e-08	28
AK064953	Os01g0685800	Similar to ATP synthase beta chain, mitochondrial precursor (EC 3.6.3.14). (Os01t0685800-01), Similar to ATP synthase subunit beta, mitochondrial. (Os01t0685800-02)	59639.1	R-IMNVIGEPIDEK-G	00300000000000	170	181	687.355	2	3.2676	0.000637791	28
AK064953	Os01g0685800	Similar to ATP synthase beta chain, mitochondrial precursor (EC 3.6.3.14). (Os01t0685800-01), Similar to ATP synthase subunit beta, mitochondrial. (Os01t0685800-02)	59639.1	R-EAPAFVEQATEQQILVTGIK-V	0000000000000000000000	195	214	1086.59	2	5.13673	1.23726e-09	28
AK064953	Os01g0685800	Similar to ATP synthase beta chain, mitochondrial precursor (EC 3.6.3.14). (Os01t0685800-01), Similar to ATP synthase subunit beta, mitochondrial. (Os01t0685800-02)	59639.1	K-VVDLLAPYQR-G	000000000000	215	224	587.338	2	5.73605	9.55134e-05	28
AK064953	Os01g0685800	Similar to ATP synthase beta chain, mitochondrial precursor (EC 3.6.3.14). (Os01t0685800-01), Similar to ATP synthase subunit beta, mitochondrial. (Os01t0685800-02)	59639.1	K-IGLFGGAGVGK-T	0000000000000	228	238	488.286	2	1.65477	0.000102842	28
AK064953	Os01g0685800	Similar to ATP synthase beta chain, mitochondrial precursor (EC 3.6.3.14). (Os01t0685800-01), Similar to ATP synthase subunit beta, mitochondrial. (Os01t0685800-02)	59639.1	K-TVLIMELINNVAK-A	000000000000000	239	251	729.429	2	6.99315	2.98121e-05	28
AK064953	Os01g0685800	Similar to ATP synthase beta chain, mitochondrial precursor (EC 3.6.3.14). (Os01t0685800-01), Similar to ATP synthase subunit beta, mitochondrial. (Os01t0685800-02)	59639.1	K-AHGGFSVFAGVGER-T	0000000000000000	252	265	695.85	2	4.35295	3.12346e-07	28
AK064953	Os01g0685800	Similar to ATP synthase beta chain, mitochondrial precursor (EC 3.6.3.14). (Os01t0685800-01), Similar to ATP synthase subunit beta, mitochondrial. (Os01t0685800-02)	59639.1	R-TREGNDLYR-E	00000000000	266	274	562.282	2	7.66963	0.0121812	28
AK064953	Os01g0685800	Similar to ATP synthase beta chain, mitochondrial precursor (EC 3.6.3.14). (Os01t0685800-01), Similar to ATP synthase subunit beta, mitochondrial. (Os01t0685800-02)	59639.1	R-VGLTGLTVAEHFR-D	000000000000000	310	322	700.391	2	4.601	1.35785e-06	28
AK064953	Os01g0685800	Similar to ATP synthase beta chain, mitochondrial precursor (EC 3.6.3.14). (Os01t0685800-01), Similar to ATP synthase subunit beta, mitochondrial. (Os01t0685800-02)	59639.1	R-FTQANSEVSALLGR-I	0000000000000000	339	352	746.896	2	5.57307	5.25288e-09	28
AK064953	Os01g0685800	Similar to ATP synthase beta chain, mitochondrial precursor (EC 3.6.3.14). (Os01t0685800-01), Similar to ATP synthase subunit beta, mitochondrial. (Os01t0685800-02)	59639.1	R-IPSAVGYQPTLATDLGGLQER-I	00000000000000000000000	353	373	1093.58	2	6.65427	4.42003e-08	28
AK064953	Os01g0685800	Similar to ATP synthase beta chain, mitochondrial precursor (EC 3.6.3.14). (Os01t0685800-01), Similar to ATP synthase subunit beta, mitochondrial. (Os01t0685800-02)	59639.1	R-QISELGIYPAVDPLDSTSR-M	000000000000000000000	416	434	1031.04	2	6.50851	4.84152e-07	28
AK064953	Os01g0685800	Similar to ATP synthase beta chain, mitochondrial precursor (EC 3.6.3.14). (Os01t0685800-01), Similar to ATP synthase subunit beta, mitochondrial. (Os01t0685800-02)	59639.1	R-MLSPHVLGEDHYNTAR-G	000000000000000000	435	450	613.968	3	5.30972	0.000171394	28
AK064953	Os01g0685800	Similar to ATP synthase beta chain, mitochondrial precursor (EC 3.6.3.14). (Os01t0685800-01), Similar to ATP synthase subunit beta, mitochondrial. (Os01t0685800-02)	59639.1	R-MLSPHVLGEDHYNTAR-G	030000000000000000	435	450	619.301	3	6.29796	0.000349502	28
AK121587	Os01g0686800	Guanine nucleotide-binding protein beta subunit-like protein (GPB-LR) (RWD). (Os01t0686800-01)	36777.3	M-AGAQESLVLAGVMHGHNDVVTAIATPIDNSPFIVSSSR-D	1000000000000000000000000000000000000000	2	39	1301.67	3	7.25606	2.00638e-05	8
AK121587	Os01g0686800	Guanine nucleotide-binding protein beta subunit-like protein (GPB-LR) (RWD). (Os01t0686800-01)	36777.3	R-LWDLSTGVTTR-R	0000000000000	101	111	624.837	2	7.00342	0.00393648	8
AK121587	Os01g0686800	Guanine nucleotide-binding protein beta subunit-like protein (GPB-LR) (RWD). (Os01t0686800-01)	36777.3	R-RFVGHDKDVLSVAFSVDNR-Q	000000000000000000000	112	130	721.046	3	3.81483	0.00114225	8
AK121587	Os01g0686800	Guanine nucleotide-binding protein beta subunit-like protein (GPB-LR) (RWD). (Os01t0686800-01)	36777.3	R-FVGHDKDVLSVAFSVDNR-Q	00000000000000000000	113	130	669.013	3	5.57837	0.000761132	8
AK121587	Os01g0686800	Guanine nucleotide-binding protein beta subunit-like protein (GPB-LR) (RWD). (Os01t0686800-01)	36777.3	K-DVLSVAFSVDNR-Q	00000000000000	119	130	661.347	2	9.37405	0.0484577	8
AK121587	Os01g0686800	Guanine nucleotide-binding protein beta subunit-like protein (GPB-LR) (RWD). (Os01t0686800-01)	36777.3	K-DGVTLLWDLAEGK-R	000000000000000	230	242	708.878	2	8.4803	0.0381415	8
AK121587	Os01g0686800	Guanine nucleotide-binding protein beta subunit-like protein (GPB-LR) (RWD). (Os01t0686800-01)	36777.3	K-HIVQDLKPEIPVSK-N	0000000000000000	282	295	801.969	2	5.30569	1.43348e-05	8
AK068018	Os01g0691700	Similar to Serine/threonine protein phosphatase 2A. (Os01t0691700-01)	35393.3	R-GAGWLFGSR-V	00000000000	208	216	475.75	2	7.96953	0.00737358	1
AK073138	Os01g0693800	Similar to Threonine synthase, chloroplast precursor (EC 4.2.3.1) (TS). (Os01t0693800-01), Similar to Threonine synthase, chloroplast precursor (EC 4.2.3.1) (TS). (Os01t0693800-02)	58376.5	R-TVVVSTAHGLK-F	0000000000000	469	479	556.33	2	4.40656	7.94334e-05	1
AK066673	Os01g0694200	Conserved hypothetical protein. (Os01t0694200-01)	48593.7	R-KEGAGAAVRKSLHK-K	0000000000000000	233	246	726.436	2	14.5099	0.0277277	1
AK067215	Os01g0698000	Conserved hypothetical protein. (Os01t0698000-01), Conserved hypothetical protein. (Os01t0698000-02)	36051.3	--MEKGDETLAYPAAAAGGQK-T	130000000000000000000	1	19	983.47	2	5.69971	7.74623e-05	8
AK067215	Os01g0698000	Conserved hypothetical protein. (Os01t0698000-01), Conserved hypothetical protein. (Os01t0698000-02)	36051.3	--MEKGDETLAYPAAAAGGQK-T	100000000000000000000	1	19	975.471	2	4.26973	0.00523307	8
AK067215	Os01g0698000	Conserved hypothetical protein. (Os01t0698000-01), Conserved hypothetical protein. (Os01t0698000-02)	36051.3	K-SYAAVAAEK-T	00000000000	42	50	455.241	2	7.90351	0.0351093	8
AK067215	Os01g0698000	Conserved hypothetical protein. (Os01t0698000-01), Conserved hypothetical protein. (Os01t0698000-02)	36051.3	K-SYAAVVAEK-T	00000000000	73	81	469.257	2	7.33607	0.0163716	8
AK067215	Os01g0698000	Conserved hypothetical protein. (Os01t0698000-01), Conserved hypothetical protein. (Os01t0698000-02)	36051.3	K-TSPNGSVAEDEVTVTAAENR-A	0000000000000000000000	82	101	1023.98	2	1.73733	3.36345e-08	8
AK067215	Os01g0698000	Conserved hypothetical protein. (Os01t0698000-01), Conserved hypothetical protein. (Os01t0698000-02)	36051.3	K-TVPDGSVAEDEVTVTAPVNPAK-S	000000000000000000000000	144	165	1098.56	2	8.34225	0.000205331	8
AK067215	Os01g0698000	Conserved hypothetical protein. (Os01t0698000-01), Conserved hypothetical protein. (Os01t0698000-02)	36051.3	K-QNSVVFQYIASSSDAK-V	000000000000000000	216	231	872.437	2	6.91683	0.000132495	8
AK067215	Os01g0698000	Conserved hypothetical protein. (Os01t0698000-01), Conserved hypothetical protein. (Os01t0698000-02)	36051.3	R-AAAAAAAAAAEDER-V	0000000000000000	292	305	629.807	2	3.3415	3.42196e-07	8
AK109495	Os01g0700000	Conserved hypothetical protein. (Os01t0700000-01), Conserved hypothetical protein. (Os01t0700000-02)	27547.4	K-AEALVVVQEPEVK-R	000000000000000	133	145	705.899	2	5.27483	0.000111196	4
AK109495	Os01g0700000	Conserved hypothetical protein. (Os01t0700000-01), Conserved hypothetical protein. (Os01t0700000-02)	27547.4	K-AEALVVVQEPEVKR-E	0000000000000000	133	146	783.952	2	7.22111	0.00193139	4
AK109495	Os01g0700000	Conserved hypothetical protein. (Os01t0700000-01), Conserved hypothetical protein. (Os01t0700000-02)	27547.4	R-SLGAADTTEVAR-G	00000000000000	219	230	595.806	2	2.43032	3.96853e-05	4
AK109495	Os01g0700000	Conserved hypothetical protein. (Os01t0700000-01), Conserved hypothetical protein. (Os01t0700000-02)	27547.4	R-GPAVAVAAAGQR-A	00000000000000	231	242	534.304	2	5.04862	8.39897e-09	4
AK059936	Os01g0706000	Similar to RNA polymerase II transcriptional coactivator KELP. (Os01t0706000-01), Similar to RNA polymerase II transcriptional coactivator KELP. (Os01t0706000-02), Similar to RNA polymerase II transcriptional coactivator KELP. (Os01t0706000-03)	21086.4	K-KVESTVLEILR-G	0000000000000	8	18	643.892	2	6.87926	0.000428712	4
AK059936	Os01g0706000	Similar to RNA polymerase II transcriptional coactivator KELP. (Os01t0706000-01), Similar to RNA polymerase II transcriptional coactivator KELP. (Os01t0706000-02), Similar to RNA polymerase II transcriptional coactivator KELP. (Os01t0706000-03)	21086.4	R-GSDMESLTEFK-V	0000000000000	19	29	622.283	2	6.76541	7.33494e-05	4
AK059936	Os01g0706000	Similar to RNA polymerase II transcriptional coactivator KELP. (Os01t0706000-01), Similar to RNA polymerase II transcriptional coactivator KELP. (Os01t0706000-02), Similar to RNA polymerase II transcriptional coactivator KELP. (Os01t0706000-03)	21086.4	R-GSDMESLTEFKVR-T	000000000000000	19	31	749.869	2	6.61116	0.0219954	4
AK059936	Os01g0706000	Similar to RNA polymerase II transcriptional coactivator KELP. (Os01t0706000-01), Similar to RNA polymerase II transcriptional coactivator KELP. (Os01t0706000-02), Similar to RNA polymerase II transcriptional coactivator KELP. (Os01t0706000-03)	21086.4	R-LGIDLSIPDR-K	000000000000	38	47	549.814	2	4.71523	0.000373562	4
Os01g0706500	Os01g0706500	Ribosomal protein L28e domain containing protein. (Os01t0706500-00)	16272.7	K-NQVSDNYYRPDLTKPALAR-L	000000000000000000000	104	122	741.054	3	5.27132	0.00229302	1
AK061091	Os01g0708500	Conserved hypothetical protein CHP00730 domain containing protein. (Os01t0708500-01), Conserved hypothetical protein CHP00730 domain containing protein. (Os01t0708500-02), Similar to lysine decarboxylase-like protein. (Os01t0708500-03)	23888	R-AVFGDAALQLGQELVSR-G	0000000000000000000	33	49	887.485	2	7.71562	0.00508938	1
AK111377	Os01g0708600	TRAPP I complex, Trs31 domain containing protein. (Os01t0708600-01)	21868.5	R-LEDAGYAVGAR-V	0000000000000	55	65	561.283	2	0.0873	0.0087065	1
AK121006	Os01g0709400	Survival protein SurE family protein. (Os01t0709400-01)	43939.2	R-ETITATSVDFK-G	0000000000000	116	126	606.315	2	6.53868	0.00204987	1
AK103899	Os01g0711000	Similar to Vacuolar ATP synthase subunit B isoform 2 (EC 3.6.3.14) (V-ATPase B subunit 2) (Vacuolar proton pump B subunit 2). (Os01t0711000-01)	54387.7	R-TVSGVAGPLVILDK-V	0000000000000000	23	36	684.913	2	7.06586	0.000831407	10
AK103899	Os01g0711000	Similar to Vacuolar ATP synthase subunit B isoform 2 (EC 3.6.3.14) (V-ATPase B subunit 2) (Vacuolar proton pump B subunit 2). (Os01t0711000-01)	54387.7	K-YQEIVNIR-L	0000000000	42	49	517.788	2	5.43659	0.000417166	10
AK103899	Os01g0711000	Similar to Vacuolar ATP synthase subunit B isoform 2 (EC 3.6.3.14) (V-ATPase B subunit 2) (Vacuolar proton pump B subunit 2). (Os01t0711000-01)	54387.7	K-AVVQVFEGTSGIDNK-Y	00000000000000000	68	82	782.412	2	9.35313	0.000213443	10
AK103899	Os01g0711000	Similar to Vacuolar ATP synthase subunit B isoform 2 (EC 3.6.3.14) (V-ATPase B subunit 2) (Vacuolar proton pump B subunit 2). (Os01t0711000-01)	54387.7	K-YTTVQFTGEVLK-T	00000000000000	83	94	693.373	2	4.93386	0.00011003	10
AK103899	Os01g0711000	Similar to Vacuolar ATP synthase subunit B isoform 2 (EC 3.6.3.14) (V-ATPase B subunit 2) (Vacuolar proton pump B subunit 2). (Os01t0711000-01)	54387.7	K-TPVSLDMLGR-V	000000000000	95	104	544.795	2	4.57787	6.83817e-05	10
AK103899	Os01g0711000	Similar to Vacuolar ATP synthase subunit B isoform 2 (EC 3.6.3.14) (V-ATPase B subunit 2) (Vacuolar proton pump B subunit 2). (Os01t0711000-01)	54387.7	R-VTLFLNLANDPTIER-I	00000000000000000	235	249	858.473	2	3.99488	2.65153e-06	10
AK103899	Os01g0711000	Similar to Vacuolar ATP synthase subunit B isoform 2 (EC 3.6.3.14) (V-ATPase B subunit 2) (Vacuolar proton pump B subunit 2). (Os01t0711000-01)	54387.7	R-GYPGYMYTDLATIYER-A	000000000000000000	300	315	956.945	2	2.37788	0.00308348	10
AK103899	Os01g0711000	Similar to Vacuolar ATP synthase subunit B isoform 2 (EC 3.6.3.14) (V-ATPase B subunit 2) (Vacuolar proton pump B subunit 2). (Os01t0711000-01)	54387.7	R-DHSDVSNQLYANYAIGK-D	0000000000000000000	392	408	947.956	2	6.19596	0.00705922	10
AK103899	Os01g0711000	Similar to Vacuolar ATP synthase subunit B isoform 2 (EC 3.6.3.14) (V-ATPase B subunit 2) (Vacuolar proton pump B subunit 2). (Os01t0711000-01)	54387.7	R-KFVTQGAYDTR-N	0000000000000	439	449	643.334	2	5.85466	0.00233446	10
AK103899	Os01g0711000	Similar to Vacuolar ATP synthase subunit B isoform 2 (EC 3.6.3.14) (V-ATPase B subunit 2) (Vacuolar proton pump B subunit 2). (Os01t0711000-01)	54387.7	K-FVTQGAYDTR-N	000000000000	440	449	579.287	2	6.48038	0.000487715	10
AY346327	Os01g0711400	Similar to Victorin binding protein. (Os01t0711400-01)	112634	R-IIGVSVDSSGKPALR-M	00000000000000000	362	376	749.938	2	7.10858	0.00665825	1
J100034P04	Os01g0712700	CMP/dCMP deaminase, zinc-binding domain containing protein. (Os01t0712700-01)	32306.4	K-EAGLVSQEATAR-I	00000000000000	279	290	616.319	2	3.11608	0.00301491	1
AK111495	Os01g0714900	Similar to RAB7A. (Os01t0714900-01)	23601.8	R-LVTLQIWDTAGQER-F	0000000000000000	57	70	815.438	2	5.04576	8.70186e-05	2
AK111495	Os01g0714900	Similar to RAB7A. (Os01t0714900-01)	23601.8	R-FQSLGVAFYR-G	000000000000	71	80	594.317	2	4.52032	0.00294275	2
Os01g0715500	Os01g0715500	Similar to voltage-dependent anion channel protein 2. (Os01t0715500-00)	33988.4	K-SVAVGADVAVDTSTGDFTK-Y	000000000000000000000	181	199	920.461	2	9.76467	0.000145217	3
Os01g0715500	Os01g0715500	Similar to voltage-dependent anion channel protein 2. (Os01t0715500-00)	33988.4	K-ESGTAAGAELTHSFSTK-E	0000000000000000000	235	251	847.411	2	6.56234	1.27019e-05	3
Os01g0715500	Os01g0715500	Similar to voltage-dependent anion channel protein 2. (Os01t0715500-00)	33988.4	K-SFLTLSAEVDTK-A	00000000000000	291	302	655.852	2	9.63937	8.00177e-05	3
AK121001	Os01g0721900	Similar to Nuclear RNA binding protein B (Fragment). (Os01t0721900-01), Similar to plasminogen activator inhibitor 1 RNA-binding protein. (Os01t0721900-02)	40401.8	K-AAQAASAAAKFPTKPAPPTQAAR-E	0000000000000000000000000	48	70	741.41	3	5.19775	6.04695e-06	3
AK121001	Os01g0721900	Similar to Nuclear RNA binding protein B (Fragment). (Os01t0721900-01), Similar to plasminogen activator inhibitor 1 RNA-binding protein. (Os01t0721900-02)	40401.8	K-QGEQDDAPTGEKDNK-E	00000000000000000	215	229	816.365	2	5.65066	0.0114076	3
AK121001	Os01g0721900	Similar to Nuclear RNA binding protein B (Fragment). (Os01t0721900-01), Similar to plasminogen activator inhibitor 1 RNA-binding protein. (Os01t0721900-02)	40401.8	K-ALLAFKAEER-K	000000000000	260	269	574.331	2	7.50786	0.000118561	3
J090011E02	Os01g0722800	Dimethylmenaquinone methyltransferase family protein. (Os01t0722800-00)	18408.5	R-RQVFAGPIVTLK-V	00000000000000	37	48	664.909	2	3.9261	0.0167647	1
J090011E02	Os01g0722800	Dimethylmenaquinone methyltransferase family protein. (Os01t0722800-00)	18408.5	K-VYEDNVLIR-E	00000000000	49	57	560.808	2	7.91804	0.00966621	1
AK073592	Os01g0723000	Similar to Elongation factor EF-2 (Fragment). (Os01t0723000-01)	96273.8	R-NMSVIAHVDHGK-S	00000000000000	21	32	654.333	2	5.06241	0.000741084	4
AK073592	Os01g0723000	Similar to Elongation factor EF-2 (Fragment). (Os01t0723000-01)	96273.8	K-GRFFAFGR-V	0000000000	392	399	479.258	2	4.33065	0.0496	4
AK073592	Os01g0723000	Similar to Elongation factor EF-2 (Fragment). (Os01t0723000-01)	96273.8	K-ILSEEFGWDKDLAK-K	0000000000000000	629	642	825.926	2	4.725	0.0023671	4
AK073592	Os01g0723000	Similar to Elongation factor EF-2 (Fragment). (Os01t0723000-01)	96273.8	K-DSVVAGFQWASK-E	00000000000000	672	683	647.828	2	5.17653	0.00147839	4
AK099646	Os01g0723400	Malic oxidoreductase family protein. (Os01t0723400-01), Similar to Malic enzyme. (Os01t0723400-02), Similar to Malic enzyme. (Os01t0723400-03)	65737.1	K-ILEVLKNWPER-S	0000000000000	171	181	698.902	2	0.907853	0.000351557	5
AK099646	Os01g0723400	Malic oxidoreductase family protein. (Os01t0723400-01), Similar to Malic enzyme. (Os01t0723400-02), Similar to Malic enzyme. (Os01t0723400-03)	65737.1	R-SIQVIVVTDGER-I	00000000000000	182	193	658.368	2	6.11208	6.00207e-09	5
AK099646	Os01g0723400	Malic oxidoreductase family protein. (Os01t0723400-01), Similar to Malic enzyme. (Os01t0723400-02), Similar to Malic enzyme. (Os01t0723400-03)	65737.1	K-AYELGLASR-R	00000000000	560	568	490.267	2	5.33995	3.59452e-05	5
AK109735	Os01g0723600	Ribose-phosphate pyrophosphokinase 3 (EC 2.7.6.1) (Phosphoribosyl pyrophosphate synthetase 3). (Os01t0723600-01)	44236.8	R-ILSNIPISR-G	00000000000	211	219	506.815	2	7.04104	0.00653912	1
AK067006	Os01g0723800	Similar to P-glycoprotein homologue. (Os01t0723800-01), Hypothetical conserved gene. (Os01t0723800-02)	135269	K-TVYSFTAEKRIIQR-Y	0000000000000000	236	249	856.467	2	-12.7226	0.0407234	1
AK121245	Os01g0736900	Reticulon family protein. (Os01t0736900-01), Similar to seed maturation protein. (Os01t0736900-02)	28550.1	M-AEHKEEQSVMEK-L	10000000000000	2	13	743.851	2	6.77421	0.000925034	1
AK121245	Os01g0736900	Reticulon family protein. (Os01t0736900-01), Similar to seed maturation protein. (Os01t0736900-02)	28550.1	R-ERPVHSVLGGGKPADLVLWR-N	0000000000000000000000	56	75	547.314	4	7.40434	0.0350846	1
Os01g0737600	Os01g0737600	Similar to OSIGBa0101A01.4 protein. (Os01t0737600-00)	23752.8	R-YLAAQTIGKPALR-S	000000000000000	137	149	701.418	2	4.9457	2.44908e-05	2
Os01g0737600	Os01g0737600	Similar to OSIGBa0101A01.4 protein. (Os01t0737600-00)	23752.8	R-SAGLQGLVR-E	00000000000	150	158	450.77	2	6.39795	0.0129762	2
Os01g0737700	Os01g0737700	Similar to OSIGBa0101A01.4 protein. (Os01t0737700-00)	26607.1	R-YLAAQTIGKPALR-S	000000000000000	162	174	701.418	2	4.9457	2.44908e-05	1
AK069568	Os01g0739000	Similar to Mitochondrial processing peptidase. (Os01t0739000-01), Similar to Mitochondrial processing peptidase. (Os01t0739000-02)	54406.9	R-EVEAIGGNVSASASR-E	00000000000000000	134	148	723.864	2	2.20621	0.00296315	2
AK069568	Os01g0739000	Similar to Mitochondrial processing peptidase. (Os01t0739000-01), Similar to Mitochondrial processing peptidase. (Os01t0739000-02)	54406.9	R-VVASEDIGR-Q	00000000000	429	437	473.257	2	6.72151	6.35647e-05	2
AK063421	Os01g0742200	Similar to Elongation factor EF-2 (Fragment). (Os01t0742200-01)	93148.3	R-IRPVLTVNKMDR-C	00000000003000	151	162	486.616	3	5.50537	0.0124349	4
AK063421	Os01g0742200	Similar to Elongation factor EF-2 (Fragment). (Os01t0742200-01)	93148.3	K-ILSEEFGWDKDLAK-K	0000000000000000	615	628	825.926	2	4.725	0.0023671	4
AK063421	Os01g0742200	Similar to Elongation factor EF-2 (Fragment). (Os01t0742200-01)	93148.3	K-DSVVAGFQWASK-E	00000000000000	658	669	647.828	2	5.17653	0.00147839	4
AK063421	Os01g0742200	Similar to Elongation factor EF-2 (Fragment). (Os01t0742200-01)	93148.3	R-GHVFEEMQRPGTPLYNIK-A	00000003000000000000	751	768	711.361	3	4.1348	0.0137438	4
AK071100	Os01g0742300	3-hydroxyacid dehydrogenase/reductase domain containing protein. (Os01t0742300-01), 3-hydroxyacid dehydrogenase/reductase domain containing protein. (Os01t0742300-02)	32283.6	R-GATLAESPR-A	00000000000	62	70	451.244	2	6.8832	0.000715618	4
AK071100	Os01g0742300	3-hydroxyacid dehydrogenase/reductase domain containing protein. (Os01t0742300-01), 3-hydroxyacid dehydrogenase/reductase domain containing protein. (Os01t0742300-02)	32283.6	K-SCAAVDAPVSGGDR-G	0000000000000000	132	145	688.322	2	7.50157	0.000207552	4
AK071100	Os01g0742300	3-hydroxyacid dehydrogenase/reductase domain containing protein. (Os01t0742300-01), 3-hydroxyacid dehydrogenase/reductase domain containing protein. (Os01t0742300-02)	32283.6	K-WLEAISTGAAGSK-S	000000000000000	220	232	645.843	2	7.79059	0.0340766	4
AK073858	Os01g0743500	Cytosolic NADP malic enzyme. (Os01t0743500-01)	64726.7	K-SIQVIVVTDGER-I	00000000000000	175	186	658.368	2	6.11208	6.00207e-09	2
AK067731	Os01g0749400	HAD-superfamily hydrolase subfamily IIB protein. (Os01t0749400-01), HAD-superfamily hydrolase subfamily IIB protein. (Os01t0749400-02), HAD-superfamily hydrolase subfamily IIB protein. (Os01t0749400-03)	103341	R-AVLVQIANPAR-G	0000000000000	408	418	576.351	2	4.44868	0.00050523	1
AK060095	Os01g0750000	Similar to ras-related protein RIC2. (Os01t0750000-01), Similar to Ras-related protein RIC2. (Os01t0750000-02)	24391.3	K-STIGVEFATR-S	000000000000	49	58	540.792	2	6.76878	0.000614795	3
AK060095	Os01g0750000	Similar to ras-related protein RIC2. (Os01t0750000-01), Similar to Ras-related protein RIC2. (Os01t0750000-02)	24391.3	K-AQIWDTAGQER-Y	0000000000000	69	79	637.813	2	5.14649	3.16714e-06	3
AK060095	Os01g0750000	Similar to ras-related protein RIC2. (Os01t0750000-01), Similar to Ras-related protein RIC2. (Os01t0750000-02)	24391.3	R-GAVGALLVYDVTR-R	000000000000000	90	102	667.381	2	4.98216	3.56339e-05	3
AK121755	Os01g0752300	Similar to 60S ribosomal protein L18a-1. (Os01t0752300-01)	21528.4	R-FHQYQVVGR-G	00000000000	6	14	567.299	2	4.89953	0.0237911	1
AK103612	Os01g0752800	Similar to HASP protein-like protein (Fragment). (Os01t0752800-01), Non-protein coding transcript. (Os01t0752800-02)	19149.9	K-HKGTEGLIQIENPNLVK-A	0000000000000000000	67	83	630.69	3	6.07747	0.00375284	1
AK067136	Os01g0753100	Alcohol dehydrogenase superfamily, zinc-containing protein. (Os01t0753100-01), Similar to reticulon-4-interacting protein 1. (Os01t0753100-02)	39003.6	R-FGGPEVLEVR-Q	000000000000	38	47	551.804	2	9.75438	0.0060214	3
AK067136	Os01g0753100	Alcohol dehydrogenase superfamily, zinc-containing protein. (Os01t0753100-01), Similar to reticulon-4-interacting protein 1. (Os01t0753100-02)	39003.6	R-AVSINPLDLR-M	000000000000	66	75	549.322	2	4.95975	0.00538228	3
AK067136	Os01g0753100	Alcohol dehydrogenase superfamily, zinc-containing protein. (Os01t0753100-01), Similar to reticulon-4-interacting protein 1. (Os01t0753100-02)	39003.6	K-AIDYTAEDTESAVK-G	0000000000000000	223	236	756.862	2	7.4756	0.014779	3
AK072330	Os01g0753500	Transcriptional factor B3 family protein. (Os01t0753500-01)	80954	R-SCMLGSSTSR-L	000000000000	509	518	550.241	2	-12.0302	0.0431828	1
AK067551	Os01g0754100	Nucleic acid-binding, OB-fold domain containing protein. (Os01t0754100-01), Non-protein coding transcript. (Os01t0754100-02)	15058	K-VDQLKPGTGGHTLVAK-V	000000000000000000	17	32	540.975	3	2.76722	0.0362515	1
AK121744	Os01g0757500	CS domain domain containing protein. (Os01t0757500-01), Similar to Calcyclin-binding protein. (Os01t0757500-02)	24999.1	M-SADELRLDLEELR-R	100000000000000	2	14	800.918	2	7.33158	0.0178394	2
AK121744	Os01g0757500	CS domain domain containing protein. (Os01t0757500-01), Similar to Calcyclin-binding protein. (Os01t0757500-02)	24999.1	R-VLSALANEIR-A	000000000000	25	34	543.323	2	6.26239	1.66771e-08	2
AK101274	Os01g0758300	Similar to Phosphoenolpyruvate carboxylase, housekeeping isozyme (EC 4.1.1.31) (PEPCase). (Os01t0758300-01), Similar to Phosphoenolpyruvate carboxylase, housekeeping isozyme. (Os01t0758300-02)	106101	R-QVSTFGLSLVR-L	0000000000000	395	405	603.849	2	6.08927	0.0038458	3
AK101274	Os01g0758300	Similar to Phosphoenolpyruvate carboxylase, housekeeping isozyme (EC 4.1.1.31) (PEPCase). (Os01t0758300-01), Similar to Phosphoenolpyruvate carboxylase, housekeeping isozyme. (Os01t0758300-02)	106101	K-LADLEAAPAALAR-L	000000000000000	521	533	641.37	2	13.1648	0.000853787	3
AK101274	Os01g0758300	Similar to Phosphoenolpyruvate carboxylase, housekeeping isozyme (EC 4.1.1.31) (PEPCase). (Os01t0758300-01), Similar to Phosphoenolpyruvate carboxylase, housekeeping isozyme. (Os01t0758300-02)	106101	R-KPSGGIESLR-A	000000000000	717	726	522.298	2	4.11738	0.00588077	3
AK103586	Os01g0760600	Aspartate aminotransferase, cytoplasmic (EC 2.6.1.1) (Transaminase A). (Os01t0760600-01)	50115.6	K-VNLGVGAYR-T	00000000000	87	95	474.769	2	3.96825	0.000614434	10
AK103586	Os01g0760600	Aspartate aminotransferase, cytoplasmic (EC 2.6.1.1) (Transaminase A). (Os01t0760600-01)	50115.6	R-AEQMLINNPSR-V	0000000000000	110	120	636.826	2	6.94616	2.15883e-06	10
AK103586	Os01g0760600	Aspartate aminotransferase, cytoplasmic (EC 2.6.1.1) (Transaminase A). (Os01t0760600-01)	50115.6	K-EYLPITGLADFNK-L	000000000000000	123	135	740.893	2	7.11506	0.000319773	10
AK103586	Os01g0760600	Aspartate aminotransferase, cytoplasmic (EC 2.6.1.1) (Transaminase A). (Os01t0760600-01)	50115.6	K-LIFGADSPAIQENR-V	0000000000000000	140	153	765.904	2	5.90479	9.00667e-07	10
AK103586	Os01g0760600	Aspartate aminotransferase, cytoplasmic (EC 2.6.1.1) (Transaminase A). (Os01t0760600-01)	50115.6	K-VFTLAGLTVR-S	000000000000	195	204	538.83	2	5.56391	4.09232e-05	10
AK103586	Os01g0760600	Aspartate aminotransferase, cytoplasmic (EC 2.6.1.1) (Transaminase A). (Os01t0760600-01)	50115.6	R-MFVADGGELLMAQSYAK-N	0000000000000000000	290	306	915.948	2	6.89832	2.32272e-06	10
AK103586	Os01g0760600	Aspartate aminotransferase, cytoplasmic (EC 2.6.1.1) (Transaminase A). (Os01t0760600-01)	50115.6	R-MFVADGGELLMAQSYAK-N	0000000000030000000	290	306	923.947	2	7.8024	0.00377862	10
AK103586	Os01g0760600	Aspartate aminotransferase, cytoplasmic (EC 2.6.1.1) (Transaminase A). (Os01t0760600-01)	50115.6	R-QQLFDALK-T	0000000000	383	390	481.771	2	5.14559	0.00417032	10
AK103586	Os01g0760600	Aspartate aminotransferase, cytoplasmic (EC 2.6.1.1) (Transaminase A). (Os01t0760600-01)	50115.6	R-TIPHLADAIHAAVTK-L	00000000000000000	444	458	779.446	2	6.22622	6.16249e-08	10
AK071943	Os01g0761300	Similar to Long-chain-fatty-acid-CoA ligase-like protein. (Os01t0761300-01), Hypothetical gene. (Os01t0761300-02)	38394.6	R-LYLWDSLPR-N	00000000000	314	322	581.82	2	5.79475	0.0332415	1
Os01g0762400	Os01g0762400	Similar to Import inner membrane translocase subunit TIM50. (Os01t0762400-00)	10527.3	R-AVLASYQGR-D	00000000000	67	75	482.768	2	7.27576	0.0434863	1
AK063778	Os01g0763300	Conserved hypothetical protein. (Os01t0763300-01)	15576.9	M-AASASAAGAGAGK-S	100000000000000	2	14	516.262	2	5.50592	8.05035e-07	3
AK059818	Os01g0764000	Similar to Glutathione S-transferase I (EC 2.5.1.18) (GST-I) (GST-29) (GST class- phi). (Os01t0764000-01), Similar to Glutathione s-transferase ii (Fragment). (Os01t0764000-02)	24387.4	K-GEHKAPDHLAR-N	0000000000000	39	49	615.823	2	4.81713	0.0116781	3
AK059818	Os01g0764000	Similar to Glutathione S-transferase I (EC 2.5.1.18) (GST-I) (GST-29) (GST class- phi). (Os01t0764000-01), Similar to Glutathione s-transferase ii (Fragment). (Os01t0764000-02)	24387.4	K-KVLEVYEAR-L	00000000000	142	150	553.817	2	6.60777	0.00514402	3
AK059818	Os01g0764000	Similar to Glutathione S-transferase I (EC 2.5.1.18) (GST-I) (GST-29) (GST class- phi). (Os01t0764000-01), Similar to Glutathione s-transferase ii (Fragment). (Os01t0764000-02)	24387.4	K-VASLMKPPA--	00000300000	207	215	465.263	2	6.4211	0.00945818	3
AK068983	Os01g0764400	Similar to Chorismate mutase, chloroplast precursor (EC 5.4.99.5) (CM-1). (Os01t0764400-01)	35736.2	R-QEDSIIFSLLER-A	00000000000000	78	89	725.388	2	7.81995	0.00366692	4
AK068983	Os01g0764400	Similar to Chorismate mutase, chloroplast precursor (EC 5.4.99.5) (CM-1). (Os01t0764400-01)	35736.2	R-ETEKLHQQVGR-Y	0000000000000	120	130	662.855	2	4.54775	0.00186869	4
AK068983	Os01g0764400	Similar to Chorismate mutase, chloroplast precursor (EC 5.4.99.5) (CM-1). (Os01t0764400-01)	35736.2	K-MYFDELLPR-L	00000000000	174	182	592.297	2	4.23605	1.75309e-05	4
AK068983	Os01g0764400	Similar to Chorismate mutase, chloroplast precursor (EC 5.4.99.5) (CM-1). (Os01t0764400-01)	35736.2	K-EVQVAYLLR-R	00000000000	302	310	545.819	2	5.05937	0.00025817	4
AK070672	Os01g0767600	Conserved hypothetical protein. (Os01t0767600-01)	45501.4	R-LSSLISIAQTLR-G	00000000000000	210	221	651.398	2	7.61823	0.0287934	1
AK106478	Os01g0771100	Mitochondrial glycoprotein family protein. (Os01t0771100-01)	26225.3	R-SLKEHFLEVSK-M	0000000000000	43	53	658.868	2	5.66957	3.39176e-05	7
AK106478	Os01g0771100	Mitochondrial glycoprotein family protein. (Os01t0771100-01)	26225.3	K-GALDQASGPVLR-R	00000000000000	71	82	592.328	2	5.69532	1.15215e-05	7
AK106478	Os01g0771100	Mitochondrial glycoprotein family protein. (Os01t0771100-01)	26225.3	R-RGYGDAGEEISISVAR-L	000000000000000000	83	98	560.62	3	6.91734	0.00258631	7
AK106478	Os01g0771100	Mitochondrial glycoprotein family protein. (Os01t0771100-01)	26225.3	R-GYGDAGEEISISVAR-L	00000000000000000	84	98	762.373	2	3.09166	0.0376575	7
AK106478	Os01g0771100	Mitochondrial glycoprotein family protein. (Os01t0771100-01)	26225.3	K-TAESGTAGLAGK-G	00000000000000	165	176	531.777	2	4.20665	0.000778706	7
AK106478	Os01g0771100	Mitochondrial glycoprotein family protein. (Os01t0771100-01)	26225.3	R-IFQELDENVR-D	000000000000	185	194	631.825	2	3.75025	0.00200631	7
AK106478	Os01g0771100	Mitochondrial glycoprotein family protein. (Os01t0771100-01)	26225.3	K-SVGTLISEPK-S	000000000000	232	241	515.796	2	6.42696	0.00360301	7
AK120871	Os01g0772800	Similar to Signal recognition particle 54 kDa protein 2 (SRP54). (Os01t0772800-01)	55145.1	M-VLAQLGGSISR-A	0000000000000	2	12	550.827	2	4.68296	3.83803e-05	4
AK120871	Os01g0772800	Similar to Signal recognition particle 54 kDa protein 2 (SRP54). (Os01t0772800-01)	55145.1	R-ALAQMSNATVIDEK-V	0000000000000000	13	26	745.886	2	8.91155	0.000157853	4
AK120871	Os01g0772800	Similar to Signal recognition particle 54 kDa protein 2 (SRP54). (Os01t0772800-01)	55145.1	K-GGGALSAVAATK-S	00000000000000	256	267	501.786	2	7.36967	0.0018745	4
AK120871	Os01g0772800	Similar to Signal recognition particle 54 kDa protein 2 (SRP54). (Os01t0772800-01)	55145.1	K-LSEGTFTLR-L	00000000000	323	331	512.282	2	9.04776	0.0015035	4
AK101217	Os01g0775100	Plus-3 domain containing protein. (Os01t0775100-01)	88070.5	K-EGAPNSMENQPDNK-Q	0000000300000000	631	644	516.224	3	9.16398	0.0409114	1
J013062N16	Os01g0777700	Similar to predicted protein. (Os01t0777700-00)	9257.72	K-YGGVLTHAGR-K	000000000000	42	51	515.777	2	4.17331	1.90039e-05	1
AK059870	Os01g0781000	Vacuolar protein sorting-associated, VPS28 family protein. (Os01t0781000-01), Vacuolar protein sorting-associated, VPS28 family protein. (Os01t0781000-02)	23181.9	K-MGAGDELTEQQAR-Q	000000000000000	179	191	703.324	2	2.87421	0.00390793	1
AK072280	Os01g0783500	Rossmann-like alpha/beta/alpha sandwich fold domain containing protein. (Os01t0783500-01)	27836.7	R-LAAAQAASAAAIHPTSPR-Y	00000000000000000000	28	45	568.649	3	7.93636	0.000406591	2
AK072280	Os01g0783500	Rossmann-like alpha/beta/alpha sandwich fold domain containing protein. (Os01t0783500-01)	27836.7	R-YFFSSLAGTNASPHR-R	00000000000000000	46	60	827.906	2	3.94973	5.9017e-05	2
Os01g0791600	Os01g0791600	0	41918.2	K-DTDILAAFR-V	00000000000	33	41	511.273	2	7.06668	0.000144893	1
Os01g0796500	Os01g0796500	Similar to predicted protein. (Os01t0796500-01)	23246	R-FNPAGVAAVAAVAASEPR-L	00000000000000000000	15	32	849.454	2	2.64876	7.40555e-06	2
AK072822	Os01g0799900	Similar to Latex-abundant protein. (Os01t0799900-01)	46424.8	R-SLPLSTLIEMLKEK-T	0000000000000000	227	240	801.471	2	10.0029	0.0270074	3
AK072822	Os01g0799900	Similar to Latex-abundant protein. (Os01t0799900-01)	46424.8	R-MTLFNIFGDDASPK-V	0300000000000000	253	266	786.38	2	7.90902	0.00536056	3
AK072822	Os01g0799900	Similar to Latex-abundant protein. (Os01t0799900-01)	46424.8	R-GNVSNKDLVMK-A	0000000000000	378	388	602.826	2	7.90029	0.0460324	3
Os01g0800266	Os01g0800266	#N/A	40147.8	K-FSLAPLVPR-L	00000000000	145	153	500.307	2	8.76961	0.00293948	5
Os01g0800266	Os01g0800266	#N/A	40147.8	R-FYKEEEKNDPEFAK-K	0000000000000000	193	206	887.425	2	5.42243	0.000105704	5
Os01g0800266	Os01g0800266	#N/A	40147.8	R-FYKEEEKNDPEFAKK-L	00000000000000000	193	207	634.651	3	5.72125	0.0241961	5
Os01g0800266	Os01g0800266	#N/A	40147.8	K-RPFAAIVGGSK-V	0000000000000	229	239	551.825	2	4.78141	0.0237418	5
AK073318	Os01g0801600	Similar to Glycerol-3-phosphate dehydrogenase-like protein (Fragment). (Os01t0801600-01)	60639.2	R-ITAPIILSLAK-G	0000000000000	270	280	570.381	2	12.3032	0.00215323	1
AK061770	Os01g0803200	Cysteine proteinase inhibitor-I (Oryzacystatin-I). (Os01t0803200-01), Similar to Cysteine protease inhibitor. (Os01t0803200-02)	15345.9	K-ANSLLEFEK-L	00000000000	76	84	525.781	2	8.00428	0.00271256	1
AK103408	Os01g0805800	DNA-directed RNA polymerase, RPB5 subunit domain containing protein. (Os01t0805800-01)	24890.3	R-IQITDPIAR-Y	00000000000	173	181	513.804	2	6.61633	0.000418742	1
L19598	Os01g0805900	Tubulin beta-2 chain (Beta-2 tubulin). (Os01t0805900-01)	51109.2	R-YTGNSDLQLER-V	0000000000000	36	46	648.318	2	4.90654	2.95753e-05	12
L19598	Os01g0805900	Tubulin beta-2 chain (Beta-2 tubulin). (Os01t0805900-01)	51109.2	K-GHYTEGAELIDSVLDVVR-K	00000000000000000000	104	121	658.342	3	6.96649	0.046161	12
L19598	Os01g0805900	Tubulin beta-2 chain (Beta-2 tubulin). (Os01t0805900-01)	51109.2	R-KLAVNLIPFPR-L	0000000000000	252	262	634.404	2	10.312	0.00943005	12
L19598	Os01g0805900	Tubulin beta-2 chain (Beta-2 tubulin). (Os01t0805900-01)	51109.2	K-LAVNLIPFPR-L	000000000000	253	262	570.352	2	2.68168	3.47098e-05	12
L19598	Os01g0805900	Tubulin beta-2 chain (Beta-2 tubulin). (Os01t0805900-01)	51109.2	R-LHFFMVGFAPLTSR-G	0000030000000000	263	276	819.929	2	2.60449	3.57288e-06	12
L19598	Os01g0805900	Tubulin beta-2 chain (Beta-2 tubulin). (Os01t0805900-01)	51109.2	R-LHFFMVGFAPLTSR-G	0000000000000000	263	276	811.936	2	8.67679	0.0109113	12
L19598	Os01g0805900	Tubulin beta-2 chain (Beta-2 tubulin). (Os01t0805900-01)	51109.2	R-YLTASAMFR-G	00000000000	310	318	530.271	2	5.13605	6.13077e-05	12
L19598	Os01g0805900	Tubulin beta-2 chain (Beta-2 tubulin). (Os01t0805900-01)	51109.2	K-EVDEQMINVQNK-N	00000000000000	325	336	723.85	2	1.82773	0.0011133	12
L19598	Os01g0805900	Tubulin beta-2 chain (Beta-2 tubulin). (Os01t0805900-01)	51109.2	K-EVDEQMINVQNK-N	00000030000000	325	336	731.849	2	4.02201	0.0044319	12
L19598	Os01g0805900	Tubulin beta-2 chain (Beta-2 tubulin). (Os01t0805900-01)	51109.2	K-NSSYFVEWIPNNVK-S	0000000000000000	337	350	848.924	2	4.60289	0.00267324	12
L19598	Os01g0805900	Tubulin beta-2 chain (Beta-2 tubulin). (Os01t0805900-01)	51109.2	R-RVSEQFTAMFR-R	0000000000000	380	390	686.349	2	4.3491	0.00425129	12
L19598	Os01g0805900	Tubulin beta-2 chain (Beta-2 tubulin). (Os01t0805900-01)	51109.2	R-VSEQFTAMFR-R	000000000000	381	390	608.298	2	4.92686	2.78662e-07	12
L19598	Os01g0805900	Tubulin beta-2 chain (Beta-2 tubulin). (Os01t0805900-01)	51109.2	R-VSEQFTAMFR-R	000000003000	381	390	616.297	2	6.7143	7.11268e-05	12
AK103541	Os01g0811100	Proteasome subunit alpha type 3 (EC 3.4.25.1) (20S proteasome alpha subunit G) (20S proteasome subunit alpha-7). (Os01t0811100-01), Proteasome subunit alpha type 3 (EC 3.4.25.1) (20S proteasome alpha subunit G) (20S proteasome subunit alpha-7). (Os01t0811100-02)	27576	R-VFQVEYATK-A	00000000000	21	29	542.791	2	6.60383	6.1504e-06	4
AK103541	Os01g0811100	Proteasome subunit alpha type 3 (EC 3.4.25.1) (20S proteasome alpha subunit G) (20S proteasome subunit alpha-7). (Os01t0811100-01), Proteasome subunit alpha type 3 (EC 3.4.25.1) (20S proteasome alpha subunit G) (20S proteasome subunit alpha-7). (Os01t0811100-02)	27576	K-AVDNSGTVVGIK-C	00000000000000	30	41	580.323	2	6.01562	0.00124483	4
AK103541	Os01g0811100	Proteasome subunit alpha type 3 (EC 3.4.25.1) (20S proteasome alpha subunit G) (20S proteasome subunit alpha-7). (Os01t0811100-01), Proteasome subunit alpha type 3 (EC 3.4.25.1) (20S proteasome alpha subunit G) (20S proteasome subunit alpha-7). (Os01t0811100-02)	27576	K-VPADLLEQAK-V	000000000000	227	236	542.309	2	5.1585	7.82123e-05	4
AK103541	Os01g0811100	Proteasome subunit alpha type 3 (EC 3.4.25.1) (20S proteasome alpha subunit G) (20S proteasome subunit alpha-7). (Os01t0811100-01), Proteasome subunit alpha type 3 (EC 3.4.25.1) (20S proteasome alpha subunit G) (20S proteasome subunit alpha-7). (Os01t0811100-02)	27576	K-VAAQAALEEMDAD--	000000000000000	237	249	667.304	2	4.98424	0.00432428	4
AK062929	Os01g0812800	Ribosomal protein L30e domain containing protein. (Os01t0812800-01)	12673.6	R-KSEIEYYAMLGK-V	00000000000000	57	68	716.368	2	6.9978	0.022777	3
AK062929	Os01g0812800	Ribosomal protein L30e domain containing protein. (Os01t0812800-01)	12673.6	K-SEIEYYAMLGK-V	0000000000000	58	68	652.319	2	4.6764	1.1613e-06	3
AK062929	Os01g0812800	Ribosomal protein L30e domain containing protein. (Os01t0812800-01)	12673.6	K-SEIEYYAMLGK-V	0000000030000	58	68	660.317	2	5.51478	0.00116181	3
AK121582	Os01g0812900	Conserved hypothetical protein. (Os01t0812900-01)	35172.1	R-VAADPQFPFK-V	000000000000	103	112	560.299	2	5.74515	0.00144193	4
AK121582	Os01g0812900	Conserved hypothetical protein. (Os01t0812900-01)	35172.1	R-MDPAFETPNK-A	000000000000	229	238	575.27	2	7.31048	0.0201651	4
AK121582	Os01g0812900	Conserved hypothetical protein. (Os01t0812900-01)	35172.1	K-SDAPAASATAEEEKER-L	000000000000000000	311	326	831.389	2	5.89435	0.000180435	4
AK065370	Os01g0813400	Similar to ADP-ribosylation factor 1. (Os01t0813400-01)	20738.8	R-ILMVGLDAAGK-T	0000000000000	20	30	544.315	2	4.35869	4.85751e-08	10
AK065370	Os01g0813400	Similar to ADP-ribosylation factor 1. (Os01t0813400-01)	20738.8	R-ILMVGLDAAGK-T	0003000000000	20	30	552.313	2	5.90878	5.50735e-05	10
AK065370	Os01g0813400	Similar to ADP-ribosylation factor 1. (Os01t0813400-01)	20738.8	K-NISFTVWDVGGQDK-I	0000000000000000	60	73	783.389	2	7.5384	3.21346e-08	10
AK065370	Os01g0813400	Similar to ADP-ribosylation factor 1. (Os01t0813400-01)	20738.8	R-HYFQNTQGLIFVVDSNDR-E	00000000000000000000	80	97	1077.03	2	7.25373	0.000306953	10
AK065370	Os01g0813400	Similar to ADP-ribosylation factor 1. (Os01t0813400-01)	20738.8	R-HYFQNTQGLIFVVDSNDRER-V	0000000000000000000000	80	99	813.403	3	3.39602	0.0478429	10
AK065370	Os01g0813400	Similar to ADP-ribosylation factor 1. (Os01t0813400-01)	20738.8	R-MLNEDELR-D	0000000000	110	117	510.248	2	5.79816	0.00111463	10
AK065370	Os01g0813400	Similar to ADP-ribosylation factor 1. (Os01t0813400-01)	20738.8	R-DAVLLVFANK-Q	000000000000	118	127	545.323	2	7.30026	2.0771e-06	10
AK065370	Os01g0813400	Similar to ADP-ribosylation factor 1. (Os01t0813400-01)	20738.8	K-QDLPNAMNAAEITDK-L	00000000000000000	128	142	815.896	2	6.81949	0.000425526	10
AK065370	Os01g0813400	Similar to ADP-ribosylation factor 1. (Os01t0813400-01)	20738.8	K-QDLPNAMNAAEITDK-L	00000003000000000	128	142	823.893	2	6.28055	0.0169324	10
AK071859	Os01g0814900	Similar to Cytochrome b5 reductase. (Os01t0814900-01), Similar to Cytochrome b5 reductase. (Os01t0814900-02)	31217.1	R-AILENPNDITK-V	0000000000000	172	182	614.335	2	4.14513	0.0310384	1
AK073519	Os01g0815700	Zinc finger, RanBP2-type domain containing protein. (Os01t0815700-01)	104288	K-KVAELSNVK-D	00000000000	526	534	494.301	2	10.6302	0.00301172	1
AK121331	Os01g0816400	Similar to microtubule organization protein. (Os01t0816400-01), Similar to Microtubule bundling polypeptide TMBP200. (Os01t0816400-02)	222258	K-TVADSNAPVQEK-A	00000000000000	61	72	629.82	2	3.87492	0.000711496	3
AK121331	Os01g0816400	Similar to microtubule organization protein. (Os01t0816400-01), Similar to Microtubule bundling polypeptide TMBP200. (Os01t0816400-02)	222258	R-VLLPVLLEK-L	00000000000	367	375	512.345	2	1.40335	0.00469862	3
AK121331	Os01g0816400	Similar to microtubule organization protein. (Os01t0816400-01), Similar to Microtubule bundling polypeptide TMBP200. (Os01t0816400-02)	222258	R-IQPTGTVELFTALR-A	0000000000000000	888	901	773.44	2	5.9481	0.00136766	3
AK065059	Os01g0817700	Similar to 2,3-bisphosphoglycerate-independent phosphoglycerate mutase (EC 5.4.2.1) (Phosphoglyceromutase) (BPG-independent PGAM) (PGAM-I). (Os01t0817700-01), Similar to 2,3-bisphosphoglycerate-independent phosphoglycerate mutase (EC 5.4.2.1) (Phosphoglyceromutase) (BPG-independent PGAM) (PGAM-I). (Os01t0817700-02)	61036.1	M-ASSGFSWTLPDHPKLPK-G	1000000000000000000	2	18	637.334	3	3.90847	0.0057188	10
AK065059	Os01g0817700	Similar to 2,3-bisphosphoglycerate-independent phosphoglycerate mutase (EC 5.4.2.1) (Phosphoglyceromutase) (BPG-independent PGAM) (PGAM-I). (Os01t0817700-01), Similar to 2,3-bisphosphoglycerate-independent phosphoglycerate mutase (EC 5.4.2.1) (Phosphoglyceromutase) (BPG-independent PGAM) (PGAM-I). (Os01t0817700-02)	61036.1	K-LVDLALASGK-I	000000000000	100	109	493.8	2	3.95707	0.00137409	10
AK065059	Os01g0817700	Similar to 2,3-bisphosphoglycerate-independent phosphoglycerate mutase (EC 5.4.2.1) (Phosphoglyceromutase) (BPG-independent PGAM) (PGAM-I). (Os01t0817700-01), Similar to 2,3-bisphosphoglycerate-independent phosphoglycerate mutase (EC 5.4.2.1) (Phosphoglyceromutase) (BPG-independent PGAM) (PGAM-I). (Os01t0817700-02)	61036.1	R-VHILTDGR-D	0000000000	163	170	455.762	2	6.54728	0.00478009	10
AK065059	Os01g0817700	Similar to 2,3-bisphosphoglycerate-independent phosphoglycerate mutase (EC 5.4.2.1) (Phosphoglyceromutase) (BPG-independent PGAM) (PGAM-I). (Os01t0817700-01), Similar to 2,3-bisphosphoglycerate-independent phosphoglycerate mutase (EC 5.4.2.1) (Phosphoglyceromutase) (BPG-independent PGAM) (PGAM-I). (Os01t0817700-02)	61036.1	K-FQNAVEAVK-T	00000000000	237	245	503.275	2	6.30371	0.000131956	10
AK065059	Os01g0817700	Similar to 2,3-bisphosphoglycerate-independent phosphoglycerate mutase (EC 5.4.2.1) (Phosphoglyceromutase) (BPG-independent PGAM) (PGAM-I). (Os01t0817700-01), Similar to 2,3-bisphosphoglycerate-independent phosphoglycerate mutase (EC 5.4.2.1) (Phosphoglyceromutase) (BPG-independent PGAM) (PGAM-I). (Os01t0817700-02)	61036.1	K-ALEYADFDKFDR-V	00000000000000	296	307	745.356	2	6.35669	0.00013534	10
AK065059	Os01g0817700	Similar to 2,3-bisphosphoglycerate-independent phosphoglycerate mutase (EC 5.4.2.1) (Phosphoglyceromutase) (BPG-independent PGAM) (PGAM-I). (Os01t0817700-01), Similar to 2,3-bisphosphoglycerate-independent phosphoglycerate mutase (EC 5.4.2.1) (Phosphoglyceromutase) (BPG-independent PGAM) (PGAM-I). (Os01t0817700-02)	61036.1	R-YAGMLQYDGELK-L	00000000000000	315	326	694.336	2	6.05039	2.12134e-05	10
AK065059	Os01g0817700	Similar to 2,3-bisphosphoglycerate-independent phosphoglycerate mutase (EC 5.4.2.1) (Phosphoglyceromutase) (BPG-independent PGAM) (PGAM-I). (Os01t0817700-01), Similar to 2,3-bisphosphoglycerate-independent phosphoglycerate mutase (EC 5.4.2.1) (Phosphoglyceromutase) (BPG-independent PGAM) (PGAM-I). (Os01t0817700-02)	61036.1	K-LPSHYLVSPPEIER-T	0000000000000000	327	340	818.944	2	7.08107	0.00212801	10
AK065059	Os01g0817700	Similar to 2,3-bisphosphoglycerate-independent phosphoglycerate mutase (EC 5.4.2.1) (Phosphoglyceromutase) (BPG-independent PGAM) (PGAM-I). (Os01t0817700-01), Similar to 2,3-bisphosphoglycerate-independent phosphoglycerate mutase (EC 5.4.2.1) (Phosphoglyceromutase) (BPG-independent PGAM) (PGAM-I). (Os01t0817700-02)	61036.1	K-ARDAILSGKFDQVR-V	0000000000000000	410	423	525.961	3	4.32669	0.000637847	10
AK065059	Os01g0817700	Similar to 2,3-bisphosphoglycerate-independent phosphoglycerate mutase (EC 5.4.2.1) (Phosphoglyceromutase) (BPG-independent PGAM) (PGAM-I). (Os01t0817700-01), Similar to 2,3-bisphosphoglycerate-independent phosphoglycerate mutase (EC 5.4.2.1) (Phosphoglyceromutase) (BPG-independent PGAM) (PGAM-I). (Os01t0817700-02)	61036.1	R-DAILSGKFDQVR-V	00000000000000	412	423	674.869	2	7.07322	0.0051525	10
Os01g0819200	Os01g0819200	Similar to calcium lipid binding protein-like. (Os01t0819200-00)	50651.8	K-KPVGILLVK-V	00000000000	223	231	483.842	2	5.04401	0.00412098	1
Os01g0819400	Os01g0819400	Similar to Ubiquitin carrier protein. (Os01t0819400-00)	16719.4	K-EQWSPALTISK-V	0000000000000	91	101	630.338	2	4.0748	0.0358907	1
AK060539	Os01g0821700	Similar to Chitin-binding lectin 1 precursor (PL-I). (Os01t0821700-01)	35642.6	R-EVLLEASEKLK-I	0000000000000	142	152	629.871	2	7.09352	0.000412442	4
AK060539	Os01g0821700	Similar to Chitin-binding lectin 1 precursor (PL-I). (Os01t0821700-01)	35642.6	K-DLSVIATEVGEEGQEYLK-L	00000000000000000000	161	178	990.502	2	8.19433	0.000177137	4
AK060539	Os01g0821700	Similar to Chitin-binding lectin 1 precursor (PL-I). (Os01t0821700-01)	35642.6	K-LAAQNSPDSIKDIIETFNSLGK-L	000000000000000000000000	179	200	787.754	3	7.66779	0.00352422	4
AK060539	Os01g0821700	Similar to Chitin-binding lectin 1 precursor (PL-I). (Os01t0821700-01)	35642.6	K-GQAAIASVIFFR-E	00000000000000	270	281	640.365	2	6.02625	2.40537e-08	4
AK119168	Os01g0821800	Nucleic acid-binding, OB-fold-like domain containing protein. (Os01t0821800-01), Similar to methionyl-tRNA synthetase. (Os01t0821800-02)	44283.8	K-SAGKPNEGVADKAPQK-T	000000000000000000	224	239	532.952	3	4.72588	0.00761377	2
AK119168	Os01g0821800	Nucleic acid-binding, OB-fold-like domain containing protein. (Os01t0821800-01), Similar to methionyl-tRNA synthetase. (Os01t0821800-02)	44283.8	K-FFSPEELVNR-H	000000000000	293	302	619.318	2	6.5007	0.019332	2
J075185I15	Os01g0828100	Similar to Cinnamoyl-CoA reductase. (Os01t0828100-00)	20787.5	R-HLQALDGADTR-L	0000000000000	51	61	598.807	2	4.41294	3.31362e-05	1
AK101730	Os01g0829800	Similar to Malate dehydrogenase precursor (EC 1.1.1.37). (Os01t0829800-01), Similar to Malate dehydrogenase precursor (EC 1.1.1.37). (Os01t0829800-02)	42116.3	K-VAVLGAAGGIGQPLGLLIK-M	000000000000000000000	78	96	874.055	2	10.4181	0.00015961	7
AK101730	Os01g0829800	Similar to Malate dehydrogenase precursor (EC 1.1.1.37). (Os01t0829800-01), Similar to Malate dehydrogenase precursor (EC 1.1.1.37). (Os01t0829800-02)	42116.3	K-GVDVVVIPAGVPR-K	000000000000000	143	155	639.386	2	6.28493	0.000490108	7
AK101730	Os01g0829800	Similar to Malate dehydrogenase precursor (EC 1.1.1.37). (Os01t0829800-01), Similar to Malate dehydrogenase precursor (EC 1.1.1.37). (Os01t0829800-02)	42116.3	R-DDLFNINASIVK-T	00000000000000	162	173	674.863	2	5.83304	5.46316e-05	7
AK101730	Os01g0829800	Similar to Malate dehydrogenase precursor (EC 1.1.1.37). (Os01t0829800-01), Similar to Malate dehydrogenase precursor (EC 1.1.1.37). (Os01t0829800-02)	42116.3	K-KLFGVTTLDVVR-A	00000000000000	216	227	674.408	2	6.15503	1.34672e-05	7
AK101730	Os01g0829800	Similar to Malate dehydrogenase precursor (EC 1.1.1.37). (Os01t0829800-01), Similar to Malate dehydrogenase precursor (EC 1.1.1.37). (Os01t0829800-02)	42116.3	K-LFGVTTLDVVR-A	0000000000000	217	227	610.36	2	6.09313	2.57766e-06	7
AK101730	Os01g0829800	Similar to Malate dehydrogenase precursor (EC 1.1.1.37). (Os01t0829800-01), Similar to Malate dehydrogenase precursor (EC 1.1.1.37). (Os01t0829800-02)	42116.3	R-RIQNAGTEVVEAK-A	000000000000000	280	292	707.891	2	6.71007	0.000379443	7
AK101730	Os01g0829800	Similar to Malate dehydrogenase precursor (EC 1.1.1.37). (Os01t0829800-01), Similar to Malate dehydrogenase precursor (EC 1.1.1.37). (Os01t0829800-02)	42116.3	R-IQNAGTEVVEAK-A	00000000000000	281	292	629.839	2	5.71892	0.000983678	7
AK121629	Os01g0833200	Conserved hypothetical protein. (Os01t0833200-01)	20788.5	R-AVEATPESFAPFGQVVAAYGGK-R	000000000000000000000000	13	34	1098.56	2	9.46601	0.000246297	2
AK121629	Os01g0833200	Conserved hypothetical protein. (Os01t0833200-01)	20788.5	R-FGPNDAQLDLSR-G	00000000000000	36	47	666.836	2	8.30414	0.0172854	2
Z67962	Os01g0833700	Clathrin adaptor, mu subunit, C-terminal domain containing protein. (Os01t0833700-01)	57447.6	M-VVLAASIISK-S	000000000000	2	11	500.825	2	3.2107	1.45644e-05	3
Z67962	Os01g0833700	Clathrin adaptor, mu subunit, C-terminal domain containing protein. (Os01t0833700-01)	57447.6	K-QHTYVETENVR-Y	2000000000000	45	55	679.824	2	5.24915	0.0305949	3
Z67962	Os01g0833700	Clathrin adaptor, mu subunit, C-terminal domain containing protein. (Os01t0833700-01)	57447.6	K-QSNILEDLDTLR-L	00000000000000	73	84	708.872	2	2.81221	0.000115725	3
AK058829	Os01g0834500	Similar to 40S ribosomal protein S23 (S12). (Os01t0834500-01)	15792.7	R-KGHAVGDIPGVR-F	00000000000000	107	118	603.344	2	4.37893	5.36817e-05	2
AK058829	Os01g0834500	Similar to 40S ribosomal protein S23 (S12). (Os01t0834500-01)	15792.7	K-VSGVSLLALFK-E	0000000000000	124	134	567.352	2	3.90851	0.0201906	2
AK064222	Os01g0835600	AT hook, DNA-binding, conserved site domain containing protein. (Os01t0835600-01), AT hook, DNA-binding, conserved site domain containing protein. (Os01t0835600-02), AT hook, DNA-binding, conserved site domain containing protein. (Os01t0835600-03), AT hook, DNA-binding, conserved site domain containing protein. (Os01t0835600-04), AT hook, DNA-binding, conserved site domain containing protein. (Os…	31604	K-LAKAERLKR-E	00000000000	260	268	542.848	2	-5.17548	0.0124873	1
J065188E06	Os01g0835900	Histone-fold domain containing protein. (Os01t0835900-00)	11402.4	R-DNIQGITKPAIR-R	00000000000000	25	36	663.384	2	5.45009	0.00111726	3
J065188E06	Os01g0835900	Histone-fold domain containing protein. (Os01t0835900-00)	11402.4	R-ISGLIYEETR-G	000000000000	47	56	590.818	2	7.11132	0.0314242	3
J065188E06	Os01g0835900	Histone-fold domain containing protein. (Os01t0835900-00)	11402.4	K-IFLENVIR-D	0000000000	61	68	502.305	2	9.92524	0.00042114	3
J065188E06	Os01g0835900	Histone-fold domain containing protein. (Os01t0835900-00)	11402.4	R-DAVTYTEHAR-R	000000000000	69	78	581.783	2	8.42668	0.00628569	3
AB079063	Os01g0837300	Similar to UDP-glucuronic acid decarboxylase 1. (Os01t0837300-01), Similar to UDP-glucuronic acid decarboxylase 1. (Os01t0837300-02), Similar to UDP-glucuronic acid decarboxylase 1. (Os01t0837300-03)	46015.9	R-IFNTYGPR-M	0000000000	270	277	484.256	2	4.70619	0.00197966	1
AK105439	Os01g0837500	Similar to Ruvbl1 protein. (Os01t0837500-01), Similar to DNA helicase, TBP-interacting protein. (Os01t0837500-02)	49922.3	R-EAAGLVVDMIR-Q	0000000000000	47	57	587.322	2	5.88944	0.000634277	8
AK105439	Os01g0837500	Similar to Ruvbl1 protein. (Os01t0837500-01), Similar to DNA helicase, TBP-interacting protein. (Os01t0837500-02)	49922.3	R-ALLLAGPPATGK-T	00000000000000	65	76	554.843	2	6.33692	0.00760498	8
AK105439	Os01g0837500	Similar to Ruvbl1 protein. (Os01t0837500-01), Similar to DNA helicase, TBP-interacting protein. (Os01t0837500-02)	49922.3	K-TALALGISQELGSK-V	0000000000000000	77	90	694.397	2	5.53574	9.05735e-05	8
AK105439	Os01g0837500	Similar to Ruvbl1 protein. (Os01t0837500-01), Similar to DNA helicase, TBP-interacting protein. (Os01t0837500-02)	49922.3	K-SISHVIIGLK-T	000000000000	153	162	533.838	2	5.85478	0.00119432	8
AK105439	Os01g0837500	Similar to Ruvbl1 protein. (Os01t0837500-01), Similar to DNA helicase, TBP-interacting protein. (Os01t0837500-02)	49922.3	K-VAVGDVIYIEANSGAVK-R	0000000000000000000	185	201	852.968	2	6.65617	0.00177154	8
AK105439	Os01g0837500	Similar to Ruvbl1 protein. (Os01t0837500-01), Similar to DNA helicase, TBP-interacting protein. (Os01t0837500-02)	49922.3	R-ALESPLSPIVILATNR-G	000000000000000000	318	333	847.5	2	4.17817	0.00020957	8
AK105439	Os01g0837500	Similar to Ruvbl1 protein. (Os01t0837500-01), Similar to DNA helicase, TBP-interacting protein. (Os01t0837500-02)	49922.3	R-TETYGPTEMIQILAIR-A	000000000000000000	362	377	918.487	2	5.41543	0.0429718	8
AK105439	Os01g0837500	Similar to Ruvbl1 protein. (Os01t0837500-01), Similar to DNA helicase, TBP-interacting protein. (Os01t0837500-02)	49922.3	R-HAIQLLSPASVVAK-A	0000000000000000	404	417	717.43	2	4.25756	2.58534e-08	8
016-033-C09	Os01g0840100	Heat shock protein Hsp70 family protein. (Os01t0840100-01)	71404.2	R-VEIIANDQGNR-T	0000000000000	28	38	614.821	2	5.72931	0.0289817	21
016-033-C09	Os01g0840100	Heat shock protein Hsp70 family protein. (Os01t0840100-01)	71404.2	R-TTPSYVAFTDSER-L	000000000000000	39	51	737.351	2	6.18633	0.0070081	21
016-033-C09	Os01g0840100	Heat shock protein Hsp70 family protein. (Os01t0840100-01)	71404.2	K-NQVAMNPINTVFDAK-R	00000000000000000	59	73	831.423	2	4.13027	3.70946e-05	21
016-033-C09	Os01g0840100	Heat shock protein Hsp70 family protein. (Os01t0840100-01)	71404.2	K-NQVAMNPINTVFDAK-R	00000300000000000	59	73	839.42	2	3.41248	3.85001e-07	21
016-033-C09	Os01g0840100	Heat shock protein Hsp70 family protein. (Os01t0840100-01)	71404.2	K-QFSAEEISSMVLIK-M	0000000000000000	116	129	791.418	2	6.25586	0.000158178	21
016-033-C09	Os01g0840100	Heat shock protein Hsp70 family protein. (Os01t0840100-01)	71404.2	K-QFSAEEISSMVLIK-M	0000000000300000	116	129	799.413	2	2.65382	0.00394345	21
016-033-C09	Os01g0840100	Heat shock protein Hsp70 family protein. (Os01t0840100-01)	71404.2	K-NAVVTVPAYFNDSQR-Q	00000000000000000	144	158	840.925	2	4.65678	9.41716e-05	21
016-033-C09	Os01g0840100	Heat shock protein Hsp70 family protein. (Os01t0840100-01)	71404.2	K-DAGVIAGLNVMR-I	00000000000000	163	174	608.333	2	5.41891	4.01539e-08	21
016-033-C09	Os01g0840100	Heat shock protein Hsp70 family protein. (Os01t0840100-01)	71404.2	K-DAGVIAGLNVMR-I	00000000000300	163	174	616.331	2	6.01544	5.9404e-08	21
016-033-C09	Os01g0840100	Heat shock protein Hsp70 family protein. (Os01t0840100-01)	71404.2	K-ATAGDTHLGGEDFDNR-M	000000000000000000	226	241	559.251	3	4.9161	0.000403445	21
016-033-C09	Os01g0840100	Heat shock protein Hsp70 family protein. (Os01t0840100-01)	71404.2	R-FEELNMDLFR-K	000000000000	307	316	657.316	2	3.61774	0.00169636	21
016-033-C09	Os01g0840100	Heat shock protein Hsp70 family protein. (Os01t0840100-01)	71404.2	K-SSVHDVVLVGGSTR-I	0000000000000000	334	347	706.882	2	5.65441	1.63346e-06	21
016-033-C09	Os01g0840100	Heat shock protein Hsp70 family protein. (Os01t0840100-01)	71404.2	K-NKITITNDKGR-L	0000000000000	504	514	630.362	2	7.53694	0.0321929	21
016-033-C09	Os01g0840100	Heat shock protein Hsp70 family protein. (Os01t0840100-01)	71404.2	K-ITITNDKGR-L	00000000000	506	514	509.291	2	5.67554	0.00254543	21
016-033-C09	Os01g0840100	Heat shock protein Hsp70 family protein. (Os01t0840100-01)	71404.2	R-LSKEEIEK-M	0000000000	515	522	488.275	2	6.84758	0.00562877	21
016-033-C09	Os01g0840100	Heat shock protein Hsp70 family protein. (Os01t0840100-01)	71404.2	K-NALENYAYNMR-N	0000000000000	545	555	679.814	2	3.82384	5.56296e-05	21
AK100245	Os01g0842600	Similar to AAA-metalloprotease FtsH. (Os01t0842600-01)	88444.7	K-GALLVGPPGTGK-T	00000000000000	355	366	533.819	2	5.14406	0.0322706	2
AK100245	Os01g0842600	Similar to AAA-metalloprotease FtsH. (Os01t0842600-01)	88444.7	K-ISTGAQNDLEK-V	0000000000000	654	664	588.302	2	6.34538	0.031759	2
Os01g0843300	Os01g0843300	Similar to ATP/GTP/Ca++ binding protein. (Os01t0843300-00)	66741.4	K-LETTWTVLR-K	00000000000	270	278	559.816	2	4.22371	0.0170351	1
AK071303	Os01g0848700	Similar to Ras-related protein Rab11C. (Os01t0848700-01)	24049.2	M-AHRVDNEYDYLFK-I	100000000000000	2	14	856.411	2	4.33904	0.000792735	5
AK071303	Os01g0848700	Similar to Ras-related protein Rab11C. (Os01t0848700-01)	24049.2	K-IVLIGDSGVGK-S	0000000000000	15	25	529.32	2	6.4309	0.000168661	5
AK071303	Os01g0848700	Similar to Ras-related protein Rab11C. (Os01t0848700-01)	24049.2	K-STIGVEFATR-T	000000000000	43	52	540.792	2	6.76878	0.000614795	5
AK071303	Os01g0848700	Similar to Ras-related protein Rab11C. (Os01t0848700-01)	24049.2	K-AQIWDTAGQER-Y	0000000000000	63	73	637.813	2	5.14649	3.16714e-06	5
AK071303	Os01g0848700	Similar to Ras-related protein Rab11C. (Os01t0848700-01)	24049.2	R-GAVGALLVFDITKR-Q	0000000000000000	84	97	730.441	2	7.9938	0.00193586	5
AK103367	Os01g0851700	Similar to Cytosolic starch phosphorylase (Fragment). (Os01t0851700-01)	94979.6	R-QLLNILGAVYR-Y	0000000000000	580	590	630.378	2	1.06048	0.044566	1
005-008-A03	Os01g0860300	Similar to Ribosomal protein L1. (Os01t0860300-01)	10556.6	K-FPTLVTHQESLESK-V	0000000000000000	8	21	539.286	3	6.16185	0.0128337	1
AK120353	Os01g0862300	Similar to Sorting nexin 1. (Os01t0862300-01)	45888.7	K-TADIGFAFHEFAK-G	000000000000000	361	373	727.363	2	5.91314	0.0334602	1
J033124A14	Os01g0864700	Similar to Serine/threonine-protein kinase Nek5. (Os01t0864700-00)	49177.8	K-GMMNDEASRSSM--	00300000000030	438	449	674.243	2	-13.659	0.0377546	1
AK068991	Os01g0866100	Similar to Actin 4. (Os01t0866100-01)	23122.1	K-AGFAGDDAPR-A	000000000000	20	29	488.73	2	3.68097	0.00143172	4
AK068991	Os01g0866100	Similar to Actin 4. (Os01t0866100-01)	23122.1	R-AVFPSIVGRPR-H	0000000000000	30	40	599.86	2	6.40232	0.0176706	4
AK068991	Os01g0866100	Similar to Actin 4. (Os01t0866100-01)	23122.1	K-DAYVGDEAQSKR-G	00000000000000	52	63	669.823	2	7.32134	0.0286657	4
AK068786	Os01g0866300	Similar to VAMP-like protein YKT61 (AtYKT61) (Geranylgeranylated protein 1) (AtGP1). (Os01t0866300-01), VAMP-like protein YKT61 (AtYKT61) (Geranylgeranylated protein 1) (AtGP1). (Os01t0866300-02)	27647	K-FQDPAEADKLMK-I	00000000000000	183	194	696.85	2	7.81516	0.000696046	2
AK068786	Os01g0866300	Similar to VAMP-like protein YKT61 (AtYKT61) (Geranylgeranylated protein 1) (AtGP1). (Os01t0866300-01), VAMP-like protein YKT61 (AtYKT61) (Geranylgeranylated protein 1) (AtGP1). (Os01t0866300-02)	27647	K-SSDLSAASQMFYK-Q	000000000000000	227	239	717.837	2	6.61014	0.0307802	2
AK111757	Os01g0866500	Similar to Soluble inorganic pyrophosphatase (EC 3.6.1.1) (Pyrophosphate phospho- hydrolase) (PPase). (Os01t0866500-01)	24236.2	R-VLYSSVVYPHNYGFIPR-T	0000000000000000000	78	94	671.023	3	5.40021	0.00409399	2
J065047D24	Os01g0866600	Similar to bolA-like protein. (Os01t0866600-01)	9948.06	K-KALTPAQAQPQPEPAADKAPQA--	000000000000000000000000	73	94	743.398	3	6.04387	0.000909001	4
J065047D24	Os01g0866600	Similar to bolA-like protein. (Os01t0866600-01)	9948.06	K-ALTPAQAQPQPEPAADK-A	0000000000000000000	74	90	866.952	2	6.19008	1.95036e-05	4
J065047D24	Os01g0866600	Similar to bolA-like protein. (Os01t0866600-01)	9948.06	K-ALTPAQAQPQPEPAADKAPQA--	00000000000000000000000	74	94	1050.55	2	5.50714	0.00665975	4
AK099337	Os01g0866700	Similar to Sm-like protein. (Os01t0866700-01)	11669.2	M-AAAAAAAAAEEEIAVK-E	100000000000000000	2	17	749.895	2	4.89269	0.00242548	3
AK099337	Os01g0866700	Similar to Sm-like protein. (Os01t0866700-01)	11669.2	M-AAAAAAAAAEEEIAVKEPLDLIR-L	1000000000000000000000000	2	24	1168.14	2	7.84668	5.62957e-08	3
AK099337	Os01g0866700	Similar to Sm-like protein. (Os01t0866700-01)	11669.2	R-GDGVILVSPPLR-T	00000000000000	91	102	611.864	2	4.86873	0.00745692	3
AK069062	Os01g0867800	Nucleotide-binding, alpha-beta plait domain containing protein. (Os01t0867800-01), Similar to RBP50. (Os01t0867800-02), Similar to RBP50. (Os01t0867800-03)	49641	R-QSAIQAYGALHGR-N	200000000000000	147	159	677.85	2	4.22513	0.000314685	1
AK068840	Os01g0871500	TGF-beta receptor, type I/II extracellular region family protein. (Os01t0871500-01)	59592.4	M-ASHAVTDALLLPR-S	100000000000000	2	14	703.401	2	10.5466	0.00281487	1
AK121856	Os01g0874700	GOLD domain containing protein. (Os01t0874700-01), GOLD domain containing protein. (Os01t0874700-02), Similar to patellin-1. (Os01t0874700-03)	66630	K-KVEEETPAVEAEAKEEK-K	0000000000000000000	35	51	639.324	3	3.75814	0.00225585	4
AK121856	Os01g0874700	GOLD domain containing protein. (Os01t0874700-01), GOLD domain containing protein. (Os01t0874700-02), Similar to patellin-1. (Os01t0874700-03)	66630	K-TVVVTEEEAATK-T	00000000000000	219	230	638.838	2	5.00987	6.2966e-06	4
AK121856	Os01g0874700	GOLD domain containing protein. (Os01t0874700-01), GOLD domain containing protein. (Os01t0874700-02), Similar to patellin-1. (Os01t0874700-03)	66630	R-QAVALLQDNYPEFIAK-K	000000000000000000	422	437	910.49	2	7.13847	0.00386531	4
AK121856	Os01g0874700	GOLD domain containing protein. (Os01t0874700-01), GOLD domain containing protein. (Os01t0874700-02), Similar to patellin-1. (Os01t0874700-03)	66630	K-IVLTINNPASK-K	0000000000000	586	596	585.35	2	4.11634	0.0244348	4
Os01g0876900	Os01g0876900	Conserved hypothetical protein. (Os01t0876900-00)	20459.6	K-RVPEALVK-T	0000000000	76	83	456.291	2	7.21689	0.00165508	5
Os01g0876900	Os01g0876900	Conserved hypothetical protein. (Os01t0876900-00)	20459.6	K-ILNIHAPEWSGEVR-S	0000000000000000	103	116	540.958	3	6.52977	0.00949376	5
Os01g0876900	Os01g0876900	Conserved hypothetical protein. (Os01t0876900-00)	20459.6	R-EATGTSSADDTGYGDPVQK-A	000000000000000000000	145	163	949.926	2	10.4556	0.0357353	5
AK073884	Os01g0878400	Amino acid transporter, transmembrane domain containing protein. (Os01t0878400-01)	50467.1	R-NRTYMDAVR-S	00000300000	85	93	571.282	2	12.3512	0.0343588	1
AK106608	Os01g0888500	Similar to Phosphoribosylformylglycinamidine synthase (EC 6.3.5.3) (FGAM synthase) (FGAMS) (Formylglycinamide ribotide amidotransferase) (FGARAT) (Formylglycinamide ribotide synthetase). (Os01t0888500-01)	80934.8	R-LAVGEALTNLVWAK-V	0000000000000000	153	166	742.932	2	6.47704	0.013174	2
AK106608	Os01g0888500	Similar to Phosphoribosylformylglycinamidine synthase (EC 6.3.5.3) (FGAM synthase) (FGAMS) (Formylglycinamide ribotide amidotransferase) (FGARAT) (Formylglycinamide ribotide synthetase). (Os01t0888500-01)	80934.8	K-AFEAVQELLSQR-L	00000000000000	301	312	695.875	2	7.01563	1.72873e-05	2
AK058611	Os01g0895100	Similar to Membrane-associated 30 kDa protein, chloroplast precursor (M30). (Os01t0895100-01)	35138.2	R-QATAQVLASQK-R	0000000000000	102	112	572.823	2	5.61867	3.64038e-06	7
AK058611	Os01g0895100	Similar to Membrane-associated 30 kDa protein, chloroplast precursor (M30). (Os01t0895100-01)	35138.2	R-QATAQVLASQKR-L	20000000000000	102	113	642.36	2	4.44221	0.0161886	7
AK058611	Os01g0895100	Similar to Membrane-associated 30 kDa protein, chloroplast precursor (M30). (Os01t0895100-01)	35138.2	R-QATAQVLASQKR-L	00000000000000	102	113	650.875	2	8.10601	0.0370575	7
AK058611	Os01g0895100	Similar to Membrane-associated 30 kDa protein, chloroplast precursor (M30). (Os01t0895100-01)	35138.2	R-AQLALQKGDEDLAR-E	0000000000000000	132	145	764.416	2	8.17029	0.00149858	7
AK058611	Os01g0895100	Similar to Membrane-associated 30 kDa protein, chloroplast precursor (M30). (Os01t0895100-01)	35138.2	K-SYADNASSLK-A	000000000000	153	162	528.257	2	5.5986	0.00238824	7
AK058611	Os01g0895100	Similar to Membrane-associated 30 kDa protein, chloroplast precursor (M30). (Os01t0895100-01)	35138.2	K-GVVENLVSNTR-V	0000000000000	170	180	594.326	2	6.56878	2.09076e-05	7
AK058611	Os01g0895100	Similar to Membrane-associated 30 kDa protein, chloroplast precursor (M30). (Os01t0895100-01)	35138.2	K-VSEMLGNVNTSGALSAFEK-M	000030000000000000000	209	227	985.489	2	8.25225	0.000345936	7
J013127J15	Os01g0896620	#N/A	14910.9	R-LTNQDKNKYNTPK-Y	000000000000000	37	49	782.414	2	5.72011	0.0490158	1
AK104693	Os01g0896800	Ribosomal protein L5, eukaryotic domain containing protein. (Os01t0896800-01)	34778.8	R-LTNQDKNKYNTPK-Y	000000000000000	37	49	782.414	2	5.72011	0.0490158	7
AK104693	Os01g0896800	Ribosomal protein L5, eukaryotic domain containing protein. (Os01t0896800-01)	34778.8	R-ALLDVGLIR-T	00000000000	144	152	485.312	2	8.15558	0.000242107	7
AK104693	Os01g0896800	Ribosomal protein L5, eukaryotic domain containing protein. (Os01t0896800-01)	34778.8	K-GALDGGLDIPHSDKR-F	00000000000000000	165	179	775.903	2	4.02241	0.00543768	7
AK104693	Os01g0896800	Ribosomal protein L5, eukaryotic domain containing protein. (Os01t0896800-01)	34778.8	K-GIDADGMEALYK-K	00000000000000	230	241	641.806	2	5.19471	0.000468031	7
AK104693	Os01g0896800	Ribosomal protein L5, eukaryotic domain containing protein. (Os01t0896800-01)	34778.8	K-GIDADGMEALYKK-V	000000030000000	230	242	713.852	2	5.33304	0.0145452	7
J065205F10	Os01g0901500	Similar to 4-coumarate--CoA ligase-like 5. (Os01t0901500-01)	7419.85	K-IVDPSTGEALGPGQR-G	00000000000000000	44	58	748.892	2	4.69427	0.00104678	1
AK073770	Os01g0905800	Aldolase C-1. (Os01t0905800-01), Aldolase C-1. (Os01t0905800-02), Aldolase C-1. (Os01t0905800-03)	39225.4	K-YKDELIK-N	000000000	8	14	454.76	2	4.28578	0.0268419	32
AK073770	Os01g0905800	Aldolase C-1. (Os01t0905800-01), Aldolase C-1. (Os01t0905800-02), Aldolase C-1. (Os01t0905800-03)	39225.4	K-NAAYIGTPGK-G	000000000000	15	24	496.267	2	5.31972	0.000129626	32
AK073770	Os01g0905800	Aldolase C-1. (Os01t0905800-01), Aldolase C-1. (Os01t0905800-02), Aldolase C-1. (Os01t0905800-03)	39225.4	K-NAAYIGTPGKGILAADESTGTIGKR-F	000000000000000000000000000	15	39	821.112	3	6.87929	0.00949336	32
AK073770	Os01g0905800	Aldolase C-1. (Os01t0905800-01), Aldolase C-1. (Os01t0905800-02), Aldolase C-1. (Os01t0905800-03)	39225.4	K-GILAADESTGTIGK-R	0000000000000000	25	38	666.857	2	5.27474	7.65627e-07	32
AK073770	Os01g0905800	Aldolase C-1. (Os01t0905800-01), Aldolase C-1. (Os01t0905800-02), Aldolase C-1. (Os01t0905800-03)	39225.4	K-GILAADESTGTIGKR-F	00000000000000000	25	39	744.909	2	5.76648	1.94119e-07	32
AK073770	Os01g0905800	Aldolase C-1. (Os01t0905800-01), Aldolase C-1. (Os01t0905800-02), Aldolase C-1. (Os01t0905800-03)	39225.4	K-RFASINVENVEENRR-S	00000000000000000	39	53	611.653	3	5.05079	0.00112839	32
AK073770	Os01g0905800	Aldolase C-1. (Os01t0905800-01), Aldolase C-1. (Os01t0905800-02), Aldolase C-1. (Os01t0905800-03)	39225.4	R-FASINVENVEENR-R	000000000000000	40	52	760.875	2	5.77887	0.00548315	32
AK073770	Os01g0905800	Aldolase C-1. (Os01t0905800-01), Aldolase C-1. (Os01t0905800-02), Aldolase C-1. (Os01t0905800-03)	39225.4	R-FASINVENVEENRR-S	0000000000000000	40	53	838.925	2	4.85681	0.0227101	32
AK073770	Os01g0905800	Aldolase C-1. (Os01t0905800-01), Aldolase C-1. (Os01t0905800-02), Aldolase C-1. (Os01t0905800-03)	39225.4	K-TKDGKPFVDVLK-E	00000000000000	83	94	673.89	2	3.28615	0.000199695	32
AK073770	Os01g0905800	Aldolase C-1. (Os01t0905800-01), Aldolase C-1. (Os01t0905800-02), Aldolase C-1. (Os01t0905800-03)	39225.4	K-TKDGKPFVDVLKEGGVLPGIK-V	00000000000000000000000	83	103	733.096	3	6.20019	0.000200139	32
AK073770	Os01g0905800	Aldolase C-1. (Os01t0905800-01), Aldolase C-1. (Os01t0905800-02), Aldolase C-1. (Os01t0905800-03)	39225.4	K-DGKPFVDVLK-E	000000000000	85	94	559.321	2	8.26717	0.00489419	32
AK073770	Os01g0905800	Aldolase C-1. (Os01t0905800-01), Aldolase C-1. (Os01t0905800-02), Aldolase C-1. (Os01t0905800-03)	39225.4	K-DGKPFVDVLKEGGVLPGIK-V	000000000000000000000	85	103	984.569	2	7.6536	1.10007e-05	32
AK073770	Os01g0905800	Aldolase C-1. (Os01t0905800-01), Aldolase C-1. (Os01t0905800-02), Aldolase C-1. (Os01t0905800-03)	39225.4	K-VDKGTVEVAGTNK-E	000000000000000	104	116	659.358	2	5.81171	0.000296742	32
AK073770	Os01g0905800	Aldolase C-1. (Os01t0905800-01), Aldolase C-1. (Os01t0905800-02), Aldolase C-1. (Os01t0905800-03)	39225.4	K-VDKGTVEVAGTNKETTTQGHDDLGKR-C	0000000000000000000000000000	104	129	919.471	3	5.81639	6.11567e-05	32
AK073770	Os01g0905800	Aldolase C-1. (Os01t0905800-01), Aldolase C-1. (Os01t0905800-02), Aldolase C-1. (Os01t0905800-03)	39225.4	K-GTVEVAGTNK-E	000000000000	107	116	488.261	2	4.61536	0.00524729	32
AK073770	Os01g0905800	Aldolase C-1. (Os01t0905800-01), Aldolase C-1. (Os01t0905800-02), Aldolase C-1. (Os01t0905800-03)	39225.4	K-GTVEVAGTNKETTTQGHDDLGKR-C	0000000000000000000000000	107	129	805.406	3	5.75983	0.000692554	32
AK073770	Os01g0905800	Aldolase C-1. (Os01t0905800-01), Aldolase C-1. (Os01t0905800-02), Aldolase C-1. (Os01t0905800-03)	39225.4	K-ETTTQGHDDLGKR-C	000000000000000	117	129	729.356	2	4.77476	0.00220658	32
AK073770	Os01g0905800	Aldolase C-1. (Os01t0905800-01), Aldolase C-1. (Os01t0905800-02), Aldolase C-1. (Os01t0905800-03)	39225.4	K-IGPNEPSQLSIDLNAQGLAR-Y	0000000000000000000000	149	168	1047.06	2	4.97585	6.65324e-08	32
AK073770	Os01g0905800	Aldolase C-1. (Os01t0905800-01), Aldolase C-1. (Os01t0905800-02), Aldolase C-1. (Os01t0905800-03)	39225.4	K-KVSPQLIAEYTVR-A	000000000000000	237	249	752.436	2	7.96812	4.18073e-05	32
AK073770	Os01g0905800	Aldolase C-1. (Os01t0905800-01), Aldolase C-1. (Os01t0905800-02), Aldolase C-1. (Os01t0905800-03)	39225.4	K-VSPQLIAEYTVR-A	00000000000000	238	249	688.387	2	6.12011	0.000156906	32
AK073770	Os01g0905800	Aldolase C-1. (Os01t0905800-01), Aldolase C-1. (Os01t0905800-02), Aldolase C-1. (Os01t0905800-03)	39225.4	K-KPWALSFSFGR-A	0000000000000	288	298	648.352	2	5.06824	0.000857129	32
AK073770	Os01g0905800	Aldolase C-1. (Os01t0905800-01), Aldolase C-1. (Os01t0905800-02), Aldolase C-1. (Os01t0905800-03)	39225.4	K-AWGGKTENVVK-A	0000000000000	307	317	594.826	2	5.6319	1.87789e-05	32
AK101333	Os01g0911200	Ribophorin II family protein. (Os01t0911200-01)	75373	K-LASSSSSPAKDLFHAAR-I	0000000000000000000	89	105	582.307	3	4.3196	0.000245348	8
AK101333	Os01g0911200	Ribophorin II family protein. (Os01t0911200-01)	75373	K-HVDAAEYKGPITTSASVVR-G	000000000000000000000	243	261	667.691	3	9.92574	0.000652007	8
AK101333	Os01g0911200	Ribophorin II family protein. (Os01t0911200-01)	75373	K-GPITTSASVVR-G	0000000000000	251	261	544.315	2	11.2389	0.0355152	8
AK101333	Os01g0911200	Ribophorin II family protein. (Os01t0911200-01)	75373	R-GVTSFAAVASGK-L	00000000000000	262	273	547.799	2	5.55496	6.36293e-07	8
AK101333	Os01g0911200	Ribophorin II family protein. (Os01t0911200-01)	75373	R-VFVPLVLSLPSK-V	00000000000000	315	326	649.911	2	4.91144	0.00615905	8
AK101333	Os01g0911200	Ribophorin II family protein. (Os01t0911200-01)	75373	R-VNLVQVLGSDSK-V	00000000000000	353	364	629.857	2	5.20515	1.0123e-06	8
AK101333	Os01g0911200	Ribophorin II family protein. (Os01t0911200-01)	75373	K-IVLDFLGLVEK-F	0000000000000	515	525	623.381	2	7.3358	2.86128e-05	8
AK101333	Os01g0911200	Ribophorin II family protein. (Os01t0911200-01)	75373	K-APKPPAQAVDPFSK-F	0000000000000000	566	579	484.934	3	2.74951	0.0314349	8
AK070387	Os01g0913100	Protein of unknown function DUF538 family protein. (Os01t0913100-01)	17917.1	R-GLLPAGIADFR-H	0000000000000	45	55	565.325	2	6.04342	0.00134801	1
J100024O13	Os01g0915900	Conserved hypothetical protein. (Os01t0915900-01)	28327.9	M-SSWNSPYYDTSSYGAGSGGGGGGGR-R	000000000000000000000000000	2	26	1192.49	2	-7.4894	0.0215384	1
AK073832	Os01g0916200	Similar to predicted protein. (Os01t0916200-01), Armadillo-like helical domain containing protein. (Os01t0916200-02)	104576	K-MLDAAAETTSK-F	0000000000000	322	332	569.277	2	0.626233	0.00738534	2
AK073832	Os01g0916200	Similar to predicted protein. (Os01t0916200-01), Armadillo-like helical domain containing protein. (Os01t0916200-02)	104576	K-VATANATPQPAK-E	00000000000000	816	827	584.823	2	6.01635	0.0256772	2
AK071710	Os01g0916400	Similar to Selenium binding protein. (Os01t0916400-01)	53741.7	R-FLILPSLLSGR-V	0000000000000	101	111	608.382	2	8.07881	1.55621e-06	2
AK071710	Os01g0916400	Similar to Selenium binding protein. (Os01t0916400-01)	53741.7	K-QTLDLGSTGLLPLEVR-F	000000000000000000	248	263	856.49	2	8.14312	0.00037747	2
AK059446	Os01g0916600	RNA recognition motif, glycine rich protein domain containing protein. (Os01t0916600-01)	15537.3	K-LFVGGLSWNTNDDSLK-E	000000000000000000	39	54	883.445	2	3.51861	3.82998e-05	7
AK059446	Os01g0916600	RNA recognition motif, glycine rich protein domain containing protein. (Os01t0916600-01)	15537.3	K-EAFTSFGDVTEAR-V	000000000000000	55	67	715.337	2	5.17099	6.61648e-06	7
AK059446	Os01g0916600	RNA recognition motif, glycine rich protein domain containing protein. (Os01t0916600-01)	15537.3	R-SRGFGFVSFANGDDAK-S	000000000000000000	77	92	558.936	3	4.08633	0.0356923	7
AK059446	Os01g0916600	RNA recognition motif, glycine rich protein domain containing protein. (Os01t0916600-01)	15537.3	R-GFGFVSFANGDDAK-S	0000000000000000	79	92	716.336	2	7.86014	1.3925e-06	7
AK059446	Os01g0916600	RNA recognition motif, glycine rich protein domain containing protein. (Os01t0916600-01)	15537.3	K-SAMDAMDGKELEGR-S	0000003000000000	93	106	763.34	2	7.23924	0.0326129	7
AK059446	Os01g0916600	RNA recognition motif, glycine rich protein domain containing protein. (Os01t0916600-01)	15537.3	R-VNFANERPPGNR-G	00000000000000	110	121	457.571	3	4.74826	0.00958405	7
AK059446	Os01g0916600	RNA recognition motif, glycine rich protein domain containing protein. (Os01t0916600-01)	15537.3	R-GGGGYGGGGGGYGNQGGYGDGNR-G	0000000000000000000000000	122	144	995.911	2	6.11701	1.5e-08	7
AK062434	Os01g0918200	Similar to Ubiquitin-like protein SMT3. (Os01t0918200-01), Similar to Ubiquitin-like protein SMT3. (Os01t0918200-02)	11072.4	M-SSPAGEDEKKPAGGEGGGAHINLK-V	10000000000000000000000000	2	25	783.392	3	5.58724	0.0142379	6
AK062434	Os01g0918200	Similar to Ubiquitin-like protein SMT3. (Os01t0918200-01), Similar to Ubiquitin-like protein SMT3. (Os01t0918200-02)	11072.4	K-VKGQDGNEVFFR-I	00000000000000	26	37	698.356	2	2.91613	0.0350082	6
AK062434	Os01g0918200	Similar to Ubiquitin-like protein SMT3. (Os01t0918200-01), Similar to Ubiquitin-like protein SMT3. (Os01t0918200-02)	11072.4	K-GQDGNEVFFR-I	000000000000	28	37	584.777	2	7.07022	0.00902041	6
AK062434	Os01g0918200	Similar to Ubiquitin-like protein SMT3. (Os01t0918200-01), Similar to Ubiquitin-like protein SMT3. (Os01t0918200-02)	11072.4	K-SIAFLFDGR-R	00000000000	61	69	513.277	2	4.48881	0.00374891	6
AK058869	Os01g0918300	Ubiquitin-like protein SMT3. (Os01t0918300-01), Similar to Ubiquitin-like protein SMT3. (Os01t0918300-02)	11063.4	K-VKGQDGNEVFFR-I	00000000000000	25	36	698.356	2	2.91613	0.0350082	4
AK058869	Os01g0918300	Ubiquitin-like protein SMT3. (Os01t0918300-01), Similar to Ubiquitin-like protein SMT3. (Os01t0918300-02)	11063.4	K-GQDGNEVFFR-I	000000000000	27	36	584.777	2	7.07022	0.00902041	4
AK073965	Os01g0920400	Similar to Dynamin-related protein 3A (Dynamin-like protein 2) (Dynamin-like protein 2a). Splice isoform 2. (Os01t0920400-01), Hypothetical conserved gene. (Os01t0920400-02)	90545.8	K-SSVLEALVGR-D	000000000000	64	73	515.801	2	5.60294	0.000641876	4
AK073965	Os01g0920400	Similar to Dynamin-related protein 3A (Dynamin-like protein 2) (Dynamin-like protein 2a). Splice isoform 2. (Os01t0920400-01), Hypothetical conserved gene. (Os01t0920400-02)	90545.8	R-LGYVGVVNR-S	00000000000	256	264	488.785	2	4.53881	7.44478e-06	4
AK073965	Os01g0920400	Similar to Dynamin-related protein 3A (Dynamin-like protein 2) (Dynamin-like protein 2a). Splice isoform 2. (Os01t0920400-01), Hypothetical conserved gene. (Os01t0920400-02)	90545.8	R-ISSQLTTTAK-E	000000000000	327	336	525.298	2	4.37561	0.00926822	4
AK073965	Os01g0920400	Similar to Dynamin-related protein 3A (Dynamin-like protein 2) (Dynamin-like protein 2a). Splice isoform 2. (Os01t0920400-01), Hypothetical conserved gene. (Os01t0920400-02)	90545.8	R-GYSLDADATGLPR-A	000000000000000	762	774	668.335	2	6.80123	0.00191636	4
Os01g0921200	Os01g0921200	Similar to predicted protein. (Os01t0921200-01)	109820	R-AAAAAAAAAAAAAR-R	0000000000000000	30	43	549.808	2	6.11305	9.14505e-06	1
AK071344	Os01g0921600	Similar to Mitochondrial import receptor subunit TOM20 (Translocase of outer membrane 20 kDa subunit). (Os01t0921600-01)	22873.1	K-VTYEQNPHDADNLTR-W	00000000000000000	24	38	886.917	2	4.17006	1.19224e-05	4
AK071344	Os01g0921600	Similar to Mitochondrial import receptor subunit TOM20 (Translocase of outer membrane 20 kDa subunit). (Os01t0921600-01)	22873.1	R-WGGALLELSQMR-N	00000000000000	39	50	680.861	2	8.06625	0.000155348	4
AK071344	Os01g0921600	Similar to Mitochondrial import receptor subunit TOM20 (Translocase of outer membrane 20 kDa subunit). (Os01t0921600-01)	22873.1	K-AVDVEPANDLYR-K	00000000000000	114	125	681.343	2	6.30446	0.0112389	4
AK071344	Os01g0921600	Similar to Mitochondrial import receptor subunit TOM20 (Translocase of outer membrane 20 kDa subunit). (Os01t0921600-01)	22873.1	K-SNAPPQAPR--	00000000000	194	202	469.249	2	6.09591	0.000701894	4
AK073357	Os01g0925800	Similar to Ubiquitin conjugating enzyme. (Os01t0925800-01)	21522.8	R-DYSTFSATAR-Y	000000000000	134	143	559.767	2	14.0683	0.0400242	1
AK067632	Os01g0926300	Similar to Transaldolase (EC 2.2.1.2). (Os01t0926300-01), Similar to Transaldolase (EC 2.2.1.2). (Os01t0926300-02), Similar to Transaldolase (EC 2.2.1.2). (Os01t0926300-03)	46615.4	R-GVTSNPSIFQK-A	0000000000000	103	113	589.317	2	4.74787	3.65471e-05	8
AK067632	Os01g0926300	Similar to Transaldolase (EC 2.2.1.2). (Os01t0926300-01), Similar to Transaldolase (EC 2.2.1.2). (Os01t0926300-02), Similar to Transaldolase (EC 2.2.1.2). (Os01t0926300-03)	46615.4	K-AISTSNAYDDQFK-Q	000000000000000	114	126	730.341	2	3.93925	2.54988e-07	8
AK067632	Os01g0926300	Similar to Transaldolase (EC 2.2.1.2). (Os01t0926300-01), Similar to Transaldolase (EC 2.2.1.2). (Os01t0926300-02), Similar to Transaldolase (EC 2.2.1.2). (Os01t0926300-03)	46615.4	R-LANDTQGTVEAAK-W	000000000000000	176	188	659.337	2	1.76844	0.0430797	8
AK067632	Os01g0926300	Similar to Transaldolase (EC 2.2.1.2). (Os01t0926300-01), Similar to Transaldolase (EC 2.2.1.2). (Os01t0926300-02), Similar to Transaldolase (EC 2.2.1.2). (Os01t0926300-03)	46615.4	R-VTSVASFFVSR-V	0000000000000	256	266	600.33	2	8.31543	0.000296601	8
AK067632	Os01g0926300	Similar to Transaldolase (EC 2.2.1.2). (Os01t0926300-01), Similar to Transaldolase (EC 2.2.1.2). (Os01t0926300-02), Similar to Transaldolase (EC 2.2.1.2). (Os01t0926300-03)	46615.4	R-VDTLIDKMLEK-I	0000000000000	267	277	652.866	2	8.46192	0.00324929	8
AK067632	Os01g0926300	Similar to Transaldolase (EC 2.2.1.2). (Os01t0926300-01), Similar to Transaldolase (EC 2.2.1.2). (Os01t0926300-02), Similar to Transaldolase (EC 2.2.1.2). (Os01t0926300-03)	46615.4	R-LLWASTSVK-N	00000000000	324	332	502.795	2	5.03883	0.0429447	8
AK067632	Os01g0926300	Similar to Transaldolase (EC 2.2.1.2). (Os01t0926300-01), Similar to Transaldolase (EC 2.2.1.2). (Os01t0926300-02), Similar to Transaldolase (EC 2.2.1.2). (Os01t0926300-03)	46615.4	R-TIDANVSDAEGVYSALEK-L	00000000000000000000	371	388	941.463	2	5.7878	2.48894e-06	8
AK067632	Os01g0926300	Similar to Transaldolase (EC 2.2.1.2). (Os01t0926300-01), Similar to Transaldolase (EC 2.2.1.2). (Os01t0926300-02), Similar to Transaldolase (EC 2.2.1.2). (Os01t0926300-03)	46615.4	K-AFDSLLGSLEEK-G	00000000000000	411	422	654.841	2	5.0203	8.36758e-05	8
AK073189	Os01g0927900	Similar to Aspartate kinase precursor (EC 2.7.2.4). (Os01t0927900-01)	61640.6	R-GGSDLTATTIGK-A	00000000000000	302	313	560.799	2	6.26695	0.0200182	2
AK073189	Os01g0927900	Similar to Aspartate kinase precursor (EC 2.7.2.4). (Os01t0927900-01)	61640.6	R-AIISLIGNVR-R	000000000000	492	501	528.333	2	2.20599	0.036903	2
AK069403	Os01g0935700	Similar to Cytochrome c1, heme protein. (Os01t0935700-01), Similar to Cytochrome c1 (Fragment). (Os01t0935700-02)	33389.7	R-DLVGVAYTEEETK-A	000000000000000	113	125	727.362	2	7.76298	0.000550065	3
AK069403	Os01g0935700	Similar to Cytochrome c1, heme protein. (Os01t0935700-01), Similar to Cytochrome c1 (Fragment). (Os01t0935700-02)	33389.7	K-LSDRFPQPYANEQAAR-F	000000000000000000	150	165	621.646	3	4.97496	0.000983562	3
AK069403	Os01g0935700	Similar to Cytochrome c1, heme protein. (Os01t0935700-01), Similar to Cytochrome c1 (Fragment). (Os01t0935700-02)	33389.7	R-EGLHYNPYFPGGAIAMPK-M	00000000000000003000	208	225	659.993	3	5.52632	0.0075299	3
AK069146	Os01g0935900	Conserved hypothetical protein. (Os01t0935900-01), Similar to Succinate dehydrogenase subunit 4. (Os01t0935900-02)	23115.4	R-KGPLTSESWK-V	000000000000	120	129	566.807	2	6.75803	0.0053756	2
AK069146	Os01g0935900	Conserved hypothetical protein. (Os01t0935900-01), Similar to Succinate dehydrogenase subunit 4. (Os01t0935900-02)	23115.4	K-VKQTELLTR-S	00000000000	130	138	544.331	2	7.78386	0.0019328	2
AK101971	Os01g0938900	Similar to Nascent polypeptide-associated complex alpha subunit-like protein 3 (NAC-alpha-like protein 3) (Alpha-NAC-like protein 3). (Os01t0938900-01), Similar to Nascent polypeptide-associated complex alpha subunit-like protein 3 (NAC-alpha-like protein 3) (Alpha-NAC-like protein 3). (Os01t0938900-02)	22078.9	K-SKNILFVISKPDVFK-S	00000000000000000	90	104	868.017	2	6.77867	4.9496e-05	11
AK101971	Os01g0938900	Similar to Nascent polypeptide-associated complex alpha subunit-like protein 3 (NAC-alpha-like protein 3) (Alpha-NAC-like protein 3). (Os01t0938900-01), Similar to Nascent polypeptide-associated complex alpha subunit-like protein 3 (NAC-alpha-like protein 3) (Alpha-NAC-like protein 3). (Os01t0938900-02)	22078.9	K-NILFVISKPDVFK-S	000000000000000	92	104	760.452	2	5.42506	3.47722e-08	11
AK101971	Os01g0938900	Similar to Nascent polypeptide-associated complex alpha subunit-like protein 3 (NAC-alpha-like protein 3) (Alpha-NAC-like protein 3). (Os01t0938900-01), Similar to Nascent polypeptide-associated complex alpha subunit-like protein 3 (NAC-alpha-like protein 3) (Alpha-NAC-like protein 3). (Os01t0938900-02)	22078.9	K-SPNSDTYVIFGEAK-I	0000000000000000	105	118	764.374	2	4.74048	7.67099e-08	11
AK101971	Os01g0938900	Similar to Nascent polypeptide-associated complex alpha subunit-like protein 3 (NAC-alpha-like protein 3) (Alpha-NAC-like protein 3). (Os01t0938900-01), Similar to Nascent polypeptide-associated complex alpha subunit-like protein 3 (NAC-alpha-like protein 3) (Alpha-NAC-like protein 3). (Os01t0938900-02)	22078.9	K-IEDLSSQLQTQAAEQFK-A	0000000000000000000	119	135	968.491	2	4.64485	9.75987e-08	11
AK101971	Os01g0938900	Similar to Nascent polypeptide-associated complex alpha subunit-like protein 3 (NAC-alpha-like protein 3) (Alpha-NAC-like protein 3). (Os01t0938900-01), Similar to Nascent polypeptide-associated complex alpha subunit-like protein 3 (NAC-alpha-like protein 3) (Alpha-NAC-like protein 3). (Os01t0938900-02)	22078.9	K-IEDLSSQLQTQAAEQFKAPDLSNVISK-A	00000000000000000000000000000	119	145	987.519	3	7.25151	5.91936e-05	11
AK101971	Os01g0938900	Similar to Nascent polypeptide-associated complex alpha subunit-like protein 3 (NAC-alpha-like protein 3) (Alpha-NAC-like protein 3). (Os01t0938900-01), Similar to Nascent polypeptide-associated complex alpha subunit-like protein 3 (NAC-alpha-like protein 3) (Alpha-NAC-like protein 3). (Os01t0938900-02)	22078.9	K-APDLSNVISK-A	000000000000	136	145	522.293	2	6.23309	0.00126494	11
AK101971	Os01g0938900	Similar to Nascent polypeptide-associated complex alpha subunit-like protein 3 (NAC-alpha-like protein 3) (Alpha-NAC-like protein 3). (Os01t0938900-01), Similar to Nascent polypeptide-associated complex alpha subunit-like protein 3 (NAC-alpha-like protein 3) (Alpha-NAC-like protein 3). (Os01t0938900-02)	22078.9	K-AEPSAAAQDDEEVDESGVEPK-D	00000000000000000000000	146	166	1086.98	2	5.26413	7.02187e-07	11
AK101971	Os01g0938900	Similar to Nascent polypeptide-associated complex alpha subunit-like protein 3 (NAC-alpha-like protein 3) (Alpha-NAC-like protein 3). (Os01t0938900-01), Similar to Nascent polypeptide-associated complex alpha subunit-like protein 3 (NAC-alpha-like protein 3) (Alpha-NAC-like protein 3). (Os01t0938900-02)	22078.9	K-DIELVMTQATVSR-S	000000000000000	167	179	731.889	2	8.84219	5.22821e-07	11
AK101971	Os01g0938900	Similar to Nascent polypeptide-associated complex alpha subunit-like protein 3 (NAC-alpha-like protein 3) (Alpha-NAC-like protein 3). (Os01t0938900-01), Similar to Nascent polypeptide-associated complex alpha subunit-like protein 3 (NAC-alpha-like protein 3) (Alpha-NAC-like protein 3). (Os01t0938900-02)	22078.9	K-DIELVMTQATVSR-S	000000300000000	167	179	739.882	2	3.59787	0.000338741	11
Os01g0939500	Os01g0939500	Similar to Eukaryotic peptide chain release factor subunit 1-2 (eRF1-2) (Eukaryotic release factor 1-2) (Omnipotent suppressor protein 1 homolog 2) (SUP1 homolog 2). (Os01t0939500-00)	49181	K-TELSQSDMFDQR-L	00000000000000	235	246	728.828	2	8.44026	0.000198001	3
Os01g0939500	Os01g0939500	Similar to Eukaryotic peptide chain release factor subunit 1-2 (eRF1-2) (Eukaryotic release factor 1-2) (Omnipotent suppressor protein 1 homolog 2) (SUP1 homolog 2). (Os01t0939500-00)	49181	K-YFEEISQDTGK-Y	0000000000000	291	301	658.807	2	5.21169	0.0421516	3
Os01g0939500	Os01g0939500	Similar to Eukaryotic peptide chain release factor subunit 1-2 (eRF1-2) (Eukaryotic release factor 1-2) (Omnipotent suppressor protein 1 homolog 2) (SUP1 homolog 2). (Os01t0939500-00)	49181	R-GFGGIGGILR-Y	000000000000	406	415	473.78	2	6.79218	0.000169339	3
AK070588	Os01g0939700	Similar to Esterase D (EC 3.1.1.1). (Os01t0939700-01), Similar to esterase D. (Os01t0939700-02)	32587.2	R-AAAAHGIALVAPDTSPR-G	0000000000000000000	80	96	809.444	2	6.44516	0.000141966	1
AK107602	Os01g0940100	Similar to Hexokinase. (Os01t0940100-01), Similar to Hexokinase-3. (Os01t0940100-02)	39087.1	R-LAAAGIVGILK-K	0000000000000	259	269	513.344	2	8.63359	0.00166782	1
AK059510	Os01g0943800	Similar to cDNA, clone: J100054L12, full insert sequence. (Os01t0943800-00)	59885.8	K-LVESAVLLLAAR-K	00000000000000	280	291	627.895	2	4.40917	6.14424e-05	1
AK069565	Os01g0951200	Similar to Orotidine 5'-phosphate decarboxylase (EC 4.1.1.23) (OMP decarboxylase) (OMPDCase) (OMPdecase) (Uridine 5'-monophosphate synthase) (UMP synthase). (Os01t0951200-01)	51056	K-VTVPGAAGAVKPK-A	000000000000000	203	215	597.867	2	4.51355	0.0145459	2
AK069565	Os01g0951200	Similar to Orotidine 5'-phosphate decarboxylase (EC 4.1.1.23) (OMP decarboxylase) (OMPDCase) (OMPdecase) (Uridine 5'-monophosphate synthase) (UMP synthase). (Os01t0951200-01)	51056	R-GSDIIIVGR-G	00000000000	441	449	465.276	2	4.24264	1.9778e-06	2
AK069239	Os01g0951800	Tetratricopeptide repeat 11 Fission 1 protein domain containing protein. (Os01t0951800-01)	17575.3	R-EVAEAATEEHKNVSIMR-L	0000000000000000300	36	52	643.986	3	4.66108	0.0432029	3
AK069239	Os01g0951800	Tetratricopeptide repeat 11 Fission 1 protein domain containing protein. (Os01t0951800-01)	17575.3	R-EKLYLLAVGHYR-N	00000000000000	88	99	487.949	3	7.54314	0.0249404	3
AK070047	Os01g0952600	Similar to LacZ (Fragment). (Os01t0952600-01), Similar to glycoside hydrolase family 2 protein. (Os01t0952600-02)	127794	M-AVASASALFSAK-N	10000000000000	2	13	582.82	2	5.0453	1.55357e-08	1
AK073433	Os01g0957200	Conserved hypothetical protein. (Os01t0957200-01)	42317.2	R-LLADDLFLAK-L	000000000000	162	171	559.83	2	6.75026	0.00162773	2
AK073433	Os01g0957200	Conserved hypothetical protein. (Os01t0957200-01)	42317.2	R-YQILAGVIEQR-M	0000000000000	331	341	645.367	2	4.19529	2.06786e-05	2
AK059165	Os01g0962400	Ubiquitin-like, Ufm1 domain containing protein. (Os01t0962400-01)	10355.5	K-VFSVPEAAPFTAVLK-F	00000000000000000	33	47	788.446	2	4.16896	0.00396157	1
AK073846	Os01g0962600	Similar to 40S ribosomal protein S10-1. (Os01t0962600-01)	19969.1	K-VDVPNLEVIK-L	000000000000	35	44	563.332	2	5.54646	0.00473447	4
AK073846	Os01g0962600	Similar to 40S ribosomal protein S10-1. (Os01t0962600-01)	19969.1	R-GPPRFEGDRPR-F	0000000000000	113	123	642.338	2	6.93326	0.00432366	4
AK073846	Os01g0962600	Similar to 40S ribosomal protein S10-1. (Os01t0962600-01)	19969.1	R-GAPGDFGGEKGGAPAEFQPSFR-G	000000000000000000000000	136	157	1090.02	2	6.60629	0.000295317	4
AK073846	Os01g0962600	Similar to 40S ribosomal protein S10-1. (Os01t0962600-01)	19969.1	K-GGAPAEFQPSFR-G	00000000000000	146	157	632.314	2	7.00839	0.0208167	4
AK073599	Os01g0964000	Similar to VAMP-like protein YKT61 (AtYKT61) (Geranylgeranylated protein 1) (AtGP1). (Os01t0964000-01)	24249.2	--MKITALLVLK-S	000000000000	1	10	565.377	2	7.16337	0.00297167	2
AK073599	Os01g0964000	Similar to VAMP-like protein YKT61 (AtYKT61) (Geranylgeranylated protein 1) (AtGP1). (Os01t0964000-01)	24249.2	K-SSDLSAASQMFYK-Q	000000000000000	190	202	717.837	2	6.61014	0.0307802	2
013-066-F12	Os01g0964400	#N/A	24730.4	K-AGFAGDDAPR-A	000000000000	21	30	488.73	2	3.68097	0.00143172	9
013-066-F12	Os01g0964400	#N/A	24730.4	R-AVFPSIVGRPR-H	0000000000000	31	41	599.86	2	6.40232	0.0176706	9
013-066-F12	Os01g0964400	#N/A	24730.4	K-DAYVGDEAQSKR-G	00000000000000	53	64	669.823	2	7.32134	0.0286657	9
013-066-F12	Os01g0964400	#N/A	24730.4	R-VAPEEHPVLLTEAPLNPK-A	00000000000000000000	98	115	977.537	2	0.813269	0.00849713	9
013-066-F12	Os01g0964400	#N/A	24730.4	K-EITALAPSSMK-I	0000000000300	163	173	582.308	2	8.87933	0.0165185	9
013-066-F12	Os01g0964400	#N/A	24730.4	K-EITALAPSSMK-I	0000000000000	163	173	574.308	2	5.10179	0.0165752	9
013-066-F12	Os01g0964400	#N/A	24730.4	K-IKVVAPPER-K	00000000000	174	182	504.816	2	4.55711	0.0151411	9
013-066-F12	Os01g0964400	#N/A	24730.4	K-IKVVAPPERK-Y	000000000000	174	183	568.865	2	7.54572	0.00743788	9
AK073175	Os01g0966300	Similar to Mitochondrial processing peptidase. (Os01t0966300-01)	54215.6	R-VIVAEDIGR-Q	00000000000	423	431	486.283	2	5.99343	0.0245764	1
AK058521	Os01g0967900	Similar to predicted protein. (Os01t0967900-01), Similar to Aspartyl aminopeptidase. (Os01t0967900-02)	58703.4	R-VPTLAIHLDR-T	000000000000	210	219	567.84	2	9.28342	0.0269132	1
AK070623	Os01g0969100	NAD(P)-binding domain containing protein. (Os01t0969100-01)	44943.7	R-MDFIPGVDGPSEGVPR-V	000000000000000000	228	243	836.91	2	7.74814	0.0163038	2
AK070623	Os01g0969100	NAD(P)-binding domain containing protein. (Os01t0969100-01)	44943.7	R-ANGQIFNVGNPNNEVTVR-Q	00000000000000000000	290	307	971.996	2	6.08284	0.0324449	2
AK069207	Os01g0970400	Eukaryotic translation initiation factor 4E-1 (eIF4E-1) (eIF-4E-1) (mRNA cap-binding protein) (eIF-4F 25 kDa subunit) (eIF-4F p26 subunit). (Os01t0970400-01)	25733.5	K-NAANEAAQISIGK-Q	000000000000000	182	194	643.845	2	9.37027	1.30966e-06	1
AK101688	Os01g0970900	Pentatricopeptide repeat domain containing protein. (Os01t0970900-01), Pentatricopeptide repeat domain containing protein. (Os01t0970900-02)	64423.7	R-IALGPSPDLELVYR-V	0000000000000000	287	300	771.933	2	4.57682	0.000151513	1
J065170O14	Os01g0974700	0	9228.53	R-VLYSSVVYPHNYGFIPR-T	0000000000000000000	30	46	671.023	3	5.40021	0.00409399	2
AK061022	Os01g0976200	11-S plant seed storage protein family protein. (Os01t0976200-01)	40664.6	K-EVGLGADLVR-I	000000000000	238	247	514.795	2	8.35284	7.34565e-07	2
AK072971	Os01g0976600	Similar to Methlytransferase, UbiE/COQ5 family. (Os01t0976600-01)	32944.8	K-HLDVAGGTGDVAFR-A	0000000000000000	93	106	707.862	2	6.85444	7.89582e-06	1
AK065652	Os01g0978100	Similar to Cysteine synthase, mitochondrial precursor (EC 2.5.1.47) (O- acetylserine sulfhydrylase) (O-acetylserine (Thiol)-lyase) (CSase C) (CS-C) (OAS-TL C) (AtCS-C). (Os01t0978100-01)	42187.9	R-IGYSMISDAEEK-G	00000000000000	121	132	671.821	2	11.6028	0.0293861	6
AK065652	Os01g0978100	Similar to Cysteine synthase, mitochondrial precursor (EC 2.5.1.47) (O- acetylserine sulfhydrylase) (O-acetylserine (Thiol)-lyase) (CSase C) (CS-C) (OAS-TL C) (AtCS-C). (Os01t0978100-01)	42187.9	K-AFGAELVLTDAAK-G	000000000000000	183	195	653.362	2	8.40805	7.22794e-07	6
AK065652	Os01g0978100	Similar to Cysteine synthase, mitochondrial precursor (EC 2.5.1.47) (O- acetylserine sulfhydrylase) (O-acetylserine (Thiol)-lyase) (CSase C) (CS-C) (OAS-TL C) (AtCS-C). (Os01t0978100-01)	42187.9	K-GAVDKATEILNK-T	00000000000000	199	210	629.857	2	5.62588	0.0151464	6
AK065652	Os01g0978100	Similar to Cysteine synthase, mitochondrial precursor (EC 2.5.1.47) (O- acetylserine sulfhydrylase) (O-acetylserine (Thiol)-lyase) (CSase C) (CS-C) (OAS-TL C) (AtCS-C). (Os01t0978100-01)	42187.9	K-VDVFIGGIGTGGTISGAGR-F	000000000000000000000	245	263	867.469	2	7.1847	0.0231452	6
AK065652	Os01g0978100	Similar to Cysteine synthase, mitochondrial precursor (EC 2.5.1.47) (O- acetylserine sulfhydrylase) (O-acetylserine (Thiol)-lyase) (CSase C) (CS-C) (OAS-TL C) (AtCS-C). (Os01t0978100-01)	42187.9	K-IQGIGAGFVPR-N	0000000000000	295	305	557.826	2	6.45542	3.95619e-05	6
AK065652	Os01g0978100	Similar to Cysteine synthase, mitochondrial precursor (EC 2.5.1.47) (O- acetylserine sulfhydrylase) (O-acetylserine (Thiol)-lyase) (CSase C) (CS-C) (OAS-TL C) (AtCS-C). (Os01t0978100-01)	42187.9	K-LVVVVFPSFGER-Y	00000000000000	362	373	674.889	2	6.33586	0.00521636	6
AK071514	Os02g0100100	Thioredoxin domain domain containing protein. (Os02t0100100-01)	62498.6	K-VDATEDTDLAQK-Y	00000000000000	131	142	653.316	2	6.16776	0.0004219	1
AK071514	Os02g0100100	Thioredoxin domain domain containing protein. (Os02t0100100-01)	62498.6	R-GIDSLVIAK-M	00000000000	463	471	458.283	2	8.59403	0.0131669	1
AK102264	Os02g0100300	Similar to HSP associated protein like. (Os02t0100300-01)	44194.4	K-MGDPSIDVTEENR-D	000000000000000	113	125	731.832	2	6.69825	3.89429e-06	5
AK102264	Os02g0100300	Similar to HSP associated protein like. (Os02t0100300-01)	44194.4	K-AILLNPLSAIMYGTR-A	00000000000300000	154	168	824.966	2	9.87252	5.13825e-05	5
AK102264	Os02g0100300	Similar to HSP associated protein like. (Os02t0100300-01)	44194.4	K-AILLNPLSAIMYGTR-A	00000000000000000	154	168	816.967	2	7.38586	0.00634919	5
AK102264	Os02g0100300	Similar to HSP associated protein like. (Os02t0100300-01)	44194.4	R-DANAALEINPDSAK-G	0000000000000000	184	197	714.856	2	5.11572	2.64702e-06	5
AK105706	Os02g0101700	Similar to HECT ubiquitin-protein ligase 3 (KAKTUS protein). (Os02t0101700-01), Similar to predicted protein. (Os02t0101700-02)	80256.9	R-LPPGGLAALNPK-L	00000000000000	637	648	574.349	2	7.27519	0.0487926	1
AK061193	Os02g0102700	Similar to AGL157Cp. (Os02t0102700-01)	14413.6	K-VSQLEHVFIR-G	000000000000	57	66	614.35	2	6.81452	0.0431037	1
AK070603	Os02g0102900	Similar to RuBisCO subunit binding-protein beta subunit, chloroplast (60 kDa chaperonin beta subunit) (CPN-60 beta) (Fragment). (Os02t0102900-01)	64255.9	K-LADLVGVTLGPK-G	00000000000000	75	86	591.861	2	3.82438	2.44345e-08	7
AK070603	Os02g0102900	Similar to RuBisCO subunit binding-protein beta subunit, chloroplast (60 kDa chaperonin beta subunit) (CPN-60 beta) (Fragment). (Os02t0102900-01)	64255.9	R-NVVLESKYGSPK-I	00000000000000	89	100	660.852	2	-13.7761	2.06079e-05	7
AK070603	Os02g0102900	Similar to RuBisCO subunit binding-protein beta subunit, chloroplast (60 kDa chaperonin beta subunit) (CPN-60 beta) (Fragment). (Os02t0102900-01)	64255.9	K-EVELEDPVENIGAK-L	0000000000000000	111	124	771.392	2	4.76347	0.000140417	7
AK070603	Os02g0102900	Similar to RuBisCO subunit binding-protein beta subunit, chloroplast (60 kDa chaperonin beta subunit) (CPN-60 beta) (Fragment). (Os02t0102900-01)	64255.9	K-VVAAGANPVQITR-G	000000000000000	158	170	648.379	2	5.42507	6.24286e-08	7
AK070603	Os02g0102900	Similar to RuBisCO subunit binding-protein beta subunit, chloroplast (60 kDa chaperonin beta subunit) (CPN-60 beta) (Fragment). (Os02t0102900-01)	64255.9	K-IAAIKAPGFGER-K	00000000000000	324	335	615.358	2	6.9943	0.026011	7
AK070603	Os02g0102900	Similar to RuBisCO subunit binding-protein beta subunit, chloroplast (60 kDa chaperonin beta subunit) (CPN-60 beta) (Fragment). (Os02t0102900-01)	64255.9	K-LRVEDALNATK-A	0000000000000	445	455	615.35	2	6.50605	0.00573342	7
AK070603	Os02g0102900	Similar to RuBisCO subunit binding-protein beta subunit, chloroplast (60 kDa chaperonin beta subunit) (CPN-60 beta) (Fragment). (Os02t0102900-01)	64255.9	K-NAGVNGSVVTEK-V	00000000000000	510	521	587.81	2	5.81735	0.000123674	7
AK102186	Os02g0103700	Similar to 60S ribosomal protein L9 (Gibberellin-regulated protein GA). (Os02t0103700-01), Similar to 60S ribosomal protein L9 (Gibberellin-regulated protein GA). (Os02t0103700-02)	21700.6	R-KLQVDAWFGTR-R	0000000000000	55	65	660.859	2	3.48335	7.64687e-05	15
AK102186	Os02g0103700	Similar to 60S ribosomal protein L9 (Gibberellin-regulated protein GA). (Os02t0103700-01), Similar to 60S ribosomal protein L9 (Gibberellin-regulated protein GA). (Os02t0103700-02)	21700.6	R-TAISHVQNLITGVTK-G	00000000000000000	73	87	791.455	2	4.79939	1.29495e-08	15
AK102186	Os02g0103700	Similar to 60S ribosomal protein L9 (Gibberellin-regulated protein GA). (Os02t0103700-01), Similar to 60S ribosomal protein L9 (Gibberellin-regulated protein GA). (Os02t0103700-02)	21700.6	R-FVYAHFPINASITNSNTAIEIR-N	000000000000000000000000	95	116	826.771	3	7.97601	0.00836816	15
AK102186	Os02g0103700	Similar to 60S ribosomal protein L9 (Gibberellin-regulated protein GA). (Os02t0103700-01), Similar to 60S ribosomal protein L9 (Gibberellin-regulated protein GA). (Os02t0103700-02)	21700.6	R-KVDMLEGVTILR-S	00000000000000	126	137	687.398	2	4.6676	1.09237e-06	15
AK102186	Os02g0103700	Similar to 60S ribosomal protein L9 (Gibberellin-regulated protein GA). (Os02t0103700-01), Similar to 60S ribosomal protein L9 (Gibberellin-regulated protein GA). (Os02t0103700-02)	21700.6	R-KVDMLEGVTILR-S	00003000000000	126	137	695.397	2	7.21746	4.12787e-05	15
AK102186	Os02g0103700	Similar to 60S ribosomal protein L9 (Gibberellin-regulated protein GA). (Os02t0103700-01), Similar to 60S ribosomal protein L9 (Gibberellin-regulated protein GA). (Os02t0103700-02)	21700.6	R-KVDMLEGVTILRSEK-V	00000000000000000	126	140	573.325	3	5.33729	0.0440665	15
AK102186	Os02g0103700	Similar to 60S ribosomal protein L9 (Gibberellin-regulated protein GA). (Os02t0103700-01), Similar to 60S ribosomal protein L9 (Gibberellin-regulated protein GA). (Os02t0103700-02)	21700.6	K-VDMLEGVTILR-S	0000000000000	127	137	623.35	2	4.55041	7.01565e-07	15
AK102186	Os02g0103700	Similar to 60S ribosomal protein L9 (Gibberellin-regulated protein GA). (Os02t0103700-01), Similar to 60S ribosomal protein L9 (Gibberellin-regulated protein GA). (Os02t0103700-02)	21700.6	K-VDMLEGVTILR-S	0003000000000	127	137	631.348	2	5.99827	9.74692e-05	15
AK102186	Os02g0103700	Similar to 60S ribosomal protein L9 (Gibberellin-regulated protein GA). (Os02t0103700-01), Similar to 60S ribosomal protein L9 (Gibberellin-regulated protein GA). (Os02t0103700-02)	21700.6	R-SEKVKDELVLDGNDIELVSR-S	0000000000000000000000	138	157	753.405	3	6.12862	6.10233e-06	15
AK102186	Os02g0103700	Similar to 60S ribosomal protein L9 (Gibberellin-regulated protein GA). (Os02t0103700-01), Similar to 60S ribosomal protein L9 (Gibberellin-regulated protein GA). (Os02t0103700-02)	21700.6	K-VKDELVLDGNDIELVSR-S	0000000000000000000	141	157	957.518	2	6.07247	1.66244e-06	15
AK070860	Os02g0104800	Uncharacterised conserved protein UCP022280 domain containing protein. (Os02t0104800-01)	29595.4	K-ETLLSGIQAGVNHMR-Q	00000000000000300	163	177	821.426	2	4.15071	0.0133635	2
AK070860	Os02g0104800	Uncharacterised conserved protein UCP022280 domain containing protein. (Os02t0104800-01)	29595.4	R-AIQSELNQISDIEK-Q	0000000000000000	214	227	794.417	2	2.55722	2.66326e-07	2
AK063525	Os02g0105200	Similar to Dihydrolipoamide S-acetyltransferase (EC 2.3.1.12). (Os02t0105200-01)	59600.6	K-VKETEPSRTPEPK-A	000000000000000	235	247	499.938	3	4.81727	0.0184864	9
AK063525	Os02g0105200	Similar to Dihydrolipoamide S-acetyltransferase (EC 2.3.1.12). (Os02t0105200-01)	59600.6	K-APKTEEASQPGGR-I	000000000000000	248	260	664.338	2	6.92193	0.0199023	9
AK063525	Os02g0105200	Similar to Dihydrolipoamide S-acetyltransferase (EC 2.3.1.12). (Os02t0105200-01)	59600.6	R-ILKADIEDYLASVAK-G	00000000000000000	290	304	824.967	2	7.18392	1.37058e-07	9
AK063525	Os02g0105200	Similar to Dihydrolipoamide S-acetyltransferase (EC 2.3.1.12). (Os02t0105200-01)	59600.6	R-EALAAPGLSYTDVPNTQIR-K	000000000000000000000	309	327	1008.53	2	5.19519	0.000676189	9
AK063525	Os02g0105200	Similar to Dihydrolipoamide S-acetyltransferase (EC 2.3.1.12). (Os02t0105200-01)	59600.6	K-QTIPHYYLTVDAR-V	000000000000000	339	351	788.914	2	5.6489	0.0440757	9
AK063525	Os02g0105200	Similar to Dihydrolipoamide S-acetyltransferase (EC 2.3.1.12). (Os02t0105200-01)	59600.6	K-LRGELNPLQESSGGK-K	00000000000000000	358	372	792.927	2	7.88345	2.65743e-05	9
AK063525	Os02g0105200	Similar to Dihydrolipoamide S-acetyltransferase (EC 2.3.1.12). (Os02t0105200-01)	59600.6	R-GELNPLQESSGGK-K	000000000000000	360	372	658.329	2	1.05343	0.000249162	9
AK063525	Os02g0105200	Similar to Dihydrolipoamide S-acetyltransferase (EC 2.3.1.12). (Os02t0105200-01)	59600.6	R-GELNPLQESSGGKK-I	0000000000000000	360	373	722.379	2	5.10258	0.015935	9
AK063525	Os02g0105200	Similar to Dihydrolipoamide S-acetyltransferase (EC 2.3.1.12). (Os02t0105200-01)	59600.6	K-KISINDLVIK-A	000000000000	373	382	571.864	2	4.89365	3.85121e-05	9
AK102423	Os02g0105900	Similar to 40S ribosomal protein S4. (Os02t0105900-01), Similar to 40S ribosomal protein S4. (Os02t0105900-02), Similar to 40S ribosomal protein S4. (Os02t0105900-03)	29988.3	R-EVISILMQR-H	00000000000	60	68	544.812	2	2.79546	0.0455436	5
AK102423	Os02g0105900	Similar to 40S ribosomal protein S4. (Os02t0105900-01), Similar to 40S ribosomal protein S4. (Os02t0105900-02), Similar to 40S ribosomal protein S4. (Os02t0105900-03)	29988.3	K-GIPYLNTYDGR-T	0000000000000	135	145	634.82	2	4.45638	0.0102028	5
AK102423	Os02g0105900	Similar to 40S ribosomal protein S4. (Os02t0105900-01), Similar to 40S ribosomal protein S4. (Os02t0105900-02), Similar to 40S ribosomal protein S4. (Os02t0105900-03)	29988.3	K-FDVGNVVMVTGGR-N	000000000000000	175	187	675.849	2	5.90368	1.71068e-05	5
AK102423	Os02g0105900	Similar to 40S ribosomal protein S4. (Os02t0105900-01), Similar to 40S ribosomal protein S4. (Os02t0105900-02), Similar to 40S ribosomal protein S4. (Os02t0105900-03)	29988.3	R-LGNVFTIGK-G	00000000000	222	230	474.782	2	6.07226	0.00012282	5
AK102423	Os02g0105900	Similar to 40S ribosomal protein S4. (Os02t0105900-01), Similar to 40S ribosomal protein S4. (Os02t0105900-02), Similar to 40S ribosomal protein S4. (Os02t0105900-03)	29988.3	K-GNKPWVSLPK-G	000000000000	231	240	563.328	2	6.5255	0.0353562	5
AK102423	Os02g0105900	Similar to 40S ribosomal protein S4. (Os02t0105900-01), Similar to 40S ribosomal protein S4. (Os02t0105900-02), Similar to 40S ribosomal protein S4. (Os02t0105900-03)	29988.3	R-KRDAAAQAAANA--	00000000000000	254	265	579.302	2	-3.80199	0.0469509	5
AK059539	Os02g0107000	Similar to U5 small nuclear ribonucleoprotein 200 kDa helicase (EC 3.6.1.-) (U5 snRNP-specific 200 kDa protein) (U5-200KD) (Activating signal cointegrator 1 complex subunit 3-like 1). (Os02t0107000-01)	43847.1	K-ANALLQAHFSR-H	0000000000000	132	142	614.337	2	6.82849	0.00356874	1
AK073200	Os02g0110400	Sugar transporter, conserved site domain containing protein. (Os02t0110400-01)	82702.3	R-ADLALQFFR-F	00000000000	116	124	540.798	2	4.52849	0.000272209	1
AF324485	Os02g0112900	Similar to Viroid RNA-binding protein (Fragment). (Os02t0112900-00)	53320.4	K-ELISMFTAR-E	00000300000	119	127	542.282	2	5.45196	0.00312218	2
AF324485	Os02g0112900	Similar to Viroid RNA-binding protein (Fragment). (Os02t0112900-00)	53320.4	K-VFFTNSGSEANDSQVK-I	000000000000000000	132	147	865.409	2	4.72955	1.08573e-09	2
AK073508	Os02g0114200	Serine carboxypeptidase III precursor (EC 3.4.16.5). (Os02t0114200-01), Similar to Serine carboxypeptidase 3. (Os02t0114200-02)	56120.9	K-ANEGIHINLK-G	000000000000	235	244	554.812	2	6.15163	0.00370317	1
AK065094	Os02g0115700	Catalase isozyme A (EC 1.11.1.6) (CAT-A). (Os02t0115700-01), Similar to Catalase. (Os02t0115700-02), Similar to Catalase. (Os02t0115700-03)	57230.4	R-GPILLEDYHLIEK-V	000000000000000	38	50	770.429	2	5.48785	6.03743e-07	2
AK065094	Os02g0115700	Catalase isozyme A (EC 1.11.1.6) (CAT-A). (Os02t0115700-01), Similar to Catalase. (Os02t0115700-02), Similar to Catalase. (Os02t0115700-03)	57230.4	R-LGPNYLMLPVNAPK-C	0000000000000000	356	369	763.933	2	12.204	0.000173428	2
AK065743	Os02g0115900	Endosperm lumenal binding protein. (Os02t0115900-01), Endosperm lumenal binding protein. (Os02t0115900-02), Similar to Endosperm lumenal binding protein. (Os02t0115900-03)	73629	K-NGHVEIIANDQGNR-I	0000000000000000	52	65	768.884	2	5.83898	0.000227885	23
AK065743	Os02g0115900	Endosperm lumenal binding protein. (Os02t0115900-01), Endosperm lumenal binding protein. (Os02t0115900-02), Similar to Endosperm lumenal binding protein. (Os02t0115900-03)	73629	R-ITPSWVAFTDSER-L	000000000000000	66	78	754.877	2	6.20962	4.65367e-05	23
AK065743	Os02g0115900	Endosperm lumenal binding protein. (Os02t0115900-01), Endosperm lumenal binding protein. (Os02t0115900-02), Similar to Endosperm lumenal binding protein. (Os02t0115900-03)	73629	R-KFEDKEVQR-D	00000000000	106	114	589.815	2	5.68992	0.0115771	23
AK065743	Os02g0115900	Endosperm lumenal binding protein. (Os02t0115900-01), Endosperm lumenal binding protein. (Os02t0115900-02), Similar to Endosperm lumenal binding protein. (Os02t0115900-03)	73629	K-IVNKDGKPYIQVK-I	000000000000000	123	135	501.296	3	0.510676	0.0060151	23
AK065743	Os02g0115900	Endosperm lumenal binding protein. (Os02t0115900-01), Endosperm lumenal binding protein. (Os02t0115900-02), Similar to Endosperm lumenal binding protein. (Os02t0115900-03)	73629	K-VFSPEEVSAMILGK-M	0000000000000000	143	156	753.905	2	10.6346	0.0224406	23
AK065743	Os02g0115900	Endosperm lumenal binding protein. (Os02t0115900-01), Endosperm lumenal binding protein. (Os02t0115900-02), Similar to Endosperm lumenal binding protein. (Os02t0115900-03)	73629	K-MKETAEAYLGK-K	0300000000000	157	167	628.817	2	5.7147	3.16498e-05	23
AK065743	Os02g0115900	Endosperm lumenal binding protein. (Os02t0115900-01), Endosperm lumenal binding protein. (Os02t0115900-02), Similar to Endosperm lumenal binding protein. (Os02t0115900-03)	73629	K-INDAVVTVPAYFNDAQR-Q	0000000000000000000	169	185	946.984	2	5.10199	0.00709936	23
AK065743	Os02g0115900	Endosperm lumenal binding protein. (Os02t0115900-01), Endosperm lumenal binding protein. (Os02t0115900-02), Similar to Endosperm lumenal binding protein. (Os02t0115900-03)	73629	K-DAGVIAGLNVAR-I	00000000000000	190	201	578.331	2	5.34815	6.55093e-06	23
AK065743	Os02g0115900	Endosperm lumenal binding protein. (Os02t0115900-01), Endosperm lumenal binding protein. (Os02t0115900-02), Similar to Endosperm lumenal binding protein. (Os02t0115900-03)	73629	R-ARFEELNNDLFR-K	00000000000000	329	340	762.388	2	5.50901	9.34197e-05	23
AK065743	Os02g0115900	Endosperm lumenal binding protein. (Os02t0115900-01), Endosperm lumenal binding protein. (Os02t0115900-02), Similar to Endosperm lumenal binding protein. (Os02t0115900-03)	73629	K-SQIHEIVLVGGSTR-I	0000000000000000	358	371	748.42	2	6.65602	0.000127293	23
AK065743	Os02g0115900	Endosperm lumenal binding protein. (Os02t0115900-01), Endosperm lumenal binding protein. (Os02t0115900-02), Similar to Endosperm lumenal binding protein. (Os02t0115900-03)	73629	R-DYFEGKEPNK-G	000000000000	381	390	613.79	2	3.48246	0.0125319	23
AK065743	Os02g0115900	Endosperm lumenal binding protein. (Os02t0115900-01), Endosperm lumenal binding protein. (Os02t0115900-02), Similar to Endosperm lumenal binding protein. (Os02t0115900-03)	73629	R-NTVIPTKK-S	0000000000	446	453	450.783	2	7.27845	0.00859447	23
AK065743	Os02g0115900	Endosperm lumenal binding protein. (Os02t0115900-01), Endosperm lumenal binding protein. (Os02t0115900-02), Similar to Endosperm lumenal binding protein. (Os02t0115900-03)	73629	K-ITITNEKGR-L	00000000000	530	538	516.302	2	11.6221	0.00121295	23
AK065743	Os02g0115900	Endosperm lumenal binding protein. (Os02t0115900-01), Endosperm lumenal binding protein. (Os02t0115900-02), Similar to Endosperm lumenal binding protein. (Os02t0115900-03)	73629	K-GRLSQEEIDR-M	000000000000	537	546	601.813	2	4.65344	0.0206782	23
AK065743	Os02g0115900	Endosperm lumenal binding protein. (Os02t0115900-01), Endosperm lumenal binding protein. (Os02t0115900-02), Similar to Endosperm lumenal binding protein. (Os02t0115900-03)	73629	R-EAEEFAEEDKK-V	0000000000000	550	560	662.802	2	5.42771	0.0148957	23
AK065743	Os02g0115900	Endosperm lumenal binding protein. (Os02t0115900-01), Endosperm lumenal binding protein. (Os02t0115900-02), Similar to Endosperm lumenal binding protein. (Os02t0115900-03)	73629	R-EAEEFAEEDKKVK-E	000000000000000	550	562	776.385	2	6.09234	0.00305808	23
AK065743	Os02g0115900	Endosperm lumenal binding protein. (Os02t0115900-01), Endosperm lumenal binding protein. (Os02t0115900-02), Similar to Endosperm lumenal binding protein. (Os02t0115900-03)	73629	R-NQLETYVYNMK-N	0000000000000	569	579	701.839	2	2.48419	0.000160202	23
AK065743	Os02g0115900	Endosperm lumenal binding protein. (Os02t0115900-01), Endosperm lumenal binding protein. (Os02t0115900-02), Similar to Endosperm lumenal binding protein. (Os02t0115900-03)	73629	R-NQLETYVYNMK-N	0000000000300	569	579	709.838	2	4.14813	0.00019249	23
AK065743	Os02g0115900	Endosperm lumenal binding protein. (Os02t0115900-01), Endosperm lumenal binding protein. (Os02t0115900-02), Similar to Endosperm lumenal binding protein. (Os02t0115900-03)	73629	K-LADKLESEEKEK-V	00000000000000	588	599	709.877	2	7.11954	0.00153526	23
AK065743	Os02g0115900	Endosperm lumenal binding protein. (Os02t0115900-01), Endosperm lumenal binding protein. (Os02t0115900-02), Similar to Endosperm lumenal binding protein. (Os02t0115900-03)	73629	R-TGGAPGGGADGEGGVDDEHDEL--	000000000000000000000000	644	665	1006.42	2	6.91712	4.63354e-05	23
AK061815	Os02g0117400	Peptidase A22B, signal peptide peptidase domain containing protein. (Os02t0117400-01)	38394.2	R-AANLALAGLSLAPLVVK-V	0000000000000000000	7	23	811.014	2	9.56642	0.0242103	1
AK061815	Os02g0117400	Peptidase A22B, signal peptide peptidase domain containing protein. (Os02t0117400-01)	38394.2	K-AEEEDAVEEDTDSK-Q	0000000000000000	324	337	783.822	2	4.45573	0.000894114	1
AK071248	Os02g0117700	UDP-glucose pyrophosphorylase (UGPase)2. (Os02t0117700-01)	51864.2	K-IFNTNNLWVNLK-A	00000000000000	289	300	738.41	2	8.57247	2.90286e-05	8
AK071248	Os02g0117700	UDP-glucose pyrophosphorylase (UGPase)2. (Os02t0117700-01)	51864.2	K-MEIIPNPK-E	0300000000	313	320	479.261	2	8.3587	0.00408266	8
AK071248	Os02g0117700	UDP-glucose pyrophosphorylase (UGPase)2. (Os02t0117700-01)	51864.2	K-MEIIPNPK-E	0000000000	313	320	471.262	2	3.57657	0.0108434	8
AK071248	Os02g0117700	UDP-glucose pyrophosphorylase (UGPase)2. (Os02t0117700-01)	51864.2	K-VLQLETAAGAAIR-F	000000000000000	327	339	656.886	2	5.24139	2.95448e-08	8
AK071248	Os02g0117700	UDP-glucose pyrophosphorylase (UGPase)2. (Os02t0117700-01)	51864.2	R-TNPSNPSIELGPEFK-K	00000000000000000	385	399	815.413	2	3.86737	0.00133581	8
AK071248	Os02g0117700	UDP-glucose pyrophosphorylase (UGPase)2. (Os02t0117700-01)	51864.2	R-TNPSNPSIELGPEFKK-V	000000000000000000	385	400	879.46	2	3.31567	1.53822e-06	8
AK071248	Os02g0117700	UDP-glucose pyrophosphorylase (UGPase)2. (Os02t0117700-01)	51864.2	R-FKSIPSIVELDTLK-V	0000000000000000	408	421	795.463	2	1.90769	0.00112711	8
AK071248	Os02g0117700	UDP-glucose pyrophosphorylase (UGPase)2. (Os02t0117700-01)	51864.2	K-SIPSIVELDTLK-V	00000000000000	410	421	657.884	2	6.42287	0.000727989	8
J090056H01	Os02g0118900	NB-ARC domain containing protein. (Os02t0118900-00)	61944.8	R-KIQYKWR-S	000000000	316	322	511.308	2	13.9397	0.00789202	1
AK102774	Os02g0119400	Similar to Syntaxin 52 (AtSYP52). (Os02t0119400-01), Similar to Syntaxin 52 (AtSYP52). (Os02t0119400-02)	26076.8	K-HIALAVNEELTLHTR-L	00000000000000000	158	172	572.99	3	8.62901	0.0456033	1
AK068133	Os02g0119800	Similar to Aminoalcoholphosphotransferase. (Os02t0119800-01), Similar to ethanolaminephosphotransferase. (Os02t0119800-02)	44339.7	M-GYVGQHGVATLR-R	00000000000000	2	13	629.344	2	8.91881	0.0148958	1
Os02g0120900	Os02g0120900	Tetrahydrofolate dehydrogenase/cyclohydrolase family protein. (Os02t0120900-01)	39831.2	R-SNIVGMPAALLLQK-A	0000000000000000	247	260	727.931	2	10.4584	0.00900356	3
Os02g0120900	Os02g0120900	Tetrahydrofolate dehydrogenase/cyclohydrolase family protein. (Os02t0120900-01)	39831.2	K-ANATVSIVHSNTK-K	000000000000000	261	273	671.365	2	7.54359	0.000265975	3
Os02g0120900	Os02g0120900	Tetrahydrofolate dehydrogenase/cyclohydrolase family protein. (Os02t0120900-01)	39831.2	K-ANATVSIVHSNTKKPEEITR-Q	0000000000000000000000	261	280	732.403	3	8.07797	0.00146223	3
AK061894	Os02g0121300	Cyclophilin 2. (Os02t0121300-01), Cyclophilin 2. (Os02t0121300-02)	18704.2	R-VFFDMTVGGAPAGR-I	0000030000000000	6	19	720.857	2	8.69798	3.54232e-08	16
AK061894	Os02g0121300	Cyclophilin 2. (Os02t0121300-01), Cyclophilin 2. (Os02t0121300-02)	18704.2	R-VFFDMTVGGAPAGR-I	0000000000000000	6	19	712.861	2	11.0533	0.0006707	16
AK061894	Os02g0121300	Cyclophilin 2. (Os02t0121300-01), Cyclophilin 2. (Os02t0121300-02)	18704.2	R-IVMELYAK-D	0003000000	20	27	491.771	2	7.75869	0.0352663	16
AK061894	Os02g0121300	Cyclophilin 2. (Os02t0121300-01), Cyclophilin 2. (Os02t0121300-02)	18704.2	R-IVMELYAK-D	0000000000	20	27	483.774	2	8.00994	0.0147703	16
AK061894	Os02g0121300	Cyclophilin 2. (Os02t0121300-01), Cyclophilin 2. (Os02t0121300-02)	18704.2	R-IVMELYAKDVPR-T	00000000000000	20	31	717.4	2	7.11737	4.39146e-06	16
AK061894	Os02g0121300	Cyclophilin 2. (Os02t0121300-01), Cyclophilin 2. (Os02t0121300-02)	18704.2	R-IVMELYAKDVPR-T	00030000000000	20	31	725.398	2	7.5917	0.0116257	16
AK061894	Os02g0121300	Cyclophilin 2. (Os02t0121300-01), Cyclophilin 2. (Os02t0121300-02)	18704.2	R-GNGTGGESIYGEK-F	000000000000000	77	89	634.795	2	5.22531	0.00208187	16
AK061894	Os02g0121300	Cyclophilin 2. (Os02t0121300-01), Cyclophilin 2. (Os02t0121300-02)	18704.2	R-VVEGMDVVK-A	00000000000	139	147	488.267	2	9.28488	2.3902e-05	16
AK061894	Os02g0121300	Cyclophilin 2. (Os02t0121300-01), Cyclophilin 2. (Os02t0121300-02)	18704.2	R-VVEGMDVVK-A	00000300000	139	147	496.263	2	6.87941	0.0462757	16
AK061894	Os02g0121300	Cyclophilin 2. (Os02t0121300-01), Cyclophilin 2. (Os02t0121300-02)	18704.2	R-VVEGMDVVKAIEK-V	000000000000000	139	151	708.896	2	6.27313	0.000149906	16
AK061894	Os02g0121300	Cyclophilin 2. (Os02t0121300-01), Cyclophilin 2. (Os02t0121300-02)	18704.2	R-GGSTAKPVVIADCGQLS--	0000000000000000000	156	172	837.434	2	4.95561	0.00232004	16
AK121653	Os02g0122000	Similar to P18. (Os02t0122000-01)	17203.9	K-VGGHHQNEEFAVR-G	000000000000000	50	62	493.911	3	6.68474	0.00238458	4
AK121653	Os02g0122000	Similar to P18. (Os02t0122000-01)	17203.9	R-ELTDLVKEVALAAR-K	0000000000000000	82	95	764.447	2	7.75201	0.0107343	4
AK121653	Os02g0122000	Similar to P18. (Os02t0122000-01)	17203.9	K-EVGSTFSYGHGR-G	00000000000000	118	129	648.801	2	-1.14827	0.000181309	4
AK106553	Os02g0122300	Translation initiation factor eIF3 subunit domain containing protein. (Os02t0122300-01)	25773.8	K-SESDFAEYAELIANK-L	00000000000000000	127	141	843.901	2	5.50479	0.000227876	2
AK106553	Os02g0122300	Translation initiation factor eIF3 subunit domain containing protein. (Os02t0122300-01)	25773.8	K-DISSSIAAIANEK-I	000000000000000	173	185	659.849	2	4.82004	0.0302071	2
011-007-G12	Os02g0123300	Similar to Eukaryotic translation initiation factor 3 subunit 8 (eIF3 p110) (eIF3c) (p105). (Os02t0123300-00)	44664.4	R-VKELLAQGVQQSR-Y	000000000000000	60	72	728.42	2	3.70459	0.000239389	3
011-007-G12	Os02g0123300	Similar to Eukaryotic translation initiation factor 3 subunit 8 (eIF3 p110) (eIF3c) (p105). (Os02t0123300-00)	44664.4	K-ELLAQGVQQSR-Y	0000000000000	62	72	614.841	2	7.89879	0.0433309	3
AK070168	Os02g0123500	Similar to NADPH-dependent mannose 6-phosphate reductase. (Os02t0123500-01), Similar to NADP-dependent D-sorbitol-6-phosphate dehydrogenase. (Os02t0123500-02)	42202.6	K-REDLFITTK-L	00000000000	134	142	561.814	2	5.27309	0.0349749	1
AK063621	Os02g0126700	Similar to Small nuclear ribonucleoprotein homolog. (Os02t0126700-01)	10335.6	R-IMTQPINLIFR-F	0000000000000	9	19	673.389	2	2.81338	0.00458711	2
AK063621	Os02g0126700	Similar to Small nuclear ribonucleoprotein homolog. (Os02t0126700-01)	10335.6	R-IQIWLFEQK-D	00000000000	27	35	602.844	2	7.35845	0.00848228	2
AK071820	Os02g0126800	Similar to Golgi SNARE 12 protein (AtGOS12) (Golgi SNAP receptor complex member 1-2). (Os02t0126800-01)	27106.1	R-SSSAADAASASSPSER-S	000000000000000000	50	65	740.833	2	5.81845	2.72516e-06	1
AK060422	Os02g0127700	Similar to Ribose-phosphate pyrophosphokinase. (Os02t0127700-01), Ribose-phosphate pyrophosphokinase 1 (EC 2.7.6.1) (Phosphoribosyl pyrophosphate synthetase 1). (Os02t0127700-02)	43537.7	K-LVANMITEAGANR-V	000000000000000	187	199	680.362	2	8.07438	0.014875	1
Os02g0128100	Os02g0128100	Hypothetical conserved gene. (Os02t0128100-00)	19012.6	K-VVAAAAAAAAAGNVQR-R	000000000000000000	45	60	705.898	2	5.45971	0.00133417	1
AK103009	Os02g0128600	Similar to ADP-ribosylation factor-like protein. (Os02t0128600-01)	21856.3	K-NVVFTVWDVGGQEK-L	0000000000000000	60	73	789.409	2	8.94277	1.23389e-06	1
AK106464	Os02g0130000	Similar to SWIb domain-containing protein (Fragment). (Os02t0130000-01)	13854.3	K-RPASASASASAAGAK-V	00000000000000000	22	36	651.844	2	4.26175	0.00840349	6
AK106464	Os02g0130000	Similar to SWIb domain-containing protein (Fragment). (Os02t0130000-01)	13854.3	K-RGIMQPVPVSDALSR-F	00000000000000000	49	63	813.446	2	3.54418	0.0407678	6
AK106464	Os02g0130000	Similar to SWIb domain-containing protein (Fragment). (Os02t0130000-01)	13854.3	R-GIMQPVPVSDALSR-F	0000000000000000	50	63	735.398	2	7.25457	2.17213e-05	6
AK106464	Os02g0130000	Similar to SWIb domain-containing protein (Fragment). (Os02t0130000-01)	13854.3	R-GIMQPVPVSDALSR-F	0003000000000000	50	63	743.397	2	8.71069	0.0017237	6
AK106464	Os02g0130000	Similar to SWIb domain-containing protein (Fragment). (Os02t0130000-01)	13854.3	R-FAGGAPEMSR-A	000000000000	64	73	511.743	2	6.33619	0.0317617	6
AK106464	Os02g0130000	Similar to SWIb domain-containing protein (Fragment). (Os02t0130000-01)	13854.3	K-ANGLQNPANKR-E	0000000000000	86	96	591.824	2	5.12653	0.0253126	6
AK066913	Os02g0131300	Conserved hypothetical protein. (Os02t0131300-01), Non-protein coding transcript. (Os02t0131300-02)	27393.6	K-KFETALGVLK-K	000000000000	57	66	553.338	2	5.73429	0.0080481	11
AK066913	Os02g0131300	Conserved hypothetical protein. (Os02t0131300-01), Non-protein coding transcript. (Os02t0131300-02)	27393.6	K-KFETALGVLKK-E	0000000000000	57	67	617.385	2	5.14347	0.00338182	11
AK066913	Os02g0131300	Conserved hypothetical protein. (Os02t0131300-01), Non-protein coding transcript. (Os02t0131300-02)	27393.6	K-FETALGVLKK-E	000000000000	58	67	553.338	2	6.60175	0.0347545	11
AK066913	Os02g0131300	Conserved hypothetical protein. (Os02t0131300-01), Non-protein coding transcript. (Os02t0131300-02)	27393.6	K-EKITIDPDDPAAVSR-Y	00000000000000000	68	82	813.923	2	3.58633	0.0023764	11
AK066913	Os02g0131300	Conserved hypothetical protein. (Os02t0131300-01), Non-protein coding transcript. (Os02t0131300-02)	27393.6	K-ITIDPDDPAAVSR-Y	000000000000000	70	82	685.356	2	6.72716	0.0266742	11
AK066913	Os02g0131300	Conserved hypothetical protein. (Os02t0131300-01), Non-protein coding transcript. (Os02t0131300-02)	27393.6	R-QKADLLSDSER-I	2000000000000	92	102	622.813	2	5.52092	0.00124392	11
AK066913	Os02g0131300	Conserved hypothetical protein. (Os02t0131300-01), Non-protein coding transcript. (Os02t0131300-02)	27393.6	R-QKADLLSDSER-I	0000000000000	92	102	631.326	2	5.30787	0.0160748	11
AK066913	Os02g0131300	Conserved hypothetical protein. (Os02t0131300-01), Non-protein coding transcript. (Os02t0131300-02)	27393.6	R-TYLNTLQEIR-I	000000000000	119	128	625.845	2	6.40894	0.000532616	11
AK066913	Os02g0131300	Conserved hypothetical protein. (Os02t0131300-01), Non-protein coding transcript. (Os02t0131300-02)	27393.6	K-EIKKPLLR-S	0000000000	153	160	498.835	2	6.45404	0.0329977	11
AK066913	Os02g0131300	Conserved hypothetical protein. (Os02t0131300-01), Non-protein coding transcript. (Os02t0131300-02)	27393.6	K-NMGLLLAEFEK-I	0000000000000	165	175	632.84	2	9.45974	0.0100045	11
AK109376	Os02g0133800	Proteasome subunit alpha type 1 (EC 3.4.25.1) (20S proteasome alpha subunit F) (20S proteasome subunit alpha-6) (Proteasome component C2). (Os02t0133800-01), Similar to Proteasome subunit alpha type. (Os02t0133800-02)	29966.9	R-NQYDTDVTTWSPAGR-L	00000000000000000	4	18	855.894	2	5.54157	0.000484348	9
AK109376	Os02g0133800	Proteasome subunit alpha type 1 (EC 3.4.25.1) (20S proteasome alpha subunit F) (20S proteasome subunit alpha-6) (Proteasome component C2). (Os02t0133800-01), Similar to Proteasome subunit alpha type. (Os02t0133800-02)	29966.9	R-LFQVEYAMEAVK-Q	00000000300000	19	30	722.367	2	5.90766	2.52411e-07	9
AK109376	Os02g0133800	Proteasome subunit alpha type 1 (EC 3.4.25.1) (20S proteasome alpha subunit F) (20S proteasome subunit alpha-6) (Proteasome component C2). (Os02t0133800-01), Similar to Proteasome subunit alpha type. (Os02t0133800-02)	29966.9	R-LFQVEYAMEAVK-Q	00000000000000	19	30	714.372	2	8.74475	6.90514e-05	9
AK109376	Os02g0133800	Proteasome subunit alpha type 1 (EC 3.4.25.1) (20S proteasome alpha subunit F) (20S proteasome subunit alpha-6) (Proteasome component C2). (Os02t0133800-01), Similar to Proteasome subunit alpha type. (Os02t0133800-02)	29966.9	R-SRTHAVLAAANK-A	00000000000000	40	51	619.855	2	5.29237	0.00589961	9
AK109376	Os02g0133800	Proteasome subunit alpha type 1 (EC 3.4.25.1) (20S proteasome alpha subunit F) (20S proteasome subunit alpha-6) (Proteasome component C2). (Os02t0133800-01), Similar to Proteasome subunit alpha type. (Os02t0133800-02)	29966.9	R-THAVLAAANK-A	000000000000	42	51	498.287	2	4.46931	0.00360582	9
AK109376	Os02g0133800	Proteasome subunit alpha type 1 (EC 3.4.25.1) (20S proteasome alpha subunit F) (20S proteasome subunit alpha-6) (Proteasome component C2). (Os02t0133800-01), Similar to Proteasome subunit alpha type. (Os02t0133800-02)	29966.9	K-AASELSSHQR-K	000000000000	52	61	543.274	2	6.73693	0.0101689	9
AK109376	Os02g0133800	Proteasome subunit alpha type 1 (EC 3.4.25.1) (20S proteasome alpha subunit F) (20S proteasome subunit alpha-6) (Proteasome component C2). (Os02t0133800-01), Similar to Proteasome subunit alpha type. (Os02t0133800-02)	29966.9	R-VADHAGVALAGLTADGR-V	0000000000000000000	66	82	797.426	2	6.84452	0.000171895	9
AK100570	Os02g0135700	DNA polymerase V family protein. (Os02t0135700-01), Hypothetical conserved gene. (Os02t0135700-02)	146100	R-QSAESDAAAAKPK-Q	000000000000000	60	72	637.322	2	-1.71264	0.0422599	1
AK068480	Os02g0137400	WD40 repeat-like domain containing protein. (Os02t0137400-01)	95501.1	R-FLAVGSFDNTIR-I	00000000000000	228	239	670.357	2	4.92349	0.000972813	4
AK068480	Os02g0137400	WD40 repeat-like domain containing protein. (Os02t0137400-01)	95501.1	R-TNVDMVTGQLSDTR-S	0000000000000000	299	312	768.874	2	5.21347	0.000145918	4
AK068480	Os02g0137400	WD40 repeat-like domain containing protein. (Os02t0137400-01)	95501.1	R-LLAGVGSVLR-L	000000000000	588	597	492.817	2	7.3719	0.000775161	4
AK068480	Os02g0137400	WD40 repeat-like domain containing protein. (Os02t0137400-01)	95501.1	R-LPQDLSDEIEEDPTGGK-I	0000000000000000000	687	703	921.941	2	8.04281	0.0311558	4
AK103804	Os02g0139200	Skb1 methyltransferase family protein. (Os02t0139200-01), Skb1 methyltransferase family protein. (Os02t0139200-02)	73408.9	R-AAILQTNAFLTNAR-G	0000000000000000	222	235	752.422	2	6.42724	4.35365e-08	2
AK103804	Os02g0139200	Skb1 methyltransferase family protein. (Os02t0139200-01), Skb1 methyltransferase family protein. (Os02t0139200-02)	73408.9	R-ASLQAAEETGR-K	0000000000000	387	397	566.787	2	6.98763	4.66141e-06	2
AK121266	Os02g0139600	Similar to Dars-prov protein. (Os02t0139600-01), Similar to predicted protein. (Os02t0139600-02)	18946.6	R-GEEIISGAQR-V	000000000000	87	96	530.277	2	4.02997	4.64629e-05	1
AK121058	Os02g0141000	Butirosin biosynthesis, BtrG-like domain containing protein. (Os02t0141000-01)	17578.8	R-SPSSSPAVLPNHQR-F	0000000000000000	29	42	738.886	2	6.65258	0.0203602	1
AK067279	Os02g0141300	Ribosomal protein S5 domain 2-type fold domain containing protein. (Os02t0141300-01), Ribosomal protein S5 domain 2-type fold domain containing protein. (Os02t0141300-02)	111075	K-IGYGTVSEALAYK-L	000000000000000	298	310	686.365	2	4.94489	0.00104033	3
AK067279	Os02g0141300	Ribosomal protein S5 domain 2-type fold domain containing protein. (Os02t0141300-01), Ribosomal protein S5 domain 2-type fold domain containing protein. (Os02t0141300-02)	111075	K-ELVSIPTHIR-F	000000000000	721	730	582.843	2	4.39484	0.027028	3
AK067279	Os02g0141300	Ribosomal protein S5 domain 2-type fold domain containing protein. (Os02t0141300-01), Ribosomal protein S5 domain 2-type fold domain containing protein. (Os02t0141300-02)	111075	K-TSQDGGPSLFGAK-I	000000000000000	922	934	632.816	2	6.59354	0.0244823	3
AK063330	Os02g0143100	Similar to Sucrose-phosphatase (EC 3.1.3.24). (Os02t0143100-01)	47864.1	R-NIVVEETANVSELK-L	0000000000000000	105	118	772.916	2	5.43526	2.0122e-07	5
AK063330	Os02g0143100	Similar to Sucrose-phosphatase (EC 3.1.3.24). (Os02t0143100-01)	47864.1	K-IIYSGGQDLDVLPQGAGK-G	00000000000000000000	159	176	915.988	2	5.28173	1.76225e-06	5
AK063330	Os02g0143100	Similar to Sucrose-phosphatase (EC 3.1.3.24). (Os02t0143100-01)	47864.1	K-GQALAYLLK-K	00000000000	177	185	488.797	2	4.99287	3.10363e-05	5
AK063330	Os02g0143100	Similar to Sucrose-phosphatase (EC 3.1.3.24). (Os02t0143100-01)	47864.1	K-GQALAYLLKK-L	000000000000	177	186	552.845	2	5.54043	0.000322894	5
AK063330	Os02g0143100	Similar to Sucrose-phosphatase (EC 3.1.3.24). (Os02t0143100-01)	47864.1	K-ENPVKPTDAVVK-F	00000000000000	277	288	648.865	2	5.05267	4.01364e-05	5
AK073620	Os02g0146600	Similar to Eukaryotic initiation factor 4A (eIF4A) (eIF-4A). (Os02t0146600-01)	47463.2	R-GIYAYGFEKPSAIQQR-G	000000000000000000	55	70	914.477	2	4.59552	1.66901e-05	22
AK073620	Os02g0146600	Similar to Eukaryotic initiation factor 4A (eIF4A) (eIF-4A). (Os02t0146600-01)	47463.2	K-GLDVIQQAQSGTGK-T	0000000000000000	78	91	701.374	2	5.27607	4.29959e-08	22
AK073620	Os02g0146600	Similar to Eukaryotic initiation factor 4A (eIF4A) (eIF-4A). (Os02t0146600-01)	47463.2	R-ELAQQIEK-V	0000000000	120	127	479.767	2	5.68089	0.00835605	22
AK073620	Os02g0146600	Similar to Eukaryotic initiation factor 4A (eIF4A) (eIF-4A). (Os02t0146600-01)	47463.2	R-ALGDYLGVK-V	00000000000	131	139	468.266	2	4.54123	0.0244303	22
AK073620	Os02g0146600	Similar to Eukaryotic initiation factor 4A (eIF4A) (eIF-4A). (Os02t0146600-01)	47463.2	R-ILASGVHVVVGTPGR-V	00000000000000000	155	169	731.433	2	2.86629	5.52488e-09	22
AK073620	Os02g0146600	Similar to Eukaryotic initiation factor 4A (eIF4A) (eIF-4A). (Os02t0146600-01)	47463.2	K-MFVLDEADEMLSR-G	000000000000000	186	198	778.365	2	6.0338	0.0365258	22
AK073620	Os02g0146600	Similar to Eukaryotic initiation factor 4A (eIF4A) (eIF-4A). (Os02t0146600-01)	47463.2	K-IQVGVFSATMPPEALEITR-K	000000000030000000000	215	233	1038.05	2	4.40923	1.33797e-05	22
AK073620	Os02g0146600	Similar to Eukaryotic initiation factor 4A (eIF4A) (eIF-4A). (Os02t0146600-01)	47463.2	K-IQVGVFSATMPPEALEITR-K	000000000000000000000	215	233	1030.05	2	6.3652	0.00335107	22
AK073620	Os02g0146600	Similar to Eukaryotic initiation factor 4A (eIF4A) (eIF-4A). (Os02t0146600-01)	47463.2	K-RDELTLEGIK-Q	000000000000	246	255	587.33	2	4.40298	2.54923e-05	22
AK073620	Os02g0146600	Similar to Eukaryotic initiation factor 4A (eIF4A) (eIF-4A). (Os02t0146600-01)	47463.2	R-RKVDWLTDK-M	00000000000	291	299	580.829	2	7.17853	0.000449067	22
AK073620	Os02g0146600	Similar to Eukaryotic initiation factor 4A (eIF4A) (eIF-4A). (Os02t0146600-01)	47463.2	R-DHTVSATHGDMDQNTR-D	000000000003000000	304	319	900.887	2	5.71381	0.0102841	22
AK073620	Os02g0146600	Similar to Eukaryotic initiation factor 4A (eIF4A) (eIF-4A). (Os02t0146600-01)	47463.2	R-VLITTDLLAR-G	000000000000	333	342	557.849	2	6.34312	5.1984e-07	22
AK073620	Os02g0146600	Similar to Eukaryotic initiation factor 4A (eIF4A) (eIF-4A). (Os02t0146600-01)	47463.2	R-KGVAINFVTR-D	000000000000	377	386	552.833	2	5.51885	1.71985e-05	22
AK073620	Os02g0146600	Similar to Eukaryotic initiation factor 4A (eIF4A) (eIF-4A). (Os02t0146600-01)	47463.2	R-KGVAINFVTRDDER-M	0000000000000000	377	390	810.437	2	9.80706	0.0178625	22
AK073620	Os02g0146600	Similar to Eukaryotic initiation factor 4A (eIF4A) (eIF-4A). (Os02t0146600-01)	47463.2	K-GVAINFVTR-D	00000000000	378	386	488.785	2	5.52083	0.00109702	22
AK073620	Os02g0146600	Similar to Eukaryotic initiation factor 4A (eIF4A) (eIF-4A). (Os02t0146600-01)	47463.2	K-GVAINFVTRDDER-M	000000000000000	378	390	497.926	3	5.49278	0.0151168	22
AK073620	Os02g0146600	Similar to Eukaryotic initiation factor 4A (eIF4A) (eIF-4A). (Os02t0146600-01)	47463.2	R-MLFDIQR-F	000000000	391	397	461.747	2	5.36549	0.00088725	22
AK073620	Os02g0146600	Similar to Eukaryotic initiation factor 4A (eIF4A) (eIF-4A). (Os02t0146600-01)	47463.2	R-MLFDIQR-F	030000000	391	397	469.745	2	7.3625	0.00335096	22
AK105609	Os02g0146700	Similar to predicted protein. (Os02t0146700-01), Similar to PSMD2 subunit (Fragment). (Os02t0146700-02)	98734.8	R-NLAGEIAQEFQK-R	00000000000000	161	172	674.353	2	6.13106	1.3409e-06	5
AK105609	Os02g0146700	Similar to predicted protein. (Os02t0146700-01), Similar to PSMD2 subunit (Fragment). (Os02t0146700-02)	98734.8	R-NLAGEIAQEFQKR-Q	000000000000000	161	173	752.404	2	6.11706	0.0425705	5
AK105609	Os02g0146700	Similar to predicted protein. (Os02t0146700-01), Similar to PSMD2 subunit (Fragment). (Os02t0146700-02)	98734.8	K-LSEGYLTLAR-D	000000000000	331	340	561.815	2	6.69348	8.47083e-05	5
AK105609	Os02g0146700	Similar to predicted protein. (Os02t0146700-01), Similar to PSMD2 subunit (Fragment). (Os02t0146700-02)	98734.8	K-QESVEATAEVSK-T	00000000000000	582	593	639.317	2	4.06136	0.000693598	5
AK105609	Os02g0146700	Similar to predicted protein. (Os02t0146700-01), Similar to PSMD2 subunit (Fragment). (Os02t0146700-02)	98734.8	R-VGQAVDVVGQAGRPK-T	00000000000000000	835	849	740.919	2	5.50127	3.65065e-06	5
AK068931	Os02g0148500	Similar to TIMING OF CAB 1 (Fragment). (Os02t0148500-01)	35118.8	R-VQAVLLLLGGR-E	0000000000000	126	136	569.873	2	7.38322	8.30709e-05	1
AK120153	Os02g0150300	FAD-dependent pyridine nucleotide-disulphide oxidoreductase domain containing protein. (Os02t0150300-01)	36445.2	R-SMVEPSFAER-S	000000000000	21	30	576.777	2	9.27309	0.0208158	1
AK073007	Os02g0152600	Protein of unknown function DUF2343 domain containing protein. (Os02t0152600-01)	31699.7	K-KLDGFLESR-K	00000000000	241	249	532.793	2	5.43832	0.016733	1
AK073124	Os02g0158100	EF hand domain containing protein. (Os02t0158100-01), Similar to EH-domain-containing protein 1. (Os02t0158100-02)	60814.1	K-VLNTPEVAR-V	00000000000	380	388	499.788	2	6.29667	0.0157573	1
AK066467	Os02g0158600	Conserved hypothetical protein. (Os02t0158600-01)	19329.4	R-SQGGEQALMQTLNR-A	0000000000000000	64	77	766.882	2	5.91746	0.00968896	1
AK108324	Os02g0158900	Similar to SNF4. (Os02t0158900-01)	44745.3	R-ILLQLQDGR-G	00000000000	293	301	528.317	2	4.75851	0.000842991	1
AK101547	Os02g0161900	Polyubiquitin. (Os02t0161900-01)	51155.5	K-TITLEVESSDTIDNVK-A	000000000000000000	12	27	882.453	2	4.7096	0.000135223	108
AK101547	Os02g0161900	Polyubiquitin. (Os02t0161900-01)	51155.5	K-TITLEVESSDTIDNVKAK-I	00000000000000000000	12	29	982.02	2	4.8609	0.00530036	108
AK101547	Os02g0161900	Polyubiquitin. (Os02t0161900-01)	51155.5	K-IQDKEGIPPDQQR-L	000000000000000	30	42	762.398	2	4.44125	7.75015e-05	108
AK101547	Os02g0161900	Polyubiquitin. (Os02t0161900-01)	51155.5	K-QLEDGRTLADYNIQK-E	20000000000000000	49	63	873.943	2	7.73162	0.0331479	108
AK101547	Os02g0161900	Polyubiquitin. (Os02t0161900-01)	51155.5	R-TLADYNIQK-E	00000000000	55	63	533.286	2	6.0071	0.0437177	108
AK101547	Os02g0161900	Polyubiquitin. (Os02t0161900-01)	51155.5	R-TLADYNIQKESTLHLVLR-L	00000000000000000000	55	72	705.396	3	5.64222	2.10065e-05	108
AK101547	Os02g0161900	Polyubiquitin. (Os02t0161900-01)	51155.5	K-ESTLHLVLR-L	00000000000	64	72	534.318	2	7.43752	1.78151e-05	108
AK063787	Os02g0162000	Cytochrome c oxidase, subunit VIIa domain containing protein. (Os02t0162000-01), Cytochrome c oxidase, subunit VIIa domain containing protein. (Os02t0162000-02)	7645.99	K-QQQYFQNLTK-H	200000000000	15	24	640.821	2	6.49401	0.00838528	2
AK063787	Os02g0162000	Cytochrome c oxidase, subunit VIIa domain containing protein. (Os02t0162000-01), Cytochrome c oxidase, subunit VIIa domain containing protein. (Os02t0162000-02)	7645.99	R-GVYNMSHGVGK-K	0000000000000	55	65	574.779	2	-0.666343	0.000979779	2
AK121223	Os02g0162500	Similar to 40S ribosomal protein S14. (Os02t0162500-01)	16423.7	K-EENVTLGPTVR-E	0000000000000	11	21	607.827	2	6.79799	0.037115	3
AK121223	Os02g0162500	Similar to 40S ribosomal protein S14. (Os02t0162500-01)	16423.7	K-TPGPGAQSALR-A	0000000000000	106	116	527.789	2	5.5761	0.0338514	3
AK121223	Os02g0162500	Similar to 40S ribosomal protein S14. (Os02t0162500-01)	16423.7	R-IEDVTPVPTDSTR-R	000000000000000	128	140	715.368	2	7.69674	0.0336321	3
AK121574	Os02g0167300	Tubulin beta-3 chain (Beta-3 tubulin). (Os02t0167300-01), Similar to Tubulin beta-5 chain. (Os02t0167300-02)	50854.2	R-INVYYNEASGGR-F	00000000000000	47	58	671.826	2	5.00576	9.03075e-06	11
AK121574	Os02g0167300	Tubulin beta-3 chain (Beta-3 tubulin). (Os02t0167300-01), Similar to Tubulin beta-5 chain. (Os02t0167300-02)	50854.2	K-GHYTEGAELIDSVLDVVR-K	00000000000000000000	104	121	658.342	3	6.96649	0.046161	11
AK121574	Os02g0167300	Tubulin beta-3 chain (Beta-3 tubulin). (Os02t0167300-01), Similar to Tubulin beta-5 chain. (Os02t0167300-02)	50854.2	R-KLAVNLIPFPR-L	0000000000000	252	262	634.404	2	10.312	0.00943005	11
AK121574	Os02g0167300	Tubulin beta-3 chain (Beta-3 tubulin). (Os02t0167300-01), Similar to Tubulin beta-5 chain. (Os02t0167300-02)	50854.2	K-LAVNLIPFPR-L	000000000000	253	262	570.352	2	2.68168	3.47098e-05	11
AK121574	Os02g0167300	Tubulin beta-3 chain (Beta-3 tubulin). (Os02t0167300-01), Similar to Tubulin beta-5 chain. (Os02t0167300-02)	50854.2	R-LHFFMVGFAPLTSR-G	0000030000000000	263	276	819.929	2	2.60449	3.57288e-06	11
AK121574	Os02g0167300	Tubulin beta-3 chain (Beta-3 tubulin). (Os02t0167300-01), Similar to Tubulin beta-5 chain. (Os02t0167300-02)	50854.2	R-LHFFMVGFAPLTSR-G	0000000000000000	263	276	811.936	2	8.67679	0.0109113	11
AK121574	Os02g0167300	Tubulin beta-3 chain (Beta-3 tubulin). (Os02t0167300-01), Similar to Tubulin beta-5 chain. (Os02t0167300-02)	50854.2	R-YLTASAMFR-G	00000000000	310	318	530.271	2	5.13605	6.13077e-05	11
AK121574	Os02g0167300	Tubulin beta-3 chain (Beta-3 tubulin). (Os02t0167300-01), Similar to Tubulin beta-5 chain. (Os02t0167300-02)	50854.2	K-NSSYFVEWIPNNVK-S	0000000000000000	337	350	848.924	2	4.60289	0.00267324	11
AK121574	Os02g0167300	Tubulin beta-3 chain (Beta-3 tubulin). (Os02t0167300-01), Similar to Tubulin beta-5 chain. (Os02t0167300-02)	50854.2	R-RVSEQFTAMFR-R	0000000000000	380	390	686.349	2	4.3491	0.00425129	11
AK121574	Os02g0167300	Tubulin beta-3 chain (Beta-3 tubulin). (Os02t0167300-01), Similar to Tubulin beta-5 chain. (Os02t0167300-02)	50854.2	R-VSEQFTAMFR-R	000000000000	381	390	608.298	2	4.92686	2.78662e-07	11
AK121574	Os02g0167300	Tubulin beta-3 chain (Beta-3 tubulin). (Os02t0167300-01), Similar to Tubulin beta-5 chain. (Os02t0167300-02)	50854.2	R-VSEQFTAMFR-R	000000003000	381	390	616.297	2	6.7143	7.11268e-05	11
AK069128	Os02g0167700	Armadillo-like helical domain containing protein. (Os02t0167700-01)	136248	K-TIIVEVTTTSLAEK-I	0000000000000000	110	123	752.931	2	4.61132	7.13738e-06	17
AK069128	Os02g0167700	Armadillo-like helical domain containing protein. (Os02t0167700-01)	136248	K-ILVSLAPQLIK-G	0000000000000	124	134	597.899	2	7.78476	5.28955e-05	17
AK069128	Os02g0167700	Armadillo-like helical domain containing protein. (Os02t0167700-01)	136248	K-ATFEVVQLLK-N	000000000000	208	217	574.343	2	5.12934	3.28809e-05	17
AK069128	Os02g0167700	Armadillo-like helical domain containing protein. (Os02t0167700-01)	136248	R-TNIQMIGALSR-S	0000000000000	228	238	602.333	2	5.28695	5.42871e-07	17
AK069128	Os02g0167700	Armadillo-like helical domain containing protein. (Os02t0167700-01)	136248	K-GQGDIDESSPR-W	0000000000000	406	416	580.765	2	4.03261	0.00241124	17
AK069128	Os02g0167700	Armadillo-like helical domain containing protein. (Os02t0167700-01)	136248	R-WLLKQEVPK-V	00000000000	417	425	570.844	2	3.52986	0.0285737	17
AK069128	Os02g0167700	Armadillo-like helical domain containing protein. (Os02t0167700-01)	136248	K-IEALVFTR-L	0000000000	486	493	474.781	2	3.70908	0.000419773	17
AK069128	Os02g0167700	Armadillo-like helical domain containing protein. (Os02t0167700-01)	136248	R-TLDYRPYIGPIYK-A	000000000000000	549	561	799.937	2	5.59107	0.000122123	17
AK069128	Os02g0167700	Armadillo-like helical domain containing protein. (Os02t0167700-01)	136248	R-YKVLPQALILIR-S	00000000000000	725	736	713.965	2	5.27197	0.019915	17
AK069128	Os02g0167700	Armadillo-like helical domain containing protein. (Os02t0167700-01)	136248	K-VLPQALILIR-S	000000000000	727	736	568.385	2	5.07403	0.000340432	17
AK069128	Os02g0167700	Armadillo-like helical domain containing protein. (Os02t0167700-01)	136248	K-SAASYALGNIAVGNLSK-Y	0000000000000000000	867	883	818.442	2	3.73942	1.60085e-06	17
AK069128	Os02g0167700	Armadillo-like helical domain containing protein. (Os02t0167700-01)	136248	K-YLPFILNQIDNQQK-K	0000000000000000	884	897	867.471	2	7.6504	0.00206663	17
AK069128	Os02g0167700	Armadillo-like helical domain containing protein. (Os02t0167700-01)	136248	R-QSVDHTGQSELQDSNIEK-I	20000000000000000000	913	930	999.461	2	5.14677	0.0138453	17
AK069128	Os02g0167700	Armadillo-like helical domain containing protein. (Os02t0167700-01)	136248	R-AAVLALSTAAHNKPNLIK-G	00000000000000000000	1024	1041	916.543	2	2.36268	0.00573796	17
AK069128	Os02g0167700	Armadillo-like helical domain containing protein. (Os02t0167700-01)	136248	K-HVVDDGLELR-K	000000000000	1072	1081	576.807	2	5.38915	0.00485643	17
AK070041	Os02g0169300	Similar to Phosphoglycerate kinase, cytosolic (EC 2.7.2.3). (Os02t0169300-01)	42223.6	R-SVGTLGEADLR-G	0000000000000	6	16	559.299	2	4.69248	6.92398e-05	38
AK070041	Os02g0169300	Similar to Phosphoglycerate kinase, cytosolic (EC 2.7.2.3). (Os02t0169300-01)	42223.6	R-SVGTLGEADLRGK-K	000000000000000	6	18	651.86	2	8.25638	0.00189658	38
AK070041	Os02g0169300	Similar to Phosphoglycerate kinase, cytosolic (EC 2.7.2.3). (Os02t0169300-01)	42223.6	R-ADLNVPLDDAQK-I	00000000000000	24	35	649.837	2	6.06768	0.00227726	38
AK070041	Os02g0169300	Similar to Phosphoglycerate kinase, cytosolic (EC 2.7.2.3). (Os02t0169300-01)	42223.6	R-ADLNVPLDDAQKITDDTR-I	00000000000000000000	24	41	1000.51	2	5.67663	2.81933e-05	38
AK070041	Os02g0169300	Similar to Phosphoglycerate kinase, cytosolic (EC 2.7.2.3). (Os02t0169300-01)	42223.6	K-VILASHLGRPK-G	0000000000000	59	69	595.875	2	4.46486	4.54925e-05	38
AK070041	Os02g0169300	Similar to Phosphoglycerate kinase, cytosolic (EC 2.7.2.3). (Os02t0169300-01)	42223.6	K-YSLKPLVPR-L	00000000000	75	83	536.832	2	5.31358	0.000547036	38
AK070041	Os02g0169300	Similar to Phosphoglycerate kinase, cytosolic (EC 2.7.2.3). (Os02t0169300-01)	42223.6	K-LAAALPEGGVLLLENVR-F	0000000000000000000	106	122	868.016	2	7.77117	8.13198e-10	38
AK070041	Os02g0169300	Similar to Phosphoglycerate kinase, cytosolic (EC 2.7.2.3). (Os02t0169300-01)	42223.6	R-FYKEEEKNDPEFAK-K	0000000000000000	123	136	887.425	2	5.42243	0.000105704	38
AK070041	Os02g0169300	Similar to Phosphoglycerate kinase, cytosolic (EC 2.7.2.3). (Os02t0169300-01)	42223.6	R-FYKEEEKNDPEFAKK-L	00000000000000000	123	137	634.651	3	5.72125	0.0241961	38
AK070041	Os02g0169300	Similar to Phosphoglycerate kinase, cytosolic (EC 2.7.2.3). (Os02t0169300-01)	42223.6	K-KLAAVADLYVNDAFGTAHR-A	000000000000000000000	137	155	678.029	3	4.87443	3.53168e-08	38
AK070041	Os02g0169300	Similar to Phosphoglycerate kinase, cytosolic (EC 2.7.2.3). (Os02t0169300-01)	42223.6	K-LAAVADLYVNDAFGTAHR-A	00000000000000000000	138	155	952.492	2	5.58902	5.88879e-09	38
AK070041	Os02g0169300	Similar to Phosphoglycerate kinase, cytosolic (EC 2.7.2.3). (Os02t0169300-01)	42223.6	K-LAAVADLYVNDAFGTAHRAHASTEGVTK-F	000000000000000000000000000000	138	165	962.494	3	4.97665	0.000235539	38
AK070041	Os02g0169300	Similar to Phosphoglycerate kinase, cytosolic (EC 2.7.2.3). (Os02t0169300-01)	42223.6	K-FLKPAVAGFLMQK-E	000000000000000	166	178	725.422	2	5.98479	1.65109e-05	38
AK070041	Os02g0169300	Similar to Phosphoglycerate kinase, cytosolic (EC 2.7.2.3). (Os02t0169300-01)	42223.6	K-ELDYLVGAVANPK-K	000000000000000	179	191	694.878	2	4.57419	7.89909e-08	38
AK070041	Os02g0169300	Similar to Phosphoglycerate kinase, cytosolic (EC 2.7.2.3). (Os02t0169300-01)	42223.6	K-KPFAAIVGGSK-V	0000000000000	192	202	537.822	2	5.62082	2.54926e-06	38
AK070041	Os02g0169300	Similar to Phosphoglycerate kinase, cytosolic (EC 2.7.2.3). (Os02t0169300-01)	42223.6	K-IGVIESLLAK-V	000000000000	207	216	521.832	2	5.05527	1.85395e-05	38
AK070041	Os02g0169300	Similar to Phosphoglycerate kinase, cytosolic (EC 2.7.2.3). (Os02t0169300-01)	42223.6	K-SLVEEDKLELATSLIEK-A	0000000000000000000	241	257	959.03	2	5.42684	7.24891e-08	38
AK070041	Os02g0169300	Similar to Phosphoglycerate kinase, cytosolic (EC 2.7.2.3). (Os02t0169300-01)	42223.6	K-SLVEEDKLELATSLIEKAK-A	000000000000000000000	241	259	706.065	3	2.72307	0.0108916	38
AK070041	Os02g0169300	Similar to Phosphoglycerate kinase, cytosolic (EC 2.7.2.3). (Os02t0169300-01)	42223.6	K-AKGVSLLLPTDVVVADK-F	0000000000000000000	260	276	863.016	2	5.37418	0.000326807	38
AK070041	Os02g0169300	Similar to Phosphoglycerate kinase, cytosolic (EC 2.7.2.3). (Os02t0169300-01)	42223.6	K-AKGVSLLLPTDVVVADKFAADAESK-T	000000000000000000000000000	260	284	848.807	3	5.71115	3.24398e-05	38
AK070041	Os02g0169300	Similar to Phosphoglycerate kinase, cytosolic (EC 2.7.2.3). (Os02t0169300-01)	42223.6	K-GVSLLLPTDVVVADK-F	00000000000000000	262	276	763.449	2	4.62375	0.00142541	38
AK070041	Os02g0169300	Similar to Phosphoglycerate kinase, cytosolic (EC 2.7.2.3). (Os02t0169300-01)	42223.6	K-GVSLLLPTDVVVADKFAADAESK-T	0000000000000000000000000	262	284	1173.14	2	4.44704	1.03477e-06	38
AK070041	Os02g0169300	Similar to Phosphoglycerate kinase, cytosolic (EC 2.7.2.3). (Os02t0169300-01)	42223.6	K-TVAASAIPDGWMGLDVGPDAIK-T	000000000000300000000000	285	306	1100.56	2	6.12735	5.28816e-07	38
AK070041	Os02g0169300	Similar to Phosphoglycerate kinase, cytosolic (EC 2.7.2.3). (Os02t0169300-01)	42223.6	K-TVAASAIPDGWMGLDVGPDAIK-T	000000000000000000000000	285	306	1092.56	2	7.19685	0.00266821	38
AK070041	Os02g0169300	Similar to Phosphoglycerate kinase, cytosolic (EC 2.7.2.3). (Os02t0169300-01)	42223.6	K-FAAGTDAIAK-K	000000000000	332	341	482.762	2	6.76835	0.0123535	38
AK070041	Os02g0169300	Similar to Phosphoglycerate kinase, cytosolic (EC 2.7.2.3). (Os02t0169300-01)	42223.6	K-FAAGTDAIAKK-L	0000000000000	332	342	546.808	2	4.37082	0.000177752	38
AK070041	Os02g0169300	Similar to Phosphoglycerate kinase, cytosolic (EC 2.7.2.3). (Os02t0169300-01)	42223.6	K-GATTIIGGGDSVAAVEK-A	0000000000000000000	351	367	773.414	2	5.15701	7.47056e-05	38
AK070041	Os02g0169300	Similar to Phosphoglycerate kinase, cytosolic (EC 2.7.2.3). (Os02t0169300-01)	42223.6	K-AGLADKMSHISTGGGASLELLEGK-T	00000000000000000000000000	368	391	781.411	3	6.71819	5.15207e-06	38
AK070041	Os02g0169300	Similar to Phosphoglycerate kinase, cytosolic (EC 2.7.2.3). (Os02t0169300-01)	42223.6	K-MSHISTGGGASLELLEGK-T	00000000000000000000	374	391	893.959	2	6.05509	9.1719e-09	38
AK070041	Os02g0169300	Similar to Phosphoglycerate kinase, cytosolic (EC 2.7.2.3). (Os02t0169300-01)	42223.6	K-MSHISTGGGASLELLEGK-T	03000000000000000000	374	391	901.958	2	7.12229	4.16742e-05	38
AK070041	Os02g0169300	Similar to Phosphoglycerate kinase, cytosolic (EC 2.7.2.3). (Os02t0169300-01)	42223.6	K-TLPGVLALDEA--	0000000000000	392	402	549.809	2	6.50771	0.00130558	38
AK065409	Os02g0169800	Armadillo-like helical domain containing protein. (Os02t0169800-01)	35331.8	K-ILVSLAPQLIK-G	0000000000000	94	104	597.899	2	7.78476	5.28955e-05	3
AK065409	Os02g0169800	Armadillo-like helical domain containing protein. (Os02t0169800-01)	35331.8	K-ATFEVVQLLK-N	000000000000	178	187	574.343	2	5.12934	3.28809e-05	3
AK065409	Os02g0169800	Armadillo-like helical domain containing protein. (Os02t0169800-01)	35331.8	R-TNIQMIGALSR-S	0000000000000	198	208	602.333	2	5.28695	5.42871e-07	3
AK070107	Os02g0169900	Inositol monophosphatase family protein. (Os02t0169900-01), Inositol monophosphatase family protein. (Os02t0169900-02)	39241	R-AGAEVIMEAVNKPR-N	0000000000000000	90	103	742.904	2	7.34012	0.0252967	1
AK058912	Os02g0170100	Glycine cleavage H-protein family protein. (Os02t0170100-01), Glycine cleavage H-protein family protein. (Os02t0170100-02)	17118.4	K-VSDSGELNSLMDDAK-Y	00000000000000000	132	146	790.862	2	3.87931	1.39687e-07	2
AK058912	Os02g0170100	Glycine cleavage H-protein family protein. (Os02t0170100-01), Glycine cleavage H-protein family protein. (Os02t0170100-02)	17118.4	K-VSDSGELNSLMDDAK-Y	00000000000300000	132	146	798.86	2	3.81606	3.20001e-05	2
AK070032	Os02g0171100	Similar to Glyceraldehyde-3-phosphate dehydrogenase (EC 1.2.1.12) (GAPDH). (Os02t0171100-01), Similar to glyceraldehyde-3-phosphate dehydrogenase, cytosolic. (Os02t0171100-02)	43503.3	R-AIATQAPPAVPQYSSGEK-T	00000000000000000000	58	75	907.97	2	2.95329	0.0154904	10
AK070032	Os02g0171100	Similar to Glyceraldehyde-3-phosphate dehydrogenase (EC 1.2.1.12) (GAPDH). (Os02t0171100-01), Similar to glyceraldehyde-3-phosphate dehydrogenase, cytosolic. (Os02t0171100-02)	43503.3	K-KVVISAPSADAPMFVVGVNEK-S	00000000000003000000000	191	211	725.393	3	5.29276	0.0380684	10
AK070032	Os02g0171100	Similar to Glyceraldehyde-3-phosphate dehydrogenase (EC 1.2.1.12) (GAPDH). (Os02t0171100-01), Similar to glyceraldehyde-3-phosphate dehydrogenase, cytosolic. (Os02t0171100-02)	43503.3	K-VVISAPSADAPMFVVGVNEK-S	0000000000000000000000	192	211	1015.55	2	10.3826	0.0207136	10
AK070032	Os02g0171100	Similar to Glyceraldehyde-3-phosphate dehydrogenase (EC 1.2.1.12) (GAPDH). (Os02t0171100-01), Similar to glyceraldehyde-3-phosphate dehydrogenase, cytosolic. (Os02t0171100-02)	43503.3	K-VVHEEFGIVEGLMTTVHATTATQK-T	00000000000000000000000000	236	259	866.785	3	6.44451	0.00142695	10
AK070032	Os02g0171100	Similar to Glyceraldehyde-3-phosphate dehydrogenase (EC 1.2.1.12) (GAPDH). (Os02t0171100-01), Similar to glyceraldehyde-3-phosphate dehydrogenase, cytosolic. (Os02t0171100-02)	43503.3	R-GAAQNIIPSSTGAAK-A	00000000000000000	274	288	693.378	2	7.50673	0.00182286	10
AK070032	Os02g0171100	Similar to Glyceraldehyde-3-phosphate dehydrogenase (EC 1.2.1.12) (GAPDH). (Os02t0171100-01), Similar to glyceraldehyde-3-phosphate dehydrogenase, cytosolic. (Os02t0171100-02)	43503.3	K-AGIGLSSSFMK-L	0000000000000	372	382	549.289	2	4.80439	1.38318e-06	10
AK070032	Os02g0171100	Similar to Glyceraldehyde-3-phosphate dehydrogenase (EC 1.2.1.12) (GAPDH). (Os02t0171100-01), Similar to glyceraldehyde-3-phosphate dehydrogenase, cytosolic. (Os02t0171100-02)	43503.3	K-AGIGLSSSFMK-L	0000000000300	372	382	557.286	2	4.03652	0.0122667	10
AK070032	Os02g0171100	Similar to Glyceraldehyde-3-phosphate dehydrogenase (EC 1.2.1.12) (GAPDH). (Os02t0171100-01), Similar to glyceraldehyde-3-phosphate dehydrogenase, cytosolic. (Os02t0171100-02)	43503.3	K-LVSWYDNEWGYSNR-V	0000000000000000	383	396	894.909	2	7.05044	0.000446761	10
AK070032	Os02g0171100	Similar to Glyceraldehyde-3-phosphate dehydrogenase (EC 1.2.1.12) (GAPDH). (Os02t0171100-01), Similar to glyceraldehyde-3-phosphate dehydrogenase, cytosolic. (Os02t0171100-02)	43503.3	R-VLDLIAHMALVNAK-H	0000000000000000	397	410	754.442	2	6.49222	3.54968e-06	10
AK070032	Os02g0171100	Similar to Glyceraldehyde-3-phosphate dehydrogenase (EC 1.2.1.12) (GAPDH). (Os02t0171100-01), Similar to glyceraldehyde-3-phosphate dehydrogenase, cytosolic. (Os02t0171100-02)	43503.3	R-VLDLIAHMALVNAK-H	0000000030000000	397	410	762.441	2	8.56263	0.0171155	10
AK060831	Os02g0173900	Similar to Succinate-semialdehyde dehydrogenase (EC 1.2.1.16). (Os02t0173900-01)	24219	R-MANDTNAGLAAYIFTK-S	030000000000000000	140	155	858.924	2	7.94017	1.85146e-06	1
AK067063	Os02g0175400	Similar to Vacuolar H(+)-ATPase subunit A (Fragment). (Os02t0175400-01)	68903.1	K-SGDVYIPR-G	0000000000	114	121	453.74	2	4.41883	0.0145774	9
AK067063	Os02g0175400	Similar to Vacuolar H(+)-ATPase subunit A (Fragment). (Os02t0175400-01)	68903.1	K-LAADTPLLTGQR-V	00000000000000	221	232	628.356	2	3.7049	0.000240496	9
AK067063	Os02g0175400	Similar to Vacuolar H(+)-ATPase subunit A (Fragment). (Os02t0175400-01)	68903.1	R-TTLVANTSNMPVAAR-E	00000000000000000	310	324	773.41	2	4.73423	1.91177e-07	9
AK067063	Os02g0175400	Similar to Vacuolar H(+)-ATPase subunit A (Fragment). (Os02t0175400-01)	68903.1	R-TTLVANTSNMPVAAR-E	00000000003000000	310	324	781.401	2	-3.312	0.000291841	9
AK067063	Os02g0175400	Similar to Vacuolar H(+)-ATPase subunit A (Fragment). (Os02t0175400-01)	68903.1	R-LAEMPADSGYPAYLAAR-L	0000000000000000000	366	382	898.44	2	2.52938	1.24312e-05	9
AK067063	Os02g0175400	Similar to Vacuolar H(+)-ATPase subunit A (Fragment). (Os02t0175400-01)	68903.1	K-DALAESDKITLETAK-L	00000000000000000	500	514	802.927	2	5.91834	3.40523e-05	9
AK067063	Os02g0175400	Similar to Vacuolar H(+)-ATPase subunit A (Fragment). (Os02t0175400-01)	68903.1	R-MGDLFYR-L	030000000	576	582	459.215	2	5.31668	0.00018355	9
AK067063	Os02g0175400	Similar to Vacuolar H(+)-ATPase subunit A (Fragment). (Os02t0175400-01)	68903.1	R-MGDLFYR-L	000000000	576	582	451.218	2	4.5887	0.000386962	9
AK067063	Os02g0175400	Similar to Vacuolar H(+)-ATPase subunit A (Fragment). (Os02t0175400-01)	68903.1	K-LYDDLTAGFR-N	000000000000	605	614	585.795	2	3.50122	3.85306e-06	9
Os02g0176700	Os02g0176700	Similar to autoinhibited calcium ATPase. (Os02t0176700-00)	112981	R-MVTGDNLQTAR-A	0000000000000	669	679	603.301	2	-0.20968	2.31036e-05	1
AK103796	Os02g0180200	Uncharacterised protein family UPF0133 domain containing protein. (Os02t0180200-01)	20354.3	K-AQMVVQVEAVR-V	0000000000000	88	98	615.341	2	6.02755	0.000104577	4
AK103796	Os02g0180200	Uncharacterised protein family UPF0133 domain containing protein. (Os02t0180200-01)	20354.3	K-VTLSGNQQPVR-V	0000000000000	119	129	599.835	2	7.93301	0.0156087	4
AK103796	Os02g0180200	Uncharacterised protein family UPF0133 domain containing protein. (Os02t0180200-01)	20354.3	R-VEITEAAMEVGAEK-L	0000000030000000	130	143	746.869	2	6.68257	0.000102159	4
AK103796	Os02g0180200	Uncharacterised protein family UPF0133 domain containing protein. (Os02t0180200-01)	20354.3	K-LSELVNDAYKDAHQR-S	00000000000000000	144	158	586.967	3	5.07865	0.0486374	4
AK101220	Os02g0180500	Similar to Chorismate mutase CM2 (EC 5.4.99.5) (Chorimate mutase). (Os02t0180500-01)	28770.9	R-NAPAYAAAAAAGGR-S	0000000000000000	35	48	616.321	2	12.947	0.0215986	1
AK121784	Os02g0181800	Similar to Ubiquitin fusion degradation 1-like. (Os02t0181800-01)	36338.1	K-LQPHTTDFLDISNPK-A	00000000000000000	124	138	863.453	2	10.4789	0.00302944	1
011-031-B09	Os02g0181900	Similar to ClpB. (Os02t0181900-01)	21563.4	K-TAIAEGLAQR-I	000000000000	10	19	515.291	2	4.92538	0.00232738	1
Os02g0183900	Os02g0183900	#N/A	39849.5	R-YVAEWEAVVTR-M	0000000000000	128	138	661.844	2	4.94603	4.15603e-05	1
006-102-C09	Os02g0184200	Similar to Vacuolar proton pyrophosphatase. (Os02t0184200-01)	37261.5	R-TDALDAAGNTTAAIGK-G	000000000000000000	120	135	745.381	2	4.05095	0.0262486	3
006-102-C09	Os02g0184200	Similar to Vacuolar proton pyrophosphatase. (Os02t0184200-01)	37261.5	K-KYIEAGASEHAR-T	00000000000000	289	300	666.343	2	6.14549	0.00659168	3
006-102-C09	Os02g0184200	Similar to Vacuolar proton pyrophosphatase. (Os02t0184200-01)	37261.5	K-YIEAGASEHAR-T	0000000000000	290	300	602.294	2	4.35419	0.0377234	3
AK067643	Os02g0186400	Spectrin repeat containing protein. (Os02t0186400-01)	86519.9	K-VTEVEKLK-Q	0000000000	207	214	473.286	2	3.92786	0.0135036	1
AK109387	Os02g0187600	Conserved hypothetical protein. (Os02t0187600-01), Conserved hypothetical protein. (Os02t0187600-02)	27974.2	K-TASEPAKAPPR-A	0000000000000	165	175	562.809	2	4.39492	0.0414257	1
AK071794	Os02g0187800	Cinnamyl alcohol dehydrogenase (EC 1.1.1.195). (Os02t0187800-01), Similar to Cinnamyl alcohol dehydrogenase 1a. (Os02t0187800-02)	39257.8	R-GGVLGLGGVGHMGVK-V	00000000000000000	184	198	669.376	2	6.86535	0.000425543	2
AK071794	Os02g0187800	Cinnamyl alcohol dehydrogenase (EC 1.1.1.195). (Os02t0187800-01), Similar to Cinnamyl alcohol dehydrogenase 1a. (Os02t0187800-02)	39257.8	K-MDYVNQALER-L	000000000000	327	336	619.798	2	4.17233	0.00425375	2
Os02g0190101	Os02g0190101	#N/A	54368.1	R-LRLKWLR-A	000000000	418	424	492.829	2	3.76094	0.030515	1
AK061629	Os02g0192700	Similar to Thioredoxin peroxidase. (Os02t0192700-01), Similar to Thioredoxin peroxidase. (Os02t0192700-02)	23307.1	K-VLNLEEGGAFTTSSAEEMLK-A	0000000000000000000000	204	223	1063.52	2	4.87812	5.942e-12	2
AK061629	Os02g0192700	Similar to Thioredoxin peroxidase. (Os02t0192700-01), Similar to Thioredoxin peroxidase. (Os02t0192700-02)	23307.1	K-VLNLEEGGAFTTSSAEEMLK-A	0000000000000000003000	204	223	1071.52	2	7.21262	4.82558e-07	2
AF302906	Os02g0194100	Similar to Citrate synthase (EC 4.1.3.7). (Os02t0194100-01)	52480.3	R-LPAVASYVYR-R	000000000000	216	225	569.82	2	6.6714	1.21239e-05	5
AF302906	Os02g0194100	Similar to Citrate synthase (EC 4.1.3.7). (Os02t0194100-01)	52480.3	K-SVIGETGSDVTTDQLK-E	000000000000000000	320	335	825.419	2	4.18333	5.15744e-08	5
AF302906	Os02g0194100	Similar to Citrate synthase (EC 4.1.3.7). (Os02t0194100-01)	52480.3	K-LYEVVPPILTELGK-V	0000000000000000	386	399	785.965	2	8.11042	0.0038219	5
AF302906	Os02g0194100	Similar to Citrate synthase (EC 4.1.3.7). (Os02t0194100-01)	52480.3	R-YYTVLFGVSR-S	000000000000	425	434	602.825	2	5.61772	5.95915e-05	5
AF302906	Os02g0194100	Similar to Citrate synthase (EC 4.1.3.7). (Os02t0194100-01)	52480.3	R-SIGIGSQLIWDR-A	00000000000000	435	446	672.872	2	6.49901	5.02875e-06	5
AF302906	Os02g0194100	Similar to Citrate synthase (EC 4.1.3.7). (Os02t0194100-01)	52480.3	R-ALGLPLERPK-S	000000000000	447	456	547.345	2	8.70658	0.0379586	5
AK070521	Os02g0196800	Similar to Fumarylacetoacetase (Fragment). (Os02t0196800-01), Similar to Fumarylacetoacetase. (Os02t0196800-02)	47784.9	K-ILSADEPVLR-D	000000000000	101	110	556.822	2	4.42242	7.29451e-05	2
AK070521	Os02g0196800	Similar to Fumarylacetoacetase (Fragment). (Os02t0196800-01), Similar to Fumarylacetoacetase. (Os02t0196800-02)	47784.9	R-ASSVIVSGTDIIRPK-G	00000000000000000	176	190	771.949	2	4.16284	0.000153267	2
AK067974	Os02g0198600	Similar to DNA-damage inducible protein DDI1-like. (Os02t0198600-01), Similar to predicted protein. (Os02t0198600-02)	45902.6	K-ALLEVETSVPLR-Q	00000000000000	28	39	663.889	2	5.34804	1.05935e-05	5
AK067974	Os02g0198600	Similar to DNA-damage inducible protein DDI1-like. (Os02t0198600-01), Similar to predicted protein. (Os02t0198600-02)	45902.6	R-LNPDGSAVDPQAFR-Q	0000000000000000	85	98	743.872	2	5.87534	0.000949673	5
AK067974	Os02g0198600	Similar to DNA-damage inducible protein DDI1-like. (Os02t0198600-01), Similar to predicted protein. (Os02t0198600-02)	45902.6	R-YRGVAIGVGQSEILGR-I	000000000000000000	240	255	558.985	3	6.83203	0.0142115	5
AK067974	Os02g0198600	Similar to DNA-damage inducible protein DDI1-like. (Os02t0198600-01), Similar to predicted protein. (Os02t0198600-02)	45902.6	R-GVAIGVGQSEILGR-I	0000000000000000	242	255	678.39	2	5.89779	3.11373e-07	5
AK067974	Os02g0198600	Similar to DNA-damage inducible protein DDI1-like. (Os02t0198600-01), Similar to predicted protein. (Os02t0198600-02)	45902.6	K-LASLSQGAAGESSTAR-E	000000000000000000	333	348	753.381	2	-0.0630491	2.49479e-09	5
AK070231	Os02g0198900	Similar to Ribosomal protein L7/L12. (Os02t0198900-01)	20850.2	K-QSLTKEEAEAIIEK-I	0000000000000000	169	182	794.929	2	4.55261	0.0142039	1
AK099357	Os02g0199900	Similar to 26S proteasome regulatory complex subunit p42D. (Os02t0199900-01), Similar to 26S protease regulatory subunit S10B. (Os02t0199900-02), Similar to 26S protease regulatory subunit S10B. (Os02t0199900-03)	44842.4	K-DFTKTEDDLK-S	000000000000	46	55	606.296	2	4.33864	0.00690233	8
AK099357	Os02g0199900	Similar to 26S proteasome regulatory complex subunit p42D. (Os02t0199900-01), Similar to 26S protease regulatory subunit S10B. (Os02t0199900-02), Similar to 26S protease regulatory subunit S10B. (Os02t0199900-03)	44842.4	K-GVLLYGPPGTGK-T	00000000000000	176	187	579.833	2	6.44841	0.000251104	8
AK099357	Os02g0199900	Similar to 26S proteasome regulatory complex subunit p42D. (Os02t0199900-01), Similar to 26S protease regulatory subunit S10B. (Os02t0199900-02), Similar to 26S protease regulatory subunit S10B. (Os02t0199900-03)	44842.4	R-AIASNIDANFLK-I	00000000000000	193	204	638.852	2	5.60537	3.59206e-07	8
AK099357	Os02g0199900	Similar to 26S proteasome regulatory complex subunit p42D. (Os02t0199900-01), Similar to 26S protease regulatory subunit S10B. (Os02t0199900-02), Similar to 26S protease regulatory subunit S10B. (Os02t0199900-03)	44842.4	K-IVSSAIIDKYIGESAR-L	000000000000000000	205	220	861.481	2	7.21722	1.0101e-06	8
AK099357	Os02g0199900	Similar to 26S proteasome regulatory complex subunit p42D. (Os02t0199900-01), Similar to 26S protease regulatory subunit S10B. (Os02t0199900-02), Similar to 26S protease regulatory subunit S10B. (Os02t0199900-03)	44842.4	K-HGEIDYEAVVK-L	0000000000000	330	340	630.32	2	5.13549	7.87099e-07	8
AK099357	Os02g0199900	Similar to 26S proteasome regulatory complex subunit p42D. (Os02t0199900-01), Similar to 26S protease regulatory subunit S10B. (Os02t0199900-02), Similar to 26S protease regulatory subunit S10B. (Os02t0199900-03)	44842.4	K-LAEGFNGADLR-N	0000000000000	341	351	581.794	2	-3.43077	1.08302e-05	8
AK099357	Os02g0199900	Similar to 26S proteasome regulatory complex subunit p42D. (Os02t0199900-01), Similar to 26S protease regulatory subunit S10B. (Os02t0199900-02), Similar to 26S protease regulatory subunit S10B. (Os02t0199900-03)	44842.4	K-KLESSAHYSADFGKE--	00000000000000000	386	400	834.905	2	10.1958	0.0331337	8
AK062327	Os02g0202500	Conserved hypothetical protein. (Os02t0202500-01)	7545.83	K-IMTSTVDVKDDSR-S	003000000000000	14	26	741.864	2	6.92984	0.0260925	2
AK062327	Os02g0202500	Conserved hypothetical protein. (Os02t0202500-01)	7545.83	K-FDELMAAAAEER-E	00000000000000	45	56	676.815	2	5.40399	2.19923e-05	2
AK072940	Os02g0203700	Similar to Testis expressed sequence 13A protein. (Os02t0203700-01), Similar to Testis expressed sequence 13A protein. (Os02t0203700-02)	18343.1	R-GSGGGGDYANFGGR-G	0000000000000000	37	50	636.279	2	7.75447	0.00223591	2
AK072940	Os02g0203700	Similar to Testis expressed sequence 13A protein. (Os02t0203700-01), Similar to Testis expressed sequence 13A protein. (Os02t0203700-02)	18343.1	R-GYGFGSGAVR-A	000000000000	115	124	485.743	2	5.76951	0.000831091	2
AK102286	Os02g0205300	Similar to TAT-binding protein homolog (Fragment). (Os02t0205300-01)	47334.8	K-GVLLYGPPGTGK-T	00000000000000	202	213	579.833	2	6.44841	0.000251104	2
AK102286	Os02g0205300	Similar to TAT-binding protein homolog (Fragment). (Os02t0205300-01)	47334.8	R-MESGTGNGDSEVQR-T	0000000000000000	276	289	733.815	2	3.82385	0.0187855	2
AK101434	Os02g0205400	WD40 repeat, region domain containing protein. (Os02t0205400-01)	37888.4	K-ATVTSAEVSQDGR-Y	000000000000000	188	200	660.826	2	4.58441	5.59976e-06	2
AK101434	Os02g0205400	WD40 repeat, region domain containing protein. (Os02t0205400-01)	37888.4	K-LKVNTVSDAAR-K	0000000000000	317	327	587.336	2	5.62455	0.00233689	2
AK099955	Os02g0209100	Similar to Coatomer beta' subunit (Beta'-coat protein) (Beta'-COP) (p102). (Os02t0209100-01)	70227.9	K-HNEIQTVNIK-T	000000000000	30	39	598.325	2	-0.366022	0.00065099	1
AK058267	Os02g0217500	Pre-mRNA cleavage complex II Clp1 family protein. (Os02t0217500-01)	47073.6	R-AAAAQGALPESSQGPR-V	000000000000000000	108	123	755.889	2	6.1173	0.0129121	2
AK058267	Os02g0217500	Pre-mRNA cleavage complex II Clp1 family protein. (Os02t0217500-01)	47073.6	K-SALPIGAEPVADPTR-L	00000000000000000	346	360	747.405	2	5.23411	0.0171124	2
AK066996	Os02g0218200	Peptidase M1, membrane alanine aminopeptidase family protein. (Os02t0218200-01), Similar to APM1 (AMINOPEPTIDASE M1). (Os02t0218200-02)	99030.3	M-AAAEQSAEQFRGQAR-L	10000000000000000	2	16	831.407	2	4.56215	0.0133597	14
AK066996	Os02g0218200	Peptidase M1, membrane alanine aminopeptidase family protein. (Os02t0218200-01), Similar to APM1 (AMINOPEPTIDASE M1). (Os02t0218200-02)	99030.3	R-FNEVLPVGEGTLVIAFK-G	0000000000000000000	99	115	917.021	2	10.3902	0.0346233	14
AK066996	Os02g0218200	Peptidase M1, membrane alanine aminopeptidase family protein. (Os02t0218200-01), Similar to APM1 (AMINOPEPTIDASE M1). (Os02t0218200-02)	99030.3	R-SVYELNGEKK-N	000000000000	128	137	583.807	2	1.88247	0.000463463	14
AK066996	Os02g0218200	Peptidase M1, membrane alanine aminopeptidase family protein. (Os02t0218200-01), Similar to APM1 (AMINOPEPTIDASE M1). (Os02t0218200-02)	99030.3	R-ETALLFDEKHSAAANK-Q	000000000000000000	290	305	582.303	3	4.88405	0.0262073	14
AK066996	Os02g0218200	Peptidase M1, membrane alanine aminopeptidase family protein. (Os02t0218200-01), Similar to APM1 (AMINOPEPTIDASE M1). (Os02t0218200-02)	99030.3	R-MLQSYLGAETFQK-S	030000000000000	408	420	766.381	2	5.60622	0.000101588	14
AK066996	Os02g0218200	Peptidase M1, membrane alanine aminopeptidase family protein. (Os02t0218200-01), Similar to APM1 (AMINOPEPTIDASE M1). (Os02t0218200-02)	99030.3	K-TEDLWAALEEGSGEPVK-T	0000000000000000000	436	452	915.943	2	1.31395	6.38331e-05	14
AK066996	Os02g0218200	Peptidase M1, membrane alanine aminopeptidase family protein. (Os02t0218200-01), Similar to APM1 (AMINOPEPTIDASE M1). (Os02t0218200-02)	99030.3	R-VSYDEELASR-L	000000000000	548	557	584.783	2	8.54335	0.000901854	14
AK066996	Os02g0218200	Peptidase M1, membrane alanine aminopeptidase family protein. (Os02t0218200-01), Similar to APM1 (AMINOPEPTIDASE M1). (Os02t0218200-02)	99030.3	K-SGEGHLDALLR-G	0000000000000	655	665	584.314	2	7.18621	0.00165879	14
AK066996	Os02g0218200	Peptidase M1, membrane alanine aminopeptidase family protein. (Os02t0218200-01), Similar to APM1 (AMINOPEPTIDASE M1). (Os02t0218200-02)	99030.3	R-KAAYVALMQTVNK-S	000000000000000	706	718	718.902	2	3.17011	0.00730979	14
AK066996	Os02g0218200	Peptidase M1, membrane alanine aminopeptidase family protein. (Os02t0218200-01), Similar to APM1 (AMINOPEPTIDASE M1). (Os02t0218200-02)	99030.3	K-AAYVALMQTVNK-S	00000000000000	707	718	654.855	2	4.13297	7.0291e-05	14
AK066996	Os02g0218200	Peptidase M1, membrane alanine aminopeptidase family protein. (Os02t0218200-01), Similar to APM1 (AMINOPEPTIDASE M1). (Os02t0218200-02)	99030.3	K-IYKETDLSQEK-V	0000000000000	730	740	677.352	2	4.69549	0.00870292	14
AK066996	Os02g0218200	Peptidase M1, membrane alanine aminopeptidase family protein. (Os02t0218200-01), Similar to APM1 (AMINOPEPTIDASE M1). (Os02t0218200-02)	99030.3	K-IYKETDLSQEKVR-I	000000000000000	730	742	804.937	2	4.65627	0.00607738	14
AK066996	Os02g0218200	Peptidase M1, membrane alanine aminopeptidase family protein. (Os02t0218200-01), Similar to APM1 (AMINOPEPTIDASE M1). (Os02t0218200-02)	99030.3	R-AEANLGNVLK-E	000000000000	863	872	514.793	2	5.64401	0.0417032	14
AK061944	Os02g0220600	Similar to Elongation factor 1-gamma. (Os02t0220600-01), Elongation factor 1-gamma (EF-1-gamma) (eEF-1B gamma). (Os02t0220600-02)	47732.2	M-ALVLHTFDGNK-N	1000000000000	2	12	628.839	2	6.12716	0.0040674	15
AK061944	Os02g0220600	Similar to Elongation factor 1-gamma. (Os02t0220600-01), Elongation factor 1-gamma (EF-1-gamma) (eEF-1B gamma). (Os02t0220600-02)	47732.2	M-ALVLHTFDGNKNAFK-A	10000000000000000	2	16	858.961	2	4.9816	0.000741741	15
AK061944	Os02g0220600	Similar to Elongation factor 1-gamma. (Os02t0220600-01), Elongation factor 1-gamma (EF-1-gamma) (eEF-1B gamma). (Os02t0220600-02)	47732.2	K-ALIAAEYSGVK-V	0000000000000	17	27	561.316	2	4.32466	5.56173e-07	15
AK061944	Os02g0220600	Similar to Elongation factor 1-gamma. (Os02t0220600-01), Elongation factor 1-gamma (EF-1-gamma) (eEF-1B gamma). (Os02t0220600-02)	47732.2	K-ALIAAEYSGVKVELAK-N	000000000000000000	17	32	831.482	2	6.15888	0.0448979	15
AK061944	Os02g0220600	Similar to Elongation factor 1-gamma. (Os02t0220600-01), Elongation factor 1-gamma (EF-1-gamma) (eEF-1B gamma). (Os02t0220600-02)	47732.2	K-NFQMGVSNK-T	00000000000	33	41	512.752	2	7.67331	0.00400974	15
AK061944	Os02g0220600	Similar to Elongation factor 1-gamma. (Os02t0220600-01), Elongation factor 1-gamma (EF-1-gamma) (eEF-1B gamma). (Os02t0220600-02)	47732.2	K-VPILETPDGPVFESNAIAR-Y	000000000000000000000	54	72	1013.04	2	5.8349	8.66182e-05	15
AK061944	Os02g0220600	Similar to Elongation factor 1-gamma. (Os02t0220600-01), Elongation factor 1-gamma (EF-1-gamma) (eEF-1B gamma). (Os02t0220600-02)	47732.2	R-LGFAPYVAVSEEAAIAALK-R	000000000000000000000	117	135	960.537	2	9.79296	0.0207187	15
AK061944	Os02g0220600	Similar to Elongation factor 1-gamma. (Os02t0220600-01), Elongation factor 1-gamma (EF-1-gamma) (eEF-1B gamma). (Os02t0220600-02)	47732.2	K-NFTSEFPHVER-Y	0000000000000	178	188	681.833	2	11.4793	0.0051775	15
AK061944	Os02g0220600	Similar to Elongation factor 1-gamma. (Os02t0220600-01), Elongation factor 1-gamma (EF-1-gamma) (eEF-1B gamma). (Os02t0220600-02)	47732.2	R-YFWTMVNQPNFK-K	00000000000000	189	200	787.882	2	7.34754	0.00134425	15
AK061944	Os02g0220600	Similar to Elongation factor 1-gamma. (Os02t0220600-01), Elongation factor 1-gamma (EF-1-gamma) (eEF-1B gamma). (Os02t0220600-02)	47732.2	K-AAEKPEEEEEAPKPKPK-N	0000000000000000000	243	259	636.333	3	4.1802	0.0034704	15
AK061944	Os02g0220600	Similar to Elongation factor 1-gamma. (Os02t0220600-01), Elongation factor 1-gamma (EF-1-gamma) (eEF-1B gamma). (Os02t0220600-02)	47732.2	K-NPLDLLPPSK-M	000000000000	260	269	547.319	2	5.80922	0.00199243	15
AK061944	Os02g0220600	Similar to Elongation factor 1-gamma. (Os02t0220600-01), Elongation factor 1-gamma (EF-1-gamma) (eEF-1B gamma). (Os02t0220600-02)	47732.2	K-MLVIGSEPPFK-V	0000000000000	344	354	609.336	2	4.39413	0.000114112	15
AK061944	Os02g0220600	Similar to Elongation factor 1-gamma. (Os02t0220600-01), Elongation factor 1-gamma (EF-1-gamma) (eEF-1B gamma). (Os02t0220600-02)	47732.2	K-MLVIGSEPPFK-V	0300000000000	344	354	617.334	2	4.69519	0.00505394	15
AK061944	Os02g0220600	Similar to Elongation factor 1-gamma. (Os02t0220600-01), Elongation factor 1-gamma (EF-1-gamma) (eEF-1B gamma). (Os02t0220600-02)	47732.2	K-VDISDEAQKER-V	0000000000000	385	395	645.324	2	6.10778	4.98343e-05	15
AK100904	Os02g0221500	Nucleotide-binding, alpha-beta plait domain containing protein. (Os02t0221500-01)	40240.6	K-VLEDEHVIDGR-T	0000000000000	123	133	641.331	2	8.56812	0.000655088	1
AK120755	Os02g0232400	Similar to Citrate synthase, glyoxysomal precursor (EC 2.3.3.1) (GCS). (Os02t0232400-01), Similar to Citrate synthase. (Os02t0232400-02)	59160.8	K-IYDPGYLNTAPVR-S	000000000000000	122	134	739.891	2	7.95522	0.0027951	1
AK070679	Os02g0234800	Similar to U2 small nuclear ribonucleoprotein A' (U2 snRNP-A'). (Os02t0234800-01)	31979.7	R-LGTLLVNNNR-I	000000000000	66	75	557.325	2	5.40079	0.000537787	6
AK070679	Os02g0234800	Similar to U2 small nuclear ribonucleoprotein A' (U2 snRNP-A'). (Os02t0234800-01)	31979.7	R-LTNLAEIDPLASLPK-L	00000000000000000	100	114	797.957	2	0.88476	0.000823769	6
AK070679	Os02g0234800	Similar to U2 small nuclear ribonucleoprotein A' (U2 snRNP-A'). (Os02t0234800-01)	31979.7	K-LQFLSLLDNTVTK-Q	000000000000000	115	127	746.43	2	7.0375	0.00122412	6
AK070679	Os02g0234800	Similar to U2 small nuclear ribonucleoprotein A' (U2 snRNP-A'). (Os02t0234800-01)	31979.7	K-TFTPGQVVDAQDTTMEEQGPK-V	00000000000000000000000	178	198	1140.04	2	6.72523	0.00024048	6
AK070679	Os02g0234800	Similar to U2 small nuclear ribonucleoprotein A' (U2 snRNP-A'). (Os02t0234800-01)	31979.7	K-AAIVNSQTLEEVAR-L	0000000000000000	212	225	750.909	2	5.57058	3.59683e-07	6
AK070679	Os02g0234800	Similar to U2 small nuclear ribonucleoprotein A' (U2 snRNP-A'). (Os02t0234800-01)	31979.7	K-KQNEESTPIEED--	00000000000000	273	284	709.82	2	2.56262	0.0357938	6
AK120417	Os02g0235600	Similar to 60S ribosomal protein L11-2 (L16). Splice isoform 2. (Os02t0235600-01)	21036	K-LVLNISVGESGDR-L	000000000000000	19	31	679.871	2	6.05188	5.60127e-08	9
AK120417	Os02g0235600	Similar to 60S ribosomal protein L11-2 (L16). Splice isoform 2. (Os02t0235600-01)	21036	K-LVLNISVGESGDRLTR-A	000000000000000000	19	34	576.995	3	5.34609	7.59194e-05	9
AK120417	Os02g0235600	Similar to 60S ribosomal protein L11-2 (L16). Splice isoform 2. (Os02t0235600-01)	21036	K-VLEQLSGQTPVFSK-A	0000000000000000	38	51	766.929	2	12.7737	0.000530572	9
AK120417	Os02g0235600	Similar to 60S ribosomal protein L11-2 (L16). Splice isoform 2. (Os02t0235600-01)	21036	K-IACYVTVRGEK-A	0000000000000	67	77	655.355	2	7.36929	0.0188797	9
AK120417	Os02g0235600	Similar to 60S ribosomal protein L11-2 (L16). Splice isoform 2. (Os02t0235600-01)	21036	R-GEKAMQLLESGLK-V	000000000000000	75	87	702.385	2	5.15814	0.000865819	9
AK120417	Os02g0235600	Similar to 60S ribosomal protein L11-2 (L16). Splice isoform 2. (Os02t0235600-01)	21036	K-AMQLLESGLK-V	000000000000	78	87	545.307	2	8.83631	4.45089e-06	9
AK120417	Os02g0235600	Similar to 60S ribosomal protein L11-2 (L16). Splice isoform 2. (Os02t0235600-01)	21036	K-AMQLLESGLK-V	003000000000	78	87	553.303	2	6.45125	0.000555213	9
AK120417	Os02g0235600	Similar to 60S ribosomal protein L11-2 (L16). Splice isoform 2. (Os02t0235600-01)	21036	K-VKEYELLR-R	0000000000	88	95	525.306	2	5.6805	0.00559741	9
AK120417	Os02g0235600	Similar to 60S ribosomal protein L11-2 (L16). Splice isoform 2. (Os02t0235600-01)	21036	K-YDPSTGIYGMDFYVVLER-A	00000000000000000000	118	135	1063.01	2	7.23983	0.00291011	9
AK120417	Os02g0235600	Similar to 60S ribosomal protein L11-2 (L16). Splice isoform 2. (Os02t0235600-01)	21036	K-YEGVILNK-A	0000000000	169	176	468.266	2	4.96299	7.88913e-05	9
AK070560	Os02g0236000	Similar to Aspartate aminotransferase (EC 2.6.1.1) (Fragment). (Os02t0236000-01)	48574.3	R-TFTYYHPESR-G	000000000000	178	187	650.805	2	6.06479	9.26717e-05	1
AK068881	Os02g0238500	Scramblase family protein. (Os02t0238500-01)	23327.9	R-IYDLYLGNR-Q	00000000000	91	99	563.801	2	5.45848	0.0288886	3
AK068881	Os02g0238500	Scramblase family protein. (Os02t0238500-01)	23327.9	R-GIGFELFTDAGQYAIR-F	000000000000000000	133	148	879.454	2	8.51381	2.49375e-06	3
AK068881	Os02g0238500	Scramblase family protein. (Os02t0238500-01)	23327.9	K-FGLASDIDELHVVR-Q	0000000000000000	158	171	524.282	3	6.20086	0.0241016	3
AK065425	Os02g0244700	Similar to Phosphoenolpyruvate carboxylase 1 (EC 4.1.1.31) (PEPCase 1) (CP21). (Os02t0244700-01), Similar to Phosphoenolpyruvate carboxylase 1 (EC 4.1.1.31) (PEPCase 1) (CP21). (Os02t0244700-02), Similar to Phosphoenolpyruvate carboxylase. (Os02t0244700-03), Similar to Phosphoenolpyruvate carboxylase. (Os02t0244700-04)	110716	R-KPSGGIESLR-A	000000000000	762	771	522.298	2	4.11738	0.00588077	1
AK111709	Os02g0245100	Similar to Peroxisomal targeting signal type 2 receptor. (Os02t0245100-01), Similar to PEX7 (peroxin 7). (Os02t0245100-02), Similar to Peroxisomal targeting signal type 2 receptor. (Os02t0245100-03)	35775.8	R-APLAQLAGHGYAVK-R	0000000000000000	232	245	698.393	2	3.44648	0.00329741	1
AK102024	Os02g0247200	Similar to T-complex protein 1, gamma subunit (TCP-1-gamma) (CCT-gamma) (Matricin) (mTRiC-P5). (Os02t0247200-01)	61469	M-ALHAPVLVLK-D	100000000000	2	11	551.857	2	7.09786	0.00135358	2
AK102024	Os02g0247200	Similar to T-complex protein 1, gamma subunit (TCP-1-gamma) (CCT-gamma) (Matricin) (mTRiC-P5). (Os02t0247200-01)	61469	R-IDDIVSGIK-K	00000000000	521	529	480.277	2	6.51707	0.000250696	2
AK121248	Os02g0261100	Ubiquitin-conjugating enzyme OsUBC5b. (Os02t0261100-01)	16648.5	K-EQWSPALTISK-V	0000000000000	91	101	630.338	2	4.0748	0.0358907	1
AK060027	Os02g0265400	Similar to Vacuolar protein sorting 29 (Vesicle protein sorting 29) (hVPS29) (PEP11). Splice isoform 2. (Os02t0265400-01)	21150.9	M-VLVLALGDLHVPHR-A	0000000000000000	2	15	513.65	3	11.5942	0.00910359	2
AK060027	Os02g0265400	Similar to Vacuolar protein sorting 29 (Vesicle protein sorting 29) (hVPS29) (PEP11). Splice isoform 2. (Os02t0265400-01)	21150.9	R-GEYDEDARYPETK-T	000000000000000	62	74	786.846	2	2.61678	0.0258497	2
AK073294	Os02g0274100	Similar to Peroxisomal fatty acid beta-oxidation multifunctional protein (MFP). (Os02t0274100-01), Similar to Peroxisomal fatty acid beta-oxidation multifunctional protein. (Os02t0274100-02)	79191.7	K-YAEAMDRDDVK-A	0000000000000	41	51	656.798	2	4.38186	0.0121594	9
AK073294	Os02g0274100	Similar to Peroxisomal fatty acid beta-oxidation multifunctional protein (MFP). (Os02t0274100-01), Similar to Peroxisomal fatty acid beta-oxidation multifunctional protein. (Os02t0274100-02)	79191.7	R-LWALEIANYR-K	000000000000	196	205	624.844	2	6.36478	0.000813626	9
AK073294	Os02g0274100	Similar to Peroxisomal fatty acid beta-oxidation multifunctional protein (MFP). (Os02t0274100-01), Similar to Peroxisomal fatty acid beta-oxidation multifunctional protein. (Os02t0274100-02)	79191.7	K-VFKELVLSPTSK-A	00000000000000	270	281	674.402	2	5.72582	7.40782e-05	9
AK073294	Os02g0274100	Similar to Peroxisomal fatty acid beta-oxidation multifunctional protein (MFP). (Os02t0274100-01), Similar to Peroxisomal fatty acid beta-oxidation multifunctional protein. (Os02t0274100-02)	79191.7	K-ALVHAFFAQR-L	000000000000	282	291	580.326	2	6.13535	0.00334305	9
AK073294	Os02g0274100	Similar to Peroxisomal fatty acid beta-oxidation multifunctional protein (MFP). (Os02t0274100-01), Similar to Peroxisomal fatty acid beta-oxidation multifunctional protein. (Os02t0274100-02)	79191.7	K-VPGVTDVQLKPR-K	00000000000000	296	307	654.889	2	5.63378	2.88949e-05	9
AK073294	Os02g0274100	Similar to Peroxisomal fatty acid beta-oxidation multifunctional protein (MFP). (Os02t0274100-01), Similar to Peroxisomal fatty acid beta-oxidation multifunctional protein. (Os02t0274100-02)	79191.7	K-MIAANLEGLVK-R	0000000000000	351	361	579.832	2	0.854558	0.037223	9
AK073294	Os02g0274100	Similar to Peroxisomal fatty acid beta-oxidation multifunctional protein (MFP). (Os02t0274100-01), Similar to Peroxisomal fatty acid beta-oxidation multifunctional protein. (Os02t0274100-02)	79191.7	K-TSPQAILDLITVGK-M	0000000000000000	465	478	728.431	2	9.2157	0.00261352	9
AK073294	Os02g0274100	Similar to Peroxisomal fatty acid beta-oxidation multifunctional protein (MFP). (Os02t0274100-01), Similar to Peroxisomal fatty acid beta-oxidation multifunctional protein. (Os02t0274100-02)	79191.7	K-DIYAAAFGTR-N	000000000000	549	558	542.777	2	5.05824	7.1052e-06	9
AK073294	Os02g0274100	Similar to Peroxisomal fatty acid beta-oxidation multifunctional protein (MFP). (Os02t0274100-01), Similar to Peroxisomal fatty acid beta-oxidation multifunctional protein. (Os02t0274100-02)	79191.7	R-NLDSNLVDLMVQNGR-Q	00000000000000000	559	573	844.429	2	4.48883	2.33084e-07	9
AK073294	Os02g0274100	Similar to Peroxisomal fatty acid beta-oxidation multifunctional protein (MFP). (Os02t0274100-01), Similar to Peroxisomal fatty acid beta-oxidation multifunctional protein. (Os02t0274100-02)	79191.7	R-ASDLDIASILGMGFPK-F	000000000000300000	648	663	825.932	2	9.1763	0.0018855	9
AK121593	Os02g0284600	Similar to 60S ribosomal protein L27. (Os02t0284600-01)	15781.8	M-VKFLKPGK-A	0000000000	2	9	458.806	2	7.04764	0.00906742	2
AK121593	Os02g0284600	Similar to 60S ribosomal protein L27. (Os02t0284600-01)	15781.8	K-DVASGGPDALATR-D	000000000000000	93	105	615.313	2	4.79919	1.75975e-05	2
AK069347	Os02g0300700	Similar to Eukaryotic translation initiation factor 1A (EIF-1A) (EIF-4C). (Os02t0300700-01)	16393.2	R-DYQDDKADVILK-Y	00000000000000	83	94	711.863	2	4.98411	0.001585	1
AK061254	Os02g0317400	Longin-like domain containing protein. (Os02t0317400-01), Similar to Coatomer subunit zeta-2. (Os02t0317400-02)	19997.3	K-NILLLDSEGK-R	000000000000	14	23	551.314	2	5.80068	0.00135228	2
AK061254	Os02g0317400	Longin-like domain containing protein. (Os02t0317400-01), Similar to Coatomer subunit zeta-2. (Os02t0317400-02)	19997.3	K-YFSDDWSSNASK-L	00000000000000	29	40	703.802	2	7.96744	0.00502535	2
AK070852	Os02g0321800	B-cell receptor-associated 31-like family protein. (Os02t0321800-01), Similar to B-cell receptor-associated protein 31-like containing protein. (Os02t0321800-02)	25042.6	K-LQVQEKTEEVHVAEDK-A	000000000000000000	171	186	627.994	3	6.51811	0.00360117	3
AK070852	Os02g0321800	B-cell receptor-associated 31-like family protein. (Os02t0321800-01), Similar to B-cell receptor-associated protein 31-like containing protein. (Os02t0321800-02)	25042.6	K-TEEVHVAEDK-A	000000000000	177	186	578.781	2	5.3535	0.000472716	3
AK070852	Os02g0321800	B-cell receptor-associated 31-like family protein. (Os02t0321800-01), Similar to B-cell receptor-associated protein 31-like containing protein. (Os02t0321800-02)	25042.6	R-LLEDNQHLR-E	00000000000	204	212	569.308	2	7.01905	0.0442259	3
AK062103	Os02g0321900	Similar to Ribosomal protein L1. (Os02t0321900-01), Similar to 60S ribosomal protein L10a-1. (Os02t0321900-02)	24908.4	K-KYHAFLASEAIIK-Q	000000000000000	105	117	497.62	3	6.63692	0.00212071	5
AK062103	Os02g0321900	Similar to Ribosomal protein L1. (Os02t0321900-01), Similar to 60S ribosomal protein L10a-1. (Os02t0321900-02)	24908.4	K-YHAFLASEAIIK-Q	00000000000000	106	117	681.878	2	5.94607	0.000137817	5
AK062103	Os02g0321900	Similar to Ribosomal protein L1. (Os02t0321900-01), Similar to 60S ribosomal protein L10a-1. (Os02t0321900-02)	24908.4	K-AGKFPTLVTHQESLESK-V	0000000000000000000	130	146	936.501	2	4.8804	0.000276215	5
AK062103	Os02g0321900	Similar to Ribosomal protein L1. (Os02t0321900-01), Similar to 60S ribosomal protein L10a-1. (Os02t0321900-02)	24908.4	K-FPTLVTHQESLESK-V	0000000000000000	133	146	539.286	3	6.16185	0.0128337	5
Os02g0322400	Os02g0322400	Similar to NPKL2 (Fragment). (Os02t0322400-00)	45200	R-GHDDDDDDDDHGVSSSPCSWR-R	00000000000000000000000	386	406	796.622	3	-8.13142	0.0402689	1
AK071476	Os02g0325100	Similar to 26S protease regulatory subunit 6B (MIP224) (MB67 interacting protein) (TAT-binding protein-7) (TBP-7). (Os02t0325100-01), Similar to 26S proteasome regulatory particle triple-A ATPase subunit3 (Fragment). (Os02t0325100-02)	46639.1	R-ELLKPSASVALHR-H	000000000000000	123	135	474.281	3	0.420988	0.0262617	5
AK071476	Os02g0325100	Similar to 26S protease regulatory subunit 6B (MIP224) (MB67 interacting protein) (TAT-binding protein-7) (TBP-7). (Os02t0325100-01), Similar to 26S proteasome regulatory particle triple-A ATPase subunit3 (Fragment). (Os02t0325100-02)	46639.1	R-GVLLYGPPGTGK-T	00000000000000	202	213	579.833	2	6.44841	0.000251104	5
AK071476	Os02g0325100	Similar to 26S protease regulatory subunit 6B (MIP224) (MB67 interacting protein) (TAT-binding protein-7) (TBP-7). (Os02t0325100-01), Similar to 26S proteasome regulatory particle triple-A ATPase subunit3 (Fragment). (Os02t0325100-02)	46639.1	K-AVAHHTTAAFIR-V	00000000000000	219	230	647.857	2	3.38732	0.00673539	5
AK071476	Os02g0325100	Similar to 26S protease regulatory subunit 6B (MIP224) (MB67 interacting protein) (TAT-binding protein-7) (TBP-7). (Os02t0325100-01), Similar to 26S proteasome regulatory particle triple-A ATPase subunit3 (Fragment). (Os02t0325100-02)	46639.1	R-FDAQTGADREVQR-I	000000000000000	276	288	746.865	2	5.57598	0.0396392	5
AK071476	Os02g0325100	Similar to 26S protease regulatory subunit 6B (MIP224) (MB67 interacting protein) (TAT-binding protein-7) (TBP-7). (Os02t0325100-01), Similar to 26S proteasome regulatory particle triple-A ATPase subunit3 (Fragment). (Os02t0325100-02)	46639.1	K-KPETDFDFYK--	000000000000	410	419	645.313	2	10.1679	0.0378758	5
AK073532	Os02g0327100	Similar to ARL2 G-protein. (Os02t0327100-01)	21103.1	R-LAGASLLVFANK-Q	00000000000000	115	126	602.364	2	9.99561	0.000238318	1
AK067672	Os02g0332200	Similar to T-complex protein 1 delta subunit. (Os02t0332200-01), Similar to T-complex protein 1, delta subunit. (Os02t0332200-02)	58208.9	M-ATAVAASPAQSR-K	10000000000000	2	13	586.309	2	3.28666	0.00747612	12
AK067672	Os02g0332200	Similar to T-complex protein 1 delta subunit. (Os02t0332200-01), Similar to T-complex protein 1, delta subunit. (Os02t0332200-02)	58208.9	R-MSLLQPAAR-M	00000000000	75	83	493.779	2	6.32975	0.000568135	12
AK067672	Os02g0332200	Similar to T-complex protein 1 delta subunit. (Os02t0332200-01), Similar to T-complex protein 1, delta subunit. (Os02t0332200-02)	58208.9	R-MSLLQPAAR-M	03000000000	75	83	501.777	2	7.38575	0.00316319	12
AK067672	Os02g0332200	Similar to T-complex protein 1 delta subunit. (Os02t0332200-01), Similar to T-complex protein 1, delta subunit. (Os02t0332200-02)	58208.9	R-SQDAAAGDGTTTVVVLAGSLLR-R	000000000000000000000000	91	112	1051.57	2	6.9116	0.00477311	12
AK067672	Os02g0332200	Similar to T-complex protein 1 delta subunit. (Os02t0332200-01), Similar to T-complex protein 1, delta subunit. (Os02t0332200-02)	58208.9	R-RAQSLLSAGAHPTAAADALHR-L	00000000000000000000000	113	133	529.288	4	4.10552	3.53359e-06	12
AK067672	Os02g0332200	Similar to T-complex protein 1 delta subunit. (Os02t0332200-01), Similar to T-complex protein 1, delta subunit. (Os02t0332200-02)	58208.9	R-AQSLLSAGAHPTAAADALHR-L	0000000000000000000000	114	133	653.348	3	4.19021	0.000486881	12
AK067672	Os02g0332200	Similar to T-complex protein 1 delta subunit. (Os02t0332200-01), Similar to T-complex protein 1, delta subunit. (Os02t0332200-02)	58208.9	K-KLGGTVDDTELIR-G	000000000000000	207	219	708.892	2	4.59802	0.00238267	12
AK067672	Os02g0332200	Similar to T-complex protein 1 delta subunit. (Os02t0332200-01), Similar to T-complex protein 1, delta subunit. (Os02t0332200-02)	58208.9	K-LGGTVDDTELIR-G	00000000000000	208	219	644.845	2	6.46279	0.00196927	12
AK067672	Os02g0332200	Similar to T-complex protein 1 delta subunit. (Os02t0332200-01), Similar to T-complex protein 1, delta subunit. (Os02t0332200-02)	58208.9	K-ASHAAGGPTRVENAK-I	00000000000000000	227	241	733.382	2	4.53447	0.00178178	12
AK067672	Os02g0332200	Similar to T-complex protein 1 delta subunit. (Os02t0332200-01), Similar to T-complex protein 1, delta subunit. (Os02t0332200-02)	58208.9	R-NYILGMVKK-I	00000000000	277	285	533.313	2	5.13676	0.0369325	12
AK067672	Os02g0332200	Similar to T-complex protein 1 delta subunit. (Os02t0332200-01), Similar to T-complex protein 1, delta subunit. (Os02t0332200-02)	58208.9	R-DAVTDLSLHYLAK-A	000000000000000	303	315	723.389	2	5.49358	1.03833e-05	12
AK067672	Os02g0332200	Similar to T-complex protein 1 delta subunit. (Os02t0332200-01), Similar to T-complex protein 1, delta subunit. (Os02t0332200-02)	58208.9	K-IDDIVTVR--	0000000000	527	534	465.768	2	4.40562	0.00384997	12
AK066001	Os02g0437800	Similar to vacuolar protein-sorting protein 45. (Os02t0437800-01), Similar to Vacuolar protein-sorting protein 45 homolog (AtVPS45). (Os02t0437800-02), Similar to vacuolar protein-sorting protein 45. (Os02t0437800-03)	64937.4	R-LVLLYALR-Y	0000000000	395	402	480.82	2	8.53542	0.00180868	1
AK067100	Os02g0440000	Similar to Diaminopimelate decarboxylase. (Os02t0440000-01), Similar to cDNA clone:J013098O07, full insert sequence. (Os02t0440000-02)	53891.6	R-TPFYLYSKPQVVR-N	000000000000000	97	109	799.447	2	7.56711	0.00906279	4
AK067100	Os02g0440000	Similar to Diaminopimelate decarboxylase. (Os02t0440000-01), Similar to cDNA clone:J013098O07, full insert sequence. (Os02t0440000-02)	53891.6	R-INPDVDPQVHPYVATGNK-T	00000000000000000000	219	236	982.499	2	1.37303	0.0260286	4
AK067100	Os02g0440000	Similar to Diaminopimelate decarboxylase. (Os02t0440000-01), Similar to cDNA clone:J013098O07, full insert sequence. (Os02t0440000-02)	53891.6	R-DAAGLMVNYVDEIR-A	0000000000000000	282	295	783.388	2	3.55124	1.22889e-05	4
AK067100	Os02g0440000	Similar to Diaminopimelate decarboxylase. (Os02t0440000-01), Similar to cDNA clone:J013098O07, full insert sequence. (Os02t0440000-02)	53891.6	R-DLTLIIEPGR-S	000000000000	339	348	563.831	2	7.70532	0.00262678	4
Os02g0456200	Os02g0456200	0	41682.8	R-AHFETETTR-F	00000000000	24	32	546.261	2	3.38208	0.0404424	2
Os02g0456200	Os02g0456200	0	41682.8	R-FTILDAPGHK-S	000000000000	33	42	549.803	2	4.60437	0.0261782	2
J013040J11	Os02g0462900	Prefoldin domain containing protein. (Os02t0462900-01)	7596.94	K-SLLLNEQEQK-L	000000000000	8	17	601.327	2	2.95098	0.0157527	2
J013040J11	Os02g0462900	Prefoldin domain containing protein. (Os02t0462900-01)	7596.94	R-ELLQQDPGLAR-Q	0000000000000	48	58	620.341	2	4.98758	0.0169633	2
AK100199	Os02g0465400	Similar to 7-dehydrocholesterol reductase (EC 1.3.1.21) (7-DHC reductase) (Sterol delta-7-reductase) (Dwarf5 protein). (Os02t0465400-01)	51910.3	K-IVASYQTTNGETK-S	000000000000000	353	365	706.361	2	5.45189	0.00677635	1
AK119795	Os02g0478600	Similar to 40S ribosomal protein S15A. (Os02t0478600-01)	14879.9	M-VRVSVLNDALK-T	0000000000000	2	12	607.371	2	6.89776	2.68833e-05	7
AK119795	Os02g0478600	Similar to 40S ribosomal protein S15A. (Os02t0478600-01)	14879.9	R-FDVGVKEIESWTAR-L	0000000000000000	79	92	818.923	2	3.87094	0.00673367	7
AK119795	Os02g0478600	Similar to 40S ribosomal protein S15A. (Os02t0478600-01)	14879.9	R-QFGYIVLTTSAGIMDHEEAR-R	2000000000000000000000	98	117	1111.04	2	6.58122	1.25116e-05	7
AK119795	Os02g0478600	Similar to 40S ribosomal protein S15A. (Os02t0478600-01)	14879.9	R-QFGYIVLTTSAGIMDHEEAR-R	2000000000000030000000	98	117	1119.04	2	7.82144	8.06359e-05	7
AK119795	Os02g0478600	Similar to 40S ribosomal protein S15A. (Os02t0478600-01)	14879.9	R-QFGYIVLTTSAGIMDHEEAR-R	0000000000000030000000	98	117	752.036	3	5.27634	0.00889815	7
AK099723	Os02g0478700	Ribosomal protein S27. (Os02t0478700-01)	9948.03	M-VLSNDIDLLNPPAELEK-L	0000000000000000000	2	18	940.51	2	5.86278	2.32042e-05	3
AK099723	Os02g0478700	Ribosomal protein S27. (Os02t0478700-01)	9948.03	M-VLSNDIDLLNPPAELEKLK-H	000000000000000000000	2	20	707.736	3	5.71588	5.63642e-05	3
AB110198	Os02g0479300	Similar to RS21-C6 protein. (Os02t0479300-01)	19119.3	R-DWEQFHSPR-N	00000000000	39	47	601.276	2	4.36489	0.00536217	1
AK102402	Os02g0489400	Similar to 40S ribosomal protein S8. (Os02t0489400-01)	24956.3	R-LDTGNYSWGSEAVTR-K	00000000000000000	61	75	828.391	2	5.47748	8.28424e-06	4
AK102402	Os02g0489400	Similar to 40S ribosomal protein S8. (Os02t0489400-01)	24956.3	R-ILDVVYNASNNELVR-T	00000000000000000	79	93	859.957	2	-0.35118	0.0182284	4
AK102402	Os02g0489400	Similar to 40S ribosomal protein S8. (Os02t0489400-01)	24956.3	K-KDAEGQDAEATTEEAKK-S	0000000000000000000	133	149	607.623	3	2.48016	0.00382989	4
AK102402	Os02g0489400	Similar to 40S ribosomal protein S8. (Os02t0489400-01)	24956.3	R-TLDAHIEEQFGSGR-L	0000000000000000	165	178	780.382	2	7.47647	0.000670046	4
AK059542	Os02g0496900	Mitochondrial import receptor, TOM9-2 subunit, plant domain containing protein. (Os02t0496900-01)	9659.17	R-GGGGGEGEGILASFSR-S	000000000000000000	8	23	725.853	2	5.01341	7.47811e-06	1
AY277897	Os02g0497500	Similar to DNA repair protein Rad50. (Os02t0497500-01), Similar to DNA repair protein Rad50. (Os02t0497500-02)	153225	K-HTQLQSDLQK-S	000000000000	994	1003	599.318	2	5.00903	0.00860222	1
AK119704	Os02g0503400	Similar to 60S ribosomal protein L35. (Os02t0503400-01)	14235.4	K-NKAELQAQLK-D	000000000000	13	22	571.833	2	4.48645	0.000224149	2
AK119704	Os02g0503400	Similar to 60S ribosomal protein L35. (Os02t0503400-01)	14235.4	K-SLLPLDLRPK-K	000000000000	77	86	576.364	2	4.87626	0.0214486	2
AK102956	Os02g0504500	PUG domain containing protein. (Os02t0504500-01), Similar to predicted protein. (Os02t0504500-02)	47128.2	R-AFQTLLTYIGNVAK-N	0000000000000000	325	338	769.94	2	10.0852	0.00418606	1
AK101016	Os02g0506500	Similar to ubiquitin-activating enzyme E1 domain-containing protein 1. (Os02t0506500-01), Similar to predicted protein. (Os02t0506500-02), Similar to ubiquitin-activating enzyme E1 domain-containing protein 1. (Os02t0506500-03), NAD(P)-binding domain containing protein. (Os02t0506500-04)	46233.9	K-GFETFLGSLK-A	000000000000	162	171	549.799	2	6.72428	8.05624e-06	1
J100032E10	Os02g0508000	Trimeric LpxA-like domain containing protein. (Os02t0508000-01)	17706.1	R-RIPTGELWAGNPAR-F	0000000000000000	89	102	769.419	2	4.79713	0.00998326	3
J100032E10	Os02g0508000	Trimeric LpxA-like domain containing protein. (Os02t0508000-01)	17706.1	R-IPTGELWAGNPAR-F	000000000000000	90	102	691.368	2	4.56125	1.41421e-05	3
J100032E10	Os02g0508000	Trimeric LpxA-like domain containing protein. (Os02t0508000-01)	17706.1	K-LTNEEIMEIPK-L	0000000000000	107	117	658.846	2	6.18961	0.0173868	3
AK122107	Os02g0510100	Similar to U6 snRNA-associated Sm-like protein LSm6 (Sm protein F). (Os02t0510100-01), Similar to U6 snRNA-associated Sm-like protein LSm6 (Sm protein F). (Os02t0510100-02)	10070.1	R-GNNVLYISTSK-R	0000000000000	79	89	598.324	2	6.77978	0.000287556	1
AB049822	Os02g0510200	Similar to Acetolactate synthase 1, chloroplastic. (Os02t0510200-01)	69775.1	R-SPVITNHLFR-H	000000000000	107	116	592.337	2	7.14796	0.000338235	3
AB049822	Os02g0510200	Similar to Acetolactate synthase 1, chloroplastic. (Os02t0510200-01)	69775.1	R-HEQGEAFAASGYAR-A	0000000000000000	117	130	747.345	2	3.63219	0.0217497	3
AB049822	Os02g0510200	Similar to Acetolactate synthase 1, chloroplastic. (Os02t0510200-01)	69775.1	K-LALQGLNALLQQSTTK-T	000000000000000000	391	406	849.995	2	4.71062	0.0329171	3
Os02g0511900	Os02g0511900	Similar to DNA polymerase. (Os02t0511900-00)	251189	R-RRPSAGGGGGGGGRGGGWRSGSSAAK-D	0000000000000000000000000000	12	37	767.397	3	13.0302	0.0122674	1
AK100313	Os02g0519900	Similar to Elongation factor EF-2 (Fragment). (Os02t0519900-01), Similar to H0613H07.5 protein. (Os02t0519900-02), Similar to H0613H07.5 protein. (Os02t0519900-03), Similar to H0613H07.5 protein. (Os02t0519900-04), Similar to H0613H07.5 protein. (Os02t0519900-05)	95239.2	M-VKFTVEELR-R	00000000000	2	10	560.824	2	4.64406	0.00281182	20
AK100313	Os02g0519900	Similar to Elongation factor EF-2 (Fragment). (Os02t0519900-01), Similar to H0613H07.5 protein. (Os02t0519900-02), Similar to H0613H07.5 protein. (Os02t0519900-03), Similar to H0613H07.5 protein. (Os02t0519900-04), Similar to H0613H07.5 protein. (Os02t0519900-05)	95239.2	M-VKFTVEELRR-I	000000000000	2	11	638.874	2	3.00842	0.0137721	20
AK100313	Os02g0519900	Similar to Elongation factor EF-2 (Fragment). (Os02t0519900-01), Similar to H0613H07.5 protein. (Os02t0519900-02), Similar to H0613H07.5 protein. (Os02t0519900-03), Similar to H0613H07.5 protein. (Os02t0519900-04), Similar to H0613H07.5 protein. (Os02t0519900-05)	95239.2	K-FTVEELRR-I	0000000000	4	11	525.293	2	3.8074	0.029872	20
AK100313	Os02g0519900	Similar to Elongation factor EF-2 (Fragment). (Os02t0519900-01), Similar to H0613H07.5 protein. (Os02t0519900-02), Similar to H0613H07.5 protein. (Os02t0519900-03), Similar to H0613H07.5 protein. (Os02t0519900-04), Similar to H0613H07.5 protein. (Os02t0519900-05)	95239.2	R-NMSVIAHVDHGK-S	00000000000000	21	32	654.333	2	5.06241	0.000741084	20
AK100313	Os02g0519900	Similar to Elongation factor EF-2 (Fragment). (Os02t0519900-01), Similar to H0613H07.5 protein. (Os02t0519900-02), Similar to H0613H07.5 protein. (Os02t0519900-03), Similar to H0613H07.5 protein. (Os02t0519900-04), Similar to H0613H07.5 protein. (Os02t0519900-05)	95239.2	K-STGISLFYEMSDESLK-L	000000000030000000	72	87	911.928	2	4.19934	0.000230093	20
AK100313	Os02g0519900	Similar to Elongation factor EF-2 (Fragment). (Os02t0519900-01), Similar to H0613H07.5 protein. (Os02t0519900-02), Similar to H0613H07.5 protein. (Os02t0519900-03), Similar to H0613H07.5 protein. (Os02t0519900-04), Similar to H0613H07.5 protein. (Os02t0519900-05)	95239.2	K-STGISLFYEMSDESLK-L	000000000000000000	72	87	903.932	2	5.47497	0.00197642	20
AK100313	Os02g0519900	Similar to Elongation factor EF-2 (Fragment). (Os02t0519900-01), Similar to H0613H07.5 protein. (Os02t0519900-02), Similar to H0613H07.5 protein. (Os02t0519900-03), Similar to H0613H07.5 protein. (Os02t0519900-04), Similar to H0613H07.5 protein. (Os02t0519900-05)	95239.2	R-IRPVLTVNKMDR-C	00000000003000	151	162	486.616	3	5.50537	0.0124349	20
AK100313	Os02g0519900	Similar to Elongation factor EF-2 (Fragment). (Os02t0519900-01), Similar to H0613H07.5 protein. (Os02t0519900-02), Similar to H0613H07.5 protein. (Os02t0519900-03), Similar to H0613H07.5 protein. (Os02t0519900-04), Similar to H0613H07.5 protein. (Os02t0519900-05)	95239.2	R-LWGENFFDPATK-K	00000000000000	244	255	712.85	2	5.91429	6.8054e-05	20
AK100313	Os02g0519900	Similar to Elongation factor EF-2 (Fragment). (Os02t0519900-01), Similar to H0613H07.5 protein. (Os02t0519900-02), Similar to H0613H07.5 protein. (Os02t0519900-03), Similar to H0613H07.5 protein. (Os02t0519900-04), Similar to H0613H07.5 protein. (Os02t0519900-05)	95239.2	K-GRFFAFGR-V	0000000000	390	397	479.258	2	4.33065	0.0496	20
AK100313	Os02g0519900	Similar to Elongation factor EF-2 (Fragment). (Os02t0519900-01), Similar to H0613H07.5 protein. (Os02t0519900-02), Similar to H0613H07.5 protein. (Os02t0519900-03), Similar to H0613H07.5 protein. (Os02t0519900-04), Similar to H0613H07.5 protein. (Os02t0519900-05)	95239.2	R-IMGPNYVPGQK-K	0000000000000	411	421	602.318	2	7.71769	0.0175916	20
AK100313	Os02g0519900	Similar to Elongation factor EF-2 (Fragment). (Os02t0519900-01), Similar to H0613H07.5 protein. (Os02t0519900-02), Similar to H0613H07.5 protein. (Os02t0519900-03), Similar to H0613H07.5 protein. (Os02t0519900-04), Similar to H0613H07.5 protein. (Os02t0519900-05)	95239.2	K-ILSEEFGWDKDLAK-K	0000000000000000	619	632	825.926	2	4.725	0.0023671	20
AK100313	Os02g0519900	Similar to Elongation factor EF-2 (Fragment). (Os02t0519900-01), Similar to H0613H07.5 protein. (Os02t0519900-02), Similar to H0613H07.5 protein. (Os02t0519900-03), Similar to H0613H07.5 protein. (Os02t0519900-04), Similar to H0613H07.5 protein. (Os02t0519900-05)	95239.2	K-DSVVAGFQWASK-E	00000000000000	662	673	647.828	2	5.17653	0.00147839	20
AK100313	Os02g0519900	Similar to Elongation factor EF-2 (Fragment). (Os02t0519900-01), Similar to H0613H07.5 protein. (Os02t0519900-02), Similar to H0613H07.5 protein. (Os02t0519900-03), Similar to H0613H07.5 protein. (Os02t0519900-04), Similar to H0613H07.5 protein. (Os02t0519900-05)	95239.2	R-GGGQVIPTAR-R	000000000000	702	711	478.272	2	4.34795	4.499e-05	20
AK100313	Os02g0519900	Similar to Elongation factor EF-2 (Fragment). (Os02t0519900-01), Similar to H0613H07.5 protein. (Os02t0519900-02), Similar to H0613H07.5 protein. (Os02t0519900-03), Similar to H0613H07.5 protein. (Os02t0519900-04), Similar to H0613H07.5 protein. (Os02t0519900-05)	95239.2	R-RVIYASQLTAKPR-L	000000000000000	712	724	501.634	3	5.4143	2.1275e-05	20
AK100313	Os02g0519900	Similar to Elongation factor EF-2 (Fragment). (Os02t0519900-01), Similar to H0613H07.5 protein. (Os02t0519900-02), Similar to H0613H07.5 protein. (Os02t0519900-03), Similar to H0613H07.5 protein. (Os02t0519900-04), Similar to H0613H07.5 protein. (Os02t0519900-05)	95239.2	R-VIYASQLTAKPR-L	00000000000000	713	724	673.896	2	4.48808	8.14697e-05	20
AK100313	Os02g0519900	Similar to Elongation factor EF-2 (Fragment). (Os02t0519900-01), Similar to H0613H07.5 protein. (Os02t0519900-02), Similar to H0613H07.5 protein. (Os02t0519900-03), Similar to H0613H07.5 protein. (Os02t0519900-04), Similar to H0613H07.5 protein. (Os02t0519900-05)	95239.2	R-GHVFEEMQRPGTPLYNIK-A	00000003000000000000	753	770	711.361	3	4.1348	0.0137438	20
AK100313	Os02g0519900	Similar to Elongation factor EF-2 (Fragment). (Os02t0519900-01), Similar to H0613H07.5 protein. (Os02t0519900-02), Similar to H0613H07.5 protein. (Os02t0519900-03), Similar to H0613H07.5 protein. (Os02t0519900-04), Similar to H0613H07.5 protein. (Os02t0519900-05)	95239.2	K-AYLPVIESFGFSSQLR-A	000000000000000000	771	786	907.484	2	6.72354	1.87034e-05	20
AK100313	Os02g0519900	Similar to Elongation factor EF-2 (Fragment). (Os02t0519900-01), Similar to H0613H07.5 protein. (Os02t0519900-02), Similar to H0613H07.5 protein. (Os02t0519900-03), Similar to H0613H07.5 protein. (Os02t0519900-04), Similar to H0613H07.5 protein. (Os02t0519900-05)	95239.2	K-GLKEQMTPLSDFEDKL--	000000000000000000	828	843	925.972	2	8.45652	0.0310561	20
AK102815	Os02g0520800	Similar to Ubiquinol-cytochrome c reductase iron-sulfur subunit, mitochondrial precursor (EC 1.10.2.2) (Rieske iron-sulfur protein) (RISP). (Os02t0520800-01)	30085.6	R-NQDVSLTELPATVSAVK-N	0000000000000000000	69	85	886.481	2	6.77284	0.00525577	4
AK102815	Os02g0520800	Similar to Ubiquinol-cytochrome c reductase iron-sulfur subunit, mitochondrial precursor (EC 1.10.2.2) (Rieske iron-sulfur protein) (RISP). (Os02t0520800-01)	30085.6	R-NQDVSLTELPATVSAVKNPSAK-I	000000000000000000000000	69	90	757.077	3	5.7066	0.00239684	4
AK102815	Os02g0520800	Similar to Ubiquinol-cytochrome c reductase iron-sulfur subunit, mitochondrial precursor (EC 1.10.2.2) (Rieske iron-sulfur protein) (RISP). (Os02t0520800-01)	30085.6	K-IVYDEYNHER-Y	000000000000	91	100	669.313	2	4.52404	1.32248e-05	4
AK102815	Os02g0520800	Similar to Ubiquinol-cytochrome c reductase iron-sulfur subunit, mitochondrial precursor (EC 1.10.2.2) (Rieske iron-sulfur protein) (RISP). (Os02t0520800-01)	30085.6	R-AFAYFVLSGGR-F	0000000000000	110	120	594.317	2	5.04192	0.00140849	4
AK065061	Os02g0523500	Similar to 110 kDa 4SNc-Tudor domain protein (Fragment). (Os02t0523500-01), Similar to RNA binding protein Rp120. (Os02t0523500-02)	108613	K-TNMASVLLEAGLAK-L	0000000000000000	666	679	709.393	2	4.3065	0.00176144	2
AK065061	Os02g0523500	Similar to 110 kDa 4SNc-Tudor domain protein (Fragment). (Os02t0523500-01), Similar to RNA binding protein Rp120. (Os02t0523500-02)	108613	K-VVVTEVLGGGK-F	0000000000000	734	744	529.318	2	3.77183	0.039431	2
AY166599	Os02g0526400	Similar to ATP-dependent Clp protease ATP-binding subunit. (Os02t0526400-01)	102815	K-AIDLIDEAGSR-A	0000000000000	498	508	580.303	2	3.10614	6.12857e-05	1
D16201	Os02g0528200	Similar to Branching enzyme-3. (Os02t0528200-01)	93053.4	R-VVEELAAEQKPR-V	00000000000000	125	136	684.88	2	3.81308	2.967e-05	1
AK120980	Os02g0529700	Similar to Acidic ribosomal protein P2a-4 (Fragment). (Os02t0529700-01)	11604.7	K-MELLLSQLAGK-D	0000000000000	39	49	601.847	2	4.6997	0.0389282	1
AK121892	Os02g0533900	Similar to Carbon-nitrogen hydrolase family protein. (Os02t0533900-01), Similar to Carbon-nitrogen hydrolase family protein. (Os02t0533900-02)	33725.9	K-FYFNPGDTGFK-A	0000000000000	136	146	646.805	2	6.62564	0.045028	1
AK101459	Os02g0534800	Similar to 40S ribosomal protein S14 (Clone MCH2). (Os02t0534800-01)	16480.7	K-EENVTLGPTVR-E	0000000000000	12	22	607.827	2	6.79799	0.037115	3
AK101459	Os02g0534800	Similar to 40S ribosomal protein S14 (Clone MCH2). (Os02t0534800-01)	16480.7	K-TPGPGAQSALR-A	0000000000000	107	117	527.789	2	5.5761	0.0338514	3
AK101459	Os02g0534800	Similar to 40S ribosomal protein S14 (Clone MCH2). (Os02t0534800-01)	16480.7	R-IEDVTPVPTDSTR-R	000000000000000	129	141	715.368	2	7.69674	0.0336321	3
AK068919	Os02g0537700	Similar to 2-cys peroxiredoxin BAS1, chloroplast precursor (EC 1.11.1.15) (Thiol- specific antioxidant protein) (Fragment). (Os02t0537700-01)	28363.5	R-AGGVDDAPLVGNK-A	000000000000000	61	73	606.819	2	6.82576	0.00271154	7
AK068919	Os02g0537700	Similar to 2-cys peroxiredoxin BAS1, chloroplast precursor (EC 1.11.1.15) (Thiol- specific antioxidant protein) (Fragment). (Os02t0537700-01)	28363.5	R-KSGGLGDLKYPLISDVTK-S	00000000000000000000	155	172	631.026	3	4.97233	0.0324067	7
AK068919	Os02g0537700	Similar to 2-cys peroxiredoxin BAS1, chloroplast precursor (EC 1.11.1.15) (Thiol- specific antioxidant protein) (Fragment). (Os02t0537700-01)	28363.5	K-SGGLGDLKYPLISDVTK-S	0000000000000000000	156	172	881.986	2	3.88045	0.00372404	7
AK068919	Os02g0537700	Similar to 2-cys peroxiredoxin BAS1, chloroplast precursor (EC 1.11.1.15) (Thiol- specific antioxidant protein) (Fragment). (Os02t0537700-01)	28363.5	K-SFGVLIPDQGIALR-G	0000000000000000	177	190	743.429	2	5.37644	1.59621e-07	7
AK068919	Os02g0537700	Similar to 2-cys peroxiredoxin BAS1, chloroplast precursor (EC 1.11.1.15) (Thiol- specific antioxidant protein) (Fragment). (Os02t0537700-01)	28363.5	R-GLFIIDKEGVIQHSTINNLAIGR-S	0000000000000000000000000	191	213	836.808	3	5.92171	0.000169751	7
AK068919	Os02g0537700	Similar to 2-cys peroxiredoxin BAS1, chloroplast precursor (EC 1.11.1.15) (Thiol- specific antioxidant protein) (Fragment). (Os02t0537700-01)	28363.5	K-EGVIQHSTINNLAIGR-S	000000000000000000	198	213	861.473	2	5.43023	0.00879584	7
AK066564	Os02g0549600	Similar to 40S ribosomal protein S10-1. (Os02t0549600-01)	20321.2	K-KDYNLAKHPQIDVPNLQVIK-L	0000000000000000000000	25	44	778.443	3	6.67958	0.00304899	7
AK066564	Os02g0549600	Similar to 40S ribosomal protein S10-1. (Os02t0549600-01)	20321.2	K-HPQIDVPNLQVIK-L	000000000000000	32	44	750.936	2	7.33751	0.000243428	7
AK066564	Os02g0549600	Similar to 40S ribosomal protein S10-1. (Os02t0549600-01)	20321.2	K-SARPPGRPFGSGPPGDRPR-G	000000000000000000000	94	112	491.014	4	5.72235	0.0324633	7
AK066564	Os02g0549600	Similar to 40S ribosomal protein S10-1. (Os02t0549600-01)	20321.2	R-GPPRFEGDRPR-F	0000000000000	113	123	642.338	2	6.93326	0.00432366	7
AK066564	Os02g0549600	Similar to 40S ribosomal protein S10-1. (Os02t0549600-01)	20321.2	R-GAPGDFGGEKGGAPAEFQPSFR-S	000000000000000000000000	136	157	1090.02	2	6.60629	0.000295317	7
AK066564	Os02g0549600	Similar to 40S ribosomal protein S10-1. (Os02t0549600-01)	20321.2	K-GGAPAEFQPSFR-S	00000000000000	146	157	632.314	2	7.00839	0.0208167	7
AK102741	Os02g0550600	Plant neutral invertase family protein. (Os02t0550600-01)	64120.2	K-GVDTLHADFGESAIGR-V	000000000000000000	196	211	548.942	3	8.97058	0.0387292	2
AK102741	Os02g0550600	Plant neutral invertase family protein. (Os02t0550600-01)	64120.2	R-YKTEEYSHTAVNK-F	000000000000000	343	355	785.385	2	5.12679	0.000972144	2
AB114856	Os02g0553200	Similar to thylakoid-bound ascorbate peroxidase APx8. (Os02t0553200-01), Similar to thylakoid-bound ascorbate peroxidase APx8. (Os02t0553200-02)	51510.9	K-EIVALSGAHTLGR-S	000000000000000	238	250	662.377	2	6.12265	3.75084e-07	1
AK103125	Os02g0556100	NAD(P)-binding domain containing protein. (Os02t0556100-01)	31328.5	K-INGTANINAISVAAEK-G	000000000000000000	148	163	793.44	2	11.2649	0.000865259	4
AK103125	Os02g0556100	NAD(P)-binding domain containing protein. (Os02t0556100-01)	31328.5	K-RATEAELLSK-F	000000000000	191	200	559.315	2	0.681191	0.0158528	4
AK103125	Os02g0556100	NAD(P)-binding domain containing protein. (Os02t0556100-01)	31328.5	R-ATEAELLSK-F	00000000000	192	200	481.268	2	9.12901	0.00247944	4
AK103125	Os02g0556100	NAD(P)-binding domain containing protein. (Os02t0556100-01)	31328.5	R-LPLVGPLLTPPVSVASVAK-V	000000000000000000000	246	264	929.582	2	8.65012	0.00480839	4
AK064926	Os02g0557600	Translation initiation factor SUI1 domain containing protein. (Os02t0557600-01)	67265.7	K-VPDLLPAFTLK-G	0000000000000	89	99	607.367	2	5.89512	0.0338692	2
AK064926	Os02g0557600	Translation initiation factor SUI1 domain containing protein. (Os02t0557600-01)	67265.7	R-YVEKENLVK-Q	00000000000	440	448	561.317	2	5.96365	0.0430654	2
AK071800	Os02g0562700	Similar to Gamma hydroxybutyrate dehydrogenase (EC 1.1.1.61). (Os02t0562700-01), Similar to Gamma hydroxybutyrate dehydrogenase (EC 1.1.1.61). (Os02t0562700-02)	30689.8	--MEVGFLGLGIMGK-A	130000000000000	1	13	705.368	2	9.0917	0.00163626	8
AK071800	Os02g0562700	Similar to Gamma hydroxybutyrate dehydrogenase (EC 1.1.1.61). (Os02t0562700-01), Similar to Gamma hydroxybutyrate dehydrogenase (EC 1.1.1.61). (Os02t0562700-02)	30689.8	--MEVGFLGLGIMGK-A	100000000003000	1	13	705.369	2	9.43195	0.00322807	8
AK071800	Os02g0562700	Similar to Gamma hydroxybutyrate dehydrogenase (EC 1.1.1.61). (Os02t0562700-01), Similar to Gamma hydroxybutyrate dehydrogenase (EC 1.1.1.61). (Os02t0562700-02)	30689.8	--MEVGFLGLGIMGK-A	130000000003000	1	13	713.366	2	9.13066	0.00689319	8
AK071800	Os02g0562700	Similar to Gamma hydroxybutyrate dehydrogenase (EC 1.1.1.61). (Os02t0562700-01), Similar to Gamma hydroxybutyrate dehydrogenase (EC 1.1.1.61). (Os02t0562700-02)	30689.8	K-DGVLEQIGEGK-G	0000000000000	78	88	572.8	2	7.00419	0.0035718	8
AK071800	Os02g0562700	Similar to Gamma hydroxybutyrate dehydrogenase (EC 1.1.1.61). (Os02t0562700-01), Similar to Gamma hydroxybutyrate dehydrogenase (EC 1.1.1.61). (Os02t0562700-02)	30689.8	K-QKGGAFVEAPVSGSK-K	00000000000000000	110	124	487.932	3	8.46976	0.00219195	8
AK071800	Os02g0562700	Similar to Gamma hydroxybutyrate dehydrogenase (EC 1.1.1.61). (Os02t0562700-01), Similar to Gamma hydroxybutyrate dehydrogenase (EC 1.1.1.61). (Os02t0562700-02)	30689.8	K-GGAFVEAPVSGSK-K	000000000000000	112	124	603.315	2	6.214	1.24294e-06	8
AK071800	Os02g0562700	Similar to Gamma hydroxybutyrate dehydrogenase (EC 1.1.1.61). (Os02t0562700-01), Similar to Gamma hydroxybutyrate dehydrogenase (EC 1.1.1.61). (Os02t0562700-02)	30689.8	K-KPAEDGQLVILAAGDK-V	000000000000000000	125	140	812.953	2	5.25553	1.6595e-05	8
AK071800	Os02g0562700	Similar to Gamma hydroxybutyrate dehydrogenase (EC 1.1.1.61). (Os02t0562700-01), Similar to Gamma hydroxybutyrate dehydrogenase (EC 1.1.1.61). (Os02t0562700-02)	30689.8	K-SFFLGEIGNGAK-M	00000000000000	157	168	620.327	2	8.04092	0.002062	8
AK059007	Os02g0564200	Conserved hypothetical protein. (Os02t0564200-01), Conserved hypothetical protein. (Os02t0564200-02)	7461.79	K-GLNATGEFFR-R	000000000000	5	14	556.281	2	1.49295	7.95383e-05	1
AK068282	Os02g0567000	Conserved hypothetical protein. (Os02t0567000-01)	15645	R-AVTAIVEELQR-S	0000000000000	119	129	614.85	2	2.93323	0.0281663	1
AK121198	Os02g0575000	Conserved hypothetical protein. (Os02t0575000-01)	8873.43	R-MEAAEAAAAAAVAGKK-D	030000000000000000	26	41	738.37	2	-13.7675	0.0216421	1
AK102294	Os02g0576700	Nucleosome assembly protein (NAP) family protein. (Os02t0576700-01), Nucleosome assembly protein (NAP) family protein. (Os02t0576700-02)	28570.8	K-YLESVDVDDSKDVK-S	0000000000000000	108	121	806.399	2	9.68503	0.00446714	2
AK102294	Os02g0576700	Nucleosome assembly protein (NAP) family protein. (Os02t0576700-01), Nucleosome assembly protein (NAP) family protein. (Os02t0576700-02)	28570.8	K-TYAFADDGTTTINATSIK-W	00000000000000000000	144	161	945.466	2	6.55074	3.09513e-05	2
AK068248	Os02g0580300	Similar to 14-3-3 protein 6. (Os02t0580300-01), Similar to 14-3-3 protein 6. (Os02t0580300-02), Similar to 14-3-3 protein 6. (Os02t0580300-03)	29887	M-SQPAELSREENVYMAK-L	100000000000003000	2	17	955.455	2	3.93582	0.0108715	22
AK068248	Os02g0580300	Similar to 14-3-3 protein 6. (Os02t0580300-01), Similar to 14-3-3 protein 6. (Os02t0580300-02), Similar to 14-3-3 protein 6. (Os02t0580300-03)	29887	M-SQPAELSREENVYMAK-L	100000000000000000	2	17	947.462	2	8.50694	0.0119815	22
AK068248	Os02g0580300	Similar to 14-3-3 protein 6. (Os02t0580300-01), Similar to 14-3-3 protein 6. (Os02t0580300-02), Similar to 14-3-3 protein 6. (Os02t0580300-03)	29887	R-EENVYMAK-L	0000000000	10	17	492.232	2	6.15665	0.0458004	22
AK068248	Os02g0580300	Similar to 14-3-3 protein 6. (Os02t0580300-01), Similar to 14-3-3 protein 6. (Os02t0580300-02), Similar to 14-3-3 protein 6. (Os02t0580300-03)	29887	K-TVDSEELTVEER-N	00000000000000	38	49	703.839	2	5.07999	0.0375293	22
AK068248	Os02g0580300	Similar to 14-3-3 protein 6. (Os02t0580300-01), Similar to 14-3-3 protein 6. (Os02t0580300-02), Similar to 14-3-3 protein 6. (Os02t0580300-03)	29887	R-NLLSVAYK-N	0000000000	50	57	454.269	2	7.44822	0.00381178	22
AK068248	Os02g0580300	Similar to 14-3-3 protein 6. (Os02t0580300-01), Similar to 14-3-3 protein 6. (Os02t0580300-02), Similar to 14-3-3 protein 6. (Os02t0580300-03)	29887	R-NLLSVAYKNVIGAR-R	0000000000000000	50	63	759.448	2	6.1887	0.000310568	22
AK068248	Os02g0580300	Similar to 14-3-3 protein 6. (Os02t0580300-01), Similar to 14-3-3 protein 6. (Os02t0580300-02), Similar to 14-3-3 protein 6. (Os02t0580300-03)	29887	R-IISSIEQK-E	0000000000	69	76	459.274	2	10.6353	0.0209363	22
AK068248	Os02g0580300	Similar to 14-3-3 protein 6. (Os02t0580300-01), Similar to 14-3-3 protein 6. (Os02t0580300-02), Similar to 14-3-3 protein 6. (Os02t0580300-03)	29887	R-IISSIEQKEESR-G	00000000000000	69	80	709.882	2	5.21355	0.000123155	22
AK068248	Os02g0580300	Similar to 14-3-3 protein 6. (Os02t0580300-01), Similar to 14-3-3 protein 6. (Os02t0580300-02), Similar to 14-3-3 protein 6. (Os02t0580300-03)	29887	R-IISSIEQKEESRGNEDR-C	0000000000000000000	69	85	664.003	3	5.01253	0.00402073	22
AK068248	Os02g0580300	Similar to 14-3-3 protein 6. (Os02t0580300-01), Similar to 14-3-3 protein 6. (Os02t0580300-02), Similar to 14-3-3 protein 6. (Os02t0580300-03)	29887	K-LLDSHLVPSSTAPESK-V	000000000000000000	110	125	840.948	2	4.72503	0.0336745	22
AK068248	Os02g0580300	Similar to 14-3-3 protein 6. (Os02t0580300-01), Similar to 14-3-3 protein 6. (Os02t0580300-02), Similar to 14-3-3 protein 6. (Os02t0580300-03)	29887	R-KDAAENTMVAYK-A	00000000000000	149	160	670.833	2	5.62211	2.11277e-07	22
AK068248	Os02g0580300	Similar to 14-3-3 protein 6. (Os02t0580300-01), Similar to 14-3-3 protein 6. (Os02t0580300-02), Similar to 14-3-3 protein 6. (Os02t0580300-03)	29887	R-KDAAENTMVAYK-A	00000000300000	149	160	678.83	2	4.0835	0.014369	22
AK068248	Os02g0580300	Similar to 14-3-3 protein 6. (Os02t0580300-01), Similar to 14-3-3 protein 6. (Os02t0580300-02), Similar to 14-3-3 protein 6. (Os02t0580300-03)	29887	K-DAAENTMVAYK-A	0000000300000	150	160	614.783	2	5.98585	0.00034727	22
AK068248	Os02g0580300	Similar to 14-3-3 protein 6. (Os02t0580300-01), Similar to 14-3-3 protein 6. (Os02t0580300-02), Similar to 14-3-3 protein 6. (Os02t0580300-03)	29887	K-DAAENTMVAYK-A	0000000000000	150	160	606.784	2	4.08547	0.00711637	22
AK068248	Os02g0580300	Similar to 14-3-3 protein 6. (Os02t0580300-01), Similar to 14-3-3 protein 6. (Os02t0580300-02), Similar to 14-3-3 protein 6. (Os02t0580300-03)	29887	K-AAQDIALAELPPTHPIR-L	0000000000000000000	161	177	907.008	2	6.19565	2.60071e-06	22
AK068248	Os02g0580300	Similar to 14-3-3 protein 6. (Os02t0580300-01), Similar to 14-3-3 protein 6. (Os02t0580300-02), Similar to 14-3-3 protein 6. (Os02t0580300-03)	29887	K-DSTLIMQLLR-D	000000300000	223	232	603.336	2	8.09167	0.00110044	22
AK108467	Os02g0580500	Similar to Prohibitin. (Os02t0580500-01)	30233	M-AGGGQAAASLLTK-L	100000000000000	2	14	593.829	2	6.17855	1.10806e-07	4
AK108467	Os02g0580500	Similar to Prohibitin. (Os02t0580500-01)	30233	K-VLPSIGNEVLK-A	0000000000000	124	134	584.854	2	6.20497	0.00126788	4
AK108467	Os02g0580500	Similar to Prohibitin. (Os02t0580500-01)	30233	K-QVAQQEAER-S	00000000000	193	201	529.767	2	4.5067	0.000580771	4
AK108467	Os02g0580500	Similar to Prohibitin. (Os02t0580500-01)	30233	R-LISEATAAAGTGLIELR-R	0000000000000000000	229	245	843.481	2	6.63619	2.5057e-06	4
Os02g0583300	Os02g0583300	Similar to OSIGBa0132O24.3 protein. (Os02t0583300-00)	96960.6	K-KIPQKVLR-H	0000000000	257	264	491.335	2	6.07325	0.00746552	1
AK072777	Os02g0591700	Similar to Candida glabrata strain CBS138 chromosome L complete sequence. (Os02t0591700-01)	24243.2	K-FYPADDVKPR-A	000000000000	50	59	604.312	2	5.60224	0.00127244	9
AK072777	Os02g0591700	Similar to Candida glabrata strain CBS138 chromosome L complete sequence. (Os02t0591700-01)	24243.2	R-STITPGTVLILLAGR-Y	00000000000000000	73	87	756.467	2	6.78748	0.000440037	9
AK072777	Os02g0591700	Similar to Candida glabrata strain CBS138 chromosome L complete sequence. (Os02t0591700-01)	24243.2	K-SGLLLITGPFK-I	0000000000000	101	111	573.355	2	8.45462	0.000124564	9
AK072777	Os02g0591700	Similar to Candida glabrata strain CBS138 chromosome L complete sequence. (Os02t0591700-01)	24243.2	R-RVNQAYVIATSTK-V	000000000000000	119	131	484.275	3	5.69993	0.00688499	9
AK072777	Os02g0591700	Similar to Candida glabrata strain CBS138 chromosome L complete sequence. (Os02t0591700-01)	24243.2	R-VNQAYVIATSTK-V	00000000000000	120	131	647.857	2	4.88688	2.1997e-08	9
AK072777	Os02g0591700	Similar to Candida glabrata strain CBS138 chromosome L complete sequence. (Os02t0591700-01)	24243.2	K-VDISGVKVDKFDDKYFAR-D	00000000000000000000	132	149	701.373	3	6.39222	0.00250818	9
AK072777	Os02g0591700	Similar to Candida glabrata strain CBS138 chromosome L complete sequence. (Os02t0591700-01)	24243.2	K-KTEGELFETEKEATK-N	00000000000000000	157	171	580.632	3	6.85402	0.00977495	9
AK067412	Os02g0594100	Similar to Protein kinase ATN1. (Os02t0594100-01)	40037.6	R-VAVGFALDIAR-A	0000000000000	126	136	566.333	2	6.00089	0.016157	1
AK073096	Os02g0595500	Similar to NAD-dependent isocitrate dehydrogenase precursor (EC 1.1.1.41). (Os02t0595500-01)	41029.2	R-AVTLIPGDGIGPLVTGAVR-Q	000000000000000000000	50	68	903.53	2	2.02594	0.00134326	4
AK073096	Os02g0595500	Similar to NAD-dependent isocitrate dehydrogenase precursor (EC 1.1.1.41). (Os02t0595500-01)	41029.2	K-GGLATPVGGGVSSLNVQLR-K	000000000000000000000	109	127	891.5	2	3.78014	0.000891099	4
AK073096	Os02g0595500	Similar to NAD-dependent isocitrate dehydrogenase precursor (EC 1.1.1.41). (Os02t0595500-01)	41029.2	R-HDNVDIVVIR-E	000000000000	149	158	590.332	2	6.56411	2.90797e-05	4
AK073096	Os02g0595500	Similar to NAD-dependent isocitrate dehydrogenase precursor (EC 1.1.1.41). (Os02t0595500-01)	41029.2	K-YAFEYAYLNNR-K	0000000000000	194	204	712.341	2	7.07456	0.000640265	4
AK119587	Os02g0595700	Chloroplast translational elongation factor Tu. (Os02t0595700-01), Chloroplast elongation factor TuA (EF-TuA) precursor (Fragment). (Os02t0595700-02), Chloroplast translational elongation factor Tu. (Os02t0595700-03), Chloroplast translational elongation factor Tu. (Os02t0595700-04)	50666	K-KYDEIDAAPEER-A	00000000000000	104	115	718.343	2	6.32358	9.99658e-07	2
AK119587	Os02g0595700	Chloroplast translational elongation factor Tu. (Os02t0595700-01), Chloroplast elongation factor TuA (EF-TuA) precursor (Fragment). (Os02t0595700-02), Chloroplast translational elongation factor Tu. (Os02t0595700-03), Chloroplast translational elongation factor Tu. (Os02t0595700-04)	50666	K-ALENLMANPAIK-R	00000000000000	236	247	642.856	2	5.18312	0.000534396	2
Os02g0595800	Os02g0595800	Similar to Eukaryotic initiation factor 4B (Fragment). (Os02t0595800-01)	55710.6	R-KIDLELEHR-R	00000000000	374	382	576.825	2	5.52247	0.00980279	1
AK072562	Os02g0596500	Snf7 family protein. (Os02t0596500-01)	25452.3	K-LAQFQQQLEK-V	000000000000	28	37	616.839	2	6.06398	0.00420379	1
AK071215	Os02g0600100	Similar to 26S proteasome subunit RPN7. (Os02t0600100-01)	44263.9	--MDAGGEEAKQER-H	10000000000000	1	12	681.805	2	5.37104	1.25489e-06	4
AK071215	Os02g0600100	Similar to 26S proteasome subunit RPN7. (Os02t0600100-01)	44263.9	K-IADAEENLGESEVR-E	0000000000000000	87	100	766.371	2	7.49441	7.04914e-08	4
AK071215	Os02g0600100	Similar to 26S proteasome subunit RPN7. (Os02t0600100-01)	44263.9	R-TVVYSQFLESYK-S	00000000000000	300	311	732.378	2	4.96874	0.0209466	4
AK071215	Os02g0600100	Similar to 26S proteasome subunit RPN7. (Os02t0600100-01)	44263.9	R-NAFYQATIK-Q	00000000000	362	370	528.283	2	5.47434	0.00357199	4
AK099086	Os02g0601300	Similar to Glyceraldehyde-3-phosphate dehydrogenase, cytosolic 3 (EC 1.2.1.12). (Os02t0601300-01)	36758	K-YDTVHGQWK-H	00000000000	49	57	567.276	2	5.76527	0.00185312	36
AK099086	Os02g0601300	Similar to Glyceraldehyde-3-phosphate dehydrogenase, cytosolic 3 (EC 1.2.1.12). (Os02t0601300-01)	36758	K-KVVISAPSK-D	00000000000	120	128	464.798	2	6.03058	0.00461659	36
AK099086	Os02g0601300	Similar to Glyceraldehyde-3-phosphate dehydrogenase, cytosolic 3 (EC 1.2.1.12). (Os02t0601300-01)	36758	K-KVVISAPSKDAPMFVVGVNEK-E	00000000000000000000000	120	140	739.08	3	4.8398	0.000170447	36
AK099086	Os02g0601300	Similar to Glyceraldehyde-3-phosphate dehydrogenase, cytosolic 3 (EC 1.2.1.12). (Os02t0601300-01)	36758	K-KVVISAPSKDAPMFVVGVNEK-E	00000000000003000000000	120	140	744.415	3	9.52067	0.0145942	36
AK099086	Os02g0601300	Similar to Glyceraldehyde-3-phosphate dehydrogenase, cytosolic 3 (EC 1.2.1.12). (Os02t0601300-01)	36758	K-VVISAPSKDAPMFVVGVNEK-E	0000000000000000000000	121	140	1044.07	2	3.67888	0.000244641	36
AK099086	Os02g0601300	Similar to Glyceraldehyde-3-phosphate dehydrogenase, cytosolic 3 (EC 1.2.1.12). (Os02t0601300-01)	36758	K-VVISAPSKDAPMFVVGVNEK-E	0000000000003000000000	121	140	701.716	3	8.28778	0.00290656	36
AK099086	Os02g0601300	Similar to Glyceraldehyde-3-phosphate dehydrogenase, cytosolic 3 (EC 1.2.1.12). (Os02t0601300-01)	36758	K-VVISAPSKDAPMFVVGVNEKEYK-S	0000000000000000000000000	121	143	836.451	3	6.40763	1.42663e-06	36
AK099086	Os02g0601300	Similar to Glyceraldehyde-3-phosphate dehydrogenase, cytosolic 3 (EC 1.2.1.12). (Os02t0601300-01)	36758	K-VVISAPSKDAPMFVVGVNEKEYK-S	0000000000003000000000000	121	143	841.783	3	7.70982	0.0300632	36
AK099086	Os02g0601300	Similar to Glyceraldehyde-3-phosphate dehydrogenase, cytosolic 3 (EC 1.2.1.12). (Os02t0601300-01)	36758	K-DAPMFVVGVNEK-E	00000000000000	129	140	653.332	2	5.08929	1.93262e-06	36
AK099086	Os02g0601300	Similar to Glyceraldehyde-3-phosphate dehydrogenase, cytosolic 3 (EC 1.2.1.12). (Os02t0601300-01)	36758	K-DAPMFVVGVNEK-E	00003000000000	129	140	661.332	2	8.03757	1.7079e-05	36
AK099086	Os02g0601300	Similar to Glyceraldehyde-3-phosphate dehydrogenase, cytosolic 3 (EC 1.2.1.12). (Os02t0601300-01)	36758	K-DAPMFVVGVNEKEYK-S	00000000000000000	129	143	863.436	2	7.06654	0.000223707	36
AK099086	Os02g0601300	Similar to Glyceraldehyde-3-phosphate dehydrogenase, cytosolic 3 (EC 1.2.1.12). (Os02t0601300-01)	36758	K-DAPMFVVGVNEKEYK-S	00003000000000000	129	143	871.433	2	7.25472	0.0497556	36
AK099086	Os02g0601300	Similar to Glyceraldehyde-3-phosphate dehydrogenase, cytosolic 3 (EC 1.2.1.12). (Os02t0601300-01)	36758	K-VINDRFGIVEGLMTTVHAITATQK-T	00000000000000000000000000	165	188	872.144	3	6.11329	0.0316555	36
AK099086	Os02g0601300	Similar to Glyceraldehyde-3-phosphate dehydrogenase, cytosolic 3 (EC 1.2.1.12). (Os02t0601300-01)	36758	R-FGIVEGLMTTVHAITATQK-T	000000003000000000000	170	188	1017.05	2	8.24837	2.48322e-06	36
AK099086	Os02g0601300	Similar to Glyceraldehyde-3-phosphate dehydrogenase, cytosolic 3 (EC 1.2.1.12). (Os02t0601300-01)	36758	R-FGIVEGLMTTVHAITATQK-T	000000000000000000000	170	188	1009.05	2	8.09523	0.00561717	36
AK099086	Os02g0601300	Similar to Glyceraldehyde-3-phosphate dehydrogenase, cytosolic 3 (EC 1.2.1.12). (Os02t0601300-01)	36758	R-AASFNIIPSSTGAAK-A	00000000000000000	203	217	717.886	2	4.51952	0.0498149	36
AK099086	Os02g0601300	Similar to Glyceraldehyde-3-phosphate dehydrogenase, cytosolic 3 (EC 1.2.1.12). (Os02t0601300-01)	36758	K-LTGMAFRVPTVDVSVVDLTVR-L	00003000000000000000000	230	250	764.425	3	7.74962	3.97853e-05	36
AK099086	Os02g0601300	Similar to Glyceraldehyde-3-phosphate dehydrogenase, cytosolic 3 (EC 1.2.1.12). (Os02t0601300-01)	36758	K-LTGMAFRVPTVDVSVVDLTVR-L	00000000000000000000000	230	250	759.095	3	10.0168	0.00101202	36
AK099086	Os02g0601300	Similar to Glyceraldehyde-3-phosphate dehydrogenase, cytosolic 3 (EC 1.2.1.12). (Os02t0601300-01)	36758	R-VPTVDVSVVDLTVR-L	0000000000000000	237	250	749.932	2	6.11122	0.00023925	36
AK099086	Os02g0601300	Similar to Glyceraldehyde-3-phosphate dehydrogenase, cytosolic 3 (EC 1.2.1.12). (Os02t0601300-01)	36758	R-VPTVDVSVVDLTVRLEKPASYDQIK-A	000000000000000000000000000	237	261	924.513	3	2.11246	0.0119946	36
AK099086	Os02g0601300	Similar to Glyceraldehyde-3-phosphate dehydrogenase, cytosolic 3 (EC 1.2.1.12). (Os02t0601300-01)	36758	R-LEKPASYDQIK-A	0000000000000	251	261	646.352	2	6.07796	0.000689	36
AK099086	Os02g0601300	Similar to Glyceraldehyde-3-phosphate dehydrogenase, cytosolic 3 (EC 1.2.1.12). (Os02t0601300-01)	36758	K-AAIKEEAEGK-L	000000000000	262	271	523.283	2	5.88401	3.26172e-05	36
AK099086	Os02g0601300	Similar to Glyceraldehyde-3-phosphate dehydrogenase, cytosolic 3 (EC 1.2.1.12). (Os02t0601300-01)	36758	K-AAIKEEAEGKLK-G	00000000000000	262	273	643.874	2	7.09922	0.0486547	36
AK099086	Os02g0601300	Similar to Glyceraldehyde-3-phosphate dehydrogenase, cytosolic 3 (EC 1.2.1.12). (Os02t0601300-01)	36758	K-GILGYVEEDLVSTDFQGDSR-S	0000000000000000000000	274	293	1100.53	2	8.71168	4.97136e-05	36
AK099086	Os02g0601300	Similar to Glyceraldehyde-3-phosphate dehydrogenase, cytosolic 3 (EC 1.2.1.12). (Os02t0601300-01)	36758	K-AGIALSDTFVK-L	0000000000000	301	311	561.315	2	2.99742	1.19923e-05	36
AK099086	Os02g0601300	Similar to Glyceraldehyde-3-phosphate dehydrogenase, cytosolic 3 (EC 1.2.1.12). (Os02t0601300-01)	36758	K-LVSWYDNEWGYSTR-V	0000000000000000	312	325	888.412	2	7.58545	0.00482418	36
AK099086	Os02g0601300	Similar to Glyceraldehyde-3-phosphate dehydrogenase, cytosolic 3 (EC 1.2.1.12). (Os02t0601300-01)	36758	R-VIDLIRHMHSTN--	00000000000000	326	337	718.383	2	7.34288	0.00146474	36
AK109261	Os02g0607700	Short-chain dehydrogenase/reductase SDR domain containing protein. (Os02t0607700-01)	32292.8	R-LAEQGLAVVLTAR-D	000000000000000	40	52	670.902	2	4.98955	3.06654e-05	2
AK109261	Os02g0607700	Short-chain dehydrogenase/reductase SDR domain containing protein. (Os02t0607700-01)	32292.8	R-ILNISSQLGLLNK-V	000000000000000	152	164	706.932	2	6.37968	0.000546442	2
AK100424	Os02g0608400	EF-Hand type domain containing protein. (Os02t0608400-01), Similar to Ca2+ binding protein cbp1. (Os02t0608400-02)	87229.2	R-RGEHVSNDEILNFAK-L	00000000000000000	356	370	576.963	3	5.13146	0.000109033	3
AK100424	Os02g0608400	EF-Hand type domain containing protein. (Os02t0608400-01), Similar to Ca2+ binding protein cbp1. (Os02t0608400-02)	87229.2	R-ALAVLASASSVSK-E	000000000000000	600	612	602.355	2	6.45882	2.26884e-07	3
AK100424	Os02g0608400	EF-Hand type domain containing protein. (Os02t0608400-01), Similar to Ca2+ binding protein cbp1. (Os02t0608400-02)	87229.2	K-LASQTDENNEDEEEGRQ--	0000000000000000000	751	767	982.413	2	3.70516	0.00212829	3
AK102477	Os02g0610400	Lupus La protein family protein. (Os02t0610400-01)	51942.2	R-QVEFYFSDSNLPR-D	000000000000000	21	33	801.385	2	2.13443	0.000639131	1
AK072083	Os02g0611500	Similar to Eukaryotic initiation factor-like protein. (Os02t0611500-01)	86575	K-AQVGPAPALVK-A	0000000000000	179	189	525.821	2	4.4749	0.00139949	1
AK070784	Os02g0613900	Similar to Adenine phosphoribosyltransferase 2 (EC 2.4.2.7) (APRT). (Os02t0613900-01), Similar to adenine phosphoribosyltransferase 2. (Os02t0613900-02)	23081.3	R-LQGISDAIR-V	00000000000	38	46	486.78	2	5.4953	0.0278363	1
J065096D10	Os02g0618250	#N/A	7533.98	K-ESPLGVPTQSAHPAR-F	00000000000000000	20	34	773.906	2	5.09106	0.00118487	1
AK101006	Os02g0621700	Similar to Succinyl-CoA ligase [GDP-forming] beta-chain, mitochondrial precursor (EC 6.2.1.4) (Succinyl-CoA synthetase, beta chain) (SCS-beta). (Os02t0621700-01)	45488.9	R-LNIHEYQGAELMGK-Y	0000000000000000	28	41	801.905	2	5.14275	0.0120369	14
AK101006	Os02g0621700	Similar to Succinyl-CoA ligase [GDP-forming] beta-chain, mitochondrial precursor (EC 6.2.1.4) (Succinyl-CoA synthetase, beta chain) (SCS-beta). (Os02t0621700-01)	45488.9	R-LNIHEYQGAELMGK-Y	0000000000003000	28	41	540.269	3	1.55046	0.013841	14
AK101006	Os02g0621700	Similar to Succinyl-CoA ligase [GDP-forming] beta-chain, mitochondrial precursor (EC 6.2.1.4) (Succinyl-CoA synthetase, beta chain) (SCS-beta). (Os02t0621700-01)	45488.9	R-GAAAGSVEEVKNTLK-N	00000000000000000	49	63	737.407	2	10.3342	8.3775e-06	14
AK101006	Os02g0621700	Similar to Succinyl-CoA ligase [GDP-forming] beta-chain, mitochondrial precursor (EC 6.2.1.4) (Succinyl-CoA synthetase, beta chain) (SCS-beta). (Os02t0621700-01)	45488.9	K-NVFPSEKEIVVK-S	00000000000000	64	75	694.888	2	-6.50104	0.0029947	14
AK101006	Os02g0621700	Similar to Succinyl-CoA ligase [GDP-forming] beta-chain, mitochondrial precursor (EC 6.2.1.4) (Succinyl-CoA synthetase, beta chain) (SCS-beta). (Os02t0621700-01)	45488.9	K-SGLQGGVHIVK-A	0000000000000	90	100	547.827	2	13.7845	0.00111256	14
AK101006	Os02g0621700	Similar to Succinyl-CoA ligase [GDP-forming] beta-chain, mitochondrial precursor (EC 6.2.1.4) (Succinyl-CoA synthetase, beta chain) (SCS-beta). (Os02t0621700-01)	45488.9	K-SGLQGGVHIVKAEEAESLAAK-M	00000000000000000000000	90	110	698.715	3	5.26824	3.68768e-05	14
AK101006	Os02g0621700	Similar to Succinyl-CoA ligase [GDP-forming] beta-chain, mitochondrial precursor (EC 6.2.1.4) (Succinyl-CoA synthetase, beta chain) (SCS-beta). (Os02t0621700-01)	45488.9	K-MLGQILVTK-Q	00000000000	111	119	501.807	2	5.17928	7.6583e-05	14
AK101006	Os02g0621700	Similar to Succinyl-CoA ligase [GDP-forming] beta-chain, mitochondrial precursor (EC 6.2.1.4) (Succinyl-CoA synthetase, beta chain) (SCS-beta). (Os02t0621700-01)	45488.9	K-GITDDDAAKVVDGLAPK-T	0000000000000000000	189	205	842.945	2	3.88697	0.043989	14
AK101006	Os02g0621700	Similar to Succinyl-CoA ligase [GDP-forming] beta-chain, mitochondrial precursor (EC 6.2.1.4) (Succinyl-CoA synthetase, beta chain) (SCS-beta). (Os02t0621700-01)	45488.9	K-LNFDDNAAFR-Q	000000000000	251	260	591.785	2	8.01304	0.000140925	14
AK101006	Os02g0621700	Similar to Succinyl-CoA ligase [GDP-forming] beta-chain, mitochondrial precursor (EC 6.2.1.4) (Succinyl-CoA synthetase, beta chain) (SCS-beta). (Os02t0621700-01)	45488.9	R-DTTQEDPREVAAAK-A	0000000000000000	269	282	765.878	2	6.29408	0.00130837	14
AK101006	Os02g0621700	Similar to Succinyl-CoA ligase [GDP-forming] beta-chain, mitochondrial precursor (EC 6.2.1.4) (Succinyl-CoA synthetase, beta chain) (SCS-beta). (Os02t0621700-01)	45488.9	K-LHGGTPANFLDVGGSASEGQVVEAFK-I	0000000000000000000000000000	313	338	863.102	3	5.46787	0.00113288	14
AK101006	Os02g0621700	Similar to Succinyl-CoA ligase [GDP-forming] beta-chain, mitochondrial precursor (EC 6.2.1.4) (Succinyl-CoA synthetase, beta chain) (SCS-beta). (Os02t0621700-01)	45488.9	K-AILVNIFGGIMK-C	00000000000300	348	359	646.379	2	5.151	0.0119212	14
AK101006	Os02g0621700	Similar to Succinyl-CoA ligase [GDP-forming] beta-chain, mitochondrial precursor (EC 6.2.1.4) (Succinyl-CoA synthetase, beta chain) (SCS-beta). (Os02t0621700-01)	45488.9	R-LEGTNVDQGKR-I	0000000000000	384	394	608.821	2	5.872	0.00022757	14
016-034-F01	Os02g0622300	Ribosomal protein L14 family protein. (Os02t0622300-00)	4714.43	R-VALVNYGKDYGR-L	00000000000000	12	23	677.862	2	3.60103	0.000139379	4
016-034-F01	Os02g0622300	Ribosomal protein L14 family protein. (Os02t0622300-00)	4714.43	R-LVVIVDVVDQNR-G	00000000000000	24	35	684.9	2	5.3767	1.28635e-06	4
AK061679	Os02g0622400	Glycolipid transfer protein, GLTP domain containing protein. (Os02t0622400-01)	22971.5	K-FGAAMALVK-S	00000000000	42	50	454.26	2	7.30088	0.0034365	4
AK061679	Os02g0622400	Glycolipid transfer protein, GLTP domain containing protein. (Os02t0622400-01)	22971.5	K-SDIGGNITR-L	00000000000	51	59	466.746	2	5.76652	0.000110945	4
AK061679	Os02g0622400	Glycolipid transfer protein, GLTP domain containing protein. (Os02t0622400-01)	22971.5	K-FMEVISGTGDIK-A	00000000000000	159	170	648.832	2	4.72002	1.16727e-08	4
AK061679	Os02g0622400	Glycolipid transfer protein, GLTP domain containing protein. (Os02t0622400-01)	22971.5	K-FMEVISGTGDIK-A	00300000000000	159	170	656.832	2	8.43899	0.00157829	4
AK066521	Os02g0623500	Lysyl-tRNA synthetase, class II domain containing protein. (Os02t0623500-01), Similar to Lysyl-tRNA synthetase. (Os02t0623500-02)	66288.8	R-YVDMIANPEVADVFRTRAK-A	000030000000000000000	227	245	737.709	3	-4.05309	0.0236085	1
AK101791	Os02g0625500	Similar to Adenosine kinase-like protein (Fragment). (Os02t0625500-01)	41318.1	K-GNVEYIAGGATQNSIR-V	000000000000000000	89	104	825.42	2	5.16646	2.47405e-07	3
AK101791	Os02g0625500	Similar to Adenosine kinase-like protein (Fragment). (Os02t0625500-01)	41318.1	K-VRGWETENVEEIALK-I	00000000000000000	264	278	591.647	3	5.70216	0.0175904	3
AK101791	Os02g0625500	Similar to Adenosine kinase-like protein (Fragment). (Os02t0625500-01)	41318.1	R-GWETENVEEIALK-I	000000000000000	266	278	759.383	2	7.25721	0.0300707	3
AK101791	Os02g0625500	Similar to Adenosine kinase-like protein (Fragment). (Os02t0625500-01)	41318.1	K-ISQLPLASGK-Q	000000000000	279	288	507.305	2	2.98933	0.00886231	3
AK101791	Os02g0625500	Similar to Adenosine kinase-like protein (Fragment). (Os02t0625500-01)	41318.1	R-IAVITQGADPVVVAEDGQVK-T	0000000000000000000000	292	311	1005.06	2	5.94843	1.7491e-06	3
AK058725	Os02g0628800	Similar to Ubiquitin-like protein 5. (Os02t0628800-01)	8594.46	--MIEVVLNDRLGK-K	03000000000000	1	12	701.892	2	2.97695	0.0207163	2
AK058725	Os02g0628800	Similar to Ubiquitin-like protein 5. (Os02t0628800-01)	8594.46	K-LVAAQTGTR-A	00000000000	30	38	458.767	2	6.37469	0.0100033	2
AK073723	Os02g0633400	Similar to 61 kDa protein homolog. (Os02t0633400-01)	31872.5	R-NAQALLPLTVK-Q	0000000000000	54	64	584.362	2	6.86389	0.00269439	5
AK073723	Os02g0633400	Similar to 61 kDa protein homolog. (Os02t0633400-01)	31872.5	K-SQVNANTATGTPNQTMPR-D	00000000000000000000	188	205	944.461	2	9.30478	0.00036151	5
AK073723	Os02g0633400	Similar to 61 kDa protein homolog. (Os02t0633400-01)	31872.5	R-RLNLPEETVGK-I	0000000000000	262	272	628.355	2	1.96704	0.00856799	5
AK073723	Os02g0633400	Similar to 61 kDa protein homolog. (Os02t0633400-01)	31872.5	R-LNLPEETVGK-I	000000000000	263	272	550.306	2	5.37519	0.00433828	5
AK072855	Os02g0634900	Proteasome subunit alpha type 2 (EC 3.4.25.1) (20S proteasome alpha subunit B) (20S proteasome subunit alpha-2). (Os02t0634900-01)	25828.3	K-LVQIEHALTAVGSGQTSLGIK-A	00000000000000000000000	19	39	1061.61	2	8.8173	7.88971e-05	6
AK072855	Os02g0634900	Proteasome subunit alpha type 2 (EC 3.4.25.1) (20S proteasome alpha subunit B) (20S proteasome subunit alpha-2). (Os02t0634900-01)	25828.3	K-IQSLTPNIGVVYSGMGPDFR-V	0000000000000003000000	65	84	1084.05	2	7.44013	1.69986e-07	6
AK072855	Os02g0634900	Proteasome subunit alpha type 2 (EC 3.4.25.1) (20S proteasome alpha subunit B) (20S proteasome subunit alpha-2). (Os02t0634900-01)	25828.3	K-IQSLTPNIGVVYSGMGPDFR-V	0000000000000000000000	65	84	1076.05	2	5.70138	6.65099e-07	6
AK072855	Os02g0634900	Proteasome subunit alpha type 2 (EC 3.4.25.1) (20S proteasome alpha subunit B) (20S proteasome subunit alpha-2). (Os02t0634900-01)	25828.3	K-ETIPVTQLVR-E	000000000000	103	112	578.345	2	8.92546	0.000709706	6
AK072855	Os02g0634900	Proteasome subunit alpha type 2 (EC 3.4.25.1) (20S proteasome alpha subunit B) (20S proteasome subunit alpha-2). (Os02t0634900-01)	25828.3	K-EGYEGQISANNIEIGVIR-S	00000000000000000000	197	214	981.504	2	4.26183	0.0018987	6
AK069985	Os02g0635200	Similar to Nitrilase 2 (EC 3.5.5.1). (Os02t0635200-01)	39077.7	K-YHAAAIEVPGPEVTR-L	00000000000000000	105	119	805.425	2	5.62374	0.00418675	2
AK069985	Os02g0635200	Similar to Nitrilase 2 (EC 3.5.5.1). (Os02t0635200-01)	39077.7	K-VFLVMGVIER-E	000000000000	129	138	581.841	2	7.39292	0.000119925	2
AK060633	Os02g0638400	BRO1 domain containing protein. (Os02t0638400-01)	38829.6	K-AAVVFNVGAASSR-I	000000000000000	107	119	624.842	2	5.24693	0.00107901	1
AK069079	Os02g0640300	Similar to Membrane steroid binding protein 1 (AtMP1). (Os02t0640300-01)	35542.4	K-GQIYDVTQSR-M	000000000000	93	102	583.8	2	11.2658	0.00123261	1
AK102431	Os02g0644100	Similar to Heat shock protein STI (Stress inducible protein) (GmSTI). (Os02t0644100-01), Similar to heat shock protein STI. (Os02t0644100-02)	65228.8	R-HFTDAIALAPGNHVLYSNR-S	000000000000000000000	24	42	699.363	3	3.86351	0.00107708	10
AK102431	Os02g0644100	Similar to Heat shock protein STI (Stress inducible protein) (GmSTI). (Os02t0644100-01), Similar to heat shock protein STI. (Os02t0644100-02)	65228.8	R-SAALASVHR-Y	00000000000	43	51	456.258	2	4.21252	0.00254825	10
AK102431	Os02g0644100	Similar to Heat shock protein STI (Stress inducible protein) (GmSTI). (Os02t0644100-01), Similar to heat shock protein STI. (Os02t0644100-02)	65228.8	K-TVELKPDWAK-G	000000000000	62	71	593.831	2	7.21501	0.00834326	10
AK102431	Os02g0644100	Similar to Heat shock protein STI (Stress inducible protein) (GmSTI). (Os02t0644100-01), Similar to heat shock protein STI. (Os02t0644100-02)	65228.8	R-LGAAHLGLGDAASAVAAYEK-G	0000000000000000000000	76	95	942.996	2	1.29216	0.000641697	10
AK102431	Os02g0644100	Similar to Heat shock protein STI (Stress inducible protein) (GmSTI). (Os02t0644100-01), Similar to heat shock protein STI. (Os02t0644100-02)	65228.8	K-GLALDPTNEGLK-A	00000000000000	96	107	614.335	2	4.24687	0.00986052	10
AK102431	Os02g0644100	Similar to Heat shock protein STI (Stress inducible protein) (GmSTI). (Os02t0644100-01), Similar to heat shock protein STI. (Os02t0644100-02)	65228.8	K-IQRPEASESSQPSSSPPSQPQEQPEAK-A	00000000000000000000000000000	195	221	969.471	3	7.40095	0.000292317	10
AK102431	Os02g0644100	Similar to Heat shock protein STI (Stress inducible protein) (GmSTI). (Os02t0644100-01), Similar to heat shock protein STI. (Os02t0644100-02)	65228.8	R-GDLTQEEIQER-Q	0000000000000	510	520	659.32	2	3.53698	0.0394073	10
AK102431	Os02g0644100	Similar to Heat shock protein STI (Stress inducible protein) (GmSTI). (Os02t0644100-01), Similar to heat shock protein STI. (Os02t0644100-02)	65228.8	R-QVLVDLQENPR-A	0000000000000	541	551	655.863	2	9.82141	0.00357151	10
J033067E03	Os02g0653800	Similar to GTP-binding protein. (Os02t0653800-01)	22703.3	K-LQIWDTAGQER-F	0000000000000	59	69	658.837	2	5.76318	0.000109791	4
J033067E03	Os02g0653800	Similar to GTP-binding protein. (Os02t0653800-01)	22703.3	R-TITSSYYR-G	0000000000	72	79	495.752	2	7.01158	0.0295256	4
J033067E03	Os02g0653800	Similar to GTP-binding protein. (Os02t0653800-01)	22703.3	K-SDLTANKVVSSETAK-A	00000000000000000	123	137	775.414	2	8.6844	0.0132469	4
AK066320	Os02g0654500	Peptidase C12, ubiquitin carboxyl-terminal hydrolase 1 family protein. (Os02t0654500-01)	25178.1	K-LKLVEGSYFDR-F	0000000000000	112	122	663.861	2	6.92238	0.0285685	3
AK066320	Os02g0654500	Peptidase C12, ubiquitin carboxyl-terminal hydrolase 1 family protein. (Os02t0654500-01)	25178.1	K-LVEGSYFDR-F	00000000000	114	122	543.27	2	5.14201	6.71819e-05	3
AK066320	Os02g0654500	Peptidase C12, ubiquitin carboxyl-terminal hydrolase 1 family protein. (Os02t0654500-01)	25178.1	K-QTVDMDPVQR-A	000000000000	126	135	594.791	2	6.59223	0.00339125	3
AY363174	Os02g0655300	Similar to 3-isopropylmalate dehydratase, small subunit. (Os02t0655300-01), Similar to 3-isopropylmalate dehydratase, small subunit. (Os02t0655300-02), Similar to 3-isopropylmalate dehydratase, small subunit. (Os02t0655300-03)	26951.7	R-AVVAEGYAR-I	00000000000	167	175	468.253	2	5.54721	0.00233049	2
AY363174	Os02g0655300	Similar to 3-isopropylmalate dehydratase, small subunit. (Os02t0655300-01), Similar to 3-isopropylmalate dehydratase, small subunit. (Os02t0655300-02), Similar to 3-isopropylmalate dehydratase, small subunit. (Os02t0655300-03)	26951.7	K-LKPIGDAGPVIEAGGIFAYAR-K	00000000000000000000000	227	247	705.728	3	4.38649	0.000743198	2
Os02g0661000	Os02g0661000	Similar to peroxisomal biogenesis factor 19. (Os02t0661000-00)	26887.2	K-SGGEASAASSSSSGSGDAKPVK-G	000000000000000000000000	35	56	962.453	2	5.24649	7.77066e-07	2
AK067099	Os02g0664300	Peptidase S8 and S53, subtilisin, kexin, sedolisin domain containing protein. (Os02t0664300-01), Similar to predicted protein. (Os02t0664300-02), Similar to predicted protein. (Os02t0664300-03)	149819	K-IIGLDGSEAPVR-V	00000000000000	862	873	613.844	2	6.32652	0.00745195	1
AK073120	Os02g0665000	Similar to Malic enzyme. (Os02t0665000-01), Similar to NADP-malic enzyme. (Os02t0665000-02)	20639.2	R-RPQGLYISLKDK-G	00000000000000	44	55	473.279	3	4.4822	0.00106452	4
AK073120	Os02g0665000	Similar to Malic enzyme. (Os02t0665000-01), Similar to NADP-malic enzyme. (Os02t0665000-02)	20639.2	K-ILEVLKNWPER-S	0000000000000	58	68	698.902	2	0.907853	0.000351557	4
AK073120	Os02g0665000	Similar to Malic enzyme. (Os02t0665000-01), Similar to NADP-malic enzyme. (Os02t0665000-02)	20639.2	K-LSLYTALGGVR-A	0000000000000	99	109	575.338	2	5.52545	2.30955e-05	4
AB079636	Os02g0670400	Similar to HMGc1 protein. (Os02t0670400-01)	15755.7	R-AMSEQEKAPYVDK-A	000000000000000	74	86	748.364	2	7.88386	0.00396864	1
AK111553	Os02g0672200	Similar to AGO1 homologous protein. (Os02t0672200-01), Similar to Protein argonaute 1A. (Os02t0672200-02)	121510	R-AVIGEIVTQYR-Q	0000000000000	255	265	624.853	2	3.88091	0.000654096	2
AK111553	Os02g0672200	Similar to AGO1 homologous protein. (Os02t0672200-01), Similar to Protein argonaute 1A. (Os02t0672200-02)	121510	K-YAGLVSAQAHR-Q	0000000000000	822	832	586.815	2	3.98848	0.0159759	2
AK065315	Os02g0675700	Protein of unknown function DUF248, methyltransferase putative family protein. (Os02t0675700-01)	72658.8	R-DSHEAQVQFALER-G	000000000000000	271	283	765.375	2	5.82917	0.00544967	1
AK071766	Os02g0678400	NAD(P)-binding domain containing protein. (Os02t0678400-01)	35034.7	R-MPISSDLSNPR-N	0300000000000	179	189	616.804	2	6.30508	0.0194172	2
AK071766	Os02g0678400	NAD(P)-binding domain containing protein. (Os02t0678400-01)	35034.7	R-MPISSDLSNPR-N	0000000000000	179	189	608.807	2	5.82862	6.71627e-07	2
AK102210	Os02g0680400	Similar to CaaX processing zinc-metallo endoprotease. (Os02t0680400-01), Similar to CAAX prenyl protease 1 homolog. (Os02t0680400-02)	48619.7	K-LFVVDGSTR-S	00000000000	237	245	497.275	2	6.40893	0.0229825	3
AK102210	Os02g0680400	Similar to CaaX processing zinc-metallo endoprotease. (Os02t0680400-01), Similar to CAAX prenyl protease 1 homolog. (Os02t0680400-02)	48619.7	R-AFEFQADAFAK-N	0000000000000	360	370	622.805	2	6.11909	0.000961351	3
AK102210	Os02g0680400	Similar to CaaX processing zinc-metallo endoprotease. (Os02t0680400-01), Similar to CAAX prenyl protease 1 homolog. (Os02t0680400-02)	48619.7	R-LSALEDADSKKEN--	000000000000000	413	425	473.906	3	5.29219	0.0225778	3
Os02g0684000	Os02g0684000	Tetratricopeptide-like helical domain containing protein. (Os02t0684000-00)	24288.3	R-LSAAAAAAAGVVGGR-E	00000000000000000	119	133	621.356	2	7.21165	1.85556e-05	1
013-015-B07	Os02g0684500	Similar to Histone H4. (Os02t0684500-00)	11402.4	R-DNIQGITKPAIR-R	00000000000000	25	36	663.384	2	5.45009	0.00111726	3
013-015-B07	Os02g0684500	Similar to Histone H4. (Os02t0684500-00)	11402.4	R-ISGLIYEETR-G	000000000000	47	56	590.818	2	7.11132	0.0314242	3
013-015-B07	Os02g0684500	Similar to Histone H4. (Os02t0684500-00)	11402.4	K-IFLENVIR-D	0000000000	61	68	502.305	2	9.92524	0.00042114	3
013-015-B07	Os02g0684500	Similar to Histone H4. (Os02t0684500-00)	11402.4	R-DAVTYTEHAR-R	000000000000	69	78	581.783	2	8.42668	0.00628569	3
AK119608	Os02g0686400	Similar to Aspartyl-tRNA synthetase (EC 6.1.1.12) (Aspartate--tRNA ligase) (AspRS). (Os02t0686400-01), Similar to Aspartyl-tRNA synthetase (EC 6.1.1.12) (Aspartate--tRNA ligase) (AspRS). (Os02t0686400-02)	61605.5	R-VWTEIGGLDEAAAGR-S	00000000000000000	85	99	772.892	2	4.7264	4.09122e-06	9
AK119608	Os02g0686400	Similar to Aspartyl-tRNA synthetase (EC 6.1.1.12) (Aspartate--tRNA ligase) (AspRS). (Os02t0686400-01), Similar to Aspartyl-tRNA synthetase (EC 6.1.1.12) (Aspartate--tRNA ligase) (AspRS). (Os02t0686400-02)	61605.5	R-GAAQAIRPVSK-K	0000000000000	105	115	549.329	2	6.73458	0.00111239	9
AK119608	Os02g0686400	Similar to Aspartyl-tRNA synthetase (EC 6.1.1.12) (Aspartate--tRNA ligase) (AspRS). (Os02t0686400-01), Similar to Aspartyl-tRNA synthetase (EC 6.1.1.12) (Aspartate--tRNA ligase) (AspRS). (Os02t0686400-02)	61605.5	R-SEAEIEKAEQAGEK-L	0000000000000000	205	218	759.87	2	3.24858	5.30658e-06	9
AK119608	Os02g0686400	Similar to Aspartyl-tRNA synthetase (EC 6.1.1.12) (Aspartate--tRNA ligase) (AspRS). (Os02t0686400-01), Similar to Aspartyl-tRNA synthetase (EC 6.1.1.12) (Aspartate--tRNA ligase) (AspRS). (Os02t0686400-02)	61605.5	K-LIAGSSEGGAAVFK-L	0000000000000000	271	284	653.857	2	4.47499	1.49117e-05	9
AK119608	Os02g0686400	Similar to Aspartyl-tRNA synthetase (EC 6.1.1.12) (Aspartate--tRNA ligase) (AspRS). (Os02t0686400-01), Similar to Aspartyl-tRNA synthetase (EC 6.1.1.12) (Aspartate--tRNA ligase) (AspRS). (Os02t0686400-02)	61605.5	R-VFEVGPVFR-A	00000000000	313	321	525.294	2	3.54182	0.0117754	9
AK119608	Os02g0686400	Similar to Aspartyl-tRNA synthetase (EC 6.1.1.12) (Aspartate--tRNA ligase) (AspRS). (Os02t0686400-01), Similar to Aspartyl-tRNA synthetase (EC 6.1.1.12) (Aspartate--tRNA ligase) (AspRS). (Os02t0686400-02)	61605.5	K-YGTEFFILYR-Y	000000000000	432	441	654.839	2	6.24123	0.000172762	9
AK119608	Os02g0686400	Similar to Aspartyl-tRNA synthetase (EC 6.1.1.12) (Aspartate--tRNA ligase) (AspRS). (Os02t0686400-01), Similar to Aspartyl-tRNA synthetase (EC 6.1.1.12) (Aspartate--tRNA ligase) (AspRS). (Os02t0686400-02)	61605.5	R-GEEIISGAQR-I	000000000000	470	479	530.277	2	4.02997	4.64629e-05	9
AK119608	Os02g0686400	Similar to Aspartyl-tRNA synthetase (EC 6.1.1.12) (Aspartate--tRNA ligase) (AspRS). (Os02t0686400-01), Similar to Aspartyl-tRNA synthetase (EC 6.1.1.12) (Aspartate--tRNA ligase) (AspRS). (Os02t0686400-02)	61605.5	R-IHLPELLTK-R	00000000000	480	488	532.331	2	3.15687	0.00673289	9
AK102917	Os02g0686600	Metal-dependent protein hydrolase family protein. (Os02t0686600-01)	39879.9	R-LTSQFAGADVVR-T	00000000000000	52	63	632.342	2	5.73819	0.0072005	1
AK105916	Os02g0690800	Peptidase M20 family protein. (Os02t0690800-01), Peptidase M20 family protein. (Os02t0690800-02)	49073.2	R-DAVGGLDRDPFVSLLGK-L	0000000000000000000	8	24	879.981	2	8.75872	0.00180635	6
AK105916	Os02g0690800	Peptidase M20 family protein. (Os02t0690800-01), Peptidase M20 family protein. (Os02t0690800-02)	49073.2	R-SNVIVEYPGTVPGR-A	0000000000000000	78	91	744.4	2	4.54595	0.000106748	6
AK105916	Os02g0690800	Peptidase M20 family protein. (Os02t0690800-01), Peptidase M20 family protein. (Os02t0690800-02)	49073.2	R-LGEVKPVLK-H	00000000000	149	157	491.821	2	5.74904	0.000118315	6
AK105916	Os02g0690800	Peptidase M20 family protein. (Os02t0690800-01), Peptidase M20 family protein. (Os02t0690800-02)	49073.2	K-FATPSTIKPTK-W	0000000000000	265	275	595.845	2	4.05978	0.0170614	6
AK105916	Os02g0690800	Peptidase M20 family protein. (Os02t0690800-01), Peptidase M20 family protein. (Os02t0690800-02)	49073.2	R-LTPFYSTTSVVKK-L	000000000000000	298	310	735.917	2	4.37549	0.0169247	6
AK105916	Os02g0690800	Peptidase M20 family protein. (Os02t0690800-01), Peptidase M20 family protein. (Os02t0690800-02)	49073.2	R-ELQDEGFDVQTAGYGLLK-T	00000000000000000000	394	411	991.995	2	5.99852	7.05425e-07	6
AJ495787	Os02g0697300	ENTH/VHS domain containing protein. (Os02t0697300-01)	43792.8	R-LIDDPQTVVNNR-N	00000000000000	134	145	692.366	2	1.61403	3.77871e-07	1
AK121757	Os02g0697600	ATPase, AAA-type, core domain containing protein. (Os02t0697600-01), Similar to ATPase family AAA domain-containing protein 3. (Os02t0697600-02)	71366.3	R-AIEEQIQEER-R	000000000000	204	213	622.812	2	4.26051	0.0216477	4
AK121757	Os02g0697600	ATPase, AAA-type, core domain containing protein. (Os02t0697600-01), Similar to ATPase family AAA domain-containing protein 3. (Os02t0697600-02)	71366.3	R-VVWGYVDR-I	0000000000	313	320	497.263	2	4.23116	0.0186533	4
AK121757	Os02g0697600	ATPase, AAA-type, core domain containing protein. (Os02t0697600-01), Similar to ATPase family AAA domain-containing protein 3. (Os02t0697600-02)	71366.3	R-ILGQPSLIR-E	00000000000	321	329	498.817	2	7.35841	0.0367184	4
AK121757	Os02g0697600	ATPase, AAA-type, core domain containing protein. (Os02t0697600-01), Similar to ATPase family AAA domain-containing protein 3. (Os02t0697600-02)	71366.3	R-SALNALLFR-T	00000000000	482	490	502.8	2	4.20843	0.000168298	4
AK121709	Os02g0699600	Similar to 60S ribosomal protein L12. (Os02t0699600-01)	17847.7	R-VTGGEVGAASSLAPK-I	00000000000000000	17	31	672.367	2	7.69223	1.9656e-05	4
AK121709	Os02g0699600	Similar to 60S ribosomal protein L12. (Os02t0699600-01)	17847.7	K-VSVVPSAAALVIK-A	000000000000000	72	84	627.399	2	6.34445	0.000188509	4
AK121709	Os02g0699600	Similar to 60S ribosomal protein L12. (Os02t0699600-01)	17847.7	K-NIKHSGNISLDDVIEIAR-V	00000000000000000000	98	115	665.364	3	4.9612	0.0027466	4
AK121709	Os02g0699600	Similar to 60S ribosomal protein L12. (Os02t0699600-01)	17847.7	K-HSGNISLDDVIEIAR-V	00000000000000000	101	115	819.934	2	9.51784	1.52417e-05	4
AK070562	Os02g0704900	Similar to Inorganic pyrophosphatase-like protein. (Os02t0704900-01), Similar to Inorganic pyrophosphatase-like protein. (Os02t0704900-02), Similar to Inorganic pyrophosphatase-like protein. (Os02t0704900-03)	24428.4	M-AGEADGKAPLGSR-Y	100000000000000	2	14	635.826	2	5.19482	0.000505738	11
AK070562	Os02g0704900	Similar to Inorganic pyrophosphatase-like protein. (Os02t0704900-01), Similar to Inorganic pyrophosphatase-like protein. (Os02t0704900-02), Similar to Inorganic pyrophosphatase-like protein. (Os02t0704900-03)	24428.4	K-VKYELDKATGLIK-V	000000000000000	63	75	493.295	3	4.83416	0.000542944	11
AK070562	Os02g0704900	Similar to Inorganic pyrophosphatase-like protein. (Os02t0704900-01), Similar to Inorganic pyrophosphatase-like protein. (Os02t0704900-02), Similar to Inorganic pyrophosphatase-like protein. (Os02t0704900-03)	24428.4	K-VKYELDKATGLIKVDR-V	000000000000000000	63	78	924.539	2	6.13711	7.59785e-05	11
AK070562	Os02g0704900	Similar to Inorganic pyrophosphatase-like protein. (Os02t0704900-01), Similar to Inorganic pyrophosphatase-like protein. (Os02t0704900-02), Similar to Inorganic pyrophosphatase-like protein. (Os02t0704900-03)	24428.4	K-YELDKATGLIKVDR-V	0000000000000000	65	78	540.973	3	5.42664	0.0131891	11
AK070562	Os02g0704900	Similar to Inorganic pyrophosphatase-like protein. (Os02t0704900-01), Similar to Inorganic pyrophosphatase-like protein. (Os02t0704900-02), Similar to Inorganic pyrophosphatase-like protein. (Os02t0704900-03)	24428.4	K-ATGLIKVDR-V	00000000000	70	78	486.797	2	2.9766	0.00155346	11
AK070562	Os02g0704900	Similar to Inorganic pyrophosphatase-like protein. (Os02t0704900-01), Similar to Inorganic pyrophosphatase-like protein. (Os02t0704900-02), Similar to Inorganic pyrophosphatase-like protein. (Os02t0704900-03)	24428.4	R-VLYSSVVYPHNYGFIPR-T	0000000000000000000	79	95	671.023	3	5.40021	0.00409399	11
AK070562	Os02g0704900	Similar to Inorganic pyrophosphatase-like protein. (Os02t0704900-01), Similar to Inorganic pyrophosphatase-like protein. (Os02t0704900-02), Similar to Inorganic pyrophosphatase-like protein. (Os02t0704900-03)	24428.4	K-YSMDLYGAYIIESLR-K	00030000000000000	199	213	905.446	2	6.27315	0.0348191	11
AK073092	Os02g0706500	ATPase, AAA-type, core domain containing protein. (Os02t0706500-01), Similar to predicted protein. (Os02t0706500-02)	69320.1	R-ILGQPSLIR-E	00000000000	309	317	498.817	2	7.35841	0.0367184	2
AK073092	Os02g0706500	ATPase, AAA-type, core domain containing protein. (Os02t0706500-01), Similar to predicted protein. (Os02t0706500-02)	69320.1	R-SALNALLFR-T	00000000000	461	469	502.8	2	4.20843	0.000168298	2
AK064357	Os02g0707900	Rossmann-like alpha/beta/alpha sandwich fold domain containing protein. (Os02t0707900-01), Rossmann-like alpha/beta/alpha sandwich fold domain containing protein. (Os02t0707900-02), Hypothetical conserved gene. (Os02t0707900-03)	20288.2	R-VMVAVNESSIK-G	0000000000000	10	20	588.822	2	5.75217	0.00038217	3
AK064357	Os02g0707900	Rossmann-like alpha/beta/alpha sandwich fold domain containing protein. (Os02t0707900-01), Rossmann-like alpha/beta/alpha sandwich fold domain containing protein. (Os02t0707900-02), Hypothetical conserved gene. (Os02t0707900-03)	20288.2	R-VMVAVNESSIK-G	0030000000000	10	20	596.82	2	6.74827	0.0224404	3
AK064357	Os02g0707900	Rossmann-like alpha/beta/alpha sandwich fold domain containing protein. (Os02t0707900-01), Rossmann-like alpha/beta/alpha sandwich fold domain containing protein. (Os02t0707900-02), Hypothetical conserved gene. (Os02t0707900-03)	20288.2	R-VQPDLLVVGSR-G	0000000000000	125	135	591.849	2	5.06379	0.004499	3
AK058999	Os02g0709200	Similar to Histidinol-phosphate aminotransferase, chloroplast precursor (EC 2.6.1.9) (Imidazole acetol-phosphate transaminase). (Os02t0709200-01)	47383.9	R-LPDFSLDVAQIVK-V	000000000000000	201	213	722.911	2	6.49804	0.00742491	1
AK100997	Os02g0710900	Heat shock protein Hsp70 family protein. (Os02t0710900-01)	99451.4	K-VAAVHLAPGR-V	000000000000	44	53	495.798	2	4.76605	7.99772e-06	10
AK100997	Os02g0710900	Heat shock protein Hsp70 family protein. (Os02t0710900-01)	99451.4	R-VPIAVAINEMSK-R	00000000000000	54	65	636.359	2	6.4649	0.0268211	10
AK100997	Os02g0710900	Heat shock protein Hsp70 family protein. (Os02t0710900-01)	99451.4	K-SPALAALADGNR-L	00000000000000	68	79	578.314	2	7.37748	0.000432192	10
AK100997	Os02g0710900	Heat shock protein Hsp70 family protein. (Os02t0710900-01)	99451.4	R-LAGEEASGITAR-H	00000000000000	80	91	587.806	2	-1.01224	8.39884e-06	10
AK100997	Os02g0710900	Heat shock protein Hsp70 family protein. (Os02t0710900-01)	99451.4	R-SVAEALFLPYDLVPDAR-G	0000000000000000000	113	129	938.502	2	6.29194	0.0113067	10
AK100997	Os02g0710900	Heat shock protein Hsp70 family protein. (Os02t0710900-01)	99451.4	K-TVSVNQFQVK-D	000000000000	252	261	575.319	2	3.5111	0.00070291	10
AK100997	Os02g0710900	Heat shock protein Hsp70 family protein. (Os02t0710900-01)	99451.4	K-IDDIYAVELIGGATR-V	00000000000000000	371	385	803.433	2	5.97125	0.00429566	10
AK100997	Os02g0710900	Heat shock protein Hsp70 family protein. (Os02t0710900-01)	99451.4	K-ANLHFSLSR-S	00000000000	530	538	522.786	2	5.27941	0.00522165	10
AK100997	Os02g0710900	Heat shock protein Hsp70 family protein. (Os02t0710900-01)	99451.4	K-SSAPIDESNAQDIVTEK-V	0000000000000000000	601	617	902.437	2	3.85068	0.0025417	10
AK100997	Os02g0710900	Heat shock protein Hsp70 family protein. (Os02t0710900-01)	99451.4	R-VDEVVSEAEKVK-T	00000000000000	782	793	666.36	2	5.75515	0.00646713	10
AK071251	Os02g0713400	Similar to Thioredoxin reductase 1 (EC 1.8.1.9) (NADPH-dependent thioredoxin reductase 1) (NTR 1). (Os02t0713400-01)	35009.7	R-VASDSTTVLADAVVVATGAVAR-R	000000000000000000000000	106	127	1037.07	2	6.85296	0.00287811	4
AK071251	Os02g0713400	Similar to Thioredoxin reductase 1 (EC 1.8.1.9) (NADPH-dependent thioredoxin reductase 1) (NTR 1). (Os02t0713400-01)	35009.7	R-RLHFAGSDAYWNR-G	000000000000000	128	140	531.6	3	8.3603	0.0031685	4
AK071251	Os02g0713400	Similar to Thioredoxin reductase 1 (EC 1.8.1.9) (NADPH-dependent thioredoxin reductase 1) (NTR 1). (Os02t0713400-01)	35009.7	K-GVFAAGDVQDKK-Y	00000000000000	287	298	617.826	2	0.879698	0.00153225	4
AK070279	Os02g0714200	Similar to Pyrophosphate--fructose 6-phosphate 1-phosphotransferase alpha subunit (EC 2.7.1.90) (PFP) (6-phosphofructokinase, pyrophosphate dependent) (Pyrophosphate-dependent 6-phosphofructose-1-kinase) (PPi-PFK). (Os02t0714200-01)	68050.6	K-TANVPDATVISEHPVVR-V	0000000000000000000	72	88	902.986	2	5.03109	0.0006873	2
AK070279	Os02g0714200	Similar to Pyrophosphate--fructose 6-phosphate 1-phosphotransferase alpha subunit (EC 2.7.1.90) (PFP) (6-phosphofructokinase, pyrophosphate dependent) (Pyrophosphate-dependent 6-phosphofructose-1-kinase) (PPi-PFK). (Os02t0714200-01)	68050.6	K-LIGFLGGSDGLLAQK-T	00000000000000000	121	135	744.928	2	4.53064	1.56085e-05	2
013-046-F07	Os02g0715400	Conserved hypothetical protein. (Os02t0715400-00)	10420.1	R-NTDPARDPDEENSAAPADR-A	000000000000000000000	50	68	680.971	3	6.18773	0.000470164	2
013-046-F07	Os02g0715400	Conserved hypothetical protein. (Os02t0715400-00)	10420.1	R-AVEEPAAAAAPVEEGEGK-G	00000000000000000000	69	86	862.927	2	7.77122	0.0032274	2
AK065836	Os02g0717300	Mitochondrial import inner membrane translocase, subunit Tim17/22 family protein. (Os02t0717300-01)	15809.2	M-GLEEDTPVTK-T	000000000000	2	11	544.779	2	2.61482	0.00103219	2
AK065836	Os02g0717300	Mitochondrial import inner membrane translocase, subunit Tim17/22 family protein. (Os02t0717300-01)	15809.2	R-HVALPGLIR-T	00000000000	42	50	488.311	2	5.61527	0.0450157	2
AK121612	Os02g0717400	Tetratricopeptide-like helical domain containing protein. (Os02t0717400-01)	154954	K-ISWNESFHSK-V	000000000000	600	609	617.799	2	4.27971	0.00149854	8
AK121612	Os02g0717400	Tetratricopeptide-like helical domain containing protein. (Os02t0717400-01)	154954	K-VADAPGESNGQLATTAEGPAK-S	00000000000000000000000	697	717	992.491	2	6.79603	1.61079e-06	8
AK121612	Os02g0717400	Tetratricopeptide-like helical domain containing protein. (Os02t0717400-01)	154954	K-LAGSPEEIAADEALVK-K	000000000000000000	770	785	806.929	2	5.15659	0.00172405	8
AK121612	Os02g0717400	Tetratricopeptide-like helical domain containing protein. (Os02t0717400-01)	154954	K-VGSYLLDTVIPK-F	00000000000000	787	798	652.878	2	2.32356	0.0367847	8
AK121612	Os02g0717400	Tetratricopeptide-like helical domain containing protein. (Os02t0717400-01)	154954	R-GLLSSEIIVR-S	000000000000	845	854	543.831	2	3.31721	0.000142421	8
AK121612	Os02g0717400	Tetratricopeptide-like helical domain containing protein. (Os02t0717400-01)	154954	K-YLFEVTDDAK-T	000000000000	954	963	600.796	2	5.78732	0.0153827	8
AK121612	Os02g0717400	Tetratricopeptide-like helical domain containing protein. (Os02t0717400-01)	154954	K-GQQGTNPPANPIELLK-A	000000000000000000	1251	1266	838.954	2	1.928	0.0435876	8
AK121612	Os02g0717400	Tetratricopeptide-like helical domain containing protein. (Os02t0717400-01)	154954	R-SLNAAVVGEGVPR-V	000000000000000	1292	1304	634.857	2	8.08214	0.000544954	8
AK105284	Os02g0717800	Similar to 60S ribosomal protein L31. (Os02t0717800-01)	11180.1	K-APNAIKEIR-K	00000000000	12	20	506.304	2	6.29464	0.00544908	2
AK105284	Os02g0717800	Similar to 60S ribosomal protein L31. (Os02t0717800-01)	11180.1	K-AMGTTDIRIDVK-L	00000000000000	26	37	660.357	2	6.66684	0.0239287	2
AK073448	Os02g0718900	ADP,ATP carrier protein, mitochondrial precursor (ADP/ATP translocase) (Adenine nucleotide translocator) (ANT). (Os02t0718900-01), ADP,ATP carrier protein, mitochondrial precursor (ADP/ATP translocase) (Adenine nucleotide translocator) (ANT). (Os02t0718900-02)	41697.2	K-NFMIDFLMGGVSAAVSK-T	0000000030000000000	81	97	901.954	2	10.3359	0.000123936	21
AK073448	Os02g0718900	ADP,ATP carrier protein, mitochondrial precursor (ADP/ATP translocase) (Adenine nucleotide translocator) (ANT). (Os02t0718900-01), ADP,ATP carrier protein, mitochondrial precursor (ADP/ATP translocase) (Adenine nucleotide translocator) (ANT). (Os02t0718900-02)	41697.2	K-NFMIDFLMGGVSAAVSK-T	0003000030000000000	81	97	909.945	2	2.97051	0.0358863	21
AK073448	Os02g0718900	ADP,ATP carrier protein, mitochondrial precursor (ADP/ATP translocase) (Adenine nucleotide translocator) (ANT). (Os02t0718900-01), ADP,ATP carrier protein, mitochondrial precursor (ADP/ATP translocase) (Adenine nucleotide translocator) (ANT). (Os02t0718900-02)	41697.2	R-VKLLIQNQDEMIK-A	000000000000000	106	118	786.45	2	6.43334	0.00227517	21
AK073448	Os02g0718900	ADP,ATP carrier protein, mitochondrial precursor (ADP/ATP translocase) (Adenine nucleotide translocator) (ANT). (Os02t0718900-01), ADP,ATP carrier protein, mitochondrial precursor (ADP/ATP translocase) (Adenine nucleotide translocator) (ANT). (Os02t0718900-02)	41697.2	R-VKLLIQNQDEMIK-A	000000000003000	106	118	794.446	2	4.88391	0.00331045	21
AK073448	Os02g0718900	ADP,ATP carrier protein, mitochondrial precursor (ADP/ATP translocase) (Adenine nucleotide translocator) (ANT). (Os02t0718900-01), ADP,ATP carrier protein, mitochondrial precursor (ADP/ATP translocase) (Adenine nucleotide translocator) (ANT). (Os02t0718900-02)	41697.2	K-LLIQNQDEMIK-A	0000000003000	108	118	680.865	2	7.07629	4.93305e-05	21
AK073448	Os02g0718900	ADP,ATP carrier protein, mitochondrial precursor (ADP/ATP translocase) (Adenine nucleotide translocator) (ANT). (Os02t0718900-01), ADP,ATP carrier protein, mitochondrial precursor (ADP/ATP translocase) (Adenine nucleotide translocator) (ANT). (Os02t0718900-02)	41697.2	K-LLIQNQDEMIK-A	0000000000000	108	118	672.868	2	6.74352	0.000314592	21
AK073448	Os02g0718900	ADP,ATP carrier protein, mitochondrial precursor (ADP/ATP translocase) (Adenine nucleotide translocator) (ANT). (Os02t0718900-01), ADP,ATP carrier protein, mitochondrial precursor (ADP/ATP translocase) (Adenine nucleotide translocator) (ANT). (Os02t0718900-02)	41697.2	R-TIKDEGFASLWR-G	00000000000000	136	147	711.877	2	6.43861	0.000502058	21
AK073448	Os02g0718900	ADP,ATP carrier protein, mitochondrial precursor (ADP/ATP translocase) (Adenine nucleotide translocator) (ANT). (Os02t0718900-01), ADP,ATP carrier protein, mitochondrial precursor (ADP/ATP translocase) (Adenine nucleotide translocator) (ANT). (Os02t0718900-02)	41697.2	K-DEGFASLWR-G	00000000000	139	147	540.762	2	5.33229	4.23368e-05	21
AK073448	Os02g0718900	ADP,ATP carrier protein, mitochondrial precursor (ADP/ATP translocase) (Adenine nucleotide translocator) (ANT). (Os02t0718900-01), ADP,ATP carrier protein, mitochondrial precursor (ADP/ATP translocase) (Adenine nucleotide translocator) (ANT). (Os02t0718900-02)	41697.2	R-YFPTQALNFAFK-D	00000000000000	156	167	723.878	2	4.30943	1.43495e-05	21
AK073448	Os02g0718900	ADP,ATP carrier protein, mitochondrial precursor (ADP/ATP translocase) (Adenine nucleotide translocator) (ANT). (Os02t0718900-01), ADP,ATP carrier protein, mitochondrial precursor (ADP/ATP translocase) (Adenine nucleotide translocator) (ANT). (Os02t0718900-02)	41697.2	R-QFNGLVDVYR-K	000000000000	229	238	605.818	2	6.15779	6.89919e-05	21
AK073448	Os02g0718900	ADP,ATP carrier protein, mitochondrial precursor (ADP/ATP translocase) (Adenine nucleotide translocator) (ANT). (Os02t0718900-01), ADP,ATP carrier protein, mitochondrial precursor (ADP/ATP translocase) (Adenine nucleotide translocator) (ANT). (Os02t0718900-02)	41697.2	R-QFNGLVDVYRK-T	0000000000000	229	239	669.865	2	4.10904	0.000455336	21
AK073448	Os02g0718900	ADP,ATP carrier protein, mitochondrial precursor (ADP/ATP translocase) (Adenine nucleotide translocator) (ANT). (Os02t0718900-01), ADP,ATP carrier protein, mitochondrial precursor (ADP/ATP translocase) (Adenine nucleotide translocator) (ANT). (Os02t0718900-02)	41697.2	R-QFNGLVDVYRK-T	2000000000000	229	239	661.352	2	5.77604	0.00270394	21
AK073448	Os02g0718900	ADP,ATP carrier protein, mitochondrial precursor (ADP/ATP translocase) (Adenine nucleotide translocator) (ANT). (Os02t0718900-01), ADP,ATP carrier protein, mitochondrial precursor (ADP/ATP translocase) (Adenine nucleotide translocator) (ANT). (Os02t0718900-02)	41697.2	K-TLKSDGIAGLYR-G	00000000000000	240	251	647.366	2	7.16441	0.00610343	21
AK073448	Os02g0718900	ADP,ATP carrier protein, mitochondrial precursor (ADP/ATP translocase) (Adenine nucleotide translocator) (ANT). (Os02t0718900-01), ADP,ATP carrier protein, mitochondrial precursor (ADP/ATP translocase) (Adenine nucleotide translocator) (ANT). (Os02t0718900-02)	41697.2	K-SDGIAGLYR-G	00000000000	243	251	476.251	2	5.4761	0.00104235	21
AK073448	Os02g0718900	ADP,ATP carrier protein, mitochondrial precursor (ADP/ATP translocase) (Adenine nucleotide translocator) (ANT). (Os02t0718900-01), ADP,ATP carrier protein, mitochondrial precursor (ADP/ATP translocase) (Adenine nucleotide translocator) (ANT). (Os02t0718900-02)	41697.2	K-SSMDAFSQILK-N	0003000000000	327	337	621.809	2	6.16909	4.9455e-05	21
AK073448	Os02g0718900	ADP,ATP carrier protein, mitochondrial precursor (ADP/ATP translocase) (Adenine nucleotide translocator) (ANT). (Os02t0718900-01), ADP,ATP carrier protein, mitochondrial precursor (ADP/ATP translocase) (Adenine nucleotide translocator) (ANT). (Os02t0718900-02)	41697.2	K-SSMDAFSQILK-N	0000000000000	327	337	613.812	2	6.59078	0.00337798	21
AK073448	Os02g0718900	ADP,ATP carrier protein, mitochondrial precursor (ADP/ATP translocase) (Adenine nucleotide translocator) (ANT). (Os02t0718900-01), ADP,ATP carrier protein, mitochondrial precursor (ADP/ATP translocase) (Adenine nucleotide translocator) (ANT). (Os02t0718900-02)	41697.2	K-SSMDAFSQILKNEGAK-S	000000000000000000	327	342	863.432	2	5.08784	5.97271e-10	21
AK073448	Os02g0718900	ADP,ATP carrier protein, mitochondrial precursor (ADP/ATP translocase) (Adenine nucleotide translocator) (ANT). (Os02t0718900-01), ADP,ATP carrier protein, mitochondrial precursor (ADP/ATP translocase) (Adenine nucleotide translocator) (ANT). (Os02t0718900-02)	41697.2	K-SSMDAFSQILKNEGAK-S	000300000000000000	327	342	871.43	2	5.58163	0.000117063	21
AK102281	Os02g0720300	Protein-tyrosine phosphatase, dual specificity domain containing protein. (Os02t0720300-01)	30400.6	R-SAAIVIGYLMK-S	0000000000000	134	144	583.34	2	6.74478	8.10376e-06	2
AK102281	Os02g0720300	Protein-tyrosine phosphatase, dual specificity domain containing protein. (Os02t0720300-01)	30400.6	R-LSQSYQWVK-D	00000000000	150	158	569.801	2	4.8438	0.0334591	2
AK121610	Os02g0730000	Similar to Mitochondrial aldehyde dehydrogenase. (Os02t0730000-01), Mitochondrial aldehyde dehydrogenase ALDH2a. (Os02t0730000-02)	59221.5	K-IAQEEIFGPVQSILK-F	00000000000000000	447	461	836.479	2	11.0146	0.00716741	2
AK121868	Os02g0732700	Conserved hypothetical protein. (Os02t0732700-01), Similar to F26F24.8. (Os02t0732700-02), Similar to F26F24.8. (Os02t0732700-03)	183467	R-CLRHALR-T	000000000	442	448	470.264	2	-10.4845	0.00154357	1
AK065796	Os02g0732900	Protein of unknown function DUF794, plant family protein. (Os02t0732900-01)	50778.7	R-ILLINNLK-R	0000000000	155	162	470.815	2	4.42212	0.0122043	1
AK109397	Os02g0735200	Glutamine synthetase shoot isozyme (EC 6.3.1.2) (Glutamate--ammonia ligase) (Clone lambda-GS28). (Os02t0735200-01), Glutamine synthetase shoot isozyme (EC 6.3.1.2) (Glutamate--ammonia ligase) (Clone lambda-GS28). (Os02t0735200-02)	39460.6	R-TLSGPVTDPSKLPK-W	0000000000000000	39	52	720.412	2	3.9297	0.00137437	2
AK109397	Os02g0735200	Glutamine synthetase shoot isozyme (EC 6.3.1.2) (Glutamate--ammonia ligase) (Clone lambda-GS28). (Os02t0735200-01), Glutamine synthetase shoot isozyme (EC 6.3.1.2) (Glutamate--ammonia ligase) (Clone lambda-GS28). (Os02t0735200-02)	39460.6	R-HKEHISAYGEGNER-R	0000000000000000	277	290	813.888	2	4.21127	0.000575804	2
AK065229	Os02g0736400	Aldolase-type TIM barrel domain containing protein. (Os02t0736400-01)	45777.1	R-AFDEGWGGVIAK-T	00000000000000	70	81	625.317	2	4.47453	1.40292e-05	2
AK065229	Os02g0736400	Aldolase-type TIM barrel domain containing protein. (Os02t0736400-01)	45777.1	K-TVSLDAEKVINVTPR-Y	00000000000000000	82	96	547.981	3	6.88771	0.0254196	2
AK062242	Os02g0739600	Similar to Pyruvate dehydrogenase E1 component alpha subunit, mitochondrial precursor (EC 1.2.4.1) (PDHE1-A). (Os02t0739600-01)	43100.8	R-MEIAADSLYK-A	000000000000	73	82	570.787	2	5.22524	0.0235255	5
AK062242	Os02g0739600	Similar to Pyruvate dehydrogenase E1 component alpha subunit, mitochondrial precursor (EC 1.2.4.1) (PDHE1-A). (Os02t0739600-01)	43100.8	R-GGDLVSAFAELMGR-Q	0000000000000000	127	140	711.859	2	3.81536	0.000159979	5
AK062242	Os02g0739600	Similar to Pyruvate dehydrogenase E1 component alpha subunit, mitochondrial precursor (EC 1.2.4.1) (PDHE1-A). (Os02t0739600-01)	43100.8	R-GGDLVSAFAELMGR-Q	0000000000003000	127	140	719.858	2	6.88538	0.00116967	5
AK062242	Os02g0739600	Similar to Pyruvate dehydrogenase E1 component alpha subunit, mitochondrial precursor (EC 1.2.4.1) (PDHE1-A). (Os02t0739600-01)	43100.8	K-GFGVESFGADR-K	0000000000000	372	382	571.271	2	7.04044	0.00873814	5
AK062242	Os02g0739600	Similar to Pyruvate dehydrogenase E1 component alpha subunit, mitochondrial precursor (EC 1.2.4.1) (PDHE1-A). (Os02t0739600-01)	43100.8	K-GFGVESFGADRK-E	00000000000000	372	383	635.317	2	3.07563	1.0948e-05	5
AK064134	Os02g0743800	Hypothetical conserved gene. (Os02t0743800-01), CS domain containing protein. (Os02t0743800-02)	39616.3	R-SDEEVLAAVLAR-K	00000000000000	33	44	636.848	2	7.08489	3.94304e-06	2
AK065736	Os02g0753300	Lipoxygenase, LH2 domain containing protein. (Os02t0753300-01)	20399.1	R-GNLDIFSGR-G	00000000000	108	116	489.756	2	4.82485	0.000114673	1
AK101787	Os02g0753800	Similar to Annexin p35. (Os02t0753800-01)	35816.8	R-AYAEAYGEELLR-A	00000000000000	52	63	692.845	2	6.05908	4.0818e-08	11
AK101787	Os02g0753800	Similar to Annexin p35. (Os02t0753800-01)	35816.8	R-ALNDEIHGKFER-A	00000000000000	64	75	714.872	2	9.54716	0.00205359	11
AK101787	Os02g0753800	Similar to Annexin p35. (Os02t0753800-01)	35816.8	R-DAVLANEEAR-K	000000000000	88	97	544.276	2	6.47649	0.0055345	11
AK101787	Os02g0753800	Similar to Annexin p35. (Os02t0753800-01)	35816.8	R-SLEEDVAAHITGDYR-K	00000000000000000	132	146	838.404	2	5.44845	1.77743e-05	11
AK101787	Os02g0753800	Similar to Annexin p35. (Os02t0753800-01)	35816.8	R-SLEEDVAAHITGDYRK-L	000000000000000000	132	147	601.972	3	7.68807	0.01024	11
AK101787	Os02g0753800	Similar to Annexin p35. (Os02t0753800-01)	35816.8	R-KLLVPLVTVYR-Y	0000000000000	147	157	650.927	2	8.16759	0.00131239	11
AK101787	Os02g0753800	Similar to Annexin p35. (Os02t0753800-01)	35816.8	K-IHDKAYSDDEIIR-I	000000000000000	179	191	787.898	2	4.7614	0.000512902	11
AK101787	Os02g0753800	Similar to Annexin p35. (Os02t0753800-01)	35816.8	K-ADPKDEFLGTLR-A	00000000000000	222	233	681.36	2	5.04799	0.03941	11
AK101787	Os02g0753800	Similar to Annexin p35. (Os02t0753800-01)	35816.8	R-LALGGMGTDENSLTR-I	00000030000000000	252	266	775.883	2	6.89021	9.43717e-07	11
AK101787	Os02g0753800	Similar to Annexin p35. (Os02t0753800-01)	35816.8	R-LALGGMGTDENSLTR-I	00000000000000000	252	266	767.887	2	9.05797	0.00236493	11
AK101787	Os02g0753800	Similar to Annexin p35. (Os02t0753800-01)	35816.8	K-RNSVPLER-A	0000000000	286	293	485.778	2	6.10876	0.0273353	11
AK105696	Os02g0754500	Tetratricopeptide-like helical domain containing protein. (Os02t0754500-01)	67138.9	R-VGDVLLPAATGGLTQTR-Q	0000000000000000000	236	252	834.97	2	3.12227	0.0138829	3
AK105696	Os02g0754500	Tetratricopeptide-like helical domain containing protein. (Os02t0754500-01)	67138.9	R-AAAYLELGR-Y	00000000000	538	546	482.269	2	4.65923	0.00403347	3
AK105696	Os02g0754500	Tetratricopeptide-like helical domain containing protein. (Os02t0754500-01)	67138.9	R-HALALEPQNK-A	000000000000	590	599	560.81	2	2.37692	0.00385618	3
AK061269	Os02g0757900	Similar to Poly(A)-binding protein II-like. (Os02t0757900-01), Similar to Polyadenylate-binding protein 2. (Os02t0757900-02)	24210.6	R-VTILTDKFGQPK-G	00000000000000	115	126	673.891	2	5.64557	0.00132212	1
AK064389	Os02g0758000	Similar to Low molecular weight heat shock protein precursor (Mitochondrial small heat shock protein 22). (Os02t0758000-01)	24082.4	R-AYNTGAQLR-R	00000000000	43	51	497.262	2	4.6917	0.0283322	1
AK064389	Os02g0758000	Similar to Low molecular weight heat shock protein precursor (Mitochondrial small heat shock protein 22). (Os02t0758000-01)	24082.4	K-GEGEKEAGEDEGAAPAR-Y	0000000000000000000	157	173	558.255	3	5.85157	0.020308	1
AK063850	Os02g0760300	Similar to Immunophilin. (Os02t0760300-01)	12220.1	K-DAGQEPFSFNIGQGSVIK-G	00000000000000000000	44	61	947.477	2	6.76481	0.00161459	1
AK070404	Os02g0761100	Similar to Cyclophilin-40 (Expressed protein). (Os02t0761100-01)	44351.1	R-IVVELYASVAPR-T	00000000000000	49	60	658.885	2	4.17296	0.0156713	2
AK070404	Os02g0761100	Similar to Cyclophilin-40 (Expressed protein). (Os02t0761100-01)	44351.1	K-GALLDADFALR-E	0000000000000	311	321	581.32	2	6.32181	0.00116063	2
AK073828	Os02g0761200	Armadillo-like helical domain containing protein. (Os02t0761200-01)	49811.4	R-VVASQVYGYSR-R	0000000000000	239	249	614.825	2	8.19908	0.00934971	1
AK059956	Os02g0761900	Dimethylmenaquinone methyltransferase family protein. (Os02t0761900-01), Dimethylmenaquinone methyltransferase family protein. (Os02t0761900-02)	18393.5	R-ALQPVFQVYGR-R	0000000000000	26	36	639.357	2	5.56653	0.000825987	2
AK059956	Os02g0761900	Dimethylmenaquinone methyltransferase family protein. (Os02t0761900-01), Dimethylmenaquinone methyltransferase family protein. (Os02t0761900-02)	18393.5	R-RQVFAGPIVTLK-V	00000000000000	37	48	664.909	2	3.9261	0.0167647	2
Os02g0765800	Os02g0765800	Short-chain dehydrogenase/reductase SDR domain containing protein. (Os02t0765800-00)	13241.1	K-FTPDIFPKPSKL--	00000000000000	111	122	695.395	2	4.28677	0.0208313	1
AK072062	Os02g0766700	Similar to Abscisic acid responsive elements-binding factor (ABA-responsive element binding protein 2) (AREB2). (Os02t0766700-01)	38217.5	K-LKELNDELQK-K	000000000000	310	319	615.333	2	-11.6417	0.00772628	2
AK069611	Os02g0767500	Mitochondrial phosphate transporter. (Os02t0767500-01)	39431.3	K-SITSGFGVLLK-E	0000000000000	106	116	561.336	2	7.43939	0.0355085	5
AK069611	Os02g0767500	Mitochondrial phosphate transporter. (Os02t0767500-01)	39431.3	K-YYSDIAGPEYAQK-Y	000000000000000	151	163	752.854	2	3.2058	0.000579429	5
AK069611	Os02g0767500	Mitochondrial phosphate transporter. (Os02t0767500-01)	39431.3	R-VQTQPGFAR-G	00000000000	194	202	502.274	2	7.90306	0.0152808	5
AK069611	Os02g0767500	Mitochondrial phosphate transporter. (Os02t0767500-01)	39431.3	R-SEGALGLYK-G	00000000000	214	222	469.257	2	7.46393	4.49874e-05	5
AK069611	Os02g0767500	Mitochondrial phosphate transporter. (Os02t0767500-01)	39431.3	K-GATVGDAVKK-L	000000000000	300	309	473.274	2	5.52428	0.008471	5
AK071237	Os02g0767700	YbaK/aminoacyl-tRNA synthetase associated region domain containing protein. (Os02t0767700-01)	35177.4	M-GYTKEQLLAR-L	000000000000	2	11	589.833	2	4.74287	0.0135241	1
AK070007	Os02g0768200	emp24/gp25L/p24 family protein. (Os02t0768200-01), Similar to transmembrane emp24 domain-containing protein 10. (Os02t0768200-02)	24131.5	K-EKIEGVELELR-K	0000000000000	142	152	657.872	2	8.01676	0.0131966	2
AK070007	Os02g0768200	emp24/gp25L/p24 family protein. (Os02t0768200-01), Similar to transmembrane emp24 domain-containing protein 10. (Os02t0768200-02)	24131.5	K-IEGVELELR-K	00000000000	144	152	529.301	2	6.13167	0.000218876	2
AK060304	Os02g0768600	Similar to Chloroplast inorganic pyrophosphatase (EC 3.6.1.1). (Os02t0768600-01), Similar to Inorganic pyrophosphatase. (Os02t0768600-02)	33051.1	R-VLATTALLR-T	00000000000	47	55	479.312	2	7.44401	0.0205277	3
AK060304	Os02g0768600	Similar to Chloroplast inorganic pyrophosphatase (EC 3.6.1.1). (Os02t0768600-01), Similar to Inorganic pyrophosphatase. (Os02t0768600-02)	33051.1	R-VFLVDGGGRK-V	000000000000	74	83	524.306	2	9.50972	0.00283558	3
AK060304	Os02g0768600	Similar to Chloroplast inorganic pyrophosphatase (EC 3.6.1.1). (Os02t0768600-01), Similar to Inorganic pyrophosphatase. (Os02t0768600-02)	33051.1	K-VIEETNESWEK-L	0000000000000	270	280	682.327	2	6.29684	0.00598536	3
AK103425	Os02g0770000	Beta 1 subunit of 20S proteasome. (Os02t0770000-01), Beta 1 subunit of 20S proteasome. (Os02t0770000-02)	26399.2	R-TSTGMYVANR-A	000000000000	45	54	550.268	2	7.21558	3.09941e-05	5
AK103425	Os02g0770000	Beta 1 subunit of 20S proteasome. (Os02t0770000-01), Beta 1 subunit of 20S proteasome. (Os02t0770000-02)	26399.2	R-YFLHQHTIQLGQPATVK-V	0000000000000000000	86	102	661.031	3	6.67946	0.010867	5
AK103425	Os02g0770000	Beta 1 subunit of 20S proteasome. (Os02t0770000-01), Beta 1 subunit of 20S proteasome. (Os02t0770000-02)	26399.2	K-YEGGQIFSVPLGGTILR-Q	0000000000000000000	131	147	903.999	2	9.20244	0.0139402	5
AK103425	Os02g0770000	Beta 1 subunit of 20S proteasome. (Os02t0770000-01), Beta 1 subunit of 20S proteasome. (Os02t0770000-02)	26399.2	R-TVTINADGVSR-K	0000000000000	201	211	566.806	2	8.02656	0.000898568	5
AK065228	Os02g0774300	Similar to Heat shock 70 kDa protein, mitochondrial precursor. (Os02t0774300-01), Similar to heat shock 70 kDa protein. (Os02t0774300-02)	73136.8	R-TTPSVVAFNQK-G	0000000000000	85	95	596.324	2	3.22056	0.00176806	24
AK065228	Os02g0774300	Similar to Heat shock 70 kDa protein, mitochondrial precursor. (Os02t0774300-01), Similar to heat shock 70 kDa protein. (Os02t0774300-02)	73136.8	R-TTPSVVAFNQKGER-L	0000000000000000	85	98	767.411	2	8.07911	0.00153433	24
AK065228	Os02g0774300	Similar to Heat shock 70 kDa protein, mitochondrial precursor. (Os02t0774300-01), Similar to heat shock 70 kDa protein. (Os02t0774300-02)	73136.8	K-QYSPSQIGAFVLTK-M	0000000000000000	160	173	769.919	2	6.43379	1.70348e-05	24
AK065228	Os02g0774300	Similar to Heat shock 70 kDa protein, mitochondrial precursor. (Os02t0774300-01), Similar to heat shock 70 kDa protein. (Os02t0774300-02)	73136.8	K-MKETAESYLGK-T	0000000000000	174	184	628.819	2	8.83164	0.00014901	24
AK065228	Os02g0774300	Similar to Heat shock 70 kDa protein, mitochondrial precursor. (Os02t0774300-01), Similar to heat shock 70 kDa protein. (Os02t0774300-02)	73136.8	K-MKETAESYLGK-T	0300000000000	174	184	636.815	2	6.19333	0.00131798	24
AK065228	Os02g0774300	Similar to Heat shock 70 kDa protein, mitochondrial precursor. (Os02t0774300-01), Similar to heat shock 70 kDa protein. (Os02t0774300-02)	73136.8	R-IINEPTAAALSYGTNNK-E	0000000000000000000	219	235	888.965	2	5.44116	8.19331e-06	24
AK065228	Os02g0774300	Similar to Heat shock 70 kDa protein, mitochondrial precursor. (Os02t0774300-01), Similar to heat shock 70 kDa protein. (Os02t0774300-02)	73136.8	R-SEAIDLAKDR-L	000000000000	292	301	559.299	2	5.14841	6.18838e-05	24
AK065228	Os02g0774300	Similar to Heat shock 70 kDa protein, mitochondrial precursor. (Os02t0774300-01), Similar to heat shock 70 kDa protein. (Os02t0774300-02)	73136.8	K-HLNITLTR-S	0000000000	340	347	484.29	2	3.85926	0.0152992	24
AK065228	Os02g0774300	Similar to Heat shock 70 kDa protein, mitochondrial precursor. (Os02t0774300-01), Similar to heat shock 70 kDa protein. (Os02t0774300-02)	73136.8	K-FESLVNSLIER-T	0000000000000	350	360	653.858	2	7.00993	0.0388147	24
AK065228	Os02g0774300	Similar to Heat shock 70 kDa protein, mitochondrial precursor. (Os02t0774300-01), Similar to heat shock 70 kDa protein. (Os02t0774300-02)	73136.8	K-EVDEVLLVGGMTR-V	000000000003000	378	390	717.372	2	4.37569	0.00173549	24
AK065228	Os02g0774300	Similar to Heat shock 70 kDa protein, mitochondrial precursor. (Os02t0774300-01), Similar to heat shock 70 kDa protein. (Os02t0774300-02)	73136.8	K-VQEIVSEIFGK-S	0000000000000	394	404	624.849	2	5.74619	0.00090744	24
AK065228	Os02g0774300	Similar to Heat shock 70 kDa protein, mitochondrial precursor. (Os02t0774300-01), Similar to heat shock 70 kDa protein. (Os02t0774300-02)	73136.8	K-GVNPDEAVAMGAAIQGGILR-G	0000000000000000000000	409	428	970.011	2	4.38397	7.97006e-10	24
AK065228	Os02g0774300	Similar to Heat shock 70 kDa protein, mitochondrial precursor. (Os02t0774300-01), Similar to heat shock 70 kDa protein. (Os02t0774300-02)	73136.8	K-GVNPDEAVAMGAAIQGGILR-G	0000000000300000000000	409	428	978.01	2	6.26067	7.09176e-07	24
AK065228	Os02g0774300	Similar to Heat shock 70 kDa protein, mitochondrial precursor. (Os02t0774300-01), Similar to heat shock 70 kDa protein. (Os02t0774300-02)	73136.8	K-SQVFSTAADNQTQVGIR-V	0000000000000000000	468	484	911.462	2	4.01827	6.62915e-08	24
AK065228	Os02g0774300	Similar to Heat shock 70 kDa protein, mitochondrial precursor. (Os02t0774300-01), Similar to heat shock 70 kDa protein. (Os02t0774300-02)	73136.8	R-VLQGEREMATDNK-L	000000000000000	485	497	745.872	2	6.94556	0.000689071	24
AK065228	Os02g0774300	Similar to Heat shock 70 kDa protein, mitochondrial precursor. (Os02t0774300-01), Similar to heat shock 70 kDa protein. (Os02t0774300-02)	73136.8	K-DKSTGKEQQITIR-S	000000000000000	535	547	752.415	2	6.33693	0.00882866	24
AK065228	Os02g0774300	Similar to Heat shock 70 kDa protein, mitochondrial precursor. (Os02t0774300-01), Similar to heat shock 70 kDa protein. (Os02t0774300-02)	73136.8	K-STGKEQQITIR-S	0000000000000	537	547	630.852	2	4.3259	0.00837811	24
AK065228	Os02g0774300	Similar to Heat shock 70 kDa protein, mitochondrial precursor. (Os02t0774300-01), Similar to heat shock 70 kDa protein. (Os02t0774300-02)	73136.8	K-MVQEAELHSQKDQER-K	00000000000000000	560	574	914.442	2	6.43562	0.00253887	24
AK065228	Os02g0774300	Similar to Heat shock 70 kDa protein, mitochondrial precursor. (Os02t0774300-01), Similar to heat shock 70 kDa protein. (Os02t0774300-02)	73136.8	R-NNADTTIYSVEK-S	00000000000000	582	593	677.833	2	7.20163	8.54524e-05	24
AK065228	Os02g0774300	Similar to Heat shock 70 kDa protein, mitochondrial precursor. (Os02t0774300-01), Similar to heat shock 70 kDa protein. (Os02t0774300-02)	73136.8	R-SVMTSDDIEKIK-A	00000000000000	619	630	683.353	2	4.58987	0.00942652	24
AK065228	Os02g0774300	Similar to Heat shock 70 kDa protein, mitochondrial precursor. (Os02t0774300-01), Similar to heat shock 70 kDa protein. (Os02t0774300-02)	73136.8	R-SVMTSDDIEKIKANIEAANK-A	0003000000000000000000	619	638	731.712	3	6.77908	0.003487	24
AK065228	Os02g0774300	Similar to Heat shock 70 kDa protein, mitochondrial precursor. (Os02t0774300-01), Similar to heat shock 70 kDa protein. (Os02t0774300-02)	73136.8	K-IGQHMSGGGGGAGGSETGGSQGGGEQAPEAEYEEVK-K	00000000000000000000000000000000000000	643	678	1121.49	3	6.65124	0.0396337	24
AK065228	Os02g0774300	Similar to Heat shock 70 kDa protein, mitochondrial precursor. (Os02t0774300-01), Similar to heat shock 70 kDa protein. (Os02t0774300-02)	73136.8	K-IGQHMSGGGGGAGGSETGGSQGGGEQAPEAEYEEVKK--	000000000000000000000000000000000000000	643	679	873.395	4	4.39836	5.06072e-06	24
AK069984	Os02g0775200	Similar to Activator 1 36 kDa subunit (Replication factor C 36 kDa subunit) (A1 36 kDa subunit) (RF-C 36 kDa subunit) (RFC36) (Replication factor C subunit 5). (Os02t0775200-01)	39955.8	R-QQIQDFASAR-S	000000000000	120	129	582.292	2	-3.74898	0.000454301	1
AK121728	Os02g0779200	Similar to Subtilisin-like protease (Fragment). (Os02t0779200-01), Similar to Subtilisin protease (Fragment). (Os02t0779200-02)	81500.2	R-DSIAIGSFHAVSK-G	000000000000000	307	319	666.355	2	5.65614	0.00326725	3
AK121728	Os02g0779200	Similar to Subtilisin-like protease (Fragment). (Os02t0779200-01), Similar to Subtilisin protease (Fragment). (Os02t0779200-02)	81500.2	K-YYVQSDPSPTATIVFR-G	000000000000000000	470	485	922.477	2	12.654	0.0161516	3
AK121728	Os02g0779200	Similar to Subtilisin-like protease (Fragment). (Os02t0779200-01), Similar to Subtilisin protease (Fragment). (Os02t0779200-02)	81500.2	R-NVGSNANAVYEAK-I	000000000000000	695	707	668.832	2	5.35785	0.00505257	3
AK073762	Os02g0781400	Similar to 20 kDa chaperonin, chloroplast precursor (Protein Cpn21) (Chloroplast protein Cpn10) (Chloroplast chaperonin 10) (Ch-CPN10). (Os02t0781400-01), Similar to 20 kDa chaperonin, chloroplast precursor (Protein Cpn21) (Chloroplast protein Cpn10) (Chloroplast chaperonin 10) (Ch-CPN10). (Os02t0781400-02), Similar to Chaperonin. (Os02t0781400-03)	26546.2	K-TTGGILLPSAAQSKPQGGEVVAIGEGR-T	00000000000000000000000000000	82	108	865.142	3	6.3924	1.20551e-05	4
AK073762	Os02g0781400	Similar to 20 kDa chaperonin, chloroplast precursor (Protein Cpn21) (Chloroplast protein Cpn10) (Chloroplast chaperonin 10) (Ch-CPN10). (Os02t0781400-01), Similar to 20 kDa chaperonin, chloroplast precursor (Protein Cpn21) (Chloroplast protein Cpn10) (Chloroplast chaperonin 10) (Ch-CPN10). (Os02t0781400-02), Similar to Chaperonin. (Os02t0781400-03)	26546.2	R-IPLSVSAGSTVLYSK-Y	00000000000000000	214	228	761.435	2	6.37415	3.43095e-07	4
AK073762	Os02g0781400	Similar to 20 kDa chaperonin, chloroplast precursor (Protein Cpn21) (Chloroplast protein Cpn10) (Chloroplast chaperonin 10) (Ch-CPN10). (Os02t0781400-01), Similar to 20 kDa chaperonin, chloroplast precursor (Protein Cpn21) (Chloroplast protein Cpn10) (Chloroplast chaperonin 10) (Ch-CPN10). (Os02t0781400-02), Similar to Chaperonin. (Os02t0781400-03)	26546.2	K-YAGSEFKGSDGTSYIVLR-V	00000000000000000000	229	246	650.663	3	7.55793	0.0487562	4
AK073762	Os02g0781400	Similar to 20 kDa chaperonin, chloroplast precursor (Protein Cpn21) (Chloroplast protein Cpn10) (Chloroplast chaperonin 10) (Ch-CPN10). (Os02t0781400-01), Similar to 20 kDa chaperonin, chloroplast precursor (Protein Cpn21) (Chloroplast protein Cpn10) (Chloroplast chaperonin 10) (Ch-CPN10). (Os02t0781400-02), Similar to Chaperonin. (Os02t0781400-03)	26546.2	K-GSDGTSYIVLR-V	0000000000000	236	246	584.309	2	8.84207	0.000933512	4
AB070252	Os02g0784700	Similar to 26S protease regulatory subunit 7 (Fragment). (Os02t0784700-00)	26639.8	R-VIGSELVQK-Y	00000000000	42	50	486.792	2	4.91791	0.0434148	3
AB070252	Os02g0784700	Similar to 26S protease regulatory subunit 7 (Fragment). (Os02t0784700-00)	26639.8	R-FDDGVGGDNEVQR-T	000000000000000	87	99	704.314	2	5.04463	1.57981e-07	3
AB070252	Os02g0784700	Similar to 26S protease regulatory subunit 7 (Fragment). (Os02t0784700-00)	26639.8	R-TMLEIVNQLDGFDAR-G	00000000000000000	100	114	861.434	2	4.6173	1.14882e-05	3
AK121768	Os02g0785800	Similar to Ribosomal protein L35A. (Os02t0785800-01), Similar to Ribosomal protein L35A. (Os02t0785800-02)	12848.8	R-GTILGYKR-S	0000000000	16	23	454.275	2	6.62705	0.00493378	4
AK121768	Os02g0785800	Similar to Ribosomal protein L35A. (Os02t0785800-01), Similar to Ribosomal protein L35A. (Os02t0785800-02)	12848.8	K-SNQYENTSLVQIEGVNTK-E	00000000000000000000	26	43	1012.5	2	4.16492	1.76617e-05	4
AK121768	Os02g0785800	Similar to Ribosomal protein L35A. (Os02t0785800-01), Similar to Ribosomal protein L35A. (Os02t0785800-02)	12848.8	K-VTRPHGNSGVVR-A	00000000000000	76	87	639.859	2	6.11541	0.011171	4
AK103497	Os02g0788400	Similar to Eukaryotic translation initiation factor 3 subunit-like protein. (Os02t0788400-01)	32202.4	R-VVSGPDENGFKK-V	00000000000000	31	42	638.834	2	6.43985	0.0484682	5
AK103497	Os02g0788400	Similar to Eukaryotic translation initiation factor 3 subunit-like protein. (Os02t0788400-01)	32202.4	K-FGDAVQEDVGAR-L	00000000000000	84	95	632.308	2	9.50961	0.00150044	5
AK103497	Os02g0788400	Similar to Eukaryotic translation initiation factor 3 subunit-like protein. (Os02t0788400-01)	32202.4	K-AEEPSASGDPLASK-S	0000000000000000	116	129	679.831	2	7.61955	0.032878	5
AK103497	Os02g0788400	Similar to Eukaryotic translation initiation factor 3 subunit-like protein. (Os02t0788400-01)	32202.4	K-LNGYGYDNLILR-V	00000000000000	269	280	705.878	2	7.4673	0.0196265	5
AK100050	Os02g0790500	Hypothetical conserved gene. (Os02t0790500-01), Glycosyl transferase, family 20 domain containing protein. (Os02t0790500-02), Similar to trehalose-6-phosphate synthase. (Os02t0790500-03)	51047.8	R-AVLVQIANPAR-S	0000000000000	63	73	576.351	2	4.44868	0.00050523	1
AK072317	Os02g0793300	Similar to Nudix hydrolase 3 (EC 3.6.1.-) (AtNUDT3). Splice isoform 2. (Os02t0793300-01)	88170.1	K-YATGFFTVIK-R	000000000000	353	362	573.819	2	9.08127	0.0325776	5
AK072317	Os02g0793300	Similar to Nudix hydrolase 3 (EC 3.6.1.-) (AtNUDT3). Splice isoform 2. (Os02t0793300-01)	88170.1	K-SDNVSAAPIR-V	000000000000	507	516	515.273	2	6.33936	0.000767086	5
AK072317	Os02g0793300	Similar to Nudix hydrolase 3 (EC 3.6.1.-) (AtNUDT3). Splice isoform 2. (Os02t0793300-01)	88170.1	R-VINLLYNSGDVK-G	00000000000000	517	528	667.869	2	-0.871429	9.21179e-05	5
AK072317	Os02g0793300	Similar to Nudix hydrolase 3 (EC 3.6.1.-) (AtNUDT3). Splice isoform 2. (Os02t0793300-01)	88170.1	R-FGLEEAHGK-G	00000000000	670	678	494.25	2	3.47597	0.00144224	5
AK072317	Os02g0793300	Similar to Nudix hydrolase 3 (EC 3.6.1.-) (AtNUDT3). Splice isoform 2. (Os02t0793300-01)	88170.1	K-GDKPAAQSLLQSHASLTQPLR-V	00000000000000000000000	726	746	740.074	3	6.75518	0.0401177	5
AK062552	Os02g0793700	Similar to Membrane steroid-binding protein 1. (Os02t0793700-01), Cytochrome b5 domain containing protein. (Os02t0793700-02)	10819.4	M-AAELTAAQLR-A	100000000000	2	11	543.304	2	5.39017	3.54256e-06	5
AK062552	Os02g0793700	Similar to Membrane steroid-binding protein 1. (Os02t0793700-01), Cytochrome b5 domain containing protein. (Os02t0793700-02)	10819.4	R-AYDGSDPSKPIYVSVR-G	000000000000000000	12	27	877.45	2	9.67121	0.0283102	5
AK062552	Os02g0793700	Similar to Membrane steroid-binding protein 1. (Os02t0793700-01), Cytochrome b5 domain containing protein. (Os02t0793700-02)	10819.4	R-GKVYDVTSGR-G	000000000000	28	37	541.288	2	5.06846	0.000691443	5
AK062552	Os02g0793700	Similar to Membrane steroid-binding protein 1. (Os02t0793700-01), Cytochrome b5 domain containing protein. (Os02t0793700-02)	10819.4	R-GFYGPGGAYAVFAGR-E	00000000000000000	38	52	745.373	2	10.6765	0.00014098	5
AK058513	Os02g0794700	Similar to Cytosol aminopeptidase (EC 3.4.11.1) (Leucine aminopeptidase) (LAP) (Leucyl aminopeptidase) (Proline aminopeptidase) (EC 3.4.11.5) (Prolyl aminopeptidase). (Os02t0794700-01), Similar to Leucine aminopeptidase (Cytosol aminopeptidase) (Fragment). (Os02t0794700-02)	33591	K-TIEVNNTDAEGR-L	00000000000000	163	174	659.819	2	6.11531	1.23516e-05	1
AK121272	Os02g0797300	Similar to Plasma membrane H+-ATPase (EC 3.6.1.3). (Os02t0797300-01)	103956	K-MITGDQLAIGK-E	0300000000000	504	514	581.813	2	3.62144	0.00377188	3
AK121272	Os02g0797300	Similar to Plasma membrane H+-ATPase (EC 3.6.1.3). (Os02t0797300-01)	103956	K-MITGDQLAIGK-E	0000000000000	504	514	573.818	2	9.45682	0.0309685	3
AK121272	Os02g0797300	Similar to Plasma membrane H+-ATPase (EC 3.6.1.3). (Os02t0797300-01)	103956	K-ADGFAGVFPEHKYEIVK-R	0000000000000000000	552	568	636.329	3	1.18283	0.0136178	3
AK072426	Os02g0797500	Similar to Plastidic aspartate aminotransferase. (Os02t0797500-01), Similar to Plastidic aspartate aminotransferase. (Os02t0797500-02)	50602.8	K-EYLPIEGLAAFNK-A	000000000000000	120	132	732.893	2	3.55918	0.0110855	8
AK072426	Os02g0797500	Similar to Plastidic aspartate aminotransferase. (Os02t0797500-01), Similar to Plastidic aspartate aminotransferase. (Os02t0797500-02)	50602.8	R-VATLQSLSGTGSLR-L	0000000000000000	151	164	695.392	2	5.7694	7.44686e-09	8
AK072426	Os02g0797500	Similar to Plastidic aspartate aminotransferase. (Os02t0797500-01), Similar to Plastidic aspartate aminotransferase. (Os02t0797500-02)	50602.8	K-VLISSPTWGNHK-N	00000000000000	179	190	669.865	2	4.21354	0.00154856	8
AK072426	Os02g0797500	Similar to Plastidic aspartate aminotransferase. (Os02t0797500-01), Similar to Plastidic aspartate aminotransferase. (Os02t0797500-02)	50602.8	K-VPWSEYR-Y	000000000	198	204	468.735	2	5.67912	0.00733536	8
AK072426	Os02g0797500	Similar to Plastidic aspartate aminotransferase. (Os02t0797500-01), Similar to Plastidic aspartate aminotransferase. (Os02t0797500-02)	50602.8	K-IADVIQEKK-H	00000000000	253	261	522.311	2	4.12973	0.00888461	8
AK072426	Os02g0797500	Similar to Plastidic aspartate aminotransferase. (Os02t0797500-01), Similar to Plastidic aspartate aminotransferase. (Os02t0797500-02)	50602.8	R-GLEVFVAQSYSK-N	00000000000000	292	303	664.349	2	1.39008	0.000826794	8
AK072426	Os02g0797500	Similar to Plastidic aspartate aminotransferase. (Os02t0797500-01), Similar to Plastidic aspartate aminotransferase. (Os02t0797500-02)	50602.8	K-NLGLYAER-I	0000000000	304	311	468.253	2	4.06832	0.00773129	8
AK072426	Os02g0797500	Similar to Plastidic aspartate aminotransferase. (Os02t0797500-01), Similar to Plastidic aspartate aminotransferase. (Os02t0797500-02)	50602.8	R-QIGMFSYTGLNK-T	00000000000000	402	413	679.846	2	4.85037	7.7477e-05	8
AK102146	Os02g0802500	Similar to H(+)-translocating (Pyrophosphate-ENERGIZED) inorganic pyrophosphatase beta-1 polypeptide (EC 3.6.1.1) (Fragment). (Os02t0802500-01), Similar to Proton translocating pyrophosphatase. (Os02t0802500-02)	80509.8	K-AADVGADLVGKVER-N	0000000000000000	247	260	700.384	2	5.31066	1.18587e-07	5
AK102146	Os02g0802500	Similar to H(+)-translocating (Pyrophosphate-ENERGIZED) inorganic pyrophosphatase beta-1 polypeptide (EC 3.6.1.1) (Fragment). (Os02t0802500-01), Similar to Proton translocating pyrophosphatase. (Os02t0802500-02)	80509.8	R-TDALDAAGNTTAAIGK-G	000000000000000000	522	537	745.381	2	4.05095	0.0262486	5
AK102146	Os02g0802500	Similar to H(+)-translocating (Pyrophosphate-ENERGIZED) inorganic pyrophosphatase beta-1 polypeptide (EC 3.6.1.1) (Fragment). (Os02t0802500-01), Similar to Proton translocating pyrophosphatase. (Os02t0802500-02)	80509.8	K-KYIEAGASEHAR-S	00000000000000	691	702	666.343	2	6.14549	0.00659168	5
AK102146	Os02g0802500	Similar to H(+)-translocating (Pyrophosphate-ENERGIZED) inorganic pyrophosphatase beta-1 polypeptide (EC 3.6.1.1) (Fragment). (Os02t0802500-01), Similar to Proton translocating pyrophosphatase. (Os02t0802500-02)	80509.8	K-YIEAGASEHAR-S	0000000000000	692	702	602.294	2	4.35419	0.0377234	5
AK101474	Os02g0803700	Similar to 26S protease regulatory subunit 6A homolog (TAT-binding protein homolog 1) (TBP-1). (Os02t0803700-01), Similar to 26S protease regulatory subunit 6A homolog (TAT-binding protein homolog 1) (TBP-1). (Os02t0803700-02), Similar to 26S protease regulatory subunit 6A homolog. (Os02t0803700-03)	48051.8	R-VLKDELQR-T	0000000000	43	50	500.793	2	-0.125801	0.00412236	8
AK101474	Os02g0803700	Similar to 26S protease regulatory subunit 6A homolog (TAT-binding protein homolog 1) (TBP-1). (Os02t0803700-01), Similar to 26S protease regulatory subunit 6A homolog (TAT-binding protein homolog 1) (TBP-1). (Os02t0803700-02), Similar to 26S protease regulatory subunit 6A homolog. (Os02t0803700-03)	48051.8	R-TNLEVESYKEK-I	0000000000000	51	61	670.345	2	5.94918	0.00279923	8
AK101474	Os02g0803700	Similar to 26S protease regulatory subunit 6A homolog (TAT-binding protein homolog 1) (TBP-1). (Os02t0803700-01), Similar to 26S protease regulatory subunit 6A homolog (TAT-binding protein homolog 1) (TBP-1). (Os02t0803700-02), Similar to 26S protease regulatory subunit 6A homolog. (Os02t0803700-03)	48051.8	K-GVLLYGPPGTGK-T	00000000000000	212	223	579.833	2	6.44841	0.000251104	8
AK101474	Os02g0803700	Similar to 26S protease regulatory subunit 6A homolog (TAT-binding protein homolog 1) (TBP-1). (Os02t0803700-01), Similar to 26S protease regulatory subunit 6A homolog (TAT-binding protein homolog 1) (TBP-1). (Os02t0803700-02), Similar to 26S protease regulatory subunit 6A homolog. (Os02t0803700-03)	48051.8	K-LAGPQLVQMFIGDGAK-L	000000000000000000	241	256	822.949	2	7.82187	0.0098383	8
AK101474	Os02g0803700	Similar to 26S protease regulatory subunit 6A homolog (TAT-binding protein homolog 1) (TBP-1). (Os02t0803700-01), Similar to 26S protease regulatory subunit 6A homolog (TAT-binding protein homolog 1) (TBP-1). (Os02t0803700-02), Similar to 26S protease regulatory subunit 6A homolog. (Os02t0803700-03)	48051.8	R-ADILDPALMR-S	000000000000	325	334	557.802	2	2.92488	0.00702292	8
AK101474	Os02g0803700	Similar to 26S protease regulatory subunit 6A homolog (TAT-binding protein homolog 1) (TBP-1). (Os02t0803700-01), Similar to 26S protease regulatory subunit 6A homolog (TAT-binding protein homolog 1) (TBP-1). (Os02t0803700-02), Similar to 26S protease regulatory subunit 6A homolog. (Os02t0803700-03)	48051.8	R-KMNVNPDVNFEELAR-S	00300000000000000	362	376	597.966	3	8.45978	0.0447466	8
AK101474	Os02g0803700	Similar to 26S protease regulatory subunit 6A homolog (TAT-binding protein homolog 1) (TBP-1). (Os02t0803700-01), Similar to 26S protease regulatory subunit 6A homolog (TAT-binding protein homolog 1) (TBP-1). (Os02t0803700-02), Similar to 26S protease regulatory subunit 6A homolog. (Os02t0803700-03)	48051.8	R-DATEVTHEDFNEGIIQVQAK-K	0000000000000000000000	401	420	1122.55	2	6.76406	0.000319755	8
009-077-E08	Os02g0804100	Similar to predicted protein. (Os02t0804100-01)	9156.11	R-RFVTAVVGFGK-K	0000000000000	66	76	590.849	2	5.71635	0.0265958	2
009-077-E08	Os02g0804100	Similar to predicted protein. (Os02t0804100-01)	9156.11	R-FVTAVVGFGK-K	000000000000	67	76	512.798	2	5.30424	0.00130127	2
J065196K21	Os02g0804900	Ribonucleotide reductase. (Os02t0804900-00)	9246.91	K-LTSLHFHAWSK-V	0000000000000	41	51	663.856	2	7.47074	0.015562	1
AK119450	Os02g0812400	Trimeric LpxA-like domain containing protein. (Os02t0812400-01)	82333.4	R-SPLQAVLLADSFTLK-F	00000000000000000	24	38	801.965	2	8.26781	3.54985e-07	1
AK060823	Os02g0813300	Cyclin-like F-box domain containing protein. (Os02t0813300-01), Cyclin-like F-box domain containing protein. (Os02t0813300-02)	33835.8	R-LPEELLSAAISR-A	00000000000000	14	25	649.874	2	6.92981	0.00229783	3
AK060823	Os02g0813300	Cyclin-like F-box domain containing protein. (Os02t0813300-01), Cyclin-like F-box domain containing protein. (Os02t0813300-02)	33835.8	R-NLPDLADGELSPAPASK-K	0000000000000000000	58	74	847.94	2	7.49994	0.00244135	3
AK060823	Os02g0813300	Cyclin-like F-box domain containing protein. (Os02t0813300-01), Cyclin-like F-box domain containing protein. (Os02t0813300-02)	33835.8	R-GLIVQGIEIR-L	000000000000	283	292	549.342	2	7.38794	8.82583e-06	3
AK100446	Os02g0813500	Glutathione reductase, cytosolic (EC 1.8.1.7) (GR) (GRase). (Os02t0813500-01), Similar to Glutathione reductase, cytosolic. (Os02t0813500-02), Similar to Glutathione reductase, cytosolic. (Os02t0813500-03)	53970.7	R-TSVPNIWAVGDVTNR-I	00000000000000000	325	339	814.928	2	6.022	0.0275777	1
AK121994	Os02g0814700	Similar to 60S ribosomal protein L17. (Os02t0814700-01)	15234.1	K-NLYIISVK-G	0000000000	36	43	475.292	2	4.79285	7.29712e-05	2
AK121994	Os02g0814700	Similar to 60S ribosomal protein L17. (Os02t0814700-01)	15234.1	K-GSAITGPIGK-E	000000000000	114	123	450.765	2	7.89658	0.029326	2
AK099733	Os02g0815500	Alcohol dehydrogenase class III (EC 1.1.1.1) (Glutathione-dependent formaldehyde dehydrogenase) (EC 1.2.1.1) (FDH) (FALDH) (GSH-FDH). (Os02t0815500-01)	41862.1	K-NFGVTEFVNPK-D	0000000000000	239	249	626.324	2	3.65705	0.000263414	4
AK099733	Os02g0815500	Alcohol dehydrogenase class III (EC 1.1.1.1) (Glutathione-dependent formaldehyde dehydrogenase) (EC 1.2.1.1) (FDH) (FALDH) (GSH-FDH). (Os02t0815500-01)	41862.1	K-SRSQVPWLVEK-Y	0000000000000	329	339	664.873	2	4.77159	0.0382396	4
AK099733	Os02g0815500	Alcohol dehydrogenase class III (EC 1.1.1.1) (Glutathione-dependent formaldehyde dehydrogenase) (EC 1.2.1.1) (FDH) (FALDH) (GSH-FDH). (Os02t0815500-01)	41862.1	R-SQVPWLVEK-Y	00000000000	331	339	543.305	2	4.23151	0.0126886	4
AK099733	Os02g0815500	Alcohol dehydrogenase class III (EC 1.1.1.1) (Glutathione-dependent formaldehyde dehydrogenase) (EC 1.2.1.1) (FDH) (FALDH) (GSH-FDH). (Os02t0815500-01)	41862.1	K-YLNKEIK-V	000000000	340	346	454.27	2	7.92701	0.0329475	4
AK106810	Os02g0815800	S1, RNA binding domain containing protein. (Os02t0815800-01)	21134.8	R-ALVLSLGDAR-A	000000000000	139	148	507.803	2	4.64649	0.00312174	1
AK102271	Os02g0816800	NAD(P)-binding domain containing protein. (Os02t0816800-01)	44423	R-YLVQQLAK-M	0000000000	90	97	481.79	2	6.04101	0.0061868	2
AK102271	Os02g0816800	NAD(P)-binding domain containing protein. (Os02t0816800-01)	44423	K-SNVVINLIGR-E	000000000000	145	154	542.83	2	4.67734	0.000243903	2
AK072707	Os02g0817500	Potassium channel, voltage-dependent, beta subunit, KCNAB-related domain containing protein. (Os02t0817500-01), Potassium channel, voltage-dependent, beta subunit, KCNAB-related domain containing protein. (Os02t0817500-02)	36639.7	R-SLVDDTLR-K	0000000000	242	249	459.752	2	7.99997	0.0170241	1
AK069768	Os02g0817700	Similar to 3-ketoacyl-CoA thiolase (Fragment). (Os02t0817700-01), Similar to 3-ketoacyl-CoA thiolase (Fragment). (Os02t0817700-02)	47510.4	R-TSAYGDDVVVVAAYR-T	00000000000000000	42	56	793.399	2	3.00668	3.80751e-05	2
AK069768	Os02g0817700	Similar to 3-ketoacyl-CoA thiolase (Fragment). (Os02t0817700-01), Similar to 3-ketoacyl-CoA thiolase (Fragment). (Os02t0817700-02)	47510.4	K-KGLPILGVFR-S	000000000000	309	318	550.356	2	5.68995	0.00408595	2
AK062099	Os02g0821200	Ribosomal protein L28e domain containing protein. (Os02t0821200-01)	10238.7	--TVTIQPSGGKDAAVVLSTTK-T	0000000000000000000000	1	20	658.372	3	5.30146	0.00361069	2
AK062099	Os02g0821200	Ribosomal protein L28e domain containing protein. (Os02t0821200-01)	10238.7	K-DAAVVLSTTK-T	000000000000	11	20	502.787	2	4.96333	0.00246148	2
AK062099	Os02g0821200	Ribosomal protein L28e domain containing protein. (Os02t0821200-01)	10238.7	K-NQVSDNYYRPDLTKPALAR-L	000000000000000000000	49	67	741.054	3	5.27132	0.00229302	2
AK103477	Os02g0821800	Similar to Fibrillarin (Fragment). (Os02t0821800-01), Similar to fibrillarin-2. (Os02t0821800-02)	9669.93	R-ILALNASYFLK-N	0000000000000	9	19	626.874	2	9.31287	0.0245094	1
AK058380	Os02g0822200	Peptidase C12, ubiquitin carboxyl-terminal hydrolase 1 family protein. (Os02t0822200-01), Similar to UCH2; ubiquitin thiolesterase. (Os02t0822200-02)	37985.4	K-GLAINNSDSIR-T	0000000000000	119	129	580.31	2	5.73314	0.0051194	1
J080043B20	Os02g0822300	K Homology, type 1, subgroup domain containing protein. (Os02t0822300-00)	16693.4	R-NITEIIQASGAR-I	00000000000000	101	112	636.852	2	5.36545	0.00438014	1
AK068072	Os02g0822800	Galactose oxidase/kelch, beta-propeller domain containing protein. (Os02t0822800-01)	56904.5	R-YLSDIQVFDFR-T	0000000000000	58	68	701.858	2	5.89649	0.046217	1
009-023-E06	Os02g0824700	Similar to Vacuolar ATP synthase subunit F (EC 3.6.3.14) (V-ATPase F subunit) (Vacuolar proton pump F subunit) (V-ATPase 14 kDa subunit). (Os02t0824700-01)	14432.6	K-TNYLIVDNK-T	00000000000	41	49	540.292	2	4.21161	0.00120207	2
009-023-E06	Os02g0824700	Similar to Vacuolar ATP synthase subunit F (EC 3.6.3.14) (V-ATPase F subunit) (Vacuolar proton pump F subunit) (V-ATPase 14 kDa subunit). (Os02t0824700-01)	14432.6	K-YLFSAESVASDR-R	00000000000000	118	129	672.828	2	4.44467	0.00148021	2
AJ278822	Os02g0829100	Replication protein A 30kDa. (Os02t0829100-01)	30134	K-QISEAQQSGITGEK-G	0000000000000000	44	57	738.375	2	6.5915	0.0397371	4
AJ278822	Os02g0829100	Replication protein A 30kDa. (Os02t0829100-01)	30134	K-GAPFVVDGVETANVR-L	00000000000000000	58	72	765.904	2	5.70503	3.56538e-07	4
AJ278822	Os02g0829100	Replication protein A 30kDa. (Os02t0829100-01)	30134	R-NTDVSFTIDDGTGR-L	0000000000000000	84	97	749.346	2	2.00241	0.0123612	4
AJ278822	Os02g0829100	Replication protein A 30kDa. (Os02t0829100-01)	30134	K-TDLNTEVLNVFR-E	00000000000000	213	224	710.88	2	7.05745	3.40902e-05	4
J080050K16	Os02g0829800	Pentatricopeptide repeat domain containing protein. (Os02t0829800-01)	46004.3	R-ALSALLSAYHDNR-L	000000000000000	148	160	715.877	2	5.00715	3.88211e-07	2
J080050K16	Os02g0829800	Pentatricopeptide repeat domain containing protein. (Os02t0829800-01)	46004.3	K-SFVASGDLASAR-A	00000000000000	191	202	590.803	2	2.95699	1.60739e-06	2
AK065077	Os02g0830100	Similar to Oligopeptidase A. (Os02t0830100-01), Similar to Oligopeptidase A. (Os02t0830100-02), Similar to predicted protein. (Os02t0830100-03), Similar to predicted protein. (Os02t0830100-04)	86590.3	R-LEGELTDLEK-G	000000000000	108	117	573.799	2	1.76891	0.000868997	16
AK065077	Os02g0830100	Similar to Oligopeptidase A. (Os02t0830100-01), Similar to Oligopeptidase A. (Os02t0830100-02), Similar to predicted protein. (Os02t0830100-03), Similar to predicted protein. (Os02t0830100-04)	86590.3	R-AAVEDVQPDKVK-F	00000000000000	158	169	649.854	2	4.18017	8.27998e-05	16
AK065077	Os02g0830100	Similar to Oligopeptidase A. (Os02t0830100-01), Similar to Oligopeptidase A. (Os02t0830100-02), Similar to predicted protein. (Os02t0830100-03), Similar to predicted protein. (Os02t0830100-04)	86590.3	R-LGQSKPIYQAFNAIR-N	00000000000000000	174	188	853.477	2	4.94507	0.00832525	16
AK065077	Os02g0830100	Similar to Oligopeptidase A. (Os02t0830100-01), Similar to Oligopeptidase A. (Os02t0830100-02), Similar to predicted protein. (Os02t0830100-03), Similar to predicted protein. (Os02t0830100-04)	86590.3	R-NSSDWETLSEAR-K	00000000000000	189	200	697.815	2	3.3003	3.44593e-06	16
AK065077	Os02g0830100	Similar to Oligopeptidase A. (Os02t0830100-01), Similar to Oligopeptidase A. (Os02t0830100-02), Similar to predicted protein. (Os02t0830100-03), Similar to predicted protein. (Os02t0830100-04)	86590.3	K-FNQIEQELEKLTQK-F	0000000000000000	226	239	583.316	3	6.14647	0.0236185	16
[truncated: 5,486 more rows]
