# Supplementary material for: Identification of Proteins Enriched in Rice Egg or Sperm Cells by Single-Cell Proteomics
Source: PLoS One. 2013 Jul 25;8(7):e69578. doi: 10.1371/journal.pone.0069578 (PMC3723872; doi:10.1371/journal.pone.0069578)
Supplement: Table S5 — Proteins detected in rice sperm cells by LC-MS/MS. (XLS) [file pone.0069578.s008.xls]

## Sheet: Table S5
Table S5. Proteins detected in rice sperm cells by LC-MS/MS analysis. (a) Protein annotations are referred from The Rice Annotation Project Database (RAPDB). (b) The left- and right-most ends of the number represent modification of the N- and C-terminal residues of the peptide, respectively. The number between them represents the side chain of each corresponding amino acid. 0, no modification; 1,…
cDNA accession	Gene locus	Proteina	Protein MW	Peptide identified	Modificationb	Startc	Endc	m/z	Charge	Delta mass (ppm)	Expect score (P-value)d	Number of spectrum identifiede
AK121523	Os01g0100700	Similar to 40S ribosomal protein S5-1. (Os01t0100700-01)	22425.8	R-QAVDISPLR-R	00000000000	133	141	499.786	2	1.29195	0.00341323	2	Os01g0100700|AK121523QAVDISPLR00000000000
AK121523	Os01g0100700	Similar to 40S ribosomal protein S5-1. (Os01t0100700-01)	22425.8	R-VNQAIYLLTTGAR-E	000000000000000	143	155	710.401	2	-0.828638	1.84656e-08	2	Os01g0100700|AK121523VNQAIYLLTTGAR000000000000000
AY972084	Os01g0100900	Pyridoxal phosphate-dependent decarboxylase domain containing protein. (Os01t0100900-01)	58802.5	K-VVDQLQSGGTSTK-S	000000000000000	82	94	660.342	2	-1.97626	0.00171321	1	Os01g0100900|AY972084VVDQLQSGGTSTK000000000000000
AK063774	Os01g0102700	Translocon-associated beta family protein. (Os01t0102700-01)	22802.1	K-EAFELVSGEMSK-T	00000000003000	71	82	671.813	2	0.0557354	0.000262644	5	Os01g0102700|AK063774EAFELVSGEMSK00000000003000
AK063774	Os01g0102700	Translocon-associated beta family protein. (Os01t0102700-01)	22802.1	R-LDPGVTASHAFVLETK-V	000000000000000000	87	102	842.949	2	-0.16944	0.0492392	5	Os01g0102700|AK063774LDPGVTASHAFVLETK000000000000000000
AK063774	Os01g0102700	Translocon-associated beta family protein. (Os01t0102700-01)	22802.1	R-FQGSPAVITYR-V	0000000000000	107	117	619.831	2	1.24428	0.000444908	5	Os01g0102700|AK063774FQGSPAVITYR0000000000000
AK063774	Os01g0102700	Translocon-associated beta family protein. (Os01t0102700-01)	22802.1	R-FQGSPAVITYRVPTK-A	00000000000000000	107	121	555.311	3	0.715417	0.0252079	5	Os01g0102700|AK063774FQGSPAVITYRVPTK00000000000000000
AK063774	Os01g0102700	Translocon-associated beta family protein. (Os01t0102700-01)	22802.1	K-AALQEAYSTPILALDVLAERPPEKK-F	000000000000000000000000000	122	146	908.511	3	7.51276	0.00141562	5	Os01g0102700|AK063774AALQEAYSTPILALDVLAERPPEKK000000000000000000000000000
AK071375	Os01g0104400	Ricin B-related lectin domain containing protein. (Os01t0104400-01), Ricin B-related lectin domain containing protein. (Os01t0104400-02), Ricin B-related lectin domain containing protein. (Os01t0104400-03)	30411.5	R-VKDEEGYPAMALVNK-A	00000000003000000	163	177	560.615	3	-0.588176	0.0234227	1	Os01g0104400|AK071375VKDEEGYPAMALVNK00000000003000000
AK060999	Os01g0106200	Similar to RER1A protein (AtRER1A). (Os01t0106200-01)	21825.4	--MDGAADSGTAGAAAAAAK-W	13000000000000000000	1	18	782.849	2	0.367414	9.43789e-10	2	Os01g0106200|AK060999MDGAADSGTAGAAAAAAK13000000000000000000
AK060999	Os01g0106200	Similar to RER1A protein (AtRER1A). (Os01t0106200-01)	21825.4	R-AFQYYLDR-S	0000000000	26	33	538.265	2	1.33513	0.00375391	2	Os01g0106200|AK060999AFQYYLDR0000000000
AK121497	Os01g0109700	Similar to Paired amphipathic helix protein SIN3. (Os01t0109700-01)	150543	K-SGLATVGEINTTAAGAVAK-H	000000000000000000000	682	700	865.967	2	-0.653421	0.000615806	1	Os01g0109700|AK121497SGLATVGEINTTAAGAVAK000000000000000000000
AK100688	Os01g0110700	Similar to Phosphoenolpyruvate carboxylase (EC 4.1.1.31). (Os01t0110700-01), Similar to Phosphoenolpyruvate carboxylase. (Os01t0110700-02)	116904	R-SAGVEDTAVVVEK-Q	000000000000000	59	71	652.344	2	4.85956	0.00151017	1	Os01g0110700|AK100688SAGVEDTAVVVEK000000000000000
AK099387	Os01g0118000	Similar to Fructose-bisphosphate aldolase (EC 4.1.2.13) (Fragment). (Os01t0118000-01)	42322.9	R-LASIGLDNTEVNR-Q	000000000000000	73	85	701.369	2	-1.40167	3.90294e-06	2	Os01g0118000|AK099387LASIGLDNTEVNR000000000000000
AK099387	Os01g0118000	Similar to Fructose-bisphosphate aldolase (EC 4.1.2.13) (Fragment). (Os01t0118000-01)	42322.9	K-TWQGRPENVEAAQK-A	0000000000000000	338	351	807.407	2	2.04227	0.00890818	2	Os01g0118000|AK099387TWQGRPENVEAAQK0000000000000000
AK105256	Os01g0119500	Protein of unknown function DUF1618 domain containing protein. (Os01t0119500-01)	51265.2	R-QNAEAAGKVGASAK-G	0000000000000000	433	446	651.334	2	-14.9185	0.00925064	1	Os01g0119500|AK105256QNAEAAGKVGASAK0000000000000000
AK104753	Os01g0120400	Alanyl-tRNA synthetase, class IIc family protein. (Os01t0120400-01), Alanyl-tRNA synthetase, class IIc family protein. (Os01t0120400-02)	28445.3	R-FIVDDVRMK-D	00000000300	74	82	569.793	2	-12.1303	0.0167414	1	Os01g0120400|AK104753FIVDDVRMK00000000300
AK105015	Os01g0125600	Heavy metal transport/detoxification protein domain containing protein. (Os01t0125600-01)	46103.9	K-DEDFKLVK-I	0000000000	4	11	497.271	2	9.36724	0.000297883	1	Os01g0125600|AK105015DEDFKLVK0000000000
AK121214	Os01g0128400	Conserved hypothetical protein. (Os01t0128400-01), Similar to predicted protein. (Os01t0128400-02)	63774.3	R-NTASDWINQR-S	000000000000	213	222	602.794	2	8.37692	0.00518291	6	Os01g0128400|AK121214NTASDWINQR000000000000
AK121214	Os01g0128400	Conserved hypothetical protein. (Os01t0128400-01), Similar to predicted protein. (Os01t0128400-02)	63774.3	R-RKPEVLTNVLPK-I	00000000000000	276	287	465.289	3	0.40818	0.024678	6	Os01g0128400|AK121214RKPEVLTNVLPK00000000000000
AK121214	Os01g0128400	Conserved hypothetical protein. (Os01t0128400-01), Similar to predicted protein. (Os01t0128400-02)	63774.3	R-DLVLQLLER-I	00000000000	342	350	549.83	2	1.38698	0.000331804	6	Os01g0128400|AK121214DLVLQLLER00000000000
AK121214	Os01g0128400	Conserved hypothetical protein. (Os01t0128400-01), Similar to predicted protein. (Os01t0128400-02)	63774.3	R-GILLNGAVR-K	00000000000	359	367	456.785	2	1.23527	0.00925418	6	Os01g0128400|AK121214GILLNGAVR00000000000
AK121214	Os01g0128400	Conserved hypothetical protein. (Os01t0128400-01), Similar to predicted protein. (Os01t0128400-02)	63774.3	R-FEAAYPTIK-E	00000000000	399	407	520.277	2	0.915046	0.00403593	6	Os01g0128400|AK121214FEAAYPTIK00000000000
AK121214	Os01g0128400	Conserved hypothetical protein. (Os01t0128400-01), Similar to predicted protein. (Os01t0128400-02)	63774.3	R-TKNEAALEAATDSGK-Q	00000000000000000	507	521	753.376	2	0.0205466	0.00420013	6	Os01g0128400|AK121214TKNEAALEAATDSGK00000000000000000
J100059I20	Os01g0131800	Signal peptidase 22 kDa subunit family protein. (Os01t0131800-01)	18995.9	K-ANLQVEVK-S	0000000000	111	118	450.761	2	0.325387	0.000323189	1	Os01g0131800|J100059I20ANLQVEVK0000000000
AK106795	Os01g0132400	Conserved hypothetical protein. (Os01t0132400-01)	41416	R-GGGAPGEGSSDEVGDAVGLGR-G	00000000000000000000000	19	39	922.426	2	1.26755	0.00020962	2	Os01g0132400|AK106795GGGAPGEGSSDEVGDAVGLGR00000000000000000000000
AK106795	Os01g0132400	Conserved hypothetical protein. (Os01t0132400-01)	41416	R-ATDANATPVSTYR-G	000000000000000	115	127	683.832	2	-2.06107	0.000864124	2	Os01g0132400|AK106795ATDANATPVSTYR000000000000000
AK108760	Os01g0133100	Conserved hypothetical protein. (Os01t0133100-01), Hypothetical conserved gene. (Os01t0133100-02)	70544.4	--MSSLAIVEK-R	03000000000	1	9	497.273	2	9.37022	0.038009	1	Os01g0133100|AK108760MSSLAIVEK03000000000
AK065247	Os01g0133400	Similar to Hexose transporter (Fragment). (Os01t0133400-01)	56821.2	R-ATATVDPEDIPLEK-V	0000000000000000	79	92	749.886	2	0.790391	0.000728536	10	Os01g0133400|AK065247ATATVDPEDIPLEK0000000000000000
AK065247	Os01g0133400	Similar to Hexose transporter (Fragment). (Os01t0133400-01)	56821.2	R-ATATVDPEDIPLEKVQAK-S	00000000000000000000	79	96	642.345	3	-1.24504	0.0410846	10	Os01g0133400|AK065247ATATVDPEDIPLEKVQAK00000000000000000000
AK065247	Os01g0133400	Similar to Hexose transporter (Fragment). (Os01t0133400-01)	56821.2	K-LSQAETAIK-K	00000000000	293	301	480.771	2	-0.772138	5.8676e-05	10	Os01g0133400|AK065247LSQAETAIK00000000000
AK065247	Os01g0133400	Similar to Hexose transporter (Fragment). (Os01t0133400-01)	56821.2	K-LSQAETAIKK-L	000000000000	293	302	544.82	2	0.732832	0.00180517	10	Os01g0133400|AK065247LSQAETAIKK000000000000
AK065247	Os01g0133400	Similar to Hexose transporter (Fragment). (Os01t0133400-01)	56821.2	R-EKVAEVMYDLK-A	0000000000000	307	317	662.846	2	1.83775	0.0433272	10	Os01g0133400|AK065247EKVAEVMYDLK0000000000000
AK065247	Os01g0133400	Similar to Hexose transporter (Fragment). (Os01t0133400-01)	56821.2	K-VAEVMYDLK-A	00000300000	309	317	542.274	2	2.41495	0.00114846	10	Os01g0133400|AK065247VAEVMYDLK00000300000
AK065247	Os01g0133400	Similar to Hexose transporter (Fragment). (Os01t0133400-01)	56821.2	K-VAEVMYDLK-A	00000000000	309	317	534.277	2	2.02042	0.00660549	10	Os01g0133400|AK065247VAEVMYDLK00000000000
AK065247	Os01g0133400	Similar to Hexose transporter (Fragment). (Os01t0133400-01)	56821.2	K-AASQGSSEPDAGWLDLFSK-R	000000000000000000000	318	336	983.465	2	2.18035	0.00134079	10	Os01g0133400|AK065247AASQGSSEPDAGWLDLFSK000000000000000000000
AK063402	Os01g0134800	Similar to (1,4)-beta-xylan endohydrolase, isoenzyme X-II (EC 3.2.1.8) (Fragment). (Os01t0134800-01)	41348.7	K-YVVQLTTGAGEMK-Y	000000000000300	337	349	706.86	2	2.70319	0.0455786	1	Os01g0134800|AK063402YVVQLTTGAGEMK000000000000300
AK108438	Os01g0143300	Similar to Glycine-rich protein (Fragment). (Os01t0143300-01)	29489.5	K-SSIPLTVTISK-G	0000000000000	158	168	573.343	2	1.10908	0.0149603	1	Os01g0143300|AK108438SSIPLTVTISK0000000000000
Os01g0143700	Os01g0143700	Hypothetical conserved gene. (Os01t0143700-00)	29241.6	K-SSIPLTVTISK-G	0000000000000	153	163	573.343	2	1.10908	0.0149603	1	Os01g0143700|Os01g0143700SSIPLTVTISK0000000000000
AK060920	Os01g0147900	Triosephosphate isomerase, cytosolic (EC 5.3.1.1) (TIM) (Triose- phosphate isomerase). (Os01t0147900-01)	27330.2	R-SLLGESNEFVGDK-V	000000000000000	101	113	697.844	2	1.26779	0.00402874	5	Os01g0147900|AK060920SLLGESNEFVGDK000000000000000
AK060920	Os01g0147900	Triosephosphate isomerase, cytosolic (EC 5.3.1.1) (TIM) (Triose- phosphate isomerase). (Os01t0147900-01)	27330.2	K-VAYALSQGLK-V	000000000000	114	123	525.303	2	0.563355	0.000130536	5	Os01g0147900|AK060920VAYALSQGLK000000000000
AK060920	Os01g0147900	Triosephosphate isomerase, cytosolic (EC 5.3.1.1) (TIM) (Triose- phosphate isomerase). (Os01t0147900-01)	27330.2	R-ESGSTMDVVAAQTK-A	0000003000000000	136	149	720.337	2	-1.51938	4.87889e-06	5	Os01g0147900|AK060920ESGSTMDVVAAQTK0000003000000000
AK060920	Os01g0147900	Triosephosphate isomerase, cytosolic (EC 5.3.1.1) (TIM) (Triose- phosphate isomerase). (Os01t0147900-01)	27330.2	K-VATPDQAQEVHDGLRK-W	000000000000000000	176	191	882.456	2	0.281845	0.000811524	5	Os01g0147900|AK060920VATPDQAQEVHDGLRK000000000000000000
AK060920	Os01g0147900	Triosephosphate isomerase, cytosolic (EC 5.3.1.1) (TIM) (Triose- phosphate isomerase). (Os01t0147900-01)	27330.2	R-IIYGGSVTGANCK-E	000000000000000	207	219	677.344	2	-1.85671	5.99786e-06	5	Os01g0147900|AK060920IIYGGSVTGANCK000000000000000
D29712	Os01g0149400	Similar to Histone H2B.1. (Os01t0149400-00)	7192.05	K-KPAEEEPAAEK-A	0000000000000	13	23	599.798	2	-4.81769	0.00351049	1	Os01g0149400|D29712KPAEEEPAAEK0000000000000
D29712	Os01g0149400	Similar to Histone H2B.1. (Os01t0149400-00)	7192.05	K-KPAEEEPAAEKAEK-A	0000000000000000	13	26	763.886	2	-3.609	0.00867293	1	Os01g0149400|D29712KPAEEEPAAEKAEK0000000000000000
J013159K20	Os01g0149600	Similar to Histone H2B.1. (Os01t0149600-00)	16492.1	K-KPAEEEPAAEK-A	0000000000000	13	23	599.798	2	-4.81769	0.00351049	4	Os01g0149600|J013159K20KPAEEEPAAEK0000000000000
J013159K20	Os01g0149600	Similar to Histone H2B.1. (Os01t0149600-00)	16492.1	K-KPAEEEPAAEKAEK-A	0000000000000000	13	26	763.886	2	-3.609	0.00867293	4	Os01g0149600|J013159K20KPAEEEPAAEKAEK0000000000000000
J013159K20	Os01g0149600	Similar to Histone H2B.1. (Os01t0149600-00)	16492.1	K-QVHPDIGISSK-A	2000000000000	76	86	582.306	2	-0.431157	0.0118954	4	Os01g0149600|J013159K20QVHPDIGISSK2000000000000
J013159K20	Os01g0149600	Similar to Histone H2B.1. (Os01t0149600-00)	16492.1	K-AMSIMNSFINDIFEK-L	00300300000000000	87	101	896.419	2	0.470233	4.0755e-06	4	Os01g0149600|J013159K20AMSIMNSFINDIFEK00300300000000000
J013159K20	Os01g0149600	Similar to Histone H2B.1. (Os01t0149600-00)	16492.1	R-YNKKPTITSR-E	000000000000	112	121	604.343	2	0.2354	0.0416603	4	Os01g0149600|J013159K20YNKKPTITSR000000000000
J013159K20	Os01g0149600	Similar to Histone H2B.1. (Os01t0149600-00)	16492.1	R-LVLPGELAK-H	00000000000	129	137	470.299	2	3.81917	0.00581248	4	Os01g0149600|J013159K20LVLPGELAK00000000000
AK060948	Os01g0150000	Similar to Synaptic glycoprotein SC2. (Os01t0150000-01), 3-oxo-5-alpha-steroid 4-dehydrogenase, C-terminal domain containing protein. (Os01t0150000-02)	36282.6	--MKVSVVSR-S	0300000000	1	8	461.262	2	-2.45419	0.00273851	5	Os01g0150000|AK060948MKVSVVSR0300000000
AK060948	Os01g0150000	Similar to Synaptic glycoprotein SC2. (Os01t0150000-01), 3-oxo-5-alpha-steroid 4-dehydrogenase, C-terminal domain containing protein. (Os01t0150000-02)	36282.6	R-GGVELKDSAK-V	000000000000	16	25	502.274	2	-1.68196	0.0311994	5	Os01g0150000|AK060948GGVELKDSAK000000000000
AK060948	Os01g0150000	Similar to Synaptic glycoprotein SC2. (Os01t0150000-01), 3-oxo-5-alpha-steroid 4-dehydrogenase, C-terminal domain containing protein. (Os01t0150000-02)	36282.6	K-VADLQDAIYAK-T	0000000000000	26	36	603.823	2	1.16314	2.00548e-07	5	Os01g0150000|AK060948VADLQDAIYAK0000000000000
AK060948	Os01g0150000	Similar to Synaptic glycoprotein SC2. (Os01t0150000-01), 3-oxo-5-alpha-steroid 4-dehydrogenase, C-terminal domain containing protein. (Os01t0150000-02)	36282.6	R-LTLPIQPGK-S	00000000000	47	55	483.803	2	0.1547	0.0101808	5	Os01g0150000|AK060948LTLPIQPGK00000000000
AK060948	Os01g0150000	Similar to Synaptic glycoprotein SC2. (Os01t0150000-01), 3-oxo-5-alpha-steroid 4-dehydrogenase, C-terminal domain containing protein. (Os01t0150000-02)	36282.6	K-SGKPVVLSAK-A	000000000000	56	65	493.305	2	-0.427866	0.00737969	5	Os01g0150000|AK060948SGKPVVLSAK000000000000
AK060948	Os01g0150000	Similar to Synaptic glycoprotein SC2. (Os01t0150000-01), 3-oxo-5-alpha-steroid 4-dehydrogenase, C-terminal domain containing protein. (Os01t0150000-02)	36282.6	R-SPSGNGGYQIPR-G	00000000000000	222	233	616.808	2	5.96051	0.0016822	5	Os01g0150000|AK060948SPSGNGGYQIPR00000000000000
AK099465	Os01g0150200	Protein-tyrosine phosphatase-like, PTPLA domain containing protein. (Os01t0150200-01), Protein-tyrosine phosphatase-like, PTPLA domain containing protein. (Os01t0150200-02)	25072.1	R-SPVSATLPQIGSR-L	000000000000000	72	84	656.865	2	1.05415	0.00272177	1	Os01g0150200|AK099465SPVSATLPQIGSR000000000000000
J053046N17	Os01g0152300	Similar to Histone H2B.1. (Os01t0152300-00)	16538.2	K-KPAEEEPAAEK-A	0000000000000	13	23	599.798	2	-4.81769	0.00351049	4	Os01g0152300|J053046N17KPAEEEPAAEK0000000000000
J053046N17	Os01g0152300	Similar to Histone H2B.1. (Os01t0152300-00)	16538.2	K-KPAEEEPAAEKAEK-A	0000000000000000	13	26	763.886	2	-3.609	0.00867293	4	Os01g0152300|J053046N17KPAEEEPAAEKAEK0000000000000000
J053046N17	Os01g0152300	Similar to Histone H2B.1. (Os01t0152300-00)	16538.2	K-QVHPDIGISSK-A	2000000000000	76	86	582.306	2	-0.431157	0.0118954	4	Os01g0152300|J053046N17QVHPDIGISSK2000000000000
J053046N17	Os01g0152300	Similar to Histone H2B.1. (Os01t0152300-00)	16538.2	K-AMSIMNSFINDIFEK-L	00300300000000000	87	101	896.419	2	0.470233	4.0755e-06	4	Os01g0152300|J053046N17AMSIMNSFINDIFEK00300300000000000
J053046N17	Os01g0152300	Similar to Histone H2B.1. (Os01t0152300-00)	16538.2	R-YNKKPTITSR-E	000000000000	112	121	604.343	2	0.2354	0.0416603	4	Os01g0152300|J053046N17YNKKPTITSR000000000000
J053046N17	Os01g0152300	Similar to Histone H2B.1. (Os01t0152300-00)	16538.2	R-LVLPGELAK-H	00000000000	129	137	470.299	2	3.81917	0.00581248	4	Os01g0152300|J053046N17LVLPGELAK00000000000
AK059159	Os01g0152700	Similar to Histone H2B (CaH2B). (Os01t0152700-01)	4392.45	R-LVLPGELAK-H	00000000000	17	25	470.299	2	3.81917	0.00581248	1	Os01g0152700|AK059159LVLPGELAK00000000000
AB075378	Os01g0152900	Similar to Histone H2B.1. (Os01t0152900-00)	16464.1	K-KPAEEEPAAEK-A	0000000000000	13	23	599.798	2	-4.81769	0.00351049	4	Os01g0152900|AB075378KPAEEEPAAEK0000000000000
AB075378	Os01g0152900	Similar to Histone H2B.1. (Os01t0152900-00)	16464.1	K-KPAEEEPAAEKAEK-A	0000000000000000	13	26	763.886	2	-3.609	0.00867293	4	Os01g0152900|AB075378KPAEEEPAAEKAEK0000000000000000
AB075378	Os01g0152900	Similar to Histone H2B.1. (Os01t0152900-00)	16464.1	K-QVHPDIGISSK-A	2000000000000	76	86	582.306	2	-0.431157	0.0118954	4	Os01g0152900|AB075378QVHPDIGISSK2000000000000
AB075378	Os01g0152900	Similar to Histone H2B.1. (Os01t0152900-00)	16464.1	K-AMSIMNSFINDIFEK-L	00300300000000000	87	101	896.419	2	0.470233	4.0755e-06	4	Os01g0152900|AB075378AMSIMNSFINDIFEK00300300000000000
AB075378	Os01g0152900	Similar to Histone H2B.1. (Os01t0152900-00)	16464.1	R-YNKKPTITSR-E	000000000000	112	121	604.343	2	0.2354	0.0416603	4	Os01g0152900|AB075378YNKKPTITSR000000000000
AB075378	Os01g0152900	Similar to Histone H2B.1. (Os01t0152900-00)	16464.1	R-LVLPGELAK-H	00000000000	129	137	470.299	2	3.81917	0.00581248	4	Os01g0152900|AB075378LVLPGELAK00000000000
J080013I19	Os01g0153100	Similar to Histone H2B-3 (Fragment). (Os01t0153100-00)	16462.1	K-KPAEEEPAAEK-A	0000000000000	13	23	599.798	2	-4.81769	0.00351049	4	Os01g0153100|J080013I19KPAEEEPAAEK0000000000000
J080013I19	Os01g0153100	Similar to Histone H2B-3 (Fragment). (Os01t0153100-00)	16462.1	K-KPAEEEPAAEKAEK-A	0000000000000000	13	26	763.886	2	-3.609	0.00867293	4	Os01g0153100|J080013I19KPAEEEPAAEKAEK0000000000000000
J080013I19	Os01g0153100	Similar to Histone H2B-3 (Fragment). (Os01t0153100-00)	16462.1	K-QVHPDIGISSK-A	2000000000000	76	86	582.306	2	-0.431157	0.0118954	4	Os01g0153100|J080013I19QVHPDIGISSK2000000000000
J080013I19	Os01g0153100	Similar to Histone H2B-3 (Fragment). (Os01t0153100-00)	16462.1	K-AMSIMNSFINDIFEK-L	00300300000000000	87	101	896.419	2	0.470233	4.0755e-06	4	Os01g0153100|J080013I19AMSIMNSFINDIFEK00300300000000000
J080013I19	Os01g0153100	Similar to Histone H2B-3 (Fragment). (Os01t0153100-00)	16462.1	R-YNKKPTITSR-E	000000000000	112	121	604.343	2	0.2354	0.0416603	4	Os01g0153100|J080013I19YNKKPTITSR000000000000
J080013I19	Os01g0153100	Similar to Histone H2B-3 (Fragment). (Os01t0153100-00)	16462.1	R-LVLPGELAK-H	00000000000	129	137	470.299	2	3.81917	0.00581248	4	Os01g0153100|J080013I19LVLPGELAK00000000000
J080075I08	Os01g0153300	Similar to Histone H2B.1. (Os01t0153300-00)	16747.2	K-KPAEEEPAAEK-A	0000000000000	13	23	599.798	2	-4.81769	0.00351049	4	Os01g0153300|J080075I08KPAEEEPAAEK0000000000000
J080075I08	Os01g0153300	Similar to Histone H2B.1. (Os01t0153300-00)	16747.2	K-KPAEEEPAAEKAEK-A	0000000000000000	13	26	763.886	2	-3.609	0.00867293	4	Os01g0153300|J080075I08KPAEEEPAAEKAEK0000000000000000
J080075I08	Os01g0153300	Similar to Histone H2B.1. (Os01t0153300-00)	16747.2	K-QVHPDIGISSK-A	2000000000000	78	88	582.306	2	-0.431157	0.0118954	4	Os01g0153300|J080075I08QVHPDIGISSK2000000000000
J080075I08	Os01g0153300	Similar to Histone H2B.1. (Os01t0153300-00)	16747.2	K-AMSIMNSFINDIFEK-L	00300300000000000	89	103	896.419	2	0.470233	4.0755e-06	4	Os01g0153300|J080075I08AMSIMNSFINDIFEK00300300000000000
J080075I08	Os01g0153300	Similar to Histone H2B.1. (Os01t0153300-00)	16747.2	R-YNKKPTITSR-E	000000000000	114	123	604.343	2	0.2354	0.0416603	4	Os01g0153300|J080075I08YNKKPTITSR000000000000
J080075I08	Os01g0153300	Similar to Histone H2B.1. (Os01t0153300-00)	16747.2	R-LVLPGELAK-H	00000000000	131	139	470.299	2	3.81917	0.00581248	4	Os01g0153300|J080075I08LVLPGELAK00000000000
J065005P06	Os01g0158500	Similar to arginyl-tRNA synthetase. (Os01t0158500-01)	9150.86	R-AVLDFSSPNIAK-E	00000000000000	18	29	631.343	2	0.55428	0.0322186	1	Os01g0158500|J065005P06AVLDFSSPNIAK00000000000000
AK100550	Os01g0159400	Similar to Acyl-coenzyme A oxidase 4, peroxisomal (EC 1.3.3.6) (AOX 4) (Short- chain acyl-CoA oxidase) (SAOX) (AtCX4) (G6p) (AtG6). (Os01t0159400-01)	47289.7	K-MTPGHASLGK-G	030000000000	351	360	507.755	2	-0.0452076	0.0067148	1	Os01g0159400|AK100550MTPGHASLGK030000000000
AK069905	Os01g0160100	Similar to Pyruvate decarboxylase isozyme 2 (EC 4.1.1.1) (PDC) (Fragment). (Os01t0160100-01)	65306.9	K-ELLEWGSR-V	0000000000	578	585	495.255	2	-2.64376	0.0499373	2	Os01g0160100|AK069905ELLEWGSR0000000000
AK069905	Os01g0160100	Similar to Pyruvate decarboxylase isozyme 2 (EC 4.1.1.1) (PDC) (Fragment). (Os01t0160100-01)	65306.9	R-VSAANSRPPNPQ--	00000000000000	586	597	619.317	2	-0.701245	0.00041426	2	Os01g0160100|AK069905VSAANSRPPNPQ00000000000000
AK121992	Os01g0168100	KIP1-like domain containing protein. (Os01t0168100-01), Similar to CENP-E like kinetochore protein. (Os01t0168100-02)	67981.2	K-SSLGAEIQKLK-E	0000000000000	413	423	587.337	2	-13.6697	0.0213881	1	Os01g0168100|AK121992SSLGAEIQKLK0000000000000
AK063678	Os01g0168300	Conserved hypothetical protein. (Os01t0168300-01)	42052	K-LLAVDIPMASGPDQR-L	00000000300000000	275	289	799.915	2	1.02569	7.4437e-06	3	Os01g0168300|AK063678LLAVDIPMASGPDQR00000000300000000
AK063678	Os01g0168300	Conserved hypothetical protein. (Os01t0168300-01)	42052	R-LREEYEER-K	0000000000	361	368	562.271	2	-2.9417	0.0190626	3	Os01g0168300|AK063678LREEYEER0000000000
AK100326	Os01g0172200	DNA/RNA helicase, DEAD/DEAH box type, N-terminal domain containing protein. (Os01t0172200-01)	83746.7	R-GADIVVATPGR-L	0000000000000	353	363	528.296	2	0.93519	0.044206	1	Os01g0172200|AK100326GADIVVATPGR0000000000000
AK121114	Os01g0173100	Alba, DNA/RNA-binding protein family protein. (Os01t0173100-01)	16250.4	M-AVEEITEGVR-N	000000000000	2	11	551.791	2	0.360891	6.14653e-05	5	Os01g0173100|AK121114AVEEITEGVR000000000000
AK121114	Os01g0173100	Alba, DNA/RNA-binding protein family protein. (Os01t0173100-01)	16250.4	R-NLAVEGEPAAAAAAAGGGGEGAQR-R	00000000000000000000000000	12	35	1048.01	2	1.23734	2.7956e-10	5	Os01g0173100|AK121114NLAVEGEPAAAAAAAGGGGEGAQR00000000000000000000000000
AK121114	Os01g0173100	Alba, DNA/RNA-binding protein family protein. (Os01t0173100-01)	16250.4	K-KPLFFYVNLAK-R	0000000000000	52	62	670.391	2	-1.98541	0.0032766	5	Os01g0173100|AK121114KPLFFYVNLAK0000000000000
AK121114	Os01g0173100	Alba, DNA/RNA-binding protein family protein. (Os01t0173100-01)	16250.4	R-TSTVEINDESR-V	0000000000000	103	113	625.795	2	-2.65235	0.00056674	5	Os01g0173100|AK121114TSTVEINDESR0000000000000
AK121114	Os01g0173100	Alba, DNA/RNA-binding protein family protein. (Os01t0173100-01)	16250.4	K-FDELMAAAAEER-E	00000300000000	132	143	684.81	2	2.35923	2.25463e-09	5	Os01g0173100|AK121114FDELMAAAAEER00000300000000
AK121690	Os01g0173900	Similar to MRP-like ABC transporter. (Os01t0173900-01)	166051	K-STLIQALFR-I	00000000000	1303	1311	524.811	2	0.667529	8.38347e-06	1	Os01g0173900|AK121690STLIQALFR00000000000
AK071324	Os01g0174300	Flavoprotein pyridine nucleotide cytochrome reductase domain containing protein. (Os01t0174300-01)	34043.8	R-APIGEEVEGGR-K	0000000000000	101	111	557.276	2	-7.82756	0.00577309	1	Os01g0174300|AK071324APIGEEVEGGR0000000000000
AK101660	Os01g0174700	Similar to Akt (Fragment). (Os01t0174700-01), Similar to Akt (Fragment). (Os01t0174700-02), Similar to predicted protein. (Os01t0174700-03)	55041.8	R-SSLTAPDSR-R	00000000000	15	23	467.236	2	0.207157	0.0078006	2	Os01g0174700|AK101660SSLTAPDSR00000000000
AK103230	Os01g0177200	Similar to Ubiquitin-specific protease 14. (Os01t0177200-01)	89319	R-KALAASGGNIER-A	00000000000000	690	701	593.831	2	1.56597	0.000461674	2	Os01g0177200|AK103230KALAASGGNIER00000000000000
AK103230	Os01g0177200	Similar to Ubiquitin-specific protease 14. (Os01t0177200-01)	89319	K-ALAASGGNIER-A	0000000000000	691	701	529.782	2	-1.69747	3.62501e-05	2	Os01g0177200|AK103230ALAASGGNIER0000000000000
AK067702	Os01g0178000	Pyridoxal phosphate-dependent transferase, major region, subdomain 1 domain containing protein. (Os01t0178000-01), Similar to Transaminase/ transferase, transferring nitrogenous groups. (Os01t0178000-02)	44074.4	K-YGSDDGLPELR-E	0000000000000	64	74	611.291	2	-0.566717	0.0235623	1	Os01g0178000|AK067702YGSDDGLPELR0000000000000
AK069903	Os01g0179700	Similar to GTP-binding protein YPTM2. (Os01t0179700-01), Similar to GTP-binding protein YPTM2. (Os01t0179700-02)	22719.3	--MNPEYDYLFK-L	030000000000	1	10	668.306	2	8.69697	0.0288065	5	Os01g0179700|AK069903MNPEYDYLFK030000000000
AK069903	Os01g0179700	Similar to GTP-binding protein YPTM2. (Os01t0179700-01), Similar to GTP-binding protein YPTM2. (Os01t0179700-02)	22719.3	K-LQIWDTAGQER-F	0000000000000	59	69	658.834	2	0.389487	2.24942e-05	5	Os01g0179700|AK069903LQIWDTAGQER0000000000000
AK069903	Os01g0179700	Similar to GTP-binding protein YPTM2. (Os01t0179700-01), Similar to GTP-binding protein YPTM2. (Os01t0179700-02)	22719.3	K-AFADEMGIPFMETSAK-N	000000300003000000	138	153	888.895	2	0.0764129	0.00670819	5	Os01g0179700|AK069903AFADEMGIPFMETSAK000000300003000000
AK069903	Os01g0179700	Similar to GTP-binding protein YPTM2. (Os01t0179700-01), Similar to GTP-binding protein YPTM2. (Os01t0179700-02)	22719.3	R-MASQPAASNARPPTVQIR-G	03000000000000000000	173	190	637.666	3	-1.3622	0.000292487	5	Os01g0179700|AK069903MASQPAASNARPPTVQIR03000000000000000000
AK120377	Os01g0180300	Lipoprotein, type 6 family protein. (Os01t0180300-01), Hypothetical conserved gene. (Os01t0180300-02)	84222.3	K-LGDVNILQEK-V	000000000000	276	285	564.817	2	0.217382	0.00170214	1	Os01g0180300|AK120377LGDVNILQEK000000000000
AK100676	Os01g0180800	Heat shock protein Hsp70 family protein. (Os01t0180800-01), Similar to heat shock 70 kDa protein 4. (Os01t0180800-02), Similar to heat shock 70 kDa protein 4. (Os01t0180800-03)	94114.4	R-FIGTAGAASSTMNPK-N	00000000000030000	47	61	734.86	2	1.54511	2.61992e-08	3	Os01g0180800|AK100676FIGTAGAASSTMNPK00000000000030000
AK100676	Os01g0180800	Heat shock protein Hsp70 family protein. (Os01t0180800-01), Similar to heat shock 70 kDa protein 4. (Os01t0180800-02), Similar to heat shock 70 kDa protein 4. (Os01t0180800-03)	94114.4	K-METDDAPNEAASGTDVNMQEAK-A	030000000000000000300000	516	537	1178.48	2	-2.16281	3.40408e-05	3	Os01g0180800|AK100676METDDAPNEAASGTDVNMQEAK030000000000000000300000
AK100676	Os01g0180800	Heat shock protein Hsp70 family protein. (Os01t0180800-01), Similar to heat shock 70 kDa protein 4. (Os01t0180800-02), Similar to heat shock 70 kDa protein 4. (Os01t0180800-03)	94114.4	K-APADAAADGAENGAPNSEEK-S	0000000000000000000000	538	557	942.912	2	-1.84867	0.00037112	3	Os01g0180800|AK100676APADAAADGAENGAPNSEEK0000000000000000000000
AK109424	Os01g0182200	Similar to cDNA clone:001-208-D07, full insert sequence. (Os01t0182200-01), Similar to Small basic membrane integral protein ZmSIP1-2. (Os01t0182200-02)	26318.9	R-HSSLFPLALR-F	000000000000	91	100	570.829	2	-1.27921	0.0347781	1	Os01g0182200|AK109424HSSLFPLALR000000000000
AK065131	Os01g0185300	Transferase family protein. (Os01t0185300-01), Similar to 3-N-debenzoyl-2-deoxytaxol N-benzoyltransferase. (Os01t0185300-02)	46633.6	R-ALVFFYPLAGR-I	0000000000000	67	77	627.356	2	1.00658	0.00785563	1	Os01g0185300|AK065131ALVFFYPLAGR0000000000000
AK099852	Os01g0187400	Conserved hypothetical protein. (Os01t0187400-01)	154266	K-ISASGGNGLAGGGGGR-V	000000000000000000	284	299	644.324	2	0.505166	8.40161e-05	2	Os01g0187400|AK099852ISASGGNGLAGGGGGR000000000000000000
AK099852	Os01g0187400	Conserved hypothetical protein. (Os01t0187400-01)	154266	R-ITGGILDSNSLR-T	00000000000000	1238	1249	623.345	2	2.44493	0.00262369	2	Os01g0187400|AK099852ITGGILDSNSLR00000000000000
AK101856	Os01g0191500	Similar to Mitochondrial processing peptidase. (Os01t0191500-01)	54196.9	K-RHGLDGQMLNVAIR-C	0000000030000000	13	26	798.437	2	14.1886	0.0412361	16	Os01g0191500|AK101856RHGLDGQMLNVAIR0000000030000000
AK101856	Os01g0191500	Similar to Mitochondrial processing peptidase. (Os01t0191500-01)	54196.9	K-MAYTTTTNR-S	03000000000	125	133	537.748	2	-0.0993029	1.80449e-05	16	Os01g0191500|AK101856MAYTTTTNR03000000000
AK101856	Os01g0191500	Similar to Mitochondrial processing peptidase. (Os01t0191500-01)	54196.9	K-MAYTTTTNR-S	00000000000	125	133	529.749	2	-2.34476	0.00976687	16	Os01g0191500|AK101856MAYTTTTNR00000000000
AK101856	Os01g0191500	Similar to Mitochondrial processing peptidase. (Os01t0191500-01)	54196.9	K-STYVGGEYR-R	00000000000	291	299	516.242	2	-1.95457	0.0126131	16	Os01g0191500|AK101856STYVGGEYR00000000000
AK101856	Os01g0191500	Similar to Mitochondrial processing peptidase. (Os01t0191500-01)	54196.9	K-DVHSNTGIFGIHTSTDAAFVPK-A	000000000000000000000000	372	393	772.048	3	-7.67948	0.000149967	16	Os01g0191500|AK101856DVHSNTGIFGIHTSTDAAFVPK000000000000000000000000
AK101856	Os01g0191500	Similar to Mitochondrial processing peptidase. (Os01t0191500-01)	54196.9	R-ELTSLATPGK-V	000000000000	401	410	508.785	2	0.0647322	0.0289154	16	Os01g0191500|AK101856ELTSLATPGK000000000000
AK101856	Os01g0191500	Similar to Mitochondrial processing peptidase. (Os01t0191500-01)	54196.9	R-ELTSLATPGKVDQTQLDR-A	00000000000000000000	401	418	658.017	3	1.09202	8.34058e-05	16	Os01g0191500|AK101856ELTSLATPGKVDQTQLDR00000000000000000000
AK101856	Os01g0191500	Similar to Mitochondrial processing peptidase. (Os01t0191500-01)	54196.9	K-VDQTQLDR-A	0000000000	411	418	487.749	2	1.07211	8.13724e-05	16	Os01g0191500|AK101856VDQTQLDR0000000000
AK101856	Os01g0191500	Similar to Mitochondrial processing peptidase. (Os01t0191500-01)	54196.9	K-SAILMNLESK-A	000003000000	425	434	561.298	2	1.32935	0.000143786	16	Os01g0191500|AK101856SAILMNLESK000003000000
AK101856	Os01g0191500	Similar to Mitochondrial processing peptidase. (Os01t0191500-01)	54196.9	K-SAILMNLESK-A	000000000000	425	434	553.299	2	-1.4667	0.00406679	16	Os01g0191500|AK101856SAILMNLESK000000000000
AK101856	Os01g0191500	Similar to Mitochondrial processing peptidase. (Os01t0191500-01)	54196.9	R-QILAFGER-K	0000000000	444	451	467.261	2	0.147351	0.0382349	16	Os01g0191500|AK101856QILAFGER0000000000
AK101856	Os01g0191500	Similar to Mitochondrial processing peptidase. (Os01t0191500-01)	54196.9	R-KPVEHLLK-A	0000000000	452	459	482.303	2	0.755207	0.00885179	16	Os01g0191500|AK101856KPVEHLLK0000000000
AK101856	Os01g0191500	Similar to Mitochondrial processing peptidase. (Os01t0191500-01)	54196.9	K-AVDGVTLKDITALAEK-I	000000000000000000	460	475	822.462	2	-3.39478	8.93374e-08	16	Os01g0191500|AK101856AVDGVTLKDITALAEK000000000000000000
AK101856	Os01g0191500	Similar to Mitochondrial processing peptidase. (Os01t0191500-01)	54196.9	K-IISSPLTMASHGNVLNVPTYDSVSGK-F	0000000030000000000000000000	476	501	901.791	3	-3.04018	2.2234e-05	16	Os01g0191500|AK101856IISSPLTMASHGNVLNVPTYDSVSGK0000000030000000000000000000
AK121093	Os01g0191700	Similar to Pyrophosphate-fructose-6-phosphate 1-phosphotransferase-like protein (Pyrophosphate-dependent phosphofructo-1-kinase-like protein). (Os01t0191700-01)	58514.8	K-SFGFDTAVEEAQR-A	000000000000000	264	276	728.843	2	5.29081	0.000430667	2	Os01g0191700|AK121093SFGFDTAVEEAQR000000000000000
AK121093	Os01g0191700	Similar to Pyrophosphate-fructose-6-phosphate 1-phosphotransferase-like protein (Pyrophosphate-dependent phosphofructo-1-kinase-like protein). (Os01t0191700-01)	58514.8	K-YIDPTYMIR-A	00000003000	406	414	594.294	2	3.342	0.0140739	2	Os01g0191700|AK121093YIDPTYMIR00000003000
AK064472	Os01g0193900	Myb, DNA-binding domain containing protein. (Os01t0193900-01), Hypothetical conserved gene. (Os01t0193900-02)	94555.3	R-SSLGKPRR-F	0000000000	486	493	450.766	2	-13.0452	0.0172969	1	Os01g0193900|AK064472SSLGKPRR0000000000
AK070619	Os01g0195500	Translation initiation factor SUI1 domain containing protein. (Os01t0195500-01)	21632.2	M-AAEKPAPVR-V	10000000000	2	10	490.779	2	-1.39898	0.00757672	1	Os01g0195500|AK070619AAEKPAPVR10000000000
J100062J10	Os01g0196500	Prenylated rab acceptor PRA1 family protein. (Os01t0196500-01)	21235.5	R-ELADPHALGLPPSLADAYLR-V	0000000000000000000000	56	75	707.045	3	0.440645	0.000473352	1	Os01g0196500|J100062J10ELADPHALGLPPSLADAYLR0000000000000000000000
U25430	Os01g0196600	Similar to 260 kDa major acidic fibroblast growth factor-stimulated phosphoprotein (Fragment). (Os01t0196600-01)	52449.5	R-LIAGLEER-G	0000000000	281	288	450.76	2	-1.82726	0.00253243	1	Os01g0196600|U25430LIAGLEER0000000000
AK067763	Os01g0205500	Similar to 60S ribosomal protein L11-2 (L16). Splice isoform 2. (Os01t0205500-01)	21020.1	K-VLEQLSGQSPVFSK-A	0000000000000000	38	51	759.912	2	0.307522	4.51292e-05	2	Os01g0205500|AK067763VLEQLSGQSPVFSK0000000000000000
AK067763	Os01g0205500	Similar to 60S ribosomal protein L11-2 (L16). Splice isoform 2. (Os01t0205500-01)	21020.1	K-AMQLLESGLK-V	003000000000	78	87	553.302	2	3.91388	0.000160418	2	Os01g0205500|AK067763AMQLLESGLK003000000000
AK066635	Os01g0208700	Similar to Phosphoenolpyruvate carboxylase (Fragment). (Os01t0208700-01)	115049	R-TPPTPQDEMR-A	000000000300	274	283	594.272	2	1.28427	0.0273432	1	Os01g0208700|AK066635TPPTPQDEMR000000000300
AK103145	Os01g0209200	Similar to 14-3-3 protein 7. (Os01t0209200-01)	29070.4	K-DSTLIMQLLR-D	000000300000	216	225	603.332	2	1.4098	8.61875e-06	1	Os01g0209200|AK103145DSTLIMQLLR000000300000
AK060099	Os01g0210600	Protein of unknown function DUF538 family protein. (Os01t0210600-01), Protein of unknown function DUF538 family protein. (Os01t0210600-02)	18210.5	R-ATGFVWLR-Q	0000000000	53	60	475.267	2	1.49598	0.00115451	1	Os01g0210600|AK060099ATGFVWLR0000000000
AK066468	Os01g0212400	EF-Hand type domain containing protein. (Os01t0212400-01)	63920.5	K-GFSLTGTGISTDVQTSYAAR-I	0000000000000000000000	198	217	1016.5	2	2.10661	2.07158e-09	9	Os01g0212400|AK066468GFSLTGTGISTDVQTSYAAR0000000000000000000000
AK066468	Os01g0212400	EF-Hand type domain containing protein. (Os01t0212400-01)	63920.5	R-HAQMEALGR-L	00003000000	289	297	514.751	2	0.964597	0.00028895	9	Os01g0212400|AK066468HAQMEALGR00003000000
AK066468	Os01g0212400	EF-Hand type domain containing protein. (Os01t0212400-01)	63920.5	R-HAQMEALGR-L	00000000000	289	297	506.753	2	-0.596737	0.0273905	9	Os01g0212400|AK066468HAQMEALGR00000000000
AK066468	Os01g0212400	EF-Hand type domain containing protein. (Os01t0212400-01)	63920.5	R-LLNEDGTPNEDVIK-K	0000000000000000	298	311	778.894	2	0.922551	2.97438e-08	9	Os01g0212400|AK066468LLNEDGTPNEDVIK0000000000000000
AK066468	Os01g0212400	EF-Hand type domain containing protein. (Os01t0212400-01)	63920.5	R-LLNEDGTPNEDVIKK-L	00000000000000000	298	312	842.941	2	-0.294449	0.000552515	9	Os01g0212400|AK066468LLNEDGTPNEDVIKK00000000000000000
AK066468	Os01g0212400	EF-Hand type domain containing protein. (Os01t0212400-01)	63920.5	K-LFHKIDMDESQTLSR-A	00000003000000000	313	327	612.636	3	-0.996234	0.02081	9	Os01g0212400|AK066468LFHKIDMDESQTLSR00000003000000000
AK066468	Os01g0212400	EF-Hand type domain containing protein. (Os01t0212400-01)	63920.5	K-IDMDESQTLSR-A	0003000000000	317	327	655.799	2	0.382913	9.31759e-07	9	Os01g0212400|AK066468IDMDESQTLSR0003000000000
AK066468	Os01g0212400	EF-Hand type domain containing protein. (Os01t0212400-01)	63920.5	R-SVPTSGAYSNK-F	0000000000000	384	394	555.775	2	0.946508	0.00713076	9	Os01g0212400|AK066468SVPTSGAYSNK0000000000000
AK066468	Os01g0212400	EF-Hand type domain containing protein. (Os01t0212400-01)	63920.5	R-TRQEHDLLVDR-S	0000000000000	403	413	461.245	3	1.11339	0.000965519	9	Os01g0212400|AK066468TRQEHDLLVDR0000000000000
AK099424	Os01g0217100	Conserved hypothetical protein. (Os01t0217100-01)	19528.2	R-LSPSAAGSVEK-R	0000000000000	167	177	523.285	2	9.79224	0.0341525	1	Os01g0217100|AK099424LSPSAAGSVEK0000000000000
AK072778	Os01g0222500	Similar to Vacuolar ATP synthase subunit E (EC 3.6.3.14) (V-ATPase E subunit) (Vacuolar proton pump E subunit). (Os01t0222500-01)	26586	R-IFIVQSLLR-L	00000000000	117	125	544.846	2	1.25858	0.00252529	2	Os01g0222500|AK072778IFIVQSLLR00000000000
AK072778	Os01g0222500	Similar to Vacuolar ATP synthase subunit E (EC 3.6.3.14) (V-ATPase E subunit) (Vacuolar proton pump E subunit). (Os01t0222500-01)	26586	R-LKEPAVILR-C	00000000000	126	134	519.837	2	0.657585	0.0425839	2	Os01g0222500|AK072778LKEPAVILR00000000000
AK072778	Os01g0222500	Similar to Vacuolar ATP synthase subunit E (EC 3.6.3.14) (V-ATPase E subunit) (Vacuolar proton pump E subunit). (Os01t0222500-01)	26586	K-IVCENTLDAR-L	000000000000	200	209	602.802	2	-2.00643	8.20676e-06	2	Os01g0222500|AK072778IVCENTLDAR000000000000
J065195O03	Os01g0224300	CHCH domain containing protein. (Os01t0224300-01)	7617.81	K-FSLAEASSTGTSETPK-G	000000000000000000	53	68	806.888	2	-1.28668	0.000185445	1	Os01g0224300|J065195O03FSLAEASSTGTSETPK000000000000000000
Os01g0225000	Os01g0225000	Mitochondrial carrier protein domain containing protein. (Os01t0225000-00)	34824	R-LQQPPPPASPGITAAPGRPASAASLLR-G	00000000000000000000000000000	40	66	874.489	3	-0.359034	0.0250452	3	Os01g0225000|Os01g0225000LQQPPPPASPGITAAPGRPASAASLLR00000000000000000000000000000
Os01g0225000	Os01g0225000	Mitochondrial carrier protein domain containing protein. (Os01t0225000-00)	34824	R-AEGPSALYR-G	00000000000	71	79	482.249	2	1.54266	0.0086902	3	Os01g0225000|Os01g0225000AEGPSALYR00000000000
Os01g0225000	Os01g0225000	Mitochondrial carrier protein domain containing protein. (Os01t0225000-00)	34824	R-FLASSSNDQR-L	000000000000	307	316	562.769	2	-2.42915	0.0300269	3	Os01g0225000|Os01g0225000FLASSSNDQR000000000000
AK070320	Os01g0227300	Similar to RAB7D. (Os01t0227300-01)	23548.7	K-VIILGDSGVGK-T	0000000000000	11	21	529.316	2	-0.482724	0.000482785	4	Os01g0227300|AK070320VIILGDSGVGK0000000000000
AK070320	Os01g0227300	Similar to RAB7D. (Os01t0227300-01)	23548.7	K-TSLMNQYVNK-K	000030000000	22	31	607.299	2	1.65377	0.00500505	4	Os01g0227300|AK070320TSLMNQYVNK000030000000
AK070320	Os01g0227300	Similar to RAB7D. (Os01t0227300-01)	23548.7	R-LFTLQIWDTAGQER-F	0000000000000000	56	69	839.436	2	3.65818	0.00896099	4	Os01g0227300|AK070320LFTLQIWDTAGQER0000000000000000
AK070320	Os01g0227300	Similar to RAB7D. (Os01t0227300-01)	23548.7	R-FQSLGVAFYR-G	000000000000	70	79	594.315	2	1.33793	4.40305e-05	4	Os01g0227300|AK070320FQSLGVAFYR000000000000
AB029508	Os01g0229400	Similar to Rac-like GTP-binding protein 1. (Os01t0229400-01)	24199.5	R-LRPLSYR-G	000000000	74	80	452.772	2	-0.593901	0.0489774	1	Os01g0229400|AB029508LRPLSYR000000000
AK107453	Os01g0231700	Similar to 60S acidic ribosomal protein P2-B (CaRP2B). (Os01t0231700-01)	11939.8	K-QLKGELEASAATPYELQR-R	20000000000000000000	19	36	994.01	2	0.273864	0.00387535	2	Os01g0231700|AK107453QLKGELEASAATPYELQR20000000000000000000
AK107453	Os01g0231700	Similar to 60S acidic ribosomal protein P2-B (CaRP2B). (Os01t0231700-01)	11939.8	K-GELEASAATPYELQR-R	00000000000000000	22	36	817.903	2	-1.60945	0.000207146	2	Os01g0231700|AK107453GELEASAATPYELQR00000000000000000
AK069592	Os01g0232100	Similar to Tonoplast membrane integral protein ZmTIP4-3. (Os01t0232100-01)	25866.6	R-AAPPGTGPLLTGLLVGANTVAGGALTGASMNPAR-S	000000000000000000000000000000300000	171	204	773.165	4	-0.539285	0.000362408	1	Os01g0232100|AK069592AAPPGTGPLLTGLLVGANTVAGGALTGASMNPAR000000000000000000000000000000300000
AK065256	Os01g0233000	DREPP plasma membrane polypeptide family protein. (Os01t0233000-01)	21787.5	K-VVEVVESSPPEIK-A	000000000000000	53	65	706.391	2	4.90741	6.4218e-05	1	Os01g0233000|AK065256VVEVVESSPPEIK000000000000000
AK105595	Os01g0235400	Similar to predicted protein. (Os01t0235400-01), Similar to Importin-alpha re-exporter (Cellular apoptosis susceptibility protein homolog). (Os01t0235400-02)	60328.8	R-FGPIIEQNVDPANK-G	0000000000000000	514	527	771.403	2	1.8151	0.000408802	1	Os01g0235400|AK105595FGPIIEQNVDPANK0000000000000000
AK073776	Os01g0238600	Nucleic acid-binding, OB-fold domain containing protein. (Os01t0238600-01)	15243.1	M-STPAAGEKPALR-K	10000000000000	2	13	620.339	2	0.662271	0.00217401	6	Os01g0238600|AK073776STPAAGEKPALR10000000000000
AK073776	Os01g0238600	Nucleic acid-binding, OB-fold domain containing protein. (Os01t0238600-01)	15243.1	K-VDQLKPVTSGHTLTVK-V	000000000000000000	20	35	574.995	3	-2.89582	0.00887618	6	Os01g0238600|AK073776VDQLKPVTSGHTLTVK000000000000000000
AK073776	Os01g0238600	Nucleic acid-binding, OB-fold domain containing protein. (Os01t0238600-01)	15243.1	K-VVSATPVPGR-A	000000000000	36	45	491.786	2	-2.89878	7.14868e-05	6	Os01g0238600|AK073776VVSATPVPGR000000000000
AK073776	Os01g0238600	Nucleic acid-binding, OB-fold domain containing protein. (Os01t0238600-01)	15243.1	R-NEQVDLLKPGATVIMR-N	000000000000000300	77	92	900.489	2	1.17749	0.000931698	6	Os01g0238600|AK073776NEQVDLLKPGATVIMR000000000000000300
AK073776	Os01g0238600	Nucleic acid-binding, OB-fold domain containing protein. (Os01t0238600-01)	15243.1	R-IEATEPASFTVK-E	00000000000000	113	124	646.841	2	1.71182	0.00839598	6	Os01g0238600|AK073776IEATEPASFTVK00000000000000
Os01g0239100	Os01g0239100	Heat shock protein DnaJ family protein. (Os01t0239100-01), Heat shock protein DnaJ family protein. (Os01t0239100-02)	38514.6	K-ISLVEALTGYTAR-I	000000000000000	269	281	697.387	2	-0.825464	0.0293099	1	Os01g0239100|Os01g0239100ISLVEALTGYTAR000000000000000
AK067756	Os01g0242600	C2 calcium-dependent membrane targeting domain containing protein. (Os01t0242600-01), C2 calcium-dependent membrane targeting domain containing protein. (Os01t0242600-02)	75615.6	R-ARNPDTEIYK-E	000000000000	479	488	603.806	2	-5.87867	0.0185081	1	Os01g0242600|AK067756ARNPDTEIYK000000000000
AK072762	Os01g0248400	Similar to Isocitrate dehydrogenase (Fragment). (Os01t0248400-01)	46967	R-HAFGDQYR-A	0000000000	135	142	497.229	2	-2.24592	0.0121442	8	Os01g0248400|AK072762HAFGDQYR0000000000
AK072762	Os01g0248400	Similar to Isocitrate dehydrogenase (Fragment). (Os01t0248400-01)	46967	R-LIDDMVAYALK-S	0000030000000	250	260	634.335	2	1.42758	0.000796824	8	Os01g0248400|AK072762LIDDMVAYALK0000030000000
AK072762	Os01g0248400	Similar to Isocitrate dehydrogenase (Fragment). (Os01t0248400-01)	46967	R-TIEAEAAHGTVTR-H	000000000000000	302	314	678.349	2	-1.18789	9.72056e-08	8	Os01g0248400|AK072762TIEAEAAHGTVTR000000000000000
AK100105	Os01g0251000	Conserved hypothetical protein. (Os01t0251000-01)	51871.8	R-LDISSGSLFLR-G	0000000000000	354	364	604.338	2	0.528623	7.98643e-05	1	Os01g0251000|AK100105LDISSGSLFLR0000000000000
AK068233	Os01g0253300	Importin alpha-1a subunit. (Os01t0253300-01), Importin alpha-1a subunit. (Os01t0253300-02)	58316.1	R-EGLQAQAPVPASAATGVDK-K	000000000000000000000	51	69	905.471	2	-0.190848	8.44161e-05	4	Os01g0253300|AK068233EGLQAQAPVPASAATGVDK000000000000000000000
AK068233	Os01g0253300	Importin alpha-1a subunit. (Os01t0253300-01), Importin alpha-1a subunit. (Os01t0253300-02)	58316.1	R-SPPIEEVIQSGVVPR-F	00000000000000000	105	119	803.942	2	-2.33058	8.24274e-05	4	Os01g0253300|AK068233SPPIEEVIQSGVVPR00000000000000000
AK068233	Os01g0253300	Importin alpha-1a subunit. (Os01t0253300-01), Importin alpha-1a subunit. (Os01t0253300-02)	58316.1	K-EAAWAISNATSGGSHDQIK-Y	000000000000000000000	388	406	648.31	3	-5.06839	0.0439345	4	Os01g0253300|AK068233EAAWAISNATSGGSHDQIK000000000000000000000
AK068233	Os01g0253300	Importin alpha-1a subunit. (Os01t0253300-01), Importin alpha-1a subunit. (Os01t0253300-02)	58316.1	K-IENLQSHDNNEIYEK-A	00000000000000000	470	484	615.957	3	-3.26707	0.0107999	4	Os01g0253300|AK068233IENLQSHDNNEIYEK00000000000000000
AK058837	Os01g0253600	Replication factor A protein 3 domain containing protein. (Os01t0253600-01)	11499.8	R-TVVQAQREEGGLLIGQSTDGHQLTIK-G	0000000000000000000000000000	25	50	926.829	3	-0.936228	6.12503e-05	1	Os01g0253600|AK058837TVVQAQREEGGLLIGQSTDGHQLTIK0000000000000000000000000000
AY620417	Os01g0254000	Similar to NTGB2 (Fragment). (Os01t0254000-01)	22001.4	K-ILFLGLDNAGK-T	0000000000000	23	33	580.838	2	2.02201	0.000154104	2	Os01g0254000|AY620417ILFLGLDNAGK0000000000000
AY620417	Os01g0254000	Similar to NTGB2 (Fragment). (Os01t0254000-01)	22001.4	K-AFDLGGHQIAR-R	0000000000000	68	78	592.813	2	1.67222	0.000187731	2	Os01g0254000|AY620417AFDLGGHQIAR0000000000000
AK100819	Os01g0256900	Similar to SmX6 protein. (Os01t0256900-01)	15931.1	--MLPLSLLK-T	0300000000	1	8	465.789	2	1.98909	0.0143249	2	Os01g0256900|AK100819MLPLSLLK0300000000
AK100819	Os01g0256900	Similar to SmX6 protein. (Os01t0256900-01)	15931.1	R-VPDEVIDKVQEETSK-S	00000000000000000	71	85	572.629	3	1.16741	0.0182837	2	Os01g0256900|AK100819VPDEVIDKVQEETSK00000000000000000
J075061L04	Os01g0258600	Similar to predicted protein. (Os01t0258600-00)	11207.8	K-TVGGSVSTDPSQPVVK-K	000000000000000000	17	32	779.406	2	-5.07039	3.26439e-06	1	Os01g0258600|J075061L04TVGGSVSTDPSQPVVK000000000000000000
J013050F24	Os01g0260700	Similar to PUR ALPHA-1. (Os01t0260700-01)	32455.1	R-NVLLEINNEASR-L	00000000000000	118	129	686.366	2	1.83379	0.00017976	2	Os01g0260700|J013050F24NVLLEINNEASR00000000000000
J013050F24	Os01g0260700	Similar to PUR ALPHA-1. (Os01t0260700-01)	32455.1	R-ISEVAGADR-S	00000000000	246	254	459.239	2	2.9256	0.0426875	2	Os01g0260700|J013050F24ISEVAGADR00000000000
015-032-F01	Os01g0264600	Conserved hypothetical protein. (Os01t0264600-00)	53828.2	K-LQMGGANGGGGAAAAAASAHRGK-K	0003000000000000000000000	115	137	998.989	2	-1.4675	0.0420022	1	Os01g0264600|015-032-F01LQMGGANGGGGAAAAAASAHRGK0003000000000000000000000
AK067217	Os01g0265100	Similar to ADP-ribosylation factor. (Os01t0265100-01)	20754.8	R-ILMVGLDAAGK-T	0003000000000	20	30	552.31	2	-0.825023	2.25655e-06	12	Os01g0265100|AK067217ILMVGLDAAGK0003000000000
AK067217	Os01g0265100	Similar to ADP-ribosylation factor. (Os01t0265100-01)	20754.8	K-LGEIVTTIPTIGFNVETVEYK-N	00000000000000000000000	39	59	1162.12	2	-1.44352	0.0174408	12	Os01g0265100|AK067217LGEIVTTIPTIGFNVETVEYK00000000000000000000000
AK067217	Os01g0265100	Similar to ADP-ribosylation factor. (Os01t0265100-01)	20754.8	K-NISFTVWDVGGQDK-I	0000000000000000	60	73	783.381	2	-2.428	7.24207e-06	12	Os01g0265100|AK067217NISFTVWDVGGQDK0000000000000000
AK067217	Os01g0265100	Similar to ADP-ribosylation factor. (Os01t0265100-01)	20754.8	R-HYFQNTQGLIFVVDSNDR-D	00000000000000000000	80	97	718.351	3	-1.69642	0.0024861	12	Os01g0265100|AK067217HYFQNTQGLIFVVDSNDR00000000000000000000
AK067217	Os01g0265100	Similar to ADP-ribosylation factor. (Os01t0265100-01)	20754.8	R-HYFQNTQGLIFVVDSNDRDR-V	0000000000000000000000	80	99	808.726	3	-1.71373	0.0158432	12	Os01g0265100|AK067217HYFQNTQGLIFVVDSNDRDR0000000000000000000000
AK067217	Os01g0265100	Similar to ADP-ribosylation factor. (Os01t0265100-01)	20754.8	R-MLNEDELR-D	0300000000	110	117	518.242	2	-1.09966	0.0124435	12	Os01g0265100|AK067217MLNEDELR0300000000
AK067217	Os01g0265100	Similar to ADP-ribosylation factor. (Os01t0265100-01)	20754.8	R-DAVLLVFANK-Q	000000000000	118	127	545.319	2	0.148263	0.000311777	12	Os01g0265100|AK067217DAVLLVFANK000000000000
AK067217	Os01g0265100	Similar to ADP-ribosylation factor. (Os01t0265100-01)	20754.8	K-QDLPNAMNAAEITDK-L	00000000000000000	128	142	815.891	2	0.237483	6.638e-11	12	Os01g0265100|AK067217QDLPNAMNAAEITDK00000000000000000
AK067217	Os01g0265100	Similar to ADP-ribosylation factor. (Os01t0265100-01)	20754.8	K-QDLPNAMNAAEITDK-L	00000003000000000	128	142	823.888	2	0.126683	7.78769e-09	12	Os01g0265100|AK067217QDLPNAMNAAEITDK00000003000000000
AK067217	Os01g0265100	Similar to ADP-ribosylation factor. (Os01t0265100-01)	20754.8	K-QDLPNAMNAAEITDK-L	20000003000000000	128	142	815.375	2	0.235184	6.66674e-05	12	Os01g0265100|AK067217QDLPNAMNAAEITDK20000003000000000
AK067217	Os01g0265100	Similar to ADP-ribosylation factor. (Os01t0265100-01)	20754.8	K-QDLPNAMNAAEITDKLGLHSLR-Q	000000030000000000000000	128	149	606.564	4	0.427521	5.70768e-05	12	Os01g0265100|AK067217QDLPNAMNAAEITDKLGLHSLR000000030000000000000000
AK099896	Os01g0265800	Similar to Sulfated surface glycoprotein 185 precursor (SSG 185). (Os01t0265800-01), RNA-binding region RNP-1 (RNA recognition motif) domain containing protein. (Os01t0265800-02)	53112.8	R-AADADPALR-K	00000000000	182	190	450.229	2	-7.7487	0.0187907	2	Os01g0265800|AK099896AADADPALR00000000000
AK099896	Os01g0265800	Similar to Sulfated surface glycoprotein 185 precursor (SSG 185). (Os01t0265800-01), RNA-binding region RNP-1 (RNA recognition motif) domain containing protein. (Os01t0265800-02)	53112.8	K-YGEIEEGPLGLDK-V	000000000000000	324	336	710.351	2	-3.55235	6.70415e-05	2	Os01g0265800|AK099896YGEIEEGPLGLDK000000000000000
AK069749	Os01g0266600	Thioredoxin fold domain containing protein. (Os01t0266600-01)	21002.8	K-AFNVEVAPSDFK-V	00000000000000	176	187	662.333	2	0.137938	0.0212089	2	Os01g0266600|AK069749AFNVEVAPSDFK00000000000000
AK069749	Os01g0266600	Thioredoxin fold domain containing protein. (Os01t0266600-01)	21002.8	K-VSGAEVILDQI--	0000000000000	188	198	572.316	2	0.0758733	0.000172657	2	Os01g0266600|AK069749VSGAEVILDQI0000000000000
AK069474	Os01g0266800	Cystinosin/ERS1p repeat containing protein. (Os01t0266800-01)	46580.9	R-HVPDEPDSADKV--	00000000000000	409	420	654.806	2	-1.87325	0.00497086	1	Os01g0266800|AK069474HVPDEPDSADKV00000000000000
AK099455	Os01g0267200	Similar to 26S proteasome non-ATPase regulatory subunit 14 (26S proteasome regulatory subunit rpn11). (Os01t0267200-01)	34387.6	R-AVAVVIDPIQSVK-G	000000000000000	138	150	669.905	2	2.54355	0.00124607	3	Os01g0267200|AK099455AVAVVIDPIQSVK000000000000000
AK099455	Os01g0267200	Similar to 26S proteasome non-ATPase regulatory subunit 14 (26S proteasome regulatory subunit rpn11). (Os01t0267200-01)	34387.6	R-HYYSIAINYR-K	000000000000	197	206	650.328	2	0.933466	0.00412407	3	Os01g0267200|AK099455HYYSIAINYR000000000000
AK099455	Os01g0267200	Similar to 26S proteasome non-ATPase regulatory subunit 14 (26S proteasome regulatory subunit rpn11). (Os01t0267200-01)	34387.6	K-TNEQTVQEMLNLAIK-Y	00000000030000000	238	252	874.447	2	-1.80706	0.0075055	3	Os01g0267200|AK099455TNEQTVQEMLNLAIK00000000030000000
Os01g0267600	Os01g0267600	Sad1/UNC-like, C-terminal domain containing protein. (Os01t0267600-01)	48613	R-WQTALSVAAK-N	000000000000	95	104	537.8	2	-1.28153	0.0177258	10	Os01g0267600|Os01g0267600WQTALSVAAK000000000000
Os01g0267600	Os01g0267600	Sad1/UNC-like, C-terminal domain containing protein. (Os01t0267600-01)	48613	R-VADVEASLAR-A	000000000000	143	152	515.78	2	-0.181893	9.76087e-05	10	Os01g0267600|Os01g0267600VADVEASLAR000000000000
Os01g0267600	Os01g0267600	Sad1/UNC-like, C-terminal domain containing protein. (Os01t0267600-01)	48613	R-MLQVQLEAVDR-K	0300000000000	156	166	659.346	2	1.24252	4.06683e-08	10	Os01g0267600|Os01g0267600MLQVQLEAVDR0300000000000
Os01g0267600	Os01g0267600	Sad1/UNC-like, C-terminal domain containing protein. (Os01t0267600-01)	48613	R-GELAALLEEK-R	000000000000	177	186	536.797	2	-1.35551	1.34535e-05	10	Os01g0267600|Os01g0267600GELAALLEEK000000000000
Os01g0267600	Os01g0267600	Sad1/UNC-like, C-terminal domain containing protein. (Os01t0267600-01)	48613	R-ADDLSDALGALKR-M	000000000000000	201	213	672.864	2	6.49975	0.0335181	10	Os01g0267600|Os01g0267600ADDLSDALGALKR000000000000000
Os01g0267600	Os01g0267600	Sad1/UNC-like, C-terminal domain containing protein. (Os01t0267600-01)	48613	K-ESLGSGPGTEVDLDQVR-A	0000000000000000000	231	247	879.929	2	0.580632	3.61839e-07	10	Os01g0267600|Os01g0267600ESLGSGPGTEVDLDQVR0000000000000000000
Os01g0267600	Os01g0267600	Sad1/UNC-like, C-terminal domain containing protein. (Os01t0267600-01)	48613	R-VDYAVASAGGK-V	0000000000000	269	279	519.267	2	0.679448	1.11896e-06	10	Os01g0267600|Os01g0267600VDYAVASAGGK0000000000000
Os01g0267600	Os01g0267600	Sad1/UNC-like, C-terminal domain containing protein. (Os01t0267600-01)	48613	R-GGFFSSLLSGDTAASPK-K	0000000000000000000	293	309	821.411	2	1.2141	2.09806e-06	10	Os01g0267600|Os01g0267600GGFFSSLLSGDTAASPK0000000000000000000
Os01g0267600	Os01g0267600	Sad1/UNC-like, C-terminal domain containing protein. (Os01t0267600-01)	48613	R-KGIVPDAITLEHVSK-D	00000000000000000	338	352	536.311	3	1.64707	0.00735215	10	Os01g0267600|Os01g0267600KGIVPDAITLEHVSK00000000000000000
Os01g0267600	Os01g0267600	Sad1/UNC-like, C-terminal domain containing protein. (Os01t0267600-01)	48613	R-VHGHEPVSPGMSVSQS--	000000000003000000	440	455	550.923	3	-0.153401	0.0392946	10	Os01g0267600|Os01g0267600VHGHEPVSPGMSVSQS000000000003000000
AK102391	Os01g0268300	Similar to DNA gyrase B subunit. (Os01t0268300-01), Similar to DNA gyrase subunit B, chloroplastic/mitochondrial. (Os01t0268300-02)	80916	K-VPNPEFEGQTK-T	0000000000000	419	429	623.309	2	-0.373208	0.00377519	1	Os01g0268300|AK102391VPNPEFEGQTK0000000000000
AK067610	Os01g0269100	Similar to Rab proteins geranylgeranyltransferase component A 2 (Rab escort protein 2) (REP-2) (Choroideraemia-like protein). (Os01t0269100-01)	34758.3	R-QNLSPKMR-A	0000000000	234	241	487.268	2	4.02641	0.027309	1	Os01g0269100|AK067610QNLSPKMR0000000000
AK119511	Os01g0270100	Similar to Cysteine protease inhibitor. (Os01t0270100-01), Similar to cDNA clone:001-200-C04, full insert sequence. (Os01t0270100-02)	27252.2	R-FAVDEHNKR-E	00000000000	69	77	558.284	2	0.685689	0.000741862	8	Os01g0270100|AK119511FAVDEHNKR00000000000
AK119511	Os01g0270100	Similar to Cysteine protease inhibitor. (Os01t0270100-01), Similar to cDNA clone:001-200-C04, full insert sequence. (Os01t0270100-02)	27252.2	R-ENALLEFVR-V	00000000000	78	86	545.797	2	-1.41275	0.0067678	8	Os01g0270100|AK119511ENALLEFVR00000000000
AK119511	Os01g0270100	Similar to Cysteine protease inhibitor. (Os01t0270100-01), Similar to cDNA clone:001-200-C04, full insert sequence. (Os01t0270100-02)	27252.2	K-EQVVAGTLHHLTLEALEAGR-K	0000000000000000000000	92	111	715.387	3	0.498794	0.0133802	8	Os01g0270100|AK119511EQVVAGTLHHLTLEALEAGR0000000000000000000000
AK119511	Os01g0270100	Similar to Cysteine protease inhibitor. (Os01t0270100-01), Similar to cDNA clone:001-200-C04, full insert sequence. (Os01t0270100-02)	27252.2	R-NTGDATTFTNADLGAK-K	000000000000000000	135	150	798.879	2	0.706975	1.39007e-08	8	Os01g0270100|AK119511NTGDATTFTNADLGAK000000000000000000
AK119511	Os01g0270100	Similar to Cysteine protease inhibitor. (Os01t0270100-01), Similar to cDNA clone:001-200-C04, full insert sequence. (Os01t0270100-02)	27252.2	R-AKAEVVEDFAK-F	0000000000000	197	207	603.821	2	-1.25077	0.00104822	8	Os01g0270100|AK119511AKAEVVEDFAK0000000000000
AK119511	Os01g0270100	Similar to Cysteine protease inhibitor. (Os01t0270100-01), Similar to cDNA clone:001-200-C04, full insert sequence. (Os01t0270100-02)	27252.2	K-NLEGAFVLNQMQQEHDESSSQ--	00000000000300000000000	230	250	1204.03	2	1.32776	0.0176937	8	Os01g0270100|AK119511NLEGAFVLNQMQQEHDESSSQ00000000000300000000000
J100075O07	Os01g0273000	Similar to 26 proteasome complex subunit DSS1 (Deleted in split hand/split foot protein 1) (Split hand/foot deleted protein 1). (Os01t0273000-01)	8922.84	K-ELEECNTQKI--	000000000000	67	76	639.305	2	-1.31967	0.0212448	1	Os01g0273000|J100075O07ELEECNTQKI000000000000
AK064813	Os01g0275600	Similar to Argonaute 4 protein. (Os01t0275600-01), Similar to Protein argonaute 4A. (Os01t0275600-02)	101783	K-YEDDRPVDGK-G	000000000000	79	88	597.276	2	1.28869	0.000383463	8	Os01g0275600|AK064813YEDDRPVDGK000000000000
AK064813	Os01g0275600	Similar to Argonaute 4 protein. (Os01t0275600-01), Similar to Protein argonaute 4A. (Os01t0275600-02)	101783	K-IPMSAIAQALR-G	0003000000000	182	192	593.835	2	0.892673	0.0193863	8	Os01g0275600|AK064813IPMSAIAQALR0003000000000
AK064813	Os01g0275600	Similar to Argonaute 4 protein. (Os01t0275600-01), Similar to Protein argonaute 4A. (Os01t0275600-02)	101783	R-GQESENTQEAIR-V	00000000000000	193	204	681.316	2	-3.62658	2.54949e-05	8	Os01g0275600|AK064813GQESENTQEAIR00000000000000
AK064813	Os01g0275600	Similar to Argonaute 4 protein. (Os01t0275600-01), Similar to Protein argonaute 4A. (Os01t0275600-02)	101783	R-IKTSPANTEYK-I	0000000000000	305	315	626.334	2	2.60862	0.022674	8	Os01g0275600|AK064813IKTSPANTEYK0000000000000
AK064813	Os01g0275600	Similar to Argonaute 4 protein. (Os01t0275600-01), Similar to Protein argonaute 4A. (Os01t0275600-02)	101783	R-VNDQYITNVLLK-I	00000000000000	594	605	710.395	2	-0.920013	0.0080139	8	Os01g0275600|AK064813VNDQYITNVLLK00000000000000
AK064813	Os01g0275600	Similar to Argonaute 4 protein. (Os01t0275600-01), Similar to Protein argonaute 4A. (Os01t0275600-02)	101783	R-ELLVDFYTSTGK-R	00000000000000	700	711	686.854	2	0.994385	0.0415444	8	Os01g0275600|AK064813ELLVDFYTSTGK00000000000000
AK058917	Os01g0276000	Similar to 60S ribosomal protein L30. (Os01t0276000-01), Similar to 60S ribosomal protein L30. (Os01t0276000-02)	12639.6	K-SEIEYYAMLAK-V	0000000030000	58	68	667.321	2	-0.222944	0.00116718	1	Os01g0276000|AK058917SEIEYYAMLAK0000000030000
AK059596	Os01g0276100	Similar to 3-isopropylmalate dehydrogenase, chloroplast precursor (EC 1.1.1.85) (Beta-IPM dehydrogenase) (IMDH) (3-IPM-DH). (Os01t0276100-01)	40056.6	R-ATLFPGDGIGPEIAESVK-Q	00000000000000000000	34	51	900.974	2	2.02942	0.00106255	3	Os01g0276100|AK059596ATLFPGDGIGPEIAESVK00000000000000000000
AK059596	Os01g0276100	Similar to 3-isopropylmalate dehydrogenase, chloroplast precursor (EC 1.1.1.85) (Beta-IPM dehydrogenase) (IMDH) (3-IPM-DH). (Os01t0276100-01)	40056.6	R-YDDVNLVTIR-E	000000000000	137	146	604.324	2	7.18366	0.00155505	3	Os01g0276100|AK059596YDDVNLVTIR000000000000
AK059596	Os01g0276100	Similar to 3-isopropylmalate dehydrogenase, chloroplast precursor (EC 1.1.1.85) (Beta-IPM dehydrogenase) (IMDH) (3-IPM-DH). (Os01t0276100-01)	40056.6	R-ENTEGEYSGLEHQVVR-G	000000000000000000	147	162	616.292	3	2.51525	0.0163033	3	Os01g0276100|AK059596ENTEGEYSGLEHQVVR000000000000000000
AK059596	Os01g0276100	Similar to 3-isopropylmalate dehydrogenase, chloroplast precursor (EC 1.1.1.85) (Beta-IPM dehydrogenase) (IMDH) (3-IPM-DH). (Os01t0276100-01)	40056.6	R-HLQFNNQADR-I	000000000000	317	326	621.801	2	-1.42098	0.0204422	3	Os01g0276100|AK059596HLQFNNQADR000000000000
Os01g0276200	Os01g0276200	Porin, eukaryotic type family protein. (Os01t0276200-00)	36857.2	K-VPTSNYEFGANFMDPK-M	000000000000030000	111	126	916.912	2	0.265274	0.0176002	2	Os01g0276200|Os01g0276200VPTSNYEFGANFMDPK000000000000030000
Os01g0276200	Os01g0276200	Porin, eukaryotic type family protein. (Os01t0276200-00)	36857.2	R-KSGVGFVAR-Y	00000000000	217	225	460.769	2	-1.52455	0.0212157	2	Os01g0276200|Os01g0276200KSGVGFVAR00000000000
AK103465	Os01g0276700	Similar to Pyruvate kinase, cytosolic isozyme (EC 2.7.1.40) (PK). (Os01t0276700-01), Similar to Pyruvate kinase, cytosolic isozyme (EC 2.7.1.40) (PK). (Os01t0276700-02), Similar to Pyruvate kinase. (Os01t0276700-03), Similar to Pyruvate kinase. (Os01t0276700-04)	55792.7	M-AVMEEQQEGAAGVMR-R	00030000000000300	2	16	819.362	2	-5.06052	3.03558e-06	9	Os01g0276700|AK103465AVMEEQQEGAAGVMR00030000000000300
AK103465	Os01g0276700	Similar to Pyruvate kinase, cytosolic isozyme (EC 2.7.1.40) (PK). (Os01t0276700-01), Similar to Pyruvate kinase, cytosolic isozyme (EC 2.7.1.40) (PK). (Os01t0276700-02), Similar to Pyruvate kinase. (Os01t0276700-03), Similar to Pyruvate kinase. (Os01t0276700-04)	55792.7	R-FNFSHGSHEYHQETLDNLR-A	000000000000000000000	50	68	583.52	4	1.30362	0.0350831	9	Os01g0276700|AK103465FNFSHGSHEYHQETLDNLR000000000000000000000
AK103465	Os01g0276700	Similar to Pyruvate kinase, cytosolic isozyme (EC 2.7.1.40) (PK). (Os01t0276700-01), Similar to Pyruvate kinase, cytosolic isozyme (EC 2.7.1.40) (PK). (Os01t0276700-02), Similar to Pyruvate kinase. (Os01t0276700-03), Similar to Pyruvate kinase. (Os01t0276700-04)	55792.7	R-KGSDLVEVR-K	00000000000	216	224	501.783	2	0.254579	0.00817051	9	Os01g0276700|AK103465KGSDLVEVR00000000000
AK103465	Os01g0276700	Similar to Pyruvate kinase, cytosolic isozyme (EC 2.7.1.40) (PK). (Os01t0276700-01), Similar to Pyruvate kinase, cytosolic isozyme (EC 2.7.1.40) (PK). (Os01t0276700-02), Similar to Pyruvate kinase. (Os01t0276700-03), Similar to Pyruvate kinase. (Os01t0276700-04)	55792.7	R-GDLGMEIPIEK-I	0000030000000	264	274	609.309	2	1.29933	0.00419606	9	Os01g0276700|AK103465GDLGMEIPIEK0000030000000
AK103465	Os01g0276700	Similar to Pyruvate kinase, cytosolic isozyme (EC 2.7.1.40) (PK). (Os01t0276700-01), Similar to Pyruvate kinase, cytosolic isozyme (EC 2.7.1.40) (PK). (Os01t0276700-02), Similar to Pyruvate kinase. (Os01t0276700-03), Similar to Pyruvate kinase. (Os01t0276700-04)	55792.7	K-SITASAPIPMSPLESLASSAVR-T	000000000030000000000000	366	387	1101.08	2	4.56768	0.023211	9	Os01g0276700|AK103465SITASAPIPMSPLESLASSAVR000000000030000000000000
AK103465	Os01g0276700	Similar to Pyruvate kinase, cytosolic isozyme (EC 2.7.1.40) (PK). (Os01t0276700-01), Similar to Pyruvate kinase, cytosolic isozyme (EC 2.7.1.40) (PK). (Os01t0276700-02), Similar to Pyruvate kinase. (Os01t0276700-03), Similar to Pyruvate kinase. (Os01t0276700-04)	55792.7	K-AALILVLTR-G	00000000000	394	402	485.327	2	1.56168	0.000329153	9	Os01g0276700|AK103465AALILVLTR00000000000
AK103465	Os01g0276700	Similar to Pyruvate kinase, cytosolic isozyme (EC 2.7.1.40) (PK). (Os01t0276700-01), Similar to Pyruvate kinase, cytosolic isozyme (EC 2.7.1.40) (PK). (Os01t0276700-02), Similar to Pyruvate kinase. (Os01t0276700-03), Similar to Pyruvate kinase. (Os01t0276700-04)	55792.7	K-YRPSMPILSVVVPELK-Q	000003000000000000	413	428	615.354	3	7.03969	0.00592764	9	Os01g0276700|AK103465YRPSMPILSVVVPELK000003000000000000
AK103258	Os01g0279200	Similar to COP9 signalosome complex subunit 2. (Os01t0279200-01), Similar to COP9 signalosome complex subunit 2 (Signalosome subunit 2) (FUSCA protein 12) (FUSCA12). (Os01t0279200-02), Similar to COP9 signalosome complex subunit 2. (Os01t0279200-03)	51737	K-GMVETDPEGALAGFDQVVR-M	003000000000000000000	35	53	1003.98	2	-0.985089	4.54695e-08	2	Os01g0279200|AK103258GMVETDPEGALAGFDQVVR003000000000000000000
AK103258	Os01g0279200	Similar to COP9 signalosome complex subunit 2. (Os01t0279200-01), Similar to COP9 signalosome complex subunit 2 (Signalosome subunit 2) (FUSCA protein 12) (FUSCA12). (Os01t0279200-02), Similar to COP9 signalosome complex subunit 2. (Os01t0279200-03)	51737	K-NIYQTVSNR-V	00000000000	429	437	547.782	2	-1.65546	0.00424081	2	Os01g0279200|AK103258NIYQTVSNR00000000000
AK122127	Os01g0282800	Similar to Tubulin beta-5 chain (Beta-5 tubulin). (Os01t0282800-01), Similar to Tubulin beta-5 chain (Beta-5 tubulin). (Os01t0282800-02)	51105.3	R-AVLMDLEPGTMDSVR-T	00003000000300000	63	77	833.395	2	-0.200742	1.20083e-05	15	Os01g0282800|AK122127AVLMDLEPGTMDSVR00003000000300000
AK122127	Os01g0282800	Similar to Tubulin beta-5 chain (Beta-5 tubulin). (Os01t0282800-01), Similar to Tubulin beta-5 chain (Beta-5 tubulin). (Os01t0282800-02)	51105.3	R-MMLTFSVFPSPK-V	03300000000000	163	174	708.841	2	-10.9735	0.00176679	15	Os01g0282800|AK122127MMLTFSVFPSPK03300000000000
AK122127	Os01g0282800	Similar to Tubulin beta-5 chain (Beta-5 tubulin). (Os01t0282800-01), Similar to Tubulin beta-5 chain (Beta-5 tubulin). (Os01t0282800-02)	51105.3	K-LAVNLIPFPR-L	000000000000	253	262	570.352	2	2.46692	1.28367e-06	15	Os01g0282800|AK122127LAVNLIPFPR000000000000
AK122127	Os01g0282800	Similar to Tubulin beta-5 chain (Beta-5 tubulin). (Os01t0282800-01), Similar to Tubulin beta-5 chain (Beta-5 tubulin). (Os01t0282800-02)	51105.3	R-LHFFMVGFAPLTSR-G	0000030000000000	263	276	819.927	2	0.518311	0.00327548	15	Os01g0282800|AK122127LHFFMVGFAPLTSR0000030000000000
AK122127	Os01g0282800	Similar to Tubulin beta-5 chain (Beta-5 tubulin). (Os01t0282800-01), Similar to Tubulin beta-5 chain (Beta-5 tubulin). (Os01t0282800-02)	51105.3	R-YLTASAMFR-G	00000003000	310	318	538.266	2	0.582264	0.00308439	15	Os01g0282800|AK122127YLTASAMFR00000003000
AK122127	Os01g0282800	Similar to Tubulin beta-5 chain (Beta-5 tubulin). (Os01t0282800-01), Similar to Tubulin beta-5 chain (Beta-5 tubulin). (Os01t0282800-02)	51105.3	K-EVDEQMINVQNK-N	00000030000000	325	336	731.845	2	-0.73207	4.6621e-07	15	Os01g0282800|AK122127EVDEQMINVQNK00000030000000
AK122127	Os01g0282800	Similar to Tubulin beta-5 chain (Beta-5 tubulin). (Os01t0282800-01), Similar to Tubulin beta-5 chain (Beta-5 tubulin). (Os01t0282800-02)	51105.3	K-EVDEQMINVQNK-N	00000000000000	325	336	723.85	2	1.82519	0.0138871	15	Os01g0282800|AK122127EVDEQMINVQNK00000000000000
AK122127	Os01g0282800	Similar to Tubulin beta-5 chain (Beta-5 tubulin). (Os01t0282800-01), Similar to Tubulin beta-5 chain (Beta-5 tubulin). (Os01t0282800-02)	51105.3	K-NSSYFVEWIPNNVK-S	0000000000000000	337	350	848.923	2	2.95024	0.00969616	15	Os01g0282800|AK122127NSSYFVEWIPNNVK0000000000000000
AK122127	Os01g0282800	Similar to Tubulin beta-5 chain (Beta-5 tubulin). (Os01t0282800-01), Similar to Tubulin beta-5 chain (Beta-5 tubulin). (Os01t0282800-02)	51105.3	R-RVSEQFTAMFR-R	0000000003000	380	390	694.344	2	1.44603	0.00354285	15	Os01g0282800|AK122127RVSEQFTAMFR0000000003000
AK122127	Os01g0282800	Similar to Tubulin beta-5 chain (Beta-5 tubulin). (Os01t0282800-01), Similar to Tubulin beta-5 chain (Beta-5 tubulin). (Os01t0282800-02)	51105.3	R-VSEQFTAMFR-R	000000003000	381	390	616.293	2	1.16313	6.64549e-06	15	Os01g0282800|AK122127VSEQFTAMFR000000003000
AK071713	Os01g0283100	Similar to Ferripyochelin-binding protein-like. (Os01t0283100-01), Similar to Ferripyochelin-binding protein-like. (Os01t0283100-02)	28735.5	R-TLMNIFDK-T	0003000000	44	51	499.256	2	1.67712	0.0438036	9	Os01g0283100|AK071713TLMNIFDK0003000000
AK071713	Os01g0283100	Similar to Ferripyochelin-binding protein-like. (Os01t0283100-01), Similar to Ferripyochelin-binding protein-like. (Os01t0283100-02)	28735.5	R-GDANNVQIGSGTNIQDNSLVHVAK-S	00000000000000000000000000	87	110	817.746	3	-0.0769462	7.16881e-06	9	Os01g0283100|AK071713GDANNVQIGSGTNIQDNSLVHVAK00000000000000000000000000
AK071713	Os01g0283100	Similar to Ferripyochelin-binding protein-like. (Os01t0283100-01), Similar to Ferripyochelin-binding protein-like. (Os01t0283100-02)	28735.5	K-HGMVAAGALVR-Q	0003000000000	160	170	549.298	2	0.45611	0.00315259	9	Os01g0283100|AK071713HGMVAAGALVR0003000000000
AK071713	Os01g0283100	Similar to Ferripyochelin-binding protein-like. (Os01t0283100-01), Similar to Ferripyochelin-binding protein-like. (Os01t0283100-02)	28735.5	K-LTDDEITFIK-E	000000000000	192	201	597.817	2	1.67161	0.0343936	9	Os01g0283100|AK071713LTDDEITFIK000000000000
AK071713	Os01g0283100	Similar to Ferripyochelin-binding protein-like. (Os01t0283100-01), Similar to Ferripyochelin-binding protein-like. (Os01t0283100-02)	28735.5	K-ESASNYSTLAK-A	0000000000000	202	212	585.784	2	-1.69395	0.000634056	9	Os01g0283100|AK071713ESASNYSTLAK0000000000000
AK071713	Os01g0283100	Similar to Ferripyochelin-binding protein-like. (Os01t0283100-01), Similar to Ferripyochelin-binding protein-like. (Os01t0283100-02)	28735.5	K-AHAAENAKPVEK-T	00000000000000	213	224	632.834	2	-2.71045	0.0105049	9	Os01g0283100|AK071713AHAAENAKPVEK00000000000000
AK071713	Os01g0283100	Similar to Ferripyochelin-binding protein-like. (Os01t0283100-01), Similar to Ferripyochelin-binding protein-like. (Os01t0283100-02)	28735.5	K-SAHQDEEHDSMIGATR-E	000000000003000000	235	250	600.593	3	0.96077	0.00464741	9	Os01g0283100|AK071713SAHQDEEHDSMIGATR000000000003000000
AK069735	Os01g0290100	Pyridoxal phosphate-dependent transferase, major region, subdomain 1 domain containing protein. (Os01t0290100-01)	52514.5	R-FEGGIEGIR-S	00000000000	340	348	489.252	2	-9.34097	0.0404279	1	Os01g0290100|AK069735FEGGIEGIR00000000000
J065045I15	Os01g0293000	Similar to S-adenosylmethionine synthetase 1 (EC 2.5.1.6) (Methionine adenosyltransferase 1) (AdoMet synthetase 1) (Fragment). (Os01t0293000-01)	43850.9	K-TIFHLNPSGR-F	000000000000	231	240	571.31	2	0.628148	0.000250139	3	Os01g0293000|J065045I15TIFHLNPSGR000000000000
J065045I15	Os01g0293000	Similar to S-adenosylmethionine synthetase 1 (EC 2.5.1.6) (Methionine adenosyltransferase 1) (AdoMet synthetase 1) (Fragment). (Os01t0293000-01)	43850.9	R-FVIGGPHGDAGLTGR-K	00000000000000000	241	255	727.381	2	0.437266	3.0508e-07	3	Os01g0293000|J065045I15FVIGGPHGDAGLTGR00000000000000000
AK070568	Os01g0300200	Similar to ATP-citrate lyase subunit B. (Os01t0300200-01), Similar to ATP-citrate lyase subunit B. (Os01t0300200-02), Similar to ACLB-1 (ATP-citrate lyase B-1). (Os01t0300200-03)	66667.4	R-VVAIIAEGVPESDTK-Q	00000000000000000	106	120	764.417	2	-0.310285	3.8614e-07	4	Os01g0300200|AK070568VVAIIAEGVPESDTK00000000000000000
AK070568	Os01g0300200	Similar to ATP-citrate lyase subunit B. (Os01t0300200-01), Similar to ATP-citrate lyase subunit B. (Os01t0300200-02), Similar to ACLB-1 (ATP-citrate lyase B-1). (Os01t0300200-03)	66667.4	R-FNNIPQVK-M	0000000000	217	224	480.272	2	5.3846	0.0388744	4	Os01g0300200|AK070568FNNIPQVK0000000000
AK070568	Os01g0300200	Similar to ATP-citrate lyase subunit B. (Os01t0300200-01), Similar to ATP-citrate lyase subunit B. (Os01t0300200-02), Similar to ACLB-1 (ATP-citrate lyase B-1). (Os01t0300200-03)	66667.4	K-SEVQFGHAGAK-S	0000000000000	267	277	565.785	2	3.00639	0.0382449	4	Os01g0300200|AK070568SEVQFGHAGAK0000000000000
AK070568	Os01g0300200	Similar to ATP-citrate lyase subunit B. (Os01t0300200-01), Similar to ATP-citrate lyase subunit B. (Os01t0300200-02), Similar to ACLB-1 (ATP-citrate lyase B-1). (Os01t0300200-03)	66667.4	R-FGGAIDDAAR-Y	000000000000	448	457	496.744	2	1.73078	0.000329058	4	Os01g0300200|AK070568FGGAIDDAAR000000000000
AK058273	Os01g0300600	Carbohydrate-binding-like fold domain containing protein. (Os01t0300600-01)	43021.1	K-FTPSAVAIDLNSGESR-E	000000000000000000	108	123	832.421	2	4.08193	0.0060816	3	Os01g0300600|AK058273FTPSAVAIDLNSGESR000000000000000000
AK058273	Os01g0300600	Carbohydrate-binding-like fold domain containing protein. (Os01t0300600-01)	43021.1	R-VAYSAMGSVTLLTGQPK-E	0000003000000000000	132	148	869.957	2	1.16136	0.0349969	3	Os01g0300600|AK058273VAYSAMGSVTLLTGQPK0000003000000000000
AK058273	Os01g0300600	Carbohydrate-binding-like fold domain containing protein. (Os01t0300600-01)	43021.1	R-GYYEEATTDSFGR-F	000000000000000	161	173	748.322	2	1.55539	1.10147e-07	3	Os01g0300600|AK058273GYYEEATTDSFGR000000000000000
AK099426	Os01g0306800	Conserved hypothetical protein. (Os01t0306800-01), Hypothetical conserved gene. (Os01t0306800-02)	51446.8	K-MSDPVIIQR-L	03000000000	405	413	537.781	2	-6.56751	0.0304169	1	Os01g0306800|AK099426MSDPVIIQR03000000000
AK101168	Os01g0315800	UDP-glucuronic acid decarboxylase (EC 4.1.1.35). (Os01t0315800-01), Similar to DTDP-glucose 4-6-dehydratase-like protein (Fragment). (Os01t0315800-02)	46630	R-VLVTGGAGFVGSHLVDR-L	0000000000000000000	115	131	842.465	2	3.28523	1.85323e-06	8	Os01g0315800|AK101168VLVTGGAGFVGSHLVDR0000000000000000000
AK101168	Os01g0315800	UDP-glucuronic acid decarboxylase (EC 4.1.1.35). (Os01t0315800-01), Similar to DTDP-glucose 4-6-dehydratase-like protein (Fragment). (Os01t0315800-02)	46630	K-TNVVGTLNMLGLAK-R	0000000003000000	202	215	723.903	2	-0.145535	9.87078e-05	8	Os01g0315800|AK101168TNVVGTLNMLGLAK0000000003000000
AK101168	Os01g0315800	UDP-glucuronic acid decarboxylase (EC 4.1.1.35). (Os01t0315800-01), Similar to DTDP-glucose 4-6-dehydratase-like protein (Fragment). (Os01t0315800-02)	46630	R-TAETLTMDYHR-G	0000000300000	261	271	677.309	2	0.773974	0.000587469	8	Os01g0315800|AK101168TAETLTMDYHR0000000300000
AK101168	Os01g0315800	UDP-glucuronic acid decarboxylase (EC 4.1.1.35). (Os01t0315800-01), Similar to DTDP-glucose 4-6-dehydratase-like protein (Fragment). (Os01t0315800-02)	46630	R-IFNTYGPR-M	0000000000	282	289	484.254	2	1.79078	0.0245725	8	Os01g0315800|AK101168IFNTYGPR0000000000
AK101168	Os01g0315800	UDP-glucuronic acid decarboxylase (EC 4.1.1.35). (Os01t0315800-01), Similar to DTDP-glucose 4-6-dehydratase-like protein (Fragment). (Os01t0315800-02)	46630	R-VVSNFVAQALR-K	0000000000000	297	307	602.344	2	-3.48636	2.40909e-05	8	Os01g0315800|AK101168VVSNFVAQALR0000000000000
AK101168	Os01g0315800	UDP-glucuronic acid decarboxylase (EC 4.1.1.35). (Os01t0315800-01), Similar to DTDP-glucose 4-6-dehydratase-like protein (Fragment). (Os01t0315800-02)	46630	K-VVQDTIDPNAR-I	0000000000000	361	371	614.32	2	0.543612	1.02787e-05	8	Os01g0315800|AK101168VVQDTIDPNAR0000000000000
Os01g0317500	Os01g0317500	0	10158.2	R-LTAEEFYAR-H	00000000000	17	25	550.275	2	1.63437	6.16344e-05	1	Os01g0317500|Os01g0317500LTAEEFYAR00000000000
AK105905	Os01g0317800	Alpha/beta hydrolase family protein. (Os01t0317800-01)	36263.5	R-LTAEEFYAR-H	00000000000	17	25	550.275	2	1.63437	6.16344e-05	1	Os01g0317800|AK105905LTAEEFYAR00000000000
Os01g0319200	Os01g0319200	Hypothetical conserved gene. (Os01t0319200-00)	57478.1	K-ELTMHGVK-F	0000000000	312	319	457.739	2	-6.36844	0.0320202	1	Os01g0319200|Os01g0319200ELTMHGVK0000000000
AK065231	Os01g0323100	Similar to Pto kinase interactor 1. (Os01t0323100-01)	40676.1	R-NLPIAVPAIPLDEIK-G	00000000000000000	51	65	801.98	2	4.32074	1.15459e-05	7	Os01g0323100|AK065231NLPIAVPAIPLDEIK00000000000000000
AK065231	Os01g0323100	Similar to Pto kinase interactor 1. (Os01t0323100-01)	40676.1	K-NFSSDALIGEGSYAR-V	00000000000000000	70	84	793.876	2	-0.125805	1.71789e-05	7	Os01g0323100|AK065231NFSSDALIGEGSYAR00000000000000000
AK065231	Os01g0323100	Similar to Pto kinase interactor 1. (Os01t0323100-01)	40676.1	R-VLAYEYAPR-G	00000000000	140	148	541.288	2	1.82926	0.00126187	7	Os01g0323100|AK065231VLAYEYAPR00000000000
AK065231	Os01g0323100	Similar to Pto kinase interactor 1. (Os01t0323100-01)	40676.1	K-GAQPGPALSWMQR-V	000000000003000	163	175	707.849	2	0.54736	0.0212432	7	Os01g0323100|AK065231GAQPGPALSWMQR000000000003000
AK065231	Os01g0323100	Similar to Pto kinase interactor 1. (Os01t0323100-01)	40676.1	K-VGDFDVSNQSPDMAAR-L	000000000000030000	217	232	862.883	2	2.11311	0.00237032	7	Os01g0323100|AK065231VGDFDVSNQSPDMAAR000000000000030000
AK065231	Os01g0323100	Similar to Pto kinase interactor 1. (Os01t0323100-01)	40676.1	R-VLGTFGYHAPEYAMTGQLSTK-S	00000000000000300000000	238	258	763.04	3	-0.49866	0.000402995	7	Os01g0323100|AK065231VLGTFGYHAPEYAMTGQLSTK00000000000000300000000
AK065231	Os01g0323100	Similar to Pto kinase interactor 1. (Os01t0323100-01)	40676.1	R-GQQSLVTWATPR-L	00000000000000	285	296	672.354	2	-4.65426	0.000312977	7	Os01g0323100|AK065231GQQSLVTWATPR00000000000000
AK061988	Os01g0328400	Ubiquitin. (Os01t0328400-01)	17941.5	K-TITLEVESSDTIDNVK-A	000000000000000000	12	27	882.45	2	1.10475	0.000100279	8	Os01g0328400|AK061988TITLEVESSDTIDNVK000000000000000000
AK061988	Os01g0328400	Ubiquitin. (Os01t0328400-01)	17941.5	K-IQDKEGIPPDQQR-L	000000000000000	30	42	762.395	2	1.082	0.000353557	8	Os01g0328400|AK061988IQDKEGIPPDQQR000000000000000
AK061988	Os01g0328400	Ubiquitin. (Os01t0328400-01)	17941.5	R-TLADYNIQK-E	00000000000	55	63	533.284	2	3.1509	0.0132602	8	Os01g0328400|AK061988TLADYNIQK00000000000
AK061988	Os01g0328400	Ubiquitin. (Os01t0328400-01)	17941.5	K-ESTLHLVLR-L	00000000000	64	72	534.314	2	0.362399	6.49208e-06	8	Os01g0328400|AK061988ESTLHLVLR00000000000
AK066632	Os01g0328700	FAD-dependent pyridine nucleotide-disulphide oxidoreductase domain containing protein. (Os01t0328700-01)	53107	K-FSNLEVDLPAMMAQK-D	00000000000330000	110	124	863.415	2	2.00307	7.83661e-05	10	Os01g0328700|AK066632FSNLEVDLPAMMAQK00000000000330000
AK066632	Os01g0328700	FAD-dependent pyridine nucleotide-disulphide oxidoreductase domain containing protein. (Os01t0328700-01)	53107	K-LASPSEVSVDLSDGGSTVVK-G	0000000000000000000000	153	172	973.999	2	-0.352818	3.73638e-05	10	Os01g0328700|AK066632LASPSEVSVDLSDGGSTVVK0000000000000000000000
AK066632	Os01g0328700	FAD-dependent pyridine nucleotide-disulphide oxidoreductase domain containing protein. (Os01t0328700-01)	53107	K-GKNIIIATGSDVK-S	000000000000000	173	185	658.381	2	-1.84565	2.26551e-05	10	Os01g0328700|AK066632GKNIIIATGSDVK000000000000000
AK066632	Os01g0328700	FAD-dependent pyridine nucleotide-disulphide oxidoreductase domain containing protein. (Os01t0328700-01)	53107	K-NIIIATGSDVK-S	0000000000000	175	185	565.825	2	0.944723	0.000408031	10	Os01g0328700|AK066632NIIIATGSDVK0000000000000
AK066632	Os01g0328700	FAD-dependent pyridine nucleotide-disulphide oxidoreductase domain containing protein. (Os01t0328700-01)	53107	K-SLPGVTIDEK-K	000000000000	186	195	529.79	2	0.444613	0.0413148	10	Os01g0328700|AK066632SLPGVTIDEK000000000000
AK066632	Os01g0328700	FAD-dependent pyridine nucleotide-disulphide oxidoreductase domain containing protein. (Os01t0328700-01)	53107	K-VVGVDTSGDGVK-L	00000000000000	274	285	566.795	2	-2.00862	0.00367468	10	Os01g0328700|AK066632VVGVDTSGDGVK00000000000000
AK066632	Os01g0328700	FAD-dependent pyridine nucleotide-disulphide oxidoreductase domain containing protein. (Os01t0328700-01)	53107	R-VPYTAGIGLESVGVETDK-A	00000000000000000000	311	328	917.975	2	-0.735596	5.22919e-08	10	Os01g0328700|AK066632VPYTAGIGLESVGVETDK00000000000000000000
AK066632	Os01g0328700	FAD-dependent pyridine nucleotide-disulphide oxidoreductase domain containing protein. (Os01t0328700-01)	53107	R-VPYTAGIGLESVGVETDKAGR-I	00000000000000000000000	311	331	707.038	3	-1.11151	0.00303706	10	Os01g0328700|AK066632VPYTAGIGLESVGVETDKAGR00000000000000000000000
AK066632	Os01g0328700	FAD-dependent pyridine nucleotide-disulphide oxidoreductase domain containing protein. (Os01t0328700-01)	53107	K-AIDDAEGLVK-V	000000000000	426	435	515.775	2	1.58964	0.000416357	10	Os01g0328700|AK066632AIDDAEGLVK000000000000
Os01g0337100	Os01g0337100	Similar to Terpene synthase 11. (Os01t0337100-00)	63898.2	--MPADHMEK-T	0300003000	1	8	495.71	2	11.1029	0.0183321	1	Os01g0337100|Os01g0337100MPADHMEK0300003000
AY333187	Os01g0337500	Similar to H+-pyrophosphatase (Fragment). (Os01t0337500-00)	80416.4	K-AADVGADLVGK-V	0000000000000	260	270	508.277	2	3.89959	2.52751e-06	12	Os01g0337500|AY333187AADVGADLVGK0000000000000
AY333187	Os01g0337500	Similar to H+-pyrophosphatase (Fragment). (Os01t0337500-00)	80416.4	K-AADVGADLVGKVER-N	0000000000000000	260	273	700.382	2	1.55334	1.75793e-07	12	Os01g0337500|AY333187AADVGADLVGKVER0000000000000000
AY333187	Os01g0337500	Similar to H+-pyrophosphatase (Fragment). (Os01t0337500-00)	80416.4	R-NIPEDDPR-N	0000000000	274	281	478.228	2	0.760586	0.0245713	12	Os01g0337500|AY333187NIPEDDPR0000000000
AY333187	Os01g0337500	Similar to H+-pyrophosphatase (Fragment). (Os01t0337500-00)	80416.4	R-TGAATNVIFGLALGYK-S	000000000000000000	451	466	798.444	2	1.16392	7.57386e-05	12	Os01g0337500|AY333187TGAATNVIFGLALGYK000000000000000000
AY333187	Os01g0337500	Similar to H+-pyrophosphatase (Fragment). (Os01t0337500-00)	80416.4	R-TDALDAAGNTTAAIGK-G	000000000000000000	535	550	745.379	2	0.776407	3.2353e-11	12	Os01g0337500|AY333187TDALDAAGNTTAAIGK000000000000000000
AY333187	Os01g0337500	Similar to H+-pyrophosphatase (Fragment). (Os01t0337500-00)	80416.4	K-MVEEVRR-Q	000000000	613	619	459.745	2	0.197503	0.0274784	12	Os01g0337500|AY333187MVEEVRR000000000
AY333187	Os01g0337500	Similar to H+-pyrophosphatase (Fragment). (Os01t0337500-00)	80416.4	K-YIEAGASDHAK-A	0000000000000	705	715	581.279	2	-1.92774	0.0327026	12	Os01g0337500|AY333187YIEAGASDHAK0000000000000
AY333187	Os01g0337500	Similar to H+-pyrophosphatase (Fragment). (Os01t0337500-00)	80416.4	K-AAVIGDTIGDPLK-D	000000000000000	727	739	635.355	2	-2.20707	1.67193e-05	12	Os01g0337500|AY333187AAVIGDTIGDPLK000000000000000
AY333187	Os01g0337500	Similar to H+-pyrophosphatase (Fragment). (Os01t0337500-00)	80416.4	K-DTSGPSLNILIK-L	00000000000000	740	751	629.354	2	-3.08791	1.34099e-05	12	Os01g0337500|AY333187DTSGPSLNILIK00000000000000
AK103351	Os01g0338000	Similar to GTP-binding protein SAR1A. (Os01t0338000-01), Similar to GTP-binding protein SAR1A. (Os01t0338000-02)	22041.5	K-ILFLGLDNAGK-T	0000000000000	23	33	580.838	2	2.02201	0.000154104	4	Os01g0338000|AK103351ILFLGLDNAGK0000000000000
AK103351	Os01g0338000	Similar to GTP-binding protein SAR1A. (Os01t0338000-01), Similar to GTP-binding protein SAR1A. (Os01t0338000-02)	22041.5	R-LVQHQPTQHPTSEELSIGK-I	000000000000000000000	45	63	710.367	3	-5.57418	0.00414103	4	Os01g0338000|AK103351LVQHQPTQHPTSEELSIGK000000000000000000000
AK103351	Os01g0338000	Similar to GTP-binding protein SAR1A. (Os01t0338000-01), Similar to GTP-binding protein SAR1A. (Os01t0338000-02)	22041.5	K-AFDLGGHQIAR-R	0000000000000	68	78	592.813	2	1.67222	0.000187731	4	Os01g0338000|AK103351AFDLGGHQIAR0000000000000
AK103351	Os01g0338000	Similar to GTP-binding protein SAR1A. (Os01t0338000-01), Similar to GTP-binding protein SAR1A. (Os01t0338000-02)	22041.5	K-VDAVVYLVDAYDKER-F	00000000000000000	88	102	877.952	2	0.961932	0.0159062	4	Os01g0338000|AK103351VDAVVYLVDAYDKER00000000000000000
AK066111	Os01g0339900	Thioredoxin domain 2 containing protein. (Os01t0339900-01)	41212.2	R-SAEALAEFVNTEGGTNVK-L	00000000000000000000	130	147	918.952	2	0.131527	0.000142152	3	Os01g0339900|AK066111SAEALAEFVNTEGGTNVK00000000000000000000
AK066111	Os01g0339900	Thioredoxin domain 2 containing protein. (Os01t0339900-01)	41212.2	K-YGVSGYPTLK-F	000000000000	223	232	542.788	2	0.982906	0.00174411	3	Os01g0339900|AK066111YGVSGYPTLK000000000000
AK066111	Os01g0339900	Thioredoxin domain 2 containing protein. (Os01t0339900-01)	41212.2	R-IASLDALAK-E	00000000000	278	286	451.272	2	1.33546	0.0206782	3	Os01g0339900|AK066111IASLDALAK00000000000
AK100444	Os01g0348600	Similar to MFP2 (Fatty acid multifunctional protein) (AtMFP2). (Os01t0348600-01), Similar to glyoxysomal fatty acid beta-oxidation multifunctional protein MFP-a. (Os01t0348600-02), Similar to glyoxysomal fatty acid beta-oxidation multifunctional protein MFP-a. (Os01t0348600-03)	80122.1	K-VPGATDLGLMPR-K	00000000003000	301	312	621.828	2	-1.20899	3.69934e-05	2	Os01g0348600|AK100444VPGATDLGLMPR00000000003000
AK100444	Os01g0348600	Similar to MFP2 (Fatty acid multifunctional protein) (AtMFP2). (Os01t0348600-01), Similar to glyoxysomal fatty acid beta-oxidation multifunctional protein MFP-a. (Os01t0348600-02), Similar to glyoxysomal fatty acid beta-oxidation multifunctional protein MFP-a. (Os01t0348600-03)	80122.1	R-SMAGVTPDTELMK-L	003000000000300	611	623	706.325	2	-1.74034	0.0288594	2	Os01g0348600|AK100444SMAGVTPDTELMK003000000000300
AK120842	Os01g0348700	Similar to 60S ribosomal protein L23a (L25). (Os01t0348700-01)	17039.7	R-NKLDQYQILK-Y	000000000000	65	74	631.859	2	0.746602	0.000393563	2	Os01g0348700|AK120842NKLDQYQILK000000000000
AK120842	Os01g0348700	Similar to 60S ribosomal protein L23a (L25). (Os01t0348700-01)	17039.7	K-LTPDYDALDVANK-I	000000000000000	136	148	717.856	2	-4.74638	0.0067845	2	Os01g0348700|AK120842LTPDYDALDVANK000000000000000
AK061826	Os01g0358400	Similar to 40S ribosomal protein S4. (Os01t0358400-01)	29931.3	K-FDVGNVVMVTGGR-N	000000003000000	175	187	683.843	2	0.175951	0.0156354	2	Os01g0358400|AK061826FDVGNVVMVTGGR000000003000000
AK061826	Os01g0358400	Similar to 40S ribosomal protein S4. (Os01t0358400-01)	29931.3	R-LGNVFTIGK-G	00000000000	222	230	474.78	2	2.46538	0.00794087	2	Os01g0358400|AK061826LGNVFTIGK00000000000
AK069339	Os01g0360600	Dephospho-CoA kinase family protein. (Os01t0360600-01)	25868.9	R-LVGLTGGIASGK-S	00000000000000	3	14	536.822	2	1.42517	0.00115661	3	Os01g0360600|AK069339LVGLTGGIASGK00000000000000
AK069339	Os01g0360600	Dephospho-CoA kinase family protein. (Os01t0360600-01)	25868.9	K-IVEAFGNDVLLENGEIDR-A	00000000000000000000	49	66	1002.01	2	1.76019	1.07073e-05	3	Os01g0360600|AK069339IVEAFGNDVLLENGEIDR00000000000000000000
AK069339	Os01g0360600	Dephospho-CoA kinase family protein. (Os01t0360600-01)	25868.9	R-LGQIVFSDPEKR-Q	00000000000000	69	80	463.59	3	1.37467	0.00490717	3	Os01g0360600|AK069339LGQIVFSDPEKR00000000000000
AK120610	Os01g0363900	Similar to HASTY. (Os01t0363900-01)	134052	R-SAAFAYLESVK-T	0000000000000	28	38	593.308	2	-4.78197	0.00885733	5	Os01g0363900|AK120610SAAFAYLESVK0000000000000
AK120610	Os01g0363900	Similar to HASTY. (Os01t0363900-01)	134052	R-VSSDTPAAGNSASTGGGSTER-E	00000000000000000000000	386	406	954.93	2	-0.3949	2.17933e-08	5	Os01g0363900|AK120610VSSDTPAAGNSASTGGGSTER00000000000000000000000
AK120610	Os01g0363900	Similar to HASTY. (Os01t0363900-01)	134052	R-INIVFGDANEATK-S	000000000000000	486	498	696.369	2	9.77879	0.0101348	5	Os01g0363900|AK120610INIVFGDANEATK000000000000000
AK120610	Os01g0363900	Similar to HASTY. (Os01t0363900-01)	134052	K-SMTVAEQTSLLGETNK-L	003000000000000000	793	808	862.923	2	0.630259	0.000250638	5	Os01g0363900|AK120610SMTVAEQTSLLGETNK003000000000000000
AK120610	Os01g0363900	Similar to HASTY. (Os01t0363900-01)	134052	K-GQVASADGLLDVQR-E	0000000000000000	812	825	714.877	2	1.91791	0.000340146	5	Os01g0363900|AK120610GQVASADGLLDVQR0000000000000000
AK063804	Os01g0367400	Conserved hypothetical protein. (Os01t0367400-01), Similar to cDNA clone:001-121-G01, full insert sequence. (Os01t0367400-02)	31534.9	R-TDDYPGDLR-V	00000000000	163	171	526.24	2	2.61831	0.00445316	1	Os01g0367400|AK063804TDDYPGDLR00000000000
AK105265	Os01g0367900	Similar to Possible global transcription activator SNF2L1 (SWI/SNF related matrix associated actin dependent regulator of chromatin subfamily A member 1). (Os01t0367900-01)	128338	K-FVFLLSTR-A	0000000000	602	609	491.79	2	0.781253	0.0267882	1	Os01g0367900|AK105265FVFLLSTR0000000000
AK058900	Os01g0371200	Similar to Glutathione-S-transferase 19E50. (Os01t0371200-01)	25049.7	K-KVLEVYEAR-L	00000000000	145	153	553.812	2	-2.4161	0.0011045	4	Os01g0371200|AK058900KVLEVYEAR00000000000
AK058900	Os01g0371200	Similar to Glutathione-S-transferase 19E50. (Os01t0371200-01)	25049.7	K-VLEVYEAR-L	0000000000	146	153	489.767	2	0.606185	0.00554385	4	Os01g0371200|AK058900VLEVYEAR0000000000
AK101893	Os01g0372700	Similar to Asparaginyl-tRNA synthetase, cytoplasmic 1 (EC 6.1.1.22) (Asparagine-- tRNA ligase 1) (AsnRS 1). (Os01t0372700-01)	63046.4	K-ENPAPSESDIEAAR-V	0000000000000000	216	229	743.346	2	2.06689	1.57709e-05	3	Os01g0372700|AK101893ENPAPSESDIEAAR0000000000000000
AK101893	Os01g0372700	Similar to Asparaginyl-tRNA synthetase, cytoplasmic 1 (EC 6.1.1.22) (Asparagine-- tRNA ligase 1) (AsnRS 1). (Os01t0372700-01)	63046.4	K-QEITAAVAELNK-A	00000000000000	250	261	643.851	2	0.173681	0.0124872	3	Os01g0372700|AK101893QEITAAVAELNK00000000000000
AK101893	Os01g0372700	Similar to Asparaginyl-tRNA synthetase, cytoplasmic 1 (EC 6.1.1.22) (Asparagine-- tRNA ligase 1) (AsnRS 1). (Os01t0372700-01)	63046.4	R-EDMEFMVK-N	0000003000	375	382	522.717	2	-10.7986	0.0371638	3	Os01g0372700|AK101893EDMEFMVK0000003000
AK101893	Os01g0372700	Similar to Asparaginyl-tRNA synthetase, cytoplasmic 1 (EC 6.1.1.22) (Asparagine-- tRNA ligase 1) (AsnRS 1). (Os01t0372700-01)	63046.4	R-MILFATGLENIR-D	03000000000000	534	545	697.381	2	2.62604	0.00243138	3	Os01g0372700|AK101893MILFATGLENIR03000000000000
J075176C11	Os01g0374000	Similar to Glutathione S-transferase I (EC 2.5.1.18) (GST-I) (GST-29) (GST class- phi). (Os01t0374000-01)	24439.5	K-VVEENLEK-L	0000000000	131	138	480.255	2	-2.59006	0.00191158	1	Os01g0374000|J075176C11VVEENLEK0000000000
AK071525	Os01g0376700	Similar to Sucrose-phosphatase (EC 3.1.3.24). (Os01t0376700-01)	47647.1	K-IIYSGGQDLDILPQGAGK-G	00000000000000000000	159	176	922.991	2	-0.521646	2.02952e-05	2	Os01g0376700|AK071525IIYSGGQDLDILPQGAGK00000000000000000000
AK071525	Os01g0376700	Similar to Sucrose-phosphatase (EC 3.1.3.24). (Os01t0376700-01)	47647.1	K-GQALAYLLK-K	00000000000	177	185	488.794	2	-1.12188	4.08578e-05	2	Os01g0376700|AK071525GQALAYLLK00000000000
AK059266	Os01g0377700	Similar to NPL4 family protein. (Os01t0377700-01), NPL4 domain containing protein. (Os01t0377700-02)	45076.4	R-ITVPDPAAATVGDLQR-L	000000000000000000	14	29	812.444	2	6.51237	0.0374247	5	Os01g0377700|AK059266ITVPDPAAATVGDLQR000000000000000000
AK059266	Os01g0377700	Similar to NPL4 family protein. (Os01t0377700-01), NPL4 domain containing protein. (Os01t0377700-02)	45076.4	R-VDAIAHGLGMR-R	0000000000300	199	209	578.3	2	-1.03227	0.000756409	5	Os01g0377700|AK059266VDAIAHGLGMR0000000000300
AK059266	Os01g0377700	Similar to NPL4 family protein. (Os01t0377700-01), NPL4 domain containing protein. (Os01t0377700-02)	45076.4	R-VGLVFTQAVGR-K	0000000000000	211	221	573.836	2	2.3589	0.0117797	5	Os01g0377700|AK059266VGLVFTQAVGR0000000000000
AK059266	Os01g0377700	Similar to NPL4 family protein. (Os01t0377700-01), NPL4 domain containing protein. (Os01t0377700-02)	45076.4	K-TSDTGEYTMSNR-E	00000000030000	223	234	689.282	2	-1.18356	0.000466007	5	Os01g0377700|AK059266TSDTGEYTMSNR00000000030000
AK069894	Os01g0496900	Similar to predicted protein. (Os01t0496900-01)	55247.7	R-NHGISDLSR-V	00000000000	288	296	499.754	2	-0.945559	0.0445872	1	Os01g0496900|AK069894NHGISDLSR00000000000
AK067715	Os01g0501800	Similar to Photosystem II oxygen-evolving complex protein 1 (Fragment). (Os01t0501800-01)	35123.9	R-VPFLFTIK-N	0000000000	210	217	482.798	2	2.11035	0.012556	4	Os01g0501800|AK067715VPFLFTIK0000000000
AK067715	Os01g0501800	Similar to Photosystem II oxygen-evolving complex protein 1 (Fragment). (Os01t0501800-01)	35123.9	R-GGSTGYDNAVALPAGGR-G	0000000000000000000	249	265	781.881	2	-0.690392	0.0351168	4	Os01g0501800|AK067715GGSTGYDNAVALPAGGR0000000000000000000
AK067715	Os01g0501800	Similar to Photosystem II oxygen-evolving complex protein 1 (Fragment). (Os01t0501800-01)	35123.9	K-NASSSTGNITLSVTK-S	00000000000000000	278	292	740.387	2	1.74199	4.95738e-06	4	Os01g0501800|AK067715NASSSTGNITLSVTK00000000000000000
AK067715	Os01g0501800	Similar to Photosystem II oxygen-evolving complex protein 1 (Fragment). (Os01t0501800-01)	35123.9	K-IQGVWYAQLE--	000000000000	324	333	603.813	2	3.07942	0.00934209	4	Os01g0501800|AK067715IQGVWYAQLE000000000000
AK099867	Os01g0507300	Protein of unknown function DUF92, transmembrane family protein. (Os01t0507300-01)	30812.5	R-TAVGAALAAVIAAR-A	0000000000000000	12	25	627.882	2	2.35653	3.22314e-07	1	Os01g0507300|AK099867TAVGAALAAVIAAR0000000000000000
AK069825	Os01g0511300	Proteasome component region PCI domain containing protein. (Os01t0511300-01)	43895	K-MQIAAINLEK-G	030000000000	119	128	573.816	2	4.5788	5.48831e-05	2	Os01g0511300|AK069825MQIAAINLEK030000000000
AK069825	Os01g0511300	Proteasome component region PCI domain containing protein. (Os01t0511300-01)	43895	R-TIPLSVIAER-T	000000000000	298	307	549.83	2	1.38698	0.0474113	2	Os01g0511300|AK069825TIPLSVIAER000000000000
AK106208	Os01g0531500	Dienelactone hydrolase domain containing protein. (Os01t0531500-01), Similar to protein usf. (Os01t0531500-02)	30533.4	R-DDTTFDAYVVGK-E	00000000000000	54	65	665.812	2	0.705588	0.00251213	4	Os01g0531500|AK106208DDTTFDAYVVGK00000000000000
AK106208	Os01g0531500	Dienelactone hydrolase domain containing protein. (Os01t0531500-01), Similar to protein usf. (Os01t0531500-02)	30533.4	K-AQAPIQAHFGELDSFVGFADVTAAK-S	000000000000000000000000000	190	214	864.102	3	-0.647316	0.002255	4	Os01g0531500|AK106208AQAPIQAHFGELDSFVGFADVTAAK000000000000000000000000000
AK106208	Os01g0531500	Dienelactone hydrolase domain containing protein. (Os01t0531500-01), Similar to protein usf. (Os01t0531500-02)	30533.4	R-FSTWMGR-F	000003000	270	276	450.704	2	-2.5824	0.0401418	4	Os01g0531500|AK106208FSTWMGR000003000
AK067431	Os01g0549700	Similar to RNA helicase (Fragment). (Os01t0549700-01), Similar to cDNA clone:J033114G10, full insert sequence. (Os01t0549700-02), Similar to predicted protein. (Os01t0549700-03)	49333	R-ILVATDLVGR-G	000000000000	346	355	528.825	2	1.257	6.88266e-07	4	Os01g0549700|AK067431ILVATDLVGR000000000000
AK067431	Os01g0549700	Similar to RNA helicase (Fragment). (Os01t0549700-01), Similar to cDNA clone:J033114G10, full insert sequence. (Os01t0549700-02), Similar to predicted protein. (Os01t0549700-03)	49333	R-VNIVINYDMPDSADSYLHR-V	000000000300000000000	362	380	746.69	3	2.0708	0.0125857	4	Os01g0549700|AK067431VNIVINYDMPDSADSYLHR000000000300000000000
AK122050	Os01g0550000	DEAD-like helicase, N-terminal domain containing protein. (Os01t0550000-01), Similar to spliceosome RNA helicase BAT1. (Os01t0550000-02)	49246	R-ILVATDLVGR-G	000000000000	346	355	528.825	2	1.257	6.88266e-07	4	Os01g0550000|AK122050ILVATDLVGR000000000000
AK122050	Os01g0550000	DEAD-like helicase, N-terminal domain containing protein. (Os01t0550000-01), Similar to spliceosome RNA helicase BAT1. (Os01t0550000-02)	49246	R-VNIVINYDMPDSADSYLHR-V	000000000300000000000	362	380	746.69	3	2.0708	0.0125857	4	Os01g0550000|AK122050VNIVINYDMPDSADSYLHR000000000300000000000
AK066233	Os01g0550100	Similar to Ubiquitin-specific protease 6. (Os01t0550100-01), Similar to Ubiquitin-specific protease 6. (Os01t0550100-02)	53629	K-SALLSYSDNVR-G	0000000000000	130	140	612.815	2	0.597892	0.000513713	1	Os01g0550100|AK066233SALLSYSDNVR0000000000000
S66160	Os01g0558600	Ras-related protein RIC1. (Os01t0558600-01)	22746.3	--MNPEYDYLFK-L	030000000000	1	10	668.306	2	8.69697	0.0288065	5	Os01g0558600|S66160MNPEYDYLFK030000000000
S66160	Os01g0558600	Ras-related protein RIC1. (Os01t0558600-01)	22746.3	K-LQIWDTAGQER-F	0000000000000	59	69	658.834	2	0.389487	2.24942e-05	5	Os01g0558600|S66160LQIWDTAGQER0000000000000
S66160	Os01g0558600	Ras-related protein RIC1. (Os01t0558600-01)	22746.3	K-ALADEIGIPFLETSAK-D	000000000000000000	138	153	837.951	2	-0.0148994	0.00976022	5	Os01g0558600|S66160ALADEIGIPFLETSAK000000000000000000
S66160	Os01g0558600	Ras-related protein RIC1. (Os01t0558600-01)	22746.3	K-AFMTMAGEIK-N	000303000000	161	170	565.764	2	-0.976583	0.000469418	5	Os01g0558600|S66160AFMTMAGEIK000303000000
AK061456	Os01g0559000	Protein of unknown function DUF1000 family protein. (Os01t0559000-01), Similar to Thioredoxin family Trp26. (Os01t0559000-02)	22854.1	K-SISVVGGADGTSPSR-M	00000000000000000	81	95	695.351	2	-0.819979	3.97096e-05	1	Os01g0559000|AK061456SISVVGGADGTSPSR00000000000000000
AK105974	Os01g0560000	Similar to Auxin amidohydrolase. (Os01t0560000-01), Similar to cDNA clone:001-205-F05, full insert sequence. (Os01t0560000-02)	47318.2	K-EAEFAGWMVGLR-R	00000000300000	42	53	691.33	2	-3.68606	2.49336e-05	4	Os01g0560000|AK105974EAEFAGWMVGLR00000000300000
AK105974	Os01g0560000	Similar to Auxin amidohydrolase. (Os01t0560000-01), Similar to cDNA clone:001-205-F05, full insert sequence. (Os01t0560000-02)	47318.2	K-GTVVLVFQPAEEGGGGAK-K	00000000000000000000	160	177	858.453	2	1.48058	0.0019017	4	Os01g0560000|AK105974GTVVLVFQPAEEGGGGAK00000000000000000000
AK105974	Os01g0560000	Similar to Auxin amidohydrolase. (Os01t0560000-01), Similar to cDNA clone:001-205-F05, full insert sequence. (Os01t0560000-02)	47318.2	R-EADPLDSQVVTVGK-F	0000000000000000	257	270	729.379	2	1.74976	0.0199832	4	Os01g0560000|AK105974EADPLDSQVVTVGK0000000000000000
AK105974	Os01g0560000	Similar to Auxin amidohydrolase. (Os01t0560000-01), Similar to cDNA clone:001-205-F05, full insert sequence. (Os01t0560000-02)	47318.2	R-YLLEHQPPTTGK-A	00000000000000	424	435	692.369	2	2.40995	0.0265039	4	Os01g0560000|AK105974YLLEHQPPTTGK00000000000000
AK072509	Os01g0574400	Similar to Cell division protein ftsH (EC 3.4.24.-). (Os01t0574400-01), Similar to Cell division protease ftsH homolog 4, mitochondrial. (Os01t0574400-02)	76880	K-GVLLVGPPGTGK-T	00000000000000	258	269	547.833	2	0.948363	0.0326523	1	Os01g0574400|AK072509GVLLVGPPGTGK00000000000000
AK120948	Os01g0574500	ATPase, AAA-type, core domain containing protein. (Os01t0574500-01), Similar to Cell division protease ftsH homolog 5, mitochondrial. (Os01t0574500-02)	77741.1	K-GVLLVGPPGTGK-T	00000000000000	265	276	547.833	2	0.948363	0.0326523	1	Os01g0574500|AK120948GVLLVGPPGTGK00000000000000
AK070726	Os01g0575000	Root hair defective 3 GTP-binding family protein. (Os01t0575000-01), Root hair defective 3 GTP-binding family protein. (Os01t0575000-02), Similar to Root hair defective 3 GTP-binding protein. (Os01t0575000-03)	91060.5	K-GSEDAAIQQVK-W	0000000000000	413	423	573.293	2	-0.570258	0.00298317	2	Os01g0575000|AK070726GSEDAAIQQVK0000000000000
AK070726	Os01g0575000	Root hair defective 3 GTP-binding family protein. (Os01t0575000-01), Root hair defective 3 GTP-binding family protein. (Os01t0575000-02), Similar to Root hair defective 3 GTP-binding protein. (Os01t0575000-03)	91060.5	K-LLSTMAAIR-L	00000300000	581	589	496.285	2	2.28336	9.86052e-05	2	Os01g0575000|AK070726LLSTMAAIR00000300000
AK111319	Os01g0579800	Conserved hypothetical protein. (Os01t0579800-01)	15891.6	M-ADAGKPDPASPPEAPSAK-K	10000000000000000000	2	19	874.428	2	-1.06176	0.00146403	1	Os01g0579800|AK111319ADAGKPDPASPPEAPSAK10000000000000000000
AK069484	Os01g0582400	Similar to Multidomain cyclophilin type peptidyl-prolyl cis-trans isomerase. (Os01t0582400-01)	57026.9	R-FLKGEAPDEQLTK-E	000000000000000	239	251	738.396	2	7.72852	0.00826897	3	Os01g0582400|AK069484FLKGEAPDEQLTK000000000000000
AK067605	Os01g0587000	Similar to Vacuolar ATP synthase subunit d (EC 3.6.3.14) (V-ATPase d subunit) (Vacuolar proton pump d subunit) (V-ATPase 41 KDa accessory protein) (DVA41). (Os01t0587000-01)	41539.3	R-AVNITINSIGTELTR-D	00000000000000000	220	234	801.442	2	-5.04081	2.73036e-09	6	Os01g0587000|AK067605AVNITINSIGTELTR00000000000000000
AK067605	Os01g0587000	Similar to Vacuolar ATP synthase subunit d (EC 3.6.3.14) (V-ATPase d subunit) (Vacuolar proton pump d subunit) (V-ATPase 41 KDa accessory protein) (DVA41). (Os01t0587000-01)	41539.3	R-GVMEKYPPYQAIFAK-I	00030000000000000	266	280	586.636	3	0.907011	0.000696391	6	Os01g0587000|AK067605GVMEKYPPYQAIFAK00030000000000000
AK067605	Os01g0587000	Similar to Vacuolar ATP synthase subunit d (EC 3.6.3.14) (V-ATPase d subunit) (Vacuolar proton pump d subunit) (V-ATPase 41 KDa accessory protein) (DVA41). (Os01t0587000-01)	41539.3	K-ISYGESQMLDK-A	0000000030000	281	291	643.799	2	-2.24176	6.08356e-06	6	Os01g0587000|AK067605ISYGESQMLDK0000000030000
AK067605	Os01g0587000	Similar to Vacuolar ATP synthase subunit d (EC 3.6.3.14) (V-ATPase d subunit) (Vacuolar proton pump d subunit) (V-ATPase 41 KDa accessory protein) (DVA41). (Os01t0587000-01)	41539.3	K-AFYEEEVR-R	0000000000	292	299	521.746	2	-0.0306072	0.0358225	6	Os01g0587000|AK067605AFYEEEVR0000000000
AK070745	Os01g0588200	Voltage-dependent anion channel. (Os01t0588200-01)	29944.4	M-APGLYTDIGK-K	000000000000	2	11	517.78	2	1.89384	3.5249e-06	15	Os01g0588200|AK070745APGLYTDIGK000000000000
AK070745	Os01g0588200	Voltage-dependent anion channel. (Os01t0588200-01)	29944.4	M-APGLYTDIGKK-T	0000000000000	2	12	581.827	2	-0.507005	0.0279003	15	Os01g0588200|AK070745APGLYTDIGKK0000000000000
AK070745	Os01g0588200	Voltage-dependent anion channel. (Os01t0588200-01)	29944.4	R-KNESVFGELQTQLK-N	0000000000000000	46	59	810.934	2	0.775918	0.000148748	15	Os01g0588200|AK070745KNESVFGELQTQLK0000000000000000
AK070745	Os01g0588200	Voltage-dependent anion channel. (Os01t0588200-01)	29944.4	K-NESVFGELQTQLK-N	000000000000000	47	59	746.885	2	-0.470655	7.40168e-06	15	Os01g0588200|AK070745NESVFGELQTQLK000000000000000
AK070745	Os01g0588200	Voltage-dependent anion channel. (Os01t0588200-01)	29944.4	K-ANSESDLLTTVTVDEFGTPGLK-S	000000000000000000000000	69	90	1147.58	2	1.85228	9.26366e-06	15	Os01g0588200|AK070745ANSESDLLTTVTVDEFGTPGLK000000000000000000000000
AK070745	Os01g0588200	Voltage-dependent anion channel. (Os01t0588200-01)	29944.4	K-SILSLVVPDQR-S	0000000000000	91	101	613.86	2	2.72823	1.54383e-05	15	Os01g0588200|AK070745SILSLVVPDQR0000000000000
AK070745	Os01g0588200	Voltage-dependent anion channel. (Os01t0588200-01)	29944.4	R-NESTLIFGSQHSLDPHTTVK-A	0000000000000000000000	208	227	737.706	3	-0.446271	0.00153185	15	Os01g0588200|AK070745NESTLIFGSQHSLDPHTTVK0000000000000000000000
AK070745	Os01g0588200	Voltage-dependent anion channel. (Os01t0588200-01)	29944.4	K-SLITISGEVDTK-A	00000000000000	248	259	631.846	2	1.40949	0.000422143	15	Os01g0588200|AK070745SLITISGEVDTK00000000000000
AK070745	Os01g0588200	Voltage-dependent anion channel. (Os01t0588200-01)	29944.4	K-VGLSLVLKH--	00000000000	267	275	483.312	2	1.71271	3.15522e-05	15	Os01g0588200|AK070745VGLSLVLKH00000000000
AK121456	Os01g0589100	Conserved hypothetical protein. (Os01t0589100-01)	8632.44	R-QVEDIKETSEK-H	2000000000000	41	51	644.815	2	-2.49836	0.0048553	2	Os01g0589100|AK121456QVEDIKETSEK2000000000000
AK121456	Os01g0589100	Conserved hypothetical protein. (Os01t0589100-01)	8632.44	R-QVEDIKETSEKHYESLNQR-V	200000000000000000000	41	59	772.708	3	-0.161127	0.000469172	2	Os01g0589100|AK121456QVEDIKETSEKHYESLNQR200000000000000000000
AK121212	Os01g0600000	Similar to Copia-like retroelement pol polyprotein. (Os01t0600000-01)	14213.4	R-SKAAQASELVSK-H	00000000000000	10	21	609.836	2	-3.4395	0.0115779	3	Os01g0600000|AK121212SKAAQASELVSK00000000000000
AK121212	Os01g0600000	Similar to Copia-like retroelement pol polyprotein. (Os01t0600000-01)	14213.4	K-AAQASELVSK-H	000000000000	12	21	502.273	2	-3.53481	0.000235613	3	Os01g0600000|AK121212AAQASELVSK000000000000
AK121212	Os01g0600000	Similar to Copia-like retroelement pol polyprotein. (Os01t0600000-01)	14213.4	R-GFTITGYKV--	00000000000	114	122	493.271	2	0.0627176	0.000175073	3	Os01g0600000|AK121212GFTITGYKV00000000000
AK121563	Os01g0600900	Chlorophyll a-b binding protein 2, chloroplast precursor (LHCII type I CAB-2) (LHCP). (Os01t0600900-01), Chlorophyll a-b binding protein 2, chloroplast precursor (LHCII type I CAB-2) (LHCP). (Os01t0600900-02), Similar to Chlorophyll a-b binding protein 2, chloroplastic. (Os01t0600900-03)	27606	K-SAAKPKPAASGSPWYGADR-V	000000000000000000000	32	50	639.657	3	-3.11812	0.000214425	5	Os01g0600900|AK121563SAAKPKPAASGSPWYGADR000000000000000000000
AK121563	Os01g0600900	Chlorophyll a-b binding protein 2, chloroplast precursor (LHCII type I CAB-2) (LHCP). (Os01t0600900-01), Chlorophyll a-b binding protein 2, chloroplast precursor (LHCII type I CAB-2) (LHCP). (Os01t0600900-02), Similar to Chlorophyll a-b binding protein 2, chloroplastic. (Os01t0600900-03)	27606	K-NRELEVIHSR-W	000000000000	90	99	626.842	2	0.253245	0.00084201	5	Os01g0600900|AK121563NRELEVIHSR000000000000
AK121563	Os01g0600900	Chlorophyll a-b binding protein 2, chloroplast precursor (LHCII type I CAB-2) (LHCP). (Os01t0600900-01), Chlorophyll a-b binding protein 2, chloroplast precursor (LHCII type I CAB-2) (LHCP). (Os01t0600900-02), Similar to Chlorophyll a-b binding protein 2, chloroplastic. (Os01t0600900-03)	27606	R-ELEVIHSR-W	0000000000	92	99	491.768	2	-2.89685	8.44738e-05	5	Os01g0600900|AK121563ELEVIHSR0000000000
AK121563	Os01g0600900	Chlorophyll a-b binding protein 2, chloroplast precursor (LHCII type I CAB-2) (LHCP). (Os01t0600900-01), Chlorophyll a-b binding protein 2, chloroplast precursor (LHCII type I CAB-2) (LHCP). (Os01t0600900-02), Similar to Chlorophyll a-b binding protein 2, chloroplastic. (Os01t0600900-03)	27606	K-FGEAVWFK-A	0000000000	121	128	492.252	2	-1.54989	0.000196302	5	Os01g0600900|AK121563FGEAVWFK0000000000
Os01g0605400	Os01g0605400	0	77010.9	R-LPATTTTTAGNVQR-R	0000000000000000	30	43	715.883	2	-1.34609	1.28134e-05	1	Os01g0605400|Os01g0605400LPATTTTTAGNVQR0000000000000000
Os01g0606100	Os01g0606100	0	50056.1	R-GFLLVGQPSTGR-L	00000000000000	177	188	616.342	2	-1.57204	0.0386469	2	Os01g0606100|Os01g0606100GFLLVGQPSTGR00000000000000
Os01g0606100	Os01g0606100	0	50056.1	R-VYALVAAADAEK-A	00000000000000	269	280	610.828	2	-2.05365	0.00542133	2	Os01g0606100|Os01g0606100VYALVAAADAEK00000000000000
AK073115	Os01g0610500	Yip1 domain containing protein. (Os01t0610500-01), Similar to Yip1 domain family member 1. (Os01t0610500-02)	31861.2	K-ASGSVPAATGPDPPTIK-F	0000000000000000000	15	31	783.411	2	-1.57059	0.0275636	1	Os01g0610500|AK073115ASGSVPAATGPDPPTIK0000000000000000000
AK072500	Os01g0611000	Similar to Unidentified precursor. (Os01t0611000-01), Hypothetical conserved gene. (Os01t0611000-02)	43016	K-ESALVQEVR-T	00000000000	289	297	515.78	2	0.766271	0.00724981	1	Os01g0611000|AK072500ESALVQEVR00000000000
AB015288	Os01g0611100	Similar to GTP-binding nuclear protein Ran-2. (Os01t0611100-01)	25412.8	K-LVIVGDGGTGK-T	0000000000000	16	26	508.296	2	5.5998	4.34068e-06	3	Os01g0611100|AB015288LVIVGDGGTGK0000000000000
AB015288	Os01g0611100	Similar to GTP-binding nuclear protein Ran-2. (Os01t0611100-01)	25412.8	K-NLQYYEVSAK-S	000000000000	146	155	607.807	2	1.41094	0.0159466	3	Os01g0611100|AB015288NLQYYEVSAK000000000000
AB015288	Os01g0611100	Similar to GTP-binding nuclear protein Ran-2. (Os01t0611100-01)	25412.8	K-SNYNFEKPFLYLAR-K	0000000000000000	156	169	587.971	3	1.39054	0.00216042	3	Os01g0611100|AB015288SNYNFEKPFLYLAR0000000000000000
AK071340	Os01g0612200	Cytochrome c oxidase, subunit Vb family protein. (Os01t0612200-01)	18249	K-RFDMDPPVGPFGTK-E	0000300000000000	86	99	527.258	3	0.952803	0.000775419	9	Os01g0612200|AK071340RFDMDPPVGPFGTK0000300000000000
AK071340	Os01g0612200	Cytochrome c oxidase, subunit Vb family protein. (Os01t0612200-01)	18249	R-FDMDPPVGPFGTK-E	000300000000000	87	99	712.333	2	1.90722	2.15909e-05	9	Os01g0612200|AK071340FDMDPPVGPFGTK000300000000000
AK071340	Os01g0612200	Cytochrome c oxidase, subunit Vb family protein. (Os01t0612200-01)	18249	K-EAPAVIESYYNK-R	00000000000000	100	111	692.343	2	-0.104565	5.59991e-05	9	Os01g0612200|AK071340EAPAVIESYYNK00000000000000
AK071340	Os01g0612200	Cytochrome c oxidase, subunit Vb family protein. (Os01t0612200-01)	18249	K-EAPAVIESYYNKR-I	000000000000000	100	112	770.394	2	0.83614	9.05802e-06	9	Os01g0612200|AK071340EAPAVIESYYNKR000000000000000
AK071340	Os01g0612200	Cytochrome c oxidase, subunit Vb family protein. (Os01t0612200-01)	18249	K-VIGDGGDPDGHDDDDEHHH--	000000000000000000000	151	169	680.264	3	0.67374	4.88755e-07	9	Os01g0612200|AK071340VIGDGGDPDGHDDDDEHHH000000000000000000000
AK120636	Os01g0614500	Nucleotide-binding, alpha-beta plait domain containing protein. (Os01t0614500-01)	44313	R-GLGWETNSDSLR-A	00000000000000	82	93	667.82	2	-0.215302	0.000887597	4	Os01g0614500|AK120636GLGWETNSDSLR00000000000000
AK120636	Os01g0614500	Nucleotide-binding, alpha-beta plait domain containing protein. (Os01t0614500-01)	44313	R-HADSAVLALK-E	000000000000	126	135	512.793	2	1.06461	0.00166927	4	Os01g0614500|AK120636HADSAVLALK000000000000
AK120636	Os01g0614500	Nucleotide-binding, alpha-beta plait domain containing protein. (Os01t0614500-01)	44313	R-MTVTQLAAAGAAGGASGGAAGAGGAPAADVSLR-K	03000000000000000000000000000000000	145	177	924.462	3	-1.37012	0.00246097	4	Os01g0614500|AK120636MTVTQLAAAGAAGGASGGAAGAGGAPAADVSLR03000000000000000000000000000000000
AK120636	Os01g0614500	Nucleotide-binding, alpha-beta plait domain containing protein. (Os01t0614500-01)	44313	K-TPEGAQASLVDSVK-V	0000000000000000	227	240	701.366	2	1.37107	7.36851e-05	4	Os01g0614500|AK120636TPEGAQASLVDSVK0000000000000000
AF192467	Os01g0624500	Similar to Sgt1. (Os01t0624500-01)	41054.6	M-ATAAASDLESK-A	1000000000000	2	12	553.273	2	1.67965	0.000367723	2	Os01g0624500|AF192467ATAAASDLESK1000000000000
AK122071	Os01g0626300	Similar to Mitochondrial import receptor subunit TOM7-1 (Translocase of outer membrane 7 kDa subunit 1). (Os01t0626300-01)	8696.75	R-KGSPAADEEQSTAAAAVR-F	00000000000000000000	18	35	586.957	3	-2.69177	0.0120753	2	Os01g0626300|AK122071KGSPAADEEQSTAAAAVR00000000000000000000
AK122071	Os01g0626300	Similar to Mitochondrial import receptor subunit TOM7-1 (Translocase of outer membrane 7 kDa subunit 1). (Os01t0626300-01)	8696.75	K-GSPAADEEQSTAAAAVR-F	0000000000000000000	19	35	815.886	2	-0.995845	2.145e-07	2	Os01g0626300|AK122071GSPAADEEQSTAAAAVR0000000000000000000
AK073640	Os01g0639100	Similar to Eukaryotic initiation factor 4A-3 (eIF4A-3) (eIF-4A-3). (Os01t0639100-01)	45995.8	R-GIYAYGFEKPSAIQQR-A	000000000000000000	45	60	914.472	2	-0.60897	3.03685e-06	8	Os01g0639100|AK073640GIYAYGFEKPSAIQQR000000000000000000
AK073640	Os01g0639100	Similar to Eukaryotic initiation factor 4A-3 (eIF4A-3) (eIF-4A-3). (Os01t0639100-01)	45995.8	R-AVLPIISGR-D	00000000000	61	69	463.296	2	1.25995	0.0035238	8	Os01g0639100|AK073640AVLPIISGR00000000000
AK073640	Os01g0639100	Similar to Eukaryotic initiation factor 4A-3 (eIF4A-3) (eIF-4A-3). (Os01t0639100-01)	45995.8	R-DVIAQAQSGTGK-T	00000000000000	70	81	587.807	2	0.321833	1.78019e-07	8	Os01g0639100|AK073640DVIAQAQSGTGK00000000000000
AK073640	Os01g0639100	Similar to Eukaryotic initiation factor 4A-3 (eIF4A-3) (eIF-4A-3). (Os01t0639100-01)	45995.8	R-EVQALILSPTR-E	0000000000000	99	109	613.86	2	1.84592	0.0329306	8	Os01g0639100|AK073640EVQALILSPTR0000000000000
AK073640	Os01g0639100	Similar to Eukaryotic initiation factor 4A-3 (eIF4A-3) (eIF-4A-3). (Os01t0639100-01)	45995.8	R-GFKDQIYDVYR-Y	0000000000000	189	199	702.351	2	-0.186249	0.000284569	8	Os01g0639100|AK073640GFKDQIYDVYR0000000000000
AK073640	Os01g0639100	Similar to Eukaryotic initiation factor 4A-3 (eIF4A-3) (eIF-4A-3). (Os01t0639100-01)	45995.8	K-RDELTLEGIK-Q	000000000000	236	245	587.329	2	2.62775	6.59391e-05	8	Os01g0639100|AK073640RDELTLEGIK000000000000
AK073640	Os01g0639100	Similar to Eukaryotic initiation factor 4A-3 (eIF4A-3) (eIF-4A-3). (Os01t0639100-01)	45995.8	R-DELTLEGIK-Q	00000000000	237	245	509.278	2	1.85876	0.000145247	8	Os01g0639100|AK073640DELTLEGIK00000000000
Os01g0641200	Os01g0641200	0	17282.3	R-TLADYNIQK-E	00000000000	55	63	533.284	2	3.1509	0.0132602	2	Os01g0641200|Os01g0641200TLADYNIQK00000000000
Os01g0641200	Os01g0641200	0	17282.3	K-ESTLHLVLR-L	00000000000	64	72	534.314	2	0.362399	6.49208e-06	2	Os01g0641200|Os01g0641200ESTLHLVLR00000000000
AK069337	Os01g0645200	Hypothetical conserved gene. (Os01t0645200-01), Bile acid:sodium symporter domain containing protein. (Os01t0645200-02), Bile acid:sodium symporter domain containing protein. (Os01t0645200-03)	44961.8	R-GLPANDKDDFKE--	00000000000000	408	419	674.819	2	-4.92581	0.0046756	1	Os01g0645200|AK069337GLPANDKDDFKE00000000000000
AK069624	Os01g0647100	ADP/ATP carrier protein family protein. (Os01t0647100-01), ADP/ATP carrier protein family protein. (Os01t0647100-02)	69115.1	K-GSSAEIIPFLK-T	0000000000000	152	162	581.329	2	-0.288493	0.029816	1	Os01g0647100|AK069624GSSAEIIPFLK0000000000000
AK071699	Os01g0649100	Malate dehydrogenase. (Os01t0649100-01), Malate dehydrogenase. (Os01t0649100-02)	35722.8	K-VAILGAAGGIGQPLSLLMK-L	000000000000000000300	30	48	913.034	2	0.0722067	8.4675e-08	5	Os01g0649100|AK071699VAILGAAGGIGQPLSLLMK000000000000000000300
AK071699	Os01g0649100	Malate dehydrogenase. (Os01t0649100-01), Malate dehydrogenase. (Os01t0649100-02)	35722.8	R-DDLFNINAGIVK-N	00000000000000	114	125	659.857	2	5.07819	0.0257802	5	Os01g0649100|AK071699DDLFNINAGIVK00000000000000
AK071699	Os01g0649100	Malate dehydrogenase. (Os01t0649100-01), Malate dehydrogenase. (Os01t0649100-02)	35722.8	K-KLFGVTTLDVVR-A	00000000000000	168	179	674.403	2	-0.442693	5.39699e-06	5	Os01g0649100|AK071699KLFGVTTLDVVR00000000000000
AK071699	Os01g0649100	Malate dehydrogenase. (Os01t0649100-01), Malate dehydrogenase. (Os01t0649100-02)	35722.8	K-LFGVTTLDVVR-A	0000000000000	169	179	610.357	2	1.29056	0.00266874	5	Os01g0649100|AK071699LFGVTTLDVVR0000000000000
AK071699	Os01g0649100	Malate dehydrogenase. (Os01t0649100-01), Malate dehydrogenase. (Os01t0649100-02)	35722.8	K-RTQDGGTEVVEAK-A	000000000000000	233	245	695.351	2	-1.32618	0.00134435	5	Os01g0649100|AK071699RTQDGGTEVVEAK000000000000000
AK061752	Os01g0654500	Similar to NADP-isocitrate dehydrogenase. (Os01t0654500-01)	46439.7	K-VANPIVEMDGDEMTR-I	00000000300003000	8	22	854.879	2	-0.944634	3.18124e-05	26	Os01g0654500|AK061752VANPIVEMDGDEMTR00000000300003000
AK061752	Os01g0654500	Similar to NADP-isocitrate dehydrogenase. (Os01t0654500-01)	46439.7	K-VANPIVEMDGDEMTR-I	00000000300000000	8	22	846.882	2	0.449351	0.0170906	26	Os01g0654500|AK061752VANPIVEMDGDEMTR00000000300000000
AK061752	Os01g0654500	Similar to NADP-isocitrate dehydrogenase. (Os01t0654500-01)	46439.7	K-YYDLGVLHR-D	00000000000	43	51	568.299	2	0.495339	1.76592e-05	26	Os01g0654500|AK061752YYDLGVLHR00000000000
AK061752	Os01g0654500	Similar to NADP-isocitrate dehydrogenase. (Os01t0654500-01)	46439.7	R-DATDDKVTVEAAEATLK-Y	0000000000000000000	52	68	888.947	2	0.208999	4.79144e-08	26	Os01g0654500|AK061752DATDDKVTVEAAEATLK0000000000000000000
AK061752	Os01g0654500	Similar to NADP-isocitrate dehydrogenase. (Os01t0654500-01)	46439.7	K-VTVEAAEATLK-Y	0000000000000	58	68	566.317	2	0.830212	5.73129e-05	26	Os01g0654500|AK061752VTVEAAEATLK0000000000000
AK061752	Os01g0654500	Similar to NADP-isocitrate dehydrogenase. (Os01t0654500-01)	46439.7	R-NIINGTVFR-E	00000000000	103	111	517.293	2	0.350182	0.0159059	26	Os01g0654500|AK061752NIINGTVFR00000000000
AK061752	Os01g0654500	Similar to NADP-isocitrate dehydrogenase. (Os01t0654500-01)	46439.7	R-HAFGDQYR-A	0000000000	135	142	497.229	2	-2.24592	0.0121442	26	Os01g0654500|AK061752HAFGDQYR0000000000
AK061752	Os01g0654500	Similar to NADP-isocitrate dehydrogenase. (Os01t0654500-01)	46439.7	R-AFAEASMTTAYEK-K	000000030000000	191	203	718.323	2	-1.37558	1.07602e-05	26	Os01g0654500|AK061752AFAEASMTTAYEK000000030000000
AK061752	Os01g0654500	Similar to NADP-isocitrate dehydrogenase. (Os01t0654500-01)	46439.7	R-AFAEASMTTAYEK-K	000000000000000	191	203	710.326	2	-0.59044	7.98421e-05	26	Os01g0654500|AK061752AFAEASMTTAYEK000000000000000
AK061752	Os01g0654500	Similar to NADP-isocitrate dehydrogenase. (Os01t0654500-01)	46439.7	R-AFAEASMTTAYEKK-W	0000000300000000	191	204	782.37	2	-2.65134	6.72673e-06	26	Os01g0654500|AK061752AFAEASMTTAYEKK0000000300000000
AK061752	Os01g0654500	Similar to NADP-isocitrate dehydrogenase. (Os01t0654500-01)	46439.7	R-FKDIFQEVYEAGWK-S	0000000000000000	223	236	587.295	3	1.21933	0.0190678	26	Os01g0654500|AK061752FKDIFQEVYEAGWK0000000000000000
AK061752	Os01g0654500	Similar to NADP-isocitrate dehydrogenase. (Os01t0654500-01)	46439.7	K-SKFEAAGIWYEHR-L	000000000000000	237	249	531.932	3	0.524136	0.00121064	26	Os01g0654500|AK061752SKFEAAGIWYEHR000000000000000
AK061752	Os01g0654500	Similar to NADP-isocitrate dehydrogenase. (Os01t0654500-01)	46439.7	K-FEAAGIWYEHR-L	0000000000000	239	249	689.83	2	-0.429189	6.74298e-05	26	Os01g0654500|AK061752FEAAGIWYEHR0000000000000
AK061752	Os01g0654500	Similar to NADP-isocitrate dehydrogenase. (Os01t0654500-01)	46439.7	R-LIDDMVAYALK-S	0000030000000	250	260	634.335	2	1.42758	0.000796824	26	Os01g0654500|AK061752LIDDMVAYALK0000030000000
AK061752	Os01g0654500	Similar to NADP-isocitrate dehydrogenase. (Os01t0654500-01)	46439.7	K-TIEAEAAHGTVTR-H	000000000000000	302	314	678.349	2	-1.18789	9.72056e-08	26	Os01g0654500|AK061752TIEAEAAHGTVTR000000000000000
AK061752	Os01g0654500	Similar to NADP-isocitrate dehydrogenase. (Os01t0654500-01)	46439.7	K-GGETSTNSIASIFAWTR-G	0000000000000000000	322	338	899.442	2	-0.0533067	6.07849e-06	26	Os01g0654500|AK061752GGETSTNSIASIFAWTR0000000000000000000
AK061752	Os01g0654500	Similar to NADP-isocitrate dehydrogenase. (Os01t0654500-01)	46439.7	K-DLALLIHGSSNVTR-S	0000000000000000	375	388	748.416	2	1.27965	1.67457e-08	26	Os01g0654500|AK061752DLALLIHGSSNVTR0000000000000000
AK120660	Os01g0655500	Protein kinase, core domain containing protein. (Os01t0655500-01), Similar to protein kinase domain containing protein. (Os01t0655500-02)	73028.4	R-ISCVDALR-H	0000000000	375	382	474.256	2	8.08287	0.0322429	1	Os01g0655500|AK120660ISCVDALR0000000000
AK067776	Os01g0655800	Similar to Acyl-CoA synthetase (EC 6.2.1.3). (Os01t0655800-01)	67311.4	K-YYQGTIDNMYR-S	0000000003000	583	593	720.318	2	1.39327	0.0242862	1	Os01g0655800|AK067776YYQGTIDNMYR0000000003000
AK071200	Os01g0659200	Similar to Vacuolar ATP synthase subunit E (EC 3.6.3.14) (V-ATPase E subunit) (Vacuolar proton pump E subunit). (Os01t0659200-01)	26826.1	--MNDADVAK-Q	1300000000	1	8	461.203	2	0.430539	0.0297035	14	Os01g0659200|AK071200MNDADVAK1300000000
AK071200	Os01g0659200	Similar to Vacuolar ATP synthase subunit E (EC 3.6.3.14) (V-ATPase E subunit) (Vacuolar proton pump E subunit). (Os01t0659200-01)	26826.1	K-IRQEYER-K	000000000	51	57	497.26	2	1.44701	0.0101357	14	Os01g0659200|AK071200IRQEYER000000000
AK071200	Os01g0659200	Similar to Vacuolar ATP synthase subunit E (EC 3.6.3.14) (V-ATPase E subunit) (Vacuolar proton pump E subunit). (Os01t0659200-01)	26826.1	R-KKIEYSMQLNASR-I	000000030000000	66	78	528.611	3	-1.29212	0.0142945	14	Os01g0659200|AK071200KKIEYSMQLNASR000000030000000
AK071200	Os01g0659200	Similar to Vacuolar ATP synthase subunit E (EC 3.6.3.14) (V-ATPase E subunit) (Vacuolar proton pump E subunit). (Os01t0659200-01)	26826.1	K-KIEYSMQLNASR-I	00000030000000	67	78	728.367	2	0.0884319	5.8596e-09	14	Os01g0659200|AK071200KIEYSMQLNASR00000030000000
AK071200	Os01g0659200	Similar to Vacuolar ATP synthase subunit E (EC 3.6.3.14) (V-ATPase E subunit) (Vacuolar proton pump E subunit). (Os01t0659200-01)	26826.1	K-IEYSMQLNASR-I	0000030000000	68	78	664.318	2	-1.56014	4.5539e-05	14	Os01g0659200|AK071200IEYSMQLNASR0000030000000
AK071200	Os01g0659200	Similar to Vacuolar ATP synthase subunit E (EC 3.6.3.14) (V-ATPase E subunit) (Vacuolar proton pump E subunit). (Os01t0659200-01)	26826.1	R-IKVLQAQDDLVNSMK-E	00000000000000300	79	93	573.31	3	0.410342	0.0155041	14	Os01g0659200|AK071200IKVLQAQDDLVNSMK00000000000000300
AK071200	Os01g0659200	Similar to Vacuolar ATP synthase subunit E (EC 3.6.3.14) (V-ATPase E subunit) (Vacuolar proton pump E subunit). (Os01t0659200-01)	26826.1	K-VLQAQDDLVNSMK-E	000000000000300	81	93	738.872	2	0.823782	0.00582188	14	Os01g0659200|AK071200VLQAQDDLVNSMK000000000000300
AK071200	Os01g0659200	Similar to Vacuolar ATP synthase subunit E (EC 3.6.3.14) (V-ATPase E subunit) (Vacuolar proton pump E subunit). (Os01t0659200-01)	26826.1	K-VLQAQDDLVNSMKEDATK-Q	00000000000030000000	81	98	1011	2	0.709977	0.000102908	14	Os01g0659200|AK071200VLQAQDDLVNSMKEDATK00000000000030000000
AK071200	Os01g0659200	Similar to Vacuolar ATP synthase subunit E (EC 3.6.3.14) (V-ATPase E subunit) (Vacuolar proton pump E subunit). (Os01t0659200-01)	26826.1	K-VLQAQDDLVNSMKEDATK-Q	00000000000000000000	81	98	669.002	3	0.974612	0.00669007	14	Os01g0659200|AK071200VLQAQDDLVNSMKEDATK00000000000000000000
AK071200	Os01g0659200	Similar to Vacuolar ATP synthase subunit E (EC 3.6.3.14) (V-ATPase E subunit) (Vacuolar proton pump E subunit). (Os01t0659200-01)	26826.1	K-ELVVQGLLR-L	00000000000	116	124	513.818	2	-1.12077	0.00211196	14	Os01g0659200|AK071200ELVVQGLLR00000000000
AK071200	Os01g0659200	Similar to Vacuolar ATP synthase subunit E (EC 3.6.3.14) (V-ATPase E subunit) (Vacuolar proton pump E subunit). (Os01t0659200-01)	26826.1	K-IVCENTLDAR-L	000000000000	199	208	602.802	2	-2.00643	8.20676e-06	14	Os01g0659200|AK071200IVCENTLDAR000000000000
AK071200	Os01g0659200	Similar to Vacuolar ATP synthase subunit E (EC 3.6.3.14) (V-ATPase E subunit) (Vacuolar proton pump E subunit). (Os01t0659200-01)	26826.1	R-KLLFGQVTA--	00000000000	222	230	488.795	2	0.787051	0.00681195	14	Os01g0659200|AK071200KLLFGQVTA00000000000
AK060072	Os01g0663500	Transcriptional coactivator/pterin dehydratase family protein. (Os01t0663500-01)	21487.1	K-INNLNLEGLLSK-K	00000000000000	173	184	664.381	2	-2.45195	0.013388	1	Os01g0663500|AK060072INNLNLEGLLSK00000000000000
AK111561	Os01g0667600	Similar to GTP-binding protein. (Os01t0667600-01)	24571.4	K-VVLIGDSGVGK-S	0000000000000	22	32	522.31	2	2.43447	0.000203901	3	Os01g0667600|AK111561VVLIGDSGVGK0000000000000
AK111561	Os01g0667600	Similar to GTP-binding protein. (Os01t0667600-01)	24571.4	K-AQIWDTAGQER-Y	0000000000000	70	80	637.81	2	0.082183	0.00547705	3	Os01g0667600|AK111561AQIWDTAGQER0000000000000
AK111561	Os01g0667600	Similar to GTP-binding protein. (Os01t0667600-01)	24571.4	R-AITSAYYR-G	0000000000	83	90	472.746	2	1.52505	0.00786806	3	Os01g0667600|AK111561AITSAYYR0000000000
J065043C18	Os01g0667800	Similar to U2 snRNP auxiliary factor, small subunit. (Os01t0667800-01)	24254.5	M-AEHLASIFGTEK-D	10000000000000	2	13	672.843	2	-0.739036	0.000941972	1	Os01g0667800|J065043C18AEHLASIFGTEK10000000000000
AK122067	Os01g0673600	Similar to Ubiquitin-conjugating enzyme E2. (Os01t0673600-01)	17220	R-LLSEPAPGISASPSEENMR-Y	000000000000000000300	17	35	1000.98	2	0.410183	0.000650626	1	Os01g0673600|AK122067LLSEPAPGISASPSEENMR000000000000000000300
AK058509	Os01g0675100	Similar to peroxiredoxin. (Os01t0675100-01)	17351.1	K-GVDDILLVSVNDPFVMK-A	0000000000000000300	70	86	938.99	2	0.437767	0.0153792	4	Os01g0675100|AK058509GVDDILLVSVNDPFVMK0000000000000000300
AK058509	Os01g0675100	Similar to peroxiredoxin. (Os01t0675100-01)	17351.1	K-FLADGLGTYTK-A	0000000000000	100	110	593.314	2	5.25472	0.0128683	4	Os01g0675100|AK058509FLADGLGTYTK0000000000000
AK058509	Os01g0675100	Similar to peroxiredoxin. (Os01t0675100-01)	17351.1	R-RFALLADNLK-V	000000000000	129	138	580.843	2	0.0498409	0.0484813	4	Os01g0675100|AK058509RFALLADNLK000000000000
AK058509	Os01g0675100	Similar to peroxiredoxin. (Os01t0675100-01)	17351.1	R-FALLADNLK-V	00000000000	130	138	502.792	2	-0.653037	0.000497412	4	Os01g0675100|AK058509FALLADNLK00000000000
AB100696	Os01g0678500	Similar to Two-pore calcium channel. (Os01t0678500-01), Similar to Two-pore calcium channel. (Os01t0678500-02)	87794.1	R-RSDALAYGNR-Y	000000000000	53	62	561.786	2	-0.134152	0.044825	1	Os01g0678500|AB100696RSDALAYGNR000000000000
AK062530	Os01g0679600	Similar to THAP domain-containing protein 4. (Os01t0679600-01), Region of unknown function DUF1794 domain containing protein. (Os01t0679600-02)	17591.1	K-TVTLQSELVGNASK-V	0000000000000000	111	124	723.894	2	0.924263	6.10916e-06	1	Os01g0679600|AK062530TVTLQSELVGNASK0000000000000000
AK119702	Os01g0679700	Similar to 60S ribosomal protein L37a. (Os01t0679700-01), Similar to 60S ribosomal protein L37a. (Os01t0679700-02), Similar to 60S ribosomal protein L37a. (Os01t0679700-03)	10520.5	K-AGGAYTMNTASAVTVR-S	000000030000000000	65	80	793.384	2	-1.87502	1.35386e-06	1	Os01g0679700|AK119702AGGAYTMNTASAVTVR000000030000000000
AK069379	Os01g0680900	Similar to Dopamine beta-monooxygenase. (Os01t0680900-01), Cytochrome b561/ferric reductase transmembrane domain containing protein. (Os01t0680900-02)	36826.3	K-TPSQVVADEGFLQSK-D	00000000000000000	117	131	803.412	2	3.5162	0.00137901	1	Os01g0680900|AK069379TPSQVVADEGFLQSK00000000000000000
AK066286	Os01g0681200	Similar to Acyl-CoA synthetase (EC 6.2.1.3). (Os01t0681200-01), Similar to Acyl-CoA synthetase (EC 6.2.1.3). (Os01t0681200-02)	74664.9	R-EAAEEDGGAPSAGPAYR-C	0000000000000000000	17	33	824.364	2	-1.74527	0.00231774	1	Os01g0681200|AK066286EAAEEDGGAPSAGPAYR0000000000000000000
AB008845	Os01g0681900	Non-protein coding transcript. (Os01t0681900-01)	239302	R-VGLLVESAEPR-E	0000000000000	766	776	585.331	2	1.10516	0.00580159	3	Os01g0681900|AB008845VGLLVESAEPR0000000000000
AB008845	Os01g0681900	Non-protein coding transcript. (Os01t0681900-01)	239302	R-IEGATFEMLAR-D	0000000030000	878	888	627.314	2	1.65202	0.00246242	3	Os01g0681900|AB008845IEGATFEMLAR0000000030000
AB008845	Os01g0681900	Non-protein coding transcript. (Os01t0681900-01)	239302	R-VFIETPIQNTNR-A	00000000000000	1377	1388	716.382	2	-2.27352	0.0222263	3	Os01g0681900|AB008845VFIETPIQNTNR00000000000000
AK064953	Os01g0685800	Similar to ATP synthase beta chain, mitochondrial precursor (EC 3.6.3.14). (Os01t0685800-01), Similar to ATP synthase subunit beta, mitochondrial. (Os01t0685800-02)	59639.1	R-LVLEVAQHLGENMVR-T	00000000000003000	121	135	862.462	2	0.979767	3.68421e-07	55	Os01g0685800|AK064953LVLEVAQHLGENMVR00000000000003000
AK064953	Os01g0685800	Similar to ATP synthase beta chain, mitochondrial precursor (EC 3.6.3.14). (Os01t0685800-01), Similar to ATP synthase subunit beta, mitochondrial. (Os01t0685800-02)	59639.1	R-LVLEVAQHLGENMVR-T	00000000000000000	121	135	569.978	3	-0.872759	0.048919	55	Os01g0685800|AK064953LVLEVAQHLGENMVR00000000000000000
AK064953	Os01g0685800	Similar to ATP synthase beta chain, mitochondrial precursor (EC 3.6.3.14). (Os01t0685800-01), Similar to ATP synthase subunit beta, mitochondrial. (Os01t0685800-02)	59639.1	R-TIAMDGTEGLVR-G	00003000000000	136	147	639.822	2	1.00885	4.34483e-06	55	Os01g0685800|AK064953TIAMDGTEGLVR00003000000000
AK064953	Os01g0685800	Similar to ATP synthase beta chain, mitochondrial precursor (EC 3.6.3.14). (Os01t0685800-01), Similar to ATP synthase subunit beta, mitochondrial. (Os01t0685800-02)	59639.1	R-TIAMDGTEGLVR-G	00000000000000	136	147	631.825	2	0.973401	0.000180467	55	Os01g0685800|AK064953TIAMDGTEGLVR00000000000000
AK064953	Os01g0685800	Similar to ATP synthase beta chain, mitochondrial precursor (EC 3.6.3.14). (Os01t0685800-01), Similar to ATP synthase subunit beta, mitochondrial. (Os01t0685800-02)	59639.1	R-VLNTGSPITVPVGR-A	0000000000000000	151	164	705.41	2	0.760881	2.58657e-07	55	Os01g0685800|AK064953VLNTGSPITVPVGR0000000000000000
AK064953	Os01g0685800	Similar to ATP synthase beta chain, mitochondrial precursor (EC 3.6.3.14). (Os01t0685800-01), Similar to ATP synthase subunit beta, mitochondrial. (Os01t0685800-02)	59639.1	R-IMNVIGEPIDEK-G	00000000000000	170	181	679.354	2	-1.24125	1.33404e-06	55	Os01g0685800|AK064953IMNVIGEPIDEK00000000000000
AK064953	Os01g0685800	Similar to ATP synthase beta chain, mitochondrial precursor (EC 3.6.3.14). (Os01t0685800-01), Similar to ATP synthase subunit beta, mitochondrial. (Os01t0685800-02)	59639.1	R-IMNVIGEPIDEK-G	00300000000000	170	181	687.353	2	0.342843	1.44839e-05	55	Os01g0685800|AK064953IMNVIGEPIDEK00300000000000
AK064953	Os01g0685800	Similar to ATP synthase beta chain, mitochondrial precursor (EC 3.6.3.14). (Os01t0685800-01), Similar to ATP synthase subunit beta, mitochondrial. (Os01t0685800-02)	59639.1	R-IMNVIGEPIDEKGDITTNHFLPIHR-E	003000000000000000000000000	170	194	959.164	3	0.388472	0.00734761	55	Os01g0685800|AK064953IMNVIGEPIDEKGDITTNHFLPIHR003000000000000000000000000
AK064953	Os01g0685800	Similar to ATP synthase beta chain, mitochondrial precursor (EC 3.6.3.14). (Os01t0685800-01), Similar to ATP synthase subunit beta, mitochondrial. (Os01t0685800-02)	59639.1	K-GDITTNHFLPIHR-E	000000000000000	182	194	507.604	3	1.12463	0.00513251	55	Os01g0685800|AK064953GDITTNHFLPIHR000000000000000
AK064953	Os01g0685800	Similar to ATP synthase beta chain, mitochondrial precursor (EC 3.6.3.14). (Os01t0685800-01), Similar to ATP synthase subunit beta, mitochondrial. (Os01t0685800-02)	59639.1	R-EAPAFVEQATEQQILVTGIK-V	0000000000000000000000	195	214	1086.58	2	0.645004	4.51887e-08	55	Os01g0685800|AK064953EAPAFVEQATEQQILVTGIK0000000000000000000000
AK064953	Os01g0685800	Similar to ATP synthase beta chain, mitochondrial precursor (EC 3.6.3.14). (Os01t0685800-01), Similar to ATP synthase subunit beta, mitochondrial. (Os01t0685800-02)	59639.1	K-VVDLLAPYQR-G	000000000000	215	224	587.335	2	0.0152972	9.10221e-07	55	Os01g0685800|AK064953VVDLLAPYQR000000000000
AK064953	Os01g0685800	Similar to ATP synthase beta chain, mitochondrial precursor (EC 3.6.3.14). (Os01t0685800-01), Similar to ATP synthase subunit beta, mitochondrial. (Os01t0685800-02)	59639.1	K-IGLFGGAGVGK-T	0000000000000	228	238	488.286	2	1.97836	7.55387e-05	55	Os01g0685800|AK064953IGLFGGAGVGK0000000000000
AK064953	Os01g0685800	Similar to ATP synthase beta chain, mitochondrial precursor (EC 3.6.3.14). (Os01t0685800-01), Similar to ATP synthase subunit beta, mitochondrial. (Os01t0685800-02)	59639.1	K-TVLIMELINNVAK-A	000003000000000	239	251	737.424	2	4.89077	1.30178e-06	55	Os01g0685800|AK064953TVLIMELINNVAK000003000000000
AK064953	Os01g0685800	Similar to ATP synthase beta chain, mitochondrial precursor (EC 3.6.3.14). (Os01t0685800-01), Similar to ATP synthase subunit beta, mitochondrial. (Os01t0685800-02)	59639.1	K-TVLIMELINNVAK-A	000000000000000	239	251	729.425	2	2.62995	0.00109544	55	Os01g0685800|AK064953TVLIMELINNVAK000000000000000
AK064953	Os01g0685800	Similar to ATP synthase beta chain, mitochondrial precursor (EC 3.6.3.14). (Os01t0685800-01), Similar to ATP synthase subunit beta, mitochondrial. (Os01t0685800-02)	59639.1	K-AHGGFSVFAGVGER-T	0000000000000000	252	265	695.846	2	-1.0777	2.52028e-08	55	Os01g0685800|AK064953AHGGFSVFAGVGER0000000000000000
AK064953	Os01g0685800	Similar to ATP synthase beta chain, mitochondrial precursor (EC 3.6.3.14). (Os01t0685800-01), Similar to ATP synthase subunit beta, mitochondrial. (Os01t0685800-02)	59639.1	R-TREGNDLYREMIESGVIK-L	00000000000300000000	266	283	532.268	4	-2.30509	0.00356828	55	Os01g0685800|AK064953TREGNDLYREMIESGVIK00000000000300000000
AK064953	Os01g0685800	Similar to ATP synthase beta chain, mitochondrial precursor (EC 3.6.3.14). (Os01t0685800-01), Similar to ATP synthase subunit beta, mitochondrial. (Os01t0685800-02)	59639.1	R-EMIESGVIK-L	00300000000	275	283	511.264	2	-1.64073	0.00247622	55	Os01g0685800|AK064953EMIESGVIK00300000000
AK064953	Os01g0685800	Similar to ATP synthase beta chain, mitochondrial precursor (EC 3.6.3.14). (Os01t0685800-01), Similar to ATP synthase subunit beta, mitochondrial. (Os01t0685800-02)	59639.1	K-CALVYGQMNEPPGAR-A	00000000300000000	293	307	846.895	2	-0.0542515	1.37211e-07	55	Os01g0685800|AK064953CALVYGQMNEPPGAR00000000300000000
AK064953	Os01g0685800	Similar to ATP synthase beta chain, mitochondrial precursor (EC 3.6.3.14). (Os01t0685800-01), Similar to ATP synthase subunit beta, mitochondrial. (Os01t0685800-02)	59639.1	R-VGLTGLTVAEHFR-D	000000000000000	310	322	700.389	2	0.673656	3.97962e-06	55	Os01g0685800|AK064953VGLTGLTVAEHFR000000000000000
AK064953	Os01g0685800	Similar to ATP synthase beta chain, mitochondrial precursor (EC 3.6.3.14). (Os01t0685800-01), Similar to ATP synthase subunit beta, mitochondrial. (Os01t0685800-02)	59639.1	R-FTQANSEVSALLGR-I	0000000000000000	339	352	746.892	2	0.337612	5.87831e-09	55	Os01g0685800|AK064953FTQANSEVSALLGR0000000000000000
AK064953	Os01g0685800	Similar to ATP synthase beta chain, mitochondrial precursor (EC 3.6.3.14). (Os01t0685800-01), Similar to ATP synthase subunit beta, mitochondrial. (Os01t0685800-02)	59639.1	R-IPSAVGYQPTLATDLGGLQER-I	00000000000000000000000	353	373	1093.57	2	-3.1729	6.115e-12	55	Os01g0685800|AK064953IPSAVGYQPTLATDLGGLQER00000000000000000000000
AK064953	Os01g0685800	Similar to ATP synthase beta chain, mitochondrial precursor (EC 3.6.3.14). (Os01t0685800-01), Similar to ATP synthase subunit beta, mitochondrial. (Os01t0685800-02)	59639.1	R-QISELGIYPAVDPLDSTSR-M	000000000000000000000	416	434	1031.03	2	1.18261	4.91966e-09	55	Os01g0685800|AK064953QISELGIYPAVDPLDSTSR000000000000000000000
AK064953	Os01g0685800	Similar to ATP synthase beta chain, mitochondrial precursor (EC 3.6.3.14). (Os01t0685800-01), Similar to ATP synthase subunit beta, mitochondrial. (Os01t0685800-02)	59639.1	R-QISELGIYPAVDPLDSTSR-M	200000000000000000000	416	434	1022.52	2	0.613567	0.0308332	55	Os01g0685800|AK064953QISELGIYPAVDPLDSTSR200000000000000000000
AK064953	Os01g0685800	Similar to ATP synthase beta chain, mitochondrial precursor (EC 3.6.3.14). (Os01t0685800-01), Similar to ATP synthase subunit beta, mitochondrial. (Os01t0685800-02)	59639.1	R-MLSPHVLGEDHYNTAR-G	030000000000000000	435	450	928.441	2	-0.399699	7.31506e-08	55	Os01g0685800|AK064953MLSPHVLGEDHYNTAR030000000000000000
AK064953	Os01g0685800	Similar to ATP synthase beta chain, mitochondrial precursor (EC 3.6.3.14). (Os01t0685800-01), Similar to ATP synthase subunit beta, mitochondrial. (Os01t0685800-02)	59639.1	R-MLSPHVLGEDHYNTAR-G	000000000000000000	435	450	613.965	3	0.341478	0.0010627	55	Os01g0685800|AK064953MLSPHVLGEDHYNTAR000000000000000000
AK064953	Os01g0685800	Similar to ATP synthase beta chain, mitochondrial precursor (EC 3.6.3.14). (Os01t0685800-01), Similar to ATP synthase subunit beta, mitochondrial. (Os01t0685800-02)	59639.1	K-ESVQSFQGVLDGK-Y	000000000000000	514	526	697.348	2	-4.67813	0.000107151	55	Os01g0685800|AK064953ESVQSFQGVLDGK000000000000000
AK121587	Os01g0686800	Guanine nucleotide-binding protein beta subunit-like protein (GPB-LR) (RWD). (Os01t0686800-01)	36777.3	R-LWDLSTGVTTR-R	0000000000000	101	111	624.832	2	-0.613575	0.00158287	3	Os01g0686800|AK121587LWDLSTGVTTR0000000000000
AK121587	Os01g0686800	Guanine nucleotide-binding protein beta subunit-like protein (GPB-LR) (RWD). (Os01t0686800-01)	36777.3	K-HIVQDLKPEIPVSK-N	0000000000000000	282	295	801.966	2	2.02373	0.00153667	3	Os01g0686800|AK121587HIVQDLKPEIPVSK0000000000000000
AK066430	Os01g0690800	Protein kinase, core domain containing protein. (Os01t0690800-01)	74804.4	K-GFDLAWNSR-K	00000000000	239	247	533.253	2	-11.5945	0.0106891	1	Os01g0690800|AK066430GFDLAWNSR00000000000
AK068018	Os01g0691700	Similar to Serine/threonine protein phosphatase 2A. (Os01t0691700-01)	35393.3	K-FFTETEENNQMR-G	00000000000300	282	293	781.335	2	2.02533	0.00704742	1	Os01g0691700|AK068018FFTETEENNQMR00000000000300
AK111036	Os01g0692200	Conserved hypothetical protein. (Os01t0692200-01)	26288.2	R-CVTAALDARR-R	000000000000	82	91	573.81	2	7.43191	0.042663	1	Os01g0692200|AK111036CVTAALDARR000000000000
AY551100	Os01g0695100	Similar to Phosphoethanolamine N-methyltransferase. (Os01t0695100-01)	57602.7	R-FLDNVQYK-A	0000000000	249	256	513.767	2	0.932446	0.0172241	1	Os01g0695100|AY551100FLDNVQYK0000000000
AK065538	Os01g0703600	Similar to Mu1 adaptin. (Os01t0703600-01), Similar to predicted protein. (Os01t0703600-02)	49228.2	R-YITMAGEYELR-L	0000300000000	417	427	681.324	2	0.364925	0.0141707	1	Os01g0703600|AK065538YITMAGEYELR0000300000000
AK059936	Os01g0706000	Similar to RNA polymerase II transcriptional coactivator KELP. (Os01t0706000-01), Similar to RNA polymerase II transcriptional coactivator KELP. (Os01t0706000-02), Similar to RNA polymerase II transcriptional coactivator KELP. (Os01t0706000-03)	21086.4	K-VESTVLEILR-G	000000000000	9	18	579.841	2	1.30413	0.0102978	2	Os01g0706000|AK059936VESTVLEILR000000000000
AK059936	Os01g0706000	Similar to RNA polymerase II transcriptional coactivator KELP. (Os01t0706000-01), Similar to RNA polymerase II transcriptional coactivator KELP. (Os01t0706000-02), Similar to RNA polymerase II transcriptional coactivator KELP. (Os01t0706000-03)	21086.4	R-GSDMESLTEFK-V	0000300000000	19	29	630.28	2	5.95687	0.0417877	2	Os01g0706000|AK059936GSDMESLTEFK0000300000000
Os01g0706500	Os01g0706500	Ribosomal protein L28e domain containing protein. (Os01t0706500-00)	16272.7	K-NQVSDNYYRPDLTKPALAR-L	000000000000000000000	104	122	741.051	3	1.47742	0.000275382	1	Os01g0706500|Os01g0706500NQVSDNYYRPDLTKPALAR000000000000000000000
AK104463	Os01g0707300	Similar to Vesicle transport v-SNARE 13 (AtVTI13) (Vesicle transport v-SNARE protein VTI13) (Vesicle soluble NSF attachment protein receptor 13). (Os01t0707300-01), Similar to vesicle transport v-SNARE 13. (Os01t0707300-02)	24988.2	K-LSEIQSGVEEAESLIR-K	000000000000000000	38	53	880.457	2	0.187188	0.00453272	1	Os01g0707300|AK104463LSEIQSGVEEAESLIR000000000000000000
AK101457	Os01g0708100	Similar to N-myristoyl transferase (EC 2.3.1.97). (Os01t0708100-01)	49962.5	K-LPEAPLTPGFR-Q	0000000000000	268	278	599.334	2	-1.91724	0.0102605	1	Os01g0708100|AK101457LPEAPLTPGFR0000000000000
AK111794	Os01g0710000	Similar to WD-repeat protein RBAP1. (Os01t0710000-01)	50719.1	R-VAAAEHISQFNEEAR-S	00000000000000000	83	97	836.406	2	-1.87482	2.08852e-05	2	Os01g0710000|AK111794VAAAEHISQFNEEAR00000000000000000
AK103899	Os01g0711000	Similar to Vacuolar ATP synthase subunit B isoform 2 (EC 3.6.3.14) (V-ATPase B subunit 2) (Vacuolar proton pump B subunit 2). (Os01t0711000-01)	54387.7	R-TVSGVAGPLVILDK-V	0000000000000000	23	36	684.909	2	0.290852	3.25045e-07	31	Os01g0711000|AK103899TVSGVAGPLVILDK0000000000000000
AK103899	Os01g0711000	Similar to Vacuolar ATP synthase subunit B isoform 2 (EC 3.6.3.14) (V-ATPase B subunit 2) (Vacuolar proton pump B subunit 2). (Os01t0711000-01)	54387.7	R-TVSGVAGPLVILDKVK-G	000000000000000000	23	38	532.662	3	-1.50717	0.00342962	31	Os01g0711000|AK103899TVSGVAGPLVILDKVK000000000000000000
AK103899	Os01g0711000	Similar to Vacuolar ATP synthase subunit B isoform 2 (EC 3.6.3.14) (V-ATPase B subunit 2) (Vacuolar proton pump B subunit 2). (Os01t0711000-01)	54387.7	K-YQEIVNIR-L	0000000000	42	49	517.785	2	0.375872	0.00190667	31	Os01g0711000|AK103899YQEIVNIR0000000000
AK103899	Os01g0711000	Similar to Vacuolar ATP synthase subunit B isoform 2 (EC 3.6.3.14) (V-ATPase B subunit 2) (Vacuolar proton pump B subunit 2). (Os01t0711000-01)	54387.7	R-RGQVLEVDGEK-A	0000000000000	57	67	615.328	2	0.0397511	0.00116027	31	Os01g0711000|AK103899RGQVLEVDGEK0000000000000
AK103899	Os01g0711000	Similar to Vacuolar ATP synthase subunit B isoform 2 (EC 3.6.3.14) (V-ATPase B subunit 2) (Vacuolar proton pump B subunit 2). (Os01t0711000-01)	54387.7	K-AVVQVFEGTSGIDNK-Y	00000000000000000	68	82	782.405	2	0.929267	9.80527e-08	31	Os01g0711000|AK103899AVVQVFEGTSGIDNK00000000000000000
AK103899	Os01g0711000	Similar to Vacuolar ATP synthase subunit B isoform 2 (EC 3.6.3.14) (V-ATPase B subunit 2) (Vacuolar proton pump B subunit 2). (Os01t0711000-01)	54387.7	K-YTTVQFTGEVLK-T	00000000000000	83	94	693.371	2	2.91051	0.000340622	31	Os01g0711000|AK103899YTTVQFTGEVLK00000000000000
AK103899	Os01g0711000	Similar to Vacuolar ATP synthase subunit B isoform 2 (EC 3.6.3.14) (V-ATPase B subunit 2) (Vacuolar proton pump B subunit 2). (Os01t0711000-01)	54387.7	K-TPVSLDMLGR-V	000000030000	95	104	552.79	2	0.820696	1.36571e-05	31	Os01g0711000|AK103899TPVSLDMLGR000000030000
AK103899	Os01g0711000	Similar to Vacuolar ATP synthase subunit B isoform 2 (EC 3.6.3.14) (V-ATPase B subunit 2) (Vacuolar proton pump B subunit 2). (Os01t0711000-01)	54387.7	R-TYPEEMIQTGISTIDVMNSIAR-G	000000300000000003000000	138	159	1251.09	2	-2.94624	5.12116e-08	31	Os01g0711000|AK103899TYPEEMIQTGISTIDVMNSIAR000000300000000003000000
AK103899	Os01g0711000	Similar to Vacuolar ATP synthase subunit B isoform 2 (EC 3.6.3.14) (V-ATPase B subunit 2) (Vacuolar proton pump B subunit 2). (Os01t0711000-01)	54387.7	K-RDFEENGSMER-V	0000000003000	224	234	693.29	2	-1.3186	0.000965503	31	Os01g0711000|AK103899RDFEENGSMER0000000003000
AK103899	Os01g0711000	Similar to Vacuolar ATP synthase subunit B isoform 2 (EC 3.6.3.14) (V-ATPase B subunit 2) (Vacuolar proton pump B subunit 2). (Os01t0711000-01)	54387.7	R-DFEENGSMER-V	000000003000	225	234	615.24	2	-0.45923	1.16453e-06	31	Os01g0711000|AK103899DFEENGSMER000000003000
AK103899	Os01g0711000	Similar to Vacuolar ATP synthase subunit B isoform 2 (EC 3.6.3.14) (V-ATPase B subunit 2) (Vacuolar proton pump B subunit 2). (Os01t0711000-01)	54387.7	R-DFEENGSMER-V	000000000000	225	234	607.244	2	0.865596	0.000397413	31	Os01g0711000|AK103899DFEENGSMER000000000000
AK103899	Os01g0711000	Similar to Vacuolar ATP synthase subunit B isoform 2 (EC 3.6.3.14) (V-ATPase B subunit 2) (Vacuolar proton pump B subunit 2). (Os01t0711000-01)	54387.7	R-VTLFLNLANDPTIER-I	00000000000000000	235	249	858.474	2	4.90935	3.57298e-06	31	Os01g0711000|AK103899VTLFLNLANDPTIER00000000000000000
AK103899	Os01g0711000	Similar to Vacuolar ATP synthase subunit B isoform 2 (EC 3.6.3.14) (V-ATPase B subunit 2) (Vacuolar proton pump B subunit 2). (Os01t0711000-01)	54387.7	R-GYPGYMYTDLATIYER-A	000000300000000000	300	315	964.941	2	0.627362	3.88137e-09	31	Os01g0711000|AK103899GYPGYMYTDLATIYER000000300000000000
AK103899	Os01g0711000	Similar to Vacuolar ATP synthase subunit B isoform 2 (EC 3.6.3.14) (V-ATPase B subunit 2) (Vacuolar proton pump B subunit 2). (Os01t0711000-01)	54387.7	R-QIYPPINVLPSLSR-L	0000000000000000	365	378	798.961	2	2.07821	8.19552e-05	31	Os01g0711000|AK103899QIYPPINVLPSLSR0000000000000000
AK103899	Os01g0711000	Similar to Vacuolar ATP synthase subunit B isoform 2 (EC 3.6.3.14) (V-ATPase B subunit 2) (Vacuolar proton pump B subunit 2). (Os01t0711000-01)	54387.7	K-SAIGEGMTR-R	00000003000	382	390	469.225	2	2.05855	0.00133837	31	Os01g0711000|AK103899SAIGEGMTR00000003000
AK103899	Os01g0711000	Similar to Vacuolar ATP synthase subunit B isoform 2 (EC 3.6.3.14) (V-ATPase B subunit 2) (Vacuolar proton pump B subunit 2). (Os01t0711000-01)	54387.7	R-RDHSDVSNQLYANYAIGK-D	00000000000000000000	391	408	684.335	3	-1.1887	2.05058e-06	31	Os01g0711000|AK103899RDHSDVSNQLYANYAIGK00000000000000000000
AK103899	Os01g0711000	Similar to Vacuolar ATP synthase subunit B isoform 2 (EC 3.6.3.14) (V-ATPase B subunit 2) (Vacuolar proton pump B subunit 2). (Os01t0711000-01)	54387.7	R-DHSDVSNQLYANYAIGK-D	0000000000000000000	392	408	947.95	2	0.214446	3.5876e-11	31	Os01g0711000|AK103899DHSDVSNQLYANYAIGK0000000000000000000
AK103899	Os01g0711000	Similar to Vacuolar ATP synthase subunit B isoform 2 (EC 3.6.3.14) (V-ATPase B subunit 2) (Vacuolar proton pump B subunit 2). (Os01t0711000-01)	54387.7	R-KFVTQGAYDTR-N	0000000000000	439	449	643.33	2	-0.0364715	7.74853e-06	31	Os01g0711000|AK103899KFVTQGAYDTR0000000000000
AK103899	Os01g0711000	Similar to Vacuolar ATP synthase subunit B isoform 2 (EC 3.6.3.14) (V-ATPase B subunit 2) (Vacuolar proton pump B subunit 2). (Os01t0711000-01)	54387.7	K-FVTQGAYDTR-N	000000000000	440	449	579.282	2	-2.2506	2.71321e-06	31	Os01g0711000|AK103899FVTQGAYDTR000000000000
AK103899	Os01g0711000	Similar to Vacuolar ATP synthase subunit B isoform 2 (EC 3.6.3.14) (V-ATPase B subunit 2) (Vacuolar proton pump B subunit 2). (Os01t0711000-01)	54387.7	K-TLDQYYSR-D	0000000000	477	484	523.255	2	6.67414	0.00288278	31	Os01g0711000|AK103899TLDQYYSR0000000000
AY346327	Os01g0711400	Similar to Victorin binding protein. (Os01t0711400-01)	112634	K-GNINIEELR-K	00000000000	688	696	529.289	2	7.51748	0.00457297	3	Os01g0711400|AY346327GNINIEELR00000000000
AY346327	Os01g0711400	Similar to Victorin binding protein. (Os01t0711400-01)	112634	K-IAILNANYMAK-R	0000000003000	849	859	619.331	2	-4.87395	0.000839123	3	Os01g0711400|AY346327IAILNANYMAK0000000003000
AY346327	Os01g0711400	Similar to Victorin binding protein. (Os01t0711400-01)	112634	K-TTAGIEPEDVAK-R	00000000000000	889	900	615.814	2	-0.850327	0.0418985	3	Os01g0711400|AY346327TTAGIEPEDVAK00000000000000
AK111495	Os01g0714900	Similar to RAB7A. (Os01t0714900-01)	23601.8	K-ATIGADFVTK-E	000000000000	40	49	511.78	2	1.00431	3.52244e-06	3	Os01g0714900|AK111495ATIGADFVTK000000000000
AK111495	Os01g0714900	Similar to RAB7A. (Os01t0714900-01)	23601.8	R-FQSLGVAFYR-G	000000000000	71	80	594.315	2	1.33793	4.40305e-05	3	Os01g0714900|AK111495FQSLGVAFYR000000000000
AK111495	Os01g0714900	Similar to RAB7A. (Os01t0714900-01)	23601.8	R-NVDSAFLSVAK-L	0000000000000	165	175	575.808	2	-1.67645	0.0016531	3	Os01g0714900|AK111495NVDSAFLSVAK0000000000000
Os01g0715500	Os01g0715500	Similar to voltage-dependent anion channel protein 2. (Os01t0715500-00)	33988.4	K-DAPPAVAAPGPGLYFEIGKK-A	0000000000000000000000	35	54	666.695	3	0.592579	0.029505	8	Os01g0715500|Os01g0715500DAPPAVAAPGPGLYFEIGKK0000000000000000000000
Os01g0715500	Os01g0715500	Similar to voltage-dependent anion channel protein 2. (Os01t0715500-00)	33988.4	K-DEAIFSEIQTK-L	0000000000000	98	108	640.824	2	2.31369	0.0161603	8	Os01g0715500|Os01g0715500DEAIFSEIQTK0000000000000
Os01g0715500	Os01g0715500	Similar to voltage-dependent anion channel protein 2. (Os01t0715500-00)	33988.4	K-SVAVGADVAVDTSTGDFTK-Y	000000000000000000000	181	199	920.452	2	0.214876	7.69257e-06	8	Os01g0715500|Os01g0715500SVAVGADVAVDTSTGDFTK000000000000000000000
Os01g0715500	Os01g0715500	Similar to voltage-dependent anion channel protein 2. (Os01t0715500-00)	33988.4	K-GDSLTASYYHLVNK-E	0000000000000000	221	234	784.397	2	7.37263	0.00135406	8	Os01g0715500|Os01g0715500GDSLTASYYHLVNK0000000000000000
Os01g0715500	Os01g0715500	Similar to voltage-dependent anion channel protein 2. (Os01t0715500-00)	33988.4	K-ESGTAAGAELTHSFSTK-E	0000000000000000000	235	251	847.406	2	1.23878	0.00197065	8	Os01g0715500|Os01g0715500ESGTAAGAELTHSFSTK0000000000000000000
Os01g0715500	Os01g0715500	Similar to voltage-dependent anion channel protein 2. (Os01t0715500-00)	33988.4	K-SFLTLSAEVDTK-A	00000000000000	291	302	655.843	2	-3.75732	1.4218e-05	8	Os01g0715500|Os01g0715500SFLTLSAEVDTK00000000000000
Os01g0715500	Os01g0715500	Similar to voltage-dependent anion channel protein 2. (Os01t0715500-00)	33988.4	K-VGLSLVLKP--	00000000000	310	318	463.307	2	-1.71435	0.0018044	8	Os01g0715500|Os01g0715500VGLSLVLKP00000000000
Os01g0716300	Os01g0716300	Hypothetical conserved gene. (Os01t0716300-00)	28065.1	K-RPKVTSLKR-A	00000000000	133	141	542.845	2	-12.052	0.0161998	1	Os01g0716300|Os01g0716300RPKVTSLKR00000000000
AK121195	Os01g0719300	Similar to Sulfate transporter 3.1 (AST12) (AtST1). (Os01t0719300-01)	73318.7	K-GINPLSIAQLTFQSR-H	00000000000000000	324	338	822.96	2	3.49407	0.00187269	1	Os01g0719300|AK121195GINPLSIAQLTFQSR00000000000000000
AK062725	Os01g0720500	Similar to Type I chlorophyll a/b-binding protein b (Fragment). (Os01t0720500-01), Non-protein coding transcript. (Os01t0720500-02)	28097.2	K-FGEAVWFK-A	0000000000	125	132	492.252	2	-1.54989	0.000196302	2	Os01g0720500|AK062725FGEAVWFK0000000000
AK121001	Os01g0721900	Similar to Nuclear RNA binding protein B (Fragment). (Os01t0721900-01), Similar to plasminogen activator inhibitor 1 RNA-binding protein. (Os01t0721900-02)	40401.8	K-QGEQDDAPTGEKDNK-E	20000000000000000	215	229	807.848	2	0.074797	0.0278049	1	Os01g0721900|AK121001QGEQDDAPTGEKDNK20000000000000000
J090011E02	Os01g0722800	Dimethylmenaquinone methyltransferase family protein. (Os01t0722800-00)	18408.5	R-ALQPIFQIYGR-R	0000000000000	26	36	653.371	2	2.90122	0.0442948	2	Os01g0722800|J090011E02ALQPIFQIYGR0000000000000
J090011E02	Os01g0722800	Dimethylmenaquinone methyltransferase family protein. (Os01t0722800-00)	18408.5	K-VYEDNVLIR-E	00000000000	49	57	560.804	2	1.06886	0.00173727	2	Os01g0722800|J090011E02VYEDNVLIR00000000000
AK099646	Os01g0723400	Malic oxidoreductase family protein. (Os01t0723400-01), Similar to Malic enzyme. (Os01t0723400-02), Similar to Malic enzyme. (Os01t0723400-03)	65737.1	R-SIQVIVVTDGER-I	00000000000000	182	193	658.364	2	-1.29821	4.12534e-08	2	Os01g0723400|AK099646SIQVIVVTDGER00000000000000
AK099646	Os01g0723400	Malic oxidoreductase family protein. (Os01t0723400-01), Similar to Malic enzyme. (Os01t0723400-02), Similar to Malic enzyme. (Os01t0723400-03)	65737.1	K-AYELGLASR-R	00000000000	560	568	490.265	2	1.29867	0.0168522	2	Os01g0723400|AK099646AYELGLASR00000000000
AK062498	Os01g0732000	Similar to Mitochondrial import receptor subunit TOM7-1 (Translocase of outer membrane 7 kDa subunit 1). (Os01t0732000-01)	7356.9	K-GKAPADTEQTAAATAAR-L	0000000000000000000	9	25	815.413	2	-0.768599	5.68519e-05	3	Os01g0732000|AK062498GKAPADTEQTAAATAAR0000000000000000000
AK062498	Os01g0732000	Similar to Mitochondrial import receptor subunit TOM7-1 (Translocase of outer membrane 7 kDa subunit 1). (Os01t0732000-01)	7356.9	K-APADTEQTAAATAAR-L	00000000000000000	11	25	722.854	2	-1.89953	0.000579231	3	Os01g0732000|AK062498APADTEQTAAATAAR00000000000000000
AK121245	Os01g0736900	Reticulon family protein. (Os01t0736900-01), Similar to seed maturation protein. (Os01t0736900-02)	28550.1	M-AEHKEEQSVMEK-L	10000000003000	2	13	501.565	3	1.3285	0.00356777	4	Os01g0736900|AK121245AEHKEEQSVMEK10000000003000
AK121245	Os01g0736900	Reticulon family protein. (Os01t0736900-01), Similar to seed maturation protein. (Os01t0736900-02)	28550.1	K-SPPNIPEVK-I	00000000000	129	137	490.775	2	2.43908	0.0120411	4	Os01g0736900|AK121245SPPNIPEVK00000000000
AK121245	Os01g0736900	Reticulon family protein. (Os01t0736900-01), Similar to seed maturation protein. (Os01t0736900-02)	28550.1	K-YEDKVDAFGEK-A	0000000000000	213	223	650.805	2	-2.28133	9.22295e-05	4	Os01g0736900|AK121245YEDKVDAFGEK0000000000000
AK069568	Os01g0739000	Similar to Mitochondrial processing peptidase. (Os01t0739000-01), Similar to Mitochondrial processing peptidase. (Os01t0739000-02)	54406.9	R-EVEAIGGNVSASASR-E	00000000000000000	134	148	723.862	2	-0.40421	9.5165e-09	10	Os01g0739000|AK069568EVEAIGGNVSASASR00000000000000000
AK069568	Os01g0739000	Similar to Mitochondrial processing peptidase. (Os01t0739000-01), Similar to Mitochondrial processing peptidase. (Os01t0739000-02)	54406.9	K-AYVPEMVEVLIDSVR-N	00000030000000000	160	174	868.452	2	2.10073	0.00017274	10	Os01g0739000|AK069568AYVPEMVEVLIDSVR00000030000000000
AK069568	Os01g0739000	Similar to Mitochondrial processing peptidase. (Os01t0739000-01), Similar to Mitochondrial processing peptidase. (Os01t0739000-02)	54406.9	K-VTQEQLDR-A	0000000000	405	412	494.756	2	-1.48458	0.000255669	10	Os01g0739000|AK069568VTQEQLDR0000000000
AK069568	Os01g0739000	Similar to Mitochondrial processing peptidase. (Os01t0739000-01), Similar to Mitochondrial processing peptidase. (Os01t0739000-02)	54406.9	K-SAVLMNLESR-V	000003000000	419	428	568.293	2	1.07676	0.00013495	10	Os01g0739000|AK069568SAVLMNLESR000003000000
AK069568	Os01g0739000	Similar to Mitochondrial processing peptidase. (Os01t0739000-01), Similar to Mitochondrial processing peptidase. (Os01t0739000-02)	54406.9	R-VVASEDIGR-Q	00000000000	429	437	473.254	2	0.655756	6.46786e-05	10	Os01g0739000|AK069568VVASEDIGR00000000000
AK069568	Os01g0739000	Similar to Mitochondrial processing peptidase. (Os01t0739000-01), Similar to Mitochondrial processing peptidase. (Os01t0739000-02)	54406.9	R-QILTYGER-K	0000000000	438	445	490.261	2	-5.37383	0.000389346	10	Os01g0739000|AK069568QILTYGER0000000000
AK069568	Os01g0739000	Similar to Mitochondrial processing peptidase. (Os01t0739000-01), Similar to Mitochondrial processing peptidase. (Os01t0739000-02)	54406.9	K-DLEAITLNDISSTAK-K	00000000000000000	454	468	795.915	2	0.918532	4.05965e-07	10	Os01g0739000|AK069568DLEAITLNDISSTAK00000000000000000
AK063421	Os01g0742200	Similar to Elongation factor EF-2 (Fragment). (Os01t0742200-01)	93148.3	R-GGGQIIPTAR-R	000000000000	700	709	485.277	2	-1.13205	0.0289885	1	Os01g0742200|AK063421GGGQIIPTAR000000000000
AK065656	Os01g0742500	Similar to Hexokinase. (Os01t0742500-01)	55299.6	R-RAAAVIEEVEQR-F	00000000000000	44	55	685.873	2	0.239488	0.0417032	19	Os01g0742500|AK065656RAAAVIEEVEQR00000000000000
AK065656	Os01g0742500	Similar to Hexokinase. (Os01t0742500-01)	55299.6	R-AAAVIEEVEQR-F	0000000000000	45	55	607.823	2	1.39119	1.70188e-07	19	Os01g0742500|AK065656AAAVIEEVEQR0000000000000
AK065656	Os01g0742500	Similar to Hexokinase. (Os01t0742500-01)	55299.6	R-GIADAMVEEMER-G	00000030003000	65	76	691.798	2	-3.20003	7.03182e-07	19	Os01g0742500|AK065656GIADAMVEEMER00000030003000
AK065656	Os01g0742500	Similar to Hexokinase. (Os01t0742500-01)	55299.6	R-GIADAMVEEMER-G	00000000000000	65	76	675.805	2	0.223843	0.000614218	19	Os01g0742500|AK065656GIADAMVEEMER00000000000000
AK065656	Os01g0742500	Similar to Hexokinase. (Os01t0742500-01)	55299.6	K-TEGEDFHLPEGR-Q	00000000000000	165	176	693.818	2	0.383549	0.00442743	19	Os01g0742500|AK065656TEGEDFHLPEGR00000000000000
AK065656	Os01g0742500	Similar to Hexokinase. (Os01t0742500-01)	55299.6	K-VTALVNDTVGTLAGGR-Y	000000000000000000	232	247	772.428	2	3.11209	3.92798e-08	19	Os01g0742500|AK065656VTALVNDTVGTLAGGR000000000000000000
AK065656	Os01g0742500	Similar to Hexokinase. (Os01t0742500-01)	55299.6	R-YVDNDVAAAVILGTGTNAAYVEHANAIPK-W	0000000000000000000000000000000	248	276	986.507	3	2.33752	8.31243e-06	19	Os01g0742500|AK065656YVDNDVAAAVILGTGTNAAYVEHANAIPK0000000000000000000000000000000
AK065656	Os01g0742500	Similar to Hexokinase. (Os01t0742500-01)	55299.6	K-MISGMYLGEIVR-R	03000300000000	325	336	700.85	2	0.942498	0.00157503	19	Os01g0742500|AK065656MISGMYLGEIVR03000300000000
AK065656	Os01g0742500	Similar to Hexokinase. (Os01t0742500-01)	55299.6	K-LAHDASLFGDVVPTK-L	00000000000000000	342	356	523.947	3	-0.176523	0.0167799	19	Os01g0742500|AK065656LAHDASLFGDVVPTK00000000000000000
AK065656	Os01g0742500	Similar to Hexokinase. (Os01t0742500-01)	55299.6	K-LKDILGVADTSLEAR-Y	00000000000000000	386	400	800.951	2	2.19774	8.03645e-06	19	Os01g0742500|AK065656LKDILGVADTSLEAR00000000000000000
AK065656	Os01g0742500	Similar to Hexokinase. (Os01t0742500-01)	55299.6	K-DILGVADTSLEAR-Y	000000000000000	388	400	680.36	2	0.837286	8.69874e-07	19	Os01g0742500|AK065656DILGVADTSLEAR000000000000000
AK065656	Os01g0742500	Similar to Hexokinase. (Os01t0742500-01)	55299.6	R-LAAAGIYGILK-K	0000000000000	417	427	545.337	2	0.604014	1.84243e-07	19	Os01g0742500|AK065656LAAAGIYGILK0000000000000
AK065656	Os01g0742500	Similar to Hexokinase. (Os01t0742500-01)	55299.6	R-LAAAGIYGILKK-L	00000000000000	417	428	609.385	2	1.56047	0.0129827	19	Os01g0742500|AK065656LAAAGIYGILKK00000000000000
AK065656	Os01g0742500	Similar to Hexokinase. (Os01t0742500-01)	55299.6	R-TVIALDGGLYEHYK-K	0000000000000000	444	457	789.912	2	0.760506	0.000202368	19	Os01g0742500|AK065656TVIALDGGLYEHYK0000000000000000
AK073858	Os01g0743500	Cytosolic NADP malic enzyme. (Os01t0743500-01)	64726.7	K-SIQVIVVTDGER-I	00000000000000	175	186	658.364	2	-1.29821	4.12534e-08	1	Os01g0743500|AK073858SIQVIVVTDGER00000000000000
AK060095	Os01g0750000	Similar to ras-related protein RIC2. (Os01t0750000-01), Similar to Ras-related protein RIC2. (Os01t0750000-02)	24391.3	K-STIGVEFATR-S	000000000000	49	58	540.789	2	1.69898	9.63469e-05	3	Os01g0750000|AK060095STIGVEFATR000000000000
AK060095	Os01g0750000	Similar to ras-related protein RIC2. (Os01t0750000-01), Similar to Ras-related protein RIC2. (Os01t0750000-02)	24391.3	K-AQIWDTAGQER-Y	0000000000000	69	79	637.81	2	0.082183	0.00547705	3	Os01g0750000|AK060095AQIWDTAGQER0000000000000
AK060095	Os01g0750000	Similar to ras-related protein RIC2. (Os01t0750000-01), Similar to Ras-related protein RIC2. (Os01t0750000-02)	24391.3	R-AITSAYYR-G	0000000000	82	89	472.746	2	1.52505	0.00786806	3	Os01g0750000|AK060095AITSAYYR0000000000
AK060095	Os01g0750000	Similar to ras-related protein RIC2. (Os01t0750000-01), Similar to Ras-related protein RIC2. (Os01t0750000-02)	24391.3	R-GAVGALLVYDVTR-R	000000000000000	90	102	667.378	2	0.306709	0.000342269	3	Os01g0750000|AK060095GAVGALLVYDVTR000000000000000
Os01g0753150	Os01g0753150	#N/A	22206.8	R-FTTNMQR-R	000003000	48	54	457.208	2	-12.4898	0.0310883	1	Os01g0753150|Os01g0753150FTTNMQR000003000
AK103586	Os01g0760600	Aspartate aminotransferase, cytoplasmic (EC 2.6.1.1) (Transaminase A). (Os01t0760600-01)	50115.6	K-VNLGVGAYR-T	00000000000	87	95	474.767	2	1.12238	0.000999266	13	Os01g0760600|AK103586VNLGVGAYR00000000000
AK103586	Os01g0760600	Aspartate aminotransferase, cytoplasmic (EC 2.6.1.1) (Transaminase A). (Os01t0760600-01)	50115.6	R-TEEGKPLVLNVVR-R	000000000000000	96	108	727.422	2	-0.898508	0.00103714	13	Os01g0760600|AK103586TEEGKPLVLNVVR000000000000000
AK103586	Os01g0760600	Aspartate aminotransferase, cytoplasmic (EC 2.6.1.1) (Transaminase A). (Os01t0760600-01)	50115.6	R-VKEYLPITGLADFNK-L	00000000000000000	121	135	854.47	2	0.202811	0.000203651	13	Os01g0760600|AK103586VKEYLPITGLADFNK00000000000000000
AK103586	Os01g0760600	Aspartate aminotransferase, cytoplasmic (EC 2.6.1.1) (Transaminase A). (Os01t0760600-01)	50115.6	K-LIFGADSPAIQENR-V	0000000000000000	140	153	765.899	2	0.0814962	6.41481e-07	13	Os01g0760600|AK103586LIFGADSPAIQENR0000000000000000
AK103586	Os01g0760600	Aspartate aminotransferase, cytoplasmic (EC 2.6.1.1) (Transaminase A). (Os01t0760600-01)	50115.6	K-VFTLAGLTVR-S	000000000000	195	204	538.827	2	1.25594	0.0175251	13	Os01g0760600|AK103586VFTLAGLTVR000000000000
AK103586	Os01g0760600	Aspartate aminotransferase, cytoplasmic (EC 2.6.1.1) (Transaminase A). (Os01t0760600-01)	50115.6	R-MFVADGGELLMAQSYAK-N	0300000000030000000	290	306	931.935	2	-1.65123	4.7709e-09	13	Os01g0760600|AK103586MFVADGGELLMAQSYAK0300000000030000000
AK103586	Os01g0760600	Aspartate aminotransferase, cytoplasmic (EC 2.6.1.1) (Transaminase A). (Os01t0760600-01)	50115.6	K-NMGLYGER-V	0030000000	307	314	478.219	2	0.0532107	0.00323192	13	Os01g0760600|AK103586NMGLYGER0030000000
AK103586	Os01g0760600	Aspartate aminotransferase, cytoplasmic (EC 2.6.1.1) (Transaminase A). (Os01t0760600-01)	50115.6	K-DSAMFNEWTVELK-G	000030000000000	360	372	793.365	2	1.99591	1.08558e-06	13	Os01g0760600|AK103586DSAMFNEWTVELK000030000000000
AK103586	Os01g0760600	Aspartate aminotransferase, cytoplasmic (EC 2.6.1.1) (Transaminase A). (Os01t0760600-01)	50115.6	R-ISMAGLSGR-T	00030000000	435	443	454.237	2	-0.507419	7.40902e-05	13	Os01g0760600|AK103586ISMAGLSGR00030000000
AK063778	Os01g0763300	Conserved hypothetical protein. (Os01t0763300-01)	15576.9	M-AASASAAGAGAGK-S	100000000000000	2	14	516.258	2	-1.83174	2.97945e-06	1	Os01g0763300|AK063778AASASAAGAGAGK100000000000000
AK059818	Os01g0764000	Similar to Glutathione S-transferase I (EC 2.5.1.18) (GST-I) (GST-29) (GST class- phi). (Os01t0764000-01), Similar to Glutathione s-transferase ii (Fragment). (Os01t0764000-02)	24387.4	K-GEHKAPDHLAR-N	0000000000000	39	49	615.819	2	-1.82142	0.0337096	8	Os01g0764000|AK059818GEHKAPDHLAR0000000000000
AK059818	Os01g0764000	Similar to Glutathione S-transferase I (EC 2.5.1.18) (GST-I) (GST-29) (GST class- phi). (Os01t0764000-01), Similar to Glutathione s-transferase ii (Fragment). (Os01t0764000-02)	24387.4	K-VVEENLEK-L	0000000000	132	139	480.255	2	-2.59006	0.00191158	8	Os01g0764000|AK059818VVEENLEK0000000000
AK059818	Os01g0764000	Similar to Glutathione S-transferase I (EC 2.5.1.18) (GST-I) (GST-29) (GST class- phi). (Os01t0764000-01), Similar to Glutathione s-transferase ii (Fragment). (Os01t0764000-02)	24387.4	K-KVLEVYEAR-L	00000000000	142	150	553.812	2	-2.4161	0.0011045	8	Os01g0764000|AK059818KVLEVYEAR00000000000
AK059818	Os01g0764000	Similar to Glutathione S-transferase I (EC 2.5.1.18) (GST-I) (GST-29) (GST class- phi). (Os01t0764000-01), Similar to Glutathione s-transferase ii (Fragment). (Os01t0764000-02)	24387.4	K-VLEVYEAR-L	0000000000	143	150	489.767	2	0.606185	0.00554385	8	Os01g0764000|AK059818VLEVYEAR0000000000
AK059818	Os01g0764000	Similar to Glutathione S-transferase I (EC 2.5.1.18) (GST-I) (GST-29) (GST class- phi). (Os01t0764000-01), Similar to Glutathione s-transferase ii (Fragment). (Os01t0764000-02)	24387.4	K-VASLMKPPA--	00000300000	207	215	465.26	2	0.509364	0.000389654	8	Os01g0764000|AK059818VASLMKPPA00000300000
AB110205	Os01g0767000	Similar to Nuclear matrix constituent-like protein (Fragment). (Os01t0767000-01)	114113	R-AAQQSALAEAR-K	0000000000000	103	113	558.293	2	-1.69497	0.000213068	2	Os01g0767000|AB110205AAQQSALAEAR0000000000000
AB110205	Os01g0767000	Similar to Nuclear matrix constituent-like protein (Fragment). (Os01t0767000-01)	114113	R-LNQEQAIALER-R	0000000000000	341	351	642.856	2	10.4285	0.0113308	2	Os01g0767000|AB110205LNQEQAIALER0000000000000
Os01g0768400	Os01g0768400	Hypothetical conserved gene. (Os01t0768400-00)	73118.3	K-STGKMARKK-R	00000300000	6	14	511.796	2	7.98257	0.0278476	1	Os01g0768400|Os01g0768400STGKMARKK00000300000
AK059870	Os01g0781000	Vacuolar protein sorting-associated, VPS28 family protein. (Os01t0781000-01), Vacuolar protein sorting-associated, VPS28 family protein. (Os01t0781000-02)	23181.9	K-MGAGDELTEQQAR-Q	030000000000000	179	191	711.32	2	-0.193731	9.12726e-05	1	Os01g0781000|AK059870MGAGDELTEQQAR030000000000000
AK072280	Os01g0783500	Rossmann-like alpha/beta/alpha sandwich fold domain containing protein. (Os01t0783500-01)	27836.7	R-LAAAQAASAAAIHPTSPR-Y	00000000000000000000	28	45	568.645	3	0.514348	0.0352218	3	Os01g0783500|AK072280LAAAQAASAAAIHPTSPR00000000000000000000
AK072280	Os01g0783500	Rossmann-like alpha/beta/alpha sandwich fold domain containing protein. (Os01t0783500-01)	27836.7	R-YFFSSLAGTNASPHR-R	00000000000000000	46	60	827.904	2	1.73722	0.0028998	3	Os01g0783500|AK072280YFFSSLAGTNASPHR00000000000000000
AK072280	Os01g0783500	Rossmann-like alpha/beta/alpha sandwich fold domain containing protein. (Os01t0783500-01)	27836.7	R-EEDFDAFTSTK-A	0000000000000	135	145	645.281	2	1.28348	0.00219934	3	Os01g0783500|AK072280EEDFDAFTSTK0000000000000
J053048C04	Os01g0783600	Similar to frataxin. (Os01t0783600-01)	9613.94	R-LGELGTYVVNK-Q	0000000000000	18	28	596.835	2	4.64587	4.15348e-05	1	Os01g0783600|J053048C04LGELGTYVVNK0000000000000
AK059820	Os01g0784800	Flavodoxin/nitric oxide synthase domain containing protein. (Os01t0784800-01)	21690.8	K-GASSIEGVEAK-I	0000000000000	26	36	524.27	2	1.1651	0.00769725	1	Os01g0784800|AK059820GASSIEGVEAK0000000000000
Os01g0789000	Os01g0789000	Hypothetical conserved gene. (Os01t0789000-00)	51652.2	R-LTTLEIAR-K	0000000000	317	324	458.776	2	-1.85087	0.0257148	1	Os01g0789000|Os01g0789000LTTLEIAR0000000000
Os01g0791600	Os01g0791600	0	41918.2	K-DTDILAAFR-V	00000000000	33	41	511.271	2	2.6997	0.00414572	5	Os01g0791600|Os01g0791600DTDILAAFR00000000000
Os01g0791600	Os01g0791600	0	41918.2	R-AYDFVSQEIR-A	000000000000	259	268	614.303	2	-0.91986	1.15381e-06	5	Os01g0791600|Os01g0791600AYDFVSQEIR000000000000
Os01g0791600	Os01g0791600	0	41918.2	R-AAEDPEFETFYTK-N	000000000000000	269	281	774.35	2	1.47609	4.01048e-06	5	Os01g0791600|Os01g0791600AAEDPEFETFYTK000000000000000
Os01g0791600	Os01g0791600	0	41918.2	K-NILLNEGIR-A	00000000000	282	290	521.307	2	2.16249	0.00122352	5	Os01g0791600|Os01g0791600NILLNEGIR00000000000
Os01g0791600	Os01g0791600	0	41918.2	K-GIDRDLEPVLYMTPLN--	000000000000300000	364	379	931.471	2	-0.369981	0.000128351	5	Os01g0791600|Os01g0791600GIDRDLEPVLYMTPLN000000000000300000
AK120491	Os01g0796700	Zinc finger, RING/FYVE/PHD-type domain containing protein. (Os01t0796700-01)	54231	R-LSSSPSSRPR-D	000000000000	8	17	537.283	2	-11.0275	0.0469914	1	Os01g0796700|AK120491LSSSPSSRPR000000000000
AK072822	Os01g0799900	Similar to Latex-abundant protein. (Os01t0799900-01)	46424.8	R-MTLFNIFGDDASPK-V	0300000000000000	253	266	786.373	2	-1.47387	0.0106765	1	Os01g0799900|AK072822MTLFNIFGDDASPK0300000000000000
AK100951	Os01g0800300	Immunoglobulin/major histocompatibility complex, conserved site domain containing protein. (Os01t0800300-01), Immunoglobulin/major histocompatibility complex, conserved site domain containing protein. (Os01t0800300-02), Immunoglobulin/major histocompatibility complex, conserved site domain containing protein. (Os01t0800300-03)	35440.5	--MELATHDLAALGAADLVR-V	13000000000000000000	1	18	963.002	2	8.86194	0.0425048	1	Os01g0800300|AK100951MELATHDLAALGAADLVR13000000000000000000
J065116A05	Os01g0802850	#N/A	39639.9	K-EGGGGAGGEGGMSDSVIR-K	00000000000030000000	6	23	804.848	2	-1.84772	0.0133755	2	Os01g0802850|J065116A05EGGGGAGGEGGMSDSVIR00000000000030000000
J065116A05	Os01g0802850	#N/A	39639.9	K-AAQADEEAGSLLQER-D	00000000000000000	335	349	794.383	2	-1.34399	9.79909e-07	2	Os01g0802850|J065116A05AAQADEEAGSLLQER00000000000000000
AK061770	Os01g0803200	Cysteine proteinase inhibitor-I (Oryzacystatin-I). (Os01t0803200-01), Similar to Cysteine protease inhibitor. (Os01t0803200-02)	15345.9	R-FAVTEHNKK-A	00000000000	67	75	537.29	2	-0.817391	0.00601466	2	Os01g0803200|AK061770FAVTEHNKK00000000000
AK061770	Os01g0803200	Cysteine proteinase inhibitor-I (Oryzacystatin-I). (Os01t0803200-01), Similar to Cysteine protease inhibitor. (Os01t0803200-02)	15345.9	K-ELQEFKPVDASANA--	0000000000000000	127	140	759.876	2	0.333822	0.00513742	2	Os01g0803200|AK061770ELQEFKPVDASANA0000000000000000
AK103408	Os01g0805800	DNA-directed RNA polymerase, RPB5 subunit domain containing protein. (Os01t0805800-01)	24890.3	R-IQITDPIAR-Y	00000000000	173	181	513.801	2	0.193276	0.0113501	1	Os01g0805800|AK103408IQITDPIAR00000000000
L19598	Os01g0805900	Tubulin beta-2 chain (Beta-2 tubulin). (Os01t0805900-01)	51109.2	R-AVLMDLEPGTMDSVR-T	00003000000300000	63	77	833.395	2	-0.200742	1.20083e-05	15	Os01g0805900|L19598AVLMDLEPGTMDSVR00003000000300000
L19598	Os01g0805900	Tubulin beta-2 chain (Beta-2 tubulin). (Os01t0805900-01)	51109.2	R-MMLTFSVFPSPK-V	03300000000000	163	174	708.841	2	-10.9735	0.00176679	15	Os01g0805900|L19598MMLTFSVFPSPK03300000000000
L19598	Os01g0805900	Tubulin beta-2 chain (Beta-2 tubulin). (Os01t0805900-01)	51109.2	K-LAVNLIPFPR-L	000000000000	253	262	570.352	2	2.46692	1.28367e-06	15	Os01g0805900|L19598LAVNLIPFPR000000000000
L19598	Os01g0805900	Tubulin beta-2 chain (Beta-2 tubulin). (Os01t0805900-01)	51109.2	R-LHFFMVGFAPLTSR-G	0000030000000000	263	276	819.927	2	0.518311	0.00327548	15	Os01g0805900|L19598LHFFMVGFAPLTSR0000030000000000
L19598	Os01g0805900	Tubulin beta-2 chain (Beta-2 tubulin). (Os01t0805900-01)	51109.2	R-YLTASAMFR-G	00000003000	310	318	538.266	2	0.582264	0.00308439	15	Os01g0805900|L19598YLTASAMFR00000003000
L19598	Os01g0805900	Tubulin beta-2 chain (Beta-2 tubulin). (Os01t0805900-01)	51109.2	K-EVDEQMINVQNK-N	00000030000000	325	336	731.845	2	-0.73207	4.6621e-07	15	Os01g0805900|L19598EVDEQMINVQNK00000030000000
L19598	Os01g0805900	Tubulin beta-2 chain (Beta-2 tubulin). (Os01t0805900-01)	51109.2	K-EVDEQMINVQNK-N	00000000000000	325	336	723.85	2	1.82519	0.0138871	15	Os01g0805900|L19598EVDEQMINVQNK00000000000000
L19598	Os01g0805900	Tubulin beta-2 chain (Beta-2 tubulin). (Os01t0805900-01)	51109.2	K-NSSYFVEWIPNNVK-S	0000000000000000	337	350	848.923	2	2.95024	0.00969616	15	Os01g0805900|L19598NSSYFVEWIPNNVK0000000000000000
L19598	Os01g0805900	Tubulin beta-2 chain (Beta-2 tubulin). (Os01t0805900-01)	51109.2	R-RVSEQFTAMFR-R	0000000003000	380	390	694.344	2	1.44603	0.00354285	15	Os01g0805900|L19598RVSEQFTAMFR0000000003000
L19598	Os01g0805900	Tubulin beta-2 chain (Beta-2 tubulin). (Os01t0805900-01)	51109.2	R-VSEQFTAMFR-R	000000003000	381	390	616.293	2	1.16313	6.64549e-06	15	Os01g0805900|L19598VSEQFTAMFR000000003000
AF231026	Os01g0810300	Similar to Calmodulin-like protein. (Os01t0810300-01)	21106.3	R-HVMANIGER-L	00030000000	108	116	521.759	2	0.344322	0.00344854	1	Os01g0810300|AF231026HVMANIGER00030000000
AK103541	Os01g0811100	Proteasome subunit alpha type 3 (EC 3.4.25.1) (20S proteasome alpha subunit G) (20S proteasome subunit alpha-7). (Os01t0811100-01), Proteasome subunit alpha type 3 (EC 3.4.25.1) (20S proteasome alpha subunit G) (20S proteasome subunit alpha-7). (Os01t0811100-02)	27576	R-VFQVEYATK-A	00000000000	21	29	542.787	2	-0.249175	0.000387351	6	Os01g0811100|AK103541VFQVEYATK00000000000
AK103541	Os01g0811100	Proteasome subunit alpha type 3 (EC 3.4.25.1) (20S proteasome alpha subunit G) (20S proteasome subunit alpha-7). (Os01t0811100-01), Proteasome subunit alpha type 3 (EC 3.4.25.1) (20S proteasome alpha subunit G) (20S proteasome subunit alpha-7). (Os01t0811100-02)	27576	K-VYGEPISVK-E	00000000000	102	110	496.276	2	-1.0869	0.00414414	6	Os01g0811100|AK103541VYGEPISVK00000000000
AK103541	Os01g0811100	Proteasome subunit alpha type 3 (EC 3.4.25.1) (20S proteasome alpha subunit G) (20S proteasome subunit alpha-7). (Os01t0811100-01), Proteasome subunit alpha type 3 (EC 3.4.25.1) (20S proteasome alpha subunit G) (20S proteasome subunit alpha-7). (Os01t0811100-02)	27576	R-DGPQLYMIEPSGVSYK-Y	000000030000000000	144	159	900.433	2	3.49773	0.00820211	6	Os01g0811100|AK103541DGPQLYMIEPSGVSYK000000030000000000
AK103541	Os01g0811100	Proteasome subunit alpha type 3 (EC 3.4.25.1) (20S proteasome alpha subunit G) (20S proteasome subunit alpha-7). (Os01t0811100-01), Proteasome subunit alpha type 3 (EC 3.4.25.1) (20S proteasome alpha subunit G) (20S proteasome subunit alpha-7). (Os01t0811100-02)	27576	K-IIYGVHDEAK-D	000000000000	196	205	572.803	2	-0.765932	0.00886992	6	Os01g0811100|AK103541IIYGVHDEAK000000000000
AK103541	Os01g0811100	Proteasome subunit alpha type 3 (EC 3.4.25.1) (20S proteasome alpha subunit G) (20S proteasome subunit alpha-7). (Os01t0811100-01), Proteasome subunit alpha type 3 (EC 3.4.25.1) (20S proteasome alpha subunit G) (20S proteasome subunit alpha-7). (Os01t0811100-02)	27576	K-VPADLLEQAK-V	000000000000	227	236	542.306	2	0.105832	3.51228e-06	6	Os01g0811100|AK103541VPADLLEQAK000000000000
AK062929	Os01g0812800	Ribosomal protein L30e domain containing protein. (Os01t0812800-01)	12673.6	K-SEIEYYAMLGK-V	0000000030000	58	68	660.313	2	-0.209429	1.1283e-06	1	Os01g0812800|AK062929SEIEYYAMLGK0000000030000
AK121582	Os01g0812900	Conserved hypothetical protein. (Os01t0812900-01)	35172.1	R-VAADPQFPFK-V	000000000000	103	112	560.296	2	1.28095	0.00116957	7	Os01g0812900|AK121582VAADPQFPFK000000000000
AK121582	Os01g0812900	Conserved hypothetical protein. (Os01t0812900-01)	35172.1	R-MDPAFETPNK-A	030000000000	229	238	583.263	2	-0.981565	0.000741979	7	Os01g0812900|AK121582MDPAFETPNK030000000000
AK121582	Os01g0812900	Conserved hypothetical protein. (Os01t0812900-01)	35172.1	K-SDAPAASATAEEEK-E	0000000000000000	311	324	688.812	2	-0.758894	0.015906	7	Os01g0812900|AK121582SDAPAASATAEEEK0000000000000000
AK121582	Os01g0812900	Conserved hypothetical protein. (Os01t0812900-01)	35172.1	K-SDAPAASATAEEEKER-L	000000000000000000	311	326	831.383	2	-2.10178	0.000180225	7	Os01g0812900|AK121582SDAPAASATAEEEKER000000000000000000
AK121582	Os01g0812900	Conserved hypothetical protein. (Os01t0812900-01)	35172.1	R-LIAVGNDIAADAVGAGR-D	0000000000000000000	327	343	791.932	2	0.952153	8.02161e-10	7	Os01g0812900|AK121582LIAVGNDIAADAVGAGR0000000000000000000
AK065370	Os01g0813400	Similar to ADP-ribosylation factor 1. (Os01t0813400-01)	20738.8	R-ILMVGLDAAGK-T	0003000000000	20	30	552.31	2	-0.825023	2.25655e-06	12	Os01g0813400|AK065370ILMVGLDAAGK0003000000000
AK065370	Os01g0813400	Similar to ADP-ribosylation factor 1. (Os01t0813400-01)	20738.8	K-LGEIVTTIPTIGFNVETVEYK-N	00000000000000000000000	39	59	1162.12	2	-1.44352	0.0174408	12	Os01g0813400|AK065370LGEIVTTIPTIGFNVETVEYK00000000000000000000000
AK065370	Os01g0813400	Similar to ADP-ribosylation factor 1. (Os01t0813400-01)	20738.8	K-NISFTVWDVGGQDK-I	0000000000000000	60	73	783.381	2	-2.428	7.24207e-06	12	Os01g0813400|AK065370NISFTVWDVGGQDK0000000000000000
AK065370	Os01g0813400	Similar to ADP-ribosylation factor 1. (Os01t0813400-01)	20738.8	R-HYFQNTQGLIFVVDSNDR-E	00000000000000000000	80	97	718.351	3	-1.69642	0.0024861	12	Os01g0813400|AK065370HYFQNTQGLIFVVDSNDR00000000000000000000
AK065370	Os01g0813400	Similar to ADP-ribosylation factor 1. (Os01t0813400-01)	20738.8	R-HYFQNTQGLIFVVDSNDRER-V	0000000000000000000000	80	99	813.398	3	-2.52659	0.00776719	12	Os01g0813400|AK065370HYFQNTQGLIFVVDSNDRER0000000000000000000000
AK065370	Os01g0813400	Similar to ADP-ribosylation factor 1. (Os01t0813400-01)	20738.8	R-MLNEDELR-D	0300000000	110	117	518.242	2	-1.09966	0.0124435	12	Os01g0813400|AK065370MLNEDELR0300000000
AK065370	Os01g0813400	Similar to ADP-ribosylation factor 1. (Os01t0813400-01)	20738.8	R-DAVLLVFANK-Q	000000000000	118	127	545.319	2	0.148263	0.000311777	12	Os01g0813400|AK065370DAVLLVFANK000000000000
AK065370	Os01g0813400	Similar to ADP-ribosylation factor 1. (Os01t0813400-01)	20738.8	K-QDLPNAMNAAEITDK-L	00000000000000000	128	142	815.891	2	0.237483	6.638e-11	12	Os01g0813400|AK065370QDLPNAMNAAEITDK00000000000000000
AK065370	Os01g0813400	Similar to ADP-ribosylation factor 1. (Os01t0813400-01)	20738.8	K-QDLPNAMNAAEITDK-L	00000003000000000	128	142	823.888	2	0.126683	7.78769e-09	12	Os01g0813400|AK065370QDLPNAMNAAEITDK00000003000000000
AK065370	Os01g0813400	Similar to ADP-ribosylation factor 1. (Os01t0813400-01)	20738.8	K-QDLPNAMNAAEITDK-L	20000003000000000	128	142	815.375	2	0.235184	6.66674e-05	12	Os01g0813400|AK065370QDLPNAMNAAEITDK20000003000000000
AK065370	Os01g0813400	Similar to ADP-ribosylation factor 1. (Os01t0813400-01)	20738.8	K-QDLPNAMNAAEITDKLGLHSLR-Q	000000030000000000000000	128	149	606.564	4	0.427521	5.70768e-05	12	Os01g0813400|AK065370QDLPNAMNAAEITDKLGLHSLR000000030000000000000000
AK073107	Os01g0814200	Similar to Type I inositol-1,4,5-trisphosphate 5-phosphatase CVP2 (EC 3.1.3.56) (Cotyledon vascular pattern 2 protein). (Os01t0814200-01), Hypothetical conserved gene. (Os01t0814200-02)	6810.37	M-AFTGEEKMKGCRPKLFGAK-E	100000000000000000000	2	20	737.708	3	-14.3357	0.0403488	1	Os01g0814200|AK073107AFTGEEKMKGCRPKLFGAK100000000000000000000
AK071859	Os01g0814900	Similar to Cytochrome b5 reductase. (Os01t0814900-01), Similar to Cytochrome b5 reductase. (Os01t0814900-02)	31217.1	K-VGDYMSVK-G	0000030000	131	138	457.718	2	0.0915579	0.0177544	2	Os01g0814900|AK071859VGDYMSVK0000030000
AK071859	Os01g0814900	Similar to Cytochrome b5 reductase. (Os01t0814900-01), Similar to Cytochrome b5 reductase. (Os01t0814900-02)	31217.1	R-AFGMLAGGSGITPMFQVAR-A	000030000000003000000	153	171	971.979	2	0.10329	1.07526e-05	2	Os01g0814900|AK071859AFGMLAGGSGITPMFQVAR000030000000003000000
AK100654	Os01g0816700	Similar to L-ascorbate oxidase homolog precursor (EC 1.10.3.3) (Ascorbase). (Os01t0816700-01)	62116.2	R-TFIEVVFENPEK-S	00000000000000	426	437	726.379	2	6.59759	0.00423523	1	Os01g0816700|AK100654TFIEVVFENPEK00000000000000
AK065059	Os01g0817700	Similar to 2,3-bisphosphoglycerate-independent phosphoglycerate mutase (EC 5.4.2.1) (Phosphoglyceromutase) (BPG-independent PGAM) (PGAM-I). (Os01t0817700-01), Similar to 2,3-bisphosphoglycerate-independent phosphoglycerate mutase (EC 5.4.2.1) (Phosphoglyceromutase) (BPG-independent PGAM) (PGAM-I). (Os01t0817700-02)	61036.1	K-LVDLALASGK-I	000000000000	100	109	493.798	2	0.937741	1.71859e-06	9	Os01g0817700|AK065059LVDLALASGK000000000000
AK065059	Os01g0817700	Similar to 2,3-bisphosphoglycerate-independent phosphoglycerate mutase (EC 5.4.2.1) (Phosphoglyceromutase) (BPG-independent PGAM) (PGAM-I). (Os01t0817700-01), Similar to 2,3-bisphosphoglycerate-independent phosphoglycerate mutase (EC 5.4.2.1) (Phosphoglyceromutase) (BPG-independent PGAM) (PGAM-I). (Os01t0817700-02)	61036.1	R-LDQVQLLLK-G	00000000000	143	151	535.335	2	0.453069	2.6031e-05	9	Os01g0817700|AK065059LDQVQLLLK00000000000
AK065059	Os01g0817700	Similar to 2,3-bisphosphoglycerate-independent phosphoglycerate mutase (EC 5.4.2.1) (Phosphoglyceromutase) (BPG-independent PGAM) (PGAM-I). (Os01t0817700-01), Similar to 2,3-bisphosphoglycerate-independent phosphoglycerate mutase (EC 5.4.2.1) (Phosphoglyceromutase) (BPG-independent PGAM) (PGAM-I). (Os01t0817700-02)	61036.1	R-VHILTDGR-D	0000000000	163	170	455.759	2	-0.538568	0.0317266	9	Os01g0817700|AK065059VHILTDGR0000000000
AK065059	Os01g0817700	Similar to 2,3-bisphosphoglycerate-independent phosphoglycerate mutase (EC 5.4.2.1) (Phosphoglyceromutase) (BPG-independent PGAM) (PGAM-I). (Os01t0817700-01), Similar to 2,3-bisphosphoglycerate-independent phosphoglycerate mutase (EC 5.4.2.1) (Phosphoglyceromutase) (BPG-independent PGAM) (PGAM-I). (Os01t0817700-02)	61036.1	R-GWDAQVLGEAPYK-F	000000000000000	224	236	717.359	2	2.90868	0.00387922	9	Os01g0817700|AK065059GWDAQVLGEAPYK000000000000000
AK065059	Os01g0817700	Similar to 2,3-bisphosphoglycerate-independent phosphoglycerate mutase (EC 5.4.2.1) (Phosphoglyceromutase) (BPG-independent PGAM) (PGAM-I). (Os01t0817700-01), Similar to 2,3-bisphosphoglycerate-independent phosphoglycerate mutase (EC 5.4.2.1) (Phosphoglyceromutase) (BPG-independent PGAM) (PGAM-I). (Os01t0817700-02)	61036.1	K-FQNAVEAVK-T	00000000000	237	245	503.272	2	1.15511	3.7428e-05	9	Os01g0817700|AK065059FQNAVEAVK00000000000
AK065059	Os01g0817700	Similar to 2,3-bisphosphoglycerate-independent phosphoglycerate mutase (EC 5.4.2.1) (Phosphoglyceromutase) (BPG-independent PGAM) (PGAM-I). (Os01t0817700-01), Similar to 2,3-bisphosphoglycerate-independent phosphoglycerate mutase (EC 5.4.2.1) (Phosphoglyceromutase) (BPG-independent PGAM) (PGAM-I). (Os01t0817700-02)	61036.1	K-ASDQYLPPFVIVDESGK-S	0000000000000000000	253	269	932.972	2	2.58142	0.00540036	9	Os01g0817700|AK065059ASDQYLPPFVIVDESGK0000000000000000000
AK065059	Os01g0817700	Similar to 2,3-bisphosphoglycerate-independent phosphoglycerate mutase (EC 5.4.2.1) (Phosphoglyceromutase) (BPG-independent PGAM) (PGAM-I). (Os01t0817700-01), Similar to 2,3-bisphosphoglycerate-independent phosphoglycerate mutase (EC 5.4.2.1) (Phosphoglyceromutase) (BPG-independent PGAM) (PGAM-I). (Os01t0817700-02)	61036.1	R-YAGMLQYDGELK-L	00003000000000	315	326	702.328	2	-1.78933	1.68819e-07	9	Os01g0817700|AK065059YAGMLQYDGELK00003000000000
AK065059	Os01g0817700	Similar to 2,3-bisphosphoglycerate-independent phosphoglycerate mutase (EC 5.4.2.1) (Phosphoglyceromutase) (BPG-independent PGAM) (PGAM-I). (Os01t0817700-01), Similar to 2,3-bisphosphoglycerate-independent phosphoglycerate mutase (EC 5.4.2.1) (Phosphoglyceromutase) (BPG-independent PGAM) (PGAM-I). (Os01t0817700-02)	61036.1	K-LPSHYLVSPPEIER-T	0000000000000000	327	340	818.943	2	5.51131	0.0061032	9	Os01g0817700|AK065059LPSHYLVSPPEIER0000000000000000
AK065059	Os01g0817700	Similar to 2,3-bisphosphoglycerate-independent phosphoglycerate mutase (EC 5.4.2.1) (Phosphoglyceromutase) (BPG-independent PGAM) (PGAM-I). (Os01t0817700-01), Similar to 2,3-bisphosphoglycerate-independent phosphoglycerate mutase (EC 5.4.2.1) (Phosphoglyceromutase) (BPG-independent PGAM) (PGAM-I). (Os01t0817700-02)	61036.1	R-DAILSGKFDQVR-V	00000000000000	412	423	674.864	2	-0.690219	0.000183423	9	Os01g0817700|AK065059DAILSGKFDQVR00000000000000
Os01g0819200	Os01g0819200	Similar to calcium lipid binding protein-like. (Os01t0819200-00)	50651.8	K-TLEVPIMDPSK-A	0000000300000	209	219	623.324	2	0.444475	0.00896261	2	Os01g0819200|Os01g0819200TLEVPIMDPSK0000000300000
Os01g0819200	Os01g0819200	Similar to calcium lipid binding protein-like. (Os01t0819200-00)	50651.8	K-KPVGILLVK-V	00000000000	223	231	483.84	2	1.50666	0.00125603	2	Os01g0819200|Os01g0819200KPVGILLVK00000000000
Os01g0819400	Os01g0819400	Similar to Ubiquitin carrier protein. (Os01t0819400-00)	16719.4	K-EQWSPALTISK-V	0000000000000	91	101	630.336	2	2.13592	0.00229813	1	Os01g0819400|Os01g0819400EQWSPALTISK0000000000000
AK060539	Os01g0821700	Similar to Chitin-binding lectin 1 precursor (PL-I). (Os01t0821700-01)	35642.6	K-DLSVIATEVGEEGQEYLK-L	00000000000000000000	161	178	990.495	2	1.22692	1.27164e-05	1	Os01g0821700|AK060539DLSVIATEVGEEGQEYLK00000000000000000000
AK119168	Os01g0821800	Nucleic acid-binding, OB-fold-like domain containing protein. (Os01t0821800-01), Similar to methionyl-tRNA synthetase. (Os01t0821800-02)	44283.8	M-AAAAADFAASKR-A	10000000000000	2	13	596.31	2	0.207595	0.00609973	1	Os01g0821800|AK119168AAAAADFAASKR10000000000000
AK101730	Os01g0829800	Similar to Malate dehydrogenase precursor (EC 1.1.1.37). (Os01t0829800-01), Similar to Malate dehydrogenase precursor (EC 1.1.1.37). (Os01t0829800-02)	42116.3	K-KLFGVTTLDVVR-A	00000000000000	216	227	674.403	2	-0.442693	5.39699e-06	3	Os01g0829800|AK101730KLFGVTTLDVVR00000000000000
AK101730	Os01g0829800	Similar to Malate dehydrogenase precursor (EC 1.1.1.37). (Os01t0829800-01), Similar to Malate dehydrogenase precursor (EC 1.1.1.37). (Os01t0829800-02)	42116.3	K-LFGVTTLDVVR-A	0000000000000	217	227	610.357	2	1.29056	0.00266874	3	Os01g0829800|AK101730LFGVTTLDVVR0000000000000
AK101730	Os01g0829800	Similar to Malate dehydrogenase precursor (EC 1.1.1.37). (Os01t0829800-01), Similar to Malate dehydrogenase precursor (EC 1.1.1.37). (Os01t0829800-02)	42116.3	R-IQNAGTEVVEAK-A	00000000000000	281	292	629.834	2	-1.74053	2.59158e-05	3	Os01g0829800|AK101730IQNAGTEVVEAK00000000000000
AK069755	Os01g0830100	Pyridine nucleotide-disulphide oxidoreductase, NAD-binding region domain containing protein. (Os01t0830100-01), Similar to ATNDI1/NDA1 (ALTERNATIVE NAD(P)H DEHYDROGENASE 1); NADH dehydrogenase. (Os01t0830100-02)	50259.1	R-VVVLGTGWAGSR-L	00000000000000	64	75	601.338	2	-0.449908	1.66348e-05	1	Os01g0830100|AK069755VVVLGTGWAGSR00000000000000
Z67962	Os01g0833700	Clathrin adaptor, mu subunit, C-terminal domain containing protein. (Os01t0833700-01)	57447.6	M-VVLAASIISK-S	000000000000	2	11	500.824	2	1.13185	0.0124223	1	Os01g0833700|Z67962VVLAASIISK000000000000
Z67962	Os01g0833700	Clathrin adaptor, mu subunit, C-terminal domain containing protein. (Os01t0833700-01)	57447.6	K-QYCEMESHEEK-L	2000030000000	132	142	494.851	3	-8.33368	0.0420669	1	Os01g0833700|Z67962QYCEMESHEEK2000030000000
AK064222	Os01g0835600	AT hook, DNA-binding, conserved site domain containing protein. (Os01t0835600-01), AT hook, DNA-binding, conserved site domain containing protein. (Os01t0835600-02), AT hook, DNA-binding, conserved site domain containing protein. (Os01t0835600-03), AT hook, DNA-binding, conserved site domain containing protein. (Os01t0835600-04), AT hook, DNA-binding, conserved site domain containing protein. (Os…	31604	K-LAKAERLKR-E	00000000000	260	268	542.846	2	-10.1121	0.0243506	1	Os01g0835600|AK064222LAKAERLKR00000000000
J065188E06	Os01g0835900	Histone-fold domain containing protein. (Os01t0835900-00)	11402.4	R-DNIQGITKPAIR-R	00000000000000	25	36	663.38	2	0.0233297	0.0300213	6	Os01g0835900|J065188E06DNIQGITKPAIR00000000000000
J065188E06	Os01g0835900	Histone-fold domain containing protein. (Os01t0835900-00)	11402.4	R-ISGLIYEETR-G	000000000000	47	56	590.813	2	-1.16336	1.22316e-05	6	Os01g0835900|J065188E06ISGLIYEETR000000000000
J065188E06	Os01g0835900	Histone-fold domain containing protein. (Os01t0835900-00)	11402.4	K-IFLENVIR-D	0000000000	61	68	502.299	2	-2.09514	0.00311267	6	Os01g0835900|J065188E06IFLENVIR0000000000
J065188E06	Os01g0835900	Histone-fold domain containing protein. (Os01t0835900-00)	11402.4	R-DAVTYTEHAR-R	000000000000	69	78	581.776	2	-2.99854	0.024429	6	Os01g0835900|J065188E06DAVTYTEHAR000000000000
J065188E06	Os01g0835900	Histone-fold domain containing protein. (Os01t0835900-00)	11402.4	R-KTVTAMDVVYALK-R	000000300000000	80	92	727.9	2	0.726429	0.0106381	6	Os01g0835900|J065188E06KTVTAMDVVYALK000000300000000
J065188E06	Os01g0835900	Histone-fold domain containing protein. (Os01t0835900-00)	11402.4	K-TVTAMDVVYALK-R	00000300000000	81	92	663.851	2	-2.71186	0.00605123	6	Os01g0835900|J065188E06TVTAMDVVYALK00000300000000
AB079063	Os01g0837300	Similar to UDP-glucuronic acid decarboxylase 1. (Os01t0837300-01), Similar to UDP-glucuronic acid decarboxylase 1. (Os01t0837300-02), Similar to UDP-glucuronic acid decarboxylase 1. (Os01t0837300-03)	46015.9	R-TAETLTMDYHR-G	0000000300000	249	259	677.309	2	0.773974	0.000587469	4	Os01g0837300|AB079063TAETLTMDYHR0000000300000
AB079063	Os01g0837300	Similar to UDP-glucuronic acid decarboxylase 1. (Os01t0837300-01), Similar to UDP-glucuronic acid decarboxylase 1. (Os01t0837300-02), Similar to UDP-glucuronic acid decarboxylase 1. (Os01t0837300-03)	46015.9	R-IFNTYGPR-M	0000000000	270	277	484.254	2	1.79078	0.0245725	4	Os01g0837300|AB079063IFNTYGPR0000000000
AB079063	Os01g0837300	Similar to UDP-glucuronic acid decarboxylase 1. (Os01t0837300-01), Similar to UDP-glucuronic acid decarboxylase 1. (Os01t0837300-02), Similar to UDP-glucuronic acid decarboxylase 1. (Os01t0837300-03)	46015.9	R-VVSNFVAQALR-R	0000000000000	285	295	602.344	2	-3.48636	2.40909e-05	4	Os01g0837300|AB079063VVSNFVAQALR0000000000000
AK105439	Os01g0837500	Similar to Ruvbl1 protein. (Os01t0837500-01), Similar to DNA helicase, TBP-interacting protein. (Os01t0837500-02)	49922.3	R-ALLLAGPPATGK-T	00000000000000	65	76	554.842	2	3.5909	2.89202e-05	2	Os01g0837500|AK105439ALLLAGPPATGK00000000000000
AK105439	Os01g0837500	Similar to Ruvbl1 protein. (Os01t0837500-01), Similar to DNA helicase, TBP-interacting protein. (Os01t0837500-02)	49922.3	K-SISHVIIGLK-T	000000000000	153	162	533.835	2	0.141163	0.00017442	2	Os01g0837500|AK105439SISHVIIGLK000000000000
J023112F02	Os01g0839500	Histone-fold domain containing protein. (Os01t0839500-00)	15356.5	K-QVHPDIGISSK-A	2000000000000	62	72	582.306	2	-0.431157	0.0118954	3	Os01g0839500|J023112F02QVHPDIGISSK2000000000000
J023112F02	Os01g0839500	Histone-fold domain containing protein. (Os01t0839500-00)	15356.5	K-AMSIMNSFINDIFEK-L	00300300000000000	73	87	896.419	2	0.470233	4.0755e-06	3	Os01g0839500|J023112F02AMSIMNSFINDIFEK00300300000000000
J023112F02	Os01g0839500	Histone-fold domain containing protein. (Os01t0839500-00)	15356.5	R-YNKKPTITSR-E	000000000000	98	107	604.343	2	0.2354	0.0416603	3	Os01g0839500|J023112F02YNKKPTITSR000000000000
J023112F02	Os01g0839500	Histone-fold domain containing protein. (Os01t0839500-00)	15356.5	R-LVLPGELAK-H	00000000000	115	123	470.299	2	3.81917	0.00581248	3	Os01g0839500|J023112F02LVLPGELAK00000000000
016-033-C09	Os01g0840100	Heat shock protein Hsp70 family protein. (Os01t0840100-01)	71404.2	R-VEIIANDQGNR-T	0000000000000	28	38	614.815	2	-3.6983	0.000262596	16	Os01g0840100|016-033-C09VEIIANDQGNR0000000000000
016-033-C09	Os01g0840100	Heat shock protein Hsp70 family protein. (Os01t0840100-01)	71404.2	R-TTPSYVAFTDSER-L	000000000000000	39	51	737.347	2	0.638582	1.47138e-05	16	Os01g0840100|016-033-C09TTPSYVAFTDSER000000000000000
016-033-C09	Os01g0840100	Heat shock protein Hsp70 family protein. (Os01t0840100-01)	71404.2	K-NQVAMNPINTVFDAK-R	00000300000000000	59	73	839.417	2	-0.220722	3.1187e-05	16	Os01g0840100|016-033-C09NQVAMNPINTVFDAK00000300000000000
016-033-C09	Os01g0840100	Heat shock protein Hsp70 family protein. (Os01t0840100-01)	71404.2	K-NAVVTVPAYFNDSQR-Q	00000000000000000	144	158	840.922	2	2.03817	0.00194693	16	Os01g0840100|016-033-C09NAVVTVPAYFNDSQR00000000000000000
016-033-C09	Os01g0840100	Heat shock protein Hsp70 family protein. (Os01t0840100-01)	71404.2	K-DAGVIAGLNVMR-I	00000000000300	163	174	616.328	2	1.84259	4.6927e-08	16	Os01g0840100|016-033-C09DAGVIAGLNVMR00000000000300
016-033-C09	Os01g0840100	Heat shock protein Hsp70 family protein. (Os01t0840100-01)	71404.2	K-ATAGDTHLGGEDFDNR-M	000000000000000000	226	241	838.366	2	-3.22621	3.01332e-05	16	Os01g0840100|016-033-C09ATAGDTHLGGEDFDNR000000000000000000
016-033-C09	Os01g0840100	Heat shock protein Hsp70 family protein. (Os01t0840100-01)	71404.2	K-SSVHDVVLVGGSTR-I	0000000000000000	334	347	706.88	2	2.28426	0.0467518	16	Os01g0840100|016-033-C09SSVHDVVLVGGSTR0000000000000000
016-033-C09	Os01g0840100	Heat shock protein Hsp70 family protein. (Os01t0840100-01)	71404.2	K-NKITITNDK-G	00000000000	504	512	523.798	2	4.18822	0.00765716	16	Os01g0840100|016-033-C09NKITITNDK00000000000
016-033-C09	Os01g0840100	Heat shock protein Hsp70 family protein. (Os01t0840100-01)	71404.2	K-ITITNDKGR-L	00000000000	506	514	509.288	2	0.118559	0.000103132	16	Os01g0840100|016-033-C09ITITNDKGR00000000000
016-033-C09	Os01g0840100	Heat shock protein Hsp70 family protein. (Os01t0840100-01)	71404.2	R-LSKEEIEK-M	0000000000	515	522	488.272	2	1.4787	0.0144839	16	Os01g0840100|016-033-C09LSKEEIEK0000000000
016-033-C09	Os01g0840100	Heat shock protein Hsp70 family protein. (Os01t0840100-01)	71404.2	K-NALENYAYNMR-N	0000000000300	545	555	687.811	2	3.12128	1.77892e-05	16	Os01g0840100|016-033-C09NALENYAYNMR0000000000300
016-033-C09	Os01g0840100	Heat shock protein Hsp70 family protein. (Os01t0840100-01)	71404.2	R-NTIKDDKIASK-L	0000000000000	556	566	616.847	2	1.1192	0.000201636	16	Os01g0840100|016-033-C09NTIKDDKIASK0000000000000
Os01g0843300	Os01g0843300	Similar to ATP/GTP/Ca++ binding protein. (Os01t0843300-00)	66741.4	--MALAAAPANLAGK-Q	130000000000000	1	13	628.846	2	13.5579	0.026244	1	Os01g0843300|Os01g0843300MALAAAPANLAGK130000000000000
Os01g0843300	Os01g0843300	Similar to ATP/GTP/Ca++ binding protein. (Os01t0843300-00)	66741.4	R-VVVIGDPGTGK-S	0000000000000	18	28	521.301	2	0.468114	0.0196678	1	Os01g0843300|Os01g0843300VVVIGDPGTGK0000000000000
AK122126	Os01g0847200	Similar to Mannose-1-phosphate guanyltransferase (EC 2.7.7.13) (ATP-mannose-1- phosphate guanylyltransferase) (GDP-mannose pyrophosphorylase) (NDP- hexose pyrophosphorylase). (Os01t0847200-01), Similar to Mannose-1-phosphate guanyltransferase (EC 2.7.7.13) (ATP-mannose-1- phosphate guanylyltransferase) (GDP-mannose pyrophosphorylase) (NDP- hexose pyrophosphorylase). (Os01t0847200-02)	39936.2	K-ALILVGGFGTR-L	0000000000000	3	13	552.332	2	-0.234033	0.00136876	1	Os01g0847200|AK122126ALILVGGFGTR0000000000000
AK071303	Os01g0848700	Similar to Ras-related protein Rab11C. (Os01t0848700-01)	24049.2	M-AHRVDNEYDYLFK-I	100000000000000	2	14	856.407	2	-0.786084	0.00278604	7	Os01g0848700|AK071303AHRVDNEYDYLFK100000000000000
AK071303	Os01g0848700	Similar to Ras-related protein Rab11C. (Os01t0848700-01)	24049.2	R-VDNEYDYLFK-I	000000000000	5	14	653.306	2	3.28589	0.000809096	7	Os01g0848700|AK071303VDNEYDYLFK000000000000
AK071303	Os01g0848700	Similar to Ras-related protein Rab11C. (Os01t0848700-01)	24049.2	K-IVLIGDSGVGK-S	0000000000000	15	25	529.319	2	4.45763	0.0003061	7	Os01g0848700|AK071303IVLIGDSGVGK0000000000000
AK071303	Os01g0848700	Similar to Ras-related protein Rab11C. (Os01t0848700-01)	24049.2	K-STIGVEFATR-T	000000000000	43	52	540.789	2	1.69898	9.63469e-05	7	Os01g0848700|AK071303STIGVEFATR000000000000
AK071303	Os01g0848700	Similar to Ras-related protein Rab11C. (Os01t0848700-01)	24049.2	K-AQIWDTAGQER-Y	0000000000000	63	73	637.81	2	0.082183	0.00547705	7	Os01g0848700|AK071303AQIWDTAGQER0000000000000
AK071303	Os01g0848700	Similar to Ras-related protein Rab11C. (Os01t0848700-01)	24049.2	R-AITSAYYR-G	0000000000	76	83	472.746	2	1.52505	0.00786806	7	Os01g0848700|AK071303AITSAYYR0000000000
AK071303	Os01g0848700	Similar to Ras-related protein Rab11C. (Os01t0848700-01)	24049.2	K-ALAAQESASTNGR-S	000000000000000	181	193	638.317	2	-0.791459	0.00235687	7	Os01g0848700|AK071303ALAAQESASTNGR000000000000000
AK071303	Os01g0848700	Similar to Ras-related protein Rab11C. (Os01t0848700-01)	24049.2	R-SMQGTTINVAEAPAATK-G	0030000000000000000	194	210	853.423	2	-2.39224	0.0111703	7	Os01g0848700|AK071303SMQGTTINVAEAPAATK0030000000000000000
AK102887	Os01g0850900	SOUL haem-binding protein domain containing protein. (Os01t0850900-01)	23602.2	K-GQMTMQFLLPSK-Y	00000300000000	120	131	466.232	3	-10.5435	0.01146	1	Os01g0850900|AK102887GQMTMQFLLPSK00000300000000
AK103367	Os01g0851700	Similar to Cytosolic starch phosphorylase (Fragment). (Os01t0851700-01)	94979.6	K-LVNDVGAVVNNDPDVNK-Y	0000000000000000000	629	645	891.457	2	2.34967	0.000396579	1	Os01g0851700|AK103367LVNDVGAVVNNDPDVNK0000000000000000000
AK106740	Os01g0855700	Conserved hypothetical protein. (Os01t0855700-01)	14385.4	K-QEDASEPGAAR-I	0000000000000	42	52	565.757	2	-0.95807	0.0104609	1	Os01g0855700|AK106740QEDASEPGAAR0000000000000
AK064176	Os01g0856600	Nsp1-like, C-terminal family protein. (Os01t0856600-01)	28970.3	R-LPNNSAAAER-D	000000000000	225	234	521.768	2	1.9406	0.00133478	1	Os01g0856600|AK064176LPNNSAAAER000000000000
AK063895	Os01g0856800	Similar to pleckstrin homology domain-containing protein 1. (Os01t0856800-01), Pleckstrin homology-type domain containing protein. (Os01t0856800-02)	15939.9	R-SVTDAEVVDYDSGRPAASVTADGDK--	000000000000000000000000000	118	142	842.392	3	-0.390483	0.000239804	1	Os01g0856800|AK063895SVTDAEVVDYDSGRPAASVTADGDK000000000000000000000000000
AK099121	Os01g0859200	Alpha/beta hydrolase fold-1 domain containing protein. (Os01t0859200-01), Alpha/beta hydrolase fold-1 domain containing protein. (Os01t0859200-02), Alpha/beta hydrolase fold-1 domain containing protein. (Os01t0859200-03)	39157.1	R-ELLLGEEPR-D	00000000000	337	345	528.289	2	-1.44909	0.000107947	1	Os01g0859200|AK099121ELLLGEEPR00000000000
005-008-A03	Os01g0860300	Similar to Ribosomal protein L1. (Os01t0860300-01)	10556.6	K-FPTLVTHQESLESK-V	0000000000000000	8	21	539.281	3	-2.32653	0.0155695	1	Os01g0860300|005-008-A03FPTLVTHQESLESK0000000000000000
Os01g0860950	Os01g0860950	#N/A	45314.9	K-ATSSPMGMVIDSGGKSGSGGGGGGGIR-G	00000000300000000000000000000	171	197	589.026	4	-2.09861	0.031475	1	Os01g0860950|Os01g0860950ATSSPMGMVIDSGGKSGSGGGGGGGIR00000000300000000000000000000
AK120353	Os01g0862300	Similar to Sorting nexin 1. (Os01t0862300-01)	45888.7	K-MGTGVQAYISYR-V	03000000000000	33	44	681.33	2	0.0710792	0.000111662	1	Os01g0862300|AK120353MGTGVQAYISYR03000000000000
AK071410	Os01g0865100	Similar to Uricase (Fragment). (Os01t0865100-01), Similar to Uricase. (Os01t0865100-02)	34695	M-ADRLELQGR-H	10000000000	2	10	550.295	2	-2.02429	0.00163012	2	Os01g0865100|AK071410ADRLELQGR10000000000
AK071410	Os01g0865100	Similar to Uricase (Fragment). (Os01t0865100-01), Similar to Uricase. (Os01t0865100-02)	34695	K-SGNLLINSGIQGYSLLK-T	0000000000000000000	141	157	889.001	2	5.15107	0.000237106	2	Os01g0865100|AK071410SGNLLINSGIQGYSLLK0000000000000000000
AK068991	Os01g0866100	Similar to Actin 4. (Os01t0866100-01)	23122.1	K-AGFAGDDAPR-A	000000000000	20	29	488.728	2	1.24353	1.39162e-05	8	Os01g0866100|AK068991AGFAGDDAPR000000000000
AK068991	Os01g0866100	Similar to Actin 4. (Os01t0866100-01)	23122.1	R-AVFPSIVGRPR-H	0000000000000	30	40	599.857	2	1.81488	0.00127724	8	Os01g0866100|AK068991AVFPSIVGRPR0000000000000
AK068991	Os01g0866100	Similar to Actin 4. (Os01t0866100-01)	23122.1	R-HTGVMVGMGQK-D	0000030030000	41	51	588.779	2	0.888456	0.0200177	8	Os01g0866100|AK068991HTGVMVGMGQK0000030030000
AK068991	Os01g0866100	Similar to Actin 4. (Os01t0866100-01)	23122.1	K-DAYVGDEAQSK-R	0000000000000	52	62	591.767	2	-0.140863	2.75212e-06	8	Os01g0866100|AK068991DAYVGDEAQSK0000000000000
AK068991	Os01g0866100	Similar to Actin 4. (Os01t0866100-01)	23122.1	K-DAYVGDEAQSKR-G	00000000000000	52	63	669.817	2	-1.14188	0.00573991	8	Os01g0866100|AK068991DAYVGDEAQSKR00000000000000
AK111757	Os01g0866500	Similar to Soluble inorganic pyrophosphatase (EC 3.6.1.1) (Pyrophosphate phospho- hydrolase) (PPase). (Os01t0866500-01)	24236.2	R-VLYSSVVYPHNYGFIPR-T	0000000000000000000	78	94	671.02	3	1.21076	0.000177554	2	Os01g0866500|AK111757VLYSSVVYPHNYGFIPR0000000000000000000
AK111757	Os01g0866500	Similar to Soluble inorganic pyrophosphatase (EC 3.6.1.1) (Pyrophosphate phospho- hydrolase) (PPase). (Os01t0866500-01)	24236.2	R-FFEDYKK-N	000000000	169	175	488.741	2	-2.22665	0.0396753	2	Os01g0866500|AK111757FFEDYKK000000000
AK099337	Os01g0866700	Similar to Sm-like protein. (Os01t0866700-01)	11669.2	R-GDGVILVSPPLR-T	00000000000000	91	102	611.862	2	1.17317	0.0103815	2	Os01g0866700|AK099337GDGVILVSPPLR00000000000000
AK058284	Os01g0869800	Similar to Photosystem II subunit PsbS. (Os01t0869800-01)	27886	K-FKTEDGIFGTSGGIGFTK-E	00000000000000000000	73	90	621.315	3	-0.626684	0.00120419	7	Os01g0869800|AK058284FKTEDGIFGTSGGIGFTK00000000000000000000
AK058284	Os01g0869800	Similar to Photosystem II subunit PsbS. (Os01t0869800-01)	27886	K-TEDGIFGTSGGIGFTK-E	000000000000000000	75	90	793.886	2	-3.22559	1.27142e-05	7	Os01g0869800|AK058284TEDGIFGTSGGIGFTK000000000000000000
AK058284	Os01g0869800	Similar to Photosystem II subunit PsbS. (Os01t0869800-01)	27886	K-ENELFVGR-V	0000000000	91	98	482.249	2	1.09259	0.0107406	7	Os01g0869800|AK058284ENELFVGR0000000000
AK058284	Os01g0869800	Similar to Photosystem II subunit PsbS. (Os01t0869800-01)	27886	R-VAMLGFAASILGEAITGK-G	00030000000000000000	99	116	882.983	2	1.7568	0.0190371	7	Os01g0869800|AK058284VAMLGFAASILGEAITGK00030000000000000000
AK058284	Os01g0869800	Similar to Photosystem II subunit PsbS. (Os01t0869800-01)	27886	R-GSFVDDQPVTGLDK-A	0000000000000000	156	169	739.363	2	0.916433	1.03487e-06	7	Os01g0869800|AK058284GSFVDDQPVTGLDK0000000000000000
AK058284	Os01g0869800	Similar to Photosystem II subunit PsbS. (Os01t0869800-01)	27886	R-SALGLSEGGPLFGFTK-A	000000000000000000	180	195	790.92	2	1.11942	3.9322e-07	7	Os01g0869800|AK058284SALGLSEGGPLFGFTK000000000000000000
AK068840	Os01g0871500	TGF-beta receptor, type I/II extracellular region family protein. (Os01t0871500-01)	59592.4	M-ASHAVTDALLLPR-S	100000000000000	2	14	703.392	2	-1.86187	8.14825e-06	1	Os01g0871500|AK068840ASHAVTDALLLPR100000000000000
AK068840	Os01g0871500	TGF-beta receptor, type I/II extracellular region family protein. (Os01t0871500-01)	59592.4	R-YYVSTQSSPFAR-L	00000000000000	253	264	703.341	2	0.407468	0.0487822	1	Os01g0871500|AK068840YYVSTQSSPFAR00000000000000
AK065101	Os01g0876400	Sad1/UNC-like, C-terminal domain containing protein. (Os01t0876400-01), Hypothetical conserved gene. (Os01t0876400-02), Hypothetical conserved gene. (Os01t0876400-03), Hypothetical conserved gene. (Os01t0876400-04)	69164.1	K-GASNILDKDK-D	000000000000	232	241	530.786	2	1.36613	0.0438583	1	Os01g0876400|AK065101GASNILDKDK000000000000
AK067960	Os01g0881300	Non-protein coding transcript. (Os01t0881300-01), MtN3 and saliva related transmembrane protein family protein. (Os01t0881300-02)	29838.7	K-GDAADEVEDAKK-A	00000000000000	225	236	624.291	2	0.403807	0.0409126	2	Os01g0881300|AK067960GDAADEVEDAKK00000000000000
AK067960	Os01g0881300	Non-protein coding transcript. (Os01t0881300-01), MtN3 and saliva related transmembrane protein family protein. (Os01t0881300-02)	29838.7	K-AAAAVEMADAK-T	0000000300000	237	247	532.257	2	-2.02338	5.22307e-07	2	Os01g0881300|AK067960AAAAVEMADAK0000000300000
AK067960	Os01g0881300	Non-protein coding transcript. (Os01t0881300-01), MtN3 and saliva related transmembrane protein family protein. (Os01t0881300-02)	29838.7	K-VVADDADADADGKSADDKVASQV--	0000000000000000000000000	251	273	754.683	3	-0.423012	0.0162715	2	Os01g0881300|AK067960VVADDADADADGKSADDKVASQV0000000000000000000000000
AK110782	Os01g0881700	0	12137.6	K-EKGGYEISIVDASDGR-Q	000000000000000000	11	26	565.944	3	0.249874	0.0214917	1	Os01g0881700|AK110782EKGGYEISIVDASDGR000000000000000000
AK108013	Os01g0888200	Conserved hypothetical protein. (Os01t0888200-01)	5024.37	R-VVCGGGGGENGGGEDGAR-E	00000000000000000000	11	28	540.23	3	-7.31902	0.00557113	1	Os01g0888200|AK108013VVCGGGGGENGGGEDGAR00000000000000000000
AK066619	Os01g0889200	RNA polymerase III Rpc4 domain containing protein. (Os01t0889200-01)	22562.2	R-MLLFQLPK-S	0300000000	84	91	503.29	2	-7.15152	0.0476038	1	Os01g0889200|AK066619MLLFQLPK0300000000
AK063674	Os01g0891300	Similar to Allyl alcohol dehydrogenase. (Os01t0891300-01), Similar to Allyl alcohol dehydrogenase. (Os01t0891300-02)	39604.1	R-VPEAAAPAPAVLVK-N	0000000000000000	43	56	666.898	2	0.705937	0.000695484	1	Os01g0891300|AK063674VPEAAAPAPAVLVK0000000000000000
AK060500	Os01g0894300	Similar to Fructokinase 1. (Os01t0894300-01), Fructokinase (Fragment). (Os01t0894300-02)	34911.1	K-APGGAPANVAIAVAR-L	00000000000000000	36	50	667.881	2	-0.0485881	1.16373e-09	5	Os01g0894300|AK060500APGGAPANVAIAVAR00000000000000000
AK060500	Os01g0894300	Similar to Fructokinase 1. (Os01t0894300-01), Fructokinase (Fragment). (Os01t0894300-02)	34911.1	K-LGDDEFGR-M	0000000000	61	68	454.709	2	0.969899	0.00025308	5	Os01g0894300|AK060500LGDDEFGR0000000000
AK060500	Os01g0894300	Similar to Fructokinase 1. (Os01t0894300-01), Fructokinase (Fragment). (Os01t0894300-02)	34911.1	R-TALAFVTLR-A	00000000000	92	100	496.301	2	0.619334	0.000372469	5	Os01g0894300|AK060500TALAFVTLR00000000000
AK060500	Os01g0894300	Similar to Fructokinase 1. (Os01t0894300-01), Fructokinase (Fragment). (Os01t0894300-02)	34911.1	K-EAGALLSYDPNLR-E	000000000000000	160	172	709.869	2	2.79936	0.022468	5	Os01g0894300|AK060500EAGALLSYDPNLR000000000000000
AK060500	Os01g0894300	Similar to Fructokinase 1. (Os01t0894300-01), Fructokinase (Fragment). (Os01t0894300-02)	34911.1	K-VQQVDTTGAGDAFVGALLR-R	000000000000000000000	253	271	959.508	2	2.89792	0.00106884	5	Os01g0894300|AK060500VQQVDTTGAGDAFVGALLR000000000000000000000
AK104693	Os01g0896800	Ribosomal protein L5, eukaryotic domain containing protein. (Os01t0896800-01)	34778.8	R-ALLDVGLIR-T	00000000000	144	152	485.308	2	-0.333117	9.45852e-07	2	Os01g0896800|AK104693ALLDVGLIR00000000000
AK104693	Os01g0896800	Ribosomal protein L5, eukaryotic domain containing protein. (Os01t0896800-01)	34778.8	K-GIDADGMEALYK-K	00000003000000	230	241	649.8	2	-0.530879	0.0461734	2	Os01g0896800|AK104693GIDADGMEALYK00000003000000
AK072812	Os01g0897800	Rad21/Rec8 like protein, C-terminal domain containing protein. (Os01t0897800-01), Similar to Rad21/Rec8-like protein. (Os01t0897800-02), Rad21/Rec8 like protein, C-terminal domain containing protein. (Os01t0897800-03), Similar to Rad21/Rec8-like protein. (Os01t0897800-04)	115946	K-ASPSSNDETAK-T	0000000000000	325	335	553.751	2	-1.29426	0.0151832	1	Os01g0897800|AK072812ASPSSNDETAK0000000000000
AK121843	Os01g0899000	Similar to Pti1 kinase-like protein. (Os01t0899000-01)	40919	R-GQQSLVTWATPR-L	00000000000000	288	299	672.354	2	-4.65426	0.000312977	1	Os01g0899000|AK121843GQQSLVTWATPR00000000000000
AK073770	Os01g0905800	Aldolase C-1. (Os01t0905800-01), Aldolase C-1. (Os01t0905800-02), Aldolase C-1. (Os01t0905800-03)	39225.4	K-YKDELIK-N	000000000	8	14	454.758	2	-0.879838	0.0428712	19	Os01g0905800|AK073770YKDELIK000000000
AK073770	Os01g0905800	Aldolase C-1. (Os01t0905800-01), Aldolase C-1. (Os01t0905800-02), Aldolase C-1. (Os01t0905800-03)	39225.4	K-NAAYIGTPGK-G	000000000000	15	24	496.264	2	0.522852	7.91011e-07	19	Os01g0905800|AK073770NAAYIGTPGK000000000000
AK073770	Os01g0905800	Aldolase C-1. (Os01t0905800-01), Aldolase C-1. (Os01t0905800-02), Aldolase C-1. (Os01t0905800-03)	39225.4	K-GILAADESTGTIGK-R	0000000000000000	25	38	666.854	2	0.789833	4.74668e-05	19	Os01g0905800|AK073770GILAADESTGTIGK0000000000000000
AK073770	Os01g0905800	Aldolase C-1. (Os01t0905800-01), Aldolase C-1. (Os01t0905800-02), Aldolase C-1. (Os01t0905800-03)	39225.4	R-FASINVENVEENR-R	000000000000000	40	52	760.871	2	0.80984	1.76148e-07	19	Os01g0905800|AK073770FASINVENVEENR000000000000000
AK073770	Os01g0905800	Aldolase C-1. (Os01t0905800-01), Aldolase C-1. (Os01t0905800-02), Aldolase C-1. (Os01t0905800-03)	39225.4	R-FASINVENVEENRR-S	0000000000000000	40	53	559.617	3	1.50011	3.74477e-05	19	Os01g0905800|AK073770FASINVENVEENRR0000000000000000
AK073770	Os01g0905800	Aldolase C-1. (Os01t0905800-01), Aldolase C-1. (Os01t0905800-02), Aldolase C-1. (Os01t0905800-03)	39225.4	K-DGKPFVDVLK-E	000000000000	85	94	559.317	2	1.0601	0.0136433	19	Os01g0905800|AK073770DGKPFVDVLK000000000000
AK073770	Os01g0905800	Aldolase C-1. (Os01t0905800-01), Aldolase C-1. (Os01t0905800-02), Aldolase C-1. (Os01t0905800-03)	39225.4	K-VDKGTVEVAGTNK-E	000000000000000	104	116	659.355	2	1.00248	8.96105e-07	19	Os01g0905800|AK073770VDKGTVEVAGTNK000000000000000
AK073770	Os01g0905800	Aldolase C-1. (Os01t0905800-01), Aldolase C-1. (Os01t0905800-02), Aldolase C-1. (Os01t0905800-03)	39225.4	K-GTVEVAGTNK-E	000000000000	107	116	488.258	2	-0.892152	0.00799168	19	Os01g0905800|AK073770GTVEVAGTNK000000000000
AK073770	Os01g0905800	Aldolase C-1. (Os01t0905800-01), Aldolase C-1. (Os01t0905800-02), Aldolase C-1. (Os01t0905800-03)	39225.4	K-ETTTQGHDDLGKR-C	000000000000000	117	129	729.352	2	-0.831782	0.00530449	19	Os01g0905800|AK073770ETTTQGHDDLGKR000000000000000
AK073770	Os01g0905800	Aldolase C-1. (Os01t0905800-01), Aldolase C-1. (Os01t0905800-02), Aldolase C-1. (Os01t0905800-03)	39225.4	K-IGPNEPSQLSIDLNAQGLAR-Y	0000000000000000000000	149	168	1047.05	2	-5.28598	1.29328e-10	19	Os01g0905800|AK073770IGPNEPSQLSIDLNAQGLAR0000000000000000000000
AK073770	Os01g0905800	Aldolase C-1. (Os01t0905800-01), Aldolase C-1. (Os01t0905800-02), Aldolase C-1. (Os01t0905800-03)	39225.4	K-ALNEHHVLLEGSLLKPNMVTPGSESK-K	0000000000000000003000000000	211	236	704.874	4	4.66792	0.0217677	19	Os01g0905800|AK073770ALNEHHVLLEGSLLKPNMVTPGSESK0000000000000000003000000000
AK073770	Os01g0905800	Aldolase C-1. (Os01t0905800-01), Aldolase C-1. (Os01t0905800-02), Aldolase C-1. (Os01t0905800-03)	39225.4	K-KVSPQLIAEYTVR-A	000000000000000	237	249	752.43	2	-0.709415	5.92439e-06	19	Os01g0905800|AK073770KVSPQLIAEYTVR000000000000000
AK073770	Os01g0905800	Aldolase C-1. (Os01t0905800-01), Aldolase C-1. (Os01t0905800-02), Aldolase C-1. (Os01t0905800-03)	39225.4	K-VSPQLIAEYTVR-A	00000000000000	238	249	688.384	2	2.03513	1.4933e-06	19	Os01g0905800|AK073770VSPQLIAEYTVR00000000000000
AK073770	Os01g0905800	Aldolase C-1. (Os01t0905800-01), Aldolase C-1. (Os01t0905800-02), Aldolase C-1. (Os01t0905800-03)	39225.4	K-AWGGKTENVVK-A	0000000000000	307	317	594.822	2	-1.04057	0.000762459	19	Os01g0905800|AK073770AWGGKTENVVK0000000000000
AK073770	Os01g0905800	Aldolase C-1. (Os01t0905800-01), Aldolase C-1. (Os01t0905800-02), Aldolase C-1. (Os01t0905800-03)	39225.4	K-ANSEATLGTYQGDAVLGEGASESLHVK-D	00000000000000000000000000000	328	354	902.103	3	-3.90871	0.0351469	19	Os01g0905800|AK073770ANSEATLGTYQGDAVLGEGASESLHVK00000000000000000000000000000
AK062957	Os01g0908400	Conserved hypothetical protein. (Os01t0908400-01), Conserved hypothetical protein. (Os01t0908400-02)	7348.6	R-MQAELMAQAK-E	030000300000	48	57	576.774	2	0.865379	3.92132e-05	1	Os01g0908400|AK062957MQAELMAQAK030000300000
AK101333	Os01g0911200	Ribophorin II family protein. (Os01t0911200-01)	75373	K-SYDDGTFYFDEK-H	00000000000000	231	242	743.806	2	2.21196	0.000553581	10	Os01g0911200|AK101333SYDDGTFYFDEK00000000000000
AK101333	Os01g0911200	Ribophorin II family protein. (Os01t0911200-01)	75373	K-HVDAAEYK-G	0000000000	243	250	466.727	2	0.322832	0.00897462	10	Os01g0911200|AK101333HVDAAEYK0000000000
AK101333	Os01g0911200	Ribophorin II family protein. (Os01t0911200-01)	75373	K-HVDAAEYKGPITTSASVVR-G	000000000000000000000	243	261	667.685	3	0.773648	0.0457572	10	Os01g0911200|AK101333HVDAAEYKGPITTSASVVR000000000000000000000
AK101333	Os01g0911200	Ribophorin II family protein. (Os01t0911200-01)	75373	K-GPITTSASVVR-G	0000000000000	251	261	544.308	2	-2.53523	0.00181728	10	Os01g0911200|AK101333GPITTSASVVR0000000000000
AK101333	Os01g0911200	Ribophorin II family protein. (Os01t0911200-01)	75373	R-GVTSFAAVASGK-L	00000000000000	262	273	547.796	2	0.861874	3.5036e-05	10	Os01g0911200|AK101333GVTSFAAVASGK00000000000000
AK101333	Os01g0911200	Ribophorin II family protein. (Os01t0911200-01)	75373	R-VFVPLVLSLPSK-V	00000000000000	315	326	649.909	2	1.524	0.000205031	10	Os01g0911200|AK101333VFVPLVLSLPSK00000000000000
AK101333	Os01g0911200	Ribophorin II family protein. (Os01t0911200-01)	75373	R-VNLVQVLGSDSK-V	00000000000000	353	364	629.852	2	-2.63371	5.45734e-10	10	Os01g0911200|AK101333VNLVQVLGSDSK00000000000000
AK101333	Os01g0911200	Ribophorin II family protein. (Os01t0911200-01)	75373	K-AEIGISDNDAGTVESVQK-I	00000000000000000000	434	451	916.951	2	4.07643	0.00120934	10	Os01g0911200|AK101333AEIGISDNDAGTVESVQK00000000000000000000
AK101333	Os01g0911200	Ribophorin II family protein. (Os01t0911200-01)	75373	K-DTSVSLSANHLQK-L	000000000000000	457	469	700.36	2	-3.91307	4.7626e-05	10	Os01g0911200|AK101333DTSVSLSANHLQK000000000000000
AK101333	Os01g0911200	Ribophorin II family protein. (Os01t0911200-01)	75373	R-LSFQLSTPLGK-T	0000000000000	472	482	595.842	2	-1.57661	0.000812159	10	Os01g0911200|AK101333LSFQLSTPLGK0000000000000
AK101333	Os01g0911200	Ribophorin II family protein. (Os01t0911200-01)	75373	K-APKPPAQAVDPFSK-F	0000000000000000	566	579	484.935	3	3.60811	0.00381229	10	Os01g0911200|AK101333APKPPAQAVDPFSK0000000000000000
AK071735	Os01g0913600	Similar to Rho GDP-dissociation inhibitor 1 (Rho GDI-1) (AtRhoGDI1). (Os01t0913600-01)	24888.3	R-NPDVNDVEEEEEDEEGNKR-A	000000000000000000000	18	36	749.315	3	-1.47625	1.90521e-05	3	Os01g0913600|AK071735NPDVNDVEEEEEDEEGNKR000000000000000000000
AK071735	Os01g0913600	Similar to Rho GDP-dissociation inhibitor 1 (Rho GDI-1) (AtRhoGDI1). (Os01t0913600-01)	24888.3	R-FSFIVSNNIVSGLK-Y	0000000000000000	125	138	762.925	2	0.988306	0.03456	3	Os01g0913600|AK071735FSFIVSNNIVSGLK0000000000000000
J100024O13	Os01g0915900	Conserved hypothetical protein. (Os01t0915900-01)	28327.9	M-SSWNSPYYDTSSYGAGSGGGGGGGR-R	000000000000000000000000000	2	26	795.321	3	-13.2809	0.000148978	2	Os01g0915900|J100024O13SSWNSPYYDTSSYGAGSGGGGGGGR000000000000000000000000000
AK059446	Os01g0916600	RNA recognition motif, glycine rich protein domain containing protein. (Os01t0916600-01)	15537.3	R-VNFANERPPGNR-G	00000000000000	110	121	457.569	3	-0.190444	0.000543485	1	Os01g0916600|AK059446VNFANERPPGNR00000000000000
Os01g0916800	Os01g0916800	Similar to predicted protein. (Os01t0916800-00)	192553	R-DVSSSKVDDR-D	000000000000	1575	1584	554.261	2	-11.4521	0.0183668	1	Os01g0916800|Os01g0916800DVSSSKVDDR000000000000
AK062434	Os01g0918200	Similar to Ubiquitin-like protein SMT3. (Os01t0918200-01), Similar to Ubiquitin-like protein SMT3. (Os01t0918200-02)	11072.4	M-SSPAGEDEKKPAGGEGGGAHINLK-V	10000000000000000000000000	2	25	783.388	3	0.378635	2.94557e-06	3	Os01g0918200|AK062434SSPAGEDEKKPAGGEGGGAHINLK10000000000000000000000000
AK062434	Os01g0918200	Similar to Ubiquitin-like protein SMT3. (Os01t0918200-01), Similar to Ubiquitin-like protein SMT3. (Os01t0918200-02)	11072.4	K-GQDGNEVFFR-I	000000000000	28	37	584.773	2	0.588104	9.03846e-06	3	Os01g0918200|AK062434GQDGNEVFFR000000000000
AK062434	Os01g0918200	Similar to Ubiquitin-like protein SMT3. (Os01t0918200-01), Similar to Ubiquitin-like protein SMT3. (Os01t0918200-02)	11072.4	K-SIAFLFDGR-R	00000000000	61	69	513.274	2	0.0855561	0.00165337	3	Os01g0918200|AK062434SIAFLFDGR00000000000
AK058869	Os01g0918300	Ubiquitin-like protein SMT3. (Os01t0918300-01), Similar to Ubiquitin-like protein SMT3. (Os01t0918300-02)	11063.4	M-SAAGEEDKKPAGGEGGGAHINLK-V	1000000000000000000000000	2	24	745.704	3	-1.64945	3.58875e-05	2	Os01g0918300|AK058869SAAGEEDKKPAGGEGGGAHINLK1000000000000000000000000
AK058869	Os01g0918300	Ubiquitin-like protein SMT3. (Os01t0918300-01), Similar to Ubiquitin-like protein SMT3. (Os01t0918300-02)	11063.4	K-GQDGNEVFFR-I	000000000000	27	36	584.773	2	0.588104	9.03846e-06	2	Os01g0918300|AK058869GQDGNEVFFR000000000000
AK100437	Os01g0919200	Bacterial transferase hexapeptide repeat domain containing protein. (Os01t0919200-01)	27267.3	R-AGVGAGVGAGVGAK-V	0000000000000000	81	94	535.801	2	-0.484344	1.11463e-05	6	Os01g0919200|AK100437AGVGAGVGAGVGAK0000000000000000
AK100437	Os01g0919200	Bacterial transferase hexapeptide repeat domain containing protein. (Os01t0919200-01)	27267.3	R-AGVGANVGAGVGAK-V	0000000000000000	113	126	564.313	2	1.40274	2.59494e-07	6	Os01g0919200|AK100437AGVGANVGAGVGAK0000000000000000
AK100437	Os01g0919200	Bacterial transferase hexapeptide repeat domain containing protein. (Os01t0919200-01)	27267.3	K-VGAGVGVGAGAGVGAK-V	000000000000000000	127	142	613.846	2	-0.65788	1.21644e-06	6	Os01g0919200|AK100437VGAGVGVGAGAGVGAK000000000000000000
AF378184	Os01g0919400	Similar to Sucrose-phosphate synthase (EC 2.4.1.14) (UDP-glucose-fructose- phosphate glucosyltransferase). (Os01t0919400-00)	11829.2	K-QLELEGILR-I	00000000000	19	27	535.812	2	-3.4099	0.000136184	1	Os01g0919400|AF378184QLELEGILR00000000000
AK069967	Os01g0920000	Cystathionine beta-synthase, core domain containing protein. (Os01t0920000-01), Cystathionine beta-synthase, core domain containing protein. (Os01t0920000-02)	41335.1	R-AMAAVVGEVVQPNPGLLR-E	00300000000000000000	64	81	919.001	2	-3.24127	0.000221553	1	Os01g0920000|AK069967AMAAVVGEVVQPNPGLLR00300000000000000000
AK073965	Os01g0920400	Similar to Dynamin-related protein 3A (Dynamin-like protein 2) (Dynamin-like protein 2a). Splice isoform 2. (Os01t0920400-01), Hypothetical conserved gene. (Os01t0920400-02)	90545.8	R-MAIQNATGPR-S	030000000000	416	425	537.772	2	1.04402	0.00839226	1	Os01g0920400|AK073965MAIQNATGPR030000000000
Os01g0921200	Os01g0921200	Similar to predicted protein. (Os01t0921200-01)	109820	R-AAAAAAAAAAAAAR-R	0000000000000000	30	43	549.804	2	-0.216045	1.13525e-05	2	Os01g0921200|Os01g0921200AAAAAAAAAAAAAR0000000000000000
Os01g0921200	Os01g0921200	Similar to predicted protein. (Os01t0921200-01)	109820	K-TLTSGLDDYPR-A	0000000000000	617	627	619.307	2	1.05994	0.010035	2	Os01g0921200|Os01g0921200TLTSGLDDYPR0000000000000
AK071344	Os01g0921600	Similar to Mitochondrial import receptor subunit TOM20 (Translocase of outer membrane 20 kDa subunit). (Os01t0921600-01)	22873.1	K-VTYEQNPHDADNLTR-W	00000000000000000	24	38	591.612	3	1.12551	0.00109326	5	Os01g0921600|AK071344VTYEQNPHDADNLTR00000000000000000
AK071344	Os01g0921600	Similar to Mitochondrial import receptor subunit TOM20 (Translocase of outer membrane 20 kDa subunit). (Os01t0921600-01)	22873.1	R-WGGALLELSQMR-N	00000000000300	39	50	688.855	2	1.98953	2.16e-05	5	Os01g0921600|AK071344WGGALLELSQMR00000000000300
AK071344	Os01g0921600	Similar to Mitochondrial import receptor subunit TOM20 (Translocase of outer membrane 20 kDa subunit). (Os01t0921600-01)	22873.1	K-AVDVEPANDLYR-K	00000000000000	114	125	681.339	2	0.755481	0.00134851	5	Os01g0921600|AK071344AVDVEPANDLYR00000000000000
AK071344	Os01g0921600	Similar to Mitochondrial import receptor subunit TOM20 (Translocase of outer membrane 20 kDa subunit). (Os01t0921600-01)	22873.1	R-QMASQASQAASSTSNTR-Q	0030000000000000000	144	160	871.394	2	2.14293	1.39918e-06	5	Os01g0921600|AK071344QMASQASQAASSTSNTR0030000000000000000
AK071344	Os01g0921600	Similar to Mitochondrial import receptor subunit TOM20 (Translocase of outer membrane 20 kDa subunit). (Os01t0921600-01)	22873.1	K-SNAPPQAPR--	00000000000	194	202	469.247	2	1.55341	0.00385067	5	Os01g0921600|AK071344SNAPPQAPR00000000000
AK109471	Os01g0925200	Similar to Enoyl CoA hydratase-like protein. (Os01t0925200-01)	30983.2	R-IVGYGNAADLALTGR-K	00000000000000000	182	196	745.902	2	0.434457	1.04821e-06	1	Os01g0925200|AK109471IVGYGNAADLALTGR00000000000000000
AK067632	Os01g0926300	Similar to Transaldolase (EC 2.2.1.2). (Os01t0926300-01), Similar to Transaldolase (EC 2.2.1.2). (Os01t0926300-02), Similar to Transaldolase (EC 2.2.1.2). (Os01t0926300-03)	46615.4	K-AISTSNAYDDQFK-Q	000000000000000	114	126	730.342	2	5.02769	3.35744e-05	4	Os01g0926300|AK067632AISTSNAYDDQFK000000000000000
AK067632	Os01g0926300	Similar to Transaldolase (EC 2.2.1.2). (Os01t0926300-01), Similar to Transaldolase (EC 2.2.1.2). (Os01t0926300-02), Similar to Transaldolase (EC 2.2.1.2). (Os01t0926300-03)	46615.4	R-LANDTQGTVEAAK-W	000000000000000	176	188	659.332	2	-5.63952	0.00513742	4	Os01g0926300|AK067632LANDTQGTVEAAK000000000000000
AK067632	Os01g0926300	Similar to Transaldolase (EC 2.2.1.2). (Os01t0926300-01), Similar to Transaldolase (EC 2.2.1.2). (Os01t0926300-02), Similar to Transaldolase (EC 2.2.1.2). (Os01t0926300-03)	46615.4	R-VTSVASFFVSR-V	0000000000000	256	266	600.325	2	0.0864746	3.10976e-06	4	Os01g0926300|AK067632VTSVASFFVSR0000000000000
AK067632	Os01g0926300	Similar to Transaldolase (EC 2.2.1.2). (Os01t0926300-01), Similar to Transaldolase (EC 2.2.1.2). (Os01t0926300-02), Similar to Transaldolase (EC 2.2.1.2). (Os01t0926300-03)	46615.4	K-IGTPEALALR-G	000000000000	278	287	520.809	2	1.35871	0.00549303	4	Os01g0926300|AK067632IGTPEALALR000000000000
AF309383	Os01g0933900	Similar to Glutathione transferase III(B) (EC 2.5.1.18). (Os01t0933900-01)	24067.6	R-VYGMALSANVVR-V	00003000000000	10	21	648.343	2	1.43143	0.000251876	1	Os01g0933900|AF309383VYGMALSANVVR00003000000000
AK070575	Os01g0935500	Similar to Potassium transporter 7 (OsHAK7). (Os01t0935500-01), Similar to Potassium transporter HAK4. (Os01t0935500-02)	89016.9	R-MAVITTSDDYDSPLAVR-D	0300000000000000000	642	658	935.454	2	5.31202	1.63673e-05	2	Os01g0935500|AK070575MAVITTSDDYDSPLAVR0300000000000000000
AK070575	Os01g0935500	Similar to Potassium transporter 7 (OsHAK7). (Os01t0935500-01), Similar to Potassium transporter HAK4. (Os01t0935500-02)	89016.9	R-DSNDLADSMTMR-S	00000000030300	659	670	694.276	2	-0.597597	0.0183807	2	Os01g0935500|AK070575DSNDLADSMTMR00000000030300
AK070575	Os01g0935500	Similar to Potassium transporter 7 (OsHAK7). (Os01t0935500-01), Similar to Potassium transporter HAK4. (Os01t0935500-02)	89016.9	R-SLQSSYEQESPNVSR-R	00000000000000000	679	693	855.901	2	0.489551	2.592e-06	2	Os01g0935500|AK070575SLQSSYEQESPNVSR00000000000000000
AK069403	Os01g0935700	Similar to Cytochrome c1, heme protein. (Os01t0935700-01), Similar to Cytochrome c1 (Fragment). (Os01t0935700-02)	33389.7	R-DLVGVAYTEEETK-A	000000000000000	113	125	727.357	2	1.13473	2.40452e-10	9	Os01g0935700|AK069403DLVGVAYTEEETK000000000000000
AK069403	Os01g0935700	Similar to Cytochrome c1, heme protein. (Os01t0935700-01), Similar to Cytochrome c1 (Fragment). (Os01t0935700-02)	33389.7	K-AMAAEIEVVDGPNDEGEMFTRPGK-L	00300000000000000030000000	126	149	865.728	3	-0.448041	2.55422e-08	9	Os01g0935700|AK069403AMAAEIEVVDGPNDEGEMFTRPGK00300000000000000030000000
AK069403	Os01g0935700	Similar to Cytochrome c1, heme protein. (Os01t0935700-01), Similar to Cytochrome c1 (Fragment). (Os01t0935700-02)	33389.7	K-LSDRFPQPYANEQAAR-F	000000000000000000	150	165	621.643	3	0.646697	0.00736735	9	Os01g0935700|AK069403LSDRFPQPYANEQAAR000000000000000000
AK069403	Os01g0935700	Similar to Cytochrome c1, heme protein. (Os01t0935700-01), Similar to Cytochrome c1 (Fragment). (Os01t0935700-02)	33389.7	R-HNGQNYVFALLTGYR-D	00000000000000000	184	198	584.968	3	4.38471	0.0211681	9	Os01g0935700|AK069403HNGQNYVFALLTGYR00000000000000000
AK069403	Os01g0935700	Similar to Cytochrome c1, heme protein. (Os01t0935700-01), Similar to Cytochrome c1 (Fragment). (Os01t0935700-02)	33389.7	R-EGLHYNPYFPGGAIAMPK-M	00000000000000003000	208	225	659.991	3	2.84015	0.0025953	9	Os01g0935700|AK069403EGLHYNPYFPGGAIAMPK00000000000000003000
AK069403	Os01g0935700	Similar to Cytochrome c1, heme protein. (Os01t0935700-01), Similar to Cytochrome c1 (Fragment). (Os01t0935700-02)	33389.7	K-MLIDGAVEYEDGTPATEAQMGK-D	030000000000000000003000	226	247	1179.53	2	-0.370595	8.17721e-10	9	Os01g0935700|AK069403MLIDGAVEYEDGTPATEAQMGK030000000000000000003000
AK069403	Os01g0935700	Similar to Cytochrome c1, heme protein. (Os01t0935700-01), Similar to Cytochrome c1 (Fragment). (Os01t0935700-02)	33389.7	K-MLIDGAVEYEDGTPATEAQMGK-D	000000000000000000003000	226	247	1171.53	2	1.93767	0.000199207	9	Os01g0935700|AK069403MLIDGAVEYEDGTPATEAQMGK000000000000000000003000
AK069403	Os01g0935700	Similar to Cytochrome c1, heme protein. (Os01t0935700-01), Similar to Cytochrome c1 (Fragment). (Os01t0935700-02)	33389.7	R-KLVLDVVN--	0000000000	297	304	450.282	2	1.66301	0.0263829	9	Os01g0935700|AK069403KLVLDVVN0000000000
AK069146	Os01g0935900	Conserved hypothetical protein. (Os01t0935900-01), Similar to Succinate dehydrogenase subunit 4. (Os01t0935900-02)	23115.4	R-KGPLTSESWK-V	000000000000	120	129	566.803	2	-0.1224	0.00029028	3	Os01g0935900|AK069146KGPLTSESWK000000000000
AK069146	Os01g0935900	Conserved hypothetical protein. (Os01t0935900-01), Similar to Succinate dehydrogenase subunit 4. (Os01t0935900-02)	23115.4	K-VKQTELLTR-S	00000000000	130	138	544.328	2	1.49816	0.00600279	3	Os01g0935900|AK069146VKQTELLTR00000000000
AK069146	Os01g0935900	Conserved hypothetical protein. (Os01t0935900-01), Similar to Succinate dehydrogenase subunit 4. (Os01t0935900-02)	23115.4	R-STYYMIPTLLLVSK-N	0000030000000000	139	152	822.95	2	0.274893	0.000330747	3	Os01g0935900|AK069146STYYMIPTLLLVSK0000030000000000
AK107072	Os01g0936700	Conserved hypothetical protein. (Os01t0936700-01), Hypothetical gene. (Os01t0936700-02)	54433.6	K-EAVATGNTVGSTGGR-S	00000000000000000	8	22	688.842	2	-0.102196	0.00561188	1	Os01g0936700|AK107072EAVATGNTVGSTGGR00000000000000000
AK105806	Os01g0937100	Similar to Xylanase inhibitor precursor (Xylanase inhibitor TAXI-I). (Os01t0937100-01)	44682	R-IGYFVPAVR-L	00000000000	327	335	511.296	2	1.0687	0.0398875	1	Os01g0937100|AK105806IGYFVPAVR00000000000
AK062398	Os01g0938400	Conserved hypothetical protein. (Os01t0938400-01)	18363.8	R-KAAAVGGAVR-A	000000000000	82	91	450.272	2	-5.77025	0.0407091	1	Os01g0938400|AK062398KAAAVGGAVR000000000000
AK101971	Os01g0938900	Similar to Nascent polypeptide-associated complex alpha subunit-like protein 3 (NAC-alpha-like protein 3) (Alpha-NAC-like protein 3). (Os01t0938900-01), Similar to Nascent polypeptide-associated complex alpha subunit-like protein 3 (NAC-alpha-like protein 3) (Alpha-NAC-like protein 3). (Os01t0938900-02)	22078.9	M-TAAETQEELLR-K	1000000000000	2	12	651.831	2	0.334692	7.28643e-05	6	Os01g0938900|AK101971TAAETQEELLR1000000000000
AK101971	Os01g0938900	Similar to Nascent polypeptide-associated complex alpha subunit-like protein 3 (NAC-alpha-like protein 3) (Alpha-NAC-like protein 3). (Os01t0938900-01), Similar to Nascent polypeptide-associated complex alpha subunit-like protein 3 (NAC-alpha-like protein 3) (Alpha-NAC-like protein 3). (Os01t0938900-02)	22078.9	K-SPNSDTYVIFGEAK-I	0000000000000000	105	118	764.371	2	1.61162	0.0160111	6	Os01g0938900|AK101971SPNSDTYVIFGEAK0000000000000000
AK101971	Os01g0938900	Similar to Nascent polypeptide-associated complex alpha subunit-like protein 3 (NAC-alpha-like protein 3) (Alpha-NAC-like protein 3). (Os01t0938900-01), Similar to Nascent polypeptide-associated complex alpha subunit-like protein 3 (NAC-alpha-like protein 3) (Alpha-NAC-like protein 3). (Os01t0938900-02)	22078.9	K-APDLSNVISK-A	000000000000	136	145	522.291	2	1.42462	0.000385494	6	Os01g0938900|AK101971APDLSNVISK000000000000
AK101971	Os01g0938900	Similar to Nascent polypeptide-associated complex alpha subunit-like protein 3 (NAC-alpha-like protein 3) (Alpha-NAC-like protein 3). (Os01t0938900-01), Similar to Nascent polypeptide-associated complex alpha subunit-like protein 3 (NAC-alpha-like protein 3) (Alpha-NAC-like protein 3). (Os01t0938900-02)	22078.9	K-AEPSAAAQDDEEVDESGVEPK-D	00000000000000000000000	146	166	1086.97	2	-1.0184	2.1394e-07	6	Os01g0938900|AK101971AEPSAAAQDDEEVDESGVEPK00000000000000000000000
AK101971	Os01g0938900	Similar to Nascent polypeptide-associated complex alpha subunit-like protein 3 (NAC-alpha-like protein 3) (Alpha-NAC-like protein 3). (Os01t0938900-01), Similar to Nascent polypeptide-associated complex alpha subunit-like protein 3 (NAC-alpha-like protein 3) (Alpha-NAC-like protein 3). (Os01t0938900-02)	22078.9	K-DIELVMTQATVSR-S	000000300000000	167	179	739.88	2	0.380624	1.78588e-08	6	Os01g0938900|AK101971DIELVMTQATVSR000000300000000
AK070064	Os01g0939100	Similar to Calmodulin-stimulated calcium-ATPase. (Os01t0939100-01)	113693	K-AALQFIDAVR-K	000000000000	77	86	552.313	2	-2.52295	9.6621e-05	11	Os01g0939100|AK070064AALQFIDAVR000000000000
AK070064	Os01g0939100	Similar to Calmodulin-stimulated calcium-ATPase. (Os01t0939100-01)	113693	R-FHNGVDGIAR-K	000000000000	122	131	543.278	2	0.193832	5.19882e-05	11	Os01g0939100|AK070064FHNGVDGIAR000000000000
AK070064	Os01g0939100	Similar to Calmodulin-stimulated calcium-ATPase. (Os01t0939100-01)	113693	R-KVAVSLADGVK-S	0000000000000	132	142	543.829	2	-1.52982	0.00189743	11	Os01g0939100|AK070064KVAVSLADGVK0000000000000
AK070064	Os01g0939100	Similar to Calmodulin-stimulated calcium-ATPase. (Os01t0939100-01)	113693	K-IWASGAAQTMSNAK-G	0000000000300000	475	488	726.35	2	-1.49239	7.95315e-08	11	Os01g0939100|AK070064IWASGAAQTMSNAK0000000000300000
AK070064	Os01g0939100	Similar to Calmodulin-stimulated calcium-ATPase. (Os01t0939100-01)	113693	K-IWASGAAQTMSNAK-G	0000000000000000	475	488	718.356	2	4.0508	0.00405788	11	Os01g0939100|AK070064IWASGAAQTMSNAK0000000000000000
AK070064	Os01g0939100	Similar to Calmodulin-stimulated calcium-ATPase. (Os01t0939100-01)	113693	K-GFDQLTSSMSETFAK-V	00000000000000000	489	503	824.875	2	-5.35972	6.57189e-07	11	Os01g0939100|AK070064GFDQLTSSMSETFAK00000000000000000
AK070064	Os01g0939100	Similar to Calmodulin-stimulated calcium-ATPase. (Os01t0939100-01)	113693	K-GFDQLTSSMSETFAK-V	00000000030000000	489	503	832.879	2	2.5591	1.39795e-06	11	Os01g0939100|AK070064GFDQLTSSMSETFAK00000000030000000
AK070064	Os01g0939100	Similar to Calmodulin-stimulated calcium-ATPase. (Os01t0939100-01)	113693	R-MVTGDNINTAK-A	0300000000000	684	694	590.288	2	0.839681	7.18319e-07	11	Os01g0939100|AK070064MVTGDNINTAK0300000000000
AK070064	Os01g0939100	Similar to Calmodulin-stimulated calcium-ATPase. (Os01t0939100-01)	113693	R-MVTGDNINTAK-A	0000000000000	684	694	582.289	2	-0.881197	0.0014677	11	Os01g0939100|AK070064MVTGDNINTAK0000000000000
AK070588	Os01g0939700	Similar to Esterase D (EC 3.1.1.1). (Os01t0939700-01), Similar to esterase D. (Os01t0939700-02)	32587.2	K-MFGGHNLR-F	0300000000	22	29	474.23	2	0.828006	0.0456738	4	Os01g0939700|AK070588MFGGHNLR0300000000
AK070588	Os01g0939700	Similar to Esterase D (EC 3.1.1.1). (Os01t0939700-01), Similar to esterase D. (Os01t0939700-02)	32587.2	R-AAAAHGIALVAPDTSPR-G	0000000000000000000	80	96	809.44	2	1.24252	0.000861889	4	Os01g0939700|AK070588AAAAHGIALVAPDTSPR0000000000000000000
AK070588	Os01g0939700	Similar to Esterase D (EC 3.1.1.1). (Os01t0939700-01), Similar to esterase D. (Os01t0939700-02)	32587.2	K-VLSDNFEQLNTSR-A	000000000000000	140	152	761.879	2	0.211696	1.72254e-07	4	Os01g0939700|AK070588VLSDNFEQLNTSR000000000000000
AK070588	Os01g0939700	Similar to Esterase D (EC 3.1.1.1). (Os01t0939700-01), Similar to esterase D. (Os01t0939700-02)	32587.2	K-AFSNYLGPAK-S	000000000000	197	206	534.28	2	0.283959	0.000116934	4	Os01g0939700|AK070588AFSNYLGPAK000000000000
AK072850	Os01g0945800	Nucleotide-binding, alpha-beta plait domain containing protein. (Os01t0945800-01), Nucleotide-binding, alpha-beta plait domain containing protein. (Os01t0945800-02)	40261.6	R-GFGYVTFSSADDAK-N	0000000000000000	45	58	732.839	2	4.61745	0.0493183	3	Os01g0945800|AK072850GFGYVTFSSADDAK0000000000000000
AK072850	Os01g0945800	Nucleotide-binding, alpha-beta plait domain containing protein. (Os01t0945800-01), Nucleotide-binding, alpha-beta plait domain containing protein. (Os01t0945800-02)	40261.6	R-LPQEANTEDLR-H	0000000000000	237	247	643.321	2	-3.31973	0.000229565	3	Os01g0945800|AK072850LPQEANTEDLR0000000000000
AK072850	Os01g0945800	Nucleotide-binding, alpha-beta plait domain containing protein. (Os01t0945800-01), Nucleotide-binding, alpha-beta plait domain containing protein. (Os01t0945800-02)	40261.6	R-GFGFVTFADEGVADR-V	00000000000000000	272	286	794.378	2	3.36377	0.0115376	3	Os01g0945800|AK072850GFGFVTFADEGVADR00000000000000000
AK070184	Os01g0948400	Similar to Pyrroline-5-carboxylate reductase (EC 1.5.1.2) (P5CR) (P5C reductase). (Os01t0948400-01), Similar to pyrroline 5-carboxylate reductase. (Os01t0948400-02)	30185.1	R-GVAASGVLPATAIR-T	0000000000000000	37	50	641.877	2	-0.490756	4.54852e-06	1	Os01g0948400|AK070184GVAASGVLPATAIR0000000000000000
AK103457	Os01g0952700	Metal-dependent hydrolase, composite domain containing protein. (Os01t0952700-01)	62934.8	K-NTNNPVGGTIMR-T	00000000000300	195	206	645.315	2	-2.47322	0.0245982	1	Os01g0952700|AK103457NTNNPVGGTIMR00000000000300
AK068882	Os01g0953100	Protein of unknown function DUF594 family protein. (Os01t0953100-01), Protein of unknown function DUF594 family protein. (Os01t0953100-02)	82150.3	R-FGDTCAETK-N	00000000000	580	588	521.733	2	7.57354	0.0346788	1	Os01g0953100|AK068882FGDTCAETK00000000000
AK101291	Os01g0955000	Phosphoesterase family protein. (Os01t0955000-01), Phosphoesterase family protein. (Os01t0955000-02), Similar to phosphoesterase family protein. (Os01t0955000-03)	57631.7	K-TVVVVVMENR-S	000000030000	32	41	581.319	2	0.779631	0.00961652	1	Os01g0955000|AK101291TVVVVVMENR000000030000
AK073433	Os01g0957200	Conserved hypothetical protein. (Os01t0957200-01)	42317.2	R-EALFVLAQLGR-K	0000000000000	104	114	608.858	2	2.66288	2.03337e-06	2	Os01g0957200|AK073433EALFVLAQLGR0000000000000
AK073433	Os01g0957200	Conserved hypothetical protein. (Os01t0957200-01)	42317.2	R-YQILAGVIEQR-M	0000000000000	331	341	645.363	2	-1.28796	2.88014e-05	2	Os01g0957200|AK073433YQILAGVIEQR0000000000000
AK070420	Os01g0959000	Nucleotide-binding, alpha-beta plait domain containing protein. (Os01t0959000-01)	48082.9	K-ALLYMDGGQIDGNVVK-L	000003000000000000	164	179	854.931	2	-1.55735	0.00143014	1	Os01g0959000|AK070420ALLYMDGGQIDGNVVK000003000000000000
J075129P18	Os01g0959200	Abscisic stress ripening protein 1. (Os01t0959200-01)	13350	R-CSATTRTR-R	0000000000	11	18	483.741	2	-3.24291	0.0197366	1	Os01g0959200|J075129P18CSATTRTR0000000000
AK073846	Os01g0962600	Similar to 40S ribosomal protein S10-1. (Os01t0962600-01)	19969.1	K-GGAPAEFQPSFR-G	00000000000000	146	157	632.309	2	-1.08713	0.0021828	1	Os01g0962600|AK073846GGAPAEFQPSFR00000000000000
AK104420	Os01g0962700	Similar to Peroxidase 12 precursor (EC 1.11.1.7) (Atperox P12) (PRXR6) (ATP4a). (Os01t0962700-01)	40252.7	K-TPGGPDGEQQAIPNESLRPAAFK-A	0000000000000000000000000	109	131	794.068	3	0.114035	0.00241581	1	Os01g0962700|AK104420TPGGPDGEQQAIPNESLRPAAFK0000000000000000000000000
013-066-F12	Os01g0964400	#N/A	24730.4	K-AGFAGDDAPR-A	000000000000	21	30	488.728	2	1.24353	1.39162e-05	11	Os01g0964400|013-066-F12AGFAGDDAPR000000000000
013-066-F12	Os01g0964400	#N/A	24730.4	R-AVFPSIVGRPR-H	0000000000000	31	41	599.857	2	1.81488	0.00127724	11	Os01g0964400|013-066-F12AVFPSIVGRPR0000000000000
013-066-F12	Os01g0964400	#N/A	24730.4	R-HTGVMVGMGQK-D	0000030030000	42	52	588.779	2	0.888456	0.0200177	11	Os01g0964400|013-066-F12HTGVMVGMGQK0000030030000
013-066-F12	Os01g0964400	#N/A	24730.4	K-DAYVGDEAQSK-R	0000000000000	53	63	591.767	2	-0.140863	2.75212e-06	11	Os01g0964400|013-066-F12DAYVGDEAQSK0000000000000
013-066-F12	Os01g0964400	#N/A	24730.4	K-DAYVGDEAQSKR-G	00000000000000	53	64	669.817	2	-1.14188	0.00573991	11	Os01g0964400|013-066-F12DAYVGDEAQSKR00000000000000
013-066-F12	Os01g0964400	#N/A	24730.4	R-VAPEEHPVLLTEAPLNPK-A	00000000000000000000	98	115	977.535	2	-1.11901	1.29799e-05	11	Os01g0964400|013-066-F12VAPEEHPVLLTEAPLNPK00000000000000000000
013-066-F12	Os01g0964400	#N/A	24730.4	K-EITALAPSSMK-I	0000000000300	163	173	582.303	2	1.64663	0.000174362	11	Os01g0964400|013-066-F12EITALAPSSMK0000000000300
013-066-F12	Os01g0964400	#N/A	24730.4	K-IKVVAPPER-K	00000000000	174	182	504.814	2	-0.0978606	0.000889998	11	Os01g0964400|013-066-F12IKVVAPPER00000000000
Os01g0964900	Os01g0964900	Similar to Mitochondrial carrier protein-like. (Os01t0964900-00)	37507.7	R-EVVAEEGLMGLSR-G	000000000300000	298	310	703.353	2	0.00283945	0.000200267	1	Os01g0964900|Os01g0964900EVVAEEGLMGLSR000000000300000
AK120672	Os01g0966000	Similar to Plasma membrane H+-ATPase (EC 3.6.1.3). (Os01t0966000-01), Similar to Plasma membrane H+-ATPase (EC 3.6.1.3). (Os01t0966000-02), Similar to predicted protein. (Os01t0966000-03), Similar to Plasma membrane H+-ATPase (EC 3.6.1.3). (Os01t0966000-04)	56106.1	K-AAVVGGNVLTSQR-V	000000000000000	330	342	636.359	2	3.22577	0.042216	2	Os01g0966000|AK120672AAVVGGNVLTSQR000000000000000
AK120672	Os01g0966000	Similar to Plasma membrane H+-ATPase (EC 3.6.1.3). (Os01t0966000-01), Similar to Plasma membrane H+-ATPase (EC 3.6.1.3). (Os01t0966000-02), Similar to predicted protein. (Os01t0966000-03), Similar to Plasma membrane H+-ATPase (EC 3.6.1.3). (Os01t0966000-04)	56106.1	R-MTDPEIFEQR-Y	030000000000	402	411	641.293	2	1.30313	0.0440713	2	Os01g0966000|AK120672MTDPEIFEQR030000000000
AK070623	Os01g0969100	NAD(P)-binding domain containing protein. (Os01t0969100-01)	44943.7	M-SSSSSPPAASAAAR-L	1000000000000000	2	15	644.809	2	-1.255	0.000113535	6	Os01g0969100|AK070623SSSSSPPAASAAAR1000000000000000
AK070623	Os01g0969100	NAD(P)-binding domain containing protein. (Os01t0969100-01)	44943.7	R-HLVDPAPPHLHGR-I	000000000000000	65	77	482.597	3	0.505922	0.0284662	6	Os01g0969100|AK070623HLVDPAPPHLHGR000000000000000
AK070623	Os01g0969100	NAD(P)-binding domain containing protein. (Os01t0969100-01)	44943.7	R-MDFIPGVDGPSEGVPR-V	030000000000000000	228	243	844.902	2	1.06985	0.000212858	6	Os01g0969100|AK070623MDFIPGVDGPSEGVPR030000000000000000
AK070623	Os01g0969100	NAD(P)-binding domain containing protein. (Os01t0969100-01)	44943.7	R-REPLKLVDGGQSQR-T	0000000000000000	255	268	528.294	3	0.141066	0.0402661	6	Os01g0969100|AK070623REPLKLVDGGQSQR0000000000000000
AK070623	Os01g0969100	NAD(P)-binding domain containing protein. (Os01t0969100-01)	44943.7	R-ANGQIFNVGNPNNEVTVR-Q	00000000000000000000	290	307	971.991	2	1.06115	3.16819e-07	6	Os01g0969100|AK070623ANGQIFNVGNPNNEVTVR00000000000000000000
AK120840	Os01g0971500	Similar to Cytochrome b5. (Os01t0971500-01)	15080.7	K-FLEDHPGGDDVLLSSTAK-D	00000000000000000000	35	52	950.968	2	-0.233199	0.00687092	5	Os01g0971500|AK120840FLEDHPGGDDVLLSSTAK00000000000000000000
AK120840	Os01g0971500	Similar to Cytochrome b5. (Os01t0971500-01)	15080.7	K-DATDDFEDVGHSTTAR-A	000000000000000000	53	68	868.87	2	-1.51343	5.49507e-05	5	Os01g0971500|AK120840DATDDFEDVGHSTTAR000000000000000000
AK120840	Os01g0971500	Similar to Cytochrome b5. (Os01t0971500-01)	15080.7	R-AMMDEYYVGDIDATTIPTK-V	003300000000000000000	69	87	1083.48	2	-0.898578	0.0190129	5	Os01g0971500|AK120840AMMDEYYVGDIDATTIPTK003300000000000000000
AK121398	Os01g0974000	Mammalian cell entry related domain containing protein. (Os01t0974000-01), Mammalian cell entry related domain containing protein. (Os01t0974000-02)	40549.5	R-GVTVGNVVR-V	00000000000	140	148	450.767	2	0.816778	0.000419701	3	Os01g0974000|AK121398GVTVGNVVR00000000000
AK121398	Os01g0974000	Mammalian cell entry related domain containing protein. (Os01t0974000-01), Mammalian cell entry related domain containing protein. (Os01t0974000-02)	40549.5	K-VASIMEEAQPLLSR-I	0000030000000000	258	271	780.411	2	3.75471	1.14336e-05	3	Os01g0974000|AK121398VASIMEEAQPLLSR0000030000000000
AK121398	Os01g0974000	Mammalian cell entry related domain containing protein. (Os01t0974000-01), Mammalian cell entry related domain containing protein. (Os01t0974000-02)	40549.5	K-GLADASGDLR-R	000000000000	301	310	487.749	2	1.08847	0.0015363	3	Os01g0974000|AK121398GLADASGDLR000000000000
J065170O14	Os01g0974700	0	9228.53	R-VLYSSVVYPHNYGFIPR-T	0000000000000000000	30	46	671.02	3	1.21076	0.000177554	1	Os01g0974700|J065170O14VLYSSVVYPHNYGFIPR0000000000000000000
AK111768	Os01g0975900	Similar to Tonoplast membrane integral protein ZmTIP1-2. (Os01t0975900-01), Similar to Tonoplast membrane integral protein ZmTIP1-2. (Os01t0975900-02)	25375.3	R-IAVGAPGELSHPDTAK-A	000000000000000000	6	21	781.912	2	-0.143693	3.10561e-06	1	Os01g0975900|AK111768IAVGAPGELSHPDTAK000000000000000000
AK061022	Os01g0976200	11-S plant seed storage protein family protein. (Os01t0976200-01)	40664.6	R-TSSDSAASAEAMVMDLSPK-R	000000000000303000000	5	23	965.425	2	0.767254	4.26078e-06	4	Os01g0976200|AK061022TSSDSAASAEAMVMDLSPK000000000000303000000
AK061022	Os01g0976200	11-S plant seed storage protein family protein. (Os01t0976200-01)	40664.6	K-LSLAAGGLALPFYSDSAK-V	00000000000000000000	57	74	890.979	2	1.83523	0.00050463	4	Os01g0976200|AK061022LSLAAGGLALPFYSDSAK00000000000000000000
AK061022	Os01g0976200	11-S plant seed storage protein family protein. (Os01t0976200-01)	40664.6	R-VVVLNTQNLPLVK-E	000000000000000	225	237	718.946	2	1.23411	3.35618e-08	4	Os01g0976200|AK061022VVVLNTQNLPLVK000000000000000
AK061022	Os01g0976200	11-S plant seed storage protein family protein. (Os01t0976200-01)	40664.6	K-EVGLGADLVR-I	000000000000	238	247	514.791	2	1.70609	0.000601169	4	Os01g0976200|AK061022EVGLGADLVR000000000000
AK065652	Os01g0978100	Similar to Cysteine synthase, mitochondrial precursor (EC 2.5.1.47) (O- acetylserine sulfhydrylase) (O-acetylserine (Thiol)-lyase) (CSase C) (CS-C) (OAS-TL C) (AtCS-C). (Os01t0978100-01)	42187.9	K-LVVVVFPSFGER-Y	00000000000000	362	373	674.885	2	0.18642	4.74733e-05	1	Os01g0978100|AK065652LVVVVFPSFGER00000000000000
AK071514	Os02g0100100	Thioredoxin domain domain containing protein. (Os02t0100100-01)	62498.6	K-VDATEDTDLAQK-Y	00000000000000	131	142	653.313	2	1.58867	3.21883e-05	1	Os02g0100100|AK071514VDATEDTDLAQK00000000000000
AK102264	Os02g0100300	Similar to HSP associated protein like. (Os02t0100300-01)	44194.4	K-AILLNPLSAIMYGTR-A	00000000000300000	154	168	824.961	2	3.50437	0.0142074	2	Os02g0100300|AK102264AILLNPLSAIMYGTR00000000000300000
AK102264	Os02g0100300	Similar to HSP associated protein like. (Os02t0100300-01)	44194.4	R-DANAALEINPDSAK-G	0000000000000000	184	197	714.851	2	-1.62462	0.00606633	2	Os02g0100300|AK102264DANAALEINPDSAK0000000000000000
AK061193	Os02g0102700	Similar to AGL157Cp. (Os02t0102700-01)	14413.6	K-LLHEAAGHVVTVELK-T	00000000000000000	11	25	539.311	3	0.746473	0.00155336	3	Os02g0102700|AK061193LLHEAAGHVVTVELK00000000000000000
AK061193	Os02g0102700	Similar to AGL157Cp. (Os02t0102700-01)	14413.6	K-VSQLEHVFIR-G	000000000000	57	66	614.349	2	5.4058	0.0293775	3	Os02g0102700|AK061193VSQLEHVFIR000000000000
AK102186	Os02g0103700	Similar to 60S ribosomal protein L9 (Gibberellin-regulated protein GA). (Os02t0103700-01), Similar to 60S ribosomal protein L9 (Gibberellin-regulated protein GA). (Os02t0103700-02)	21700.6	K-LQVDAWFGTR-R	000000000000	56	65	596.812	2	5.15205	0.0223745	5	Os02g0103700|AK102186LQVDAWFGTR000000000000
AK102186	Os02g0103700	Similar to 60S ribosomal protein L9 (Gibberellin-regulated protein GA). (Os02t0103700-01), Similar to 60S ribosomal protein L9 (Gibberellin-regulated protein GA). (Os02t0103700-02)	21700.6	R-TAISHVQNLITGVTK-G	00000000000000000	73	87	791.453	2	1.86571	1.11636e-06	5	Os02g0103700|AK102186TAISHVQNLITGVTK00000000000000000
AK102186	Os02g0103700	Similar to 60S ribosomal protein L9 (Gibberellin-regulated protein GA). (Os02t0103700-01), Similar to 60S ribosomal protein L9 (Gibberellin-regulated protein GA). (Os02t0103700-02)	21700.6	R-KVDMLEGVTILR-S	00003000000000	126	137	695.393	2	0.802699	9.34627e-06	5	Os02g0103700|AK102186KVDMLEGVTILR00003000000000
AK102186	Os02g0103700	Similar to 60S ribosomal protein L9 (Gibberellin-regulated protein GA). (Os02t0103700-01), Similar to 60S ribosomal protein L9 (Gibberellin-regulated protein GA). (Os02t0103700-02)	21700.6	K-VDMLEGVTILR-S	0003000000000	127	137	631.348	2	5.02407	0.001148	5	Os02g0103700|AK102186VDMLEGVTILR0003000000000
AK102186	Os02g0103700	Similar to 60S ribosomal protein L9 (Gibberellin-regulated protein GA). (Os02t0103700-01), Similar to 60S ribosomal protein L9 (Gibberellin-regulated protein GA). (Os02t0103700-02)	21700.6	K-FLDGIYVSDK-G	000000000000	176	185	578.798	2	0.600201	0.0491387	5	Os02g0103700|AK102186FLDGIYVSDK000000000000
AK070860	Os02g0104800	Uncharacterised conserved protein UCP022280 domain containing protein. (Os02t0104800-01)	29595.4	R-RGEAFGADMASAAR-A	0000000003000000	44	57	475.889	3	-0.940105	0.0165982	9	Os02g0104800|AK070860RGEAFGADMASAAR0000000003000000
AK070860	Os02g0104800	Uncharacterised conserved protein UCP022280 domain containing protein. (Os02t0104800-01)	29595.4	R-AAMDTAIAHSQSTAIAAAEAASSAK-A	000300000000000000000000000	58	82	787.717	3	0.424736	0.00128607	9	Os02g0104800|AK070860AAMDTAIAHSQSTAIAAAEAASSAK000300000000000000000000000
AK070860	Os02g0104800	Uncharacterised conserved protein UCP022280 domain containing protein. (Os02t0104800-01)	29595.4	K-ADALAAFPSLTLNAK-E	00000000000000000	83	97	751.916	2	1.89727	0.0186882	9	Os02g0104800|AK070860ADALAAFPSLTLNAK00000000000000000
AK070860	Os02g0104800	Uncharacterised conserved protein UCP022280 domain containing protein. (Os02t0104800-01)	29595.4	K-ETLLSGIQAGVNHMR-Q	00000000000000300	163	177	821.422	2	-1.04629	0.00840777	9	Os02g0104800|AK070860ETLLSGIQAGVNHMR00000000000000300
AK070860	Os02g0104800	Uncharacterised conserved protein UCP022280 domain containing protein. (Os02t0104800-01)	29595.4	R-QTVNLVSNESQK-L	00000000000000	178	189	673.848	2	-1.3025	0.00859082	9	Os02g0104800|AK070860QTVNLVSNESQK00000000000000
AK070860	Os02g0104800	Uncharacterised conserved protein UCP022280 domain containing protein. (Os02t0104800-01)	29595.4	R-AIQSELNQISDIEK-Q	0000000000000000	214	227	794.409	2	-7.26474	0.0356572	9	Os02g0104800|AK070860AIQSELNQISDIEK0000000000000000
AK070860	Os02g0104800	Uncharacterised conserved protein UCP022280 domain containing protein. (Os02t0104800-01)	29595.4	K-SILNQLPR-A	0000000000	234	241	470.784	2	2.59437	0.0247796	9	Os02g0104800|AK070860SILNQLPR0000000000
AK070860	Os02g0104800	Uncharacterised conserved protein UCP022280 domain containing protein. (Os02t0104800-01)	29595.4	R-AHASEFQSEISGLASQVK-K	00000000000000000000	242	259	630.318	3	-0.448791	0.000948243	9	Os02g0104800|AK070860AHASEFQSEISGLASQVK00000000000000000000
AK063525	Os02g0105200	Similar to Dihydrolipoamide S-acetyltransferase (EC 2.3.1.12). (Os02t0105200-01)	59600.6	K-ADIEDYLASVAK-G	00000000000000	293	304	647.833	2	4.52345	0.0125155	5	Os02g0105200|AK063525ADIEDYLASVAK00000000000000
AK063525	Os02g0105200	Similar to Dihydrolipoamide S-acetyltransferase (EC 2.3.1.12). (Os02t0105200-01)	59600.6	R-EALAAPGLSYTDVPNTQIR-K	000000000000000000000	309	327	1008.52	2	-5.32973	0.000984257	5	Os02g0105200|AK063525EALAAPGLSYTDVPNTQIR000000000000000000000
AK063525	Os02g0105200	Similar to Dihydrolipoamide S-acetyltransferase (EC 2.3.1.12). (Os02t0105200-01)	59600.6	R-GELNPLQESSGGK-K	000000000000000	360	372	658.328	2	0.0204751	0.00453535	5	Os02g0105200|AK063525GELNPLQESSGGK000000000000000
AK063525	Os02g0105200	Similar to Dihydrolipoamide S-acetyltransferase (EC 2.3.1.12). (Os02t0105200-01)	59600.6	K-KISINDLVIK-A	000000000000	373	382	571.862	2	1.79535	0.00855421	5	Os02g0105200|AK063525KISINDLVIK000000000000
AK063525	Os02g0105200	Similar to Dihydrolipoamide S-acetyltransferase (EC 2.3.1.12). (Os02t0105200-01)	59600.6	K-ISINDLVIK-A	00000000000	374	382	507.812	2	-2.73967	8.86286e-06	5	Os02g0105200|AK063525ISINDLVIK00000000000
AK063525	Os02g0105200	Similar to Dihydrolipoamide S-acetyltransferase (EC 2.3.1.12). (Os02t0105200-01)	59600.6	K-GLGTIAEEVK-Q	000000000000	433	442	508.786	2	1.49668	0.0020677	5	Os02g0105200|AK063525GLGTIAEEVK000000000000
AK103257	Os02g0105400	Similar to L-lactate dehydrogenase A (EC 1.1.1.27) (LDH-A). (Os02t0105400-01), Similar to L-lactate dehydrogenase. (Os02t0105400-02)	42764.2	R-DMADEIALVDAVPDKLR-G	0030000000000000000	101	117	629.656	3	0.840912	0.020579	3	Os02g0105400|AK103257DMADEIALVDAVPDKLR0030000000000000000
AK103257	Os02g0105400	Similar to L-lactate dehydrogenase A (EC 1.1.1.27) (LDH-A). (Os02t0105400-01), Similar to L-lactate dehydrogenase. (Os02t0105400-02)	42764.2	R-GSDLAIVTAGAR-Q	00000000000000	146	157	565.812	2	0.403126	9.37316e-06	3	Os02g0105400|AK103257GSDLAIVTAGAR00000000000000
AK103257	Os02g0105400	Similar to L-lactate dehydrogenase A (EC 1.1.1.27) (LDH-A). (Os02t0105400-01), Similar to L-lactate dehydrogenase. (Os02t0105400-02)	42764.2	R-VIGSGTNLDSSR-F	00000000000000	216	227	603.308	2	-2.08004	6.55973e-06	3	Os02g0105400|AK103257VIGSGTNLDSSR00000000000000
AK102953	Os02g0105500	IQ calmodulin-binding region domain containing protein. (Os02t0105500-01), IQ calmodulin-binding region domain containing protein. (Os02t0105500-02)	45315	R-VSALELAAPR-S	000000000000	113	122	513.801	2	1.0431	0.00185424	1	Os02g0105500|AK102953VSALELAAPR000000000000
AK102423	Os02g0105900	Similar to 40S ribosomal protein S4. (Os02t0105900-01), Similar to 40S ribosomal protein S4. (Os02t0105900-02), Similar to 40S ribosomal protein S4. (Os02t0105900-03)	29988.3	K-FDVGNVVMVTGGR-N	000000003000000	175	187	683.843	2	0.175951	0.0156354	2	Os02g0105900|AK102423FDVGNVVMVTGGR000000003000000
AK102423	Os02g0105900	Similar to 40S ribosomal protein S4. (Os02t0105900-01), Similar to 40S ribosomal protein S4. (Os02t0105900-02), Similar to 40S ribosomal protein S4. (Os02t0105900-03)	29988.3	R-LGNVFTIGK-G	00000000000	222	230	474.78	2	2.46538	0.00794087	2	Os02g0105900|AK102423LGNVFTIGK00000000000
AK072245	Os02g0106100	Similar to Fructosyltransferase. (Os02t0106100-01)	72857.9	K-IAWGHAVSR-D	00000000000	168	176	498.772	2	-0.582256	5.34559e-05	11	Os02g0106100|AK072245IAWGHAVSR00000000000
AK072245	Os02g0106100	Similar to Fructosyltransferase. (Os02t0106100-01)	72857.9	K-YHANPVLYPPR-T	0000000000000	246	256	663.855	2	5.27477	0.0155691	11	Os02g0106100|AK072245YHANPVLYPPR0000000000000
AK072245	Os02g0106100	Similar to Fructosyltransferase. (Os02t0106100-01)	72857.9	R-IVIGSKDEHHAGIAVVYR-T	00000000000000000000	280	297	655.363	3	1.70534	0.0135928	11	Os02g0106100|AK072245IVIGSKDEHHAGIAVVYR00000000000000000000
AK072245	Os02g0106100	Similar to Fructosyltransferase. (Os02t0106100-01)	72857.9	K-DEHHAGIAVVYR-T	00000000000000	286	297	456.233	3	-1.22328	0.0313852	11	Os02g0106100|AK072245DEHHAGIAVVYR00000000000000
AK072245	Os02g0106100	Similar to Fructosyltransferase. (Os02t0106100-01)	72857.9	K-ASMDDDRHDYYALGR-Y	00030000000000000	353	367	600.924	3	-0.899326	0.000300632	11	Os02g0106100|AK072245ASMDDDRHDYYALGR00030000000000000
AK072245	Os02g0106100	Similar to Fructosyltransferase. (Os02t0106100-01)	72857.9	R-NAWTPLDAAADVGIGLR-Y	0000000000000000000	373	389	870.455	2	-2.579	7.01457e-05	11	Os02g0106100|AK072245NAWTPLDAAADVGIGLR0000000000000000000
AK072245	Os02g0106100	Similar to Fructosyltransferase. (Os02t0106100-01)	72857.9	K-GWASLQSIPR-T	000000000000	428	437	557.805	2	1.88704	6.54119e-06	11	Os02g0106100|AK072245GWASLQSIPR000000000000
AK072245	Os02g0106100	Similar to Fructosyltransferase. (Os02t0106100-01)	72857.9	R-GALGPFGLLVLADK-R	0000000000000000	523	536	685.905	2	-0.690043	0.0101753	11	Os02g0106100|AK072245GALGPFGLLVLADK0000000000000000
AK072245	Os02g0106100	Similar to Fructosyltransferase. (Os02t0106100-01)	72857.9	R-GALGPFGLLVLADKR-H	00000000000000000	523	537	763.957	2	0.880432	0.00149163	11	Os02g0106100|AK072245GALGPFGLLVLADKR00000000000000000
AK072245	Os02g0106100	Similar to Fructosyltransferase. (Os02t0106100-01)	72857.9	R-HRGDGEQTAVYFYVAK-G	000000000000000000	538	553	614.307	3	4.46167	0.00227655	11	Os02g0106100|AK072245HRGDGEQTAVYFYVAK000000000000000000
AK072245	Os02g0106100	Similar to Fructosyltransferase. (Os02t0106100-01)	72857.9	R-GDGEQTAVYFYVAK-G	0000000000000000	540	553	774.373	2	1.2194	0.00347639	11	Os02g0106100|AK072245GDGEQTAVYFYVAK0000000000000000
AK072245	Os02g0106100	Similar to Fructosyltransferase. (Os02t0106100-01)	72857.9	R-SSHADDIVK-R	00000000000	570	578	486.245	2	2.56335	0.00054354	11	Os02g0106100|AK072245SSHADDIVK00000000000
AK072245	Os02g0106100	Similar to Fructosyltransferase. (Os02t0106100-01)	72857.9	R-SSHADDIVKR-V	000000000000	570	579	564.295	2	2.40048	0.000367391	11	Os02g0106100|AK072245SSHADDIVKR000000000000
AK072245	Os02g0106100	Similar to Fructosyltransferase. (Os02t0106100-01)	72857.9	R-VVGNVVPVLDGETFSLR-V	0000000000000000000	580	596	901	2	3.55208	5.92725e-08	11	Os02g0106100|AK072245VVGNVVPVLDGETFSLR0000000000000000000
AK072245	Os02g0106100	Similar to Fructosyltransferase. (Os02t0106100-01)	72857.9	R-VLVDHSIVESFAQGGR-S	000000000000000000	597	612	857.449	2	-0.203854	6.28634e-08	11	Os02g0106100|AK072245VLVDHSIVESFAQGGR000000000000000000
J065048C09	Os02g0107200	Similar to diphosphomevalonate decarboxylase. (Os02t0107200-01)	16133.3	M-AAAEEGQWVLMATGR-S	10000000000300000	2	16	824.392	2	-1.79549	0.0132094	1	Os02g0107200|J065048C09AAAEEGQWVLMATGR10000000000300000
AK105694	Os02g0110200	Similar to Hydroperoxide lyase. (Os02t0110200-01), Similar to Hydroperoxide lyase. (Os02t0110200-02)	54103	K-HGAAAVSIAEK-E	0000000000000	262	272	527.288	2	-0.514863	0.000826237	1	Os02g0110200|AK105694HGAAAVSIAEK0000000000000
AF324485	Os02g0112900	Similar to Viroid RNA-binding protein (Fragment). (Os02t0112900-00)	53320.4	K-ELISMFTAR-E	00000300000	119	127	542.279	2	0.600971	0.00067992	3	Os02g0112900|AF324485ELISMFTAR00000300000
AF324485	Os02g0112900	Similar to Viroid RNA-binding protein (Fragment). (Os02t0112900-00)	53320.4	K-VFFTNSGSEANDSQVK-I	000000000000000000	132	147	865.405	2	-0.204291	5.89412e-10	3	Os02g0112900|AF324485VFFTNSGSEANDSQVK000000000000000000
AK065094	Os02g0115700	Catalase isozyme A (EC 1.11.1.6) (CAT-A). (Os02t0115700-01), Similar to Catalase. (Os02t0115700-02), Similar to Catalase. (Os02t0115700-03)	57230.4	R-SPGAQTPVIVR-F	0000000000000	92	102	562.824	2	-1.16701	2.62514e-05	2	Os02g0115700|AK065094SPGAQTPVIVR0000000000000
AK065094	Os02g0115700	Catalase isozyme A (EC 1.11.1.6) (CAT-A). (Os02t0115700-01), Similar to Catalase. (Os02t0115700-02), Similar to Catalase. (Os02t0115700-03)	57230.4	R-FSTVIHER-G	0000000000	103	110	494.764	2	0.0494179	0.000966292	2	Os02g0115700|AK065094FSTVIHER0000000000
AK065743	Os02g0115900	Endosperm lumenal binding protein. (Os02t0115900-01), Endosperm lumenal binding protein. (Os02t0115900-02), Similar to Endosperm lumenal binding protein. (Os02t0115900-03)	73629	K-NQAAVNPER-T	00000000000	86	94	499.755	2	1.36592	0.000608726	12	Os02g0115900|AK065743NQAAVNPER00000000000
AK065743	Os02g0115900	Endosperm lumenal binding protein. (Os02t0115900-01), Endosperm lumenal binding protein. (Os02t0115900-02), Similar to Endosperm lumenal binding protein. (Os02t0115900-03)	73629	K-FEDKEVQR-D	0000000000	107	114	525.765	2	1.12762	0.0292858	12	Os02g0115900|AK065743FEDKEVQR0000000000
AK065743	Os02g0115900	Endosperm lumenal binding protein. (Os02t0115900-01), Endosperm lumenal binding protein. (Os02t0115900-02), Similar to Endosperm lumenal binding protein. (Os02t0115900-03)	73629	K-MKETAEAYLGK-K	0300000000000	157	167	628.813	2	0.481883	1.78001e-05	12	Os02g0115900|AK065743MKETAEAYLGK0300000000000
AK065743	Os02g0115900	Endosperm lumenal binding protein. (Os02t0115900-01), Endosperm lumenal binding protein. (Os02t0115900-02), Similar to Endosperm lumenal binding protein. (Os02t0115900-03)	73629	K-DAGVIAGLNVAR-I	00000000000000	190	201	578.327	2	-1.92807	5.66525e-06	12	Os02g0115900|AK065743DAGVIAGLNVAR00000000000000
AK065743	Os02g0115900	Endosperm lumenal binding protein. (Os02t0115900-01), Endosperm lumenal binding protein. (Os02t0115900-02), Similar to Endosperm lumenal binding protein. (Os02t0115900-03)	73629	R-IMEYFIK-L	003000000	266	272	480.248	2	-1.51686	0.0296125	12	Os02g0115900|AK065743IMEYFIK003000000
AK065743	Os02g0115900	Endosperm lumenal binding protein. (Os02t0115900-01), Endosperm lumenal binding protein. (Os02t0115900-02), Similar to Endosperm lumenal binding protein. (Os02t0115900-03)	73629	R-ALSNQHQVR-V	00000000000	302	310	526.785	2	3.53453	0.0335997	12	Os02g0115900|AK065743ALSNQHQVR00000000000
AK065743	Os02g0115900	Endosperm lumenal binding protein. (Os02t0115900-01), Endosperm lumenal binding protein. (Os02t0115900-02), Similar to Endosperm lumenal binding protein. (Os02t0115900-03)	73629	K-KAMDDAGLEK-S	000300000000	348	357	547.264	2	1.30227	0.00867981	12	Os02g0115900|AK065743KAMDDAGLEK000300000000
AK065743	Os02g0115900	Endosperm lumenal binding protein. (Os02t0115900-01), Endosperm lumenal binding protein. (Os02t0115900-02), Similar to Endosperm lumenal binding protein. (Os02t0115900-03)	73629	R-EAEEFAEEDKK-V	0000000000000	550	560	662.797	2	-2.57982	0.0236825	12	Os02g0115900|AK065743EAEEFAEEDKK0000000000000
AK065743	Os02g0115900	Endosperm lumenal binding protein. (Os02t0115900-01), Endosperm lumenal binding protein. (Os02t0115900-02), Similar to Endosperm lumenal binding protein. (Os02t0115900-03)	73629	R-NQLETYVYNMK-N	0000000000300	569	579	709.834	2	-0.415704	4.40067e-06	12	Os02g0115900|AK065743NQLETYVYNMK0000000000300
AK061815	Os02g0117400	Peptidase A22B, signal peptide peptidase domain containing protein. (Os02t0117400-01)	38394.2	R-AANLALAGLSLAPLVVK-V	0000000000000000000	7	23	811.007	2	0.909466	2.24578e-05	2	Os02g0117400|AK061815AANLALAGLSLAPLVVK0000000000000000000
AK061815	Os02g0117400	Peptidase A22B, signal peptide peptidase domain containing protein. (Os02t0117400-01)	38394.2	K-AEEEDAVEEDTDSK-Q	0000000000000000	324	337	783.817	2	-1.69146	8.04302e-05	2	Os02g0117400|AK061815AEEEDAVEEDTDSK0000000000000000
AK071248	Os02g0117700	UDP-glucose pyrophosphorylase (UGPase)2. (Os02t0117700-01)	51864.2	K-LREAVAGLSQISDNEK-S	000000000000000000	9	24	865.457	2	-0.33527	0.00651508	11	Os02g0117700|AK071248LREAVAGLSQISDNEK000000000000000000
AK071248	Os02g0117700	UDP-glucose pyrophosphorylase (UGPase)2. (Os02t0117700-01)	51864.2	R-EAVAGLSQISDNEK-S	0000000000000000	11	24	730.866	2	0.83621	0.000280258	11	Os02g0117700|AK071248EAVAGLSQISDNEK0000000000000000
AK071248	Os02g0117700	UDP-glucose pyrophosphorylase (UGPase)2. (Os02t0117700-01)	51864.2	K-SGFISLVAR-Y	00000000000	25	33	475.278	2	2.2539	0.000390064	11	Os02g0117700|AK071248SGFISLVAR00000000000
AK071248	Os02g0117700	UDP-glucose pyrophosphorylase (UGPase)2. (Os02t0117700-01)	51864.2	K-YTNSNIEVHTFNQSQYPR-V	00000000000000000000	148	165	733.346	3	-0.865613	0.00358246	11	Os02g0117700|AK071248YTNSNIEVHTFNQSQYPR00000000000000000000
AK071248	Os02g0117700	UDP-glucose pyrophosphorylase (UGPase)2. (Os02t0117700-01)	51864.2	K-LDLLLSQGK-E	00000000000	203	211	493.799	2	2.8981	0.00471844	11	Os02g0117700|AK071248LDLLLSQGK00000000000
AK071248	Os02g0117700	UDP-glucose pyrophosphorylase (UGPase)2. (Os02t0117700-01)	51864.2	K-MEIIPNPK-E	0300000000	313	320	479.257	2	0.0749586	0.0450993	11	Os02g0117700|AK071248MEIIPNPK0300000000
AK071248	Os02g0117700	UDP-glucose pyrophosphorylase (UGPase)2. (Os02t0117700-01)	51864.2	K-VLQLETAAGAAIR-F	000000000000000	327	339	656.883	2	0.126161	1.52584e-05	11	Os02g0117700|AK071248VLQLETAAGAAIR000000000000000
AK071248	Os02g0117700	UDP-glucose pyrophosphorylase (UGPase)2. (Os02t0117700-01)	51864.2	R-TNPSNPSIELGPEFK-K	00000000000000000	385	399	815.41	2	0.42074	0.00167155	11	Os02g0117700|AK071248TNPSNPSIELGPEFK00000000000000000
AK071248	Os02g0117700	UDP-glucose pyrophosphorylase (UGPase)2. (Os02t0117700-01)	51864.2	K-LEIPDGAVIENK-D	00000000000000	448	459	649.356	2	3.44653	0.018695	11	Os02g0117700|AK071248LEIPDGAVIENK00000000000000
AK064002	Os02g0118400	Similar to CMP-N-acetylneuraminate-beta-galactosamide-alpha-2,6-sialyltransferase (EC 2.4.99.1) (Beta-galactoside alpha-2,6-sialyltransferase) (Alpha 2,6-ST) (Sialyltransferase 1) (ST6Gal I) (B-cell antigen CD75). (Os02t0118400-01), Similar to CMP-N-acetylneuraminate-beta-galactosamide-alpha-2,6-sialyltransferase (EC 2.4.99.1) (Beta-galactoside alpha-2,6-sialyltransferase) (Alpha 2,6-ST) (Sialylt…	49256.2	R-CAVVGNSGDLLKTK-F	0000000000000000	174	187	738.399	2	1.40045	0.0281212	1	Os02g0118400|AK064002CAVVGNSGDLLKTK0000000000000000
AK102774	Os02g0119400	Similar to Syntaxin 52 (AtSYP52). (Os02t0119400-01), Similar to Syntaxin 52 (AtSYP52). (Os02t0119400-02)	26076.8	R-VAGLDNQGIVSLQR-Q	0000000000000000	123	136	735.405	2	-2.90666	0.0058847	1	Os02g0119400|AK102774VAGLDNQGIVSLQR0000000000000000
AK100842	Os02g0120800	Rac-like GTP-binding protein 6. (Os02t0120800-01), Similar to Small GTP-binding protein (Fragment). (Os02t0120800-02)	21894.5	R-LRPLSYR-G	000000000	70	76	452.772	2	-0.593901	0.0489774	2	Os02g0120800|AK100842LRPLSYR000000000
AK100842	Os02g0120800	Rac-like GTP-binding protein 6. (Os02t0120800-01), Similar to Small GTP-binding protein (Fragment). (Os02t0120800-02)	21894.5	K-ASYENVSKK-W	00000000000	91	99	513.267	2	1.18419	0.00458524	2	Os02g0120800|AK100842ASYENVSKK00000000000
AK100842	Os02g0120800	Rac-like GTP-binding protein 6. (Os02t0120800-01), Similar to Small GTP-binding protein (Fragment). (Os02t0120800-02)	21894.5	R-DDKQFFVDHPGAVPITTAQGEELRK-Q	000000000000000000000000000	124	148	700.359	4	0.961337	0.0221003	2	Os02g0120800|AK100842DDKQFFVDHPGAVPITTAQGEELRK000000000000000000000000000
AK061894	Os02g0121300	Cyclophilin 2. (Os02t0121300-01), Cyclophilin 2. (Os02t0121300-02)	18704.2	R-VFFDMTVGGAPAGR-I	0000030000000000	6	19	720.852	2	1.41302	1.43671e-08	14	Os02g0121300|AK061894VFFDMTVGGAPAGR0000030000000000
AK061894	Os02g0121300	Cyclophilin 2. (Os02t0121300-01), Cyclophilin 2. (Os02t0121300-02)	18704.2	R-VFFDMTVGGAPAGR-I	0000000000000000	6	19	712.853	2	-0.406942	1.56354e-08	14	Os02g0121300|AK061894VFFDMTVGGAPAGR0000000000000000
AK061894	Os02g0121300	Cyclophilin 2. (Os02t0121300-01), Cyclophilin 2. (Os02t0121300-02)	18704.2	R-IVMELYAK-D	0000000000	20	27	483.77	2	0.113454	0.0119495	14	Os02g0121300|AK061894IVMELYAK0000000000
AK061894	Os02g0121300	Cyclophilin 2. (Os02t0121300-01), Cyclophilin 2. (Os02t0121300-02)	18704.2	R-IVMELYAK-D	0003000000	20	27	491.765	2	-5.63038	0.0143187	14	Os02g0121300|AK061894IVMELYAK0003000000
AK061894	Os02g0121300	Cyclophilin 2. (Os02t0121300-01), Cyclophilin 2. (Os02t0121300-02)	18704.2	R-IVMELYAKDVPR-T	00030000000000	20	31	725.395	2	3.38242	0.00992381	14	Os02g0121300|AK061894IVMELYAKDVPR00030000000000
AK061894	Os02g0121300	Cyclophilin 2. (Os02t0121300-01), Cyclophilin 2. (Os02t0121300-02)	18704.2	K-SGKPLHYK-G	0000000000	49	56	465.264	2	0.918991	0.0185341	14	Os02g0121300|AK061894SGKPLHYK0000000000
AK061894	Os02g0121300	Cyclophilin 2. (Os02t0121300-01), Cyclophilin 2. (Os02t0121300-02)	18704.2	R-GNGTGGESIYGEK-F	000000000000000	77	89	634.793	2	2.22869	0.00134546	14	Os02g0121300|AK061894GNGTGGESIYGEK000000000000000
AK061894	Os02g0121300	Cyclophilin 2. (Os02t0121300-01), Cyclophilin 2. (Os02t0121300-02)	18704.2	R-VVEGMDVVK-A	00000300000	139	147	496.259	2	-2.76713	1.00968e-05	14	Os02g0121300|AK061894VVEGMDVVK00000300000
AK061894	Os02g0121300	Cyclophilin 2. (Os02t0121300-01), Cyclophilin 2. (Os02t0121300-02)	18704.2	R-GGSTAKPVVIADCGQLS--	0000000000000000000	156	172	837.431	2	0.727543	9.49502e-05	14	Os02g0121300|AK061894GGSTAKPVVIADCGQLS0000000000000000000
AK121653	Os02g0122000	Similar to P18. (Os02t0122000-01)	17203.9	R-GKEPKDEVQIYTWK-D	0000000000000000	63	76	574.302	3	1.43633	0.0335094	2	Os02g0122000|AK121653GKEPKDEVQIYTWK0000000000000000
AK121653	Os02g0122000	Similar to P18. (Os02t0122000-01)	17203.9	R-LSFAFVYPDK-H	000000000000	101	110	593.814	2	5.24359	0.00179583	2	Os02g0122000|AK121653LSFAFVYPDK000000000000
Os02g0124600	Os02g0124600	D-arabinono-1,4-lactone oxidase domain containing protein. (Os02t0124600-00)	63715.3	--MQGSVVTARR-A	100000000000	1	10	573.809	2	5.62701	0.0252509	1	Os02g0124600|Os02g0124600MQGSVVTARR100000000000
AK063621	Os02g0126700	Similar to Small nuclear ribonucleoprotein homolog. (Os02t0126700-01)	10335.6	R-IMTQPINLIFR-F	0030000000000	9	19	681.384	2	-0.563459	0.00557583	2	Os02g0126700|AK063621IMTQPINLIFR0030000000000
AK063621	Os02g0126700	Similar to Small nuclear ribonucleoprotein homolog. (Os02t0126700-01)	10335.6	K-GDNITLMMNTGK--	00000003300000	77	88	663.803	2	-3.19414	4.48402e-05	2	Os02g0126700|AK063621GDNITLMMNTGK00000003300000
AK071820	Os02g0126800	Similar to Golgi SNARE 12 protein (AtGOS12) (Golgi SNAP receptor complex member 1-2). (Os02t0126800-01)	27106.1	R-SSSAADAASASSPSER-S	000000000000000000	50	65	740.829	2	-0.781169	0.0274851	1	Os02g0126800|AK071820SSSAADAASASSPSER000000000000000000
AK105450	Os02g0127000	Tetratricopeptide region domain containing protein. (Os02t0127000-01), Similar to predicted protein. (Os02t0127000-02)	25787.2	R-LEALLFEAK-G	00000000000	29	37	517.3	2	0.499703	4.13236e-06	6	Os02g0127000|AK105450LEALLFEAK00000000000
AK105450	Os02g0127000	Tetratricopeptide region domain containing protein. (Os02t0127000-01), Similar to predicted protein. (Os02t0127000-02)	25787.2	R-AYALILENNPFDQIVHK-R	0000000000000000000	46	62	662.357	3	4.25758	0.0205117	6	Os02g0127000|AK105450AYALILENNPFDQIVHK0000000000000000000
AK105450	Os02g0127000	Tetratricopeptide region domain containing protein. (Os02t0127000-01), Similar to predicted protein. (Os02t0127000-02)	25787.2	K-AQGDMALAVEYLNK-Y	0000030000000000	70	83	769.88	2	0.865236	0.000184268	6	Os02g0127000|AK105450AQGDMALAVEYLNK0000030000000000
AK105450	Os02g0127000	Tetratricopeptide region domain containing protein. (Os02t0127000-01), Similar to predicted protein. (Os02t0127000-02)	25787.2	K-YYASTIQLTGGK-N	00000000000000	151	162	651.341	2	0.415422	4.37988e-08	6	Os02g0127000|AK105450YYASTIQLTGGK00000000000000
AK105450	Os02g0127000	Tetratricopeptide region domain containing protein. (Os02t0127000-01), Similar to predicted protein. (Os02t0127000-02)	25787.2	R-NKEEESSELQSLASEALLK-D	000000000000000000000	185	203	702.358	3	-0.137434	3.79901e-05	6	Os02g0127000|AK105450NKEEESSELQSLASEALLK000000000000000000000
AK105450	Os02g0127000	Tetratricopeptide region domain containing protein. (Os02t0127000-01), Similar to predicted protein. (Os02t0127000-02)	25787.2	K-EALITSLLK-N	00000000000	213	221	494.309	2	3.09095	0.0388842	6	Os02g0127000|AK105450EALITSLLK00000000000
Os02g0127100	Os02g0127100	Cell division protein FtsZ family protein. (Os02t0127100-00)	19848.1	K-VAGAAEGAAGAAPK-V	0000000000000000	223	236	570.804	2	-0.832442	7.86303e-05	1	Os02g0127100|Os02g0127100VAGAAEGAAGAAPK0000000000000000
AK060422	Os02g0127700	Similar to Ribose-phosphate pyrophosphokinase. (Os02t0127700-01), Ribose-phosphate pyrophosphokinase 1 (EC 2.7.6.1) (Phosphoribosyl pyrophosphate synthetase 1). (Os02t0127700-02)	43537.7	R-SSPVVVRCKK-I	000000000000	30	39	587.339	2	-5.03444	0.0488487	1	Os02g0127700|AK060422SSPVVVRCKK000000000000
AK103009	Os02g0128600	Similar to ADP-ribosylation factor-like protein. (Os02t0128600-01)	21856.3	K-NVVFTVWDVGGQEK-L	0000000000000000	60	73	789.401	2	-0.177756	0.000525112	1	Os02g0128600|AK103009NVVFTVWDVGGQEK0000000000000000
AK106464	Os02g0130000	Similar to SWIb domain-containing protein (Fragment). (Os02t0130000-01)	13854.3	R-GIMQPVPVSDALSR-F	0003000000000000	50	63	743.392	2	2.1299	4.40836e-05	2	Os02g0130000|AK106464GIMQPVPVSDALSR0003000000000000
AK106464	Os02g0130000	Similar to SWIb domain-containing protein (Fragment). (Os02t0130000-01)	13854.3	R-FAGGAPEMSR-A	000000003000	64	73	519.738	2	0.965922	0.0161187	2	Os02g0130000|AK106464FAGGAPEMSR000000003000
AK066913	Os02g0131300	Conserved hypothetical protein. (Os02t0131300-01), Non-protein coding transcript. (Os02t0131300-02)	27393.6	R-TPVNGDDLLK-G	000000000000	39	48	536.289	2	2.6959	0.0448457	23	Os02g0131300|AK066913TPVNGDDLLK000000000000
AK066913	Os02g0131300	Conserved hypothetical protein. (Os02t0131300-01), Non-protein coding transcript. (Os02t0131300-02)	27393.6	K-KFETALGVLK-K	000000000000	57	66	553.332	2	-3.7468	0.0220044	23	Os02g0131300|AK066913KFETALGVLK000000000000
AK066913	Os02g0131300	Conserved hypothetical protein. (Os02t0131300-01), Non-protein coding transcript. (Os02t0131300-02)	27393.6	K-KFETALGVLKK-E	0000000000000	57	67	617.383	2	1.38343	0.000986945	23	Os02g0131300|AK066913KFETALGVLKK0000000000000
AK066913	Os02g0131300	Conserved hypothetical protein. (Os02t0131300-01), Non-protein coding transcript. (Os02t0131300-02)	27393.6	K-FETALGVLKK-E	000000000000	58	67	553.334	2	-0.662046	0.000448561	23	Os02g0131300|AK066913FETALGVLKK000000000000
AK066913	Os02g0131300	Conserved hypothetical protein. (Os02t0131300-01), Non-protein coding transcript. (Os02t0131300-02)	27393.6	K-EKITIDPDDPAAVSR-Y	00000000000000000	68	82	542.951	3	2.32983	0.000428856	23	Os02g0131300|AK066913EKITIDPDDPAAVSR00000000000000000
AK066913	Os02g0131300	Conserved hypothetical protein. (Os02t0131300-01), Non-protein coding transcript. (Os02t0131300-02)	27393.6	K-ITIDPDDPAAVSR-Y	000000000000000	70	82	685.352	2	1.38484	3.72551e-07	23	Os02g0131300|AK066913ITIDPDDPAAVSR000000000000000
AK066913	Os02g0131300	Conserved hypothetical protein. (Os02t0131300-01), Non-protein coding transcript. (Os02t0131300-02)	27393.6	R-QKADLLSDSER-I	2000000000000	92	102	622.81	2	0.22202	0.000141814	23	Os02g0131300|AK066913QKADLLSDSER2000000000000
AK066913	Os02g0131300	Conserved hypothetical protein. (Os02t0131300-01), Non-protein coding transcript. (Os02t0131300-02)	27393.6	R-QKADLLSDSER-I	0000000000000	92	102	631.323	2	0.38113	0.000787242	23	Os02g0131300|AK066913QKADLLSDSER0000000000000
AK066913	Os02g0131300	Conserved hypothetical protein. (Os02t0131300-01), Non-protein coding transcript. (Os02t0131300-02)	27393.6	K-ADLLSDSER-I	00000000000	94	102	503.248	2	4.37873	0.0201406	23	Os02g0131300|AK066913ADLLSDSER00000000000
AK066913	Os02g0131300	Conserved hypothetical protein. (Os02t0131300-01), Non-protein coding transcript. (Os02t0131300-02)	27393.6	R-IKYTIDTFTK-G	000000000000	103	112	615.343	2	0.433195	0.0111784	23	Os02g0131300|AK066913IKYTIDTFTK000000000000
AK066913	Os02g0131300	Conserved hypothetical protein. (Os02t0131300-01), Non-protein coding transcript. (Os02t0131300-02)	27393.6	R-TYLNTLQEIR-I	000000000000	119	128	625.841	2	0.272793	1.66886e-05	23	Os02g0131300|AK066913TYLNTLQEIR000000000000
AK066913	Os02g0131300	Conserved hypothetical protein. (Os02t0131300-01), Non-protein coding transcript. (Os02t0131300-02)	27393.6	K-NMGLLLAEFEK-I	0030000000000	165	175	640.83	2	-2.87066	2.11321e-05	23	Os02g0131300|AK066913NMGLLLAEFEK0030000000000
AK066913	Os02g0131300	Conserved hypothetical protein. (Os02t0131300-01), Non-protein coding transcript. (Os02t0131300-02)	27393.6	K-IEEELELEIAK-S	0000000000000	190	200	658.353	2	-0.405696	0.0169672	23	Os02g0131300|AK066913IEEELELEIAK0000000000000
AK066913	Os02g0131300	Conserved hypothetical protein. (Os02t0131300-01), Non-protein coding transcript. (Os02t0131300-02)	27393.6	R-EEFKDEEMPDVK-K	00000000300000	221	232	756.332	2	-0.70708	0.00238357	23	Os02g0131300|AK066913EEFKDEEMPDVK00000000300000
AK066913	Os02g0131300	Conserved hypothetical protein. (Os02t0131300-01), Non-protein coding transcript. (Os02t0131300-02)	27393.6	R-EEFKDEEMPDVKK-L	000000003000000	221	233	547.254	3	-2.79246	0.0468651	23	Os02g0131300|AK066913EEFKDEEMPDVKK000000003000000
AK109376	Os02g0133800	Proteasome subunit alpha type 1 (EC 3.4.25.1) (20S proteasome alpha subunit F) (20S proteasome subunit alpha-6) (Proteasome component C2). (Os02t0133800-01), Similar to Proteasome subunit alpha type. (Os02t0133800-02)	29966.9	R-NQYDTDVTTWSPAGR-L	00000000000000000	4	18	855.891	2	1.26386	3.12055e-06	8	Os02g0133800|AK109376NQYDTDVTTWSPAGR00000000000000000
AK109376	Os02g0133800	Proteasome subunit alpha type 1 (EC 3.4.25.1) (20S proteasome alpha subunit F) (20S proteasome subunit alpha-6) (Proteasome component C2). (Os02t0133800-01), Similar to Proteasome subunit alpha type. (Os02t0133800-02)	29966.9	R-LFQVEYAMEAVK-Q	00000000300000	19	30	722.364	2	0.839817	0.00698997	8	Os02g0133800|AK109376LFQVEYAMEAVK00000000300000
AK109376	Os02g0133800	Proteasome subunit alpha type 1 (EC 3.4.25.1) (20S proteasome alpha subunit F) (20S proteasome subunit alpha-6) (Proteasome component C2). (Os02t0133800-01), Similar to Proteasome subunit alpha type. (Os02t0133800-02)	29966.9	R-THAVLAAANK-A	000000000000	42	51	498.285	2	0.354501	0.000364674	8	Os02g0133800|AK109376THAVLAAANK000000000000
AK109376	Os02g0133800	Proteasome subunit alpha type 1 (EC 3.4.25.1) (20S proteasome alpha subunit F) (20S proteasome subunit alpha-6) (Proteasome component C2). (Os02t0133800-01), Similar to Proteasome subunit alpha type. (Os02t0133800-02)	29966.9	K-AASELSSHQR-K	000000000000	52	61	543.269	2	-2.81107	9.68278e-06	8	Os02g0133800|AK109376AASELSSHQR000000000000
AK109376	Os02g0133800	Proteasome subunit alpha type 1 (EC 3.4.25.1) (20S proteasome alpha subunit F) (20S proteasome subunit alpha-6) (Proteasome component C2). (Os02t0133800-01), Similar to Proteasome subunit alpha type. (Os02t0133800-02)	29966.9	R-VADHAGVALAGLTADGR-V	0000000000000000000	66	82	797.421	2	0.110216	8.83225e-09	8	Os02g0133800|AK109376VADHAGVALAGLTADGR0000000000000000000
AK109376	Os02g0133800	Proteasome subunit alpha type 1 (EC 3.4.25.1) (20S proteasome alpha subunit F) (20S proteasome subunit alpha-6) (Proteasome component C2). (Os02t0133800-01), Similar to Proteasome subunit alpha type. (Os02t0133800-02)	29966.9	R-FEGYNDYTPEQLIK-D	0000000000000000	176	189	858.91	2	0.17618	3.33677e-05	8	Os02g0133800|AK109376FEGYNDYTPEQLIK0000000000000000
AK109376	Os02g0133800	Proteasome subunit alpha type 1 (EC 3.4.25.1) (20S proteasome alpha subunit F) (20S proteasome subunit alpha-6) (Proteasome component C2). (Os02t0133800-01), Similar to Proteasome subunit alpha type. (Os02t0133800-02)	29966.9	R-KDDGTVEPFEMIDVKR-I	000000000003000000	217	232	632.311	3	-2.13058	0.0486542	8	Os02g0133800|AK109376KDDGTVEPFEMIDVKR000000000003000000
AK100570	Os02g0135700	DNA polymerase V family protein. (Os02t0135700-01), Hypothetical conserved gene. (Os02t0135700-02)	146100	R-QSAESDAAAAKPK-Q	000000000000000	60	72	637.315	2	-12.0495	0.0125472	1	Os02g0135700|AK100570QSAESDAAAAKPK000000000000000
AB055156	Os02g0135800	Similar to Sec13-like protein (Fragment). (Os02t0135800-01), Similar to Sec13-like protein (Fragment). (Os02t0135800-02), Similar to Sec13p. (Os02t0135800-03)	33703.5	R-IATASSDNTIK-I	0000000000000	26	36	560.795	2	-0.676393	0.0487306	2	Os02g0135800|AB055156IATASSDNTIK0000000000000
AB055156	Os02g0135800	Similar to Sec13-like protein (Fragment). (Os02t0135800-01), Similar to Sec13-like protein (Fragment). (Os02t0135800-02), Similar to Sec13p. (Os02t0135800-03)	33703.5	R-VLYDFQTPVWR-L	0000000000000	257	267	712.374	2	2.99208	0.00398545	2	Os02g0135800|AB055156VLYDFQTPVWR0000000000000
AK073353	Os02g0137100	Conserved hypothetical protein CHP01589, plant domain containing protein. (Os02t0137100-01)	36322.1	R-SPFIPSEPNNFSESTPGDHAEIGNR-R	000000000000000000000000000	288	312	900.414	3	-2.45908	0.0298326	1	Os02g0137100|AK073353SPFIPSEPNNFSESTPGDHAEIGNR000000000000000000000000000
AK068480	Os02g0137400	WD40 repeat-like domain containing protein. (Os02t0137400-01)	95501.1	R-TNVDMVTGQLSDTR-S	0000030000000000	299	312	776.869	2	2.68551	0.000410603	3	Os02g0137400|AK068480TNVDMVTGQLSDTR0000030000000000
AK068480	Os02g0137400	WD40 repeat-like domain containing protein. (Os02t0137400-01)	95501.1	R-LPQDLSDEIEEDPTGGK-I	0000000000000000000	687	703	921.934	2	0.427979	3.24581e-05	3	Os02g0137400|AK068480LPQDLSDEIEEDPTGGK0000000000000000000
AK064810	Os02g0138200	RNA recognition motif, RNP-1 domain containing protein. (Os02t0138200-01), Similar to Marker Xucw84. (Os02t0138200-02), Similar to Marker Xucw84. (Os02t0138200-03)	61253.4	R-NGSEQNSLASEPK-R	000000000000000	386	398	680.82	2	-1.19825	0.0096929	1	Os02g0138200|AK064810NGSEQNSLASEPK000000000000000
AK121211	Os02g0139700	Similar to Cycloartenol synthase. (Os02t0139700-01)	86621.4	R-LLGEGPDSGDGAMEK-G	00000000000003000	187	201	746.335	2	-0.746645	0.000424889	1	Os02g0139700|AK121211LLGEGPDSGDGAMEK00000000000003000
AK067944	Os02g0142300	Similar to Nuclear protein-like. (Os02t0142300-01)	83574.4	R-ATVNTFGYIAK-A	0000000000000	611	621	592.82	2	1.27141	0.000638805	1	Os02g0142300|AK067944ATVNTFGYIAK0000000000000
AK063330	Os02g0143100	Similar to Sucrose-phosphatase (EC 3.1.3.24). (Os02t0143100-01)	47864.1	R-SPTLYMELR-K	00000030000	55	63	563.284	2	0.738978	0.0138154	5	Os02g0143100|AK063330SPTLYMELR00000030000
AK063330	Os02g0143100	Similar to Sucrose-phosphatase (EC 3.1.3.24). (Os02t0143100-01)	47864.1	R-NIVVEETANVSELK-L	0000000000000000	105	118	772.912	2	0.531062	4.99354e-08	5	Os02g0143100|AK063330NIVVEETANVSELK0000000000000000
AK063330	Os02g0143100	Similar to Sucrose-phosphatase (EC 3.1.3.24). (Os02t0143100-01)	47864.1	K-IIYSGGQDLDVLPQGAGK-G	00000000000000000000	159	176	915.985	2	1.81899	0.00112197	5	Os02g0143100|AK063330IIYSGGQDLDVLPQGAGK00000000000000000000
AK063330	Os02g0143100	Similar to Sucrose-phosphatase (EC 3.1.3.24). (Os02t0143100-01)	47864.1	K-GQALAYLLK-K	00000000000	177	185	488.794	2	-1.12188	4.08578e-05	5	Os02g0143100|AK063330GQALAYLLK00000000000
AK063330	Os02g0143100	Similar to Sucrose-phosphatase (EC 3.1.3.24). (Os02t0143100-01)	47864.1	K-SDSVTQYFK-N	00000000000	304	312	537.759	2	1.32061	0.0121849	5	Os02g0143100|AK063330SDSVTQYFK00000000000
AK071377	Os02g0146400	Similar to Splicing factor 3B subunit 1 (Spliceosome associated protein 155) (SAP 155) (SF3b155) (Pre-mRNA splicing factor SF3b 155 kDa subunit). (Os02t0146400-01), Similar to predicted protein. (Os02t0146400-02)	40437.2	R-ATVNTFGYIAK-A	0000000000000	130	140	592.82	2	1.27141	0.000638805	1	Os02g0146400|AK071377ATVNTFGYIAK0000000000000
AK073620	Os02g0146600	Similar to Eukaryotic initiation factor 4A (eIF4A) (eIF-4A). (Os02t0146600-01)	47463.2	R-GIYAYGFEKPSAIQQR-G	000000000000000000	55	70	914.472	2	-0.60897	3.03685e-06	25	Os02g0146600|AK073620GIYAYGFEKPSAIQQR000000000000000000
AK073620	Os02g0146600	Similar to Eukaryotic initiation factor 4A (eIF4A) (eIF-4A). (Os02t0146600-01)	47463.2	K-GLDVIQQAQSGTGK-T	0000000000000000	78	91	701.371	2	0.399357	1.54689e-07	25	Os02g0146600|AK073620GLDVIQQAQSGTGK0000000000000000
AK073620	Os02g0146600	Similar to Eukaryotic initiation factor 4A (eIF4A) (eIF-4A). (Os02t0146600-01)	47463.2	R-ELAQQIEK-V	0000000000	120	127	479.764	2	-0.238159	0.00958723	25	Os02g0146600|AK073620ELAQQIEK0000000000
AK073620	Os02g0146600	Similar to Eukaryotic initiation factor 4A (eIF4A) (eIF-4A). (Os02t0146600-01)	47463.2	R-ALGDYLGVK-V	00000000000	131	139	468.264	2	1.16457	0.02479	25	Os02g0146600|AK073620ALGDYLGVK00000000000
AK073620	Os02g0146600	Similar to Eukaryotic initiation factor 4A (eIF4A) (eIF-4A). (Os02t0146600-01)	47463.2	R-ILASGVHVVVGTPGR-V	00000000000000000	155	169	731.431	2	0.186364	8.66218e-08	25	Os02g0146600|AK073620ILASGVHVVVGTPGR00000000000000000
AK073620	Os02g0146600	Similar to Eukaryotic initiation factor 4A (eIF4A) (eIF-4A). (Os02t0146600-01)	47463.2	K-MFVLDEADEMLSR-G	030000000030000	186	198	794.356	2	1.0907	2.04523e-07	25	Os02g0146600|AK073620MFVLDEADEMLSR030000000030000
AK073620	Os02g0146600	Similar to Eukaryotic initiation factor 4A (eIF4A) (eIF-4A). (Os02t0146600-01)	47463.2	K-IQVGVFSATMPPEALEITR-K	000000000030000000000	215	233	1038.05	2	-0.0606321	0.036342	25	Os02g0146600|AK073620IQVGVFSATMPPEALEITR000000000030000000000
AK073620	Os02g0146600	Similar to Eukaryotic initiation factor 4A (eIF4A) (eIF-4A). (Os02t0146600-01)	47463.2	K-RDELTLEGIK-Q	000000000000	246	255	587.329	2	2.62775	6.59391e-05	25	Os02g0146600|AK073620RDELTLEGIK000000000000
AK073620	Os02g0146600	Similar to Eukaryotic initiation factor 4A (eIF4A) (eIF-4A). (Os02t0146600-01)	47463.2	R-DELTLEGIK-Q	00000000000	247	255	509.278	2	1.85876	0.000145247	25	Os02g0146600|AK073620DELTLEGIK00000000000
AK073620	Os02g0146600	Similar to Eukaryotic initiation factor 4A (eIF4A) (eIF-4A). (Os02t0146600-01)	47463.2	R-DHTVSATHGDMDQNTR-D	000000000000000000	304	319	595.591	3	-1.08001	0.00234949	25	Os02g0146600|AK073620DHTVSATHGDMDQNTR000000000000000000
AK073620	Os02g0146600	Similar to Eukaryotic initiation factor 4A (eIF4A) (eIF-4A). (Os02t0146600-01)	47463.2	R-DHTVSATHGDMDQNTR-D	000000000003000000	304	319	600.922	3	-3.46164	0.00701511	25	Os02g0146600|AK073620DHTVSATHGDMDQNTR000000000003000000
AK073620	Os02g0146600	Similar to Eukaryotic initiation factor 4A (eIF4A) (eIF-4A). (Os02t0146600-01)	47463.2	R-VLITTDLLAR-G	000000000000	333	342	557.845	2	-0.754224	2.83416e-06	25	Os02g0146600|AK073620VLITTDLLAR000000000000
AK073620	Os02g0146600	Similar to Eukaryotic initiation factor 4A (eIF4A) (eIF-4A). (Os02t0146600-01)	47463.2	R-KGVAINFVTR-D	000000000000	377	386	552.83	2	0.218475	1.28706e-05	25	Os02g0146600|AK073620KGVAINFVTR000000000000
AK073620	Os02g0146600	Similar to Eukaryotic initiation factor 4A (eIF4A) (eIF-4A). (Os02t0146600-01)	47463.2	K-GVAINFVTR-D	00000000000	378	386	488.783	2	0.854446	0.000353164	25	Os02g0146600|AK073620GVAINFVTR00000000000
AK073620	Os02g0146600	Similar to Eukaryotic initiation factor 4A (eIF4A) (eIF-4A). (Os02t0146600-01)	47463.2	K-GVAINFVTRDDER-M	000000000000000	378	390	497.924	3	1.21259	0.015828	25	Os02g0146600|AK073620GVAINFVTRDDER000000000000000
AK073620	Os02g0146600	Similar to Eukaryotic initiation factor 4A (eIF4A) (eIF-4A). (Os02t0146600-01)	47463.2	R-MLFDIQR-F	030000000	391	397	469.742	2	-0.555497	0.00101768	25	Os02g0146600|AK073620MLFDIQR030000000
AK105609	Os02g0146700	Similar to predicted protein. (Os02t0146700-01), Similar to PSMD2 subunit (Fragment). (Os02t0146700-02)	98734.8	R-NLAGEIAQEFQK-R	00000000000000	161	172	674.35	2	1.96118	0.00687745	1	Os02g0146700|AK105609NLAGEIAQEFQK00000000000000
AK105609	Os02g0146700	Similar to predicted protein. (Os02t0146700-01), Similar to PSMD2 subunit (Fragment). (Os02t0146700-02)	98734.8	K-QESVEATAEVSK-T	00000000000000	582	593	639.315	2	0.0570025	0.00786557	1	Os02g0146700|AK105609QESVEATAEVSK00000000000000
Os02g0147300	Os02g0147300	Hypothetical conserved gene. (Os02t0147300-01)	128710	R-ATVNTFGYIAK-A	0000000000000	930	940	592.82	2	1.27141	0.000638805	1	Os02g0147300|Os02g0147300ATVNTFGYIAK0000000000000
AK068931	Os02g0148500	Similar to TIMING OF CAB 1 (Fragment). (Os02t0148500-01)	35118.8	R-VQAVLLLLGGR-E	0000000000000	126	136	569.87	2	2.34288	1.31146e-05	1	Os02g0148500|AK068931VQAVLLLLGGR0000000000000
AK101547	Os02g0161900	Polyubiquitin. (Os02t0161900-01)	51155.5	K-TITLEVESSDTIDNVK-A	000000000000000000	12	27	882.45	2	1.10475	0.000100279	48	Os02g0161900|AK101547TITLEVESSDTIDNVK000000000000000000
AK101547	Os02g0161900	Polyubiquitin. (Os02t0161900-01)	51155.5	K-IQDKEGIPPDQQR-L	000000000000000	30	42	762.395	2	1.082	0.000353557	48	Os02g0161900|AK101547IQDKEGIPPDQQR000000000000000
AK101547	Os02g0161900	Polyubiquitin. (Os02t0161900-01)	51155.5	R-TLADYNIQK-E	00000000000	55	63	533.284	2	3.1509	0.0132602	48	Os02g0161900|AK101547TLADYNIQK00000000000
AK101547	Os02g0161900	Polyubiquitin. (Os02t0161900-01)	51155.5	K-ESTLHLVLR-L	00000000000	64	72	534.314	2	0.362399	6.49208e-06	48	Os02g0161900|AK101547ESTLHLVLR00000000000
AK063787	Os02g0162000	Cytochrome c oxidase, subunit VIIa domain containing protein. (Os02t0162000-01), Cytochrome c oxidase, subunit VIIa domain containing protein. (Os02t0162000-02)	7645.99	M-TESPFLPR-E	0000000000	2	9	473.753	2	-0.195888	0.0185843	5	Os02g0162000|AK063787TESPFLPR0000000000
AK063787	Os02g0162000	Cytochrome c oxidase, subunit VIIa domain containing protein. (Os02t0162000-01), Cytochrome c oxidase, subunit VIIa domain containing protein. (Os02t0162000-02)	7645.99	K-QQQYFQNLTK-H	000000000000	15	24	649.331	2	0.82111	3.08125e-05	5	Os02g0162000|AK063787QQQYFQNLTK000000000000
AK063787	Os02g0162000	Cytochrome c oxidase, subunit VIIa domain containing protein. (Os02t0162000-01), Cytochrome c oxidase, subunit VIIa domain containing protein. (Os02t0162000-02)	7645.99	R-GVYNMSHGVGK-K	0000030000000	55	65	582.777	2	-0.157592	0.00145319	5	Os02g0162000|AK063787GVYNMSHGVGK0000030000000
AK063787	Os02g0162000	Cytochrome c oxidase, subunit VIIa domain containing protein. (Os02t0162000-01), Cytochrome c oxidase, subunit VIIa domain containing protein. (Os02t0162000-02)	7645.99	R-GVYNMSHGVGK-K	0000000000000	55	65	574.779	2	-0.560971	0.00812034	5	Os02g0162000|AK063787GVYNMSHGVGK0000000000000
AK063787	Os02g0162000	Cytochrome c oxidase, subunit VIIa domain containing protein. (Os02t0162000-01), Cytochrome c oxidase, subunit VIIa domain containing protein. (Os02t0162000-02)	7645.99	R-GVYNMSHGVGKKE--	000003000000000	55	67	711.346	2	0.570643	0.0288388	5	Os02g0162000|AK063787GVYNMSHGVGKKE000003000000000
AK121223	Os02g0162500	Similar to 40S ribosomal protein S14. (Os02t0162500-01)	16423.7	K-TPGPGAQSALR-A	0000000000000	106	116	527.784	2	-3.5496	0.000196763	1	Os02g0162500|AK121223TPGPGAQSALR0000000000000
AK121574	Os02g0167300	Tubulin beta-3 chain (Beta-3 tubulin). (Os02t0167300-01), Similar to Tubulin beta-5 chain. (Os02t0167300-02)	50854.2	K-YSGDSDLQLER-I	0000000000000	36	46	641.8	2	1.34877	0.000678395	14	Os02g0167300|AK121574YSGDSDLQLER0000000000000
AK121574	Os02g0167300	Tubulin beta-3 chain (Beta-3 tubulin). (Os02t0167300-01), Similar to Tubulin beta-5 chain. (Os02t0167300-02)	50854.2	R-AVLMDLEPGTMDSVR-S	00003000000300000	63	77	833.395	2	-0.200742	1.20083e-05	14	Os02g0167300|AK121574AVLMDLEPGTMDSVR00003000000300000
AK121574	Os02g0167300	Tubulin beta-3 chain (Beta-3 tubulin). (Os02t0167300-01), Similar to Tubulin beta-5 chain. (Os02t0167300-02)	50854.2	R-MMLTFSVFPSPK-V	03300000000000	163	174	708.841	2	-10.9735	0.00176679	14	Os02g0167300|AK121574MMLTFSVFPSPK03300000000000
AK121574	Os02g0167300	Tubulin beta-3 chain (Beta-3 tubulin). (Os02t0167300-01), Similar to Tubulin beta-5 chain. (Os02t0167300-02)	50854.2	K-LAVNLIPFPR-L	000000000000	253	262	570.352	2	2.46692	1.28367e-06	14	Os02g0167300|AK121574LAVNLIPFPR000000000000
AK121574	Os02g0167300	Tubulin beta-3 chain (Beta-3 tubulin). (Os02t0167300-01), Similar to Tubulin beta-5 chain. (Os02t0167300-02)	50854.2	R-LHFFMVGFAPLTSR-G	0000030000000000	263	276	819.927	2	0.518311	0.00327548	14	Os02g0167300|AK121574LHFFMVGFAPLTSR0000030000000000
AK121574	Os02g0167300	Tubulin beta-3 chain (Beta-3 tubulin). (Os02t0167300-01), Similar to Tubulin beta-5 chain. (Os02t0167300-02)	50854.2	R-YLTASAMFR-G	00000003000	310	318	538.266	2	0.582264	0.00308439	14	Os02g0167300|AK121574YLTASAMFR00000003000
AK121574	Os02g0167300	Tubulin beta-3 chain (Beta-3 tubulin). (Os02t0167300-01), Similar to Tubulin beta-5 chain. (Os02t0167300-02)	50854.2	K-NSSYFVEWIPNNVK-S	0000000000000000	337	350	848.923	2	2.95024	0.00969616	14	Os02g0167300|AK121574NSSYFVEWIPNNVK0000000000000000
AK121574	Os02g0167300	Tubulin beta-3 chain (Beta-3 tubulin). (Os02t0167300-01), Similar to Tubulin beta-5 chain. (Os02t0167300-02)	50854.2	K-MASTFIGNSTSIQEMFR-R	0300000000000003000	363	379	976.448	2	0.195405	7.81642e-05	14	Os02g0167300|AK121574MASTFIGNSTSIQEMFR0300000000000003000
AK121574	Os02g0167300	Tubulin beta-3 chain (Beta-3 tubulin). (Os02t0167300-01), Similar to Tubulin beta-5 chain. (Os02t0167300-02)	50854.2	R-RVSEQFTAMFR-R	0000000003000	380	390	694.344	2	1.44603	0.00354285	14	Os02g0167300|AK121574RVSEQFTAMFR0000000003000
AK121574	Os02g0167300	Tubulin beta-3 chain (Beta-3 tubulin). (Os02t0167300-01), Similar to Tubulin beta-5 chain. (Os02t0167300-02)	50854.2	R-VSEQFTAMFR-R	000000003000	381	390	616.293	2	1.16313	6.64549e-06	14	Os02g0167300|AK121574VSEQFTAMFR000000003000
AK069128	Os02g0167700	Armadillo-like helical domain containing protein. (Os02t0167700-01)	136248	K-ILVSLAPQLIK-G	0000000000000	124	134	597.895	2	0.341458	0.000521486	9	Os02g0167700|AK069128ILVSLAPQLIK0000000000000
AK069128	Os02g0167700	Armadillo-like helical domain containing protein. (Os02t0167700-01)	136248	K-ATFEVVQLLK-N	000000000000	208	217	574.348	2	14.2451	0.00781412	9	Os02g0167700|AK069128ATFEVVQLLK000000000000
AK069128	Os02g0167700	Armadillo-like helical domain containing protein. (Os02t0167700-01)	136248	R-TNIQMIGALSR-S	0000030000000	228	238	610.33	2	5.07902	4.68007e-05	9	Os02g0167700|AK069128TNIQMIGALSR0000030000000
AK069128	Os02g0167700	Armadillo-like helical domain containing protein. (Os02t0167700-01)	136248	K-GQGDIDESSPR-W	0000000000000	406	416	580.762	2	-0.580985	5.65296e-06	9	Os02g0167700|AK069128GQGDIDESSPR0000000000000
AK069128	Os02g0167700	Armadillo-like helical domain containing protein. (Os02t0167700-01)	136248	K-IEALVFTR-L	0000000000	486	493	474.782	2	5.04635	0.0397781	9	Os02g0167700|AK069128IEALVFTR0000000000
AK069128	Os02g0167700	Armadillo-like helical domain containing protein. (Os02t0167700-01)	136248	K-SIQNVGLAVR-Y	000000000000	715	724	528.812	2	1.50428	0.00918692	9	Os02g0167700|AK069128SIQNVGLAVR000000000000
AK069128	Os02g0167700	Armadillo-like helical domain containing protein. (Os02t0167700-01)	136248	K-VLPQALILIR-S	000000000000	727	736	568.383	2	2.29017	0.0371639	9	Os02g0167700|AK069128VLPQALILIR000000000000
AK069128	Os02g0167700	Armadillo-like helical domain containing protein. (Os02t0167700-01)	136248	K-SAASYALGNIAVGNLSK-Y	0000000000000000000	867	883	818.437	2	-2.14719	4.3373e-05	9	Os02g0167700|AK069128SAASYALGNIAVGNLSK0000000000000000000
AK069128	Os02g0167700	Armadillo-like helical domain containing protein. (Os02t0167700-01)	136248	R-ISGNDYSMR-F	00000000300	1186	1194	529.733	2	0.644383	2.42288e-05	9	Os02g0167700|AK069128ISGNDYSMR00000000300
AK070041	Os02g0169300	Similar to Phosphoglycerate kinase, cytosolic (EC 2.7.2.3). (Os02t0169300-01)	42223.6	R-SVGTLGEADLR-G	0000000000000	6	16	559.296	2	0.311438	0.00022046	24	Os02g0169300|AK070041SVGTLGEADLR0000000000000
AK070041	Os02g0169300	Similar to Phosphoglycerate kinase, cytosolic (EC 2.7.2.3). (Os02t0169300-01)	42223.6	R-ADLNVPLDDAQK-I	00000000000000	24	35	649.834	2	1.00332	0.000882801	24	Os02g0169300|AK070041ADLNVPLDDAQK00000000000000
AK070041	Os02g0169300	Similar to Phosphoglycerate kinase, cytosolic (EC 2.7.2.3). (Os02t0169300-01)	42223.6	R-ADLNVPLDDAQKITDDTR-I	00000000000000000000	24	41	1000.5	2	-0.300048	0.0135182	24	Os02g0169300|AK070041ADLNVPLDDAQKITDDTR00000000000000000000
AK070041	Os02g0169300	Similar to Phosphoglycerate kinase, cytosolic (EC 2.7.2.3). (Os02t0169300-01)	42223.6	K-VILASHLGRPK-G	0000000000000	59	69	595.871	2	-1.35622	3.40361e-05	24	Os02g0169300|AK070041VILASHLGRPK0000000000000
AK070041	Os02g0169300	Similar to Phosphoglycerate kinase, cytosolic (EC 2.7.2.3). (Os02t0169300-01)	42223.6	K-YSLKPLVPR-L	00000000000	75	83	536.83	2	0.878518	0.00220049	24	Os02g0169300|AK070041YSLKPLVPR00000000000
AK070041	Os02g0169300	Similar to Phosphoglycerate kinase, cytosolic (EC 2.7.2.3). (Os02t0169300-01)	42223.6	K-LAAALPEGGVLLLENVR-F	0000000000000000000	106	122	868.009	2	-0.453961	1.77073e-05	24	Os02g0169300|AK070041LAAALPEGGVLLLENVR0000000000000000000
AK070041	Os02g0169300	Similar to Phosphoglycerate kinase, cytosolic (EC 2.7.2.3). (Os02t0169300-01)	42223.6	K-KLAAVADLYVNDAFGTAHR-A	000000000000000000000	137	155	678.025	3	-0.611163	3.49258e-08	24	Os02g0169300|AK070041KLAAVADLYVNDAFGTAHR000000000000000000000
AK070041	Os02g0169300	Similar to Phosphoglycerate kinase, cytosolic (EC 2.7.2.3). (Os02t0169300-01)	42223.6	K-LAAVADLYVNDAFGTAHR-A	00000000000000000000	138	155	635.325	3	-2.2572	7.87655e-05	24	Os02g0169300|AK070041LAAVADLYVNDAFGTAHR00000000000000000000
AK070041	Os02g0169300	Similar to Phosphoglycerate kinase, cytosolic (EC 2.7.2.3). (Os02t0169300-01)	42223.6	R-AHASTEGVTK-F	000000000000	156	165	500.755	2	-2.86191	0.00111313	24	Os02g0169300|AK070041AHASTEGVTK000000000000
AK070041	Os02g0169300	Similar to Phosphoglycerate kinase, cytosolic (EC 2.7.2.3). (Os02t0169300-01)	42223.6	K-FLKPAVAGFLMQK-E	000000000003000	166	178	733.414	2	-1.76738	0.00962965	24	Os02g0169300|AK070041FLKPAVAGFLMQK000000000003000
AK070041	Os02g0169300	Similar to Phosphoglycerate kinase, cytosolic (EC 2.7.2.3). (Os02t0169300-01)	42223.6	K-ELDYLVGAVANPK-K	000000000000000	179	191	694.873	2	-2.18644	2.85404e-07	24	Os02g0169300|AK070041ELDYLVGAVANPK000000000000000
AK070041	Os02g0169300	Similar to Phosphoglycerate kinase, cytosolic (EC 2.7.2.3). (Os02t0169300-01)	42223.6	K-KPFAAIVGGSK-V	0000000000000	192	202	537.818	2	-0.959493	0.000129304	24	Os02g0169300|AK070041KPFAAIVGGSK0000000000000
AK070041	Os02g0169300	Similar to Phosphoglycerate kinase, cytosolic (EC 2.7.2.3). (Os02t0169300-01)	42223.6	K-IGVIESLLAK-V	000000000000	207	216	521.829	2	0.60822	0.000247001	24	Os02g0169300|AK070041IGVIESLLAK000000000000
AK070041	Os02g0169300	Similar to Phosphoglycerate kinase, cytosolic (EC 2.7.2.3). (Os02t0169300-01)	42223.6	K-GVSLLLPTDVVVADK-F	00000000000000000	262	276	763.447	2	1.98834	0.019651	24	Os02g0169300|AK070041GVSLLLPTDVVVADK00000000000000000
AK070041	Os02g0169300	Similar to Phosphoglycerate kinase, cytosolic (EC 2.7.2.3). (Os02t0169300-01)	42223.6	K-FAAGTDAIAK-K	000000000000	332	341	482.758	2	-0.377248	0.00292397	24	Os02g0169300|AK070041FAAGTDAIAK000000000000
AK070041	Os02g0169300	Similar to Phosphoglycerate kinase, cytosolic (EC 2.7.2.3). (Os02t0169300-01)	42223.6	K-GATTIIGGGDSVAAVEK-A	0000000000000000000	351	367	773.41	2	1.1344	6.95652e-07	24	Os02g0169300|AK070041GATTIIGGGDSVAAVEK0000000000000000000
AK070041	Os02g0169300	Similar to Phosphoglycerate kinase, cytosolic (EC 2.7.2.3). (Os02t0169300-01)	42223.6	K-MSHISTGGGASLELLEGK-T	03000000000000000000	374	391	901.952	2	0.292372	2.09482e-05	24	Os02g0169300|AK070041MSHISTGGGASLELLEGK03000000000000000000
AK070041	Os02g0169300	Similar to Phosphoglycerate kinase, cytosolic (EC 2.7.2.3). (Os02t0169300-01)	42223.6	K-TLPGVLALDEA--	0000000000000	392	402	549.808	2	3.50026	0.00102574	24	Os02g0169300|AK070041TLPGVLALDEA0000000000000
AK065409	Os02g0169800	Armadillo-like helical domain containing protein. (Os02t0169800-01)	35331.8	K-ILVSLAPQLIK-G	0000000000000	94	104	597.895	2	0.341458	0.000521486	3	Os02g0169800|AK065409ILVSLAPQLIK0000000000000
AK065409	Os02g0169800	Armadillo-like helical domain containing protein. (Os02t0169800-01)	35331.8	K-ATFEVVQLLK-N	000000000000	178	187	574.348	2	14.2451	0.00781412	3	Os02g0169800|AK065409ATFEVVQLLK000000000000
AK065409	Os02g0169800	Armadillo-like helical domain containing protein. (Os02t0169800-01)	35331.8	R-TNIQMIGALSR-S	0000030000000	198	208	610.33	2	5.07902	4.68007e-05	3	Os02g0169800|AK065409TNIQMIGALSR0000030000000
AK070032	Os02g0171100	Similar to Glyceraldehyde-3-phosphate dehydrogenase (EC 1.2.1.12) (GAPDH). (Os02t0171100-01), Similar to glyceraldehyde-3-phosphate dehydrogenase, cytosolic. (Os02t0171100-02)	43503.3	R-GAAQNIIPSSTGAAK-A	00000000000000000	274	288	693.374	2	1.26011	0.0380219	1	Os02g0171100|AK070032GAAQNIIPSSTGAAK00000000000000000
Os02g0172600	Os02g0172600	Similar to heavy metal ATPase. (Os02t0172600-00)	111740	R-ARVVFDPALAK-C	0000000000000	89	99	593.856	2	9.55428	0.00857764	1	Os02g0172600|Os02g0172600ARVVFDPALAK0000000000000
AK070565	Os02g0173500	Similar to Cholinephosphate cytidylyltransferase. (Os02t0173500-01)	36262.6	R-TDGISTSDIIMR-I	00000000000300	175	186	662.825	2	0.719308	0.0179011	1	Os02g0173500|AK070565TDGISTSDIIMR00000000000300
AK060831	Os02g0173900	Similar to Succinate-semialdehyde dehydrogenase (EC 1.2.1.16). (Os02t0173900-01)	24219	R-MANDTNAGLAAYIFTK-S	030000000000000000	140	155	858.918	2	1.26755	8.38173e-10	1	Os02g0173900|AK060831MANDTNAGLAAYIFTK030000000000000000
AK067063	Os02g0175400	Similar to Vacuolar H(+)-ATPase subunit A (Fragment). (Os02t0175400-01)	68903.1	R-KVSGPVVVADGMGGAAMYELVR-V	000000000000300003000000	24	45	746.714	3	0.759195	3.39203e-05	19	Os02g0175400|AK067063KVSGPVVVADGMGGAAMYELVR000000000000300003000000
AK067063	Os02g0175400	Similar to Vacuolar H(+)-ATPase subunit A (Fragment). (Os02t0175400-01)	68903.1	K-VSGPVVVADGMGGAAMYELVR-V	00000000000300003000000	25	45	1055.52	2	1.87643	3.04138e-07	19	Os02g0175400|AK067063VSGPVVVADGMGGAAMYELVR00000000000300003000000
AK067063	Os02g0175400	Similar to Vacuolar H(+)-ATPase subunit A (Fragment). (Os02t0175400-01)	68903.1	K-SGDVYIPR-G	0000000000	114	121	453.736	2	-3.50747	0.00131886	19	Os02g0175400|AK067063SGDVYIPR0000000000
AK067063	Os02g0175400	Similar to Vacuolar H(+)-ATPase subunit A (Fragment). (Os02t0175400-01)	68903.1	K-LAADTPLLTGQR-V	00000000000000	221	232	628.354	2	0.791277	5.24435e-08	19	Os02g0175400|AK067063LAADTPLLTGQR00000000000000
AK067063	Os02g0175400	Similar to Vacuolar H(+)-ATPase subunit A (Fragment). (Os02t0175400-01)	68903.1	K-TVISQALSK-Y	00000000000	257	265	473.783	2	1.6681	0.00448761	19	Os02g0175400|AK067063TVISQALSK00000000000
AK067063	Os02g0175400	Similar to Vacuolar H(+)-ATPase subunit A (Fragment). (Os02t0175400-01)	68903.1	K-YSNSQAVVYVGCGER-G	00000000000000000	266	280	851.895	2	-1.36768	0.0130162	19	Os02g0175400|AK067063YSNSQAVVYVGCGER00000000000000000
AK067063	Os02g0175400	Similar to Vacuolar H(+)-ATPase subunit A (Fragment). (Os02t0175400-01)	68903.1	R-TTLVANTSNMPVAAR-E	00000000003000000	310	324	781.403	2	-0.419217	1.28332e-07	19	Os02g0175400|AK067063TTLVANTSNMPVAAR00000000003000000
AK067063	Os02g0175400	Similar to Vacuolar H(+)-ATPase subunit A (Fragment). (Os02t0175400-01)	68903.1	R-TTLVANTSNMPVAAR-E	00000000000000000	310	324	773.405	2	-1.34102	0.000319936	19	Os02g0175400|AK067063TTLVANTSNMPVAAR00000000000000000
AK067063	Os02g0175400	Similar to Vacuolar H(+)-ATPase subunit A (Fragment). (Os02t0175400-01)	68903.1	R-LAEMPADSGYPAYLAAR-L	0000300000000000000	366	382	906.443	2	8.2021	4.19591e-08	19	Os02g0175400|AK067063LAEMPADSGYPAYLAAR0000300000000000000
AK067063	Os02g0175400	Similar to Vacuolar H(+)-ATPase subunit A (Fragment). (Os02t0175400-01)	68903.1	R-LAEMPADSGYPAYLAAR-L	0000000000000000000	366	382	898.44	2	2.19301	0.00698189	19	Os02g0175400|AK067063LAEMPADSGYPAYLAAR0000000000000000000
AK067063	Os02g0175400	Similar to Vacuolar H(+)-ATPase subunit A (Fragment). (Os02t0175400-01)	68903.1	R-EVLQREDDLNEIVQLVGK-D	00000000000000000000	482	499	699.713	3	3.06541	0.00138494	19	Os02g0175400|AK067063EVLQREDDLNEIVQLVGK00000000000000000000
AK067063	Os02g0175400	Similar to Vacuolar H(+)-ATPase subunit A (Fragment). (Os02t0175400-01)	68903.1	K-DALAESDKITLETAK-L	00000000000000000	500	514	802.923	2	0.97272	5.4603e-07	19	Os02g0175400|AK067063DALAESDKITLETAK00000000000000000
AK067063	Os02g0175400	Similar to Vacuolar H(+)-ATPase subunit A (Fragment). (Os02t0175400-01)	68903.1	R-NIIHFNTLATQAVER-A	00000000000000000	544	558	576.315	3	3.71427	0.00740392	19	Os02g0175400|AK067063NIIHFNTLATQAVER00000000000000000
AK067063	Os02g0175400	Similar to Vacuolar H(+)-ATPase subunit A (Fragment). (Os02t0175400-01)	68903.1	R-MGDLFYR-L	000000000	576	582	451.215	2	-0.817075	2.51627e-05	19	Os02g0175400|AK067063MGDLFYR000000000
AK067063	Os02g0175400	Similar to Vacuolar H(+)-ATPase subunit A (Fragment). (Os02t0175400-01)	68903.1	R-MGDLFYR-L	030000000	576	582	459.213	2	0.0032593	7.74984e-05	19	Os02g0175400|AK067063MGDLFYR030000000
Os02g0176700	Os02g0176700	Similar to autoinhibited calcium ATPase. (Os02t0176700-00)	112981	R-MVTGDNLQTAR-A	0300000000000	669	679	611.297	2	-1.349	8.13425e-05	2	Os02g0176700|Os02g0176700MVTGDNLQTAR0300000000000
AK062715	Os02g0177500	Similar to Small nuclear ribonucleoprotein F (snRNP-F) (Sm protein F) (Sm-F) (SmF). (Os02t0177500-01)	9745.92	M-ATVPVNPKPFLNNLTGKPVIVK-L	100000000000000000000000	2	23	796.799	3	-7.40822	0.0118386	1	Os02g0177500|AK062715ATVPVNPKPFLNNLTGKPVIVK100000000000000000000000
AK063815	Os02g0178400	Protein transport protein SEC61 gamma subunit. (Os02t0178400-01)	7733.21	--MDAVDSVVDPLREFAK-D	130000000000000000	1	16	925.454	2	0.219653	0.00172937	1	Os02g0178400|AK063815MDAVDSVVDPLREFAK130000000000000000
AK069065	Os02g0179300	Similar to RAD23 protein, isoform II. (Os02t0179300-01), Similar to DNA repair protein RAD23-1. (Os02t0179300-02)	40160	R-AAYNNPER-A	0000000000	172	179	467.723	2	0.173874	0.00369044	1	Os02g0179300|AK069065AAYNNPER0000000000
AK121784	Os02g0181800	Similar to Ubiquitin fusion degradation 1-like. (Os02t0181800-01)	36338.1	K-LQPHTTDFLDISNPK-A	00000000000000000	124	138	575.965	3	-0.155987	0.0493586	1	Os02g0181800|AK121784LQPHTTDFLDISNPK00000000000000000
006-102-C09	Os02g0184200	Similar to Vacuolar proton pyrophosphatase. (Os02t0184200-01)	37261.5	R-TGAATNVIFGLALGYK-S	000000000000000000	36	51	798.444	2	1.16392	7.57386e-05	12	Os02g0184200|006-102-C09TGAATNVIFGLALGYK000000000000000000
006-102-C09	Os02g0184200	Similar to Vacuolar proton pyrophosphatase. (Os02t0184200-01)	37261.5	R-ERTDALDAAGNTTAAIGK-G	00000000000000000000	118	135	887.945	2	-5.87939	0.00025578	12	Os02g0184200|006-102-C09ERTDALDAAGNTTAAIGK00000000000000000000
006-102-C09	Os02g0184200	Similar to Vacuolar proton pyrophosphatase. (Os02t0184200-01)	37261.5	R-TDALDAAGNTTAAIGK-G	000000000000000000	120	135	745.379	2	0.776407	3.2353e-11	12	Os02g0184200|006-102-C09TDALDAAGNTTAAIGK000000000000000000
006-102-C09	Os02g0184200	Similar to Vacuolar proton pyrophosphatase. (Os02t0184200-01)	37261.5	K-MVEEVRR-Q	000000000	198	204	459.745	2	0.197503	0.0274784	12	Os02g0184200|006-102-C09MVEEVRR000000000
006-102-C09	Os02g0184200	Similar to Vacuolar proton pyrophosphatase. (Os02t0184200-01)	37261.5	K-KYIEAGASEHAR-T	00000000000000	289	300	666.339	2	0.0224771	9.21542e-06	12	Os02g0184200|006-102-C09KYIEAGASEHAR00000000000000
006-102-C09	Os02g0184200	Similar to Vacuolar proton pyrophosphatase. (Os02t0184200-01)	37261.5	K-YIEAGASEHAR-T	0000000000000	290	300	602.292	2	0.501409	1.21467e-06	12	Os02g0184200|006-102-C09YIEAGASEHAR0000000000000
006-102-C09	Os02g0184200	Similar to Vacuolar proton pyrophosphatase. (Os02t0184200-01)	37261.5	K-AAVIGDTIGDPLK-D	000000000000000	312	324	635.355	2	-2.20707	1.67193e-05	12	Os02g0184200|006-102-C09AAVIGDTIGDPLK000000000000000
006-102-C09	Os02g0184200	Similar to Vacuolar proton pyrophosphatase. (Os02t0184200-01)	37261.5	K-DTSGPSLNILIK-L	00000000000000	325	336	629.354	2	-3.08791	1.34099e-05	12	Os02g0184200|006-102-C09DTSGPSLNILIK00000000000000
AK100832	Os02g0184900	Cytochrome P450 family protein. (Os02t0184900-01)	57414	R-VVVASSADAAR-E	0000000000000	89	99	523.284	2	-3.03075	0.000824015	2	Os02g0184900|AK100832VVVASSADAAR0000000000000
AK100832	Os02g0184900	Cytochrome P450 family protein. (Os02t0184900-01)	57414	K-IAVVELLSAR-R	000000000000	143	152	535.832	2	0.211422	3.78016e-05	2	Os02g0184900|AK100832IAVVELLSAR000000000000
AK107034	Os02g0185200	Cytochrome P450 family protein. (Os02t0185200-01)	57250.3	R-VVVASSANAAR-E	0000000000000	89	99	522.793	2	-0.337914	3.26556e-05	6	Os02g0185200|AK107034VVVASSANAAR0000000000000
AK107034	Os02g0185200	Cytochrome P450 family protein. (Os02t0185200-01)	57250.3	K-IAVVELLSAR-R	000000000000	143	152	535.832	2	0.211422	3.78016e-05	6	Os02g0185200|AK107034IAVVELLSAR000000000000
AK107034	Os02g0185200	Cytochrome P450 family protein. (Os02t0185200-01)	57250.3	R-IREDEVGR-L	0000000000	160	167	487.256	2	-1.40498	0.00517692	6	Os02g0185200|AK107034IREDEVGR0000000000
AK107034	Os02g0185200	Cytochrome P450 family protein. (Os02t0185200-01)	57250.3	R-LVAAVAAAPAAQPVNVSER-I	000000000000000000000	168	186	917.513	2	-0.190524	0.00196015	6	Os02g0185200|AK107034LVAAVAAAPAAQPVNVSER000000000000000000000
AK107034	Os02g0185200	Cytochrome P450 family protein. (Os02t0185200-01)	57250.3	R-IAALISDSAVR-T	0000000000000	187	197	558.325	2	0.134088	2.49633e-06	6	Os02g0185200|AK107034IAALISDSAVR0000000000000
AK107034	Os02g0185200	Cytochrome P450 family protein. (Os02t0185200-01)	57250.3	K-ITSGFSLGDLFPSSR-L	00000000000000000	220	234	792.409	2	2.71925	0.00025436	6	Os02g0185200|AK107034ITSGFSLGDLFPSSR00000000000000000
AK061629	Os02g0192700	Similar to Thioredoxin peroxidase. (Os02t0192700-01), Similar to Thioredoxin peroxidase. (Os02t0192700-02)	23307.1	K-VLNLEEGGAFTTSSAEEMLK-A	0000000000000000003000	204	223	1071.52	2	-0.644741	0.000170426	1	Os02g0192700|AK061629VLNLEEGGAFTTSSAEEMLK0000000000000000003000
AF302906	Os02g0194100	Similar to Citrate synthase (EC 4.1.3.7). (Os02t0194100-01)	52480.3	K-VQLGNITVDMVLGGMR-G	000000000030000300	65	80	867.946	2	-2.16295	9.02019e-09	8	Os02g0194100|AF302906VQLGNITVDMVLGGMR000000000030000300
AF302906	Os02g0194100	Similar to Citrate synthase (EC 4.1.3.7). (Os02t0194100-01)	52480.3	R-LPAVASYVYR-R	000000000000	216	225	569.817	2	0.773442	0.000126537	8	Os02g0194100|AF302906LPAVASYVYR000000000000
AF302906	Os02g0194100	Similar to Citrate synthase (EC 4.1.3.7). (Os02t0194100-01)	52480.3	K-SVIGETGSDVTTDQLK-E	000000000000000000	320	335	825.415	2	0.185135	2.6436e-09	8	Os02g0194100|AF302906SVIGETGSDVTTDQLK000000000000000000
AF302906	Os02g0194100	Similar to Citrate synthase (EC 4.1.3.7). (Os02t0194100-01)	52480.3	K-VVPGFGHGVLR-K	0000000000000	347	357	569.331	2	1.38076	0.00893183	8	Os02g0194100|AF302906VVPGFGHGVLR0000000000000
AF302906	Os02g0194100	Similar to Citrate synthase (EC 4.1.3.7). (Os02t0194100-01)	52480.3	R-YYTVLFGVSR-S	000000000000	425	434	602.823	2	1.86559	6.78082e-05	8	Os02g0194100|AF302906YYTVLFGVSR000000000000
AF302906	Os02g0194100	Similar to Citrate synthase (EC 4.1.3.7). (Os02t0194100-01)	52480.3	R-SIGIGSQLIWDR-A	00000000000000	435	446	672.868	2	0.68707	0.000643099	8	Os02g0194100|AF302906SIGIGSQLIWDR00000000000000
AF302906	Os02g0194100	Similar to Citrate synthase (EC 4.1.3.7). (Os02t0194100-01)	52480.3	R-ALGLPLERPK-S	000000000000	447	456	547.341	2	1.66956	0.000983521	8	Os02g0194100|AF302906ALGLPLERPK000000000000
AK066028	Os02g0196300	Bacterial surface antigen (D15) family protein. (Os02t0196300-01)	55978.5	R-LQVSEAEVNNINIR-F	0000000000000000	89	102	799.929	2	0.400781	2.36046e-05	2	Os02g0196300|AK066028LQVSEAEVNNINIR0000000000000000
AK066028	Os02g0196300	Bacterial surface antigen (D15) family protein. (Os02t0196300-01)	55978.5	R-GYEEGAVGSGR-S	0000000000000	416	426	541.249	2	-0.321803	0.00168693	2	Os02g0196300|AK066028GYEEGAVGSGR0000000000000
AK070521	Os02g0196800	Similar to Fumarylacetoacetase (Fragment). (Os02t0196800-01), Similar to Fumarylacetoacetase. (Os02t0196800-02)	47784.9	K-ILSADEPVLR-D	000000000000	101	110	556.82	2	1.36691	0.0179847	1	Os02g0196800|AK070521ILSADEPVLR000000000000
AK068102	Os02g0197600	Chlorophyll a/b-binding protein type III (Fragment). (Os02t0197600-01), Similar to PSI type III chlorophyll a/b-binding protein. (Os02t0197600-02), Chlorophyll a/b-binding protein type III (Fragment). (Os02t0197600-03), Chlorophyll a/b-binding protein type III (Fragment). (Os02t0197600-04)	19563.3	R-FQDWYTPGSMGK-Q	00000000003000	77	88	716.813	2	-0.534255	2.75528e-05	4	Os02g0197600|AK068102FQDWYTPGSMGK00000000003000
AK068102	Os02g0197600	Chlorophyll a/b-binding protein type III (Fragment). (Os02t0197600-01), Similar to PSI type III chlorophyll a/b-binding protein. (Os02t0197600-02), Chlorophyll a/b-binding protein type III (Fragment). (Os02t0197600-03), Chlorophyll a/b-binding protein type III (Fragment). (Os02t0197600-04)	19563.3	K-QYFLGLEK-Y	0000000000	89	96	499.272	2	0.592669	0.014019	4	Os02g0197600|AK068102QYFLGLEK0000000000
AK068102	Os02g0197600	Chlorophyll a/b-binding protein type III (Fragment). (Os02t0197600-01), Similar to PSI type III chlorophyll a/b-binding protein. (Os02t0197600-02), Chlorophyll a/b-binding protein type III (Fragment). (Os02t0197600-03), Chlorophyll a/b-binding protein type III (Fragment). (Os02t0197600-04)	19563.3	K-YLAGSGEPAYPGGPLFNPLGFGTK-S	00000000000000000000000000	97	120	1205.61	2	-1.19839	0.00114416	4	Os02g0197600|AK068102YLAGSGEPAYPGGPLFNPLGFGTK00000000000000000000000000
AK067974	Os02g0198600	Similar to DNA-damage inducible protein DDI1-like. (Os02t0198600-01), Similar to predicted protein. (Os02t0198600-02)	45902.6	R-GVAIGVGQSEILGR-I	0000000000000000	242	255	678.387	2	1.31146	0.000105262	1	Os02g0198600|AK067974GVAIGVGQSEILGR0000000000000000
AK099357	Os02g0199900	Similar to 26S proteasome regulatory complex subunit p42D. (Os02t0199900-01), Similar to 26S protease regulatory subunit S10B. (Os02t0199900-02), Similar to 26S protease regulatory subunit S10B. (Os02t0199900-03)	44842.4	R-VVLDMTTLTIMR-T	00000300000300	105	116	712.88	2	2.18662	9.3147e-06	3	Os02g0199900|AK099357VVLDMTTLTIMR00000300000300
AK099357	Os02g0199900	Similar to 26S proteasome regulatory complex subunit p42D. (Os02t0199900-01), Similar to 26S protease regulatory subunit S10B. (Os02t0199900-02), Similar to 26S protease regulatory subunit S10B. (Os02t0199900-03)	44842.4	K-GVLLYGPPGTGK-T	00000000000000	176	187	579.83	2	0.549207	5.62935e-05	3	Os02g0199900|AK099357GVLLYGPPGTGK00000000000000
AK099357	Os02g0199900	Similar to 26S proteasome regulatory complex subunit p42D. (Os02t0199900-01), Similar to 26S protease regulatory subunit S10B. (Os02t0199900-02), Similar to 26S protease regulatory subunit S10B. (Os02t0199900-03)	44842.4	K-HGEIDYEAVVK-L	0000000000000	330	340	630.317	2	0.106126	0.000438289	3	Os02g0199900|AK099357HGEIDYEAVVK0000000000000
AK062327	Os02g0202500	Conserved hypothetical protein. (Os02t0202500-01)	7545.83	K-IMTSTVDVKDDSR-S	003000000000000	14	26	741.856	2	-4.33323	0.0220733	3	Os02g0202500|AK062327IMTSTVDVKDDSR003000000000000
AK062327	Os02g0202500	Conserved hypothetical protein. (Os02t0202500-01)	7545.83	K-FDELMAAAAEER-E	00000300000000	45	56	684.81	2	2.35923	2.25463e-09	3	Os02g0202500|AK062327FDELMAAAAEER00000300000000
AK062327	Os02g0202500	Conserved hypothetical protein. (Os02t0202500-01)	7545.83	R-EAAAAEAEAEEQS--	000000000000000	57	69	653.277	2	1.36791	0.0222547	3	Os02g0202500|AK062327EAAAAEAEAEEQS000000000000000
AK072940	Os02g0203700	Similar to Testis expressed sequence 13A protein. (Os02t0203700-01), Similar to Testis expressed sequence 13A protein. (Os02t0203700-02)	18343.1	R-GSGGGGDYANFGGR-G	0000000000000000	37	50	636.273	2	-1.24906	7.38173e-06	1	Os02g0203700|AK072940GSGGGGDYANFGGR0000000000000000
AK102286	Os02g0205300	Similar to TAT-binding protein homolog (Fragment). (Os02t0205300-01)	47334.8	K-VPDSTYDMIGGLDQQIK-E	0000000030000000000	160	176	948.457	2	0.660372	0.000158552	4	Os02g0205300|AK102286VPDSTYDMIGGLDQQIK0000000030000000000
AK102286	Os02g0205300	Similar to TAT-binding protein homolog (Fragment). (Os02t0205300-01)	47334.8	K-GVLLYGPPGTGK-T	00000000000000	202	213	579.83	2	0.549207	5.62935e-05	4	Os02g0205300|AK102286GVLLYGPPGTGK00000000000000
AK102286	Os02g0205300	Similar to TAT-binding protein homolog (Fragment). (Os02t0205300-01)	47334.8	R-MESGTGNGDSEVQR-T	0300000000000000	276	289	741.809	2	-1.6875	1.09441e-05	4	Os02g0205300|AK102286MESGTGNGDSEVQR0300000000000000
AK102286	Os02g0205300	Similar to TAT-binding protein homolog (Fragment). (Os02t0205300-01)	47334.8	R-TMLELLNQLDGFEASNK-I	0030000000000000000	290	306	969.981	2	3.76626	0.0084069	4	Os02g0205300|AK102286TMLELLNQLDGFEASNK0030000000000000000
J065137P13	Os02g0207900	Alpha/beta hydrolase family protein. (Os02t0207900-01)	40390.3	R-DRVLADMR-A	0000000000	334	341	488.259	2	6.12447	0.00258011	1	Os02g0207900|J065137P13DRVLADMR0000000000
011-077-C09	Os02g0208100	Similar to plastidic ATP/ADP-transporter. (Os02t0208100-01)	26903.8	K-GSSAEIIPFLK-T	0000000000000	111	121	581.329	2	-0.288493	0.029816	1	Os02g0208100|011-077-C09GSSAEIIPFLK0000000000000
J065213L11	Os02g0209000	Hypothetical conserved gene. (Os02t0209000-01)	21171.6	K-DTNTFASASLDR-T	00000000000000	154	165	649.306	2	1.77145	0.00845168	1	Os02g0209000|J065213L11DTNTFASASLDR00000000000000
AK099955	Os02g0209100	Similar to Coatomer beta' subunit (Beta'-coat protein) (Beta'-COP) (p102). (Os02t0209100-01)	70227.9	R-EVPVASMDSSGK-I	00000003000000	13	24	611.785	2	0.954645	0.000339651	2	Os02g0209100|AK099955EVPVASMDSSGK00000003000000
AK099955	Os02g0209100	Similar to Coatomer beta' subunit (Beta'-coat protein) (Beta'-COP) (p102). (Os02t0209100-01)	70227.9	K-HNEIQTVNIK-T	000000000000	30	39	598.323	2	-3.01836	3.72972e-05	2	Os02g0209100|AK099955HNEIQTVNIK000000000000
AK058267	Os02g0217500	Pre-mRNA cleavage complex II Clp1 family protein. (Os02t0217500-01)	47073.6	R-AAAAQGALPESSQGPR-V	000000000000000000	108	123	755.884	2	0.546973	0.0439845	1	Os02g0217500|AK058267AAAAQGALPESSQGPR000000000000000000
AK066996	Os02g0218200	Peptidase M1, membrane alanine aminopeptidase family protein. (Os02t0218200-01), Similar to APM1 (AMINOPEPTIDASE M1). (Os02t0218200-02)	99030.3	M-AAAEQSAEQFR-G	1000000000000	2	12	625.295	2	1.18713	0.000116665	9	Os02g0218200|AK066996AAAEQSAEQFR1000000000000
AK066996	Os02g0218200	Peptidase M1, membrane alanine aminopeptidase family protein. (Os02t0218200-01), Similar to APM1 (AMINOPEPTIDASE M1). (Os02t0218200-02)	99030.3	R-MLQSYLGAETFQK-S	030000000000000	408	420	766.379	2	3.61812	0.000403927	9	Os02g0218200|AK066996MLQSYLGAETFQK030000000000000
AK066996	Os02g0218200	Peptidase M1, membrane alanine aminopeptidase family protein. (Os02t0218200-01), Similar to APM1 (AMINOPEPTIDASE M1). (Os02t0218200-02)	99030.3	K-LNVNQTGFYR-V	000000000000	538	547	606.312	2	0.708851	7.51386e-05	9	Os02g0218200|AK066996LNVNQTGFYR000000000000
AK066996	Os02g0218200	Peptidase M1, membrane alanine aminopeptidase family protein. (Os02t0218200-01), Similar to APM1 (AMINOPEPTIDASE M1). (Os02t0218200-02)	99030.3	R-VSYDEELASR-L	000000000000	548	557	584.778	2	1.34179	2.09567e-06	9	Os02g0218200|AK066996VSYDEELASR000000000000
AK066996	Os02g0218200	Peptidase M1, membrane alanine aminopeptidase family protein. (Os02t0218200-01), Similar to APM1 (AMINOPEPTIDASE M1). (Os02t0218200-02)	99030.3	K-AAYVALMQTVNK-S	00000003000000	707	718	662.851	2	1.00473	2.08227e-05	9	Os02g0218200|AK066996AAYVALMQTVNK00000003000000
AK066996	Os02g0218200	Peptidase M1, membrane alanine aminopeptidase family protein. (Os02t0218200-01), Similar to APM1 (AMINOPEPTIDASE M1). (Os02t0218200-02)	99030.3	R-NQDSIFLLR-G	00000000000	770	778	553.303	2	-1.97994	0.000207612	9	Os02g0218200|AK066996NQDSIFLLR00000000000
AK066996	Os02g0218200	Peptidase M1, membrane alanine aminopeptidase family protein. (Os02t0218200-01), Similar to APM1 (AMINOPEPTIDASE M1). (Os02t0218200-02)	99030.3	R-TDEMGDDAEEFFK-S	000030000000000	821	833	775.308	2	5.90417	0.000282468	9	Os02g0218200|AK066996TDEMGDDAEEFFK000030000000000
AK061944	Os02g0220600	Similar to Elongation factor 1-gamma. (Os02t0220600-01), Elongation factor 1-gamma (EF-1-gamma) (eEF-1B gamma). (Os02t0220600-02)	47732.2	M-ALVLHTFDGNK-N	1000000000000	2	12	628.836	2	0.401687	0.00133748	7	Os02g0220600|AK061944ALVLHTFDGNK1000000000000
AK061944	Os02g0220600	Similar to Elongation factor 1-gamma. (Os02t0220600-01), Elongation factor 1-gamma (EF-1-gamma) (eEF-1B gamma). (Os02t0220600-02)	47732.2	K-ALIAAEYSGVK-V	0000000000000	17	27	561.314	2	-0.12893	5.25033e-05	7	Os02g0220600|AK061944ALIAAEYSGVK0000000000000
AK061944	Os02g0220600	Similar to Elongation factor 1-gamma. (Os02t0220600-01), Elongation factor 1-gamma (EF-1-gamma) (eEF-1B gamma). (Os02t0220600-02)	47732.2	K-NFQMGVSNK-T	00003000000	33	41	520.745	2	-0.813604	0.00769702	7	Os02g0220600|AK061944NFQMGVSNK00003000000
AK061944	Os02g0220600	Similar to Elongation factor 1-gamma. (Os02t0220600-01), Elongation factor 1-gamma (EF-1-gamma) (eEF-1B gamma). (Os02t0220600-02)	47732.2	K-VPILETPDGPVFESNAIAR-Y	000000000000000000000	54	72	1013.03	2	-1.8727	1.13359e-06	7	Os02g0220600|AK061944VPILETPDGPVFESNAIAR000000000000000000000
AK061944	Os02g0220600	Similar to Elongation factor 1-gamma. (Os02t0220600-01), Elongation factor 1-gamma (EF-1-gamma) (eEF-1B gamma). (Os02t0220600-02)	47732.2	K-NPLDLLPPSK-M	000000000000	260	269	547.317	2	1.5675	0.00162482	7	Os02g0220600|AK061944NPLDLLPPSK000000000000
AK061944	Os02g0220600	Similar to Elongation factor 1-gamma. (Os02t0220600-01), Elongation factor 1-gamma (EF-1-gamma) (eEF-1B gamma). (Os02t0220600-02)	47732.2	K-MLVIGSEPPFK-V	0300000000000	344	354	617.331	2	-0.43908	0.00165633	7	Os02g0220600|AK061944MLVIGSEPPFK0300000000000
AK100904	Os02g0221500	Nucleotide-binding, alpha-beta plait domain containing protein. (Os02t0221500-01)	40240.6	R-DGGDGGAYGDASGDDGRAPGGDSSGK-I	0000000000000000000000000000	42	67	766.643	3	0.776394	9.70848e-08	4	Os02g0221500|AK100904DGGDGGAYGDASGDDGRAPGGDSSGK0000000000000000000000000000
AK100904	Os02g0221500	Nucleotide-binding, alpha-beta plait domain containing protein. (Os02t0221500-01)	40240.6	K-VLEDEHVIDGR-T	0000000000000	123	133	641.326	2	1.14426	0.000177998	4	Os02g0221500|AK100904VLEDEHVIDGR0000000000000
AK100904	Os02g0221500	Nucleotide-binding, alpha-beta plait domain containing protein. (Os02t0221500-01)	40240.6	K-IVEHQIMLDHSTGR-S	0000000300000000	181	194	551.277	3	-2.88317	0.000442584	4	Os02g0221500|AK100904IVEHQIMLDHSTGR0000000300000000
AK100904	Os02g0221500	Nucleotide-binding, alpha-beta plait domain containing protein. (Os02t0221500-01)	40240.6	R-GFGFVTFESEDSVER-V	00000000000000000	197	211	853.389	2	0.0790031	0.000314819	4	Os02g0221500|AK100904GFGFVTFESEDSVER00000000000000000
AK121976	Os02g0226000	Similar to Peroxisomal membrane protein PMP22 (22 kDa peroxisomal membrane protein). (Os02t0226000-01)	23809.7	R-GRGEGEEGSLAR-R	00000000000000	15	26	609.296	2	-1.43945	0.00820871	1	Os02g0226000|AK121976GRGEGEEGSLAR00000000000000
AK120885	Os02g0227200	Early nodulin. (Os02t0227200-01)	10233.5	R-SPKEESDAAVHEAVTLGLK-N	000000000000000000000	10	28	661.012	3	-0.873589	0.00422107	1	Os02g0227200|AK120885SPKEESDAAVHEAVTLGLK000000000000000000000
AK121870	Os02g0228900	Similar to Auxin-responsive protein IAA18 (Indoleacetic acid-induced protein 18). (Os02t0228900-01)	32470.3	--MGEASESMKK-I	030000000000	1	10	557.245	2	-7.26641	0.0282998	1	Os02g0228900|AK121870MGEASESMKK030000000000
AK120755	Os02g0232400	Similar to Citrate synthase, glyoxysomal precursor (EC 2.3.3.1) (GCS). (Os02t0232400-01), Similar to Citrate synthase. (Os02t0232400-02)	59160.8	K-IYDPGYLNTAPVR-S	000000000000000	122	134	739.886	2	0.777439	1.75974e-07	4	Os02g0232400|AK120755IYDPGYLNTAPVR000000000000000
AK120755	Os02g0232400	Similar to Citrate synthase, glyoxysomal precursor (EC 2.3.3.1) (GCS). (Os02t0232400-01), Similar to Citrate synthase. (Os02t0232400-02)	59160.8	K-MLNEIGSVENIPDFIEGVK-N	030000000000000000000	362	380	1060.53	2	-0.149311	0.01467	4	Os02g0232400|AK120755MLNEIGSVENIPDFIEGVK030000000000000000000
AK120755	Os02g0232400	Similar to Citrate synthase, glyoxysomal precursor (EC 2.3.3.1) (GCS). (Os02t0232400-01), Similar to Citrate synthase. (Os02t0232400-02)	59160.8	K-AALSDDYFVK-R	000000000000	430	439	564.783	2	2.18013	0.00489438	4	Os02g0232400|AK120755AALSDDYFVK000000000000
AK120755	Os02g0232400	Similar to Citrate synthase, glyoxysomal precursor (EC 2.3.3.1) (GCS). (Os02t0232400-01), Similar to Citrate synthase. (Os02t0232400-02)	59160.8	R-VPASQGEQLGQIATSNATR-R	000000000000000000000	513	531	964.495	2	-0.371827	1.96917e-05	4	Os02g0232400|AK120755VPASQGEQLGQIATSNATR000000000000000000000
AK070679	Os02g0234800	Similar to U2 small nuclear ribonucleoprotein A' (U2 snRNP-A'). (Os02t0234800-01)	31979.7	R-LGTLLVNNNR-I	000000000000	66	75	557.323	2	1.66568	0.00172716	7	Os02g0234800|AK070679LGTLLVNNNR000000000000
AK070679	Os02g0234800	Similar to U2 small nuclear ribonucleoprotein A' (U2 snRNP-A'). (Os02t0234800-01)	31979.7	R-LTNLAEIDPLASLPK-L	00000000000000000	100	114	797.956	2	-0.793528	5.88578e-05	7	Os02g0234800|AK070679LTNLAEIDPLASLPK00000000000000000
AK070679	Os02g0234800	Similar to U2 small nuclear ribonucleoprotein A' (U2 snRNP-A'). (Os02t0234800-01)	31979.7	K-LQFLSLLDNTVTK-Q	000000000000000	115	127	746.425	2	0.659591	0.000849357	7	Os02g0234800|AK070679LQFLSLLDNTVTK000000000000000
AK070679	Os02g0234800	Similar to U2 small nuclear ribonucleoprotein A' (U2 snRNP-A'). (Os02t0234800-01)	31979.7	K-TFTPGQVVDAQDTTMEEQGPK-V	00000000000000030000000	178	198	1148.02	2	-1.09832	2.62331e-05	7	Os02g0234800|AK070679TFTPGQVVDAQDTTMEEQGPK00000000000000030000000
AK070679	Os02g0234800	Similar to U2 small nuclear ribonucleoprotein A' (U2 snRNP-A'). (Os02t0234800-01)	31979.7	K-VVAPTPEQITAIK-A	000000000000000	199	211	683.9	2	-0.29931	0.00291945	7	Os02g0234800|AK070679VVAPTPEQITAIK000000000000000
AK070679	Os02g0234800	Similar to U2 small nuclear ribonucleoprotein A' (U2 snRNP-A'). (Os02t0234800-01)	31979.7	K-AAIVNSQTLEEVAR-L	0000000000000000	212	225	750.904	2	-0.275298	2.33594e-05	7	Os02g0234800|AK070679AAIVNSQTLEEVAR0000000000000000
AK070679	Os02g0234800	Similar to U2 small nuclear ribonucleoprotein A' (U2 snRNP-A'). (Os02t0234800-01)	31979.7	K-KQNEESTPIEED--	00000000000000	273	284	709.817	2	-1.22534	0.0352161	7	Os02g0234800|AK070679KQNEESTPIEED00000000000000
AK120417	Os02g0235600	Similar to 60S ribosomal protein L11-2 (L16). Splice isoform 2. (Os02t0235600-01)	21036	K-VLEQLSGQTPVFSK-A	0000000000000000	38	51	766.92	2	0.438192	0.0090288	2	Os02g0235600|AK120417VLEQLSGQTPVFSK0000000000000000
AK120417	Os02g0235600	Similar to 60S ribosomal protein L11-2 (L16). Splice isoform 2. (Os02t0235600-01)	21036	K-AMQLLESGLK-V	003000000000	78	87	553.302	2	3.91388	0.000160418	2	Os02g0235600|AK120417AMQLLESGLK003000000000
AK070560	Os02g0236000	Similar to Aspartate aminotransferase (EC 2.6.1.1) (Fragment). (Os02t0236000-01)	48574.3	R-TFTYYHPESR-G	000000000000	178	187	650.8	2	-1.61551	0.00147716	2	Os02g0236000|AK070560TFTYYHPESR000000000000
AK070560	Os02g0236000	Similar to Aspartate aminotransferase (EC 2.6.1.1) (Fragment). (Os02t0236000-01)	48574.3	R-GLDFAGLMDDIK-N	00000000300000	188	199	655.819	2	0.38214	2.89982e-06	2	Os02g0236000|AK070560GLDFAGLMDDIK00000000300000
AK068881	Os02g0238500	Scramblase family protein. (Os02t0238500-01)	23327.9	R-FGDAGLNRK-F	00000000000	149	157	489.26	2	-4.25278	0.00792789	1	Os02g0238500|AK068881FGDAGLNRK00000000000
AK065425	Os02g0244700	Similar to Phosphoenolpyruvate carboxylase 1 (EC 4.1.1.31) (PEPCase 1) (CP21). (Os02t0244700-01), Similar to Phosphoenolpyruvate carboxylase 1 (EC 4.1.1.31) (PEPCase 1) (CP21). (Os02t0244700-02), Similar to Phosphoenolpyruvate carboxylase. (Os02t0244700-03), Similar to Phosphoenolpyruvate carboxylase. (Os02t0244700-04)	110716	R-TPPTPQDEMR-A	000000000300	232	241	594.272	2	1.28427	0.0273432	3	Os02g0244700|AK065425TPPTPQDEMR000000000300
AK065425	Os02g0244700	Similar to Phosphoenolpyruvate carboxylase 1 (EC 4.1.1.31) (PEPCase 1) (CP21). (Os02t0244700-01), Similar to Phosphoenolpyruvate carboxylase 1 (EC 4.1.1.31) (PEPCase 1) (CP21). (Os02t0244700-02), Similar to Phosphoenolpyruvate carboxylase. (Os02t0244700-03), Similar to Phosphoenolpyruvate carboxylase. (Os02t0244700-04)	110716	K-LADLEAAPAAVAR-L	000000000000000	566	578	634.354	2	0.131421	0.000496454	3	Os02g0244700|AK065425LADLEAAPAAVAR000000000000000
AK065425	Os02g0244700	Similar to Phosphoenolpyruvate carboxylase 1 (EC 4.1.1.31) (PEPCase 1) (CP21). (Os02t0244700-01), Similar to Phosphoenolpyruvate carboxylase 1 (EC 4.1.1.31) (PEPCase 1) (CP21). (Os02t0244700-02), Similar to Phosphoenolpyruvate carboxylase. (Os02t0244700-03), Similar to Phosphoenolpyruvate carboxylase. (Os02t0244700-04)	110716	R-ALMDEMAVVATK-E	00030030000000	713	724	655.821	2	0.704141	0.00013932	3	Os02g0244700|AK065425ALMDEMAVVATK00030030000000
AK119874	Os02g0245000	Ubiquitin domain containing protein. (Os02t0245000-01), Similar to predicted protein. (Os02t0245000-02)	87049.2	K-LAGDEEPPMR-I	000000000300	386	395	565.76	2	-1.13538	0.00741097	1	Os02g0245000|AK119874LAGDEEPPMR000000000300
009-136-E10	Os02g0246300	Prefoldin domain containing protein. (Os02t0246300-00)	15085.1	M-AAAAASSSTPAAVR-E	1000000000000000	2	15	636.831	2	-0.2775	5.64734e-05	2	Os02g0246300|009-136-E10AAAAASSSTPAAVR1000000000000000
009-136-E10	Os02g0246300	Prefoldin domain containing protein. (Os02t0246300-00)	15085.1	R-DLESQANALSK-I	0000000000000	20	30	588.297	2	-2.25605	0.0473453	2	Os02g0246300|009-136-E10DLESQANALSK0000000000000
AK069289	Os02g0255100	Down-regulated gene 11 in CW-type cytoplasmic male sterile rice (CW-CMS). (Os02t0255100-01), Similar to Catalytic/ protein phosphatase type 2C/ protein serine/threonine phosphatase. (Os02t0255100-02)	39288.8	K-LAISETYQK-T	00000000000	178	186	526.782	2	-5.24735	0.0270222	1	Os02g0255100|AK069289LAISETYQK00000000000
AK121248	Os02g0261100	Ubiquitin-conjugating enzyme OsUBC5b. (Os02t0261100-01)	16648.5	K-EQWSPALTISK-V	0000000000000	91	101	630.336	2	2.13592	0.00229813	1	Os02g0261100|AK121248EQWSPALTISK0000000000000
AK059921	Os02g0265900	Reticulon family protein. (Os02t0265900-01), Hypothetical conserved gene. (Os02t0265900-02), Reticulon family protein. (Os02t0265900-03), Similar to Reticulon. (Os02t0265900-04)	25201.8	K-SPPNIPEVK-I	00000000000	105	113	490.775	2	2.43908	0.0120411	1	Os02g0265900|AK059921SPPNIPEVK00000000000
AK073294	Os02g0274100	Similar to Peroxisomal fatty acid beta-oxidation multifunctional protein (MFP). (Os02t0274100-01), Similar to Peroxisomal fatty acid beta-oxidation multifunctional protein. (Os02t0274100-02)	79191.7	K-MIAANLEGLVK-R	0000000000000	351	361	579.828	2	-6.0852	0.0461642	1	Os02g0274100|AK073294MIAANLEGLVK0000000000000
AK073294	Os02g0274100	Similar to Peroxisomal fatty acid beta-oxidation multifunctional protein (MFP). (Os02t0274100-01), Similar to Peroxisomal fatty acid beta-oxidation multifunctional protein. (Os02t0274100-02)	79191.7	K-TSPQAILDLITVGK-M	0000000000000000	465	478	728.425	2	0.0863685	0.00656202	1	Os02g0274100|AK073294TSPQAILDLITVGK0000000000000000
J080089G04	Os02g0275100	Cytochrome C biogenesis protein family protein. (Os02t0275100-01)	17409.2	M-ATEEDVKQR-Q	10000000000	2	10	559.278	2	-0.414075	0.0294277	1	Os02g0275100|J080089G04ATEEDVKQR10000000000
AK121593	Os02g0284600	Similar to 60S ribosomal protein L27. (Os02t0284600-01)	15781.8	K-DVASGGPDALATR-D	000000000000000	93	105	615.311	2	2.01681	0.000773827	1	Os02g0284600|AK121593DVASGGPDALATR000000000000000
Os02g0288400	Os02g0288400	Similar to MRP-like ABC transporter. (Os02t0288400-00)	132889	K-STLIQALFR-I	00000000000	985	993	524.811	2	0.667529	8.38347e-06	1	Os02g0288400|Os02g0288400STLIQALFR00000000000
Os02g0288733	Os02g0288733	#N/A	123462	K-STLIQALFR-I	00000000000	894	902	524.811	2	0.667529	8.38347e-06	1	Os02g0288733|Os02g0288733STLIQALFR00000000000
AK100174	Os02g0301100	RAG1-activating protein 1 homologue domain containing protein. (Os02t0301100-01), RAG1-activating protein 1 homologue domain containing protein. (Os02t0301100-02)	28241.1	K-EADHVAMTDVVVDSAK-N	000000030000000000	228	243	851.901	2	-0.52233	8.73524e-05	3	Os02g0301100|AK100174EADHVAMTDVVVDSAK000000030000000000
AK100174	Os02g0301100	RAG1-activating protein 1 homologue domain containing protein. (Os02t0301100-01), RAG1-activating protein 1 homologue domain containing protein. (Os02t0301100-02)	28241.1	K-NNPSSGAAAAAANGR-Y	00000000000000000	244	258	664.818	2	-0.511395	2.21885e-08	3	Os02g0301100|AK100174NNPSSGAAAAAANGR00000000000000000
AF376055	Os02g0312600	Rac-like GTP-binding protein 7. (Os02t0312600-01)	22319.6	R-LRPLSYR-G	000000000	70	76	452.772	2	-0.593901	0.0489774	1	Os02g0312600|AF376055LRPLSYR000000000
AK073608	Os02g0313400	Apoptosis inhibitory 5 family protein. (Os02t0313400-01)	30247.7	K-TVAASSPYATAQDAR-Q	00000000000000000	30	44	754.87	2	-0.490158	7.31612e-09	1	Os02g0313400|AK073608TVAASSPYATAQDAR00000000000000000
AK120143	Os02g0313500	CHCH domain containing protein. (Os02t0313500-01)	12188.9	K-NNLESSASGPNEER--	0000000000000000	93	106	752.334	2	-4.16478	0.00373692	1	Os02g0313500|AK120143NNLESSASGPNEER0000000000000000
AK061254	Os02g0317400	Longin-like domain containing protein. (Os02t0317400-01), Similar to Coatomer subunit zeta-2. (Os02t0317400-02)	19997.3	K-NILLLDSEGKR-V	0000000000000	14	24	629.362	2	1.08746	0.00917195	2	Os02g0317400|AK061254NILLLDSEGKR0000000000000
AK061254	Os02g0317400	Longin-like domain containing protein. (Os02t0317400-01), Similar to Coatomer subunit zeta-2. (Os02t0317400-02)	19997.3	K-YFSDDWSSNASK-L	00000000000000	29	40	703.797	2	1.18827	0.0119882	2	Os02g0317400|AK061254YFSDDWSSNASK00000000000000
AK070852	Os02g0321800	B-cell receptor-associated 31-like family protein. (Os02t0321800-01), Similar to B-cell receptor-associated protein 31-like containing protein. (Os02t0321800-02)	25042.6	R-AGGDPESGGGGGGASLSPTDQVLFSR-H	0000000000000000000000000000	71	96	1188.56	2	0.506067	0.00014745	3	Os02g0321800|AK070852AGGDPESGGGGGGASLSPTDQVLFSR0000000000000000000000000000
AK070852	Os02g0321800	B-cell receptor-associated 31-like family protein. (Os02t0321800-01), Similar to B-cell receptor-associated protein 31-like containing protein. (Os02t0321800-02)	25042.6	K-TEEVHVAEDK-A	000000000000	177	186	578.778	2	-0.226808	9.57542e-05	3	Os02g0321800|AK070852TEEVHVAEDK000000000000
AK070852	Os02g0321800	B-cell receptor-associated 31-like family protein. (Os02t0321800-01), Similar to B-cell receptor-associated protein 31-like containing protein. (Os02t0321800-02)	25042.6	R-LLEDNQHLR-E	00000000000	204	212	569.305	2	1.43079	0.0135304	3	Os02g0321800|AK070852LLEDNQHLR00000000000
AK062103	Os02g0321900	Similar to Ribosomal protein L1. (Os02t0321900-01), Similar to 60S ribosomal protein L10a-1. (Os02t0321900-02)	24908.4	R-EAISQIANDSR-E	0000000000000	11	21	602.301	2	-1.53155	4.19919e-06	3	Os02g0321900|AK062103EAISQIANDSR0000000000000
AK062103	Os02g0321900	Similar to Ribosomal protein L1. (Os02t0321900-01), Similar to 60S ribosomal protein L10a-1. (Os02t0321900-02)	24908.4	K-KYHAFLASEAIIK-Q	000000000000000	105	117	497.617	3	0.807553	0.0192232	3	Os02g0321900|AK062103KYHAFLASEAIIK000000000000000
AK062103	Os02g0321900	Similar to Ribosomal protein L1. (Os02t0321900-01), Similar to 60S ribosomal protein L10a-1. (Os02t0321900-02)	24908.4	K-FPTLVTHQESLESK-V	0000000000000000	133	146	539.281	3	-2.32653	0.0155695	3	Os02g0321900|AK062103FPTLVTHQESLESK0000000000000000
AK071476	Os02g0325100	Similar to 26S protease regulatory subunit 6B (MIP224) (MB67 interacting protein) (TAT-binding protein-7) (TBP-7). (Os02t0325100-01), Similar to 26S proteasome regulatory particle triple-A ATPase subunit3 (Fragment). (Os02t0325100-02)	46639.1	R-GVLLYGPPGTGK-T	00000000000000	202	213	579.83	2	0.549207	5.62935e-05	1	Os02g0325100|AK071476GVLLYGPPGTGK00000000000000
AK071476	Os02g0325100	Similar to 26S protease regulatory subunit 6B (MIP224) (MB67 interacting protein) (TAT-binding protein-7) (TBP-7). (Os02t0325100-01), Similar to 26S proteasome regulatory particle triple-A ATPase subunit3 (Fragment). (Os02t0325100-02)	46639.1	R-VVGSEFVQK-Y	00000000000	231	239	496.774	2	0.410822	0.00355233	1	Os02g0325100|AK071476VVGSEFVQK00000000000
AK067672	Os02g0332200	Similar to T-complex protein 1 delta subunit. (Os02t0332200-01), Similar to T-complex protein 1, delta subunit. (Os02t0332200-02)	58208.9	M-ATAVAASPAQSR-K	10000000000000	2	13	586.305	2	-3.17207	0.00168786	4	Os02g0332200|AK067672ATAVAASPAQSR10000000000000
AK067672	Os02g0332200	Similar to T-complex protein 1 delta subunit. (Os02t0332200-01), Similar to T-complex protein 1, delta subunit. (Os02t0332200-02)	58208.9	R-MSLLQPAAR-M	03000000000	75	83	501.773	2	-1.06209	0.00927794	4	Os02g0332200|AK067672MSLLQPAAR03000000000
AK067672	Os02g0332200	Similar to T-complex protein 1 delta subunit. (Os02t0332200-01), Similar to T-complex protein 1, delta subunit. (Os02t0332200-02)	58208.9	R-SQDAAAGDGTTTVVVLAGSLLR-R	000000000000000000000000	91	112	1051.56	2	1.22367	0.00110869	4	Os02g0332200|AK067672SQDAAAGDGTTTVVVLAGSLLR000000000000000000000000
AK067672	Os02g0332200	Similar to T-complex protein 1 delta subunit. (Os02t0332200-01), Similar to T-complex protein 1, delta subunit. (Os02t0332200-02)	58208.9	K-LGGTVDDTELIR-G	00000000000000	208	219	644.84	2	-0.731596	7.55041e-06	4	Os02g0332200|AK067672LGGTVDDTELIR00000000000000
AK071402	Os02g0461000	FAS1 domain domain containing protein. (Os02t0461000-01)	22421	K-SASLLVLQDK-A	000000000000	59	68	537.315	2	1.54183	0.00258482	2	Os02g0461000|AK071402SASLLVLQDK000000000000
AK071402	Os02g0461000	FAS1 domain domain containing protein. (Os02t0461000-01)	22421	R-TAMLPTLLSNTDKK-L	0003000000000000	106	119	516.949	3	1.188	0.00591709	2	Os02g0461000|AK071402TAMLPTLLSNTDKK0003000000000000
AK071402	Os02g0461000	FAS1 domain domain containing protein. (Os02t0461000-01)	22421	K-SSDADEAAAKPATEPK-A	000000000000000000	192	207	529.922	3	1.25377	0.00935813	2	Os02g0461000|AK071402SSDADEAAAKPATEPK000000000000000000
Os02g0464500	Os02g0464500	Hypothetical conserved gene. (Os02t0464500-00)	103043	R-LIEELER-S	000000000	334	340	451.253	2	-0.862335	0.0253247	1	Os02g0464500|Os02g0464500LIEELER000000000
AK100199	Os02g0465400	Similar to 7-dehydrocholesterol reductase (EC 1.3.1.21) (7-DHC reductase) (Sterol delta-7-reductase) (Dwarf5 protein). (Os02t0465400-01)	51910.3	R-FEGPVSPSGNVPVYK-A	00000000000000000	107	121	788.905	2	1.15709	0.00140703	2	Os02g0465400|AK100199FEGPVSPSGNVPVYK00000000000000000
AK100199	Os02g0465400	Similar to 7-dehydrocholesterol reductase (EC 1.3.1.21) (7-DHC reductase) (Sterol delta-7-reductase) (Dwarf5 protein). (Os02t0465400-01)	51910.3	K-IVASYQTTNGETK-S	000000000000000	353	365	706.356	2	-1.55366	0.0318749	2	Os02g0465400|AK100199IVASYQTTNGETK000000000000000
AK120602	Os02g0470000	Pentatricopeptide repeat domain containing protein. (Os02t0470000-01)	73405.9	R-LAAASSRWANR-R	0000000000000	31	41	601.817	2	-9.71509	0.0441986	1	Os02g0470000|AK120602LAAASSRWANR0000000000000
AK065460	Os02g0473000	Riboflavin biosynthesis protein RibD family protein. (Os02t0473000-01), Similar to cDNA clone:J013024H13, full insert sequence. (Os02t0473000-02)	54596.9	R-EGEGMNYLGR-L	000003000000	458	467	571.242	2	-14.4395	0.0432996	1	Os02g0473000|AK065460EGEGMNYLGR000003000000
AK068629	Os02g0474700	Armadillo-like helical domain containing protein. (Os02t0474700-01)	77855.3	R-TAAMDFVSELVR-K	00003000000000	34	45	677.839	2	2.723	7.75201e-05	1	Os02g0474700|AK068629TAAMDFVSELVR00003000000000
AK119795	Os02g0478600	Similar to 40S ribosomal protein S15A. (Os02t0478600-01)	14879.9	R-VSVLNDALK-T	00000000000	4	12	479.782	2	0.940118	0.00020915	1	Os02g0478600|AK119795VSVLNDALK00000000000
AK099723	Os02g0478700	Ribosomal protein S27. (Os02t0478700-01)	9948.03	M-VLSNDIDLLNPPAELEK-L	0000000000000000000	2	18	940.504	2	-0.686131	0.0109199	2	Os02g0478700|AK099723VLSNDIDLLNPPAELEK0000000000000000000
Os02g0489800	Os02g0489800	Similar to SKIP interacting protein 18 (Fragment). (Os02t0489800-00)	118388	R-IQEELER-Y	000000000	723	729	458.737	2	-7.5879	0.0353774	1	Os02g0489800|Os02g0489800IQEELER000000000
AK059542	Os02g0496900	Mitochondrial import receptor, TOM9-2 subunit, plant domain containing protein. (Os02t0496900-01)	9659.17	R-GGGGGEGEGILASFSR-S	000000000000000000	8	23	725.85	2	0.562696	2.20379e-07	1	Os02g0496900|AK059542GGGGGEGEGILASFSR000000000000000000
AK100163	Os02g0503900	Cytochrome P450 family protein. (Os02t0503900-01)	58988.4	R-HGAAVMGLR-F	00000030000	69	77	464.246	2	1.19505	0.000978209	3	Os02g0503900|AK100163HGAAVMGLR00000030000
AK100163	Os02g0503900	Cytochrome P450 family protein. (Os02t0503900-01)	58988.4	R-VQHFADVNVR-E	000000000000	148	157	592.812	2	0.328382	0.0161554	3	Os02g0503900|AK100163VQHFADVNVR000000000000
AK100163	Os02g0503900	Cytochrome P450 family protein. (Os02t0503900-01)	58988.4	R-TFYGADDDEVSEEAR-W	00000000000000000	204	218	852.353	2	-2.18137	4.26283e-05	3	Os02g0503900|AK100163TFYGADDDEVSEEAR00000000000000000
J100032E10	Os02g0508000	Trimeric LpxA-like domain containing protein. (Os02t0508000-01)	17706.1	R-RIPTGELWAGNPAR-F	0000000000000000	89	102	769.416	2	0.585392	0.0044745	5	Os02g0508000|J100032E10RIPTGELWAGNPAR0000000000000000
J100032E10	Os02g0508000	Trimeric LpxA-like domain containing protein. (Os02t0508000-01)	17706.1	R-IPTGELWAGNPAR-F	000000000000000	90	102	691.365	2	0.582778	0.000137951	5	Os02g0508000|J100032E10IPTGELWAGNPAR000000000000000
J100032E10	Os02g0508000	Trimeric LpxA-like domain containing protein. (Os02t0508000-01)	17706.1	R-KLTNEEIMEIPK-L	00000000300000	106	117	730.889	2	2.29677	0.018939	5	Os02g0508000|J100032E10KLTNEEIMEIPK00000000300000
J100032E10	Os02g0508000	Trimeric LpxA-like domain containing protein. (Os02t0508000-01)	17706.1	K-LTNEEIMEIPK-L	0000000300000	107	117	666.84	2	0.582468	1.45536e-05	5	Os02g0508000|J100032E10LTNEEIMEIPK0000000300000
AK122107	Os02g0510100	Similar to U6 snRNA-associated Sm-like protein LSm6 (Sm protein F). (Os02t0510100-01), Similar to U6 snRNA-associated Sm-like protein LSm6 (Sm protein F). (Os02t0510100-02)	10070.1	K-LNSGVDYR-G	0000000000	36	43	462.232	2	-2.49115	5.85516e-06	3	Os02g0510100|AK122107LNSGVDYR0000000000
AK122107	Os02g0510100	Similar to U6 snRNA-associated Sm-like protein LSm6 (Sm protein F). (Os02t0510100-01), Similar to U6 snRNA-associated Sm-like protein LSm6 (Sm protein F). (Os02t0510100-02)	10070.1	R-GNNVLYISTSK-R	0000000000000	79	89	598.322	2	3.61487	0.0226746	3	Os02g0510100|AK122107GNNVLYISTSK0000000000000
AK100313	Os02g0519900	Similar to Elongation factor EF-2 (Fragment). (Os02t0519900-01), Similar to H0613H07.5 protein. (Os02t0519900-02), Similar to H0613H07.5 protein. (Os02t0519900-03), Similar to H0613H07.5 protein. (Os02t0519900-04), Similar to H0613H07.5 protein. (Os02t0519900-05)	95239.2	K-STGISLFYEMSDESLK-L	000000000030000000	72	87	911.923	2	-1.49025	0.0246787	1	Os02g0519900|AK100313STGISLFYEMSDESLK000000000030000000
AK100313	Os02g0519900	Similar to Elongation factor EF-2 (Fragment). (Os02t0519900-01), Similar to H0613H07.5 protein. (Os02t0519900-02), Similar to H0613H07.5 protein. (Os02t0519900-03), Similar to H0613H07.5 protein. (Os02t0519900-04), Similar to H0613H07.5 protein. (Os02t0519900-05)	95239.2	R-GGGQVIPTAR-R	000000000000	702	711	478.269	2	-0.439203	0.0272535	1	Os02g0519900|AK100313GGGQVIPTAR000000000000
AK102815	Os02g0520800	Similar to Ubiquinol-cytochrome c reductase iron-sulfur subunit, mitochondrial precursor (EC 1.10.2.2) (Rieske iron-sulfur protein) (RISP). (Os02t0520800-01)	30085.6	R-NQDVSLTELPATVSAVK-N	0000000000000000000	69	85	886.479	2	3.93696	2.864e-08	8	Os02g0520800|AK102815NQDVSLTELPATVSAVK0000000000000000000
AK102815	Os02g0520800	Similar to Ubiquinol-cytochrome c reductase iron-sulfur subunit, mitochondrial precursor (EC 1.10.2.2) (Rieske iron-sulfur protein) (RISP). (Os02t0520800-01)	30085.6	R-NQDVSLTELPATVSAVKNPSAK-I	000000000000000000000000	69	90	757.074	3	1.74168	0.000241992	8	Os02g0520800|AK102815NQDVSLTELPATVSAVKNPSAK000000000000000000000000
AK102815	Os02g0520800	Similar to Ubiquinol-cytochrome c reductase iron-sulfur subunit, mitochondrial precursor (EC 1.10.2.2) (Rieske iron-sulfur protein) (RISP). (Os02t0520800-01)	30085.6	K-IVYDEYNHER-Y	000000000000	91	100	669.309	2	-0.480369	4.30756e-05	8	Os02g0520800|AK102815IVYDEYNHER000000000000
AK102815	Os02g0520800	Similar to Ubiquinol-cytochrome c reductase iron-sulfur subunit, mitochondrial precursor (EC 1.10.2.2) (Rieske iron-sulfur protein) (RISP). (Os02t0520800-01)	30085.6	R-AFAYFVLSGGR-F	0000000000000	110	120	594.316	2	3.90795	7.88303e-07	8	Os02g0520800|AK102815AFAYFVLSGGR0000000000000
AK102815	Os02g0520800	Similar to Ubiquinol-cytochrome c reductase iron-sulfur subunit, mitochondrial precursor (EC 1.10.2.2) (Rieske iron-sulfur protein) (RISP). (Os02t0520800-01)	30085.6	R-FIYASLLR-L	0000000000	121	128	491.788	2	-3.28736	0.0182019	8	Os02g0520800|AK102815FIYASLLR0000000000
AK102815	Os02g0520800	Similar to Ubiquinol-cytochrome c reductase iron-sulfur subunit, mitochondrial precursor (EC 1.10.2.2) (Rieske iron-sulfur protein) (RISP). (Os02t0520800-01)	30085.6	K-FVLSMSASK-D	00000300000	134	142	493.255	2	1.00958	0.0170378	8	Os02g0520800|AK102815FVLSMSASK00000300000
AK102815	Os02g0520800	Similar to Ubiquinol-cytochrome c reductase iron-sulfur subunit, mitochondrial precursor (EC 1.10.2.2) (Rieske iron-sulfur protein) (RISP). (Os02t0520800-01)	30085.6	R-RTEEDINLANSVDIGSLRDPQQDAER-V	0000000000000000000000000000	177	202	736.114	4	3.53198	0.00234559	8	Os02g0520800|AK102815RTEEDINLANSVDIGSLRDPQQDAER0000000000000000000000000000
AK067722	Os02g0526500	Sterile alpha motif SAM domain containing protein. (Os02t0526500-01)	10198.6	K-FSKPQSEDLYYSR-A	000000000000000	14	26	540.595	3	0.117552	0.0200152	2	Os02g0526500|AK067722FSKPQSEDLYYSR000000000000000
AK067722	Os02g0526500	Sterile alpha motif SAM domain containing protein. (Os02t0526500-01)	10198.6	K-GLLTDQTLPLLTDSALR-D	0000000000000000000	46	62	914.015	2	0.43988	0.0229468	2	Os02g0526500|AK067722GLLTDQTLPLLTDSALR0000000000000000000
AK063708	Os02g0530300	Zinc finger, AN1-type domain containing protein. (Os02t0530300-01)	17027.2	R-CASCRKR-V	000000000	94	100	483.249	2	14.8227	0.00716349	1	Os02g0530300|AK063708CASCRKR000000000
AK061527	Os02g0532300	Hypothetical conserved gene. (Os02t0532300-01), Alpha/beta hydrolase fold-1 domain containing protein. (Os02t0532300-02)	41596.1	R-HLAYHEYGVPKDQAK-H	00000000000000000	81	95	585.966	3	0.930763	0.00889422	2	Os02g0532300|AK061527HLAYHEYGVPKDQAK00000000000000000
AK061527	Os02g0532300	Hypothetical conserved gene. (Os02t0532300-01), Alpha/beta hydrolase fold-1 domain containing protein. (Os02t0532300-02)	41596.1	K-LFPASSVISFNPAILSR-E	0000000000000000000	243	259	910.01	2	1.16134	8.75661e-05	2	Os02g0532300|AK061527LFPASSVISFNPAILSR0000000000000000000
AK121892	Os02g0533900	Similar to Carbon-nitrogen hydrolase family protein. (Os02t0533900-01), Similar to Carbon-nitrogen hydrolase family protein. (Os02t0533900-02)	33725.9	K-FYFNPGDTGFK-A	0000000000000	136	146	646.802	2	1.52128	0.000517805	2	Os02g0533900|AK121892FYFNPGDTGFK0000000000000
AK121892	Os02g0533900	Similar to Carbon-nitrogen hydrolase family protein. (Os02t0533900-01), Similar to Carbon-nitrogen hydrolase family protein. (Os02t0533900-02)	33725.9	K-VLLTLDGEKS--	000000000000	292	301	537.805	2	-1.41422	0.0075033	2	Os02g0533900|AK121892VLLTLDGEKS000000000000
AK101459	Os02g0534800	Similar to 40S ribosomal protein S14 (Clone MCH2). (Os02t0534800-01)	16480.7	K-TPGPGAQSALR-A	0000000000000	107	117	527.784	2	-3.5496	0.000196763	1	Os02g0534800|AK101459TPGPGAQSALR0000000000000
AK068919	Os02g0537700	Similar to 2-cys peroxiredoxin BAS1, chloroplast precursor (EC 1.11.1.15) (Thiol- specific antioxidant protein) (Fragment). (Os02t0537700-01)	28363.5	R-AGGVDDAPLVGNK-A	000000000000000	61	73	606.816	2	1.5827	6.40044e-05	1	Os02g0537700|AK068919AGGVDDAPLVGNK000000000000000
AK070310	Os02g0537900	Similar to Vacuolar-type H+-translocating inorganic pyrophosphatase (EC 3.6.1.1). (Os02t0537900-01)	85295.5	K-AADVGADLVGK-V	0000000000000	271	281	508.277	2	3.89959	2.52751e-06	4	Os02g0537900|AK070310AADVGADLVGK0000000000000
AK070310	Os02g0537900	Similar to Vacuolar-type H+-translocating inorganic pyrophosphatase (EC 3.6.1.1). (Os02t0537900-01)	85295.5	K-VEQGIPEDDPR-N	0000000000000	282	292	627.8	2	-2.57869	0.0393031	4	Os02g0537900|AK070310VEQGIPEDDPR0000000000000
AK070310	Os02g0537900	Similar to Vacuolar-type H+-translocating inorganic pyrophosphatase (EC 3.6.1.1). (Os02t0537900-01)	85295.5	R-EITDILDAVGNTTK-A	0000000000000000	555	568	745.392	2	1.41814	0.00329957	4	Os02g0537900|AK070310EITDILDAVGNTTK0000000000000000
AK120450	Os02g0541700	Similar to Ubiquinol-cytochrome c reductase complex 7.8 kDa protein (EC 1.10.2.2) (Mitochondrial hinge protein) (CR7). (Os02t0541700-01), Similar to Ubiquinol-cytochrome c reductase complex 7.8 kDa protein (EC 1.10.2.2) (Mitochondrial hinge protein) (CR7). (Os02t0541700-02)	8542.04	--MSDEEVSDPK-A	030000000000	1	10	576.739	2	-0.983994	0.0363454	3	Os02g0541700|AK120450MSDEEVSDPK030000000000
AK120450	Os02g0541700	Similar to Ubiquinol-cytochrome c reductase complex 7.8 kDa protein (EC 1.10.2.2) (Mitochondrial hinge protein) (CR7). (Os02t0541700-01), Similar to Ubiquinol-cytochrome c reductase complex 7.8 kDa protein (EC 1.10.2.2) (Mitochondrial hinge protein) (CR7). (Os02t0541700-02)	8542.04	M-SDEEVSDPK-A	10000000000	2	10	524.226	2	-2.18569	0.00482221	3	Os02g0541700|AK120450SDEEVSDPK10000000000
AK066564	Os02g0549600	Similar to 40S ribosomal protein S10-1. (Os02t0549600-01)	20321.2	K-GGAPAEFQPSFR-S	00000000000000	146	157	632.309	2	-1.08713	0.0021828	1	Os02g0549600|AK066564GGAPAEFQPSFR00000000000000
AK072440	Os02g0553600	Similar to RNA polymerase II transcriptional coactivator KIWI. (Os02t0553600-01)	11270.9	R-AAGDDGPSESADDDIVVAQISK-N	000000000000000000000000	21	42	1080.5	2	-1.31992	6.12669e-07	1	Os02g0553600|AK072440AAGDDGPSESADDDIVVAQISK000000000000000000000000
AK101886	Os02g0554300	Similar to SAC1-like protein AtSAC1b (SAC domain protein 6). (Os02t0554300-01)	68399	K-GFTASYVQVR-G	000000000000	257	266	564.295	2	-0.645671	0.0111074	1	Os02g0554300|AK101886GFTASYVQVR000000000000
AK101886	Os02g0554300	Similar to SAC1-like protein AtSAC1b (SAC domain protein 6). (Os02t0554300-01)	68399	K-SIEPILSEDIR-Y	0000000000000	333	343	636.345	2	-0.863728	0.0151897	1	Os02g0554300|AK101886SIEPILSEDIR0000000000000
AK103125	Os02g0556100	NAD(P)-binding domain containing protein. (Os02t0556100-01)	31328.5	K-RVEEPFKVEEAETVK-V	00000000000000000	43	57	597.316	3	-0.316997	0.0441793	6	Os02g0556100|AK103125RVEEPFKVEEAETVK00000000000000000
AK103125	Os02g0556100	NAD(P)-binding domain containing protein. (Os02t0556100-01)	31328.5	K-RVEEPFKVEEAETVKVPPPSPDK-L	0000000000000000000000000	43	65	652.598	4	1.74991	0.00098213	6	Os02g0556100|AK103125RVEEPFKVEEAETVKVPPPSPDK0000000000000000000000000
AK103125	Os02g0556100	NAD(P)-binding domain containing protein. (Os02t0556100-01)	31328.5	K-GFTVASLNR-S	00000000000	87	95	482.765	2	1.95236	0.000558673	6	Os02g0556100|AK103125GFTVASLNR00000000000
AK103125	Os02g0556100	NAD(P)-binding domain containing protein. (Os02t0556100-01)	31328.5	K-INGTANINAISVAAEK-G	000000000000000000	148	163	793.431	2	0.803082	7.8626e-11	6	Os02g0556100|AK103125INGTANINAISVAAEK000000000000000000
AK103125	Os02g0556100	NAD(P)-binding domain containing protein. (Os02t0556100-01)	31328.5	R-ATEAELLSK-F	00000000000	192	200	481.263	2	-0.573329	0.0440952	6	Os02g0556100|AK103125ATEAELLSK00000000000
AK103125	Os02g0556100	NAD(P)-binding domain containing protein. (Os02t0556100-01)	31328.5	R-LPLVGPLLTPPVSVASVAK-V	000000000000000000000	246	264	929.573	2	-1.3959	0.000135842	6	Os02g0556100|AK103125LPLVGPLLTPPVSVASVAK000000000000000000000
AK066353	Os02g0558100	Similar to C1C-Nt1 protein. (Os02t0558100-01), Chloride channel (Fragment). (Os02t0558100-02), Similar to Chloride channel (Fragment). (Os02t0558100-03)	71933.4	K-GVYDQIVVMK-G	000000000300	443	452	584.308	2	0.728666	0.00512	2	Os02g0558100|AK066353GVYDQIVVMK000000000300
AK066353	Os02g0558100	Similar to C1C-Nt1 protein. (Os02t0558100-01), Chloride channel (Fragment). (Os02t0558100-02), Similar to Chloride channel (Fragment). (Os02t0558100-03)	71933.4	K-VGNIVHALR-F	00000000000	487	495	489.795	2	-0.788503	0.000597165	2	Os02g0558100|AK066353VGNIVHALR00000000000
AK071800	Os02g0562700	Similar to Gamma hydroxybutyrate dehydrogenase (EC 1.1.1.61). (Os02t0562700-01), Similar to Gamma hydroxybutyrate dehydrogenase (EC 1.1.1.61). (Os02t0562700-02)	30689.8	--MEVGFLGLGIMGK-A	130000000003000	1	13	713.361	2	2.18864	0.000163311	3	Os02g0562700|AK071800MEVGFLGLGIMGK130000000003000
AK071800	Os02g0562700	Similar to Gamma hydroxybutyrate dehydrogenase (EC 1.1.1.61). (Os02t0562700-01), Similar to Gamma hydroxybutyrate dehydrogenase (EC 1.1.1.61). (Os02t0562700-02)	30689.8	K-DGVLEQIGEGK-G	0000000000000	78	88	572.795	2	-1.73927	0.00583349	3	Os02g0562700|AK071800DGVLEQIGEGK0000000000000
AK071800	Os02g0562700	Similar to Gamma hydroxybutyrate dehydrogenase (EC 1.1.1.61). (Os02t0562700-01), Similar to Gamma hydroxybutyrate dehydrogenase (EC 1.1.1.61). (Os02t0562700-02)	30689.8	K-GGAFVEAPVSGSK-K	000000000000000	112	124	603.312	2	0.445128	0.00141602	3	Os02g0562700|AK071800GGAFVEAPVSGSK000000000000000
AK059007	Os02g0564200	Conserved hypothetical protein. (Os02t0564200-01), Conserved hypothetical protein. (Os02t0564200-02)	7461.79	K-GLNATGEFFR-R	000000000000	5	14	556.277	2	-5.41823	0.00365747	1	Os02g0564200|AK059007GLNATGEFFR000000000000
J100080C16	Os02g0564600	Late embryogenesis abundant protein 3 family protein. (Os02t0564600-01)	9482.85	K-EIFWMRDPK-T	00000300000	56	64	619.297	2	-14.031	0.0066286	1	Os02g0564600|J100080C16EIFWMRDPK00000300000
AK072522	Os02g0565500	Similar to Pto kinase interactor 1. (Os02t0565500-01)	39382.1	K-GQQSLVTWATPR-L	00000000000000	284	295	672.354	2	-4.65426	0.000312977	1	Os02g0565500|AK072522GQQSLVTWATPR00000000000000
AK108451	Os02g0574800	Ethylene insensitive 3 domain containing protein. (Os02t0574800-01)	19382.3	R-EYTRSGSGSSSGNSGGGK-F	00000000000000000000	61	78	558.915	3	-1.36864	0.0202408	1	Os02g0574800|AK108451EYTRSGSGSSSGNSGGGK00000000000000000000
AK102294	Os02g0576700	Nucleosome assembly protein (NAP) family protein. (Os02t0576700-01), Nucleosome assembly protein (NAP) family protein. (Os02t0576700-02)	28570.8	K-TYAFADDGTTTINATSIK-W	00000000000000000000	144	161	945.46	2	0.151616	0.024683	1	Os02g0576700|AK102294TYAFADDGTTTINATSIK00000000000000000000
AK068248	Os02g0580300	Similar to 14-3-3 protein 6. (Os02t0580300-01), Similar to 14-3-3 protein 6. (Os02t0580300-02), Similar to 14-3-3 protein 6. (Os02t0580300-03)	29887	R-EENVYMAK-L	0000003000	10	17	500.226	2	-1.37461	0.0241529	8	Os02g0580300|AK068248EENVYMAK0000003000
AK068248	Os02g0580300	Similar to 14-3-3 protein 6. (Os02t0580300-01), Similar to 14-3-3 protein 6. (Os02t0580300-02), Similar to 14-3-3 protein 6. (Os02t0580300-03)	29887	R-NLLSVAYK-N	0000000000	50	57	454.267	2	1.45736	0.00559778	8	Os02g0580300|AK068248NLLSVAYK0000000000
AK068248	Os02g0580300	Similar to 14-3-3 protein 6. (Os02t0580300-01), Similar to 14-3-3 protein 6. (Os02t0580300-02), Similar to 14-3-3 protein 6. (Os02t0580300-03)	29887	R-IISSIEQK-E	0000000000	69	76	459.269	2	-0.0554015	0.00372693	8	Os02g0580300|AK068248IISSIEQK0000000000
AK068248	Os02g0580300	Similar to 14-3-3 protein 6. (Os02t0580300-01), Similar to 14-3-3 protein 6. (Os02t0580300-02), Similar to 14-3-3 protein 6. (Os02t0580300-03)	29887	R-IISSIEQKEESR-G	00000000000000	69	80	709.877	2	-1.57409	9.78271e-07	8	Os02g0580300|AK068248IISSIEQKEESR00000000000000
AK068248	Os02g0580300	Similar to 14-3-3 protein 6. (Os02t0580300-01), Similar to 14-3-3 protein 6. (Os02t0580300-02), Similar to 14-3-3 protein 6. (Os02t0580300-03)	29887	R-KDAAENTMVAYK-A	00000000300000	149	160	678.826	2	-1.58568	0.0037063	8	Os02g0580300|AK068248KDAAENTMVAYK00000000300000
AK068248	Os02g0580300	Similar to 14-3-3 protein 6. (Os02t0580300-01), Similar to 14-3-3 protein 6. (Os02t0580300-02), Similar to 14-3-3 protein 6. (Os02t0580300-03)	29887	K-DSTLIMQLLR-D	000000300000	223	232	603.332	2	1.4098	8.61875e-06	8	Os02g0580300|AK068248DSTLIMQLLR000000300000
AK108467	Os02g0580500	Similar to Prohibitin. (Os02t0580500-01)	30233	M-AGGGQAAASLLTK-L	100000000000000	2	14	593.826	2	2.16699	0.00208379	9	Os02g0580500|AK108467AGGGQAAASLLTK100000000000000
AK108467	Os02g0580500	Similar to Prohibitin. (Os02t0580500-01)	30233	R-TRPHSFSSTSGTK-D	000000000000000	77	89	696.846	2	-1.60779	0.000208853	9	Os02g0580500|AK108467TRPHSFSSTSGTK000000000000000
AK108467	Os02g0580500	Similar to Prohibitin. (Os02t0580500-01)	30233	K-VLPSIGNEVLK-A	0000000000000	124	134	584.851	2	0.885879	0.0198374	9	Os02g0580500|AK108467VLPSIGNEVLK0000000000000
AK108467	Os02g0580500	Similar to Prohibitin. (Os02t0580500-01)	30233	K-QVAQQEAER-S	00000000000	193	201	529.764	2	-1.13514	2.77108e-05	9	Os02g0580500|AK108467QVAQQEAER00000000000
AK108467	Os02g0580500	Similar to Prohibitin. (Os02t0580500-01)	30233	R-LISEATAAAGTGLIELR-R	0000000000000000000	229	245	843.475	2	-0.014802	2.17369e-05	9	Os02g0580500|AK108467LISEATAAAGTGLIELR0000000000000000000
AK108467	Os02g0580500	Similar to Prohibitin. (Os02t0580500-01)	30233	R-LISEATAAAGTGLIELRR-I	00000000000000000000	229	246	614.688	3	1.97825	0.0146872	9	Os02g0580500|AK108467LISEATAAAGTGLIELRR00000000000000000000
AK059067	Os02g0586500	Similar to OSIGBa0124N08.5 protein. (Os02t0586500-01), Similar to Small nuclear ribonucleoprotein Sm D1 (snRNP core protein D1) (Sm-D1) (Sm-D autoantigen). (Os02t0586500-02)	12654	K-LNNETVTIELK-N	0000000000000	10	20	637.355	2	2.64975	0.00235622	1	Os02g0586500|AK059067LNNETVTIELK0000000000000
AK100170	Os02g0588500	Hypothetical conserved gene. (Os02t0588500-01), PLC-like phosphodiesterase, TIM beta/alpha-barrel domain domain containing protein. (Os02t0588500-02)	81814.3	K-LGFGVVDAVIK-A	0000000000000	503	513	559.337	2	3.99397	0.0178983	1	Os02g0588500|AK100170LGFGVVDAVIK0000000000000
AK072777	Os02g0591700	Similar to Candida glabrata strain CBS138 chromosome L complete sequence. (Os02t0591700-01)	24243.2	K-SGLLLITGPFK-I	0000000000000	101	111	573.353	2	5.46259	0.0185884	4	Os02g0591700|AK072777SGLLLITGPFK0000000000000
AK072777	Os02g0591700	Similar to Candida glabrata strain CBS138 chromosome L complete sequence. (Os02t0591700-01)	24243.2	R-VNQAYVIATSTK-V	00000000000000	120	131	647.855	2	2.33639	5.61741e-05	4	Os02g0591700|AK072777VNQAYVIATSTK00000000000000
AK072777	Os02g0591700	Similar to Candida glabrata strain CBS138 chromosome L complete sequence. (Os02t0591700-01)	24243.2	K-KTEGELFETEKEATK-N	00000000000000000	157	171	580.625	3	-5.74303	0.00144636	4	Os02g0591700|AK072777KTEGELFETEKEATK00000000000000000
AK069976	Os02g0593600	Leucine-rich repeat, typical subtype containing protein. (Os02t0593600-01)	55386.9	R-APSGAAEFDLVSR-M	000000000000000	43	55	660.332	2	-1.67085	1.64608e-05	1	Os02g0593600|AK069976APSGAAEFDLVSR000000000000000
AK073096	Os02g0595500	Similar to NAD-dependent isocitrate dehydrogenase precursor (EC 1.1.1.41). (Os02t0595500-01)	41029.2	R-AVTLIPGDGIGPLVTGAVR-Q	000000000000000000000	50	68	903.53	2	1.95735	0.0012828	4	Os02g0595500|AK073096AVTLIPGDGIGPLVTGAVR000000000000000000000
AK073096	Os02g0595500	Similar to NAD-dependent isocitrate dehydrogenase precursor (EC 1.1.1.41). (Os02t0595500-01)	41029.2	K-YAFEYAYLNNR-K	0000000000000	194	204	712.337	2	1.41516	2.11506e-05	4	Os02g0595500|AK073096YAFEYAYLNNR0000000000000
AK073096	Os02g0595500	Similar to NAD-dependent isocitrate dehydrogenase precursor (EC 1.1.1.41). (Os02t0595500-01)	41029.2	R-HLQFPSFADR-L	000000000000	332	341	609.306	2	-0.949511	0.00353897	4	Os02g0595500|AK073096HLQFPSFADR000000000000
AK073096	Os02g0595500	Similar to NAD-dependent isocitrate dehydrogenase precursor (EC 1.1.1.41). (Os02t0595500-01)	41029.2	K-DLGGSSTTQEVTDAVIAHLD--	0000000000000000000000	359	378	1014.99	2	2.49065	0.0122273	4	Os02g0595500|AK073096DLGGSSTTQEVTDAVIAHLD0000000000000000000000
AK109775	Os02g0596300	Cytochrome P450 family protein. (Os02t0596300-01)	43629.4	R-SIEQLVYGR-L	00000000000	13	21	532.791	2	1.66261	0.0141063	4	Os02g0596300|AK109775SIEQLVYGR00000000000
AK109775	Os02g0596300	Cytochrome P450 family protein. (Os02t0596300-01)	43629.4	R-LSGGGAAVDLQEVLLR-F	000000000000000000	29	44	799.452	2	3.81905	0.0110986	4	Os02g0596300|AK109775LSGGGAAVDLQEVLLR000000000000000000
AK109775	Os02g0596300	Cytochrome P450 family protein. (Os02t0596300-01)	43629.4	K-EALADDVLPDGTPVR-A	00000000000000000	232	246	784.401	2	-0.641704	3.80584e-05	4	Os02g0596300|AK109775EALADDVLPDGTPVR00000000000000000
AK109775	Os02g0596300	Cytochrome P450 family protein. (Os02t0596300-01)	43629.4	R-GGAFAGGESPFK-Y	00000000000000	280	291	562.772	2	0.476249	0.00364935	4	Os02g0596300|AK109775GGAFAGGESPFK00000000000000
AK072562	Os02g0596500	Snf7 family protein. (Os02t0596500-01)	25452.3	K-VIEAEKEAAR-Q	000000000000	38	47	558.304	2	-3.98883	0.00292671	2	Os02g0596500|AK072562VIEAEKEAAR000000000000
AK072562	Os02g0596500	Snf7 family protein. (Os02t0596500-01)	25452.3	K-SIQNEINIDDVQK-L	000000000000000	111	123	758.386	2	-0.303532	2.6271e-06	2	Os02g0596500|AK072562SIQNEINIDDVQK000000000000000
AK071215	Os02g0600100	Similar to 26S proteasome subunit RPN7. (Os02t0600100-01)	44263.9	--MDAGGEEAKQER-H	13000000000000	1	12	689.8	2	1.56701	6.05749e-07	3	Os02g0600100|AK071215MDAGGEEAKQER13000000000000
AK071215	Os02g0600100	Similar to 26S proteasome subunit RPN7. (Os02t0600100-01)	44263.9	K-VVDAPEILAVIGK-V	000000000000000	239	251	662.4	2	2.97178	0.00418495	3	Os02g0600100|AK071215VVDAPEILAVIGK000000000000000
AK071215	Os02g0600100	Similar to 26S proteasome subunit RPN7. (Os02t0600100-01)	44263.9	K-QGDFLLNR-I	0000000000	371	378	481.755	2	-1.8798	0.0352575	3	Os02g0600100|AK071215QGDFLLNR0000000000
AK099086	Os02g0601300	Similar to Glyceraldehyde-3-phosphate dehydrogenase, cytosolic 3 (EC 1.2.1.12). (Os02t0601300-01)	36758	K-KVVISAPSK-D	00000000000	120	128	464.795	2	-0.0794327	0.0037802	21	Os02g0601300|AK099086KVVISAPSK00000000000
AK099086	Os02g0601300	Similar to Glyceraldehyde-3-phosphate dehydrogenase, cytosolic 3 (EC 1.2.1.12). (Os02t0601300-01)	36758	K-KVVISAPSKDAPMFVVGVNEK-E	00000000000003000000000	120	140	744.408	3	-0.245053	1.02249e-05	21	Os02g0601300|AK099086KVVISAPSKDAPMFVVGVNEK00000000000003000000000
AK099086	Os02g0601300	Similar to Glyceraldehyde-3-phosphate dehydrogenase, cytosolic 3 (EC 1.2.1.12). (Os02t0601300-01)	36758	K-KVVISAPSKDAPMFVVGVNEKEYK-S	00000000000003000000000000	120	143	663.608	4	-0.282494	0.025759	21	Os02g0601300|AK099086KVVISAPSKDAPMFVVGVNEKEYK00000000000003000000000000
AK099086	Os02g0601300	Similar to Glyceraldehyde-3-phosphate dehydrogenase, cytosolic 3 (EC 1.2.1.12). (Os02t0601300-01)	36758	K-VVISAPSKDAPMFVVGVNEK-E	0000000000003000000000	121	140	1052.06	2	-0.900701	0.0418635	21	Os02g0601300|AK099086VVISAPSKDAPMFVVGVNEK0000000000003000000000
AK099086	Os02g0601300	Similar to Glyceraldehyde-3-phosphate dehydrogenase, cytosolic 3 (EC 1.2.1.12). (Os02t0601300-01)	36758	K-VVISAPSKDAPMFVVGVNEKEYK-S	0000000000003000000000000	121	143	841.777	3	0.379693	0.000110159	21	Os02g0601300|AK099086VVISAPSKDAPMFVVGVNEKEYK0000000000003000000000000
AK099086	Os02g0601300	Similar to Glyceraldehyde-3-phosphate dehydrogenase, cytosolic 3 (EC 1.2.1.12). (Os02t0601300-01)	36758	K-DAPMFVVGVNEK-E	00003000000000	129	140	661.327	2	1.29164	5.44307e-07	21	Os02g0601300|AK099086DAPMFVVGVNEK00003000000000
AK099086	Os02g0601300	Similar to Glyceraldehyde-3-phosphate dehydrogenase, cytosolic 3 (EC 1.2.1.12). (Os02t0601300-01)	36758	K-DAPMFVVGVNEKEYK-S	00003000000000000	129	143	871.428	2	0.94219	0.000530029	21	Os02g0601300|AK099086DAPMFVVGVNEKEYK00003000000000000
AK099086	Os02g0601300	Similar to Glyceraldehyde-3-phosphate dehydrogenase, cytosolic 3 (EC 1.2.1.12). (Os02t0601300-01)	36758	R-FGIVEGLMTTVHAITATQK-T	000000003000000000000	170	188	678.364	3	1.98811	0.000544274	21	Os02g0601300|AK099086FGIVEGLMTTVHAITATQK000000003000000000000
AK099086	Os02g0601300	Similar to Glyceraldehyde-3-phosphate dehydrogenase, cytosolic 3 (EC 1.2.1.12). (Os02t0601300-01)	36758	R-AASFNIIPSSTGAAK-A	00000000000000000	203	217	717.884	2	1.71723	2.37854e-05	21	Os02g0601300|AK099086AASFNIIPSSTGAAK00000000000000000
AK099086	Os02g0601300	Similar to Glyceraldehyde-3-phosphate dehydrogenase, cytosolic 3 (EC 1.2.1.12). (Os02t0601300-01)	36758	R-VPTVDVSVVDLTVR-L	0000000000000000	237	250	749.927	2	-0.315606	3.01808e-09	21	Os02g0601300|AK099086VPTVDVSVVDLTVR0000000000000000
AK099086	Os02g0601300	Similar to Glyceraldehyde-3-phosphate dehydrogenase, cytosolic 3 (EC 1.2.1.12). (Os02t0601300-01)	36758	R-LEKPASYDQIK-A	0000000000000	251	261	646.348	2	-0.527531	0.00136319	21	Os02g0601300|AK099086LEKPASYDQIK0000000000000
AK099086	Os02g0601300	Similar to Glyceraldehyde-3-phosphate dehydrogenase, cytosolic 3 (EC 1.2.1.12). (Os02t0601300-01)	36758	K-AAIKEEAEGK-L	000000000000	262	271	523.281	2	1.33324	0.000162483	21	Os02g0601300|AK099086AAIKEEAEGK000000000000
AK099086	Os02g0601300	Similar to Glyceraldehyde-3-phosphate dehydrogenase, cytosolic 3 (EC 1.2.1.12). (Os02t0601300-01)	36758	K-AAIKEEAEGKLK-G	00000000000000	262	273	643.869	2	-1.239	0.00856749	21	Os02g0601300|AK099086AAIKEEAEGKLK00000000000000
AK099086	Os02g0601300	Similar to Glyceraldehyde-3-phosphate dehydrogenase, cytosolic 3 (EC 1.2.1.12). (Os02t0601300-01)	36758	K-AGIALSDTFVK-L	0000000000000	301	311	561.315	2	3.09875	1.22717e-06	21	Os02g0601300|AK099086AGIALSDTFVK0000000000000
AK099086	Os02g0601300	Similar to Glyceraldehyde-3-phosphate dehydrogenase, cytosolic 3 (EC 1.2.1.12). (Os02t0601300-01)	36758	K-LVSWYDNEWGYSTR-V	0000000000000000	312	325	888.404	2	-1.48525	4.20055e-05	21	Os02g0601300|AK099086LVSWYDNEWGYSTR0000000000000000
AK100424	Os02g0608400	EF-Hand type domain containing protein. (Os02t0608400-01), Similar to Ca2+ binding protein cbp1. (Os02t0608400-02)	87229.2	K-LASQTDENNEDEEEGRQ--	0000000000000000000	751	767	982.408	2	-1.07788	2.60236e-05	1	Os02g0608400|AK100424LASQTDENNEDEEEGRQ0000000000000000000
AK105867	Os02g0608900	Similar to Epstein-Barr virus (B95-8 isolate) U2-IR2 domain encoding nuclear protein EBNA2, complete cds. (Os02t0608900-01), Similar to Epstein-Barr virus (B95-8 isolate) U2-IR2 domain encoding nuclear protein EBNA2, complete cds. (Os02t0608900-02)	41334.3	R-QLFVAPVVGLIAK-N	000000000000000	121	133	677.928	2	1.66363	6.27037e-05	5	Os02g0608900|AK105867QLFVAPVVGLIAK000000000000000
AK105867	Os02g0608900	Similar to Epstein-Barr virus (B95-8 isolate) U2-IR2 domain encoding nuclear protein EBNA2, complete cds. (Os02t0608900-01), Similar to Epstein-Barr virus (B95-8 isolate) U2-IR2 domain encoding nuclear protein EBNA2, complete cds. (Os02t0608900-02)	41334.3	K-NFSVLYDVEAR-N	0000000000000	134	144	656.83	2	-0.69698	4.45092e-05	5	Os02g0608900|AK105867NFSVLYDVEAR0000000000000
AK105867	Os02g0608900	Similar to Epstein-Barr virus (B95-8 isolate) U2-IR2 domain encoding nuclear protein EBNA2, complete cds. (Os02t0608900-01), Similar to Epstein-Barr virus (B95-8 isolate) U2-IR2 domain encoding nuclear protein EBNA2, complete cds. (Os02t0608900-02)	41334.3	R-NALLSGQGSLPGGAIQLR-G	00000000000000000000	145	162	876.49	2	-2.21995	0.00445371	5	Os02g0608900|AK105867NALLSGQGSLPGGAIQLR00000000000000000000
AK105867	Os02g0608900	Similar to Epstein-Barr virus (B95-8 isolate) U2-IR2 domain encoding nuclear protein EBNA2, complete cds. (Os02t0608900-01), Similar to Epstein-Barr virus (B95-8 isolate) U2-IR2 domain encoding nuclear protein EBNA2, complete cds. (Os02t0608900-02)	41334.3	R-QGEVSVITR-L	00000000000	171	179	494.776	2	1.62974	0.00347628	5	Os02g0608900|AK105867QGEVSVITR00000000000
AK105867	Os02g0608900	Similar to Epstein-Barr virus (B95-8 isolate) U2-IR2 domain encoding nuclear protein EBNA2, complete cds. (Os02t0608900-01), Similar to Epstein-Barr virus (B95-8 isolate) U2-IR2 domain encoding nuclear protein EBNA2, complete cds. (Os02t0608900-02)	41334.3	K-MLSLYGIAK-S	03000000000	223	231	506.281	2	0.295689	0.0316891	5	Os02g0608900|AK105867MLSLYGIAK03000000000
AK102477	Os02g0610400	Lupus La protein family protein. (Os02t0610400-01)	51942.2	M-AAATAAPSIDEAKAK-S	10000000000000000	2	16	728.885	2	-1.12208	0.00900042	4	Os02g0610400|AK102477AAATAAPSIDEAKAK10000000000000000
AK102477	Os02g0610400	Lupus La protein family protein. (Os02t0610400-01)	51942.2	K-LEDVQSFFAQYAK-V	000000000000000	134	146	773.384	2	2.03321	0.00913747	4	Os02g0610400|AK102477LEDVQSFFAQYAK000000000000000
AK102477	Os02g0610400	Lupus La protein family protein. (Os02t0610400-01)	51942.2	K-EVNAGEATESGDK-C	000000000000000	294	306	653.791	2	-0.922421	0.00478346	4	Os02g0610400|AK102477EVNAGEATESGDK000000000000000
AK102477	Os02g0610400	Lupus La protein family protein. (Os02t0610400-01)	51942.2	R-MSAVLADEGGLIVK-D	0300000000000000	381	394	709.88	2	-2.25704	0.00319382	4	Os02g0610400|AK102477MSAVLADEGGLIVK0300000000000000
AK099572	Os02g0610600	Similar to 9G8-like SR protein (RSZp22 splicing factor). (Os02t0610600-01)	22996.6	R-DAEDAIRDLDGK-N	00000000000000	50	61	659.315	2	-3.76785	0.00473627	1	Os02g0610600|AK099572DAEDAIRDLDGK00000000000000
AK069360	Os02g0612300	Similar to Nuclear cap binding protein subunit 2 (20 kDa nuclear cap binding protein) (NCBP 20 kDa subunit) (CBP20). (Os02t0612300-01)	28697.7	M-ASLFKDPTK-L	10000000000	2	10	524.788	2	0.803544	0.0169161	1	Os02g0612300|AK069360ASLFKDPTK10000000000
AK066756	Os02g0613000	EF-Hand type domain containing protein. (Os02t0613000-01)	55261.3	R-ITFEEFK-A	000000000	365	371	457.237	2	-0.268415	0.0239332	1	Os02g0613000|AK066756ITFEEFK000000000
J065096D10	Os02g0618250	#N/A	7533.98	--MYLQYYINEK-G	030000000000	1	10	690.828	2	-0.656947	0.0411718	2	Os02g0618250|J065096D10MYLQYYINEK030000000000
J065096D10	Os02g0618250	#N/A	7533.98	K-ESPLGVPTQSAHPAR-F	00000000000000000	20	34	773.903	2	0.993662	0.0275694	2	Os02g0618250|J065096D10ESPLGVPTQSAHPAR00000000000000000
AK101006	Os02g0621700	Similar to Succinyl-CoA ligase [GDP-forming] beta-chain, mitochondrial precursor (EC 6.2.1.4) (Succinyl-CoA synthetase, beta chain) (SCS-beta). (Os02t0621700-01)	45488.9	R-GAAAGSVEEVKNTLK-N	00000000000000000	49	63	737.398	2	-1.34005	2.2774e-05	12	Os02g0621700|AK101006GAAAGSVEEVKNTLK00000000000000000
AK101006	Os02g0621700	Similar to Succinyl-CoA ligase [GDP-forming] beta-chain, mitochondrial precursor (EC 6.2.1.4) (Succinyl-CoA synthetase, beta chain) (SCS-beta). (Os02t0621700-01)	45488.9	K-NVFPSEKEIVVK-S	00000000000000	64	75	694.893	2	-0.269435	0.000864854	12	Os02g0621700|AK101006NVFPSEKEIVVK00000000000000
AK101006	Os02g0621700	Similar to Succinyl-CoA ligase [GDP-forming] beta-chain, mitochondrial precursor (EC 6.2.1.4) (Succinyl-CoA synthetase, beta chain) (SCS-beta). (Os02t0621700-01)	45488.9	K-SGLQGGVHIVK-A	0000000000000	90	100	547.818	2	-2.36596	0.000525101	12	Os02g0621700|AK101006SGLQGGVHIVK0000000000000
AK101006	Os02g0621700	Similar to Succinyl-CoA ligase [GDP-forming] beta-chain, mitochondrial precursor (EC 6.2.1.4) (Succinyl-CoA synthetase, beta chain) (SCS-beta). (Os02t0621700-01)	45488.9	K-SGLQGGVHIVKAEEAESLAAK-M	00000000000000000000000	90	110	698.712	3	0.558795	1.02295e-05	12	Os02g0621700|AK101006SGLQGGVHIVKAEEAESLAAK00000000000000000000000
AK101006	Os02g0621700	Similar to Succinyl-CoA ligase [GDP-forming] beta-chain, mitochondrial precursor (EC 6.2.1.4) (Succinyl-CoA synthetase, beta chain) (SCS-beta). (Os02t0621700-01)	45488.9	K-AEEAESLAAK-M	000000000000	101	110	509.756	2	-1.28729	0.000933353	12	Os02g0621700|AK101006AEEAESLAAK000000000000
AK101006	Os02g0621700	Similar to Succinyl-CoA ligase [GDP-forming] beta-chain, mitochondrial precursor (EC 6.2.1.4) (Succinyl-CoA synthetase, beta chain) (SCS-beta). (Os02t0621700-01)	45488.9	K-MLGQILVTK-Q	03000000000	111	119	509.803	2	1.87839	1.99707e-05	12	Os02g0621700|AK101006MLGQILVTK03000000000
AK101006	Os02g0621700	Similar to Succinyl-CoA ligase [GDP-forming] beta-chain, mitochondrial precursor (EC 6.2.1.4) (Succinyl-CoA synthetase, beta chain) (SCS-beta). (Os02t0621700-01)	45488.9	K-LNFDDNAAFR-Q	000000000000	251	260	591.782	2	2.23013	0.000514458	12	Os02g0621700|AK101006LNFDDNAAFR000000000000
AK101006	Os02g0621700	Similar to Succinyl-CoA ligase [GDP-forming] beta-chain, mitochondrial precursor (EC 6.2.1.4) (Succinyl-CoA synthetase, beta chain) (SCS-beta). (Os02t0621700-01)	45488.9	K-QVDLKVPVVVR-L	2000000000000	373	383	617.88	2	0.445153	0.0200855	12	Os02g0621700|AK101006QVDLKVPVVVR2000000000000
AK101006	Os02g0621700	Similar to Succinyl-CoA ligase [GDP-forming] beta-chain, mitochondrial precursor (EC 6.2.1.4) (Succinyl-CoA synthetase, beta chain) (SCS-beta). (Os02t0621700-01)	45488.9	R-LEGTNVDQGK-R	000000000000	384	393	530.768	2	2.15786	0.00815366	12	Os02g0621700|AK101006LEGTNVDQGK000000000000
AK101006	Os02g0621700	Similar to Succinyl-CoA ligase [GDP-forming] beta-chain, mitochondrial precursor (EC 6.2.1.4) (Succinyl-CoA synthetase, beta chain) (SCS-beta). (Os02t0621700-01)	45488.9	R-LEGTNVDQGKR-I	0000000000000	384	394	608.819	2	1.54962	1.73717e-07	12	Os02g0621700|AK101006LEGTNVDQGKR0000000000000
AK101006	Os02g0621700	Similar to Succinyl-CoA ligase [GDP-forming] beta-chain, mitochondrial precursor (EC 6.2.1.4) (Succinyl-CoA synthetase, beta chain) (SCS-beta). (Os02t0621700-01)	45488.9	K-ESGMTLITAEDLDDAAEK-A	00003000000000000000	398	415	962.94	2	2.16557	0.00179574	12	Os02g0621700|AK101006ESGMTLITAEDLDDAAEK00003000000000000000
016-034-F01	Os02g0622300	Ribosomal protein L14 family protein. (Os02t0622300-00)	4714.43	R-LVVIVDVVDQNR-G	00000000000000	24	35	684.896	2	0.382707	6.50456e-06	1	Os02g0622300|016-034-F01LVVIVDVVDQNR00000000000000
AK061679	Os02g0622400	Glycolipid transfer protein, GLTP domain containing protein. (Os02t0622400-01)	22971.5	K-SDIGGNITR-L	00000000000	51	59	466.744	2	2.11971	4.88899e-05	2	Os02g0622400|AK061679SDIGGNITR00000000000
AK061679	Os02g0622400	Glycolipid transfer protein, GLTP domain containing protein. (Os02t0622400-01)	22971.5	K-FMEVISGTGDIK-A	00300000000000	159	170	656.826	2	-0.299468	0.00260581	2	Os02g0622400|AK061679FMEVISGTGDIK00300000000000
AK066521	Os02g0623500	Lysyl-tRNA synthetase, class II domain containing protein. (Os02t0623500-01), Similar to Lysyl-tRNA synthetase. (Os02t0623500-02)	66288.8	K-KVEELRGK-G	0000000000	81	88	479.788	2	0.570928	0.0311754	1	Os02g0623500|AK066521KVEELRGK0000000000
AK101791	Os02g0625500	Similar to Adenosine kinase-like protein (Fragment). (Os02t0625500-01)	41318.1	K-GNVEYIAGGATQNSIR-V	000000000000000000	89	104	825.417	2	1.32438	2.60817e-06	9	Os02g0625500|AK101791GNVEYIAGGATQNSIR000000000000000000
AK101791	Os02g0625500	Similar to Adenosine kinase-like protein (Fragment). (Os02t0625500-01)	41318.1	K-VLPFVDYIFGNETEAR-I	000000000000000000	244	259	935.474	2	1.90393	0.0387825	9	Os02g0625500|AK101791VLPFVDYIFGNETEAR000000000000000000
AK101791	Os02g0625500	Similar to Adenosine kinase-like protein (Fragment). (Os02t0625500-01)	41318.1	K-VRGWETENVEEIALK-I	00000000000000000	264	278	886.964	2	1.82269	0.022216	9	Os02g0625500|AK101791VRGWETENVEEIALK00000000000000000
AK101791	Os02g0625500	Similar to Adenosine kinase-like protein (Fragment). (Os02t0625500-01)	41318.1	K-ISQLPLASGK-Q	000000000000	279	288	507.303	2	-1.16759	0.001247	9	Os02g0625500|AK101791ISQLPLASGK000000000000
AK101791	Os02g0625500	Similar to Adenosine kinase-like protein (Fragment). (Os02t0625500-01)	41318.1	R-IAVITQGADPVVVAEDGQVK-T	0000000000000000000000	292	311	1005.05	2	1.87713	1.71623e-09	9	Os02g0625500|AK101791IAVITQGADPVVVAEDGQVK0000000000000000000000
AK102817	Os02g0626100	Similar to Phenylalanine ammonia-lyase. (Os02t0626100-01), Similar to Phenylalanine ammonia-lyase. (Os02t0626100-02), Similar to Phenylalanine ammonia-lyase. (Os02t0626100-03)	76161.2	K-VLTMNPTGDLSSAR-F	0000300000000000	534	547	739.372	2	3.10989	0.0472301	1	Os02g0626100|AK102817VLTMNPTGDLSSAR0000300000000000
AK058725	Os02g0628800	Similar to Ubiquitin-like protein 5. (Os02t0628800-01)	8594.46	--MIEVVLNDR-L	03000000000	1	9	552.79	2	0.382811	1.5183e-05	2	Os02g0628800|AK058725MIEVVLNDR03000000000
AK058725	Os02g0628800	Similar to Ubiquitin-like protein 5. (Os02t0628800-01)	8594.46	K-LVAAQTGTR-A	00000000000	30	38	458.764	2	-0.142462	0.00388723	2	Os02g0628800|AK058725LVAAQTGTR00000000000
AK061782	Os02g0629200	Similar to cDNA clone:001-039-E03, full insert sequence. (Os02t0629200-01), Similar to HvPIP2;1 protein. (Os02t0629200-02)	30763	M-AKDIEASAPEGGEFSAK-D	0000000000000000000	2	18	853.913	2	-2.1926	1.03829e-08	7	Os02g0629200|AK061782AKDIEASAPEGGEFSAK0000000000000000000
AK061782	Os02g0629200	Similar to cDNA clone:001-039-E03, full insert sequence. (Os02t0629200-01), Similar to HvPIP2;1 protein. (Os02t0629200-02)	30763	K-GFQSSYYAR-Y	00000000000	149	157	539.751	2	0.279237	0.000556228	7	Os02g0629200|AK061782GFQSSYYAR00000000000
AK061782	Os02g0629200	Similar to cDNA clone:001-039-E03, full insert sequence. (Os02t0629200-01), Similar to HvPIP2;1 protein. (Os02t0629200-02)	30763	R-YGGGANELSDGYSK-G	0000000000000000	158	171	709.314	2	-1.91111	1.08405e-09	7	Os02g0629200|AK061782YGGGANELSDGYSK0000000000000000
AK061782	Os02g0629200	Similar to cDNA clone:001-039-E03, full insert sequence. (Os02t0629200-01), Similar to HvPIP2;1 protein. (Os02t0629200-02)	30763	R-SLGTAVIYNK-D	000000000000	236	245	533.302	2	1.99697	6.36844e-06	7	Os02g0629200|AK061782SLGTAVIYNK000000000000
AK061782	Os02g0629200	Similar to cDNA clone:001-039-E03, full insert sequence. (Os02t0629200-01), Similar to HvPIP2;1 protein. (Os02t0629200-02)	30763	R-SLGTAVIYNKDK-A	00000000000000	236	247	654.854	2	-10.9993	0.00913099	7	Os02g0629200|AK061782SLGTAVIYNKDK00000000000000
AK068667	Os02g0631000	Conserved hypothetical protein. (Os02t0631000-01)	42729.7	M-ASSPEAAAVGEEEKGK-G	100000000000000000	2	17	801.386	2	-0.204388	0.0345026	1	Os02g0631000|AK068667ASSPEAAAVGEEEKGK100000000000000000
AK073723	Os02g0633400	Similar to 61 kDa protein homolog. (Os02t0633400-01)	31872.5	R-VTDVSFTLDDGTGR-V	0000000000000000	102	115	741.856	2	-1.00691	0.0223802	2	Os02g0633400|AK073723VTDVSFTLDDGTGR0000000000000000
AK073723	Os02g0633400	Similar to 61 kDa protein homolog. (Os02t0633400-01)	31872.5	K-SQVNANTATGTPNQTMPR-D	00000000000000003000	188	205	952.452	2	2.28484	0.019729	2	Os02g0633400|AK073723SQVNANTATGTPNQTMPR00000000000000003000
AK072855	Os02g0634900	Proteasome subunit alpha type 2 (EC 3.4.25.1) (20S proteasome alpha subunit B) (20S proteasome subunit alpha-2). (Os02t0634900-01)	25828.3	K-KLPSILVDETSVQK-I	0000000000000000	51	64	519.635	3	0.813737	0.0118831	3	Os02g0634900|AK072855KLPSILVDETSVQK0000000000000000
AK072855	Os02g0634900	Proteasome subunit alpha type 2 (EC 3.4.25.1) (20S proteasome alpha subunit B) (20S proteasome subunit alpha-2). (Os02t0634900-01)	25828.3	R-KQAQQYYR-L	0000000000	92	99	542.78	2	-0.776038	0.0432318	3	Os02g0634900|AK072855KQAQQYYR0000000000
AK072855	Os02g0634900	Proteasome subunit alpha type 2 (EC 3.4.25.1) (20S proteasome alpha subunit B) (20S proteasome subunit alpha-2). (Os02t0634900-01)	25828.3	K-ETIPVTQLVR-E	000000000000	103	112	578.341	2	1.00458	0.00103536	3	Os02g0634900|AK072855ETIPVTQLVR000000000000
AK120841	Os02g0640000	C2 calcium-dependent membrane targeting domain containing protein. (Os02t0640000-01)	15978.9	M-VHGTLEVLLVGAK-G	000000000000000	2	14	668.403	2	0.0126977	0.0120558	1	Os02g0640000|AK120841VHGTLEVLLVGAK000000000000000
AK069079	Os02g0640300	Similar to Membrane steroid binding protein 1 (AtMP1). (Os02t0640300-01)	35542.4	K-GQIYDVTQSR-M	000000000000	93	102	583.794	2	1.22606	2.97295e-05	1	Os02g0640300|AK069079GQIYDVTQSR000000000000
Os02g0641000	Os02g0641000	Similar to OSIGBa0125M19.14 protein. (Os02t0641000-00)	23500.2	K-GSYNHLIQTAQSK-Q	000000000000000	166	178	723.87	2	-0.155198	0.000878985	2	Os02g0641000|Os02g0641000GSYNHLIQTAQSK000000000000000
AK102431	Os02g0644100	Similar to Heat shock protein STI (Stress inducible protein) (GmSTI). (Os02t0644100-01), Similar to heat shock protein STI. (Os02t0644100-02)	65228.8	R-SAALASVHR-Y	00000000000	43	51	456.258	2	3.48156	0.00528187	2	Os02g0644100|AK102431SAALASVHR00000000000
AK102431	Os02g0644100	Similar to Heat shock protein STI (Stress inducible protein) (GmSTI). (Os02t0644100-01), Similar to heat shock protein STI. (Os02t0644100-02)	65228.8	K-LVSAGIVQMR--	000000000300	569	578	545.308	2	-0.259923	0.0356571	2	Os02g0644100|AK102431LVSAGIVQMR000000000300
AK103028	Os02g0650900	Similar to Glutamate dehydrogenase 2 (EC 1.4.1.3) (GDH 2). (Os02t0650900-01)	44851.9	--MNALAATSR-N	13000000000	1	9	496.745	2	-0.0190858	0.00011789	1	Os02g0650900|AK103028MNALAATSR13000000000
Os02g0653400	Os02g0653400	Similar to OSIGBa0101C23.8 protein. (Os02t0653400-01)	40070.6	R-LSVVVVDAAGGDDSLAGK-T	00000000000000000000	290	307	836.942	2	1.34734	0.0438561	1	Os02g0653400|Os02g0653400LSVVVVDAAGGDDSLAGK00000000000000000000
J033067E03	Os02g0653800	Similar to GTP-binding protein. (Os02t0653800-01)	22703.3	--MNPEYDYLFK-L	030000000000	1	10	668.306	2	8.69697	0.0288065	4	Os02g0653800|J033067E03MNPEYDYLFK030000000000
J033067E03	Os02g0653800	Similar to GTP-binding protein. (Os02t0653800-01)	22703.3	K-LQIWDTAGQER-F	0000000000000	59	69	658.834	2	0.389487	2.24942e-05	4	Os02g0653800|J033067E03LQIWDTAGQER0000000000000
J033067E03	Os02g0653800	Similar to GTP-binding protein. (Os02t0653800-01)	22703.3	K-AFADEMGIPFMETSAK-N	000000300003000000	138	153	888.895	2	0.0764129	0.00670819	4	Os02g0653800|J033067E03AFADEMGIPFMETSAK000000300003000000
AK066320	Os02g0654500	Peptidase C12, ubiquitin carboxyl-terminal hydrolase 1 family protein. (Os02t0654500-01)	25178.1	K-LVEGSYFDR-F	00000000000	114	122	543.267	2	0.0799229	5.65544e-05	1	Os02g0654500|AK066320LVEGSYFDR00000000000
Os02g0661000	Os02g0661000	Similar to peroxisomal biogenesis factor 19. (Os02t0661000-00)	26887.2	K-SGGEASAASSSSSGSGDAKPVK-G	000000000000000000000000	35	56	641.969	3	1.20948	0.0222548	1	Os02g0661000|Os02g0661000SGGEASAASSSSSGSGDAKPVK000000000000000000000000
AK069605	Os02g0663800	Similar to Actin-depolymerizing factor (ADF). (Os02t0663800-01)	16281	K-VQQVVVDR-L	0000000000	38	45	471.771	2	-2.05276	5.84556e-05	3	Os02g0663800|AK069605VQQVVVDR0000000000
AK069605	Os02g0663800	Similar to Actin-depolymerizing factor (ADF). (Os02t0663800-01)	16281	K-IFFISWAPDTSR-V	00000000000000	85	96	720.369	2	-0.107433	0.00042906	3	Os02g0663800|AK069605IFFISWAPDTSR00000000000000
AK058456	Os02g0664000	Similar to Phospholipid hydroperoxide glutathione peroxidase, chloroplast precursor (EC 1.11.1.12) (PHGPx). (Os02t0664000-01)	26035.5	K-VDVNGDNTAPIYK-F	000000000000000	173	185	703.349	2	-2.89555	0.00760603	4	Os02g0664000|AK058456VDVNGDNTAPIYK000000000000000
AK058456	Os02g0664000	Similar to Phospholipid hydroperoxide glutathione peroxidase, chloroplast precursor (EC 1.11.1.12) (PHGPx). (Os02t0664000-01)	26035.5	K-GGLFGDNIK-W	00000000000	192	200	460.746	2	0.946392	0.0112062	4	Os02g0664000|AK058456GGLFGDNIK00000000000
AK058456	Os02g0664000	Similar to Phospholipid hydroperoxide glutathione peroxidase, chloroplast precursor (EC 1.11.1.12) (PHGPx). (Os02t0664000-01)	26035.5	K-FLVDKEGR-V	0000000000	206	213	482.266	2	-0.761473	0.000318886	4	Os02g0664000|AK058456FLVDKEGR0000000000
AK058456	Os02g0664000	Similar to Phospholipid hydroperoxide glutathione peroxidase, chloroplast precursor (EC 1.11.1.12) (PHGPx). (Os02t0664000-01)	26035.5	R-YAPTTSPLSMEK-D	00000000003000	218	229	670.825	2	1.51675	0.0248834	4	Os02g0664000|AK058456YAPTTSPLSMEK00000000003000
AK059298	Os02g0664200	Similar to UDP-glucose:glycoprotein glucosyltransferase 1 precursor (EC 2.4.1.-) (UDP-glucose ceramide glucosyltransferase-like 1) (UDP-- Glc:glycoprotein glucosyltransferase) (HUGT1). (Os02t0664200-01)	28320.3	K-VIFVDADQIVR-A	0000000000000	39	49	637.86	2	1.47057	0.0168615	1	Os02g0664200|AK059298VIFVDADQIVR0000000000000
AK059298	Os02g0664200	Similar to UDP-glucose:glycoprotein glucosyltransferase 1 precursor (EC 2.4.1.-) (UDP-glucose ceramide glucosyltransferase-like 1) (UDP-- Glc:glycoprotein glucosyltransferase) (HUGT1). (Os02t0664200-01)	28320.3	R-ADMGELYDMNLK-G	00000000030000	50	61	708.309	2	-5.42564	0.0352426	1	Os02g0664200|AK059298ADMGELYDMNLK00000000030000
AK103807	Os02g0666200	Aquaporin. (Os02t0666200-01), Aquaporin. (Os02t0666200-02)	31024.1	--MEGKEEDVR-L	13000000000	1	9	575.756	2	0.304284	0.000798856	3	Os02g0666200|AK103807MEGKEEDVR13000000000
AK103807	Os02g0666200	Aquaporin. (Os02t0666200-01), Aquaporin. (Os02t0666200-02)	31024.1	R-QPIGTAAQGAGDDK-D	0000000000000000	19	32	664.826	2	0.46408	0.000306902	3	Os02g0666200|AK103807QPIGTAAQGAGDDK0000000000000000
AK103807	Os02g0666200	Aquaporin. (Os02t0666200-01), Aquaporin. (Os02t0666200-02)	31024.1	R-SLGAAIIYNK-D	000000000000	242	251	525.305	2	3.46562	5.83586e-05	3	Os02g0666200|AK103807SLGAAIIYNK000000000000
AY587109	Os02g0669100	Dehydrin family protein. (Os02t0669100-01)	30903.6	K-GSGEEDKTAAAATGEHK-S	0000000000000000000	271	287	553.593	3	2.06695	0.000458186	1	Os02g0669100|AY587109GSGEEDKTAAAATGEHK0000000000000000000
AB079636	Os02g0670400	Similar to HMGc1 protein. (Os02t0670400-01)	15755.7	K-RPPSAFFVFMSEFR-Q	0000000000300000	35	48	578.623	3	4.46721	0.0165294	4	Os02g0670400|AB079636RPPSAFFVFMSEFR0000000000300000
AB079636	Os02g0670400	Similar to HMGc1 protein. (Os02t0670400-01)	15755.7	R-QEYQAAHPDNK-S	2000000000000	49	59	642.285	2	-1.312	0.0190002	4	Os02g0670400|AB079636QEYQAAHPDNK2000000000000
AB079636	Os02g0670400	Similar to HMGc1 protein. (Os02t0670400-01)	15755.7	R-QEYQAAHPDNK-S	0000000000000	49	59	650.8	2	0.734112	0.0368871	4	Os02g0670400|AB079636QEYQAAHPDNK0000000000000
AB079636	Os02g0670400	Similar to HMGc1 protein. (Os02t0670400-01)	15755.7	R-AMSEQEKAPYVDK-A	003000000000000	74	86	504.573	3	-0.893362	0.0149328	4	Os02g0670400|AB079636AMSEQEKAPYVDK003000000000000
AK111553	Os02g0672200	Similar to AGO1 homologous protein. (Os02t0672200-01), Similar to Protein argonaute 1A. (Os02t0672200-02)	121510	R-ISGLTSQATR-E	000000000000	469	478	517.286	2	1.52616	0.0171849	2	Os02g0672200|AK111553ISGLTSQATR000000000000
AK111553	Os02g0672200	Similar to AGO1 homologous protein. (Os02t0672200-01), Similar to Protein argonaute 1A. (Os02t0672200-02)	121510	R-NTVLVDALTR-R	000000000000	768	777	551.319	2	3.43547	0.00894087	2	Os02g0672200|AK111553NTVLVDALTR000000000000
AK073916	Os02g0676000	Membrane bound O-acyl transferase, MBOAT family protein. (Os02t0676000-01), Similar to predicted protein. (Os02t0676000-02)	51906.9	K-DYLEYTER-K	0000000000	184	191	544.75	2	3.21571	0.00238941	2	Os02g0676000|AK073916DYLEYTER0000000000
AK073916	Os02g0676000	Membrane bound O-acyl transferase, MBOAT family protein. (Os02t0676000-01), Similar to predicted protein. (Os02t0676000-02)	51906.9	K-GLWASPTPSPLLPTLR-A	000000000000000000	193	208	853.483	2	-3.29787	0.0229729	2	Os02g0676000|AK073916GLWASPTPSPLLPTLR000000000000000000
AK071766	Os02g0678400	NAD(P)-binding domain containing protein. (Os02t0678400-01)	35034.7	R-MPISSDLSNPR-N	0300000000000	179	189	616.801	2	0.273547	1.24868e-06	1	Os02g0678400|AK071766MPISSDLSNPR0300000000000
AK102210	Os02g0680400	Similar to CaaX processing zinc-metallo endoprotease. (Os02t0680400-01), Similar to CAAX prenyl protease 1 homolog. (Os02t0680400-02)	48619.7	K-LPTLPKPLVGVISGEK-F	000000000000000000	33	48	550.005	3	-3.23889	7.66549e-05	2	Os02g0680400|AK102210LPTLPKPLVGVISGEK000000000000000000
AK102210	Os02g0680400	Similar to CaaX processing zinc-metallo endoprotease. (Os02t0680400-01), Similar to CAAX prenyl protease 1 homolog. (Os02t0680400-02)	48619.7	K-LFVVDGSTR-S	00000000000	237	245	497.272	2	0.274946	0.000757946	2	Os02g0680400|AK102210LFVVDGSTR00000000000
AK102210	Os02g0680400	Similar to CaaX processing zinc-metallo endoprotease. (Os02t0680400-01), Similar to CAAX prenyl protease 1 homolog. (Os02t0680400-02)	48619.7	K-NLGYAPQLR-A	00000000000	371	379	516.285	2	0.40016	0.0143825	2	Os02g0680400|AK102210NLGYAPQLR00000000000
013-015-B07	Os02g0684500	Similar to Histone H4. (Os02t0684500-00)	11402.4	R-DNIQGITKPAIR-R	00000000000000	25	36	663.38	2	0.0233297	0.0300213	6	Os02g0684500|013-015-B07DNIQGITKPAIR00000000000000
013-015-B07	Os02g0684500	Similar to Histone H4. (Os02t0684500-00)	11402.4	R-ISGLIYEETR-G	000000000000	47	56	590.813	2	-1.16336	1.22316e-05	6	Os02g0684500|013-015-B07ISGLIYEETR000000000000
013-015-B07	Os02g0684500	Similar to Histone H4. (Os02t0684500-00)	11402.4	K-IFLENVIR-D	0000000000	61	68	502.299	2	-2.09514	0.00311267	6	Os02g0684500|013-015-B07IFLENVIR0000000000
013-015-B07	Os02g0684500	Similar to Histone H4. (Os02t0684500-00)	11402.4	R-DAVTYTEHAR-R	000000000000	69	78	581.776	2	-2.99854	0.024429	6	Os02g0684500|013-015-B07DAVTYTEHAR000000000000
013-015-B07	Os02g0684500	Similar to Histone H4. (Os02t0684500-00)	11402.4	R-KTVTAMDVVYALK-R	000000300000000	80	92	727.9	2	0.726429	0.0106381	6	Os02g0684500|013-015-B07KTVTAMDVVYALK000000300000000
013-015-B07	Os02g0684500	Similar to Histone H4. (Os02t0684500-00)	11402.4	K-TVTAMDVVYALK-R	00000300000000	81	92	663.851	2	-2.71186	0.00605123	6	Os02g0684500|013-015-B07TVTAMDVVYALK00000300000000
AK119608	Os02g0686400	Similar to Aspartyl-tRNA synthetase (EC 6.1.1.12) (Aspartate--tRNA ligase) (AspRS). (Os02t0686400-01), Similar to Aspartyl-tRNA synthetase (EC 6.1.1.12) (Aspartate--tRNA ligase) (AspRS). (Os02t0686400-02)	61605.5	R-GAAQAIRPVSK-K	0000000000000	105	115	549.328	2	6.28616	0.00776709	2	Os02g0686400|AK119608GAAQAIRPVSK0000000000000
AK119608	Os02g0686400	Similar to Aspartyl-tRNA synthetase (EC 6.1.1.12) (Aspartate--tRNA ligase) (AspRS). (Os02t0686400-01), Similar to Aspartyl-tRNA synthetase (EC 6.1.1.12) (Aspartate--tRNA ligase) (AspRS). (Os02t0686400-02)	61605.5	K-ATTQQVEIQVR-K	0000000000000	173	183	636.848	2	-2.12979	0.00182248	2	Os02g0686400|AK119608ATTQQVEIQVR0000000000000
AK119608	Os02g0686400	Similar to Aspartyl-tRNA synthetase (EC 6.1.1.12) (Aspartate--tRNA ligase) (AspRS). (Os02t0686400-01), Similar to Aspartyl-tRNA synthetase (EC 6.1.1.12) (Aspartate--tRNA ligase) (AspRS). (Os02t0686400-02)	61605.5	R-KIYCINR-A	000000000	184	190	490.774	2	6.6137	0.0497857	2	Os02g0686400|AK119608KIYCINR000000000
AK105916	Os02g0690800	Peptidase M20 family protein. (Os02t0690800-01), Peptidase M20 family protein. (Os02t0690800-02)	49073.2	R-SNVIVEYPGTVPGR-A	0000000000000000	78	91	744.394	2	-3.56318	1.16546e-06	2	Os02g0690800|AK105916SNVIVEYPGTVPGR0000000000000000
AK105916	Os02g0690800	Peptidase M20 family protein. (Os02t0690800-01), Peptidase M20 family protein. (Os02t0690800-02)	49073.2	R-LGEVKPVLK-H	00000000000	149	157	491.819	2	1.57763	0.0087151	2	Os02g0690800|AK105916LGEVKPVLK00000000000
AJ495787	Os02g0697300	ENTH/VHS domain containing protein. (Os02t0697300-01)	43792.8	R-LIDDPQTVVNNR-N	00000000000000	134	145	692.364	2	-1.02759	0.00217208	2	Os02g0697300|AJ495787LIDDPQTVVNNR00000000000000
AK121709	Os02g0699600	Similar to 60S ribosomal protein L12. (Os02t0699600-01)	17847.7	K-VSVVPSAAALVIK-A	000000000000000	72	84	627.392	2	-5.33021	0.0150571	3	Os02g0699600|AK121709VSVVPSAAALVIK000000000000000
AK121709	Os02g0699600	Similar to 60S ribosomal protein L12. (Os02t0699600-01)	17847.7	K-HSGNISLDDVIEIAR-V	00000000000000000	101	115	819.923	2	-3.73478	1.52769e-07	3	Os02g0699600|AK121709HSGNISLDDVIEIAR00000000000000000
AK121709	Os02g0699600	Similar to 60S ribosomal protein L12. (Os02t0699600-01)	17847.7	K-DLQQEISDGEVEIPSA--	000000000000000000	151	166	865.407	2	-3.71993	0.0317973	3	Os02g0699600|AK121709DLQQEISDGEVEIPSA000000000000000000
AK060640	Os02g0701900	NAD(P)-binding domain containing protein. (Os02t0701900-01)	34885.4	R-HVLITGGSSGIGLAMATAAAR-E	00000000000000030000000	38	58	657.358	3	5.18101	0.00287352	1	Os02g0701900|AK060640HVLITGGSSGIGLAMATAAAR00000000000000030000000
AK070562	Os02g0704900	Similar to Inorganic pyrophosphatase-like protein. (Os02t0704900-01), Similar to Inorganic pyrophosphatase-like protein. (Os02t0704900-02), Similar to Inorganic pyrophosphatase-like protein. (Os02t0704900-03)	24428.4	M-AGEADGKAPLGSR-Y	100000000000000	2	14	635.823	2	0.585712	0.00323929	7	Os02g0704900|AK070562AGEADGKAPLGSR100000000000000
AK070562	Os02g0704900	Similar to Inorganic pyrophosphatase-like protein. (Os02t0704900-01), Similar to Inorganic pyrophosphatase-like protein. (Os02t0704900-02), Similar to Inorganic pyrophosphatase-like protein. (Os02t0704900-03)	24428.4	K-VKYELDKATGLIK-V	000000000000000	63	75	493.292	3	0.191516	0.00135678	7	Os02g0704900|AK070562VKYELDKATGLIK000000000000000
AK070562	Os02g0704900	Similar to Inorganic pyrophosphatase-like protein. (Os02t0704900-01), Similar to Inorganic pyrophosphatase-like protein. (Os02t0704900-02), Similar to Inorganic pyrophosphatase-like protein. (Os02t0704900-03)	24428.4	K-VKYELDKATGLIKVDR-V	000000000000000000	63	78	462.772	4	3.59869	0.0318664	7	Os02g0704900|AK070562VKYELDKATGLIKVDR000000000000000000
AK070562	Os02g0704900	Similar to Inorganic pyrophosphatase-like protein. (Os02t0704900-01), Similar to Inorganic pyrophosphatase-like protein. (Os02t0704900-02), Similar to Inorganic pyrophosphatase-like protein. (Os02t0704900-03)	24428.4	R-VLYSSVVYPHNYGFIPR-T	0000000000000000000	79	95	671.02	3	1.21076	0.000177554	7	Os02g0704900|AK070562VLYSSVVYPHNYGFIPR0000000000000000000
AK070562	Os02g0704900	Similar to Inorganic pyrophosphatase-like protein. (Os02t0704900-01), Similar to Inorganic pyrophosphatase-like protein. (Os02t0704900-02), Similar to Inorganic pyrophosphatase-like protein. (Os02t0704900-03)	24428.4	K-IIAVCADDPEYR-H	00000000000000	140	151	718.346	2	-2.65655	0.00633891	7	Os02g0704900|AK070562IIAVCADDPEYR00000000000000
AK070562	Os02g0704900	Similar to Inorganic pyrophosphatase-like protein. (Os02t0704900-01), Similar to Inorganic pyrophosphatase-like protein. (Os02t0704900-02), Similar to Inorganic pyrophosphatase-like protein. (Os02t0704900-03)	24428.4	R-FFEDYKK-N	000000000	170	176	488.741	2	-2.22665	0.0396753	7	Os02g0704900|AK070562FFEDYKK000000000
AK070562	Os02g0704900	Similar to Inorganic pyrophosphatase-like protein. (Os02t0704900-01), Similar to Inorganic pyrophosphatase-like protein. (Os02t0704900-02), Similar to Inorganic pyrophosphatase-like protein. (Os02t0704900-03)	24428.4	K-EVAVNEFLPAEDAINAIK-Y	00000000000000000000	181	198	972.009	2	-1.12382	2.87609e-05	7	Os02g0704900|AK070562EVAVNEFLPAEDAINAIK00000000000000000000
AB110204	Os02g0709900	Hypothetical conserved gene. (Os02t0709900-01)	132606	K-ITDAQSLEASLEEK-R	0000000000000000	142	155	767.391	2	7.46031	0.000204763	7	Os02g0709900|AB110204ITDAQSLEASLEEK0000000000000000
AB110204	Os02g0709900	Hypothetical conserved gene. (Os02t0709900-01)	132606	K-LLEDHNVK-L	0000000000	328	335	484.266	2	3.81228	0.0434282	7	Os02g0709900|AB110204LLEDHNVK0000000000
AB110204	Os02g0709900	Hypothetical conserved gene. (Os02t0709900-01)	132606	K-SFDAMLVQK-E	00000300000	353	361	527.768	2	4.13124	0.00883424	7	Os02g0709900|AB110204SFDAMLVQK00000300000
AB110204	Os02g0709900	Hypothetical conserved gene. (Os02t0709900-01)	132606	R-QTAAAVTQAPGEK-R	000000000000000	1004	1016	636.334	2	1.43565	0.0163501	7	Os02g0709900|AB110204QTAAAVTQAPGEK000000000000000
AB110204	Os02g0709900	Hypothetical conserved gene. (Os02t0709900-01)	132606	R-TTVANAATAAQTNK-K	0000000000000000	1023	1036	681.353	2	-1.94398	0.000973777	7	Os02g0709900|AB110204TTVANAATAAQTNK0000000000000000
AB110204	Os02g0709900	Hypothetical conserved gene. (Os02t0709900-01)	132606	K-QTVEATADDTEGTSK-A	00000000000000000	1046	1060	776.852	2	-0.00321394	0.000268329	7	Os02g0709900|AB110204QTVEATADDTEGTSK00000000000000000
AB110204	Os02g0709900	Hypothetical conserved gene. (Os02t0709900-01)	132606	K-QTVEATADDTEGTSKAEEPATGSK-G	00000000000000000000000000	1046	1069	808.372	3	-1.09384	0.0068068	7	Os02g0709900|AB110204QTVEATADDTEGTSKAEEPATGSK00000000000000000000000000
AK100997	Os02g0710900	Heat shock protein Hsp70 family protein. (Os02t0710900-01)	99451.4	K-VAAVHLAPGR-V	000000000000	44	53	495.796	2	-0.416664	0.0393748	7	Os02g0710900|AK100997VAAVHLAPGR000000000000
AK100997	Os02g0710900	Heat shock protein Hsp70 family protein. (Os02t0710900-01)	99451.4	R-VPIAVAINEMSK-R	00000000003000	54	65	644.352	2	-0.938236	0.00041693	7	Os02g0710900|AK100997VPIAVAINEMSK00000000003000
AK100997	Os02g0710900	Heat shock protein Hsp70 family protein. (Os02t0710900-01)	99451.4	K-SPALAALADGNR-L	00000000000000	68	79	578.312	2	4.5165	0.000177563	7	Os02g0710900|AK100997SPALAALADGNR00000000000000
AK100997	Os02g0710900	Heat shock protein Hsp70 family protein. (Os02t0710900-01)	99451.4	R-LAGEEASGITAR-H	00000000000000	80	91	587.804	2	-4.11846	2.88383e-05	7	Os02g0710900|AK100997LAGEEASGITAR00000000000000
AK100997	Os02g0710900	Heat shock protein Hsp70 family protein. (Os02t0710900-01)	99451.4	R-LVNYFADQFNK-Q	0000000000000	278	288	679.841	2	0.416392	0.000361182	7	Os02g0710900|AK100997LVNYFADQFNK0000000000000
AK100997	Os02g0710900	Heat shock protein Hsp70 family protein. (Os02t0710900-01)	99451.4	K-FVEYSVSGLTDASEK-Y	00000000000000000	504	518	816.397	2	4.06102	0.00045634	7	Os02g0710900|AK100997FVEYSVSGLTDASEK00000000000000000
AK100997	Os02g0710900	Heat shock protein Hsp70 family protein. (Os02t0710900-01)	99451.4	K-STPVYSPPAFTSEEVYEK-V	00000000000000000000	805	822	1015.99	2	5.01772	0.0178871	7	Os02g0710900|AK100997STPVYSPPAFTSEEVYEK00000000000000000000
AK071251	Os02g0713400	Similar to Thioredoxin reductase 1 (EC 1.8.1.9) (NADPH-dependent thioredoxin reductase 1) (NTR 1). (Os02t0713400-01)	35009.7	R-NKPIAVIGGGDSAMEESNFLTK-Y	000000000000003000000000	157	178	765.381	3	-1.71801	0.00824554	2	Os02g0713400|AK071251NKPIAVIGGGDSAMEESNFLTK000000000000003000000000
AK071251	Os02g0713400	Similar to Thioredoxin reductase 1 (EC 1.8.1.9) (NADPH-dependent thioredoxin reductase 1) (NTR 1). (Os02t0713400-01)	35009.7	K-GVFAAGDVQDKK-Y	00000000000000	287	298	617.823	2	-3.75951	0.0261365	2	Os02g0713400|AK071251GVFAAGDVQDKK00000000000000
013-046-F07	Os02g0715400	Conserved hypothetical protein. (Os02t0715400-00)	10420.1	R-NTDPARDPDEENSAAPADR-A	000000000000000000000	50	68	680.965	3	-2.06215	0.00355731	2	Os02g0715400|013-046-F07NTDPARDPDEENSAAPADR000000000000000000000
013-046-F07	Os02g0715400	Conserved hypothetical protein. (Os02t0715400-00)	10420.1	R-AVEEPAAAAAPVEEGEGK-G	00000000000000000000	69	86	862.922	2	2.24092	1.61371e-06	2	Os02g0715400|013-046-F07AVEEPAAAAAPVEEGEGK00000000000000000000
AK065836	Os02g0717300	Mitochondrial import inner membrane translocase, subunit Tim17/22 family protein. (Os02t0717300-01)	15809.2	M-GLEEDTPVTK-T	000000000000	2	11	544.775	2	-3.87608	0.00017011	3	Os02g0717300|AK065836GLEEDTPVTK000000000000
AK065836	Os02g0717300	Mitochondrial import inner membrane translocase, subunit Tim17/22 family protein. (Os02t0717300-01)	15809.2	R-HVALPGLIR-T	00000000000	42	50	488.309	2	0.106271	0.00111522	3	Os02g0717300|AK065836HVALPGLIR00000000000
AK065836	Os02g0717300	Mitochondrial import inner membrane translocase, subunit Tim17/22 family protein. (Os02t0717300-01)	15809.2	R-VDNGKEYYPYTVENKPAH--	00000000000000000000	133	150	708.671	3	-2.1343	0.02493	3	Os02g0717300|AK065836VDNGKEYYPYTVENKPAH00000000000000000000
AK067050	Os02g0717500	Conserved hypothetical protein. (Os02t0717500-01)	39705.1	R-AVAGGGAAGEEAVR-A	0000000000000000	15	28	607.81	2	-0.324399	1.97327e-06	2	Os02g0717500|AK067050AVAGGGAAGEEAVR0000000000000000
AK067050	Os02g0717500	Conserved hypothetical protein. (Os02t0717500-01)	39705.1	R-TLEAIALAR-E	00000000000	288	296	479.29	2	0.211327	0.00453536	2	Os02g0717500|AK067050TLEAIALAR00000000000
AK073448	Os02g0718900	ADP,ATP carrier protein, mitochondrial precursor (ADP/ATP translocase) (Adenine nucleotide translocator) (ANT). (Os02t0718900-01), ADP,ATP carrier protein, mitochondrial precursor (ADP/ATP translocase) (Adenine nucleotide translocator) (ANT). (Os02t0718900-02)	41697.2	K-GGKNFMIDFLMGGVSAAVSK-T	0000003000030000000000	78	97	687.675	3	-1.82619	0.000272862	41	Os02g0718900|AK073448GGKNFMIDFLMGGVSAAVSK0000003000030000000000
AK073448	Os02g0718900	ADP,ATP carrier protein, mitochondrial precursor (ADP/ATP translocase) (Adenine nucleotide translocator) (ANT). (Os02t0718900-01), ADP,ATP carrier protein, mitochondrial precursor (ADP/ATP translocase) (Adenine nucleotide translocator) (ANT). (Os02t0718900-02)	41697.2	K-NFMIDFLMGGVSAAVSK-T	0003000030000000000	81	97	909.945	2	3.70271	2.91417e-10	41	Os02g0718900|AK073448NFMIDFLMGGVSAAVSK0003000030000000000
AK073448	Os02g0718900	ADP,ATP carrier protein, mitochondrial precursor (ADP/ATP translocase) (Adenine nucleotide translocator) (ANT). (Os02t0718900-01), ADP,ATP carrier protein, mitochondrial precursor (ADP/ATP translocase) (Adenine nucleotide translocator) (ANT). (Os02t0718900-02)	41697.2	R-VKLLIQNQDEMIK-A	000000000003000	106	118	794.442	2	-0.113143	5.91361e-06	41	Os02g0718900|AK073448VKLLIQNQDEMIK000000000003000
AK073448	Os02g0718900	ADP,ATP carrier protein, mitochondrial precursor (ADP/ATP translocase) (Adenine nucleotide translocator) (ANT). (Os02t0718900-01), ADP,ATP carrier protein, mitochondrial precursor (ADP/ATP translocase) (Adenine nucleotide translocator) (ANT). (Os02t0718900-02)	41697.2	K-LLIQNQDEMIK-A	0000000000000	108	118	672.864	2	1.1983	6.33623e-06	41	Os02g0718900|AK073448LLIQNQDEMIK0000000000000
AK073448	Os02g0718900	ADP,ATP carrier protein, mitochondrial precursor (ADP/ATP translocase) (Adenine nucleotide translocator) (ANT). (Os02t0718900-01), ADP,ATP carrier protein, mitochondrial precursor (ADP/ATP translocase) (Adenine nucleotide translocator) (ANT). (Os02t0718900-02)	41697.2	K-LLIQNQDEMIK-A	0000000003000	108	118	680.862	2	1.41963	1.06412e-05	41	Os02g0718900|AK073448LLIQNQDEMIK0000000003000
AK073448	Os02g0718900	ADP,ATP carrier protein, mitochondrial precursor (ADP/ATP translocase) (Adenine nucleotide translocator) (ANT). (Os02t0718900-01), ADP,ATP carrier protein, mitochondrial precursor (ADP/ATP translocase) (Adenine nucleotide translocator) (ANT). (Os02t0718900-02)	41697.2	R-LSEPYKGIGDCFGR-T	0000000000000000	122	135	538.266	3	2.30372	0.00391084	41	Os02g0718900|AK073448LSEPYKGIGDCFGR0000000000000000
AK073448	Os02g0718900	ADP,ATP carrier protein, mitochondrial precursor (ADP/ATP translocase) (Adenine nucleotide translocator) (ANT). (Os02t0718900-01), ADP,ATP carrier protein, mitochondrial precursor (ADP/ATP translocase) (Adenine nucleotide translocator) (ANT). (Os02t0718900-02)	41697.2	R-TIKDEGFASLWR-G	00000000000000	136	147	711.873	2	0.439765	8.27304e-06	41	Os02g0718900|AK073448TIKDEGFASLWR00000000000000
AK073448	Os02g0718900	ADP,ATP carrier protein, mitochondrial precursor (ADP/ATP translocase) (Adenine nucleotide translocator) (ANT). (Os02t0718900-01), ADP,ATP carrier protein, mitochondrial precursor (ADP/ATP translocase) (Adenine nucleotide translocator) (ANT). (Os02t0718900-02)	41697.2	K-DEGFASLWR-G	00000000000	139	147	540.76	2	2.40601	0.000142522	41	Os02g0718900|AK073448DEGFASLWR00000000000
AK073448	Os02g0718900	ADP,ATP carrier protein, mitochondrial precursor (ADP/ATP translocase) (Adenine nucleotide translocator) (ANT). (Os02t0718900-01), ADP,ATP carrier protein, mitochondrial precursor (ADP/ATP translocase) (Adenine nucleotide translocator) (ANT). (Os02t0718900-02)	41697.2	R-YFPTQALNFAFK-D	00000000000000	156	167	723.876	2	1.86168	1.4901e-08	41	Os02g0718900|AK073448YFPTQALNFAFK00000000000000
AK073448	Os02g0718900	ADP,ATP carrier protein, mitochondrial precursor (ADP/ATP translocase) (Adenine nucleotide translocator) (ANT). (Os02t0718900-01), ADP,ATP carrier protein, mitochondrial precursor (ADP/ATP translocase) (Adenine nucleotide translocator) (ANT). (Os02t0718900-02)	41697.2	R-QFNGLVDVYR-K	000000000000	229	238	605.815	2	0.808308	1.87844e-05	41	Os02g0718900|AK073448QFNGLVDVYR000000000000
AK073448	Os02g0718900	ADP,ATP carrier protein, mitochondrial precursor (ADP/ATP translocase) (Adenine nucleotide translocator) (ANT). (Os02t0718900-01), ADP,ATP carrier protein, mitochondrial precursor (ADP/ATP translocase) (Adenine nucleotide translocator) (ANT). (Os02t0718900-02)	41697.2	R-QFNGLVDVYR-K	200000000000	229	238	597.301	2	-0.872459	0.00025323	41	Os02g0718900|AK073448QFNGLVDVYR200000000000
AK073448	Os02g0718900	ADP,ATP carrier protein, mitochondrial precursor (ADP/ATP translocase) (Adenine nucleotide translocator) (ANT). (Os02t0718900-01), ADP,ATP carrier protein, mitochondrial precursor (ADP/ATP translocase) (Adenine nucleotide translocator) (ANT). (Os02t0718900-02)	41697.2	R-QFNGLVDVYRK-T	0000000000000	229	239	669.862	2	0.644685	1.41794e-06	41	Os02g0718900|AK073448QFNGLVDVYRK0000000000000
AK073448	Os02g0718900	ADP,ATP carrier protein, mitochondrial precursor (ADP/ATP translocase) (Adenine nucleotide translocator) (ANT). (Os02t0718900-01), ADP,ATP carrier protein, mitochondrial precursor (ADP/ATP translocase) (Adenine nucleotide translocator) (ANT). (Os02t0718900-02)	41697.2	R-QFNGLVDVYRK-T	2000000000000	229	239	661.349	2	1.2531	0.00016597	41	Os02g0718900|AK073448QFNGLVDVYRK2000000000000
AK073448	Os02g0718900	ADP,ATP carrier protein, mitochondrial precursor (ADP/ATP translocase) (Adenine nucleotide translocator) (ANT). (Os02t0718900-01), ADP,ATP carrier protein, mitochondrial precursor (ADP/ATP translocase) (Adenine nucleotide translocator) (ANT). (Os02t0718900-02)	41697.2	K-TLKSDGIAGLYR-G	00000000000000	240	251	647.362	2	0.660117	0.000134948	41	Os02g0718900|AK073448TLKSDGIAGLYR00000000000000
AK073448	Os02g0718900	ADP,ATP carrier protein, mitochondrial precursor (ADP/ATP translocase) (Adenine nucleotide translocator) (ANT). (Os02t0718900-01), ADP,ATP carrier protein, mitochondrial precursor (ADP/ATP translocase) (Adenine nucleotide translocator) (ANT). (Os02t0718900-02)	41697.2	K-SDGIAGLYR-G	00000000000	243	251	476.249	2	0.666308	3.13626e-05	41	Os02g0718900|AK073448SDGIAGLYR00000000000
AK073448	Os02g0718900	ADP,ATP carrier protein, mitochondrial precursor (ADP/ATP translocase) (Adenine nucleotide translocator) (ANT). (Os02t0718900-01), ADP,ATP carrier protein, mitochondrial precursor (ADP/ATP translocase) (Adenine nucleotide translocator) (ANT). (Os02t0718900-02)	41697.2	R-GFNISCVGIIVYR-G	000000000000000	252	264	756.406	2	0.879307	0.00536817	41	Os02g0718900|AK073448GFNISCVGIIVYR000000000000000
AK073448	Os02g0718900	ADP,ATP carrier protein, mitochondrial precursor (ADP/ATP translocase) (Adenine nucleotide translocator) (ANT). (Os02t0718900-01), ADP,ATP carrier protein, mitochondrial precursor (ADP/ATP translocase) (Adenine nucleotide translocator) (ANT). (Os02t0718900-02)	41697.2	R-MMMTSGEAVK-Y	033300000000	315	324	566.736	2	-3.528	0.00119383	41	Os02g0718900|AK073448MMMTSGEAVK033300000000
AK073448	Os02g0718900	ADP,ATP carrier protein, mitochondrial precursor (ADP/ATP translocase) (Adenine nucleotide translocator) (ANT). (Os02t0718900-01), ADP,ATP carrier protein, mitochondrial precursor (ADP/ATP translocase) (Adenine nucleotide translocator) (ANT). (Os02t0718900-02)	41697.2	K-YKSSMDAFSQILK-N	000003000000000	325	337	511.927	3	2.10943	0.0218282	41	Os02g0718900|AK073448YKSSMDAFSQILK000003000000000
AK073448	Os02g0718900	ADP,ATP carrier protein, mitochondrial precursor (ADP/ATP translocase) (Adenine nucleotide translocator) (ANT). (Os02t0718900-01), ADP,ATP carrier protein, mitochondrial precursor (ADP/ATP translocase) (Adenine nucleotide translocator) (ANT). (Os02t0718900-02)	41697.2	K-SSMDAFSQILK-N	0003000000000	327	337	621.807	2	2.33777	0.000136077	41	Os02g0718900|AK073448SSMDAFSQILK0003000000000
AK073448	Os02g0718900	ADP,ATP carrier protein, mitochondrial precursor (ADP/ATP translocase) (Adenine nucleotide translocator) (ANT). (Os02t0718900-01), ADP,ATP carrier protein, mitochondrial precursor (ADP/ATP translocase) (Adenine nucleotide translocator) (ANT). (Os02t0718900-02)	41697.2	K-SSMDAFSQILK-N	0000000000000	327	337	613.807	2	-1.76395	0.000333868	41	Os02g0718900|AK073448SSMDAFSQILK0000000000000
AK073448	Os02g0718900	ADP,ATP carrier protein, mitochondrial precursor (ADP/ATP translocase) (Adenine nucleotide translocator) (ANT). (Os02t0718900-01), ADP,ATP carrier protein, mitochondrial precursor (ADP/ATP translocase) (Adenine nucleotide translocator) (ANT). (Os02t0718900-02)	41697.2	K-SSMDAFSQILKNEGAK-S	000300000000000000	327	342	871.424	2	-0.648761	4.55534e-05	41	Os02g0718900|AK073448SSMDAFSQILKNEGAK000300000000000000
AK111503	Os02g0719800	Similar to AML1. (Os02t0719800-01), Nucleotide-binding, alpha-beta plait domain containing protein. (Os02t0719800-02), Similar to AML1. (Os02t0719800-03)	93767.2	K-LKELDDDPEGK-D	0000000000000	82	92	629.81	2	-2.21379	0.0218027	1	Os02g0719800|AK111503LKELDDDPEGK0000000000000
AK101764	Os02g0720700	Similar to Chloride channel protein CLC-f (AtCLC-f). Splice isoform 2. (Os02t0720700-01)	84574.6	K-SCANGCSEMMENNRER-R	000000000030000000	252	267	663.588	3	-8.75419	0.0429507	1	Os02g0720700|AK101764SCANGCSEMMENNRER000000000030000000
AK099781	Os02g0720900	Peptidase A1 domain containing protein. (Os02t0720900-01), Hypothetical conserved gene. (Os02t0720900-02), Hypothetical conserved gene. (Os02t0720900-03), Similar to Aspartic proteinase nepenthesin-1. (Os02t0720900-04)	48379.9	R-LPTSVYSALSK-A	0000000000000	348	358	583.326	2	-1.57016	0.00486241	2	Os02g0720900|AK099781LPTSVYSALSK0000000000000
AK099781	Os02g0720900	Peptidase A1 domain containing protein. (Os02t0720900-01), Hypothetical conserved gene. (Os02t0720900-02), Hypothetical conserved gene. (Os02t0720900-03), Similar to Aspartic proteinase nepenthesin-1. (Os02t0720900-04)	48379.9	R-VSAPAVTMSFAGGAALK-L	0000000030000000000	387	403	797.419	2	0.752103	0.00258674	2	Os02g0720900|AK099781VSAPAVTMSFAGGAALK0000000030000000000
J080062N15	Os02g0723300	Hypothetical conserved gene. (Os02t0723300-01)	14361.3	K-EGNQFSTAQSVK-Q	00000000000000	55	66	648.315	2	-0.47203	0.00150613	1	Os02g0723300|J080062N15EGNQFSTAQSVK00000000000000
AK104276	Os02g0725100	Thioredoxin fold domain containing protein. (Os02t0725100-01), Thioredoxin fold domain containing protein. (Os02t0725100-02)	47610.5	R-GQMGLSEEEQR-K	0003000000000	296	306	640.28	2	-3.71284	0.0439004	1	Os02g0725100|AK104276GQMGLSEEEQR0003000000000
AK099178	Os02g0726000	FAS1 domain domain containing protein. (Os02t0726000-01), FAS1 domain domain containing protein. (Os02t0726000-02)	27549.1	R-QLTATGLADDIDGR-N	0000000000000000	42	55	723.364	2	-1.6856	9.75093e-06	7	Os02g0726000|AK099178QLTATGLADDIDGR0000000000000000
AK099178	Os02g0726000	FAS1 domain domain containing protein. (Os02t0726000-01), FAS1 domain domain containing protein. (Os02t0726000-02)	27549.1	R-QLTATGLADDIDGR-N	2000000000000000	42	55	714.854	2	3.19405	0.00641528	7	Os02g0726000|AK099178QLTATGLADDIDGR2000000000000000
AK099178	Os02g0726000	FAS1 domain domain containing protein. (Os02t0726000-01), FAS1 domain domain containing protein. (Os02t0726000-02)	27549.1	R-NTITVLAVDDAHMAQLR-A	0000000000000300000	56	72	942.487	2	0.856391	0.000617935	7	Os02g0726000|AK099178NTITVLAVDDAHMAQLR0000000000000300000
AK099178	Os02g0726000	FAS1 domain domain containing protein. (Os02t0726000-01), FAS1 domain domain containing protein. (Os02t0726000-02)	27549.1	R-LPGGSAVVSTLFQASGDAPGSEGMVK-I	0000000000000000000000003000	102	127	826.747	3	3.08103	0.00225171	7	Os02g0726000|AK099178LPGGSAVVSTLFQASGDAPGSEGMVK0000000000000000000000003000
AK099178	Os02g0726000	FAS1 domain domain containing protein. (Os02t0726000-01), FAS1 domain domain containing protein. (Os02t0726000-02)	27549.1	R-VAFVPQDVDDAR-A	00000000000000	136	147	666.332	2	-1.85887	0.00341923	7	Os02g0726000|AK099178VAFVPQDVDDAR00000000000000
AK069154	Os02g0727100	Amino acid transporter, transmembrane domain containing protein. (Os02t0727100-01)	48432.3	R-AVGATSYGEAMGDAFGAFGR-G	0000000000030000000000	93	112	975.937	2	0.675576	0.00371696	1	Os02g0727100|AK069154AVGATSYGEAMGDAFGAFGR0000000000030000000000
AK109840	Os02g0728700	Conserved hypothetical protein. (Os02t0728700-01)	41945.9	K-KTTDTETGTAVGSVSLAAMQEK-M	000000000000000000000000	293	314	742.377	3	8.60389	0.0173951	1	Os02g0728700|AK109840KTTDTETGTAVGSVSLAAMQEK000000000000000000000000
AY476807	Os02g0729400	Similar to Extracellular calcium sensing receptor. (Os02t0729400-01)	39426.1	K-VVDTVDQVIGVGGK-V	0000000000000000	67	80	693.389	2	5.247	4.4668e-06	3	Os02g0729400|AY476807VVDTVDQVIGVGGK0000000000000000
AY476807	Os02g0729400	Similar to Extracellular calcium sensing receptor. (Os02t0729400-01)	39426.1	K-QATEALQGAGVDPAPVLSAAK-T	00000000000000000000000	124	144	997.532	2	0.703026	0.0105762	3	Os02g0729400|AY476807QATEALQGAGVDPAPVLSAAK00000000000000000000000
AY476807	Os02g0729400	Similar to Extracellular calcium sensing receptor. (Os02t0729400-01)	39426.1	K-TVADAAQQGTK-V	0000000000000	145	155	545.282	2	2.16369	0.000151084	3	Os02g0729400|AY476807TVADAAQQGTK0000000000000
AK121610	Os02g0730000	Similar to Mitochondrial aldehyde dehydrogenase. (Os02t0730000-01), Mitochondrial aldehyde dehydrogenase ALDH2a. (Os02t0730000-02)	59221.5	R-VAEGDAEDVNR-A	0000000000000	104	114	587.77	2	-1.42329	3.63725e-10	2	Os02g0730000|AK121610VAEGDAEDVNR0000000000000
AK121610	Os02g0730000	Similar to Mitochondrial aldehyde dehydrogenase. (Os02t0730000-01), Mitochondrial aldehyde dehydrogenase ALDH2a. (Os02t0730000-02)	59221.5	K-SGVDSGATLVAGGDR-A	00000000000000000	411	425	681.336	2	-1.33877	1.60148e-07	2	Os02g0730000|AK121610SGVDSGATLVAGGDR00000000000000000
AK058271	Os02g0731600	Conserved hypothetical protein. (Os02t0731600-01)	11764.2	K-ELADDVDSLK-K	000000000000	92	101	552.775	2	1.23333	0.0290703	1	Os02g0731600|AK058271ELADDVDSLK000000000000
AK111722	Os02g0732500	Similar to ADP-ribosylation factor-like protein. (Os02t0732500-01)	20891	K-SELHDLLTK-Q	00000000000	108	116	528.291	2	1.40847	0.000835318	2	Os02g0732500|AK111722SELHDLLTK00000000000
AK111722	Os02g0732500	Similar to ADP-ribosylation factor-like protein. (Os02t0732500-01)	20891	K-QSLAGIPLLVLGNK-I	0000000000000000	117	130	711.938	2	1.0155	0.006461	2	Os02g0732500|AK111722QSLAGIPLLVLGNK0000000000000000
AK121868	Os02g0732700	Conserved hypothetical protein. (Os02t0732700-01), Similar to F26F24.8. (Os02t0732700-02), Similar to F26F24.8. (Os02t0732700-03)	183467	R-CLRHALR-T	000000000	442	448	470.262	2	-14.6211	0.0117535	1	Os02g0732700|AK121868CLRHALR000000000
J013041K06	Os02g0734400	Similar to ABA-induced protein. (Os02t0734400-00)	19828	K-TVPDGLTAAELDEMLR-A	000000000000003000	97	112	873.931	2	-1.87842	0.0159154	1	Os02g0734400|J013041K06TVPDGLTAAELDEMLR000000000000003000
AK070347	Os02g0734600	Similar to EFA27 for EF hand, abscisic acid, 27kD. (Os02t0734600-01), Similar to caleosin related protein. (Os02t0734600-02)	40166.5	K-GIHGSDSSAYDSEGR-F	00000000000000000	268	282	769.329	2	-0.989827	0.0035648	2	Os02g0734600|AK070347GIHGSDSSAYDSEGR00000000000000000
AK059269	Os02g0734900	Conserved hypothetical protein. (Os02t0734900-01)	15358.2	R-LDQLQQR-V	000000000	117	123	450.747	2	-2.72271	0.000257624	2	Os02g0734900|AK059269LDQLQQR000000000
AK109397	Os02g0735200	Glutamine synthetase shoot isozyme (EC 6.3.1.2) (Glutamate--ammonia ligase) (Clone lambda-GS28). (Os02t0735200-01), Glutamine synthetase shoot isozyme (EC 6.3.1.2) (Glutamate--ammonia ligase) (Clone lambda-GS28). (Os02t0735200-02)	39460.6	R-HKEHISAYGEGNER-R	0000000000000000	277	290	542.927	3	2.36487	2.5668e-05	3	Os02g0735200|AK109397HKEHISAYGEGNER0000000000000000
AK109397	Os02g0735200	Glutamine synthetase shoot isozyme (EC 6.3.1.2) (Glutamate--ammonia ligase) (Clone lambda-GS28). (Os02t0735200-01), Glutamine synthetase shoot isozyme (EC 6.3.1.2) (Glutamate--ammonia ligase) (Clone lambda-GS28). (Os02t0735200-02)	39460.6	R-HETADINTFSWGVANR-G	000000000000000000	296	311	909.433	2	0.851236	0.00898872	3	Os02g0735200|AK109397HETADINTFSWGVANR000000000000000000
AK065229	Os02g0736400	Aldolase-type TIM barrel domain containing protein. (Os02t0736400-01)	45777.1	K-SGCEGVSAINTIMSVMGINLK-T	00000000000000003000000	235	255	737.709	3	13.6539	0.0124198	2	Os02g0736400|AK065229SGCEGVSAINTIMSVMGINLK00000000000000003000000
AK065229	Os02g0736400	Aldolase-type TIM barrel domain containing protein. (Os02t0736400-01)	45777.1	K-SGCEGVSAINTIMSVMGINLK-T	00000000000003000000000	235	255	737.709	3	13.4914	0.0214485	2	Os02g0736400|AK065229SGCEGVSAINTIMSVMGINLK00000000000003000000000
AK065166	Os02g0736500	Nicastrin family protein. (Os02t0736500-01)	72984.7	K-MVDALQSASESLGSDNVK-V	03000000000000000000	370	387	933.942	2	0.709664	2.88102e-08	1	Os02g0736500|AK065166MVDALQSASESLGSDNVK03000000000000000000
[truncated: 4,490 more rows]
