# Supplementary material for: Identification of Proteins Enriched in Rice Egg or Sperm Cells by Single-Cell Proteomics
Source: PLoS One. 2013 Jul 25;8(7):e69578. doi: 10.1371/journal.pone.0069578 (PMC3723872; doi:10.1371/journal.pone.0069578)
Supplement: Table S9 — Proteins enriched in rice egg cells. (XLS) [file pone.0069578.s012.xls]

## Sheet: Table S9
Table S9. Proteins preferentially detected in rice egg cells. The number of identified spectra in the egg cell and other other cell types are presented.
cDNA accession	Gene locus	Number of spectrum identifieda					Proteinb
		Egg cell	Sperm cell	Callus	Seedling	Pollen grains
AK106474	Os06g0602400	17	0	0	0	1	Similar to DEAD-box protein 3 (DEAD-box RNA helicase DEAD3)
AK065887	Os03g0283100	15	0	1	0	0	Similar to In2-1 protein
Os06t0706700-01	Os06g0706700	14	0	0	0	0	Similar to PsAD1
AK101183	Os05g0168800	11	0	1	0	0	KIP1-like domain containing protein
AK063589	Os05g0115600	10	0	0	0	0	Protein of unknown function DUF674 family protein
AK106371	Os03g0276800	9	0	0	0	0	Heat shock protein Hsp70 family protein
AK107844	Os05g0143600	9	0	0	0	0	Similar to Jasmonate-induced protein
AK067215	Os01g0698000	8	0	0	0	0	Conserved hypothetical protein
AK063560	Os12g0600100	8	0	0	0	0	Tetratricopeptide-like helical domain containing protein
AK121612	Os02g0717400	8	0	0	0	1	Tetratricopeptide-like helical domain containing protein
AK073477	Os01g0369200	7	0	0	0	0	Similar to Cullin-1
AK058611	Os01g0895100	7	0	0	0	0	Similar to Membrane-associated 30 kDa protein, chloroplast precursor
AK106478	Os01g0771100	7	0	1	0	0	Mitochondrial glycoprotein family protein
AK072587	Os05g0164900	6	0	0	0	0	Galactose oxidase/kelch, beta-propeller domain containing protein
AK067210	Os04g0504800	6	0	1	0	0	Similar to Poly(A)-binding protein
AK072334	Os03g0583900	5	0	0	0	0	DEAD-like helicase, N-terminal domain containing protein
AK119521	Os06g0175800	5	0	0	0	0	Similar to Cystathionine beta-lyase, chloroplast precursor (EC 4.4.1.8)
AK069281	Os09g0471100	5	0	0	0	0	Similar to Peroxidase 17 precursor (EC 1.11.1.7)
AK072719	Os10g0574800	5	0	0	0	0	Similar to ARF GAP-like zinc finger-containing protein ZIGA2
AK064995	Os12g0197500	5	0	0	0	0	Putative Zinc finger, XS and XH domain containing protein
Os01t0876900-00	Os01g0876900	5	0	1	0	0	Conserved hypothetical protein
AK121757	Os02g0697600	4	0	0	0	0	ATPase, AAA-type, core domain containing protein
AK105648	Os03g0264400	4	0	0	0	0	Anthranilate synthase alpha 2 subunit
AK109486	Os04g0346800	4	0	0	0	0	EAR repeat containing protein
AK067729	Os07g0495900	4	0	0	0	0	Similar to Regulator of nonsense transcripts 1 homolog
AK070485	Os05g0555600	4	0	0	0	1	Similar to NADH dependent Glutamate Synthase precursor (EC 1.4.1.14)
AK100247	Os06g0265000	4	0	0	0	1	Similar to Asparagine synthetase
AK067100	Os02g0440000	4	0	0	1	0	Similar to Diaminopimelate decarboxylase
AK068532	Os08g0530400	4	0	0	1	0	Moco containing protein (OsMCP)
AK120871	Os01g0772800	4	0	1	0	0	Similar to Signal recognition particle 54 kDa protein 2 (SRP54)
AK064040	Os04g0600200	4	1	0	0	0	Alternative oxidase 1a
AK067279	Os02g0141300	3	0	0	0	0	Ribosomal protein S5 domain 2-type fold domain containing protein
AB049822	Os02g0510200	3	0	0	0	0	Similar to Acetolactate synthase 1, chloroplastic
AK105696	Os02g0754500	3	0	0	0	0	Tetratricopeptide-like helical domain containing protein
AK060823	Os02g0813300	3	0	0	0	0	Cyclin-like F-box domain containing protein
AK103443	Os04g0306400	3	0	0	0	0	Ribose 5-phosphate isomerase family protein
AK058345	Os05g0383000	3	0	0	0	0	Tetratricopeptide-like helical domain containing protein
AK101147	Os05g0490200	3	0	0	0	0	Protein of unknown function DUF1692 domain containing protein
AK100910	Os05g0580000	3	0	0	0	0	Similar to ADP-glucose pyrophosphorylase (EC 2.7.7.27)
AK058833	Os06g0115300	3	0	0	0	0	Similar to Acyl-CoA-binding protein 2 (ACBP 2)
AK102866	Os06g0151600	3	0	0	0	0	DNA repair protein RadA family protein
AK100837	Os06g0338900	3	0	0	0	0	Bacterial transferase hexapeptide repeat domain containing protein
AK061733	Os06g0643300	3	0	0	0	0	Development protein-like protein
AK063693	Os07g0623000	3	0	0	0	0	Protein of unknown function DUF343 family protein
AK067207	Os07g0639600	3	0	0	0	0	Peptidase C15, pyroglutamyl peptidase I family protein
AK067167	Os10g0563600	3	0	0	0	0	Similar to Peptide methionine sulfoxide reductase (EC 1.8.4.6)
AK061002	Os01g0276500	3	0	0	0	1	Similar to Histidine biosynthesis bifunctional protein hisIE, chloroplast precursor
AK121331	Os01g0816400	3	0	0	0	1	Similar to microtubule organization protein
AK121680	Os03g0126000	3	0	0	0	1	Similar to Phosphorybosyl anthranilate transferase 1
AK109339	Os01g0106400	3	0	0	1	0	Similar to Isoflavone reductase homolog IRL (EC 1.3.1.-)
AK103256	Os03g0645100	3	0	0	1	0	Similar to Pyruvate dehydrogenase E1 beta subunit
AK103539	Os03g0688200	3	0	0	1	0	Conserved hypothetical protein
AK065107	Os01g0603000	3	0	1	0	0	Similar to Nuclear RNA binding protein A
Os02t0120900-01	Os02g0120900	3	0	1	0	0	Tetrahydrofolate dehydrogenase/cyclohydrolase family protein
AK101289	Os03g0832300	3	0	1	0	0	Conserved hypothetical protein
AK064563	Os05g0144900	3	0	1	0	0	Similar to Sucrose-phosphatase (EC 3.1.3.24)
AK121504	Os06g0157800	3	0	1	0	0	Similar to CG7224
AK064628	Os07g0625500	3	0	1	0	0	Similar to Fimbriata-associated protein
AK067232	Os11g0147000	3	0	1	0	0	Similar to Long chain acyl-CoA synthetase 6 (EC 6.2.1.3)
AK065216	Os12g0143900	3	0	1	0	0	Similar to Long chain acyl-CoA synthetase 6 (EC 6.2.1.3)
AK069067	Os04g0464500	3	1	0	0	0	SEP domain containing protein
AK120435	Os06g0210100	3	1	0	0	0	emp24/gp25L/p24 family protein
AK121293	Os01g0169900	2	0	0	0	0	Protein of unknown function DUF1421 family protein
AK061023	Os01g0570700	2	0	0	0	0	Similar to Carbamoyl-phosphate synthase large chain (EC 6.3.5.5)
Os01t0737600-00	Os01g0737600	2	0	0	0	0	Similar to OSIGBa0101A01.4 protein
AK121744	Os01g0757500	2	0	0	0	0	CS domain domain containing protein
AK068786	Os01g0866300	2	0	0	0	0	Similar to VAMP-like protein YKT61 (AtYKT61)
AK073599	Os01g0964000	2	0	0	0	0	Similar to VAMP-like protein YKT61 (AtYKT61)
AK109261	Os02g0607700	2	0	0	0	0	Short-chain dehydrogenase/reductase SDR domain containing protein
AK073092	Os02g0706500	2	0	0	0	0	ATPase, AAA-type, core domain containing protein
AK105284	Os02g0717800	2	0	0	0	0	Similar to 60S ribosomal protein L31
AK102281	Os02g0720300	2	0	0	0	0	Protein-tyrosine phosphatase, dual specificity domain containing protein.
AK070007	Os02g0768200	2	0	0	0	0	emp24/gp25L/p24 family protein
AK069518	Os03g0179000	2	0	0	0	0	Similar to Tubulin-tyrosine ligase family protein, expressed
AK102392	Os03g0255500	2	0	0	0	0	Similar to Phosphoenolpyruvate carboxykinase 4 (EC 4.1.1.49)
AK101685	Os03g0418800	2	0	0	0	0	Nucleotide-binding, alpha-beta plait domain containing protein
AK059181	Os03g0633900	2	0	0	0	0	Nucleic acid-binding, OB-fold-like domain containing protein
Os04t0212200-01	Os04g0212200	2	0	0	0	0	Similar to protein binding
AK112050	Os04g0376300	2	0	0	0	0	Similar to 3-oxoacyl reductase, chloroplast precursor (EC 1.1.1.100)
AK107879	Os04g0463500	2	0	0	0	0	Similar to Anthranilate synthase beta chain
AK102028	Os04g0513000	2	0	0	0	0	Conserved hypothetical protein
AK065249	Os04g0599700	2	0	0	0	0	Cobalamin (vitamin B12) biosynthesis CobW-like domain containing protein
J043006J10	Os04g0642100	2	0	0	0	0	Microtubule-associated protein EB1
AK102584	Os05g0103600	2	0	0	0	0	Similar to Ankyrin-like protein
AK072352	Os05g0365500	2	0	0	0	0	Tetratricopeptide-like helical domain containing protein
AK101162	Os05g0430800	2	0	0	0	0	Similar to Amidophosphoribosyltransferase, chloroplast precursor (EC 2.4.2.14)
AK064382	Os05g0463900	2	0	0	0	0	HECT domain containing protein
AK061460	Os06g0233400	2	0	0	0	0	Defective in cullin neddylation domain containing protein
AK067233	Os06g0320100	2	0	0	0	0	Protein of unknown function DUF773 family protein
AK068653	Os06g0709000	2	0	0	0	0	NAD(P)-binding domain containing protein
J065139G01	Os07g0123700	2	0	0	0	0	PUL domain containing protein
AK111609	Os07g0164000	2	0	0	0	0	Methyltransferase type 12 domain containing protein
AK068132	Os07g0172500	2	0	0	0	0	Similar to DNA-directed RNA polymerase II 13.6 kDa polypeptide (EC 2.7.7.6)
AB078881	Os07g0498800	2	0	0	0	0	Similar to Calreticulin interacted protein
AK073278	Os07g0625400	2	0	0	0	0	BTB/POZ fold domain containing protein
AK102629	Os07g0632600	2	0	0	0	0	Heat shock protein DnaJ, N-terminal domain containing protein
AK074012	Os07g0639800	2	0	0	0	0	Similar to Eukaryotic translation initiation factor 6
Os08t0513600-01	Os08g0513600	2	0	0	0	0	Hypothetical conserved gene. (Os07t0113000-01)
AK060069	Os09g0396300	2	0	0	0	0	Peptidase C15, pyroglutamyl peptidase I family protein
AK071684	Os09g0544900	2	0	0	0	0	MaoC-like dehydratase domain containing protein
J100071A15	Os11g0703100	2	0	0	0	0	Thaumatin, pathogenesis-related family protein
AK101252	Os12g0599900	2	0	0	0	0	Tetratricopeptide-like helical domain containing protein
a. The highest number of spectra assigned for the protein among gel pieces from SDS-PAGE gel of the each cell-type was presented.
b. Protein annotations are referred from The Rice Annotation Project Database (RAPDB).
